# Supplementary material for: Targeting the Post-Synaptic Proteome in Alzheimer Disease with Psychosis
Source: Research Square preprint supplement (doi:10.21203/rs.3.rs-1514870/v1), 2022-04-04
Supplement: Supplementary file 1 [file 18c7e6fa48e3250dfdade355.xlsx]

## Sheet: Table 1
Annotation Cluster 1	Enrichment Score: 6.023503573405143
Category	Term	Count	%	PValue	List Total	Pop Hits	Pop Total	Fold Enrichment	Bonferroni	Benjamini	FDR	Uniprot Accession #
INTERPRO	IPR011993:Pleckstrin homology-like domain	40	8.67679	8.25217e-08	454	65	1574	2.13351	7.50094e-05	2.24496e-05	2.21285e-05	P25098, O15020, Q9UPR0, O75689, Q13613, O75962, Q9Y5S2, Q96QG7, Q96PV0, Q9NQW6, Q9UJF2, Q5JU85, Q9ULH1, Q99490, O00401, Q96P47, O14827, P11274, Q86YM7, Q02410, Q9Y4G6, Q7Z6G8, Q14155, Q92974, Q92556, O95248, Q92529, Q13884, Q9Y217, Q5T5U3, Q12979, Q9Y4F1, Q01082, Q9H254, P11277, Q9BZF1, Q96JJ3, Q9UNA1, Q6DN90, O14578
INTERPRO	IPR001849:Pleckstrin homology domain	31	6.72451	9.87882e-08	454	45	1574	2.38835	8.97944e-05	2.24496e-05	2.21285e-05	P25098, O15020, Q9UPR0, O75689, O75962, Q9Y5S2, Q96PV0, Q9NQW6, Q9UJF2, Q5JU85, Q9ULH1, Q99490, Q96P47, O14827, P11274, Q14155, Q92974, Q92556, O95248, Q13884, Q5T5U3, Q12979, Q9Y4F1, Q01082, Q9H254, P11277, Q9BZF1, Q96JJ3, Q9UNA1, Q6DN90, O14578
UP_SEQ_FEATURE	domain:PH	25	5.42299	4.08519e-06	461	37	1603	2.34948	0.00581668	0.000583774	0.000572336	P25098, O15020, Q9UPR0, Q9Y5S2, Q96PV0, Q9NQW6, Q9UJF2, Q5JU85, Q9ULH1, Q99490, Q96P47, P11274, Q14155, Q92974, Q92556, O95248, Q5T5U3, Q12979, Q01082, Q9H254, Q9BZF1, Q96JJ3, Q9UNA1, Q6DN90, O14578
SMART	SM00233:PH	29	6.29067	2.41824e-05	284	42	797	1.93771	0.00453604	0.0028696	0.00282381	P25098, O15020, Q9UPR0, O75689, O75962, Q9Y5S2, Q96PV0, Q9NQW6, Q9UJF2, Q5JU85, Q9ULH1, Q99490, Q96P47, O14827, P11274, Q14155, Q92974, O95248, Q13884, Q5T5U3, Q12979, Q9Y4F1, Q01082, Q9H254, P11277, Q9BZF1, Q9UNA1, Q6DN90, O14578
Annotation Cluster 2	Enrichment Score: 5.8553330461579325
Category	Term	Count	%	PValue	List Total	Pop Hits	Pop Total	Fold Enrichment	Bonferroni	Benjamini	FDR	Uniprot Accession #
GOTERM_BP_DIRECT	GO:0043547~positive regulation of GTPase activity	59	12.7983	1.15624e-10	441	99	1536	2.07572	2.50095e-07	2.50095e-07	2.50095e-07	Q8N1I0, Q13555, Q13554, Q9H2M9, Q13557, Q96PV0, Q9H6U6, Q9UJF2, Q99490, Q96P47, Q9Y4G8, O14827, P55196, P78352, P49815, Q92974, O95248, Q92529, Q9Y2X7, P35609, Q01082, Q9UQM7, Q684P5, Q8WU79, P86790, Q9Y6D6, Q9Y6D5, Q17R89, P00533, O15020, P50395, O43295, O75689, Q13813, O75962, Q9NRY4, Q5JU85, Q9ULH1, Q8WZA2, O75044, Q14C86, Q9NPQ8, P11274, A7KAX9, P06241, Q15042, P47736, Q14155, Q92556, Q5T5U3,…
UP_KEYWORDS	GTPase activation	29	6.29067	2.52543e-07	461	42	1604	2.40244	7.92955e-05	1.13284e-05	1.0679e-05	P50395, O43295, Q9H2M9, O75689, Q9NRY4, Q96PV0, Q9UJF2, Q9ULH1, Q99490, O75044, Q14C86, Q96P47, Q9Y4G8, P11274, A7KAX9, Q15042, P49815, P47736, Q6GYQ0, Q9Y2X7, Q5T5U3, Q12979, Q684P5, Q8WU79, Q9UNA1, Q4KMP7, Q66K14, Q17R89, Q9HA65
GOTERM_MF_DIRECT	GO:0005096~GTPase activator activity	33	7.15835	6.54446e-06	442	56	1524	2.03184	0.00400373	0.00100294	0.00100294	Q8N1I0, P50395, O43295, Q9H2M9, O75689, Q9NRY4, Q96PV0, Q9UJF2, Q9ULH1, Q99490, O75044, Q14C86, Q96P47, Q9NPQ8, Q9Y4G8, P11274, A7KAX9, Q15042, P49815, P47736, Q6GYQ0, Q9Y2X7, Q5T5U3, Q12979, Q684P5, Q8WU79, Q9Y6D6, Q9UNA1, Q4KMP7, Q66K14, Q9C0H5, Q17R89, Q9HA65
GOTERM_BP_DIRECT	GO:0051056~regulation of small GTPase mediated signal transduction	20	4.33839	6.9204e-05	441	30	1536	2.322	0.139028	0.0374221	0.0374221	P50395, O43295, Q6GYQ0, O75962, Q9NRY4, Q12979, Q684P5, O75044, Q8IXI2, P84095, O14827, P11274, Q9UNA1, A7KAX9, Q9C0H5, Q17R89, P49815, P47736, Q14155, Q92974
INTERPRO	IPR008936:Rho GTPase activation protein	13	2.81996	0.000399894	454	17	1574	2.6512	0.304815	0.0259646	0.0255932	O43295, Q9NRY4, Q5T5U3, Q96PV0, Q9UJF2, Q12979, O75044, Q14C86, P11274, Q9UNA1, A7KAX9, Q9C0H5, Q17R89
Annotation Cluster 3	Enrichment Score: 5.278254516152497
Category	Term	Count	%	PValue	List Total	Pop Hits	Pop Total	Fold Enrichment	Bonferroni	Benjamini	FDR	Uniprot Accession #
UP_SEQ_FEATURE	domain:Protein kinase	37	8.02603	1.88316e-08	461	56	1603	2.29745	2.68912e-05	1.34552e-05	1.31916e-05	Q8IU85, Q8N568, P25098, Q13555, Q13554, P05129, Q8N5S9, Q9Y3S1, O75962, Q9Y5S2, Q8IWQ3, Q13557, Q9UHD2, P53667, P17252, P06241, Q96KG9, Q9UEW8, P05771, Q14012, Q8NCB2, Q7KZI7, O15075, O95747, Q02156, Q07002, P53779, Q9UQM7, Q96RR4, Q8TDC3, O14936, P00533, Q16566, O14578, P41743, Q13131, O14976
INTERPRO	IPR000719:Protein kinase, catalytic domain	37	8.02603	4.04675e-08	454	57	1574	2.25048	3.67843e-05	2.24496e-05	2.21285e-05	Q8IU85, Q8N568, P25098, Q13555, Q13554, P05129, Q8N5S9, Q9Y3S1, O75962, Q9Y5S2, Q8IWQ3, Q13557, Q9UHD2, P53667, P17252, P06241, Q96KG9, Q9UEW8, P05771, Q14012, Q8NCB2, Q7KZI7, O15075, O95747, Q02156, Q07002, P53779, Q9UQM7, Q96RR4, Q8TDC3, O14936, P00533, Q16566, O14578, P41743, Q13131, O14976
GOTERM_BP_DIRECT	GO:0006468~protein phosphorylation	36	7.80911	4.11457e-08	441	55	1536	2.27978	8.89942e-05	4.44991e-05	4.44991e-05	Q8IU85, Q13554, P05129, Q8N5S9, Q9Y3S1, O75962, Q9Y5S2, Q8IWQ3, Q13557, P54619, P53667, P42345, P11274, P17252, P06241, Q9UEW8, P05771, Q14012, Q8NCB2, Q7KZI7, O15075, O95747, Q02156, Q07002, P53779, Q9UQM7, Q96RR4, Q8TDC3, O14936, P23677, Q16566, O14578, Q9NRD5, P41743, Q13131, O14976
INTERPRO	IPR011009:Protein kinase-like domain	39	8.45987	5.42853e-08	454	62	1574	2.18083	4.93441e-05	2.24496e-05	2.21285e-05	Q8IU85, Q8N568, P25098, Q13555, Q13554, P05129, Q8N5S9, Q9Y3S1, O75962, Q9Y5S2, Q8IWQ3, Q13557, Q9UHD2, P53667, P42345, P17252, P06241, Q96KG9, Q9UEW8, P05771, Q14012, Q8NCB2, Q7KZI7, O15075, O95747, Q02156, Q07002, P53779, Q9UQM7, P42356, Q96RR4, Q8TDC3, O14936, P00533, Q16566, O14578, P41743, Q13131, O14976
UP_KEYWORDS	Serine/threonine-protein kinase	35	7.59219	1.01862e-07	461	54	1604	2.25516	3.19842e-05	6.39695e-06	6.03024e-06	Q8IU85, Q8N568, P25098, Q13555, Q13554, P05129, Q8N5S9, Q9Y3S1, O75962, Q9Y5S2, Q8IWQ3, Q13557, Q9UHD2, P53667, P42345, P11274, P17252, Q9UEW8, P05771, Q14012, Q7KZI7, O15075, O95747, Q02156, Q07002, P53779, Q9UQM7, Q96RR4, Q8TDC3, O14936, Q16566, O14578, P41743, Q13131, O14976
UP_KEYWORDS	Kinase	55	11.9306	3.12228e-07	461	105	1604	1.82254	9.80349e-05	1.2255e-05	1.15525e-05	P25098, Q13555, Q13554, P05129, Q13557, P54619, P32189, P42345, Q9Y6K8, P05771, Q14012, Q7KZI7, Q8TBX8, Q9Y2X7, Q9UQM7, P53779, Q8TDC3, Q9Y3F4, O60331, P23677, P00533, Q16566, Q13131, Q8IU85, Q8N568, P14618, Q8N5S9, Q9Y3S1, O75962, Q9Y5S2, Q8IWQ3, Q9UHD2, P53667, P11274, P17252, P06241, Q15120, Q9UEW8, Q8NCB2, P48426, O15075, Q9NVE7, O95747, P51570, Q02156, Q07002, P42356, Q96RR4, O14936, P17858,…
GOTERM_MF_DIRECT	GO:0004672~protein kinase activity	30	6.50759	2.10706e-06	442	47	1524	2.20083	0.0012908	0.00100294	0.00100294	P25098, Q13554, P05129, Q9Y5S2, Q8IWQ3, P54619, Q9UHD2, P53667, P42345, P17252, Q15120, Q96KG9, Q9UEW8, P05771, Q14012, Q8NCB2, O15075, Q96SB3, Q02156, Q07002, P53779, Q9UQM7, Q8TDC3, O14936, P00533, Q16566, O14578, P41743, Q13131, O14976
UP_SEQ_FEATURE	nucleotide phosphate-binding region:ATP	63	13.6659	3.47557e-06	461	133	1603	1.64711	0.00495083	0.000551843	0.000541031	P25098, Q13555, Q14204, Q13554, P05129, Q13557, P32189, Q7Z4S6, P35579, P35580, Q9Y6G9, Q9Y6K8, Q13085, Q7L2E3, Q92499, Q4G176, Q92614, P05771, Q14012, Q00839, Q7KZI7, Q9UQM7, P53779, Q8TDC3, P22102, P23677, P00533, Q16566, Q15477, Q13131, P46459, Q8IU85, Q8N568, Q8N5S9, Q9Y3S1, O75962, Q9Y5S2, Q8IWQ3, Q9UHD2, Q9Y4I1, P11586, P53667, Q7Z406, A0AVT1, P62333, P17252, P06241, Q15120, Q9UEW8, O00139,…
INTERPRO	IPR017441:Protein kinase, ATP binding site	30	6.50759	3.49262e-06	454	48	1574	2.16685	0.00316976	0.000453541	0.000447055	Q8IU85, Q8N568, P25098, Q13555, Q13554, P05129, Q8N5S9, Q9Y5S2, Q8IWQ3, Q13557, Q9UHD2, P53667, P17252, P06241, Q9UEW8, P05771, Q14012, Q7KZI7, O15075, O95747, Q02156, Q07002, Q9UQM7, Q96RR4, Q8TDC3, P00533, Q16566, O14578, P41743, Q13131
GOTERM_MF_DIRECT	GO:0004674~protein serine/threonine kinase activity	32	6.94143	4.69312e-06	442	53	1524	2.08179	0.00287275	0.00100294	0.00100294	Q8IU85, Q8N568, Q13555, Q13554, Q8N5S9, Q9Y3S1, O75962, Q9Y5S2, Q8IWQ3, Q13557, Q9UHD2, P53667, P42345, P11274, P17252, Q15120, Q9UEW8, P05771, Q14012, Q7KZI7, O15075, O95747, Q02156, Q07002, Q9UQM7, Q96RR4, Q8TDC3, O14936, O14578, P41743, Q13131, O14976
UP_SEQ_FEATURE	active site:Proton acceptor	47	10.1952	4.89608e-06	461	91	1603	1.79593	0.00696724	0.000636046	0.000623583	Q8IU85, Q8N568, P25098, Q13555, Q13554, P05129, Q8N5S9, Q9Y3S1, Q9Y5S2, Q8IWQ3, Q13557, P51649, Q9UHD2, Q53GQ0, Q02338, Q8IXJ6, P05091, P17252, P31040, P06241, Q9UEW8, P49419, P05771, Q14012, Q7KZI7, O15075, P09417, O95747, Q02156, Q07002, Q6IAN0, P53779, Q9UQM7, Q96RR4, Q8TDC3, P17858, P00338, P09543, P04075, P00533, Q16566, P08237, Q01813, O14578, P41743, Q13131, O14976
UP_KEYWORDS	ATP-binding	97	21.0412	7.60142e-06	461	234	1604	1.44231	0.00238401	0.000198904	0.000187502	Q14204, P54619, Q9Y3I0, P42345, Q9Y6G9, P41252, Q13085, Q7L2E3, Q92614, Q00839, Q7Z7E8, Q8TBX8, P53779, Q8TDC3, O60331, P22102, P23677, P49368, P00533, Q13131, Q9HD20, Q8N568, Q9Y3S1, Q8IWQ3, P53667, A0AVT1, P11274, P17252, P06241, Q9Y2Z4, P48426, O95747, O43301, Q9NQX3, O00571, Q02156, Q96RR4, P17812, P49588, O14578, P41743, O14976, Q13555, P25098, Q13554, Q9NSD9, P05129, P54652, O95757, Q13557,…
INTERPRO	IPR008271:Serine/threonine-protein kinase, active site	28	6.07375	1.6578e-05	454	46	1574	2.11032	0.0149565	0.00150694	0.00148539	Q8IU85, Q8N568, P25098, Q13555, Q13554, P05129, Q8N5S9, Q9Y3S1, O75962, Q9Y5S2, Q8IWQ3, Q13557, P17252, P05771, Q14012, Q7KZI7, O15075, Q02156, Q07002, P53779, Q9UQM7, Q96RR4, Q8TDC3, Q16566, O14578, P41743, Q13131, O14976
UP_SEQ_FEATURE	binding site:ATP	43	9.32755	2.70703e-05	461	85	1603	1.75907	0.0379193	0.00257683	0.00252634	Q8IU85, Q8N568, P25098, Q13555, Q13554, P05129, Q8N5S9, Q9Y3S1, O75962, Q9Y5S2, Q8IWQ3, Q13557, P32189, Q9UHD2, P53667, Q96RQ3, P41252, P17252, P06241, Q15120, Q4G176, Q9UEW8, Q9NSE4, P05771, Q14012, Q9Y2Z4, Q7KZI7, O15075, O95747, Q02156, Q07002, P53779, Q9UQM7, P11498, Q96RR4, Q8TDC3, O14936, P23677, P00533, Q16566, O14578, P41743, Q13131
GOTERM_MF_DIRECT	GO:0005524~ATP binding	101	21.9089	5.71973e-05	442	254	1524	1.37104	0.0344554	0.00438275	0.00438275	Q14204, P54619, Q9NS86, Q9Y3I0, P42345, Q9Y6G9, P41252, Q13085, Q7L2E3, Q96KG9, Q92614, Q00839, Q7Z7E8, Q8TBX8, P53779, Q8TDC3, O60331, P22102, P23677, P49368, P00533, Q13131, Q9HD20, Q8N568, Q9Y3S1, Q8IWQ3, P53667, A0AVT1, P11274, P17252, P06241, Q9Y2Z4, Q8NCB2, P48426, O95747, O43301, Q9NQX3, O00571, Q02156, Q96RR4, P17812, P49588, O14578, P41743, O14976, Q13555, P25098, Q13554, Q9NSD9, P05129,…
SMART	SM00220:S_TKc	32	6.94143	0.000127557	284	51	797	1.76084	0.023697	0.00479615	0.00471962	Q8IU85, Q8N568, P25098, Q13555, Q13554, P05129, Q8N5S9, Q9Y3S1, O75962, Q9Y5S2, Q8IWQ3, Q13557, Q9UHD2, P17252, Q9UEW8, P05771, Q14012, Q8NCB2, Q7KZI7, O15075, O95747, Q02156, Q07002, P53779, Q9UQM7, Q96RR4, Q8TDC3, Q16566, O14578, P41743, Q13131, O14976
GOTERM_BP_DIRECT	GO:0035556~intracellular signal transduction	28	6.07375	0.000178284	441	51	1536	1.91223	0.32	0.0771255	0.0771255	Q08462, Q8N568, Q9UPR0, P05129, Q9Y3S1, Q9Y5S2, Q9Y4G8, P11274, P17252, P06241, Q9UEW8, P05771, Q14155, Q92974, Q7KZI7, O15075, O95747, Q9UPW8, O00571, Q02156, Q12979, Q9Y6D5, Q8TDC3, Q9NZ56, Q16566, O14578, P41743, Q13131
UP_KEYWORDS	Transferase	68	14.7505	0.000519386	461	167	1604	1.41676	0.150519	0.00906039	0.00854101	P25098, Q13555, Q13554, P05129, Q13557, P54619, P32189, P42345, O75390, P00505, Q96PU5, Q9Y6K8, P05771, Q147X3, Q14012, Q7Z7E8, O15294, Q7KZI7, Q8TBX8, Q5SQI0, Q9Y2X7, Q9UQM7, P53779, Q8TDC3, Q9Y3F4, O60331, P22102, P23677, P00533, Q16566, Q13131, Q8IU85, Q8N568, P14618, Q8N5S9, Q9Y3S1, O75962, Q9Y5S2, Q8IWQ3, Q9UHD2, P53667, P11274, P17252, P17174, P06241, Q15120, Q9UEW8, Q8NCB2, P48426, Q9H4B0,…
UP_KEYWORDS	Nucleotide-binding	120	26.0304	0.00132295	461	335	1604	1.24635	0.340109	0.0218634	0.0206101	Q14204, P54619, Q9P0V9, Q9Y3I0, Q99490, P42345, Q9Y6G9, P41252, Q13085, Q7L2E3, Q92614, Q00839, Q7Z7E8, Q8TBX8, P49411, P53779, P84095, Q9BUF5, Q8TDC3, P68104, O60331, P22102, P23677, P49368, P00533, Q13131, Q9HD20, Q8N568, Q9Y3S1, Q8IWQ3, P53667, A0AVT1, P11274, Q9NY65, P17252, P06241, Q9Y2Z4, P48426, O95747, O43301, Q9NQX3, O00571, Q02156, P68371, Q96RR4, P17812, P68366, P04350, P49588, O14578,…
GOTERM_BP_DIRECT	GO:0018105~peptidyl-serine phosphorylation	16	3.47072	0.00280617	441	27	1536	2.064	0.997708	0.606975	0.606975	O15075, Q8N568, P25098, P05129, Q8IWQ3, Q13557, Q9UHD2, Q02156, Q9UQM7, P42345, P17252, Q15120, Q9UEW8, Q16566, P05771, P41743
Annotation Cluster 4	Enrichment Score: 4.509117214997135
Category	Term	Count	%	PValue	List Total	Pop Hits	Pop Total	Fold Enrichment	Bonferroni	Benjamini	FDR	Uniprot Accession #
INTERPRO	IPR001478:PDZ domain	22	4.77223	2.78738e-06	454	30	1574	2.54244	0.00253052	0.000423436	0.00041738	Q15700, Q96L92, Q8N3R9, Q13884, Q96SB3, Q12959, Q5T5U3, Q09666, Q07157, Q9ULJ8, Q86UR5, P53667, Q8IVF2, Q9Y4G8, Q00013, O14936, Q02410, P55196, Q9Y6V0, P78352, Q92614, Q9NRD5
SMART	SM00228:PDZ	22	4.77223	9.46505e-05	284	30	797	2.05798	0.0176377	0.00444857	0.00437759	Q15700, Q96L92, Q8N3R9, Q13884, Q96SB3, Q12959, Q5T5U3, Q09666, Q07157, Q9ULJ8, Q86UR5, P53667, Q8IVF2, Q9Y4G8, Q00013, O14936, Q02410, P55196, Q9Y6V0, P78352, Q92614, Q9NRD5
UP_SEQ_FEATURE	domain:PDZ	17	3.68764	0.000112546	461	24	1603	2.46303	0.148473	0.00946046	0.00927509	Q96L92, Q8N3R9, Q13884, Q96SB3, Q5T5U3, Q09666, Q9ULJ8, Q86UR5, P53667, Q8IVF2, Q9Y4G8, Q00013, O14936, P55196, Q9Y6V0, Q92614, Q9NRD5
Annotation Cluster 5	Enrichment Score: 2.9080104866534757
Category	Term	Count	%	PValue	List Total	Pop Hits	Pop Total	Fold Enrichment	Bonferroni	Benjamini	FDR	Uniprot Accession #
GOTERM_BP_DIRECT	GO:0051056~regulation of small GTPase mediated signal transduction	20	4.33839	6.9204e-05	441	30	1536	2.322	0.139028	0.0374221	0.0374221	P50395, O43295, Q6GYQ0, O75962, Q9NRY4, Q12979, Q684P5, O75044, Q8IXI2, P84095, O14827, P11274, Q9UNA1, A7KAX9, Q9C0H5, Q17R89, P49815, P47736, Q14155, Q92974
INTERPRO	IPR008936:Rho GTPase activation protein	13	2.81996	0.000399894	454	17	1574	2.6512	0.304815	0.0259646	0.0255932	O43295, Q9NRY4, Q5T5U3, Q96PV0, Q9UJF2, Q12979, O75044, Q14C86, P11274, Q9UNA1, A7KAX9, Q9C0H5, Q17R89
UP_SEQ_FEATURE	domain:Rho-GAP	10	2.1692	0.00276976	461	13	1603	2.67479	0.98095	0.119939	0.117589	Q9UNA1, P11274, O43295, Q9NRY4, Q9C0H5, A7KAX9, Q5T5U3, Q17R89, Q12979, O75044
INTERPRO	IPR000198:Rho GTPase-activating protein domain	10	2.1692	0.00283081	454	13	1574	2.66689	0.923987	0.140441	0.138432	Q9UNA1, P11274, O43295, Q9NRY4, Q9C0H5, A7KAX9, Q5T5U3, Q17R89, Q12979, O75044
SMART	SM00324:RhoGAP	10	2.1692	0.0132898	284	13	797	2.15872	0.919156	0.356926	0.351231	Q9UNA1, P11274, O43295, Q9NRY4, Q9C0H5, A7KAX9, Q5T5U3, Q17R89, Q12979, O75044
Annotation Cluster 6	Enrichment Score: 2.900589442989117
Category	Term	Count	%	PValue	List Total	Pop Hits	Pop Total	Fold Enrichment	Bonferroni	Benjamini	FDR	Uniprot Accession #
GOTERM_CC_DIRECT	GO:0014069~postsynaptic density	36	7.80911	8.19595e-05	454	70	1590	1.80113	0.0363694	0.0159578	0.0158166	O14490, Q6X4W1, Q13555, Q14643, P05129, O75146, Q96PV0, O43815, O75044, Q9ULJ8, P12036, P11274, Q86YM7, A7KAX9, P06241, Q9UQB8, Q7Z6G8, Q9Y6V0, P78352, P46821, Q92974, O95886, Q08495, Q15700, O15075, Q96SB3, Q12959, Q01082, Q9UQM7, Q9UPA5, P27816, Q8N3V7, Q9C0H9, Q9NRD5, Q9P1A6, P46459
UP_KEYWORDS	Cell junction	69	14.9675	9.05987e-05	461	162	1604	1.48196	0.0280484	0.00206574	0.00194732	Q5TCZ1, P05129, P12814, Q07157, Q9ULJ8, O43759, P16389, Q9Y4G8, P42263, P42262, Q9Y4G6, P55196, Q7Z6G8, P78352, Q13045, P46821, O75508, Q92974, O95886, Q15700, Q15149, Q13884, Q05084, Q96SB3, Q5SQI0, Q12955, Q9UPW8, Q5T442, Q12959, Q01484, Q9UQM7, Q86UR5, Q9Y6D5, Q8TDC3, O60331, Q17R89, Q9NRD5, Q9P1A6, O14490, Q6X4W1, Q9Y5S2, Q674X7, Q9P0L0, O75044, P11274, Q86UE4, Q86YM7, Q9UQB3, Q8TDJ6, A7KAX9,…
GOTERM_CC_DIRECT	GO:0045211~postsynaptic membrane	25	5.42299	0.000328006	454	45	1590	1.94567	0.137813	0.0370647	0.0367367	O14490, Q6X4W1, O43815, O75044, P11274, Q86YM7, P42263, P42262, A7KAX9, Q7Z6G8, P78352, Q68DU8, O95886, Q15700, Q12955, Q8NF91, Q9NQX3, Q12959, Q01484, P60484, Q13492, Q8N3V7, Q9C0H9, Q9NRD5, Q9P1A6
UP_KEYWORDS	Postsynaptic cell membrane	21	4.55531	0.00215996	461	39	1604	1.87352	0.492856	0.0322965	0.0304451	O14490, O95886, Q15700, Q6X4W1, Q12955, Q9NQX3, Q12959, Q01484, O75044, P11274, Q86YM7, P42263, P42262, A7KAX9, Q7Z6G8, P78352, Q8N3V7, Q9C0H9, Q9NRD5, Q9P1A6, Q68DU8
GOTERM_CC_DIRECT	GO:0030054~cell junction	43	9.32755	0.0204203	454	112	1590	1.3446	0.999911	0.68502	0.678958	O14490, Q5TCZ1, Q6X4W1, O15020, O75044, Q07157, Q9ULJ8, O43759, P16389, P11274, Q86YM7, P42263, P42262, Q8TDJ6, A7KAX9, P55196, Q7Z6G8, Q9Y6V0, P78352, P46821, Q68DU8, O95886, Q15700, Q05084, O15079, Q9NQX3, Q9UPW8, Q7L099, Q12959, Q5T5U3, P35222, Q9Y4F1, Q9UQM7, Q86UR5, Q9Y6D5, Q8TDC3, Q9UPA5, Q17R89, Q9C0D0, Q9C0H9, Q66K74, Q9NRD5, Q9P1A6
UP_KEYWORDS	Synapse	42	9.11063	0.036758	461	112	1604	1.30477	0.999992	0.371329	0.350043	O14490, Q6X4W1, P05129, O75044, Q9ULJ8, O43759, P16389, P11274, Q86YM7, P42263, P42262, Q9Y4G6, Q8TDJ6, A7KAX9, Q7Z6G8, Q9Y6V0, P78352, P46821, Q92558, Q68DU8, O95886, Q15700, Q96SB3, Q05084, O15079, Q12955, Q9NQX3, Q9UPW8, Q12959, Q01484, Q9Y4F1, Q9UQM7, Q86UR5, Q9Y6D5, Q8TDC3, Q9UPA5, Q17R89, Q9C0D0, Q8N3V7, Q9C0H9, Q9NRD5, Q9P1A6
Annotation Cluster 7	Enrichment Score: 2.6266164191571097
Category	Term	Count	%	PValue	List Total	Pop Hits	Pop Total	Fold Enrichment	Bonferroni	Benjamini	FDR	Uniprot Accession #
UP_SEQ_FEATURE	repeat:Spectrin 2	13	2.81996	2.70519e-06	461	13	1603	3.47722	0.00385557	0.000483215	0.000473747	O15020, Q15149, Q13813, Q8NF91, O75962, P35609, P12814, Q03001, Q9UPN3, Q01082, Q9H254, P11277, O43707
UP_SEQ_FEATURE	repeat:Spectrin 3	13	2.81996	2.70519e-06	461	13	1603	3.47722	0.00385557	0.000483215	0.000473747	O15020, Q15149, Q13813, Q8NF91, O75962, P35609, P12814, Q03001, Q9UPN3, Q01082, Q9H254, P11277, O43707
UP_SEQ_FEATURE	repeat:Spectrin 4	13	2.81996	2.70519e-06	461	13	1603	3.47722	0.00385557	0.000483215	0.000473747	O15020, Q15149, Q13813, Q8NF91, O75962, P35609, P12814, Q03001, Q9UPN3, Q01082, Q9H254, P11277, O43707
UP_SEQ_FEATURE	repeat:Spectrin 1	13	2.81996	2.70519e-06	461	13	1603	3.47722	0.00385557	0.000483215	0.000473747	O15020, Q15149, Q13813, Q8NF91, O75962, P35609, P12814, Q03001, Q9UPN3, Q01082, Q9H254, P11277, O43707
INTERPRO	IPR018159:Spectrin/alpha-actinin	13	2.81996	2.79496e-06	454	13	1574	3.46696	0.00253739	0.000423436	0.00041738	O15020, Q15149, Q13813, Q8NF91, O75962, P35609, P12814, Q03001, Q9UPN3, Q01082, Q9H254, P11277, O43707
INTERPRO	IPR002017:Spectrin repeat	12	2.60304	9.14039e-06	454	12	1574	3.46696	0.00827423	0.000923179	0.000909977	O15020, O43707, Q13813, Q8NF91, O75962, P35609, P12814, Q03001, Q01082, Q9UPN3, Q9H254, P11277
INTERPRO	IPR001715:Calponin homology domain	15	3.2538	2.09777e-05	454	18	1574	2.88913	0.0188882	0.00173352	0.00170873	Q9UPQ0, O15020, Q15149, Q15555, Q8NF91, P35609, P12814, Q7RTP6, Q03001, Q9UPN3, Q01082, Q9H254, P11277, O43707, Q14155
UP_SEQ_FEATURE	domain:Actin-binding	11	2.38612	2.88518e-05	461	11	1603	3.47722	0.0403638	0.00257683	0.00252634	O15020, Q15149, O43707, Q8NF91, P35609, P12814, Q03001, Q01082, Q9UPN3, Q9H254, P11277
UP_SEQ_FEATURE	domain:CH 1	11	2.38612	2.88518e-05	461	11	1603	3.47722	0.0403638	0.00257683	0.00252634	O15020, Q15149, O43707, Q8NF91, P35609, P12814, Q03001, Q01082, Q9UPN3, Q9H254, P11277
UP_SEQ_FEATURE	domain:CH 2	11	2.38612	2.88518e-05	461	11	1603	3.47722	0.0403638	0.00257683	0.00252634	O15020, Q15149, O43707, Q8NF91, P35609, P12814, Q03001, Q01082, Q9UPN3, Q9H254, P11277
INTERPRO	IPR001589:Actinin-type, actin-binding, conserved site	11	2.38612	2.96497e-05	454	11	1574	3.46696	0.026592	0.0020732	0.00204355	O15020, Q15149, O43707, Q8NF91, P35609, P12814, Q03001, Q01082, Q9UPN3, Q9H254, P11277
SMART	SM00150:SPEC	13	2.81996	3.05277e-05	284	13	797	2.80634	0.00572285	0.0028696	0.00282381	O15020, Q15149, Q13813, Q8NF91, O75962, P35609, P12814, Q03001, Q9UPN3, Q01082, Q9H254, P11277, O43707
SMART	SM00033:CH	14	3.03688	5.78396e-05	284	15	797	2.61925	0.0108153	0.00362462	0.00356678	Q9UPQ0, O15020, Q15149, Q8NF91, P35609, P12814, Q7RTP6, Q03001, Q9UPN3, Q01082, Q9H254, P11277, O43707, Q14155
UP_SEQ_FEATURE	repeat:Spectrin 15	8	1.73536	0.000932501	461	8	1603	3.47722	0.736113	0.041642	0.0408261	O15020, Q13813, Q8NF91, Q03001, Q01082, Q9UPN3, Q9H254, P11277
UP_SEQ_FEATURE	repeat:Spectrin 16	8	1.73536	0.000932501	461	8	1603	3.47722	0.736113	0.041642	0.0408261	O15020, Q13813, Q8NF91, Q03001, Q01082, Q9UPN3, Q9H254, P11277
UP_SEQ_FEATURE	repeat:Spectrin 17	8	1.73536	0.000932501	461	8	1603	3.47722	0.736113	0.041642	0.0408261	O15020, Q13813, Q8NF91, Q03001, Q01082, Q9UPN3, Q9H254, P11277
UP_SEQ_FEATURE	repeat:Spectrin 5	8	1.73536	0.000932501	461	8	1603	3.47722	0.736113	0.041642	0.0408261	O15020, Q13813, Q8NF91, Q03001, Q01082, Q9UPN3, Q9H254, P11277
UP_SEQ_FEATURE	repeat:Spectrin 6	8	1.73536	0.000932501	461	8	1603	3.47722	0.736113	0.041642	0.0408261	O15020, Q13813, Q8NF91, Q03001, Q01082, Q9UPN3, Q9H254, P11277
UP_SEQ_FEATURE	repeat:Spectrin 7	8	1.73536	0.000932501	461	8	1603	3.47722	0.736113	0.041642	0.0408261	O15020, Q13813, Q8NF91, Q03001, Q01082, Q9UPN3, Q9H254, P11277
UP_SEQ_FEATURE	repeat:Spectrin 8	8	1.73536	0.000932501	461	8	1603	3.47722	0.736113	0.041642	0.0408261	O15020, Q13813, Q8NF91, Q03001, Q01082, Q9UPN3, Q9H254, P11277
UP_SEQ_FEATURE	repeat:Spectrin 9	8	1.73536	0.000932501	461	8	1603	3.47722	0.736113	0.041642	0.0408261	O15020, Q13813, Q8NF91, Q03001, Q01082, Q9UPN3, Q9H254, P11277
UP_SEQ_FEATURE	repeat:Spectrin 10	8	1.73536	0.000932501	461	8	1603	3.47722	0.736113	0.041642	0.0408261	O15020, Q13813, Q8NF91, Q03001, Q01082, Q9UPN3, Q9H254, P11277
UP_SEQ_FEATURE	repeat:Spectrin 11	8	1.73536	0.000932501	461	8	1603	3.47722	0.736113	0.041642	0.0408261	O15020, Q13813, Q8NF91, Q03001, Q01082, Q9UPN3, Q9H254, P11277
UP_SEQ_FEATURE	repeat:Spectrin 12	8	1.73536	0.000932501	461	8	1603	3.47722	0.736113	0.041642	0.0408261	O15020, Q13813, Q8NF91, Q03001, Q01082, Q9UPN3, Q9H254, P11277
UP_SEQ_FEATURE	repeat:Spectrin 13	8	1.73536	0.000932501	461	8	1603	3.47722	0.736113	0.041642	0.0408261	O15020, Q13813, Q8NF91, Q03001, Q01082, Q9UPN3, Q9H254, P11277
UP_SEQ_FEATURE	repeat:Spectrin 14	8	1.73536	0.000932501	461	8	1603	3.47722	0.736113	0.041642	0.0408261	O15020, Q13813, Q8NF91, Q03001, Q01082, Q9UPN3, Q9H254, P11277
GOTERM_BP_DIRECT	GO:0051693~actin filament capping	6	1.30152	0.0232746	441	7	1536	2.98542	1	1	1	Q08495, O15020, Q13813, Q01082, Q9H254, P11277
UP_SEQ_FEATURE	repeat:Spectrin 18	5	1.0846	0.025927	461	5	1603	3.47722	1	0.86162	0.844737	Q13813, Q8NF91, Q03001, Q9UPN3, Q9H254
UP_KEYWORDS	Actin capping	7	1.51844	0.0378425	461	10	1604	2.43557	0.999995	0.371329	0.350043	Q08495, O15020, Q13813, Q01082, Q9H254, P47756, P11277
GOTERM_CC_DIRECT	GO:0008091~spectrin	5	1.0846	0.0587755	454	6	1590	2.9185	1	1	0.993348	O15020, Q13813, Q01082, Q9H254, P11277
PIR_SUPERFAMILY	PIRSF002297:spectrin, beta subunit	4	0.867679	0.0602984	62	4	227	3.66129	0.955383	1	1	O15020, Q01082, Q9H254, P11277
GOTERM_CC_DIRECT	GO:0014731~spectrin-associated cytoskeleton	4	0.867679	0.0724871	454	4	1590	3.5022	1	1	0.993348	Q08495, Q12955, Q01082, P11277
UP_SEQ_FEATURE	repeat:Spectrin 19	4	0.867679	0.0739282	461	4	1603	3.47722	1	1	0.981092	Q13813, Q8NF91, Q03001, Q9UPN3
UP_SEQ_FEATURE	repeat:Spectrin 20	4	0.867679	0.0739282	461	4	1603	3.47722	1	1	0.981092	Q13813, Q8NF91, Q03001, Q9UPN3
UP_SEQ_FEATURE	repeat:Spectrin 21	4	0.867679	0.0739282	461	4	1603	3.47722	1	1	0.981092	Q13813, Q8NF91, Q03001, Q9UPN3
UP_SEQ_FEATURE	repeat:Spectrin 22	4	0.867679	0.0739282	461	4	1603	3.47722	1	1	0.981092	Q13813, Q8NF91, Q03001, Q9UPN3
UP_SEQ_FEATURE	repeat:Spectrin 23	4	0.867679	0.0739282	461	4	1603	3.47722	1	1	0.981092	Q13813, Q8NF91, Q03001, Q9UPN3
INTERPRO	IPR016343:Spectrin, beta subunit	4	0.867679	0.0745161	454	4	1574	3.46696	1	1	0.986784	O15020, Q01082, Q9H254, P11277
INTERPRO	IPR001605:Pleckstrin homology domain, spectrin-type	4	0.867679	0.146981	454	5	1574	2.77357	1	1	0.986784	O15020, Q01082, Q9H254, P11277
GOTERM_MF_DIRECT	GO:0030506~ankyrin binding	4	0.867679	0.148953	442	5	1524	2.75837	1	1	1	Q15149, Q01082, Q9H254, P11277
GOTERM_MF_DIRECT	GO:0005543~phospholipid binding	9	1.95228	0.194993	442	20	1524	1.55158	1	1	1	O15020, Q9UNA1, P00505, Q9NRY4, Q17R89, Q01082, Q9H254, P41743, P11277
UP_SEQ_FEATURE	repeat:Spectrin 24	3	0.650759	0.199617	461	3	1603	3.47722	1	1	0.981092	Q8NF91, Q03001, Q9UPN3
UP_SEQ_FEATURE	repeat:Spectrin 25	3	0.650759	0.199617	461	3	1603	3.47722	1	1	0.981092	Q8NF91, Q03001, Q9UPN3
UP_SEQ_FEATURE	repeat:Spectrin 26	3	0.650759	0.199617	461	3	1603	3.47722	1	1	0.981092	Q8NF91, Q03001, Q9UPN3
UP_SEQ_FEATURE	repeat:Spectrin 27	3	0.650759	0.199617	461	3	1603	3.47722	1	1	0.981092	Q8NF91, Q03001, Q9UPN3
UP_SEQ_FEATURE	repeat:Spectrin 28	3	0.650759	0.199617	461	3	1603	3.47722	1	1	0.981092	Q8NF91, Q03001, Q9UPN3
UP_SEQ_FEATURE	repeat:Spectrin 29	3	0.650759	0.199617	461	3	1603	3.47722	1	1	0.981092	Q8NF91, Q03001, Q9UPN3
GOTERM_BP_DIRECT	GO:0007411~axon guidance	11	2.38612	0.22051	441	27	1536	1.419	1	1	1	P35580, O15020, Q13813, Q12955, O94856, Q9NRY4, P06241, Q01082, Q9H254, Q9BPU6, P11277
Annotation Cluster 8	Enrichment Score: 2.1636991989619476
Category	Term	Count	%	PValue	List Total	Pop Hits	Pop Total	Fold Enrichment	Bonferroni	Benjamini	FDR	Uniprot Accession #
UP_SEQ_FEATURE	domain:SH3	23	4.98915	0.000225168	461	39	1603	2.05067	0.274994	0.0178758	0.0175256	Q8N1I0, O00305, Q15700, Q8N3R9, O43295, Q13813, Q12959, Q03001, Q9UPN3, Q8WXD9, Q9ULH1, Q07157, O75044, Q00013, Q9UNA1, O14936, O60861, Q9NZQ3, P06241, A7KAX9, Q9UQB8, P78352, Q14155
UP_KEYWORDS	SH3 domain	25	5.42299	0.000366855	461	45	1604	1.933	0.108824	0.00677603	0.00638759	Q8N1I0, O00305, Q5TCZ1, O43295, Q13813, O75962, Q9UPN3, Q9ULH1, O75044, Q07157, Q00013, O60861, Q9NZQ3, A7KAX9, P06241, Q9UQB8, P78352, Q14155, Q15700, Q8N3R9, Q12959, Q03001, Q8WXD9, Q9UNA1, O14936
INTERPRO	IPR001452:Src homology-3 domain	23	4.98915	0.00142264	454	43	1574	1.85442	0.725855	0.0862119	0.0849789	Q8N1I0, Q5TCZ1, O00305, Q15700, Q8N3R9, O43295, Q13813, O75962, Q12959, Q8WXD9, Q9ULH1, Q07157, O75044, Q00013, Q9UNA1, O14936, O60861, Q9NZQ3, P06241, A7KAX9, Q9UQB8, P78352, Q14155
INTERPRO	IPR008145:Guanylate kinase/L-type calcium channel	8	1.73536	0.0304266	454	12	1574	2.31131	1	0.987779	0.973653	O00305, Q15700, Q00013, Q8N3R9, O14936, Q12959, P78352, Q07157
SMART	SM00326:SH3	21	4.55531	0.0381986	284	40	797	1.47333	0.999339	0.718133	0.706673	Q8N1I0, Q5TCZ1, Q15700, Q8N3R9, O43295, Q13813, O75962, Q12959, Q8WXD9, Q9ULH1, O75044, Q00013, Q9UNA1, O14936, O60861, Q9NZQ3, P06241, A7KAX9, Q9UQB8, P78352, Q14155
INTERPRO	IPR011511:Variant SH3	9	1.95228	0.0586945	454	16	1574	1.95017	1	1	0.986784	Q8N1I0, Q15700, Q00013, Q8N3R9, O14936, Q12959, Q8WXD9, Q07157, Q14155
SMART	SM00072:GuKc	8	1.73536	0.0891481	284	12	797	1.87089	1	1	0.989305	O00305, Q15700, Q00013, Q8N3R9, O14936, Q12959, P78352, Q07157
Annotation Cluster 9	Enrichment Score: 1.9942708434341785
Category	Term	Count	%	PValue	List Total	Pop Hits	Pop Total	Fold Enrichment	Bonferroni	Benjamini	FDR	Uniprot Accession #
KEGG_PATHWAY	hsa04510:Focal adhesion	17	3.68764	0.00224545	218	33	876	2.07006	0.392893	0.0646565	0.0620353	Q92529, P05129, P35609, P12814, Q9NRY4, P35222, P53779, O60610, O43707, P60484, P17252, Q9Y4G6, P06241, P24821, P00533, P05771, O14974
KEGG_PATHWAY	hsa04670:Leukocyte transendothelial migration	13	2.81996	0.00232997	218	22	876	2.37448	0.404203	0.0646565	0.0620353	P05129, P35609, P12814, Q9NRY4, P35222, O60716, Q8WZA2, O43707, P63096, P17252, P55196, P05771, O75508
KEGG_PATHWAY	hsa05146:Amoebiasis	6	1.30152	0.198854	218	13	876	1.85462	1	0.919701	0.882416	O43707, P05129, P35609, P17252, P12814, P05771
Annotation Cluster 10	Enrichment Score: 1.9095284795534107
Category	Term	Count	%	PValue	List Total	Pop Hits	Pop Total	Fold Enrichment	Bonferroni	Benjamini	FDR	Uniprot Accession #
INTERPRO	IPR000008:C2 calcium-dependent membrane targeting	22	4.77223	0.00179285	454	41	1574	1.86032	0.804298	0.101856	0.100399	Q96A23, O95741, Q9UPR0, P05129, Q6DN14, Q96PE3, Q9UPW8, Q86YS7, Q96PV0, Q9UJF2, Q02156, Q12979, Q86UR5, P11274, P60484, P17252, Q96PU5, Q5T0F9, Q9Y6V0, P05771, O14523, O14976
UP_SEQ_FEATURE	domain:C2	13	2.81996	0.0143683	461	23	1603	1.96539	1	0.57034	0.559165	Q9UPR0, P05129, Q96PE3, Q86YS7, Q96PV0, Q9UJF2, Q02156, Q12979, P11274, P17252, Q96PU5, Q5T0F9, P05771
SMART	SM00239:C2	18	3.90456	0.0725216	284	35	797	1.44326	0.999999	1	0.989305	Q96A23, O95741, Q9UPR0, P05129, Q6DN14, Q9UPW8, Q86YS7, Q96PV0, Q9UJF2, Q02156, Q12979, Q86UR5, P11274, P17252, Q96PU5, Q5T0F9, Q9Y6V0, P05771
Annotation Cluster 11	Enrichment Score: 1.7957568504674015
Category	Term	Count	%	PValue	List Total	Pop Hits	Pop Total	Fold Enrichment	Bonferroni	Benjamini	FDR	Uniprot Accession #
UP_KEYWORDS	Developmental protein	23	4.98915	0.010311	461	49	1604	1.63318	0.961398	0.140767	0.132698	Q7KZI7, O15075, Q13555, O00139, Q13554, P36969, Q96SB3, Q92736, Q7L099, Q9Y4F1, A6NGB9, Q9ULJ8, Q9Y4G8, O60861, Q9NZ56, Q9UQB3, P06241, O94967, P00533, Q13045, O14578, Q14012, Q16352
UP_KEYWORDS	NeuroUniprot Accession #is	20	4.33839	0.0112799	461	41	1604	1.69726	0.971618	0.147579	0.139119	Q8IU85, O15075, Q13555, O00139, Q13554, Q96SB3, Q8IWQ3, Q7L099, P35222, O75044, Q9ULJ8, Q9Y4G8, Q8IXJ6, Q8TDC3, O60861, P60484, O14578, Q14155, Q14012, Q16352
UP_KEYWORDS	Differentiation	22	4.77223	0.0352472	461	51	1604	1.50091	0.999987	0.368921	0.347773	Q7KZI7, O15075, Q13555, O00139, Q13554, O95741, P54652, Q96SB3, Q9UPW8, Q7L099, A6NGB9, Q9ULJ8, Q86UR5, Q9Y4G8, Q8IXJ6, O60861, Q96PU5, P46379, O14578, Q96Q05, Q14012, Q16352
Annotation Cluster 12	Enrichment Score: 1.7701033818454017
Category	Term	Count	%	PValue	List Total	Pop Hits	Pop Total	Fold Enrichment	Bonferroni	Benjamini	FDR	Uniprot Accession #
UP_KEYWORDS	Calmodulin-binding	28	6.07375	2.49101e-06	461	43	1604	2.26565	0.000781871	7.90302e-05	7.44998e-05	Q8IU85, Q13555, Q13554, Q92736, Q13813, Q8N5S9, Q96JE9, Q13557, O43815, Q07157, P35579, Q9Y4I1, Q7Z406, P35580, O14827, Q9H9H5, Q14012, Q8NCB2, Q13884, Q5T4S7, P11137, Q01082, Q9UQM7, Q96RR4, O14936, P23677, Q16566, Q13033
UP_SEQ_FEATURE	region of interest:Calmodulin-binding	17	3.68764	2.50195e-06	461	20	1603	2.95564	0.00356642	0.000483215	0.000473747	Q8IU85, Q13555, Q13554, Q13884, Q92736, Q96JE9, Q8N5S9, Q13557, P11137, Q9UQM7, O43815, Q96RR4, O14936, P23677, Q16566, Q14012, Q13033
GOTERM_MF_DIRECT	GO:0005516~calmodulin binding	31	6.72451	5.74174e-06	442	51	1524	2.09582	0.00351351	0.00100294	0.00100294	Q8IU85, Q13555, Q13554, Q92736, Q13813, Q8N5S9, Q96JE9, Q13557, O43815, Q07157, P35579, Q9Y4I1, Q7Z406, P35580, O14827, Q9H9H5, Q14012, Q8NCB2, Q13884, Q5T4S7, Q9UPW8, P11137, O76024, Q01082, Q9UQM7, Q96RR4, O14936, P23677, P00533, Q16566, Q13033
INTERPRO	IPR020636:Calcium/calmodulin-dependent/calcium-dependent protein kinase	11	2.38612	2.96497e-05	454	11	1574	3.46696	0.026592	0.0020732	0.00204355	Q8IU85, O15075, Q13555, Q8N568, Q13554, Q96RR4, Q8N5S9, Q13557, Q9UQM7, Q8NCB2, Q14012
GOTERM_MF_DIRECT	GO:0004683~calmodulin-dependent protein kinase activity	10	2.1692	9.97427e-05	442	10	1524	3.44796	0.0593135	0.00679358	0.00679358	Q8IU85, Q13555, Q13554, Q96RR4, Q8N5S9, Q13557, P23677, Q16566, Q9UQM7, Q14012
KEGG_PATHWAY	hsa04921:Oxytocin signaling pathway	22	4.77223	0.000103613	218	40	876	2.21009	0.0227407	0.0198145	0.0190112	Q08462, O00305, Q8IU85, Q13555, Q13554, Q14643, P05129, Q92736, Q8N5S9, Q13557, P54619, Q9UQM7, Q96RR4, P63096, P60660, P17252, P00533, Q16566, P05771, O14974, Q14012, Q13131
KEGG_PATHWAY	hsa04925:Aldosterone synthesis and secretion	13	2.81996	0.000178509	218	18	876	2.90214	0.0388575	0.0198145	0.0190112	Q08462, Q8IU85, Q13555, Q13554, Q14643, P05129, Q13557, Q02156, Q9UQM7, P17252, Q16566, P05771, Q14012
KEGG_PATHWAY	hsa05214:Glioma	11	2.38612	0.0013747	218	16	876	2.76261	0.263166	0.0610365	0.058562	Q13555, P42345, Q92529, Q13554, P05129, P60484, P17252, Q13557, P00533, P05771, Q9UQM7
KEGG_PATHWAY	hsa04750:Inflammatory mediator regulation of TRP channels	11	2.38612	0.0013747	218	16	876	2.76261	0.263166	0.0610365	0.058562	Q08462, Q13555, Q13554, Q14643, P05129, P17252, Q13557, Q02156, P53779, P05771, Q9UQM7
BIOCARTA	h_CaCaMPathway:Ca++/ Calmodulin-dependent Protein Kinase Activation	8	1.73536	0.00363536	80	9	264	2.93333	0.383923	0.483503	0.483503	Q13555, Q13554, Q96RR4, Q8N5S9, Q13557, Q16566, Q9UQM7, Q14012
KEGG_PATHWAY	hsa04713:Circadian entrainment	13	2.81996	0.00597703	218	24	876	2.17661	0.735756	0.120627	0.115737	Q08462, Q13555, Q13554, Q14643, P05129, Q92736, Q13557, Q9UQM7, P63096, P17252, P42263, P42262, P05771
KEGG_PATHWAY	hsa05031:Amphetamine addiction	10	2.1692	0.00652282	218	16	876	2.51147	0.766088	0.120672	0.11578	Q13555, Q13554, P05129, P17252, P42263, Q13557, P42262, Q16566, P05771, Q9UQM7
KEGG_PATHWAY	hsa04012:ErbB signaling pathway	11	2.38612	0.0120674	218	20	876	2.21009	0.932475	0.181529	0.17417	Q13555, P42345, Q92529, Q13554, P05129, P17252, Q13557, P00533, P53779, P05771, Q9UQM7
KEGG_PATHWAY	hsa04725:Cholinergic synapse	12	2.60304	0.0127678	218	23	876	2.09653	0.942311	0.181529	0.17417	Q08462, Q13555, Q13554, Q14643, P05129, P63096, P17252, Q13557, P06241, Q16566, P05771, Q9UQM7
KEGG_PATHWAY	hsa05205:Proteoglycans in cancer	15	3.2538	0.0130832	218	32	876	1.8836	0.946262	0.181529	0.17417	Q13555, Q13554, Q14643, P05129, Q12955, Q13557, Q01484, P35222, Q9UQM7, P42345, P17252, P00533, P05771, O14974, P40763
GOTERM_BP_DIRECT	GO:0046777~protein autophosphorylation	13	2.81996	0.0141335	441	23	1536	1.96865	1	1	1	Q7KZI7, Q13555, Q13554, P05129, Q9Y3S1, Q13557, Q9UQM7, P42345, P11274, Q96RR4, Q9UEW8, P00533, Q16566
GOTERM_BP_DIRECT	GO:0006816~calcium ion transport	9	1.95228	0.0233672	441	14	1536	2.23907	1	1	1	Q13555, Q14643, Q92736, P30626, Q13557, P06241, P08133, P05771, Q9UQM7
KEGG_PATHWAY	hsa04971:Gastric acid secretion	10	2.1692	0.0257705	218	19	876	2.11492	0.99696	0.252414	0.242181	Q08462, Q13555, Q13554, Q14643, P05129, P63096, P17252, Q13557, P05771, Q9UQM7
UP_SEQ_FEATURE	region of interest:Autoinhibitory domain	5	1.0846	0.025927	461	5	1603	3.47722	1	0.86162	0.844737	Q8IU85, Q96RR4, Q8N5S9, Q16566, Q14012
KEGG_PATHWAY	hsa04911:Insulin secretion	11	2.38612	0.026151	218	22	876	2.00917	0.997213	0.252414	0.242181	Q08462, Q13555, Q13554, Q92736, P05129, P17252, Q13557, Q9Y6V0, P05771, Q8WZA2, Q9UQM7
KEGG_PATHWAY	hsa04922:Glucagon signaling pathway	11	2.38612	0.026151	218	22	876	2.00917	0.997213	0.252414	0.242181	Q08462, Q13555, Q13554, Q14643, P14618, P00338, Q13557, P54619, Q13085, Q9UQM7, Q13131
KEGG_PATHWAY	hsa04720:Long-term potentiation	10	2.1692	0.0369821	218	20	876	2.00917	0.999767	0.31577	0.302969	Q13555, Q13554, Q14643, P05129, P17252, Q13557, P42262, Q16566, P05771, Q9UQM7
KEGG_PATHWAY	hsa04916:Melanogenesis	10	2.1692	0.0369821	218	20	876	2.00917	0.999767	0.31577	0.302969	Q08462, Q13555, Q13554, P05129, P63096, P17252, Q13557, P35222, P05771, Q9UQM7
KEGG_PATHWAY	hsa04024:cAMP signaling pathway	14	3.03688	0.042153	218	33	876	1.70475	0.99993	0.341648	0.327797	Q08462, Q13555, Q13554, Q92736, Q13557, P53779, Q9UQM7, Q8WZA2, P63096, P42263, P42262, P55196, Q16566, O14974
KEGG_PATHWAY	hsa04020:Calcium signaling pathway	13	2.81996	0.0446297	218	30	876	1.74128	0.99996	0.341648	0.327797	Q08462, Q13555, Q13554, Q14643, P05129, Q92736, Q13557, Q9UQM7, P17252, P23677, P00533, Q16566, P05771
KEGG_PATHWAY	hsa04912:GnRH signaling pathway	10	2.1692	0.0511276	218	21	876	1.9135	0.999991	0.366139	0.351296	Q08462, Q13555, Q13554, Q14643, P17252, Q13557, P00533, P53779, P05771, Q9UQM7
KEGG_PATHWAY	hsa04310:Wnt signaling pathway	10	2.1692	0.0511276	218	21	876	1.9135	0.999991	0.366139	0.351296	Q13555, Q13554, P05129, Q9Y4D1, P17252, Q13557, P35222, P53779, P05771, Q9UQM7
GOTERM_BP_DIRECT	GO:0060333~interferon-gamma-mediated signaling pathway	5	1.0846	0.0598689	441	6	1536	2.90249	1	1	1	Q13555, P42224, Q13554, Q13557, Q9UQM7
INTERPRO	IPR013543:Calcium/calmodulin-dependent protein kinase II, association-domain	4	0.867679	0.0745161	454	4	1574	3.46696	1	1	0.986784	Q13555, Q13554, Q13557, Q9UQM7
BIOCARTA	h_biopeptidesPathway:Bioactive Peptide Induced Signaling Pathway	10	2.1692	0.0749992	80	19	264	1.73684	0.999969	1	1	Q13555, P42224, Q13554, P63096, P17252, Q13557, P06241, P05771, Q9UQM7, P40763
GOTERM_CC_DIRECT	GO:0030666~endocytic vesicle membrane	9	1.95228	0.079646	454	17	1590	1.85411	1	1	0.993348	Q13555, Q13554, P42263, Q13557, P42262, P78352, Q9NRD5, Q9UQM7, O00401
KEGG_PATHWAY	hsa04066:HIF-1 signaling pathway	10	2.1692	0.0889733	218	23	876	1.74711	1	0.564345	0.541466	Q13555, P42345, Q13554, P05129, P17252, Q13557, P00533, P05771, Q9UQM7, P40763
BIOCARTA	h_pgc1aPathway:Regulation of PGC-1a	6	1.30152	0.0941188	80	9	264	2.2	0.999998	1	1	Q13555, Q13554, Q13557, Q16566, Q9UQM7, Q14012
KEGG_PATHWAY	hsa04740:Olfactory transduction	4	0.867679	0.10052	218	5	876	3.21468	1	0.603121	0.578671	Q13555, Q13554, Q13557, Q9UQM7
GOTERM_CC_DIRECT	GO:0033017~sarcoplasmic reticulum membrane	5	1.0846	0.106832	454	7	1590	2.50157	1	1	0.993348	Q13555, Q13554, Q92736, P30626, Q13557
KEGG_PATHWAY	hsa04728:Dopaminergic synapse	13	2.81996	0.130275	218	35	876	1.49253	1	0.733684	0.70394	Q13555, Q13554, Q14643, P05129, Q13557, Q14738, P53779, Q9UQM7, P63096, P17252, P42263, P42262, P05771
BIOCARTA	h_crebPathway:Transcription factor CREB and its extracellular signals	6	1.30152	0.204328	80	11	264	1.8	1	1	1	Q13555, Q13554, P17252, Q13557, P05771, Q9UQM7
GOTERM_BP_DIRECT	GO:0051924~regulation of calcium ion transport	4	0.867679	0.230698	441	6	1536	2.322	1	1	1	Q13555, Q13554, P30626, Q01484
GOTERM_CC_DIRECT	GO:0016529~sarcoplasmic reticulum	5	1.0846	0.236113	454	9	1590	1.94567	1	1	0.993348	Q14643, Q92736, P30626, Q12955, Q13557
UP_KEYWORDS	Sarcoplasmic reticulum	5	1.0846	0.240229	461	9	1604	1.933	1	1	0.945687	Q13555, Q13554, Q92736, P30626, Q13557
BIOCARTA	h_stathminPathway:Stathmin and breast cancer resistance to antimicrotubule agents	5	1.0846	0.265918	80	9	264	1.83333	1	1	1	Q13555, Q13554, Q13557, Q16566, Q9UQM7
KEGG_PATHWAY	hsa04261:Adrenergic signaling in cardiomyocytes	11	2.38612	0.359894	218	35	876	1.26291	1	1	0.963801	O00305, Q08462, Q13555, Q13554, Q92736, P63096, P17252, Q13557, Q14738, Q8WZA2, Q9UQM7
KEGG_PATHWAY	hsa04722:Neurotrophin signaling pathway	7	1.51844	0.423593	218	21	876	1.33945	1	1	0.963801	Q13555, Q92529, Q13554, Q13557, Q16566, P53779, Q9UQM7
KEGG_PATHWAY	hsa05152:Tuberculosis	7	1.51844	0.522515	218	23	876	1.22298	1	1	0.963801	Q13555, P42224, Q13554, P07339, Q13557, P53779, Q9UQM7
KEGG_PATHWAY	hsa04114:Oocyte meiosis	7	1.51844	0.614082	218	25	876	1.12514	1	1	0.963801	Q08462, Q13555, Q13554, Q14643, Q13557, Q14738, Q9UQM7
GOTERM_BP_DIRECT	GO:0000082~G1/S transition of mitotic cell cycle	3	0.650759	0.717679	441	8	1536	1.30612	1	1	1	Q13555, Q13557, Q9UQM7
GOTERM_BP_DIRECT	GO:1900034~regulation of cellular response to heat	6	1.30152	0.763883	441	21	1536	0.995141	1	1	1	Q13555, P42345, Q13554, Q13557, Q8N122, Q9UQM7
Annotation Cluster 13	Enrichment Score: 1.7464323799157897
Category	Term	Count	%	PValue	List Total	Pop Hits	Pop Total	Fold Enrichment	Bonferroni	Benjamini	FDR	Uniprot Accession #
INTERPRO	IPR001660:Sterile alpha motif domain	7	1.51844	0.00293551	454	7	1574	3.46696	0.930907	0.140441	0.138432	O75334, Q7Z6G8, Q674X7, Q8WXD9, Q6UWE0, O75145, Q9ULJ8
INTERPRO	IPR013761:Sterile alpha motif/pointed domain	7	1.51844	0.00889066	454	8	1574	3.03359	0.999702	0.351375	0.346349	O75334, Q7Z6G8, Q674X7, Q8WXD9, Q6UWE0, O75145, Q9ULJ8
SMART	SM00454:SAM	7	1.51844	0.00948608	284	7	797	2.80634	0.833356	0.29723	0.292487	O75334, Q7Z6G8, Q674X7, Q8WXD9, Q6UWE0, O75145, Q9ULJ8
UP_SEQ_FEATURE	domain:SAM 1	5	1.0846	0.025927	461	5	1603	3.47722	1	0.86162	0.844737	O75334, Q7Z6G8, Q674X7, Q8WXD9, O75145
UP_SEQ_FEATURE	domain:SAM 2	5	1.0846	0.025927	461	5	1603	3.47722	1	0.86162	0.844737	O75334, Q7Z6G8, Q674X7, Q8WXD9, O75145
UP_SEQ_FEATURE	domain:SAM 3	3	0.650759	0.199617	461	3	1603	3.47722	1	1	0.981092	O75334, Q674X7, O75145
Annotation Cluster 14	Enrichment Score: 1.6688496245268225
Category	Term	Count	%	PValue	List Total	Pop Hits	Pop Total	Fold Enrichment	Bonferroni	Benjamini	FDR	Uniprot Accession #
UP_KEYWORDS	Guanine-nucleotide releasing factor	18	3.90456	2.76857e-06	461	22	1604	2.84678	0.000868955	7.90302e-05	7.44998e-05	Q8N1I0, O95248, O75962, Q9Y4F1, Q12979, Q8WZA2, Q14C86, Q5TH69, Q9NPQ8, Q9Y4G8, O14827, Q9Y6D6, P11274, P86790, Q9Y6D5, Q6DN90, Q14155, Q92974
INTERPRO	IPR000219:Dbl homology (DH) domain	7	1.51844	0.0202382	454	9	1574	2.69652	1	0.76652	0.755558	O14827, P11274, O75962, Q9Y4F1, Q12979, Q14155, Q92974
GOTERM_MF_DIRECT	GO:0005089~Rho guanyl-nucleotide exchange factor activity	7	1.51844	0.0207926	442	9	1524	2.68175	0.999997	1	1	O14827, P11274, O75962, Q9Y4F1, Q12979, Q14155, Q92974
UP_SEQ_FEATURE	domain:DH	6	1.30152	0.047986	461	8	1603	2.60792	1	1	0.981092	O14827, P11274, Q9Y4F1, Q12979, Q14155, Q92974
SMART	SM00325:RhoGEF	7	1.51844	0.0563376	284	9	797	2.18271	0.999982	0.882622	0.868538	O14827, P11274, O75962, Q9Y4F1, Q12979, Q14155, Q92974
GOTERM_BP_DIRECT	GO:0035023~regulation of Rho protein signal transduction	7	1.51844	0.063181	441	11	1536	2.21645	1	1	1	O14827, P11274, O75962, Q9Y4F1, Q12979, Q14155, Q92974
INTERPRO	IPR001331:Guanine-nucleotide dissociation stimulator, CDC24, conserved site	3	0.650759	0.326777	454	4	1574	2.60022	1	1	0.986784	P11274, Q12979, Q14155
GOTERM_BP_DIRECT	GO:0043065~positive regulation of apoptotic process	11	2.38612	0.685672	441	38	1536	1.00823	1	1	1	Q8IU85, O14827, O43236, P00338, O75962, O75146, O00571, P35222, Q12979, Q14155, Q92974
Annotation Cluster 15	Enrichment Score: 1.657714630636933
Category	Term	Count	%	PValue	List Total	Pop Hits	Pop Total	Fold Enrichment	Bonferroni	Benjamini	FDR	Uniprot Accession #
UP_KEYWORDS	Zinc-finger	28	6.07375	0.000281637	461	52	1604	1.87352	0.0846478	0.00552712	0.00521028	P05129, O75689, Q9Y5S2, Q9ULH1, Q99490, Q96CV9, Q9HBF4, O75382, Q96P47, Q8WW22, P17252, Q9Y6V0, P45974, P05771, Q92974, Q8N3P4, Q5T4S7, Q12933, Q9Y2X7, Q9UPW8, Q02156, Q6UWE0, Q86UR5, Q8N9I9, Q8WU79, Q9UPA5, O14578, P41743
UP_KEYWORDS	Zinc	39	8.45987	0.00197691	461	88	1604	1.542	0.462788	0.0310374	0.0292582	P05129, O75689, Q9Y5S2, Q7RTP6, Q9ULH1, Q99490, Q96CV9, Q9HBF4, O75382, O43813, P53667, Q96P47, Q8WW22, Q8IXJ6, Q96SW2, P17252, Q9Y6V0, P45974, P05771, Q9NQC7, Q92974, Q9UPQ0, Q8N3P4, Q5T4S7, Q12933, Q9Y2X7, Q6H8Q1, Q9UPW8, Q02156, Q6UWE0, P52943, Q86UR5, Q8N9I9, Q8WU79, Q9UPA5, P49588, O14578, Q9NRD5, P41743
UP_KEYWORDS	Metal-binding	75	16.269	0.526467	461	258	1604	1.01145	1	1	0.945687	P05129, P12814, Q9UPN3, Q9Y3I0, Q99490, O75382, Q8IXI2, Q96P47, Q96SW2, Q13085, P45974, P05771, Q92974, Q7KZI7, Q8N3P4, Q9Y2X7, P35609, Q6H8Q1, Q9UPW8, Q9UQM7, Q86UR5, P11498, Q8WU79, Q8TDC3, P63096, P22102, Q9NRD5, Q13131, P46459, Q9HD20, P02794, Q08462, P02792, O75689, Q13813, P30626, P14618, Q9Y5S2, Q8IWQ3, Q9ULD0, Q7RTP6, O00562, Q9ULH1, Q96CV9, Q9HBF4, P53667, O43813, Q8WW22, Q8IXJ6, P17252,…
GOTERM_MF_DIRECT	GO:0046872~metal ion binding	38	8.24295	0.798169	442	141	1524	0.929238	1	1	1	O75689, Q9Y5S2, Q9ULD0, O00562, Q9ULH1, Q9Y3I0, Q99490, Q96CV9, Q9HBF4, Q96P47, Q8WW22, Q96RQ3, Q96SW2, P17252, Q13085, P06241, Q92974, Q9H4B0, Q9Y2X7, Q9NQX3, Q9UPW8, Q02156, Q9UQM7, Q86UR5, P11498, Q8WU79, Q9UPA5, P17858, O14773, P22102, P08237, Q01813, O14578, Q9NRD5, P41743, Q13131, P46459, Q9HD20
Annotation Cluster 16	Enrichment Score: 1.287193010450275
Category	Term	Count	%	PValue	List Total	Pop Hits	Pop Total	Fold Enrichment	Bonferroni	Benjamini	FDR	Uniprot Accession #
UP_KEYWORDS	Mitosis	15	3.2538	0.018945	461	29	1604	1.79969	0.997536	0.228797	0.215681	O00139, Q15555, Q8IWQ3, Q14008, Q9NQW6, O75122, O00401, Q16181, Q9Y6G9, Q8IXJ6, Q7Z460, Q9NWV8, O14578, Q93008, Q92974
GOTERM_BP_DIRECT	GO:0051301~cell division	20	4.33839	0.0259792	441	44	1536	1.58318	1	1	1	P07437, O00139, Q15555, O43236, Q8IWQ3, Q14008, O75122, Q9P0V9, Q02156, Q9UHD8, O00401, P50995, Q9Y6G9, Q8IXJ6, Q7Z460, Q9NWV8, P63096, P27816, Q93008, Q92974
GOTERM_BP_DIRECT	GO:0007067~mitotic nuclear division	14	3.03688	0.0763982	441	31	1536	1.57296	1	1	1	Q15555, Q8IWQ3, Q14008, Q9NQW6, O00401, Q16181, Q9Y6G9, Q8IXJ6, Q9NWV8, O14578, O14974, Q93008, Q96JH7, Q92974
UP_KEYWORDS	Cell division	21	4.55531	0.0941439	461	53	1604	1.37863	1	0.723498	0.682023	O00139, Q15555, O43236, Q8IWQ3, Q14008, Q9NQW6, O75122, Q9P0V9, Q02156, Q9UHD8, O00401, P50995, Q16181, Q9Y6G9, Q8IXJ6, Q7Z460, Q9NWV8, P63096, O14578, Q93008, Q92974
UP_KEYWORDS	Cell cycle	25	5.42299	0.103524	461	66	1604	1.31795	1	0.728686	0.686914	Q15555, O43236, Q8IWQ3, Q14008, O75122, Q9NQW6, Q9P0V9, Q9UHD8, O00401, P50995, Q9Y6G9, Q8IXJ6, Q14012, Q93008, Q9NQC7, Q92974, O00139, Q02156, Q16181, Q9NWV8, Q8TDC3, Q7Z460, P63096, O14578, O14976
Annotation Cluster 17	Enrichment Score: 1.1527425015856962
Category	Term	Count	%	PValue	List Total	Pop Hits	Pop Total	Fold Enrichment	Bonferroni	Benjamini	FDR	Uniprot Accession #
GOTERM_CC_DIRECT	GO:0033270~paranode region of axon	6	1.30152	0.022733	454	7	1590	3.00189	0.999969	0.68502	0.678958	P78357, Q8IXJ6, Q12955, O94856, P20916, Q9H254
GOTERM_CC_DIRECT	GO:0033268~node of Ranvier	5	1.0846	0.106832	454	7	1590	2.50157	1	1	0.993348	Q12955, O94856, Q12959, Q99250, Q9H254
GOTERM_CC_DIRECT	GO:0043194~axon initial segment	4	0.867679	0.143355	454	5	1590	2.80176	1	1	0.993348	Q12955, O94856, Q13557, Q9H254
Annotation Cluster 18	Enrichment Score: 1.1391848380468397
Category	Term	Count	%	PValue	List Total	Pop Hits	Pop Total	Fold Enrichment	Bonferroni	Benjamini	FDR	Uniprot Accession #
INTERPRO	IPR000048:IQ motif, EF-hand binding site	10	2.1692	0.00283081	454	13	1574	2.66689	0.923987	0.140441	0.138432	P35580, Q6X4W1, O14827, Q6DN90, Q99250, Q5JU85, Q92614, P35579, Q9Y4I1, Q7Z406
UP_SEQ_FEATURE	domain:IQ	8	1.73536	0.00794026	461	10	1603	2.78178	0.999989	0.32419	0.317837	P35580, O14827, Q6DN90, Q99250, Q5JU85, Q92614, P35579, Q7Z406
GOTERM_BP_DIRECT	GO:0030048~actin filament-based movement	5	1.0846	0.0257499	441	5	1536	3.48299	1	1	1	P35580, A6NGB9, P35579, Q9Y4I1, Q7Z406
UP_SEQ_FEATURE	domain:Myosin head-like	5	1.0846	0.025927	461	5	1603	3.47722	1	0.86162	0.844737	P35580, Q92614, P35579, Q9Y4I1, Q7Z406
INTERPRO	IPR027401:Myosin-like IQ motif-containing domain	5	1.0846	0.0262063	454	5	1574	3.46696	1	0.88228	0.869662	P35580, Q6X4W1, Q92614, P35579, Q7Z406
GOTERM_CC_DIRECT	GO:0042641~actomyosin	6	1.30152	0.0465868	454	8	1590	2.62665	1	1	0.993348	P35580, Q9Y5S2, Q92614, P35579, Q9Y4I1, Q7Z406
GOTERM_CC_DIRECT	GO:0005903~brush border	9	1.95228	0.0555578	454	16	1590	1.96999	1	1	0.993348	P35580, Q15149, O43707, P60660, P12814, Q13045, P35579, P47756, Q7Z406
GOTERM_CC_DIRECT	GO:0001725~stress fiber	9	1.95228	0.0555578	454	16	1590	1.96999	1	1	0.993348	P35580, Q16181, O43707, Q9Y4D1, P12814, Q9UHD8, Q8N3V7, P35579, Q7Z406
INTERPRO	IPR001609:Myosin head, motor domain	5	1.0846	0.0608453	454	6	1574	2.88913	1	1	0.986784	P35580, Q92614, P35579, Q9Y4I1, Q7Z406
GOTERM_BP_DIRECT	GO:0031032~actomyosin structure organization	7	1.51844	0.063181	441	11	1536	2.21645	1	1	1	P35580, Q9UPQ0, Q9Y5S2, Q9C0D0, Q92614, P35579, Q7Z406
INTERPRO	IPR002928:Myosin tail	4	0.867679	0.0745161	454	4	1574	3.46696	1	1	0.986784	P35580, Q92614, P35579, Q7Z406
GOTERM_MF_DIRECT	GO:0030898~actin-dependent ATPase activity	4	0.867679	0.0756215	442	4	1524	3.44796	1	1	1	P35580, P60660, P35579, Q7Z406
GOTERM_MF_DIRECT	GO:0000146~microfilament motor activity	4	0.867679	0.0756215	442	4	1524	3.44796	1	1	1	P35580, P35579, Q9Y4I1, Q7Z406
GOTERM_CC_DIRECT	GO:0016459~myosin complex	6	1.30152	0.0807843	454	9	1590	2.3348	1	1	0.993348	P35580, P60660, Q92614, P35579, Q9Y4I1, Q7Z406
UP_KEYWORDS	Myosin	6	1.30152	0.0828392	461	9	1604	2.3196	1	0.666962	0.628728	P35580, P60660, Q92614, P35579, Q9Y4I1, Q7Z406
GOTERM_MF_DIRECT	GO:0003774~motor activity	8	1.73536	0.110834	442	15	1524	1.83891	1	1	1	P35580, O00139, P63167, P60660, Q92614, P35579, Q9Y4I1, Q7Z406
UP_KEYWORDS	Motor protein	11	2.38612	0.118773	461	24	1604	1.59472	1	0.73127	0.68935	P35580, Q14204, O00139, P63167, Q9Y6G9, P60660, Q7Z4S6, Q92614, P35579, Q9Y4I1, Q7Z406
SMART	SM00242:MYSc	5	1.0846	0.122163	284	6	797	2.33862	1	1	0.989305	P35580, Q92614, P35579, Q9Y4I1, Q7Z406
GOTERM_MF_DIRECT	GO:0043531~ADP binding	6	1.30152	0.131904	442	10	1524	2.06878	1	1	1	P35580, P14618, P54619, P00367, Q92614, P35579
SMART	SM00015:IQ	6	1.30152	0.17914	284	9	797	1.87089	1	1	0.989305	P35580, Q99250, Q92614, P35579, Q9Y4I1, Q7Z406
GOTERM_CC_DIRECT	GO:0097513~myosin II filament	3	0.650759	0.197096	454	3	1590	3.5022	1	1	0.993348	P35580, P35579, Q7Z406
INTERPRO	IPR004009:Myosin, N-terminal, SH3-like	3	0.650759	0.200646	454	3	1574	3.46696	1	1	0.986784	P35580, P35579, Q7Z406
INTERPRO	IPR008989:Myosin S1 fragment, N-terminal	3	0.650759	0.200646	454	3	1574	3.46696	1	1	0.986784	P35580, P35579, Q9Y4I1
GOTERM_CC_DIRECT	GO:0016460~myosin II complex	3	0.650759	0.321704	454	4	1590	2.62665	1	1	0.993348	P35580, P35579, Q7Z406
UP_KEYWORDS	Cell shape	3	0.650759	0.551129	461	6	1604	1.7397	1	1	0.945687	P35580, P35579, Q7Z406
Annotation Cluster 19	Enrichment Score: 1.1136518298328144
Category	Term	Count	%	PValue	List Total	Pop Hits	Pop Total	Fold Enrichment	Bonferroni	Benjamini	FDR	Uniprot Accession #
GOTERM_MF_DIRECT	GO:0017048~Rho GTPase binding	7	1.51844	0.0207926	442	9	1524	2.68175	0.999997	1	1	O60610, Q9Y4D1, Q9Y5S2, Q96PY5, O14578, Q27J81, Q92974
UP_SEQ_FEATURE	domain:FH2	5	1.0846	0.025927	461	5	1603	3.47722	1	0.86162	0.844737	O60610, Q9NZ56, Q9Y4D1, Q96PY5, Q27J81
INTERPRO	IPR015425:Actin-binding FH2	5	1.0846	0.0262063	454	5	1574	3.46696	1	0.88228	0.869662	O60610, Q9NZ56, Q9Y4D1, Q96PY5, Q27J81
SMART	SM00498:FH2	5	1.0846	0.0563326	284	5	797	2.80634	0.999982	0.882622	0.868538	O60610, Q9NZ56, Q9Y4D1, Q96PY5, Q27J81
UP_SEQ_FEATURE	domain:GBD/FH3	4	0.867679	0.0739282	461	4	1603	3.47722	1	1	0.981092	O60610, Q9Y4D1, Q96PY5, Q27J81
INTERPRO	IPR014768:GTPase-binding/formin homology 3	4	0.867679	0.0745161	454	4	1574	3.46696	1	1	0.986784	O60610, Q9Y4D1, Q96PY5, Q27J81
INTERPRO	IPR010472:Diaphanous FH3	4	0.867679	0.0745161	454	4	1574	3.46696	1	1	0.986784	O60610, Q9Y4D1, Q96PY5, Q27J81
INTERPRO	IPR010473:Diaphanous GTPase-binding	4	0.867679	0.0745161	454	4	1574	3.46696	1	1	0.986784	O60610, Q9Y4D1, Q96PY5, Q27J81
SMART	SM01139:SM01139	4	0.867679	0.130814	284	4	797	2.80634	1	1	0.989305	O60610, Q9Y4D1, Q96PY5, Q27J81
SMART	SM01140:SM01140	4	0.867679	0.130814	284	4	797	2.80634	1	1	0.989305	O60610, Q9Y4D1, Q96PY5, Q27J81
UP_SEQ_FEATURE	domain:DAD	3	0.650759	0.199617	461	3	1603	3.47722	1	1	0.981092	O60610, Q9Y4D1, Q96PY5
UP_SEQ_FEATURE	domain:FH1	3	0.650759	0.199617	461	3	1603	3.47722	1	1	0.981092	O60610, Q9NZ56, Q9Y4D1
INTERPRO	IPR014767:Diaphanous autoregulatory	3	0.650759	0.200646	454	3	1574	3.46696	1	1	0.986784	O60610, Q9Y4D1, Q96PY5
Annotation Cluster 20	Enrichment Score: 1.0436702954838382
Category	Term	Count	%	PValue	List Total	Pop Hits	Pop Total	Fold Enrichment	Bonferroni	Benjamini	FDR	Uniprot Accession #
GOTERM_CC_DIRECT	GO:0043034~costamere	6	1.30152	0.022733	454	7	1590	3.00189	0.999969	0.68502	0.678958	Q8IVF2, Q15149, Q86YM7, Q12955, Q01484, Q09666
GOTERM_CC_DIRECT	GO:0030315~T-tubule	6	1.30152	0.177572	454	11	1590	1.91029	1	1	0.993348	Q8IVF2, P30626, Q12955, Q13557, Q01484, Q09666
GOTERM_CC_DIRECT	GO:0042383~sarcolemma	8	1.73536	0.183214	454	17	1590	1.6481	1	1	0.993348	Q8IVF2, Q13884, Q15149, Q92736, Q12955, Q12959, Q01484, Q09666
