# Supplementary material for: Targeting the Post-Synaptic Proteome in Alzheimer Disease with Psychosis
Source: Research Square preprint supplement (doi:10.21203/rs.3.rs-1514870/v1), 2022-04-04
Supplement: Supplementary file 4 [file 6b2585d1b913c73f587cd6df.xlsx]

## Sheet: Legend
Column Header	Definition
protein	Uniprot Accession #
external_gene_name	Official Gene Symbol
logFC	Log Base 2 of the Fold Change of AD+P relative to AD-P
AveExpr	Average expression across all samples, in log2
t	t statistic
P.Value
q.value
Entrez	Entrez gene id
Chr	Chromosome
Start(b38)	Gene start position (bp) , human genome buildGRCh38/hg38
End(b38)	Gene end position (bp), human genome buildGRCh38/hg38
#SNP(0kb)	Number of SNPs within the gene boundaries
p(0kb)	MAGMA gene-wide p value using SNPs within the gene boundaries
#SNP(35-10)	Number of SNPs 35kb upstream and 10 kb downstream and within the gene boundary
p(35-10)	MAGMA gene-wide p value using all SNPs 35kb upstream, 10kb downstream, and within within the gene boundaries

## Sheet: Table 2
protein	external_gene_name	logFC	AveExpr	t	P.Value	q.value		Entrez	Chr	Start(b38)	End(b38)	#SNP(0kb)	p(0kb)	#SNP(35-10)	p(35-10)
Q8IU85	CAMK1D	-0.461011	-0.0676978	-2.25105	0.024384	0.168111		57118	10	12349517	12835545	1849	0.0003314	2027	0.0003562
Q6UWR7	ENPP6	-0.434168	-0.055182	-2.09959	0.0357668	0.168111		133121	4	184088706	184217961	462	0.0003801	632	3.377e-05
Q8N3V7	SYNPO	-0.616603	-0.113346	-3.10477	0.00190459	0.168111		11346	5	150586037	150659230	128	0.003096	235	0.005716
Q4KMP7	TBC1D10B	-0.516558	-0.0317899	-2.46518	0.0136955	0.168111		26000	16	30357101	30370258	14	0.003105	73	0.004886
P00533	EGFR	-0.43496	0.00125671	-2.06623	0.0388084	0.168111		1956	7	55019032	55207338	505	0.007626	592	0.01641
Q8NF91	SYNE1	-0.509509	-0.0499782	-2.45374	0.0141391	0.168111		23345	6	152121684	152637399	1646	0.01167	1782	0.01272
O95757	HSPA4L	-0.446745	0.0330332	-2.12609	0.0334974	0.168111		22824	4	127782209	127834073	49	0.01198	97	0.01457
Q99832	CCT7	-0.421835	-0.00953564	-2.00966	0.0444684	0.168111		10574	2	73233425	73253022	48	0.01589	159	0.09751
P04075	ALDOA	-0.46753	-0.0242144	-2.22963	0.0257736	0.168111		226	16	30053090	30070420	10	0.03199	76	0.01695
P31040	SDHA	-0.453341	-0.000533977	-2.15481	0.0311781	0.168111		6389	5	218223	264816	369	0.03225	606	0.01974
O60381	HBP1	-0.498702	0.01972	-2.36608	0.0179786	0.168111		26959	7	107168961	107202529	54	0.03232	157	0.04561
Q14204	DYNC1H1	-0.462601	-0.00894329	-2.2037	0.0275466	0.168111		1778	14	101964528	102050798	164	0.03303	351	0.03326
P30626	SRI	-0.418698	-0.0237808	-1.99671	0.0458588	0.168111		6717	7	88205115	88226993	34	0.0333	92	0.06896
P41743	PRKCI	-0.467555	-0.0309983	-2.23106	0.0256784	0.168111		5584	3	170222432	170305982	274	0.03952	391	0.03937
P51570	GALK1	-0.415794	-0.00719627	-1.98006	0.0476988	0.170208		2584	17	75757937	75765199	15	0.03974	95	0.05808
P35222	CTNNB1	-0.435912	-0.0441148	-2.09034	0.0365888	0.168111		1499	3	41199451	41240448	50	0.04167	119	0.03839
Q15700	DLG2	-0.481461	-0.0330723	-2.29824	0.0215495	0.168111		1740	11	83455012	85628534	6075	0.0421	6171	0.03803
P07602	PSAP	-0.665262	-0.0231786	-3.17244	0.00151195	0.168111		5660	10	71816298	71851325	118	0.04474	288	0.1211
Q9H269	VPS16	-0.494471	-0.0333697	-2.36047	0.0182529	0.168111		64601	20	2840697	2866732	72	0.04486	165	0.05581
P62333	PSMC6	-0.453694	0.0104704	-2.15096	0.0314808	0.168111		5706	14	52707163	52727998	26	0.04569	130	0.08534
Q8WU79	SMAP2	-0.462657	-0.0494072	-2.22709	0.0259425	0.168111		64744	1	40344844	40423326	176	0.04685	329	0.1255
Q9NWV8	BABAM1	-0.414282	-0.086943	-2.04859	0.0405035	0.168111		29086	19	17267376	17279353	39	0.04728	193	0.1169
Q9Y2E4	DIP2C	-0.446033	-0.00392382	-2.12253	0.0337946	0.168111		22982	10	274190	689689	997	0.04742	1213	0.06276
Q9BZF1	OSBPL8	-0.425559	-0.0613375	-2.06806	0.0386362	0.168111		114882	12	76351797	76559809	381	0.0493	499	0.05396
Q96Q05	TRAPPC9	-0.54836	-0.0417489	-2.62585	0.00864421	0.168111		83696	8	139728081	140458579	2104	0.04945	2165	0.05866
