# Supplementary material for: Targeting the Post-Synaptic Proteome in Alzheimer Disease with Psychosis
Source: Research Square preprint supplement (doi:10.21203/rs.3.rs-1514870/v1), 2022-04-04
Supplement: Supplementary file 5 [file 6f656a58a776acace221a367.xlsx]

## Sheet: Legend
Column Header	Definition
protein	Uniprot Accession #
external_gene_name	Official Gene Symbol
logFC	Log Base 2 of the Fold Change of AD+P relative to AD-P
AveExpr	Average expression across all samples, in log2
t	t statistic
P.Value
q.value

## Sheet: Table S1
	protein	external_gene_name	logFC	AveExpr	t	P.Value	q.value
273	P07602	PSAP	-0.665262	-0.0231786	-3.17244	0.00151195	0.168111
1094	Q8IVF2	AHNAK2	-0.623429	-0.102835	-3.11511	0.00183909	0.168111
1119	Q8N3V7	SYNPO	-0.616603	-0.113346	-3.10477	0.00190459	0.168111
1063	Q7Z460	CLASP1	-0.620416	-0.00816971	-2.95505	0.00312666	0.168111
1372	Q9HA65	TBC1D17	-0.60469	-0.0530972	-2.91934	0.00350822	0.168111
31	O14490	DLGAP1	-0.580497	-0.0847588	-2.86668	0.00414852	0.168111
327	P11277	SPTB	-0.579948	-0.0769082	-2.84974	0.0043761	0.168111
994	Q5SW79	CEP170	-0.594101	-0.0316673	-2.83517	0.00458066	0.168111
1222	Q96CV9	OPTN	-0.56491	-0.0755574	-2.77334	0.00554905	0.168111
1516	Q9UPR0	PLCL2	-0.575895	-0.0326436	-2.74879	0.00598223	0.168111
1012	Q66K74	MAP1S	-0.575076	-0.0314896	-2.74429	0.00606486	0.168111
829	Q09666	AHNAK	-0.551396	-0.0957208	-2.74169	0.00611306	0.168111
1494	Q9UJF2	RASAL2	-0.547197	-0.0776224	-2.69006	0.00714457	0.168111
61	O15079	SNPH	-0.56339	-0.0290859	-2.68778	0.00719362	0.168111
1160	Q8TDC3	BRSK1	-0.548406	-0.0729848	-2.68763	0.00719697	0.168111
990	Q5JU85	IQSEC2	-0.553004	-0.0609263	-2.68652	0.00722082	0.168111
1116	Q8N387	MUC15	-0.544436	-0.0808606	-2.68216	0.00731568	0.168111
894	Q14244	MAP7	-0.535176	-0.104712	-2.67777	0.00741212	0.168111
917	Q15042	RAB3GAP1	-0.558379	-0.0436662	-2.67689	0.00743167	0.168111
1258	Q96PU5	NEDD4L	-0.543713	-0.0763487	-2.67071	0.00756983	0.168111
1473	Q9UEW8	STK39	-0.546638	-0.0681735	-2.67003	0.00758518	0.168111
506	P35609	ACTN2	-0.53398	-0.0985306	-2.66006	0.00781348	0.168111
941	Q15477	SKIV2L	-0.548279	-0.0592173	-2.65998	0.0078154	0.168111
955	Q16566	CAMK4	-0.522534	-0.1214	-2.64652	0.00813325	0.168111
1203	Q92974	ARHGEF2	-0.536585	-0.0820279	-2.64538	0.00816078	0.168111
42	O14773	TPP1	-0.547348	-0.0485151	-2.63302	0.00846385	0.168111
428	P23677	ITPKA	-0.543775	-0.0559922	-2.63135	0.00850557	0.168111
1262	Q96Q05	TRAPPC9	-0.54836	-0.0417489	-2.62585	0.00864421	0.168111
1026	Q6NV74	CRACDL	-0.523041	-0.106964	-2.62138	0.00875842	0.168111
1062	Q7Z406	MYH14	-0.53468	-0.0656534	-2.60685	0.0091388	0.168111
1003	Q5TBA9	FRY	-0.545024	-0.0359841	-2.60309	0.00923956	0.168111
1137	Q8N9I9	DTX3	-0.532466	-0.0689016	-2.60213	0.00926545	0.168111
206	P00505	GOT2	-0.534531	-0.0604534	-2.59581	0.00943765	0.168111
1321	Q9C0D0	PHACTR1	-0.5176	-0.104855	-2.59011	0.00959554	0.168111
1396	Q9NQC7	CYLD	-0.524997	-0.081522	-2.58744	0.00966999	0.168111
667	P57737	CORO7	-0.531174	-0.0635929	-2.5858	0.00971618	0.168111
133	O75334	PPFIA2	-0.530282	-0.0646145	-2.58342	0.00978364	0.168111
1323	Q9C0H9	SRCIN1	-0.526996	-0.072524	-2.58189	0.00982686	0.168111
1457	Q9P2B4	CTTNBP2NL	-0.539491	-0.0404786	-2.58142	0.00984048	0.168111
1102	Q8IYB4	PEX5L	-0.539171	-0.0184115	-2.57074	0.010149	0.168111
1453	Q9P1A6	DLGAP2	-0.522762	-0.0744736	-2.56454	0.0103322	0.168111
1479	Q9UHD2	TBK1	-0.518183	-0.0866362	-2.5619	0.0104111	0.168111
242	P05129	PRKCG	-0.521861	-0.0735221	-2.55847	0.0105144	0.168111
839	Q12979	ABR	-0.515191	-0.0896111	-2.55174	0.0107197	0.168111
434	P24821	TNC	-0.513099	-0.0900416	-2.54206	0.011021	0.168111
837	Q12955	ANK3	-0.519654	-0.0695612	-2.54069	0.0110642	0.168111
1034	Q6PKG0	LARP1	-0.525444	-0.0550255	-2.54067	0.011065	0.168111
559	P45974	USP5	-0.524821	-0.0551715	-2.53795	0.0111512	0.168111
863	Q13510	ASAH1	-0.531866	-0.0262558	-2.5367	0.0111913	0.168111
326	P11274	BCR	-0.523548	-0.0559727	-2.53343	0.0112963	0.168111
27	O00562	PITPNM1	-0.529894	-0.0341751	-2.52995	0.0114087	0.168111
1341	Q9H254	SPTBN4	-0.522735	-0.0504446	-2.51836	0.0117911	0.168111
823	Q08462	ADCY2	-0.522485	-0.0506625	-2.51759	0.011817	0.168111
66	O15294	OGT	-0.521143	-0.0525697	-2.51493	0.0119065	0.168111
926	Q15149	PLEC	-0.52655	-0.0124036	-2.50939	0.012095	0.168111
1596	Q9Y6D6	ARFGEF1	-0.524917	-0.0365935	-2.50767	0.0121538	0.168111
329	P11498	PC	-0.525668	-0.00447573	-2.50196	0.0123518	0.168111
1515	Q9UPQ0	LIMCH1	-0.511381	-0.068189	-2.49785	0.012496	0.168111
124	O75122	CLASP2	-0.522614	-0.0332046	-2.49474	0.0126059	0.168111
1345	Q9H2M9	RAB3GAP2	-0.514283	-0.0584251	-2.49349	0.0126506	0.168111
101	O43865	AHCYL1	-0.505016	-0.0795018	-2.48575	0.0129289	0.168111
795	Q02156	PRKCE	-0.508693	-0.0667037	-2.48208	0.0130628	0.168111
1220	Q96BY7	ATG2B	-0.515854	-0.0482569	-2.48104	0.0131009	0.168111
1113	Q8N1I0	DOCK4	-0.502584	-0.0818642	-2.4775	0.0132316	0.168111
1166	Q8WUH2	TGFBRAP1	-0.510883	-0.0581999	-2.47656	0.0132665	0.168111
74	O43236	SEPTIN4	-0.516866	-0.0414749	-2.47463	0.0133384	0.168111
1260	Q96PV0	SYNGAP1	-0.502211	-0.0792155	-2.47148	0.0134566	0.168111
1363	Q9H7D7	WDR26	-0.503891	-0.0715337	-2.46702	0.0136252	0.168111
34	O14531	DPYSL4	-0.518668	-0.00130276	-2.46597	0.0136655	0.168111
979	Q4KMP7	TBC1D10B	-0.516558	-0.0317899	-2.46518	0.0136955	0.168111
1188	Q92574	TSC1	-0.511085	-0.0493133	-2.46002	0.0138938	0.168111
531	P40763	STAT3	-0.514799	-0.0316724	-2.45673	0.0140218	0.168111
1148	Q8NF91	SYNE1	-0.509509	-0.0499782	-2.45374	0.0141391	0.168111
824	Q08495	DMTN	-0.501174	-0.070947	-2.45271	0.0141794	0.168111
1184	Q92556	ELMO1	-0.50377	-0.0635294	-2.45228	0.0141964	0.168111
318	P11137	MAP2	-0.512459	-0.04049	-2.45209	0.0142041	0.168111
953	Q16531	DDB1	-0.489203	-0.106593	-2.45112	0.0142423	0.168111
539	P42224	STAT1	-0.505827	-0.057463	-2.45061	0.0142627	0.168111
1568	Q9Y3S1	WNK2	-0.513707	-0.0189635	-2.44937	0.0143117	0.168111
800	Q02410	APBA1	-0.513948	0.0341685	-2.44673	0.0144172	0.168111
1088	Q86YS7	C2CD5	-0.513202	-0.0151849	-2.44639	0.0144304	0.168111
995	Q5T0F9	CC2D1B	-0.515353	0.00445342	-2.44562	0.0144615	0.168111
1382	Q9HD20	ATP13A1	-0.511194	-0.032669	-2.43998	0.014689	0.168111
1589	Q9Y5S2	CDC42BPB	-0.501049	-0.0596471	-2.43167	0.0150306	0.168111
642	P54619	PRKAG1	-0.500648	-0.0603268	-2.43102	0.0150573	0.168111
4	A6NGB9	WIPF3	-0.509784	-0.0184219	-2.43063	0.0150738	0.168111
229	P04350	TUBB4A	-0.504713	-0.0482784	-2.4275	0.0152044	0.168111
1112	Q8N1G4	LRRC47	-0.509085	-0.00520662	-2.42339	0.0153775	0.168111
1006	Q5TH69	ARFGEF3	-0.506707	-0.0319999	-2.41826	0.015596	0.168111
1212	Q96A23	CPNE4	-0.488207	-0.0888127	-2.41691	0.0156542	0.168111
1017	Q6DN14	MCTP1	-0.4984	-0.0568764	-2.41348	0.015802	0.168111
1191	Q92614	MYO18A	-0.501675	-0.0469392	-2.4105	0.0159316	0.168111
292	P09417	QDPR	-0.505455	-0.023167	-2.41036	0.0159378	0.168111
1058	Q7RTP6	MICAL3	-0.505287	-0.0175662	-2.40906	0.0159948	0.168111
455	P27816	MAP4	-0.484903	-0.0921053	-2.40547	0.016153	0.168111
1399	Q9NQX3	GPHN	-0.475874	-0.116604	-2.40185	0.0163134	0.168111
504	P35579	MYH9	-0.496604	-0.0536348	-2.39854	0.0164616	0.168111
1513	Q9UPA5	BSN	-0.492753	-0.0622687	-2.39635	0.0165603	0.168111
335	P12814	ACTN1	-0.482722	-0.0926867	-2.39552	0.0165981	0.168111
125	O75145	PPFIA3	-0.498775	-0.0447301	-2.39267	0.0167275	0.168111
272	P07437	TUBB	-0.497368	-0.0457486	-2.38771	0.0169549	0.168111
843	Q13045	FLII	-0.500682	-0.0234443	-2.38764	0.0169582	0.168111
1418	Q9NV70	EXOC1	-0.500837	-0.0118818	-2.3867	0.0170015	0.168111
218	P02794	FTH1	-0.497047	-0.0460381	-2.38668	0.0170024	0.168111
1514	Q9UPN3	MACF1	-0.500941	-0.00699228	-2.38545	0.0170596	0.168111
1021	Q6IAN0	DHRS7B	-0.480914	-0.0916684	-2.38503	0.017079	0.168111
251	P05771	PRKCB	-0.491431	-0.0588995	-2.38358	0.0171462	0.168111
1018	Q6DN90	IQSEC1	-0.495997	-0.0466692	-2.38275	0.0171852	0.168111
1528	Q9UQM7	CAMK2A	-0.490422	-0.0594873	-2.37979	0.0173236	0.168111
970	Q27J81	INF2	-0.487767	-0.0654565	-2.37778	0.0174186	0.168111
972	Q2M3C7	SPHKAP	-0.496817	-0.0378251	-2.37462	0.0175683	0.168111
1048	Q7KZF4	SND1	-0.497682	-0.0184392	-2.37293	0.017649	0.168111
1557	Q9Y2Z4	YARS2	-0.488841	-0.0581286	-2.36958	0.0178097	0.168111
1526	Q9UQB3	CTNND2	-0.491478	-0.0498774	-2.36671	0.0179482	0.168111
107	O60381	HBP1	-0.498702	0.01972	-2.36608	0.0179786	0.168111
217	P02792	FTL	-0.495753	-0.0295172	-2.36522	0.0180205	0.168111
110	O60610	DIAPH1	-0.49778	0.0218345	-2.36261	0.0181482	0.168111
1164	Q8TF61	FBXO41	-0.484518	-0.0647502	-2.3607	0.0182415	0.168111
1342	Q9H269	VPS16	-0.494471	-0.0333697	-2.36047	0.0182529	0.168111
881	Q14008	CKAP5	-0.495601	-0.00702847	-2.36003	0.0182746	0.168111
1076	Q86UR5	RIMS1	-0.484006	-0.0645371	-2.35783	0.0183831	0.168111
271	P07384	CAPN1	-0.488175	-0.0532684	-2.35715	0.0184173	0.168111
198	O95886	DLGAP3	-0.483704	-0.0623132	-2.35243	0.0186525	0.168111
1268	Q96SW2	CRBN	-0.496093	0.0152102	-2.3522	0.0186638	0.168111
1319	Q9BZV1	UBXN6	-0.476401	-0.0830432	-2.35014	0.0187677	0.168111
1019	Q6GYQ0	RALGAPA1	-0.492767	-0.0222025	-2.34976	0.0187866	0.168111
627	P52943	CRIP2	-0.4857	-0.0546781	-2.34784	0.0188838	0.168111
1050	Q7L099	RUFY3	-0.484578	-0.0556088	-2.34417	0.0190707	0.168111
82	O43432	EIF4G3	-0.485739	0.0649419	-2.34416	0.0190713	0.168111
920	Q15049	MLC1	-0.490912	-0.0302894	-2.34233	0.0191651	0.168111
1273	Q99490	AGAP2	-0.4746	-0.083245	-2.34154	0.0192055	0.168111
924	Q15120	PDK3	-0.490888	-0.00805294	-2.33805	0.0193858	0.168111
1179	Q8WZA2	RAPGEF4	-0.486146	-0.0479256	-2.33759	0.0194097	0.168111
1595	Q9Y6D5	ARFGEF2	-0.487317	-0.0434402	-2.3359	0.0194977	0.168111
175	O94967	WDR47	-0.489155	-0.03108	-2.33415	0.019589	0.168111
765	P78559	MAP1A	-0.485253	-0.0484086	-2.33413	0.0195903	0.168111
1266	Q96RR4	CAMKK2	-0.474664	-0.0776569	-2.33354	0.0196211	0.168111
1004	Q5TCZ1	SH3PXD2A	-0.47926	0.0803959	-2.33316	0.0196412	0.168111
1	A0AVT1	UBA6	-0.487125	0.0417098	-2.32534	0.0200549	0.168111
836	Q12933	TRAF2	-0.478553	-0.0598513	-2.32286	0.0201878	0.168111
1008	Q5VUB5	FAM171A1	-0.4784	-0.0593238	-2.32115	0.0202798	0.168111
1469	Q9UDT6	CLIP2	-0.483054	-0.0466719	-2.32057	0.0203112	0.168111
1308	Q9BW30	TPPP3	-0.477277	-0.0617609	-2.32016	0.0203334	0.168111
805	Q02952	AKAP12	-0.486323	-0.0255573	-2.3194	0.0203745	0.168111
562	P46379	BAG6	-0.476296	-0.0635016	-2.31849	0.0204238	0.168111
597	P49815	TSC2	-0.477189	-0.0610645	-2.31846	0.0204254	0.168111
522	P38117	ETFB	-0.488493	0.0061496	-2.31736	0.0204855	0.168111
589	P49419	ALDH7A1	-0.461518	-0.108703	-2.31598	0.0205604	0.168111
818	Q07157	TJP1	-0.475057	-0.0655441	-2.31597	0.0205612	0.168111
115	O60861	GAS7	-0.48012	-0.0511241	-2.31431	0.0206521	0.168111
1267	Q96SB3	PPP1R9B	-0.467683	-0.0875291	-2.31349	0.0206971	0.168111
1500	Q9UL25	RAB21	-0.476119	-0.060277	-2.31182	0.0207887	0.168111
1161	Q8TDJ6	DMXL2	-0.484119	-0.0257092	-2.30891	0.0209498	0.168111
1436	Q9NZ56	FMN2	-0.482868	-0.0380077	-2.30812	0.0209939	0.168111
542	P42345	MTOR	-0.484052	-0.012739	-2.30695	0.0210589	0.168111
1451	Q9P0V9	SEPTIN10	-0.474136	-0.0621996	-2.30569	0.0211291	0.168111
939	Q15388	TOMM20	-0.462961	-0.0964929	-2.30315	0.0212718	0.168111
532	P40855	PEX19	-0.478584	-0.0486487	-2.30245	0.021311	0.168111
1579	Q9Y4G8	RAPGEF2	-0.482663	-0.0256718	-2.30196	0.0213385	0.168111
655	P55196	AFDN	-0.4772	-0.0519488	-2.30174	0.0213511	0.168111
695	P61601	NCALD	-0.468075	-0.0769547	-2.30009	0.0214443	0.168111
943	Q15700	DLG2	-0.481461	-0.0330723	-2.29824	0.0215495	0.168111
671	P60201	PLP1	-0.479546	-0.0431257	-2.29822	0.0215505	0.168111
298	P09543	CNP	-0.477847	-0.0477453	-2.29738	0.0215985	0.168111
633	P53667	LIMK1	-0.468157	-0.0743906	-2.29653	0.0216468	0.168111
1449	Q9P0L0	VAPA	-0.474094	-0.0568357	-2.29571	0.0216938	0.168111
1263	Q96QG7	MTMR9	-0.472507	-0.0605575	-2.29479	0.0217462	0.168111
1190	Q92599	SEPTIN8	-0.473222	-0.0575628	-2.29283	0.0218594	0.168111
859	Q13492	PICALM	-0.475518	-0.0486139	-2.28765	0.0221594	0.168111
1505	Q9ULJ8	PPP1R9A	-0.468057	-0.0682742	-2.28637	0.022234	0.168111
1011	Q66K14	TBC1D9B	-0.475857	-0.0452249	-2.28356	0.0223986	0.168111
788	Q01082	SPTBN1	-0.478631	-0.0263797	-2.28281	0.0224426	0.168111
112	O60716	CTNND1	-0.462207	-0.0826452	-2.27956	0.0226352	0.168111
1049	Q7KZI7	MARK2	-0.470748	-0.0566673	-2.2792	0.0226566	0.168111
1578	Q9Y4G6	TLN2	-0.480511	0.0085257	-2.27848	0.0226995	0.168111
1577	Q9Y4F5	CEP170B	-0.465048	-0.0722886	-2.27803	0.022726	0.168111
1550	Q9Y2J8	PADI2	-0.475212	-0.0349804	-2.26922	0.0232563	0.168111
867	Q13557	CAMK2D	-0.465671	-0.0648679	-2.26907	0.0232653	0.168111
1118	Q8N3R9	PALS1	-0.472309	-0.0455911	-2.26715	0.0233825	0.168111
1527	Q9UQB8	BAIAP2	-0.463707	-0.0695015	-2.26706	0.0233877	0.168111
350	P14618	PKM	-0.469819	-0.0517298	-2.26574	0.0234684	0.168111
53	O14974	PPP1R12A	-0.462962	-0.0700853	-2.26434	0.0235543	0.168111
760	P78357	CNTNAP1	-0.466187	-0.0594918	-2.2622	0.0236865	0.168111
1180	Q92499	DDX1	-0.470358	-0.0419969	-2.25267	0.0242816	0.168111
1352	Q9H3S7	PTPN23	-0.47272	-0.0093104	-2.25203	0.024322	0.168111
1090	Q8IU85	CAMK1D	-0.461011	-0.0676978	-2.25105	0.024384	0.168111
1289	Q9BPU6	DPYSL5	-0.470531	-0.038312	-2.24942	0.0244869	0.168111
1182	Q92529	SHC3	-0.463203	-0.0597551	-2.24818	0.0245658	0.168111
60	O15075	DCLK1	-0.462003	-0.0619229	-2.2462	0.0246926	0.168111
94	O43707	ACTN4	-0.456499	-0.0788754	-2.24602	0.024704	0.168111
1371	Q9H9H5	MAP6D1	-0.455853	-0.0803902	-2.24506	0.0247655	0.168111
139	O75382	TRIM3	-0.468266	-0.0437924	-2.24505	0.0247661	0.168111
49	O14936	CASK	-0.470101	-0.0286091	-2.2426	0.0249237	0.168111
1518	Q9UPT5	EXOC7	-0.472499	0.00414651	-2.24247	0.0249322	0.168111
1151	Q8NFX7	STXBP6	-0.46917	-0.0361618	-2.24097	0.0250296	0.168111
58	O15020	SPTBN2	-0.472351	0.00831061	-2.23987	0.0251006	0.168111
815	Q07002	CDK18	-0.463985	-0.0528744	-2.23964	0.0251154	0.168111
1359	Q9H4G4	GLIPR2	-0.464867	-0.0495026	-2.2379	0.0252291	0.168111
1037	Q6UWE0	LRSAM1	-0.463126	-0.0541566	-2.23779	0.0252364	0.168111
980	Q4V328	GRIPAP1	-0.458184	-0.0679218	-2.23759	0.0252493	0.168111
1241	Q96JE9	MAP6	-0.467871	-0.0388693	-2.23722	0.0252736	0.168111
163	O76070	SNCG	-0.446005	-0.108069	-2.2371	0.0252814	0.168111
882	Q14012	CAMK1	-0.460226	-0.0612348	-2.23635	0.0253304	0.168111
1193	Q92736	RYR2	-0.46759	-0.0390651	-2.23605	0.0253502	0.168111
1378	Q9HBF4	ZFYVE1	-0.455902	-0.0733062	-2.23477	0.0254338	0.168111
1183	Q92552	MRPS27	-0.466903	-0.0408146	-2.23454	0.0254489	0.168111
1027	Q6P1M0	SLC27A4	-0.467192	-0.0394023	-2.23445	0.0254549	0.168111
1398	Q9NQW6	ANLN	-0.467835	-0.0287363	-2.23183	0.0256279	0.168111
538	P41743	PRKCI	-0.467555	-0.0309983	-2.23106	0.0256784	0.168111
222	P04075	ALDOA	-0.46753	-0.0242144	-2.22963	0.0257736	0.168111
1421	Q9NVE7	PANK4	-0.465081	-0.043487	-2.22938	0.02579	0.168111
1016	Q68DU8	KCTD16	-0.467654	-0.0149824	-2.22924	0.0257993	0.168111
1134	Q8N9F0	NAT8L	-0.461207	-0.0539778	-2.22819	0.025869	0.168111
1165	Q8WU79	SMAP2	-0.462657	-0.0494072	-2.22709	0.0259425	0.168111
161	O76024	WFS1	-0.467188	-0.0129073	-2.22662	0.0259741	0.168111
519	P36969	GPX4	-0.467188	-0.00463738	-2.22371	0.0261697	0.168111
1146	Q8NDA8	MROH1	-0.466419	-0.0166287	-2.2236	0.0261765	0.168111
987	Q5H9R7	PPP6R3	-0.465895	-0.0304727	-2.22301	0.0262166	0.168111
1521	Q9UPW8	UNC13A	-0.457524	-0.060207	-2.22141	0.0263244	0.168111
1507	Q9UM22	EPDR1	-0.467708	0.00205559	-2.22123	0.0263371	0.168111
79	O43301	HSPA12A	-0.457316	-0.0605884	-2.22107	0.0263476	0.168111
1069	Q7Z7E8	UBE2Q1	-0.465059	-0.0354666	-2.22094	0.0263565	0.168111
20	O00410	IPO5	-0.46647	0.0340066	-2.22059	0.02638	0.168111
1025	Q6NTF9	RHBDD2	-0.459496	-0.0538482	-2.2197	0.0264408	0.168111
568	P46821	MAP1B	-0.45781	-0.0580561	-2.21903	0.0264861	0.168111
239	P05090	APOD	-0.46414	-0.0382233	-2.21879	0.0265022	0.168111
1437	Q9NZB2	FAM120A	-0.463397	-0.0404143	-2.21723	0.026609	0.168111
1600	Q9Y6K8	AK5	-0.452813	-0.0710171	-2.21615	0.0266829	0.168111
876	Q13813	SPTAN1	-0.463671	-0.0375661	-2.21596	0.0266956	0.168111
758	P78352	DLG4	-0.453008	-0.069806	-2.21522	0.0267462	0.168111
1174	Q8WXD9	CASKIN1	-0.456155	-0.0595639	-2.21364	0.0268548	0.168111
540	P42262	GRIA2	-0.446677	-0.0902739	-2.21331	0.026878	0.168111
1409	Q9NS86	LANCL2	-0.463034	-0.0379184	-2.21323	0.0268831	0.168111
631	P53618	COPB1	-0.465419	-0.00136251	-2.21284	0.0269098	0.168111
1214	Q96A65	EXOC4	-0.463954	-0.0164171	-2.21182	0.0269804	0.168111
128	O75170	PPP6R2	-0.465118	0.0014345	-2.20936	0.0271508	0.168111
1117	Q8N3P4	VPS8	-0.461971	-0.0329	-2.20513	0.0274463	0.168111
1001	Q5T5U3	ARHGAP21	-0.461308	-0.0368813	-2.20405	0.027522	0.168111
1099	Q8IXI2	RHOT1	-0.462126	-0.0251354	-2.20396	0.0275287	0.168111
587	P49411	TUFM	-0.456864	-0.0520146	-2.20376	0.0275425	0.168111
892	Q14204	DYNC1H1	-0.462601	-0.00894329	-2.2037	0.0275466	0.168111
907	Q14764	MVP	-0.445631	-0.0857463	-2.202	0.0276665	0.168111
951	Q16352	INA	-0.446997	-0.0803701	-2.20142	0.0277079	0.168111
1261	Q96PY5	FMNL2	-0.454809	-0.0562541	-2.2013	0.0277163	0.168111
845	Q13085	ACACA	-0.461503	-0.0194935	-2.2005	0.0277731	0.168111
1097	Q8IWQ3	BRSK2	-0.458285	-0.0459658	-2.20044	0.0277773	0.168111
328	P11441	UBL4A	-0.443196	-0.0925254	-2.19915	0.027869	0.168111
672	P60484	PTEN	-0.443876	-0.0899628	-2.199	0.0278793	0.168111
374	P17812	CTPS1	-0.462774	0.0266422	-2.19882	0.027892	0.168111
603	P50395	GDI2	-0.455066	-0.0535162	-2.19771	0.0279712	0.168111
1576	Q9Y4F1	FARP1	-0.453619	-0.0549326	-2.19321	0.0282934	0.168111
98	O43815	STRN	-0.459769	-0.024235	-2.19262	0.0283363	0.168111
505	P35580	MYH10	-0.45289	-0.056339	-2.19216	0.0283694	0.168111
170	O94856	NFASC	-0.444333	-0.081073	-2.18929	0.0285775	0.168111
617	P51649	ALDH5A1	-0.449441	-0.0634789	-2.18773	0.0286906	0.168111
997	Q5T442	GJC2	-0.446946	-0.0708227	-2.18713	0.0287342	0.168111
1580	Q9Y4I1	MYO5A	-0.458525	-0.0275903	-2.18713	0.0287346	0.168111
495	P33121	ACSL1	-0.457524	0.0447592	-2.18678	0.0287601	0.168111
871	Q13613	MTMR1	-0.460847	0.00552335	-2.18646	0.0287832	0.168111
1064	Q7Z4S6	KIF21A	-0.453938	-0.048625	-2.18385	0.028975	0.168111
1035	Q6U841	SLC4A10	-0.443823	-0.0777017	-2.18198	0.0291125	0.168111
147	O75689	ADAP1	-0.459591	0.0209769	-2.18101	0.0291839	0.168111
1083	Q86XE0	SNX32	-0.457571	-0.0105747	-2.18019	0.0292452	0.168111
751	P68104	EEF1A1	-0.457046	-0.0278077	-2.18013	0.0292494	0.168111
643	P54652	HSPA2	-0.456665	-0.00960726	-2.17562	0.0295853	0.168111
1032	Q6PCB7	SLC27A1	-0.45567	-0.0131138	-2.17178	0.0298738	0.168111
1244	Q96JJ3	ELMO2	-0.453432	-0.041918	-2.1715	0.0298949	0.168111
753	P68371	TUBB4B	-0.455075	-0.0247509	-2.17029	0.0299867	0.168111
194	O95747	OXSR1	-0.445535	-0.0639797	-2.16953	0.0300442	0.168111
97	O43813	LANCL1	-0.454975	-0.0137416	-2.16861	0.0301135	0.168111
906	Q14738	PPP2R5D	-0.453933	-0.0353311	-2.16775	0.030179	0.168111
838	Q12959	DLG1	-0.454311	-0.0300408	-2.16763	0.0301885	0.168111
185	O95248	SBF1	-0.455584	-0.000996954	-2.16581	0.030327	0.168111
1101	Q8IXS6	PALM2AKAP2	-0.453909	-0.0167287	-2.16398	0.0304672	0.168111
1456	Q9P260	RELCH	-0.455022	-0.00116641	-2.16327	0.0305221	0.168111
545	P42704	LRPPRC	-0.45589	0.004922	-2.16319	0.030528	0.168111
95	O43759	SYNGR1	-0.436349	-0.0907311	-2.16275	0.0305619	0.168111
278	P08133	ANXA6	-0.449364	-0.0485026	-2.16164	0.0306471	0.168111
1272	Q99460	PSMD1	-0.455826	0.0111879	-2.16102	0.0306951	0.168111
879	Q13884	SNTB1	-0.452092	-0.0297171	-2.15696	0.0310099	0.168111
158	O75962	TRIO	-0.451894	-0.0326211	-2.15692	0.0310134	0.168111
33	O14523	C2CD2L	-0.438399	-0.0775755	-2.15514	0.0311527	0.168111
481	P31040	SDHA	-0.453341	-0.000533977	-2.15481	0.0311781	0.168111
1265	Q96RQ3	MCCC1	-0.452814	0.0319307	-2.15427	0.0312201	0.168111
969	Q17R89	ARHGAP44	-0.442538	-0.0634496	-2.15409	0.031235	0.168111
986	Q5FWE3	PRRT3	-0.44943	-0.0426179	-2.15324	0.0313016	0.168111
1598	Q9Y6G9	DYNC1LI1	-0.45147	-0.0207618	-2.15274	0.0313406	0.168111
18	O00401	WASL	-0.444608	-0.055924	-2.15136	0.0314497	0.168111
958	Q16653	MOG	-0.449275	-0.0416433	-2.15124	0.0314589	0.168111
6	A7KAX9	ARHGAP32	-0.451155	-0.0191563	-2.15113	0.0314672	0.168111
718	P62333	PSMC6	-0.453694	0.0104704	-2.15096	0.0314808	0.168111
22	O00471	EXOC5	-0.451968	-0.00186395	-2.14926	0.0316153	0.168111
746	P63167	DYNLL1	-0.45099	-0.0102555	-2.14875	0.0316561	0.168111
1305	Q9BUF5	TUBB6	-0.450555	-0.020269	-2.14835	0.0316877	0.168111
330	P11586	MTHFD1	-0.451044	-0.00444462	-2.14676	0.0318141	0.168111
1322	Q9C0H5	ARHGAP39	-0.440105	-0.065793	-2.14597	0.0318769	0.168111
807	Q03001	DST	-0.449853	-0.0131824	-2.14407	0.0320287	0.168111
1574	Q9Y4D1	DAAM1	-0.449107	-0.0310139	-2.14304	0.0321116	0.168111
1009	Q5VWJ9	SNX30	-0.441277	-0.0602779	-2.14265	0.0321429	0.168111
126	O75146	HIP1R	-0.449351	-0.0102432	-2.14093	0.0322808	0.168111
792	Q01813	PFKP	-0.449061	-0.0171623	-2.14093	0.0322811	0.168111
1015	Q684P5	RAP1GAP2	-0.450741	0.0061225	-2.13827	0.032496	0.168111
1108	Q8N122	RPTOR	-0.448037	-0.0293006	-2.13752	0.0325576	0.168111
1402	Q9NRD5	PICK1	-0.448902	-0.00236227	-2.13505	0.0327588	0.168111
1086	Q86YM7	HOMER1	-0.43485	-0.0756568	-2.13498	0.0327644	0.168111
1254	Q96P47	AGAP3	-0.437086	-0.0679895	-2.13466	0.0327906	0.168111
776	P86790	CCZ1B	-0.44801	-0.00598992	-2.13298	0.0329278	0.168111
78	O43295	SRGAP3	-0.447144	-0.0222902	-2.13221	0.032991	0.168111
1185	Q92558	WASF1	-0.44665	-0.0329869	-2.13203	0.0330056	0.168111
204	P00367	GLUD1	-0.447064	-0.02062	-2.13172	0.0330313	0.168111
67	O15394	NCAM2	-0.435944	-0.0693948	-2.13117	0.0330768	0.168111
778	Q00013	MPP1	-0.445562	-0.0327901	-2.12676	0.0334414	0.168111
195	O95757	HSPA4L	-0.446745	0.0330332	-2.12609	0.0334974	0.168111
1269	Q99250	SCN2A	-0.446333	-0.00685908	-2.12535	0.0335587	0.168111
1545	Q9Y2E4	DIP2C	-0.446033	-0.00392382	-2.12253	0.0337946	0.168111
774	P84095	RHOG	-0.442973	-0.0420635	-2.1216	0.0338733	0.168111
1530	Q9Y217	MTMR6	-0.433037	-0.0723556	-2.12132	0.0338965	0.168111
1014	Q674X7	KAZN	-0.41966	-0.118452	-2.12098	0.0339254	0.168111
669	P60033	CD81	-0.432605	-0.0732606	-2.1205	0.0339651	0.168111
269	P07339	CTSD	-0.444279	-0.0263032	-2.11897	0.034095	0.168111
1547	Q9Y2I8	WDR37	-0.440447	-0.0470203	-2.11644	0.0343093	0.168111
179	O95140	MFN2	-0.440557	-0.0456402	-2.11481	0.0344477	0.168111
1204	Q93008	USP9X	-0.442628	0.0416235	-2.11286	0.0346143	0.168111
1480	Q9UHD8	SEPTIN9	-0.440939	-0.0403628	-2.10971	0.034885	0.168111
1122	Q8N568	DCLK2	-0.442799	-0.00862307	-2.10924	0.0349254	0.168111
752	P68366	TUBA4A	-0.441218	-0.0291772	-2.10496	0.0352968	0.168111
203	P00338	LDHA	-0.431448	-0.0659342	-2.10397	0.0353822	0.168111
586	P49368	CCT3	-0.441142	-0.0201243	-2.10345	0.0354276	0.168111
1440	Q9NZQ3	NCKIPSD	-0.436662	-0.0498589	-2.10272	0.0354923	0.168111
1511	Q9UNM6	PSMD13	-0.441765	0.0324669	-2.10204	0.0355515	0.168111
998	Q5T4S7	UBR4	-0.441044	-0.00883056	-2.10096	0.0356456	0.168111
1042	Q6X4W1	NSMF	-0.437933	-0.0441907	-2.10013	0.0357192	0.168111
977	Q4G176	ACSF3	-0.440302	-0.0252068	-2.09988	0.0357407	0.168111
1038	Q6UWR7	ENPP6	-0.434168	-0.055182	-2.09959	0.0357668	0.168111
846	Q13131	PRKAA1	-0.437351	-0.0450037	-2.09843	0.0358684	0.168111
144	O75508	CLDN11	-0.437669	-0.0435977	-2.09812	0.0358963	0.168111
265	P07197	NEFM	-0.432343	-0.0585583	-2.09642	0.0360461	0.168111
1330	Q9H019	MTFR1L	-0.43809	-0.0400389	-2.0958	0.0361015	0.168111
572	P47756	CAPZB	-0.438672	-0.0227295	-2.09185	0.0364536	0.168111
1361	Q9H6K4	OPA3	-0.435291	-0.0470356	-2.09168	0.0364686	0.168111
499	P35222	CTNNB1	-0.435912	-0.0441148	-2.09034	0.0365888	0.168111
903	Q14643	ITPR1	-0.438546	-0.00740406	-2.08849	0.0367552	0.168111
39	O14578	CIT	-0.431529	-0.0550861	-2.08667	0.0369197	0.168111
1207	Q969E2	SCAMP4	-0.424703	-0.0764071	-2.08622	0.0369606	0.168111
992	Q5SQI0	ATAT1	-0.425016	-0.0747722	-2.08545	0.0370305	0.168111
16	O00305	CACNB4	-0.437072	-0.0294693	-2.08525	0.0370486	0.168111
1242	Q96JG6	VPS50	-0.438941	0.00306392	-2.08393	0.0371679	0.168111
1075	Q86UE4	MTDH	-0.419414	-0.0941485	-2.08327	0.0372286	0.168111
1431	Q9NY65	TUBA8	-0.431763	-0.050727	-2.08056	0.0374761	0.168111
1249	Q96L92	SNX27	-0.43753	-0.00152465	-2.08036	0.0374941	0.168111
592	P49588	AARS1	-0.437605	0.0263125	-2.07907	0.0376121	0.168111
913	Q14C86	GAPVD1	-0.431067	-0.0515906	-2.07863	0.0376532	0.168111
866	Q13555	CAMK2G	-0.435468	-0.0315565	-2.0781	0.0377017	0.168111
887	Q14166	TTLL12	-0.435415	-0.0245207	-2.0765	0.0378491	0.168111
1095	Q8IWA5	SLC44A2	-0.422479	-0.0766498	-2.07562	0.0379307	0.168111
1100	Q8IXJ6	SIRT2	-0.426307	-0.0637067	-2.07547	0.0379442	0.168111
1138	Q8N9N7	LRRC57	-0.429859	-0.0530522	-2.07521	0.0379687	0.168111
644	P54829	PTPN5	-0.42571	-0.0645381	-2.07384	0.0380953	0.168111
45	O14827	RASGRF2	-0.429968	-0.0504816	-2.0715	0.0383134	0.168111
28	O00571	DDX3X	-0.434746	-0.00907669	-2.07106	0.0383548	0.168111
145	O75521	ECI2	-0.425111	-0.0634736	-2.06929	0.0385202	0.168111
1575	Q9Y4E6	WDR7	-0.433753	-0.022302	-2.06836	0.0386082	0.168111
1318	Q9BZF1	OSBPL8	-0.425559	-0.0613375	-2.06806	0.0386362	0.168111
1243	Q96JH7	VCPIP1	-0.432555	-0.0366103	-2.06645	0.0387876	0.168111
207	P00533	EGFR	-0.43496	0.00125671	-2.06623	0.0388084	0.168111
193	O95741	CPNE6	-0.434694	0.00129796	-2.06494	0.0389304	0.168111
983	Q53GQ0	HSD17B12	-0.42349	-0.0639706	-2.06216	0.0391938	0.168111
1066	Q7Z6G8	ANKS1B	-0.422696	-0.0663773	-2.06197	0.0392119	0.168111
435	P25098	GRK2	-0.431045	-0.0270164	-2.05592	0.0397921	0.168111
1155	Q8TBX8	PIP4K2C	-0.430978	-0.0251377	-2.0554	0.0398416	0.168111
240	P05091	ALDH2	-0.4268	-0.0498994	-2.05529	0.0398528	0.168111
1415	Q9NTX5	ECHDC1	-0.430385	-0.0170734	-2.05188	0.0401827	0.168111
1391	Q9NPQ8	RIC8A	-0.429601	-0.0287479	-2.04943	0.0404215	0.168111
1353	Q9H425	C1orf198	-0.429289	-0.0322181	-2.04887	0.0404766	0.168111
1425	Q9NWV8	BABAM1	-0.414282	-0.086943	-2.04859	0.0405035	0.168111
865	Q13554	CAMK2B	-0.427617	-0.0406089	-2.04627	0.0407314	0.168111
286	P08670	VIM	-0.412658	-0.091039	-2.04572	0.0407858	0.168111
1556	Q9Y2X7	GIT1	-0.428407	-0.0326048	-2.04481	0.0408754	0.168111
280	P08237	PFKM	-0.428742	-0.0249104	-2.04472	0.040884	0.168111
1544	Q9Y2D4	EXOC6B	-0.430604	0.0233757	-2.04443	0.0409128	0.168111
1126	Q8N5S9	CAMKK1	-0.427279	-0.0403861	-2.04438	0.0409179	0.168111
118	O75044	SRGAP2	-0.429068	-0.00458257	-2.04224	0.0411292	0.168111
842	Q13033	STRN3	-0.425936	-0.0438672	-2.0422	0.0411332	0.168111
609	P50995	ANXA11	-0.428368	-0.0149278	-2.04196	0.0411568	0.168111
1346	Q9H2X9	SLC12A5	-0.428115	-0.0240533	-2.04164	0.0411886	0.168111
1357	Q9H4B0	OSGEPL1	-0.430477	0.00852492	-2.04123	0.0412299	0.168111
8	O00139	KIF2A	-0.43031	0.0163956	-2.04057	0.0412948	0.168111
1465	Q9UBM7	DHCR7	-0.43033	0.0158043	-2.04053	0.0412988	0.168111
252	P06241	FYN	-0.428601	-0.00472837	-2.04007	0.0413446	0.168111
1020	Q6H8Q1	ABLIM2	-0.427504	-0.03147	-2.04006	0.0413456	0.168111
543	P42356	PI4KA	-0.429195	0.00147106	-2.0387	0.0414816	0.168111
674	P60660	MYL6	-0.420465	-0.058155	-2.03818	0.0415336	0.168111
606	P50990	CCT8	-0.427177	-0.0252702	-2.03729	0.0416224	0.168111
369	P17252	PRKCA	-0.427047	-0.024714	-2.03662	0.0416902	0.168111
535	P40939	HADHA	-0.429029	0.00504834	-2.03569	0.0417835	0.168111
1583	Q9Y4P8	WIPI2	-0.426313	-0.0323805	-2.03473	0.0418801	0.168111
1483	Q9UHQ9	CYB5R1	-0.4165	-0.0674063	-2.03329	0.0420252	0.168111
810	Q05084	ICA1	-0.426907	-0.00575027	-2.03241	0.0421135	0.168111
636	P53779	MAPK10	-0.428116	0.00354028	-2.03223	0.0421323	0.168111
106	O60331	PIP5K1C	-0.423152	-0.0453108	-2.03077	0.0422804	0.168111
1602	Q9Y6R1	SLC4A4	-0.411175	-0.0847925	-2.03056	0.0423017	0.168111
577	P48426	PIP4K2A	-0.427805	0.020435	-2.02998	0.0423607	0.168111
1567	Q9Y3I0	RTCB	-0.425599	-0.015679	-2.02887	0.0424735	0.168111
541	P42263	GRIA3	-0.409724	-0.0881628	-2.02757	0.042606	0.168111
1317	Q9BZC7	ABCA2	-0.422995	-0.0366018	-2.02077	0.0433049	0.168111
537	P41252	IARS1	-0.425108	0.000575226	-2.01987	0.0433984	0.168111
1546	Q9Y2G0	EFR3B	-0.422816	-0.0144351	-2.01543	0.0438614	0.168111
171	O94874	UFL1	-0.422886	-0.0126165	-2.01541	0.0438636	0.168111
787	Q00839	HNRNPU	-0.416412	-0.0559329	-2.01494	0.043913	0.168111
397	P20916	MAG	-0.417295	-0.0521676	-2.01314	0.0441012	0.168111
563	P46459	NSF	-0.418926	-0.0465735	-2.01236	0.044184	0.168111
1604	Q9Y6V0	PCLO	-0.416849	-0.0527311	-2.01189	0.0442333	0.168111
790	Q01484	ANK2	-0.423439	0.00246054	-2.01072	0.0443563	0.168111
654	P55087	AQP4	-0.422087	-0.00773145	-2.01024	0.044408	0.168111
1285	Q99832	CCT7	-0.421835	-0.00953564	-2.00966	0.0444684	0.168111
140	O75390	CS	-0.421563	-0.0129983	-2.00919	0.0445184	0.168111
632	P53621	COPA	-0.423745	0.0141229	-2.00892	0.0445474	0.168111
11	O00186	STXBP3	-0.423748	0.0129956	-2.00884	0.0445563	0.168111
571	P47736	RAP1GAP	-0.421198	-0.0105113	-2.00686	0.0447662	0.168111
1061	Q7Z3J2	VPS35L	-0.420093	0.0424611	-2.00597	0.0448613	0.168111
1145	Q8NCB2	CAMKV	-0.410856	-0.0674699	-2.00582	0.0448768	0.168111
557	P43897	TSFM	-0.418491	-0.0426655	-2.00506	0.044958	0.168111
799	Q02338	BDH1	-0.420346	-0.0205083	-2.00432	0.0450378	0.168111
1172	Q8WW22	DNAJA4	-0.405294	-0.0868348	-2.00402	0.0450696	0.168111
1533	Q9Y263	PLAA	-0.422068	0.0222764	-2.00342	0.0451342	0.168111
1411	Q9NSE4	IARS2	-0.42168	0.0220609	-2.00149	0.0453409	0.168111
375	P17858	PFKL	-0.420484	-0.00401404	-2.00101	0.0453926	0.168111
1510	Q9UNA1	ARHGAP26	-0.421712	0.0050662	-2.00096	0.0453985	0.168111
854	Q13367	AP3B2	-0.419214	0.0397739	-1.9996	0.0455455	0.168111
368	P17174	GOT1	-0.406668	-0.0773871	-1.99891	0.0456202	0.168111
1566	Q9Y3F4	STRAP	-0.419139	-0.0182327	-1.99842	0.0456725	0.168111
1504	Q9ULH1	ASAP1	-0.419522	-0.0055626	-1.99718	0.045807	0.168111
942	Q15555	MAPRE2	-0.414183	-0.051461	-1.99701	0.045826	0.168111
480	P30626	SRI	-0.418698	-0.0237808	-1.99671	0.0458588	0.168111
493	P32189	GK	-0.405094	-0.0804604	-1.99517	0.0460261	0.168111
885	Q14155	ARHGEF7	-0.416749	-0.040982	-1.99471	0.0460764	0.168111
364	P16389	KCNA2	-0.411909	-0.0567884	-1.99451	0.0460977	0.168111
331	P12036	NEFH	-0.415883	-0.0441673	-1.99436	0.0461147	0.168111
848	Q13190	STX5	-0.417515	-0.0341899	-1.99341	0.0462181	0.168111
412	P22102	GART	-0.415498	0.0531848	-1.99338	0.0462215	0.168111
1410	Q9NSD9	FARSB	-0.417726	-0.0216641	-1.99189	0.0463844	0.168111
1408	Q9NRZ7	AGPAT3	-0.419935	0.017602	-1.99165	0.0464107	0.168111
768	P82663	MRPS25	-0.407576	-0.0686721	-1.99148	0.0464295	0.168111
814	Q06830	PRDX1	-0.412291	-0.0519052	-1.98859	0.0467483	0.168871
1407	Q9NRY4	ARHGAP35	-0.414055	-0.0456363	-1.98759	0.0468589	0.168871
77	O43272	PRODH	-0.418811	0.0188128	-1.98672	0.0469553	0.168871
1362	Q9H6U6	BCAS3	-0.415493	-0.0370571	-1.9853	0.0471129	0.169059
377	P17987	TCP1	-0.416622	-0.00099593	-1.98059	0.0476387	0.170208
614	P51570	GALK1	-0.415794	-0.00719627	-1.98006	0.0476988	0.170208
1582	Q9Y4P3	TBL2	-0.406317	-0.0637157	-1.97817	0.0479115	0.170208
743	P63096	GNAI1	-0.406092	-0.0643517	-1.97801	0.0479296	0.170208
1257	Q96PE3	INPP4A	-0.412956	0.0493398	-1.9777	0.0479638	0.170208
936	Q15366	PCBP2	-0.414526	0.038039	-1.976	0.0481568	0.170515
949	Q16181	SEPTIN7	-0.403789	-0.0677318	-1.97168	0.0486476	0.171874
54	O14976	GAK	-0.41258	-0.0282164	-1.96811	0.0490567	0.172838
1007	Q5VIR6	VPS53	-0.413423	-0.00403409	-1.96742	0.049136	0.172838
509	P35908	KRT2	-0.403383	-0.0649077	-1.96562	0.0493444	0.173038
1503	Q9ULD0	OGDHL	-0.414422	0.00861305	-1.96506	0.0494085	0.173038
1053	Q7L2E3	DHX30	-0.411587	-0.0267289	-1.96308	0.0496381	0.173135
908	Q147X3	NAA30	-0.409442	0.050852	-1.96222	0.0497392	0.173135
1247	Q96KG9	SCYL1	-0.410093	0.0470785	-1.96204	0.0497601	0.173135
264	P07196	NEFL	-0.402903	-0.0621633	-1.95924	0.050087	0.173895
1127	Q8N5V2	NGEF	-0.400921	-0.0674517	-1.9573	0.0503145	0.174086
565	P46779	RPL28	-0.394551	-0.091827	-1.95692	0.0503592	0.174086
409	P22033	MMUT	-0.396012	0.100981	-1.95172	0.0509727	0.175515
1079	Q86VU5	COMTD1	-0.410877	0.0234033	-1.95078	0.051085	0.175515
1307	Q9BVC4	MLST8	-0.408565	-0.0322909	-1.94998	0.05118	0.175515
1446	Q9P0J7	KCMF1	-0.406503	-0.0444717	-1.94973	0.0512101	0.175515
971	Q2M2I8	AAK1	-0.408837	-0.0130101	-1.94855	0.0513516	0.175596
1374	Q9HAR2	ADGRL3	-0.406841	-0.0400217	-1.9463	0.051621	0.175596
432	P24588	AKAP5	-0.408289	-0.010947	-1.94546	0.0517219	0.175596
872	Q13619	CUL4A	-0.410323	0.010189	-1.94536	0.051734	0.175596
1471	Q9UDY2	TJP2	-0.407804	-0.0259376	-1.94496	0.0517812	0.175596
1592	Q9Y678	COPG1	-0.40822	-0.00346876	-1.94229	0.052104	0.175896
339	P13591	NCAM1	-0.387355	-0.107213	-1.9417	0.0521752	0.175896
392	P20073	ANXA7	-0.406752	-0.0327698	-1.94151	0.0521987	0.175896
946	Q15878	CACNA1E	-0.402115	-0.0497469	-1.93618	0.0528471	0.17761
65	O15269	SPTLC1	-0.403642	-0.043697	-1.93511	0.0529784	0.17761
1120	Q8N414	PGBD5	-0.397192	-0.0643236	-1.93462	0.0530393	0.17761
1417	Q9NUQ2	AGPAT5	-0.396533	-0.065496	-1.93308	0.0532276	0.177691
1198	Q92900	UPF1	-0.40117	-0.0503879	-1.93262	0.0532852	0.177691
1005	Q5TF21	SOGA3	-0.405419	-0.00835088	-1.93108	0.0534749	0.177954
1144	Q8NCA5	FAM98A	-0.403623	-0.0390629	-1.93015	0.0535899	0.177967
214	P02686	MBP	-0.395598	-0.0648952	-1.92767	0.0538986	0.178623
453	P27635	RPL10	-0.391223	-0.0798021	-1.92602	0.0541034	0.178708
1327	Q9GZV7	HAPLN2	-0.403697	-0.0278922	-1.92567	0.0541472	0.178708
81	O43427	FIBP	-0.402799	-0.0262714	-1.92112	0.054718	0.180147
168	O94819	KBTBD11	-0.404758	0.0158447	-1.91928	0.0549503	0.180147
70	O15530	PDPK1	-0.40374	0.000832853	-1.91818	0.0550899	0.180147
1115	Q8N2K0	ABHD12	-0.400515	-0.0405535	-1.91652	0.0553011	0.180147
831	Q12756	KIF1A	-0.403971	0.0179105	-1.91601	0.0553654	0.180147
1046	Q71U36	TUBA1A	-0.401141	-0.028666	-1.91364	0.0556674	0.180147
2	A0FGR8	ESYT2	-0.402703	0.000234141	-1.91362	0.0556699	0.180147
513	P36507	MAP2K2	-0.401382	-0.00881028	-1.91202	0.0558752	0.180147
724	P62753	RPS6	-0.387869	-0.0811587	-1.91118	0.0559832	0.180147
1068	Q7Z6Z7	HUWE1	-0.402791	0.0201374	-1.91118	0.0559837	0.180147
954	Q16555	DPYSL2	-0.402951	0.011165	-1.91035	0.0560903	0.180147
442	P26232	CTNNA2	-0.400564	-0.0220838	-1.91008	0.0561244	0.180147
1412	Q9NT62	ATG3	-0.400396	-0.0195574	-1.90913	0.0562466	0.180147
1564	Q9Y3E5	PTRH2	-0.400268	-0.0178298	-1.9084	0.0563417	0.180147
215	P02689	PMP2	-0.399516	-0.036281	-1.90836	0.0563468	0.180147
47	O14908	GIPC1	-0.399956	-0.0291713	-1.9081	0.0563802	0.180147
1078	Q86VP6	CAND1	-0.394064	-0.0557594	-1.90653	0.0565829	0.180315
798	Q02252	ALDH6A1	-0.390451	0.0838312	-1.90467	0.0568244	0.180315
1259	Q96PU8	QKI	-0.399533	-0.015793	-1.90462	0.056831	0.180315
919	Q15048	LRRC14	-0.399675	-0.0101334	-1.90423	0.0568825	0.180315
1531	Q9Y224	RTRAF	-0.398122	-0.0372046	-1.90241	0.0571189	0.1805
1106	Q8N0X7	SPART	-0.399445	-0.00678434	-1.90205	0.0571659	0.1805
741	P63010	AP2B1	-0.398542	-0.0239405	-1.9006	0.0573559	0.180744
909	Q14832	GRM3	-0.397679	-0.0353307	-1.89911	0.0575519	0.180793
1306	Q9BV35	SLC25A23	-0.385036	-0.0823902	-1.89866	0.0576106	0.180793
1246	Q96JN2	CCDC136	-0.397876	-0.0264524	-1.89766	0.0577423	0.180793
1278	Q99683	MAP3K5	-0.397588	-0.0303597	-1.89706	0.0578223	0.180793
253	P06396	GSN	-0.397731	-0.0122577	-1.89544	0.0580354	0.181107
1384	Q9HD42	CHMP1A	-0.369934	-0.136028	-1.89338	0.0583093	0.181325
897	Q14318	FKBP8	-0.388044	-0.0665731	-1.89321	0.0583316	0.181325
1472	Q9UDY4	DNAJB4	-0.387857	-0.0652007	-1.89037	0.05871	0.182148
1460	Q9P2R3	ANKFY1	-0.396952	-0.00347255	-1.88868	0.0589368	0.182499
1350	Q9H3P7	ACBD3	-0.395889	-0.0138034	-1.88699	0.0591633	0.182613
782	Q00535	CDK5	-0.394878	-0.0369425	-1.88671	0.0592011	0.182613
703	P62140	PPP1CB	-0.397116	0.00612684	-1.88388	0.0595824	0.182782
952	Q16401	PSMD5	-0.394149	0.0444124	-1.88359	0.0596222	0.182782
1197	Q92777	SYN2	-0.394814	-0.0263718	-1.88305	0.0596956	0.182782
56	O14980	XPO1	-0.396558	0.0237105	-1.88293	0.059712	0.182782
309	P10586	PTPRF	-0.389353	-0.053751	-1.88071	0.0600135	0.183168
1255	Q96P70	IPO9	-0.396618	0.0112226	-1.88032	0.0600662	0.183168
1347	Q9H329	EPB41L4B	-0.380712	-0.0821241	-1.87703	0.060516	0.184189
993	Q5SSJ5	HP1BP3	-0.382467	-0.0729899	-1.8744	0.0608771	0.184723
1114	Q8N2F6	ARMC10	-0.38327	-0.0688737	-1.87298	0.0610724	0.184723
388	P19367	HK1	-0.392248	-0.03394	-1.87269	0.0611135	0.184723
1459	Q9P2P5	HECW2	-0.389508	-0.0470867	-1.87175	0.0612425	0.184723
1368	Q9H936	SLC25A22	-0.387478	-0.0536857	-1.87155	0.0612706	0.184723
520	P37235	HPCAL1	-0.388296	-0.0504319	-1.87066	0.0613939	0.184723
796	Q02218	OGDH	-0.394169	0.00609259	-1.86991	0.0614976	0.184723
376	P17980	PSMC3	-0.393701	0.00509816	-1.86804	0.0617583	0.184766
945	Q15811	ITSN1	-0.393244	0.00304367	-1.86699	0.0619048	0.184766
1202	Q92973	TNPO1	-0.389358	0.0488883	-1.86431	0.0622799	0.184766
346	P13804	ETFA	-0.391211	-0.0065785	-1.86277	0.0624962	0.184766
616	P51648	ALDH3A2	-0.392566	0.00572078	-1.86244	0.0625433	0.184766
146	O75534	CSDE1	-0.3892	-0.0403895	-1.86219	0.062578	0.184766
1554	Q9Y2S6	TMA7	-0.390306	-0.0296142	-1.86216	0.0625827	0.184766
1195	Q92747	ARPC1A	-0.392023	0.00300967	-1.86121	0.0627158	0.184766
211	P01857	IGHG1	-0.373742	-0.0976482	-1.86073	0.0627845	0.184766
780	Q00169	PITPNA	-0.39141	-0.000775197	-1.86059	0.0628036	0.184766
891	Q14203	DCTN1	-0.390401	0.0367317	-1.86011	0.0628712	0.184766
1238	Q96HU8	DIRAS2	-0.385667	-0.051756	-1.85995	0.062894	0.184766
1213	Q96A35	MRPL24	-0.381835	-0.062838	-1.85777	0.0632041	0.185013
135	O75363	BCAS1	-0.3896	-0.0208182	-1.85773	0.063209	0.185013
319	P11142	HSPA8	-0.388677	-0.0346169	-1.85587	0.0634736	0.185258
516	P36776	LONP1	-0.385357	0.0606414	-1.85552	0.0635238	0.185258
705	P62191	PSMC1	-0.390802	0.0171311	-1.85338	0.0638294	0.185812
855	Q13409	DYNC1I2	-0.388232	-0.0136483	-1.85047	0.064247	0.186169
1093	Q8IV38	ANKMY2	-0.383659	-0.0516231	-1.85007	0.064305	0.186169
197	O95831	AIFM1	-0.383529	-0.0507534	-1.84817	0.0645796	0.186169
673	P60520	GABARAPL2	-0.386545	-0.0377298	-1.84748	0.0646791	0.186169
1338	Q9H1K0	RBSN	-0.387313	-0.0133289	-1.84603	0.0648898	0.186169
963	Q16798	ME3	-0.375278	-0.0781257	-1.8455	0.0649664	0.186169
503	P35527	KRT9	-0.375132	-0.078622	-1.84538	0.0649838	0.186169
1131	Q8N6T3	ARFGAP1	-0.387213	-0.0117926	-1.84522	0.0650077	0.186169
474	P30086	PEBP1	-0.379464	-0.0619583	-1.84496	0.0650457	0.186169
638	P53992	SEC24C	-0.38901	0.0152251	-1.84448	0.0651153	0.186169
1571	Q9Y484	WDR45	-0.380672	-0.0570854	-1.8437	0.0652287	0.186169
916	Q15019	SEPTIN2	-0.380464	-0.0568089	-1.84229	0.0654351	0.186184
396	P20810	CAST	-0.365069	-0.115454	-1.84106	0.0656153	0.186184
501	P35240	NF2	-0.384611	-0.0405027	-1.84036	0.0657175	0.186184
100	O43854	EDIL3	-0.385998	-0.0174761	-1.84032	0.0657237	0.186184
547	P42858	HTT	-0.387398	0.0243261	-1.8397	0.0658144	0.186184
1520	Q9UPV7	PHF24	-0.382173	-0.0469733	-1.83635	0.0663075	0.186476
1572	Q9Y490	TLN1	-0.385264	-0.00635074	-1.83437	0.0666003	0.186476
41	O14617	AP3D1	-0.384284	0.0396648	-1.83291	0.0668172	0.186476
728	P62829	RPL23	-0.373731	-0.0740129	-1.83286	0.0668254	0.186476
933	Q15334	LLGL1	-0.381361	-0.0466828	-1.83206	0.0669442	0.186476
1524	Q9UQ16	DNM3	-0.383993	-0.0167652	-1.83067	0.0671522	0.186476
386	P19086	GNAZ	-0.383238	-0.0353568	-1.83016	0.0672282	0.186476
991	Q5QNW6	H2BC18	-0.383129	-0.0329358	-1.8288	0.0674307	0.186476
1496	Q9UJW0	DCTN4	-0.384925	0.0256705	-1.82852	0.0674732	0.186476
104	O60282	KIF5C	-0.383913	0.0354907	-1.82839	0.0674937	0.186476
1541	Q9Y2A7	NCKAP1	-0.383486	-0.0147548	-1.828	0.0675519	0.186476
688	P61221	ABCE1	-0.382803	-0.0345717	-1.82781	0.06758	0.186476
213	P02533	KRT14	-0.369292	-0.0876026	-1.82686	0.0677232	0.186476
1311	Q9BWS9	CHID1	-0.383194	-0.0144651	-1.82657	0.0677668	0.186476
351	P14621	ACYP2	-0.382596	-0.0334021	-1.82642	0.0677888	0.186476
899	Q14416	GRM2	-0.381477	-0.0411679	-1.82608	0.0678394	0.186476
1156	Q8TC12	RDH11	-0.383054	-0.0120222	-1.82545	0.0679354	0.186476
1586	Q9Y5K5	UCHL5	-0.381323	-0.0408007	-1.82495	0.0680104	0.186476
755	P68871	HBB	-0.352394	-0.150874	-1.82328	0.0682627	0.186849
1141	Q8NBU5	ATAD1	-0.375341	-0.0587747	-1.82034	0.0687099	0.187752
1041	Q6VY07	PACS1	-0.374134	-0.06067	-1.8172	0.069189	0.18854
870	Q13596	SNX1	-0.382934	0.00523783	-1.81691	0.0692333	0.18854
1250	Q96MC5	BMERB1	-0.382167	0.0239152	-1.81468	0.0695746	0.18901
1065	Q7Z4W1	DCXR	-0.37804	-0.044983	-1.81383	0.0697054	0.18901
579	P48556	PSMD8	-0.382423	0.0148962	-1.81318	0.0698064	0.18901
1169	Q8WVD5	RNF141	-0.379397	-0.0347968	-1.81162	0.0700461	0.18901
68	O15484	CAPN5	-0.373922	-0.0571714	-1.81114	0.0701218	0.18901
19	O00408	PDE2A	-0.378817	0.0448503	-1.81066	0.0701949	0.18901
1413	Q9NTJ5	SACM1L	-0.381104	0.0250686	-1.81012	0.0702796	0.18901
341	P13637	ATP1A3	-0.3709	-0.0666494	-1.80967	0.0703486	0.18901
190	O95670	ATP6V1G2	-0.377814	-0.0392906	-1.8069	0.07078	0.189851
1501	Q9UL26	RAB22A	-0.378554	-0.0251363	-1.80539	0.0710156	0.18987
761	P78371	CCT2	-0.378772	-0.013427	-1.80534	0.0710236	0.18987
359	P15531	NME1	-0.376073	-0.0436657	-1.80291	0.0714044	0.190495
75	O43237	DYNC1LI2	-0.377965	-0.0223202	-1.80233	0.0714949	0.190495
1279	Q99719	SEPTIN5	-0.377626	-0.0140633	-1.79998	0.0718665	0.191163
134	O75340	PDCD6	-0.365216	-0.0808598	-1.79923	0.071984	0.191163
895	Q14247	CTTN	-0.376273	-0.0335623	-1.79629	0.0724499	0.191651
1543	Q9Y2C4	EXOG	-0.372606	-0.0510139	-1.79591	0.0725114	0.191651
1283	Q99798	ACO2	-0.376742	-0.0144596	-1.79581	0.0725264	0.191651
1549	Q9Y2J2	EPB41L3	-0.375345	-0.0303594	-1.79093	0.0733067	0.192473
1379	Q9HCC0	MCCC2	-0.356693	-0.109291	-1.79072	0.0733398	0.192473
950	Q16204	CCDC6	-0.369865	0.0694279	-1.78931	0.0735664	0.192473
618	P51659	HSD17B4	-0.374532	-0.0348716	-1.78842	0.0737108	0.192473
937	Q15369	ELOC	-0.376342	0.0272198	-1.78839	0.0737143	0.192473
1237	Q96HS1	PGAM5	-0.363756	-0.0776989	-1.78834	0.0737229	0.192473
401	P21291	CSRP1	-0.374848	-0.0245834	-1.78767	0.0738318	0.192473
1192	Q92686	NRGN	-0.36331	-0.078811	-1.78745	0.0738674	0.192473
529	P40227	CCT6A	-0.374913	-0.0148293	-1.78714	0.0739173	0.192473
801	Q02543	RPL18A	-0.360548	-0.0896092	-1.78579	0.0741349	0.192674
929	Q15233	NONO	-0.372414	-0.0434871	-1.78518	0.0742349	0.192674
1340	Q9H1Z4	WDR13	-0.373803	-0.0220334	-1.78247	0.0746746	0.193471
965	Q16836	HADH	-0.372952	-0.0365666	-1.78168	0.0748037	0.193471
759	P78356	PIP4K2B	-0.374926	0.0248845	-1.7807	0.0749637	0.193471
25	O00487	PSMD14	-0.375171	0.0207655	-1.78033	0.0750244	0.193471
1060	Q7Z3C6	ATG9A	-0.374374	0.0262533	-1.77864	0.0753008	0.193599
258	P06748	NPM1	-0.370674	-0.0440158	-1.7774	0.0755048	0.193599
1458	Q9P2J5	LARS1	-0.374182	0.00294894	-1.77655	0.0756449	0.193599
1313	Q9BXM9	FSD1L	-0.374307	0.0210973	-1.77633	0.0756801	0.193599
487	P31930	UQCRC1	-0.372299	-0.0231965	-1.77538	0.0758364	0.193599
1040	Q6UXV4	APOOL	-0.367757	-0.052445	-1.77455	0.0759742	0.193599
390	P19525	EIF2AK2	-0.36906	-0.0474977	-1.77403	0.0760597	0.193599
313	P10644	PRKAR1A	-0.372262	-0.0105069	-1.7737	0.0761152	0.193599
556	P43686	PSMC4	-0.37347	0.0232453	-1.77311	0.0762118	0.193599
652	P55072	VCP	-0.371282	-0.0342607	-1.7727	0.076281	0.193599
176	O94973	AP2A2	-0.372568	-0.0008785	-1.77109	0.0765473	0.193968
322	P11182	DBT	-0.370973	-0.0191847	-1.76882	0.0769256	0.194362
1447	Q9P0K1	ADAM22	-0.370666	-0.0238056	-1.76765	0.0771213	0.194362
1442	Q9NZW5	PALS2	-0.369884	0.0443771	-1.7676	0.0771294	0.194362
1400	Q9NR31	SAR1A	-0.370621	-0.0117483	-1.76614	0.0773742	0.194362
620	P51798	CLCN7	-0.371763	0.00145413	-1.7659	0.0774138	0.194362
981	Q504Y0	SLC39A12	-0.360525	0.0906092	-1.76581	0.0774296	0.194362
507	P35611	ADD1	-0.370236	-0.0120229	-1.76436	0.0776729	0.194668
196	O95782	AP2A1	-0.370297	-0.00410646	-1.76224	0.0780315	0.195217
888	Q14168	MPP2	-0.365298	-0.0510512	-1.76073	0.0782853	0.195217
596	P49802	RGS7	-0.370038	-0.00259907	-1.7601	0.0783932	0.195217
740	P63000	RAC1	-0.36621	-0.0471417	-1.75987	0.0784321	0.195217
811	Q05193	DNM1	-0.369205	-0.0121044	-1.75947	0.0785004	0.195217
875	Q13724	MOGS	-0.368699	-0.0206971	-1.75806	0.0787388	0.195313
247	P05386	RPLP1	-0.363333	-0.0552615	-1.75715	0.0788941	0.195313
712	P62266	RPS23	-0.354122	-0.0924591	-1.75709	0.0789047	0.195313
511	P36404	ARL2	-0.369534	0.000357576	-1.75593	0.0791015	0.195499
1029	Q6P1Q0	LETMD1	-0.360072	-0.0653813	-1.75519	0.079229	0.195513
473	P30085	CMPK1	-0.369918	0.0118293	-1.75371	0.0794821	0.195728
749	P67775	PPP2CA	-0.361163	0.0755214	-1.75326	0.0795601	0.195728
87	O43617	TRAPPC3	-0.357284	-0.0715161	-1.74922	0.0802552	0.196895
607	P50991	CCT4	-0.367222	-0.00457713	-1.74787	0.0804881	0.196895
166	O94811	TPPP	-0.368624	0.0117666	-1.74758	0.0805394	0.196895
583	P48735	IDH2	-0.365492	0.0454725	-1.74744	0.0805629	0.196895
935	Q15365	PCBP1	-0.368494	0.0120081	-1.74695	0.0806483	0.196895
83	O43491	EPB41L2	-0.367653	0.00436806	-1.74475	0.0810295	0.197525
849	Q13200	PSMD2	-0.366396	0.0323355	-1.74335	0.081275	0.197568
1529	Q9UQN3	CHMP2B	-0.354811	-0.0767124	-1.74324	0.0812935	0.197568
342	P13639	EEF2	-0.367381	0.00748756	-1.74238	0.0814441	0.197634
684	P61158	ACTR3	-0.366481	0.0269025	-1.7414	0.0816149	0.19775
484	P31153	MAT2A	-0.365394	0.0314256	-1.73811	0.0821927	0.198605
862	Q13509	TUBB3	-0.366495	0.00846886	-1.73786	0.0822378	0.198605
1276	Q99613	EIF3C	-0.350799	0.108939	-1.7372	0.0823542	0.198605
358	P15311	EZR	-0.366093	0.0140039	-1.73557	0.0826415	0.198605
1177	Q8WXS5	CACNG8	-0.349389	-0.0942068	-1.73551	0.0826521	0.198605
496	P34897	SHMT2	-0.365324	0.0027023	-1.73463	0.0828086	0.198605
1553	Q9Y2Q3	GSTK1	-0.351824	0.101492	-1.73448	0.0828348	0.198605
38	O14576	DYNC1I1	-0.362421	-0.0390412	-1.7331	0.0830792	0.198894
236	P05023	ATP1A1	-0.351054	-0.082623	-1.73134	0.0833928	0.19927
722	P62745	RHOB	-0.353435	-0.0718885	-1.73083	0.0834847	0.19927
1292	Q9BQ69	MACROD1	-0.352849	0.0921389	-1.7298	0.0836682	0.199378
1089	Q86YZ3	HRNR	-0.351661	-0.0779676	-1.72918	0.0837787	0.199378
244	P05166	PCCB	-0.361653	-0.0334818	-1.72647	0.084265	0.199652
85	O43583	DENR	-0.36391	0.0116044	-1.72524	0.0844869	0.199652
927	Q15173	PPP2R5B	-0.363755	0.0111565	-1.72453	0.0846146	0.199652
1517	Q9UPR5	SLC8A2	-0.36215	-0.0066727	-1.72443	0.0846328	0.199652
1304	Q9BTW9	TBCD	-0.363155	0.022678	-1.72391	0.0847255	0.199652
1573	Q9Y496	KIF3A	-0.358117	-0.0492836	-1.7237	0.0847642	0.199652
584	P49207	RPL34	-0.354581	-0.0617517	-1.72369	0.0847651	0.199652
1570	Q9Y450	HBS1L	-0.361909	-0.00354045	-1.72199	0.085074	0.199755
1358	Q9H4G0	EPB41L1	-0.362192	-0.000889756	-1.72177	0.0851128	0.199755
988	Q5HYI7	MTX3	-0.361026	-0.0191031	-1.72139	0.0851824	0.199755
1072	Q86TP1	PRUNE1	-0.362161	0.00245405	-1.71974	0.085481	0.200163
1385	Q9NNW7	TXNRD2	-0.36215	0.0142984	-1.71694	0.0859927	0.201068
472	P30084	ECHS1	-0.361114	0.00132212	-1.71539	0.0862748	0.20131
1000	Q5T5P2	KIAA1217	-0.353769	-0.0582475	-1.715	0.0863475	0.20131
828	Q08AM6	VAC14	-0.360234	0.0325276	-1.71412	0.0865079	0.201391
1010	Q5XKP0	MICOS13	-0.355665	-0.0486263	-1.71106	0.0870712	0.202151
407	P21926	CD9	-0.350888	-0.0650255	-1.70997	0.0872731	0.202151
902	Q14642	INPP5A	-0.351299	-0.0631584	-1.7096	0.087341	0.202151
551	P43155	CRAT	-0.359258	-0.00387559	-1.70957	0.0873474	0.202151
302	P09972	ALDOC	-0.360212	0.00574015	-1.70894	0.0874643	0.202151
678	P60953	CDC42	-0.357073	-0.0385904	-1.70722	0.0877837	0.202373
1240	Q96JB5	CDK5RAP3	-0.358174	-0.0120943	-1.70689	0.0878436	0.202373
554	P43487	RANBP1	-0.358537	0.0327172	-1.70614	0.0879835	0.202373
757	P78344	EIF4G2	-0.359337	0.0192867	-1.70474	0.0882454	0.202373
459	P28331	NDUFS1	-0.357646	-0.0120292	-1.70437	0.0883145	0.202373
1092	Q8IV01	SYT12	-0.345781	-0.0816041	-1.70427	0.0883334	0.202373
762	P78406	RAE1	-0.357775	-0.00576203	-1.70329	0.0885151	0.202373
666	P57088	TMEM33	-0.356974	-0.0289651	-1.703	0.0885696	0.202373
536	P41222	PTGDS	-0.35632	-0.0271498	-1.69954	0.0892202	0.202552
1057	Q7RTN6	STRADA	-0.354348	-0.0444103	-1.69951	0.0892242	0.202552
380	P18433	PTPRA	-0.356103	0.0402658	-1.6989	0.0893397	0.202552
228	P04264	KRT1	-0.344275	-0.0833173	-1.69863	0.0893908	0.202552
1301	Q9BSJ8	ESYT1	-0.357795	0.0228374	-1.69853	0.089409	0.202552
1388	Q9NP81	SARS2	-0.352225	0.063447	-1.69849	0.0894182	0.202552
1201	Q92932	PTPRN2	-0.357706	0.00838037	-1.69621	0.0898488	0.202552
283	P08247	SYP	-0.342024	-0.0912848	-1.69582	0.0899226	0.202552
1394	Q9NQ79	CRTAC1	-0.354069	-0.041899	-1.69563	0.0899581	0.202552
1464	Q9UBC2	EPS15L1	-0.356815	0.000492462	-1.69542	0.0899971	0.202552
676	P60866	RPS20	-0.342989	-0.0856465	-1.69471	0.0901317	0.202552
1215	Q96AG4	LRRC59	-0.354936	-0.033929	-1.69455	0.0901634	0.202552
648	P55011	SLC12A2	-0.35506	-0.0265067	-1.69346	0.0903707	0.202734
1110	Q8N145	LGI3	-0.344177	-0.0783252	-1.69278	0.0904997	0.20274
333	P12235	SLC25A4	-0.348345	-0.0593738	-1.6902	0.0909907	0.203535
1149	Q8NFP9	NBEA	-0.353597	-0.0365258	-1.68919	0.0911853	0.203535
1171	Q8WVM8	SCFD1	-0.352315	0.0514893	-1.68893	0.0912353	0.203535
1367	Q9H8M1	COQ10B	-0.353867	-0.0124384	-1.68644	0.0917138	0.203685
1355	Q9H479	FN3K	-0.355688	0.0125701	-1.68621	0.0917576	0.203685
1393	Q9NQ66	PLCB1	-0.342426	0.0985524	-1.68517	0.0919582	0.203685
523	P38606	ATP6V1A	-0.353359	-0.0212095	-1.68494	0.0920015	0.203685
940	Q15436	SEC23A	-0.354984	0.00388579	-1.68489	0.0920115	0.203685
1535	Q9Y277	VDAC3	-0.351387	-0.0433085	-1.6842	0.0921445	0.203685
249	P05388	RPLP0	-0.339963	-0.0897298	-1.68396	0.0921915	0.203685
1325	Q9GZS3	WDR61	-0.347839	-0.0553655	-1.68236	0.0925009	0.203803
510	P35998	PSMC2	-0.354222	0.0231719	-1.6817	0.0926292	0.203803
578	P48444	ARCN1	-0.353992	0.00128168	-1.68158	0.0926514	0.203803
717	P62330	ARF6	-0.351325	-0.038977	-1.68	0.092959	0.203803
263	P07195	LDHB	-0.335826	-0.104376	-1.67991	0.0929762	0.203803
1519	Q9UPT6	MAPK8IP3	-0.352209	-0.025219	-1.67975	0.0930074	0.203803
336	P12931	SRC	-0.351963	-0.0130649	-1.67749	0.0934487	0.204407
1284	Q99816	TSG101	-0.344628	-0.0627717	-1.67666	0.0936112	0.204407
419	P22830	FECH	-0.35117	-0.0328256	-1.67622	0.0936967	0.204407
566	P46781	RPS9	-0.33679	-0.0964252	-1.6754	0.0938587	0.204407
640	P54136	RARS1	-0.351956	0.0332357	-1.67508	0.0939201	0.204407
119	O75061	DNAJC6	-0.350474	0.0429427	-1.67386	0.0941604	0.204652
201	O96008	TOMM40	-0.347022	-0.0488961	-1.66982	0.0949572	0.205895
348	P14136	GFAP	-0.350666	-0.0064116	-1.66966	0.094989	0.205895
890	Q14195	DPYSL3	-0.350249	-0.00842343	-1.66832	0.0952536	0.20619
142	O75431	MTX2	-0.343569	-0.058074	-1.66532	0.0958508	0.206817
212	P02511	CRYAB	-0.343526	-0.0580227	-1.66505	0.0959055	0.206817
1251	Q96MZ0	GDAP1L1	-0.349627	0.0341228	-1.66443	0.0960282	0.206817
344	P13647	KRT5	-0.337452	-0.0816967	-1.66331	0.0962531	0.206817
192	O95721	SNAP29	-0.348619	-0.028445	-1.66305	0.0963049	0.206817
1209	Q969L2	MAL2	-0.34242	-0.0605406	-1.66299	0.0963168	0.206817
1142	Q8NBX0	SCCPDH	-0.342484	-0.0595884	-1.66205	0.0965044	0.206943
1234	Q96GC9	VMP1	-0.348335	-0.021362	-1.66099	0.0967168	0.207121
172	O94910	ADGRL1	-0.348002	-0.0234071	-1.65954	0.0970094	0.207471
889	Q14194	CRMP1	-0.349301	0.0197191	-1.65725	0.0974703	0.208179
1312	Q9BXF6	RAB11FIP5	-0.348993	0.0217141	-1.65638	0.0976463	0.208267
1051	Q7L0J3	SV2A	-0.341367	-0.0585105	-1.65522	0.0978814	0.208267
675	P60709	ACTB	-0.348569	0.00346162	-1.65467	0.0979938	0.208267
580	P48643	CCT5	-0.347081	-0.0149761	-1.65449	0.098031	0.208267
745	P63151	PPP2R2A	-0.348291	0.0126701	-1.65114	0.0987125	0.209331
1229	Q96F07	CYFIP2	-0.346434	-0.0110641	-1.65074	0.0987928	0.209331
476	P30153	PPP2R1A	-0.344646	0.0474807	-1.6492	0.0991085	0.209723
844	Q13057	COASY	-0.344886	-0.0344533	-1.64673	0.0996157	0.210176
985	Q5D862	FLG2	-0.335811	-0.0734613	-1.64627	0.0997094	0.210176
715	P62280	RPS11	-0.337207	-0.0668412	-1.64551	0.0998666	0.210176
477	P30405	PPIF	-0.343829	0.0472714	-1.64514	0.0999431	0.210176
89	O43670	ZNF207	-0.34487	-0.0274139	-1.64497	0.0999776	0.210176
721	P62714	PPP2CB	-0.343373	0.0463757	-1.64232	0.100525	0.210276
813	Q05639	EEF1A2	-0.345809	0.0242286	-1.64216	0.100559	0.210276
706	P62195	PSMC5	-0.346043	0.00487054	-1.64198	0.100595	0.210276
1438	Q9NZJ7	MTCH1	-0.342043	-0.0447348	-1.64082	0.100837	0.210276
594	P49674	CSNK1E	-0.343596	-0.0342461	-1.64051	0.100902	0.210276
1380	Q9HCD6	TANC2	-0.337546	-0.0611957	-1.64016	0.100973	0.210276
989	Q5JPH6	EARS2	-0.344057	-0.0154428	-1.64012	0.100981	0.210276
973	Q330K2	NDUFAF6	-0.343944	-0.0162617	-1.63968	0.101074	0.210276
1603	Q9Y6T7	DGKB	-0.336537	-0.0641419	-1.63896	0.101223	0.210314
490	P31948	STIP1	-0.341055	0.0552166	-1.63781	0.101462	0.210451
304	P0DMV9	HSPA1B	-0.343402	-0.0142671	-1.63687	0.10166	0.210451
904	Q14694	USP10	-0.343306	-0.0173195	-1.63676	0.101683	0.210451
235	P04899	GNAI2	-0.343392	-0.00864861	-1.63573	0.101898	0.210546
911	Q14974	KPNB1	-0.338768	0.0654054	-1.63528	0.101992	0.210546
928	Q15185	PTGES3	-0.342972	-0.0070206	-1.63322	0.102425	0.21117
14	O00232	PSMD12	-0.343329	0.00355183	-1.62975	0.103157	0.21223
650	P55039	DRG2	-0.34355	0.018204	-1.62952	0.103204	0.21223
611	P51149	RAB7A	-0.337531	-0.0489625	-1.62423	0.104329	0.214019
1233	Q96FZ7	CHMP6	-0.34148	-0.00244248	-1.62417	0.104341	0.214019
686	P61163	ACTR1A	-0.341876	0.019332	-1.62191	0.104825	0.214066
1024	Q6L8Q7	PDE12	-0.329292	0.0993124	-1.62127	0.104961	0.214066
1548	Q9Y2J0	RPH3A	-0.32915	-0.0803966	-1.62106	0.105006	0.214066
719	P62424	RPL7A	-0.326648	-0.0923109	-1.62062	0.105102	0.214066
1487	Q9UI15	TAGLN3	-0.338335	-0.0419868	-1.62037	0.105156	0.214066
900	Q14457	BECN1	-0.337225	-0.0469296	-1.62032	0.105165	0.214066
3	A0MZ66	SHTN1	-0.341124	0.022068	-1.61914	0.105419	0.214312
1466	Q9UBP0	SPAST	-0.339644	-0.0110744	-1.61839	0.10558	0.214367
555	P43490	NAMPT	-0.335897	-0.0494851	-1.61701	0.105879	0.214403
427	P23634	ATP2B4	-0.338694	-0.0333634	-1.61683	0.105916	0.214403
1484	Q9UHV9	PFDN2	-0.340066	-0.00063824	-1.61645	0.105999	0.214403
13	O00231	PSMD11	-0.340197	0.0229208	-1.61502	0.106308	0.214636
527	P40121	CAPG	-0.335791	0.0574603	-1.61428	0.106468	0.214636
216	P02768	ALB	-0.312438	-0.148183	-1.61332	0.106677	0.214636
413	P22234	PAICS	-0.338243	-0.0159922	-1.61247	0.106862	0.214636
1337	Q9H1E5	TMX4	-0.338275	0.0353841	-1.61098	0.107186	0.214636
880	Q13885	TUBB2A	-0.337219	-0.0360481	-1.61063	0.107261	0.214636
466	P29992	GNA11	-0.339161	0.0226482	-1.61	0.107399	0.214636
1376	Q9HB21	PLEKHA1	-0.334996	-0.0472515	-1.61	0.1074	0.214636
417	P22695	UQCRC2	-0.337066	-0.0359529	-1.60984	0.107434	0.214636
448	P27144	AK4	-0.339178	0.0215797	-1.60976	0.107452	0.214636
436	P25398	RPS12	-0.334641	-0.0438761	-1.60448	0.10861	0.216679
378	P18077	RPL35A	-0.325256	-0.080227	-1.60171	0.109223	0.217631
1416	Q9NUB1	ACSS1	-0.332242	0.0588116	-1.5983	0.109978	0.218373
1432	Q9NYB9	ABI2	-0.334885	-0.0319546	-1.59823	0.109994	0.218373
1210	Q969P0	IGSF8	-0.326062	-0.073192	-1.59819	0.110003	0.218373
528	P40123	CAP2	-0.329716	-0.0571791	-1.59702	0.110262	0.218432
668	P59998	ARPC4	-0.336323	0.00288779	-1.59683	0.110305	0.218432
1406	Q9NRW7	VPS45	-0.335582	0.0230262	-1.59315	0.111128	0.219535
1205	Q93009	USP7	-0.332298	0.0516954	-1.59312	0.111136	0.219535
404	P21589	NT5E	-0.32318	-0.0808398	-1.59212	0.11136	0.219706
492	P32119	PRDX2	-0.331002	-0.0470763	-1.5906	0.111702	0.220111
62	O15083	ERC2	-0.324105	-0.0723292	-1.58767	0.112364	0.221076
730	P62857	RPS28	-0.323978	-0.0724808	-1.58721	0.112468	0.221076
1067	Q7Z6L0	PRRT2	-0.318188	-0.0987942	-1.58537	0.112884	0.221532
1059	Q7Z3B1	NEGR1	-0.324042	-0.0701578	-1.58497	0.112976	0.221532
526	P39023	RPL3	-0.318798	-0.0941766	-1.58352	0.113304	0.221904
841	Q13011	ECH1	-0.324107	-0.0667281	-1.58145	0.113777	0.222558
160	O76003	GLRX3	-0.331393	0.0392211	-1.58038	0.114021	0.222615
117	O60890	OPHN1	-0.331393	-0.00811037	-1.57841	0.114474	0.222615
1121	Q8N4Q0	ZADH2	-0.332371	0.0230272	-1.57791	0.114588	0.222615
1420	Q9NVA2	SEPTIN11	-0.323315	-0.0664557	-1.57727	0.114735	0.222615
1356	Q9H492	MAP1LC3A	-0.322765	-0.0688161	-1.57724	0.114742	0.222615
1502	Q9ULC3	RAB23	-0.329711	-0.0387628	-1.57651	0.114911	0.222615
707	P62241	RPS8	-0.319602	-0.0821486	-1.57576	0.115082	0.222615
1256	Q96PB7	OLFM3	-0.313647	-0.109976	-1.57541	0.115164	0.222615
553	P43378	PTPN9	-0.330329	-0.025072	-1.57539	0.115169	0.222615
1523	Q9UQ03	CORO2B	-0.332007	0.0200098	-1.57528	0.115194	0.222615
585	P49327	FASN	-0.324942	0.0704384	-1.57288	0.115748	0.222937
152	O75899	GABBR2	-0.322564	-0.0650751	-1.572	0.115954	0.222937
353	P14649	MYL6B	-0.329208	-0.0336132	-1.57162	0.11604	0.222937
1452	Q9P121	NTM	-0.318859	-0.0813705	-1.57135	0.116104	0.222937
373	P17677	GAP43	-0.325263	-0.0537724	-1.57116	0.116148	0.222937
1534	Q9Y265	RUVBL1	-0.329441	-0.0225784	-1.57096	0.116194	0.222937
785	Q00688	FKBP3	-0.323874	-0.0577279	-1.56942	0.116552	0.223124
797	Q02246	CNTN2	-0.322881	-0.0602928	-1.56779	0.116932	0.223124
534	P40926	MDH2	-0.329155	-0.00622295	-1.56718	0.117074	0.223124
517	P36915	GNL1	-0.328706	-0.014158	-1.56681	0.117162	0.223124
1324	Q9GZN7	ROGDI	-0.326398	-0.0455214	-1.56668	0.117192	0.223124
1422	Q9NVH1	DNAJC11	-0.325184	-0.0502086	-1.56634	0.117272	0.223124
355	P14868	DARS1	-0.330321	0.01481	-1.56613	0.11732	0.223124
830	Q10567	AP1B1	-0.327024	0.0487829	-1.56577	0.117404	0.223124
343	P13645	KRT10	-0.319357	-0.0730334	-1.56516	0.117548	0.223133
1365	Q9H845	ACAD9	-0.327732	-0.0300205	-1.56369	0.117893	0.223523
1489	Q9UID3	VPS51	-0.327667	-0.010339	-1.56119	0.118482	0.224374
645	P54886	ALDH18A1	-0.328406	0.00419921	-1.55859	0.119097	0.225272
421	P23284	PPIB	-0.326761	-0.0113129	-1.55705	0.11946	0.225547
533	P40925	MDH1	-0.315296	-0.0840395	-1.55634	0.119629	0.225547
48	O14910	LIN7A	-0.326329	-0.0166586	-1.55574	0.119771	0.225547
303	P0CG08	GPR89B	-0.326214	-0.0104391	-1.55428	0.120119	0.225547
1429	Q9NXC2	GFOD1	-0.326217	-0.0100068	-1.55422	0.120135	0.225547
626	P52907	CAPZA1	-0.323325	-0.047328	-1.55399	0.120188	0.225547
1281	Q99747	NAPG	-0.325363	-0.0339763	-1.55337	0.120337	0.225547
406	P21912	SDHB	-0.309067	-0.110103	-1.55255	0.120533	0.225547
819	Q07955	SRSF1	-0.326756	0.00148768	-1.5521	0.12064	0.225547
1107	Q8N111	CEND1	-0.325465	-0.0234504	-1.55207	0.120648	0.225547
332	P12081	HARS1	-0.324209	0.0468639	-1.55099	0.120906	0.225614
1274	Q99497	PARK7	-0.320676	-0.0545578	-1.54998	0.121149	0.225614
1153	Q8TB36	GDAP1	-0.325089	-0.0149925	-1.54966	0.121226	0.225614
662	P56192	MARS1	-0.326793	0.0157433	-1.54957	0.121247	0.225614
360	P15880	RPS2	-0.311011	-0.0966745	-1.54741	0.121766	0.22592
340	P13611	VCAN	-0.324352	-0.0276263	-1.54714	0.121831	0.22592
1070	Q86SK9	SCD5	-0.324384	-0.020362	-1.54674	0.121928	0.22592
725	P62760	VSNL1	-0.321778	-0.0473169	-1.54655	0.121974	0.22592
471	P30050	RPL12	-0.311831	-0.0899977	-1.54487	0.12238	0.22641
685	P61160	ACTR2	-0.323638	-0.00624689	-1.54092	0.123338	0.227919
1477	Q9UH03	SEPTIN3	-0.322825	-0.0157239	-1.53894	0.123821	0.228208
108	O60493	SNX3	-0.319494	-0.0498293	-1.53847	0.123937	0.228208
51	O14950	MYL12B	-0.316523	-0.0612718	-1.5381	0.124025	0.228208
968	Q16891	IMMT	-0.313701	-0.0735252	-1.53795	0.124063	0.228208
167	O94817	ATG12	-0.319172	0.0592705	-1.53578	0.124594	0.228706
1150	Q8NFV4	ABHD11	-0.321916	-0.028385	-1.53565	0.124626	0.228706
169	O94826	TOMM70	-0.323432	0.0205148	-1.53473	0.124851	0.228706
385	P19022	CDH2	-0.321179	-0.0334679	-1.53325	0.125216	0.228706
361	P15882	CHN1	-0.32331	0.00930468	-1.53286	0.125312	0.228706
457	P28066	PSMA5	-0.312416	-0.0744987	-1.53266	0.125361	0.228706
1588	Q9Y5M8	SRPRB	-0.321349	-0.0217022	-1.53233	0.125443	0.228706
1111	Q8N1B4	VPS52	-0.321658	-0.00843023	-1.53214	0.125491	0.228706
1139	Q8N9R8	SCAI	-0.319874	0.0489082	-1.53162	0.125617	0.228706
1584	Q9Y4W6	AFG3L2	-0.320888	-0.0282391	-1.53072	0.125839	0.228717
524	P38646	HSPA9	-0.320308	0.0440076	-1.53045	0.125908	0.228717
637	P53985	SLC16A1	-0.319189	-0.0390162	-1.52636	0.126923	0.2303
558	P45880	VDAC2	-0.318	-0.0449778	-1.52576	0.127073	0.23031
425	P23515	OMG	-0.312227	-0.0665421	-1.52327	0.127692	0.230928
791	Q01518	CAP1	-0.319396	-0.0249237	-1.52324	0.127702	0.230928
1219	Q96BQ5	CCDC127	-0.313839	-0.0559168	-1.51858	0.128869	0.232545
1506	Q9ULU8	CADPS	-0.313315	0.0723713	-1.51825	0.128953	0.232545
367	P17152	TMEM11	-0.318094	-0.0314353	-1.51794	0.12903	0.232545
794	Q02153	GUCY1B1	-0.319114	-0.000573286	-1.51683	0.129313	0.232729
1013	Q66LE6	PPP2R2D	-0.319487	0.02071	-1.51607	0.129503	0.232729
649	P55036	PSMD4	-0.319401	0.0205523	-1.51562	0.129618	0.232729
878	Q13875	MOBP	-0.318087	-0.00846273	-1.51514	0.12974	0.232729
1329	Q9GZZ9	UBA5	-0.319512	0.0134861	-1.51467	0.129858	0.232729
1537	Q9Y285	FARSA	-0.316136	-0.0193146	-1.50736	0.13172	0.235803
1176	Q8WXG6	MADD	-0.31539	-0.0203307	-1.50385	0.132621	0.237151
1162	Q8TEA8	DTD1	-0.3148	-0.0266664	-1.50145	0.133242	0.237996
105	O60313	OPA1	-0.309188	-0.0591464	-1.49994	0.133631	0.238289
1474	Q9UEY8	ADD3	-0.315307	-0.00163267	-1.49927	0.133805	0.238289
227	P04216	THY1	-0.312961	-0.042268	-1.49909	0.133852	0.238289
243	P05141	SLC25A5	-0.306792	-0.0648563	-1.49489	0.134945	0.239969
1395	Q9NQC3	RTN4	-0.314298	0.0240396	-1.49245	0.135582	0.240762
1561	Q9Y3A3	MOB4	-0.314706	0.014467	-1.49204	0.135691	0.240762
775	P84098	RPL19	-0.3021	-0.0836781	-1.49088	0.135996	0.240933
1569	Q9Y426	C2CD2	-0.312503	-0.0270396	-1.49052	0.136088	0.240933
372	P17600	SYN1	-0.31201	-0.0194402	-1.48769	0.136834	0.241986
1043	Q6Y1H2	HACD2	-0.311881	-0.0167236	-1.48687	0.137051	0.242102
1143	Q8NC96	NECAP1	-0.313202	0.0142478	-1.48487	0.13758	0.242771
443	P26373	RPL13	-0.299311	-0.0866182	-1.47978	0.138935	0.244892
410	P22059	OSBP	-0.310335	0.0334201	-1.47707	0.139658	0.245802
297	P09525	ANXA4	-0.309658	-0.0236655	-1.4767	0.139757	0.245802
613	P51553	IDH3G	-0.307621	0.0518494	-1.47491	0.140238	0.246377
223	P04083	ANXA1	-0.309699	-0.00529484	-1.47428	0.140408	0.246405
7	A8MVW0	FAM171A2	-0.307507	-0.0426983	-1.47335	0.14066	0.246507
88	O43639	NCK2	-0.310479	0.0185853	-1.47276	0.140818	0.246507
325	P11233	RALA	-0.306101	-0.0481033	-1.47205	0.141009	0.246507
282	P08243	ASNS	-0.293974	-0.105195	-1.47143	0.141176	0.246507
1434	Q9NZ01	TECR	-0.308507	-0.0237178	-1.47122	0.141234	0.246507
24	O00483	NDUFA4	-0.307978	-0.0284434	-1.46917	0.141787	0.247203
770	P82930	MRPS34	-0.305214	-0.0473082	-1.46693	0.142398	0.247711
482	P31146	CORO1A	-0.301824	0.0772553	-1.46666	0.142471	0.247711
1538	Q9Y287	ITM2B	-0.307494	-0.0164803	-1.46593	0.142669	0.247711
781	Q00325	SLC25A3	-0.306658	-0.0380051	-1.46583	0.142696	0.247711
731	P62873	GNB1	-0.307321	-0.0112127	-1.4644	0.143086	0.247952
641	P54577	YARS1	-0.304658	0.056882	-1.46419	0.143144	0.247952
1383	Q9HD33	MRPL47	-0.306295	-0.0337325	-1.46227	0.14367	0.248374
449	P27338	MAOB	-0.306636	-0.0108252	-1.46107	0.143999	0.248374
1206	Q93050	ATP6V0A1	-0.306264	-0.028142	-1.46094	0.144033	0.248374
696	P61604	HSPE1	-0.306241	-0.0271293	-1.46067	0.144108	0.248374
898	Q14344	GNA13	-0.307749	0.00479518	-1.4603	0.14421	0.248374
1555	Q9Y2V2	CARHSP1	-0.307498	0.0232775	-1.45991	0.144317	0.248374
405	P21796	VDAC1	-0.304691	-0.0416198	-1.45892	0.14459	0.248389
851	Q13303	KCNAB2	-0.29981	-0.0624924	-1.45829	0.144762	0.248389
224	P04156	PRNP	-0.295674	-0.0821583	-1.4578	0.144898	0.248389
1488	Q9UI40	SLC24A2	-0.300314	-0.0593878	-1.45717	0.145071	0.248389
931	Q15286	RAB35	-0.303364	-0.0464084	-1.45707	0.1451	0.248389
1223	Q96CW1	AP2M1	-0.306541	0.00290813	-1.45542	0.145555	0.248546
262	P07099	EPHX1	-0.288978	-0.113388	-1.45513	0.145634	0.248546
440	P25789	PSMA4	-0.302033	-0.050284	-1.45491	0.145697	0.248546
651	P55060	CSE1L	-0.306438	0.0204231	-1.45407	0.145928	0.248546
1217	Q96B97	SH3KBP1	-0.295639	-0.0776073	-1.45337	0.146123	0.248546
1073	Q86TV6	TTC7B	-0.304968	-0.00958509	-1.45291	0.146252	0.248546
750	P67936	TPM4	-0.297228	-0.0691355	-1.45277	0.146289	0.248546
624	P52306	RAP1GDS1	-0.298136	0.0810356	-1.45194	0.14652	0.248546
1334	Q9H0Q0	CYRIA	-0.302125	0.0550734	-1.45077	0.146846	0.248546
383	P18621	RPL17	-0.294439	-0.0798531	-1.4496	0.147173	0.248546
138	O75381	PEX14	-0.301795	-0.0463725	-1.44949	0.147202	0.248546
266	P07203	GPX1	-0.303851	-0.0166058	-1.44858	0.147457	0.248546
608	P50993	ATP1A2	-0.291498	-0.0945461	-1.44828	0.147542	0.248546
732	P62879	GNB2	-0.295959	0.0889423	-1.44813	0.147583	0.248546
1481	Q9UHG3	PCYOX1	-0.297261	-0.0644411	-1.448	0.147618	0.248546
274	P07814	EPRS1	-0.30357	-0.0245222	-1.44773	0.147694	0.248546
433	P24752	ACAT1	-0.303467	-0.0248274	-1.44726	0.147826	0.248546
599	P49840	GSK3A	-0.303021	-0.00660871	-1.44286	0.149063	0.250093
736	P62913	RPL11	-0.289814	-0.0973418	-1.44258	0.14914	0.250093
1339	Q9H1K1	ISCU	-0.302486	-0.0203365	-1.44232	0.149214	0.250093
915	Q15008	PSMD6	-0.303418	0.022592	-1.44031	0.149781	0.250695
307	P10412	H1-4	-0.297136	-0.0572286	-1.43928	0.150074	0.250695
918	Q15046	KARS1	-0.297701	0.0677143	-1.43886	0.150193	0.250695
308	P10515	DLAT	-0.301842	-0.0149904	-1.43884	0.150198	0.250695
26	O00499	BIN1	-0.30286	0.00366661	-1.43759	0.150553	0.250869
400	P21283	ATP6V1C1	-0.3017	-0.00974842	-1.43737	0.150615	0.250869
483	P31150	GDI1	-0.301163	-0.0209675	-1.43604	0.150992	0.251236
173	O94919	ENDOD1	-0.300876	-0.0212649	-1.43469	0.151378	0.251498
486	P31689	DNAJA1	-0.298546	-0.046845	-1.43439	0.151464	0.251498
821	Q08209	PPP3CA	-0.297153	-0.0515913	-1.43289	0.151891	0.251947
530	P40429	RPL13A	-0.289774	-0.0851994	-1.43139	0.152322	0.252401
120	O75077	ADAM23	-0.294338	-0.0607405	-1.4297	0.152806	0.252786
864	Q13526	PIN1	-0.299988	-0.0113156	-1.42948	0.15287	0.252786
1540	Q9Y296	TRAPPC4	-0.296816	-0.047886	-1.42717	0.153533	0.253622
1103	Q8IYB5	SMAP1	-0.298852	0.0410572	-1.42623	0.153805	0.253689
114	O60831	PRAF2	-0.29956	0.0326514	-1.42546	0.154025	0.253689
567	P46782	RPS5	-0.290147	-0.0761758	-1.42503	0.15415	0.253689
46	O14880	MGST3	-0.297632	-0.041295	-1.42484	0.154206	0.253689
877	Q13825	AUH	-0.297075	-0.0434127	-1.42397	0.154456	0.25384
1173	Q8WWC4	MAIP1	-0.294056	0.0703635	-1.42332	0.154646	0.253892
1045	Q6ZVL6	KIAA1549L	-0.291248	-0.0677381	-1.42216	0.154982	0.254089
826	Q08722	CD47	-0.297983	-0.0304151	-1.42181	0.155083	0.254089
711	P62263	RPS14	-0.286373	-0.0927621	-1.4212	0.155261	0.254121
208	P00558	PGK1	-0.298649	0.0306665	-1.42036	0.155504	0.254259
1486	Q9UI12	ATP6V1H	-0.296707	-0.0103195	-1.41367	0.15746	0.256921
1335	Q9H0R4	HDHD2	-0.296884	-0.00522287	-1.41326	0.157582	0.256921
183	O95197	RTN3	-0.29763	0.0235589	-1.41315	0.157613	0.256921
17	O00330	PDHX	-0.29571	-0.0355176	-1.41221	0.157891	0.256931
610	P51114	FXR1	-0.296395	-0.0064441	-1.41126	0.158169	0.256931
255	P06730	EIF4E	-0.29767	0.0135715	-1.41112	0.15821	0.256931
833	Q12860	CNTN1	-0.287314	-0.0760052	-1.41096	0.158259	0.256931
399	P21281	ATP6V1B2	-0.295937	-0.00897643	-1.40977	0.15861	0.25724
793	Q01814	ATP2B2	-0.293037	-0.0463852	-1.40744	0.159299	0.258096
21	O00429	DNM1L	-0.288716	0.0814013	-1.40637	0.159616	0.25822
467	P30041	PRDX6	-0.288019	-0.0672879	-1.40595	0.159742	0.25822
857	Q13424	SNTA1	-0.295485	0.0313724	-1.40555	0.159858	0.25822
189	O95433	AHSA1	-0.289106	0.0763454	-1.40412	0.160284	0.258648
825	Q08554	DSC1	-0.282612	-0.0926928	-1.40247	0.160775	0.259034
582	P48729	CSNK1A1	-0.285788	-0.0743366	-1.40187	0.160955	0.259034
960	Q16698	DECR1	-0.289281	-0.0576457	-1.4017	0.161008	0.259034
1328	Q9GZY8	MFF	-0.285056	-0.0773183	-1.40108	0.161193	0.259071
132	O75323	NIPSNAP2	-0.294883	0.0246091	-1.40045	0.161382	0.259115
861	Q13505	MTX1	-0.290144	-0.0512252	-1.39868	0.16191	0.25955
1351	Q9H3Q1	CDC42EP4	-0.294966	0.00975156	-1.39846	0.161976	0.25955
720	P62701	RPS4X	-0.28474	-0.0750506	-1.39741	0.162293	0.259798
382	P18507	GABRG2	-0.292389	-0.0360584	-1.39652	0.162559	0.259965
113	O60762	DPM1	-0.283744	-0.0778744	-1.39514	0.162977	0.260245
1087	Q86YQ8	CPNE8	-0.288498	-0.0548849	-1.39481	0.163075	0.260245
116	O60884	DNAJA2	-0.286107	-0.0650784	-1.39433	0.163221	0.260245
338	P13489	RNH1	-0.285661	0.0832895	-1.39305	0.163608	0.260602
708	P62244	RPS15A	-0.28231	-0.0826359	-1.39232	0.163829	0.260696
299	P09622	DLD	-0.291828	-0.0149906	-1.39111	0.164195	0.26102
174	O94925	GLS	-0.292394	0.0265455	-1.38925	0.164759	0.261544
1476	Q9UGM6	WARS2	-0.288506	-0.0495586	-1.38895	0.164851	0.261544
1558	Q9Y305	ACOT9	-0.291153	-0.0147885	-1.38787	0.16518	0.261807
1461	Q9P2R7	SUCLA2	-0.280109	0.107641	-1.38605	0.165734	0.26196
653	P55084	HADHB	-0.290665	-0.0174439	-1.38579	0.165812	0.26196
43	O14775	GNB5	-0.290441	-0.0210206	-1.38492	0.166079	0.26196
1047	Q76NI1	KNDC1	-0.288556	-0.0453984	-1.38491	0.166082	0.26196
441	P26196	DDX6	-0.289992	-0.0354091	-1.38487	0.166093	0.26196
1495	Q9UJU6	DBNL	-0.286739	0.0651824	-1.38397	0.166371	0.262057
679	P60981	DSTN	-0.28481	0.0767784	-1.38361	0.166481	0.262057
1186	Q92561	PHYHIP	-0.289774	0.0413583	-1.38307	0.166646	0.262059
1478	Q9UH65	SWAP70	-0.285995	0.0677177	-1.38228	0.166888	0.262182
1430	Q9NXU5	ARL15	-0.289475	0.0391024	-1.38043	0.167458	0.262762
35	O14548	COX7A2L	-0.289063	-0.0310692	-1.37935	0.167789	0.262762
1585	Q9Y512	SAMM50	-0.282882	-0.0654932	-1.37904	0.167886	0.262762
187	O95299	NDUFA10	-0.289541	-0.00765753	-1.37895	0.167912	0.262762
1031	Q6P9B6	MEAK7	-0.285021	-0.0536005	-1.37659	0.168643	0.263612
177	O95057	DIRAS1	-0.279856	-0.0779913	-1.37613	0.168784	0.263612
687	P61201	COPS2	-0.286561	0.0535219	-1.37502	0.169128	0.263893
1054	Q7L523	RRAGA	-0.289843	0.014318	-1.37414	0.169401	0.264061
437	P25686	DNAJB2	-0.281327	-0.0636441	-1.36958	0.170821	0.265819
1401	Q9NR46	SH3GLB2	-0.278527	0.0970294	-1.36945	0.17086	0.265819
996	Q5T2T1	MPP7	-0.283921	-0.0496627	-1.36699	0.171631	0.266759
1390	Q9NPD7	NRN1	-0.281593	-0.0571024	-1.36385	0.172617	0.267792
840	Q12983	BNIP3	-0.275497	-0.0883949	-1.36352	0.172719	0.267792
447	P27105	STOM	-0.285676	-0.0288983	-1.36285	0.17293	0.267792
1286	Q99873	PRMT1	-0.282677	0.0629413	-1.36275	0.172963	0.267792
1551	Q9Y2L5	TRAPPC8	-0.285331	-0.0212638	-1.36056	0.173654	0.268602
86	O43615	TIMM44	-0.280456	0.0700675	-1.35726	0.174699	0.269959
1082	Q86X55	CARM1	-0.276037	0.0955333	-1.35599	0.175104	0.270324
729	P62851	RPS25	-0.273322	-0.0902559	-1.35431	0.17564	0.270891
1296	Q9BR76	CORO1B	-0.282387	0.0506017	-1.35316	0.176005	0.271194
1275	Q99584	S100A13	-0.283496	-0.00917429	-1.35055	0.176842	0.272066
165	O94772	LY6H	-0.277161	-0.0645044	-1.35016	0.176968	0.272066
121	O75083	WDR1	-0.280314	0.0600149	-1.34931	0.177241	0.272066
1039	Q6UXD5	SEZ6L2	-0.283016	-0.0168174	-1.34927	0.177253	0.272066
690	P61247	RPS3A	-0.276127	-0.0680222	-1.34859	0.177471	0.272066
270	P07355	ANXA2	-0.274745	-0.0748561	-1.34818	0.177602	0.272066
601	P50148	GNAQ	-0.283478	-0.00112967	-1.34769	0.177759	0.272066
1563	Q9Y3D6	FIS1	-0.281583	-0.0362681	-1.34502	0.17862	0.272868
694	P61421	ATP6V0D1	-0.282069	-0.021349	-1.34501	0.178623	0.272868
426	P23528	CFL1	-0.276894	0.0744697	-1.34336	0.179158	0.273425
629	P53396	ACLY	-0.281424	0.0362989	-1.34067	0.180029	0.273879
677	P60880	SNAP25	-0.281063	-0.0267811	-1.34055	0.180069	0.273879
1369	Q9H9A6	LRRC40	-0.278207	0.0619487	-1.3405	0.180085	0.273879
500	P35232	PHB	-0.280942	-0.0293134	-1.34034	0.180138	0.273879
646	P54920	NAPA	-0.28109	-0.0104871	-1.33929	0.180478	0.274135
656	P55209	NAP1L1	-0.280303	0.0396559	-1.33695	0.18124	0.275032
1462	Q9P2U7	SLC17A7	-0.279837	-0.0342014	-1.33608	0.181526	0.275206
574	P47897	QARS1	-0.280209	0.0330067	-1.33352	0.182362	0.275534
321	P11177	PDHB	-0.279546	-0.0211356	-1.33297	0.182544	0.275534
1074	Q86TX2	ACOT1	-0.27116	0.0965775	-1.33287	0.182576	0.275534
692	P61313	RPL15	-0.268367	-0.0932611	-1.33225	0.182779	0.275534
1316	Q9BY44	EIF2A	-0.27929	-0.0249082	-1.33197	0.182873	0.275534
1147	Q8NF37	LPCAT1	-0.277828	0.0511715	-1.33166	0.182974	0.275534
804	Q02878	RPL6	-0.270431	-0.0788639	-1.33054	0.183343	0.275534
984	Q53H12	AGK	-0.27186	-0.0705931	-1.33014	0.183475	0.275534
72	O43175	PHGDH	-0.2756	0.064502	-1.32973	0.18361	0.275534
619	P51674	GPM6A	-0.262315	-0.122414	-1.32954	0.183672	0.275534
76	O43242	PSMD3	-0.280172	0.0199618	-1.32933	0.183742	0.275534
1028	Q6P1N0	CC2D1A	-0.27858	-0.0298136	-1.32914	0.183804	0.275534
912	Q14982	OPCML	-0.270401	-0.0752787	-1.32724	0.18443	0.27602
1403	Q9NRG7	SDR39U1	-0.274693	0.0667711	-1.32697	0.18452	0.27602
1433	Q9NYI0	PSD3	-0.278863	-0.0029878	-1.3266	0.184644	0.27602
1232	Q96FW1	OTUB1	-0.273619	0.07133	-1.32511	0.185135	0.276497
1132	Q8N766	EMC1	-0.273723	-0.0546173	-1.3231	0.185805	0.277239
276	P07919	UQCRH	-0.278365	0.0222165	-1.32129	0.186406	0.277835
961	Q16718	NDUFA5	-0.277707	-0.00245516	-1.32086	0.186552	0.277835
1135	Q8N9F7	GDPD1	-0.278053	0.0174035	-1.31871	0.187267	0.278643
699	P61978	HNRNPK	-0.27769	0.0225105	-1.31816	0.187453	0.278661
423	P23396	RPS3	-0.269602	-0.0686774	-1.31732	0.187732	0.278742
697	P61626	LYZ	-0.270374	-0.0643637	-1.31696	0.187855	0.278742
598	P49821	NDUFV1	-0.276161	-0.0104103	-1.3158	0.188244	0.278906
816	Q07020	RPL18	-0.26494	-0.0936567	-1.31557	0.188321	0.278906
131	O75306	NDUFS2	-0.275734	-0.022084	-1.31484	0.188567	0.278906
1181	Q92522	H1-10	-0.267924	-0.0746836	-1.31455	0.188662	0.278906
1594	Q9Y6C9	MTCH2	-0.27519	-0.0227057	-1.31227	0.189431	0.279785
1211	Q969Z3	MTARC2	-0.275015	-0.0187743	-1.31127	0.189768	0.280025
1560	Q9Y376	CAB39	-0.272835	-0.046365	-1.31039	0.190064	0.280071
709	P62249	RPS16	-0.266703	-0.0764753	-1.31015	0.190148	0.280071
293	P09471	GNAO1	-0.274102	-0.0338849	-1.30862	0.190666	0.280577
564	P46777	RPL5	-0.267047	-0.0695922	-1.30567	0.191665	0.281788
225	P04179	SOD2	-0.272095	-0.0440167	-1.30471	0.191995	0.282015
1200	Q92930	RAB8B	-0.273822	-0.00627727	-1.30374	0.192325	0.282187
452	P27544	CERS1	-0.273355	-0.0164606	-1.30318	0.192516	0.282187
439	P25786	PSMA1	-0.272066	-0.0417694	-1.30282	0.19264	0.282187
289	P09001	MRPL3	-0.267098	-0.0657075	-1.3023	0.192817	0.282188
461	P28482	MAPK1	-0.273583	-0.00212666	-1.3011	0.193227	0.282531
975	Q3ZCQ8	TIMM50	-0.273931	0.0208055	-1.29991	0.193632	0.282866
681	P61026	RAB10	-0.268214	-0.0573333	-1.2993	0.193844	0.282917
1295	Q9BQI5	SGIP1	-0.267978	-0.0563436	-1.29712	0.194591	0.28375
944	Q15773	MLF2	-0.267322	-0.0588625	-1.29655	0.194787	0.283777
154	O75935	DCTN3	-0.27146	0.0409481	-1.29544	0.19517	0.283855
1091	Q8IUS5	EPHX4	-0.270045	-0.044652	-1.29537	0.195195	0.283855
259	P06753	TPM3	-0.265482	-0.0625445	-1.29137	0.196577	0.285607
10	O00170	AIP	-0.27009	-0.0344162	-1.28959	0.197195	0.286059
560	P45985	MAP2K4	-0.269013	0.0506053	-1.28908	0.197373	0.286059
623	P51991	HNRNPA3	-0.271663	0.00535255	-1.28893	0.197423	0.286059
847	Q13155	AIMP2	-0.266521	0.0602164	-1.28304	0.199479	0.288641
141	O75396	SEC22B	-0.27051	0.0164497	-1.2828	0.199565	0.288641
1424	Q9NVJ2	ARL8B	-0.268547	-0.00794391	-1.27904	0.200886	0.290143
735	P62906	RPL10A	-0.262581	-0.0641672	-1.27881	0.200966	0.290143
93	O43681	GET3	-0.268009	0.0386318	-1.27784	0.201308	0.290165
1123	Q8N573	OXR1	-0.268846	0.0277877	-1.27774	0.201343	0.290165
883	Q14141	SEPTIN6	-0.269021	0.00374843	-1.27693	0.201628	0.290315
290	P09104	ENO2	-0.265306	-0.0451673	-1.27311	0.202982	0.292003
1170	Q8WVJ2	NUDCD2	-0.265574	0.0496557	-1.27205	0.203356	0.292278
1525	Q9UQ80	PA2G4	-0.267627	0.0145966	-1.26885	0.204496	0.293654
544	P42658	DPP6	-0.255758	-0.0877844	-1.26535	0.205746	0.294512
415	P22392	NME2	-0.26534	-0.0192594	-1.26516	0.205816	0.294512
1373	Q9HAD4	WDR41	-0.265291	-0.0199523	-1.26495	0.20589	0.294512
1499	Q9UKU0	ACSL6	-0.265803	0.0322974	-1.2647	0.205981	0.294512
149	O75781	PALM	-0.265521	-0.00790372	-1.26461	0.206011	0.294512
1239	Q96I99	SUCLG2	-0.255289	0.107418	-1.26306	0.206568	0.295045
408	P21964	COMT	-0.256904	0.0957621	-1.26218	0.206886	0.295236
188	O95372	LYPLA2	-0.262479	0.0545163	-1.26006	0.20765	0.295787
420	P23246	SFPQ	-0.264525	-0.00730098	-1.25973	0.20777	0.295787
974	Q3SXM5	HSDL1	-0.264635	-0.00452595	-1.25957	0.207825	0.295787
659	P55809	OXCT1	-0.252809	0.117949	-1.2588	0.208104	0.295921
1208	Q969G6	RFK	-0.263754	-0.0274805	-1.25807	0.208368	0.296033
590	P49441	INPP1	-0.262744	0.0477558	-1.25743	0.2086	0.296095
1448	Q9P0K9	FRRS1L	-0.259859	-0.0543221	-1.25578	0.209197	0.296095
450	P27348	YWHAQ	-0.260361	0.063663	-1.25565	0.209246	0.296095
518	P36957	DLST	-0.262739	-0.0363401	-1.25505	0.209462	0.296095
323	P11216	PYGB	-0.260457	0.0619606	-1.25498	0.209487	0.296095
850	Q13232	NME3	-0.264611	0.0078168	-1.25489	0.209519	0.296095
231	P04632	CAPNS1	-0.260912	-0.0427462	-1.25014	0.211252	0.298282
285	P08574	CYC1	-0.261971	-0.0153341	-1.24881	0.211737	0.298526
1218	Q96BM9	ARL8A	-0.262317	-0.00496236	-1.24864	0.211797	0.298526
779	Q00059	TFAM	-0.256303	-0.0621216	-1.24631	0.212653	0.29947
1532	Q9Y230	RUVBL2	-0.257506	-0.0556129	-1.2457	0.212876	0.29952
657	P55290	CDH13	-0.252575	-0.078799	-1.24263	0.214006	0.300846
287	P08708	RPS17	-0.250708	-0.0869774	-1.23976	0.215066	0.302072
395	P20674	COX5A	-0.259476	-0.0275078	-1.23767	0.215841	0.302894
737	P62917	RPL8	-0.248449	-0.0960946	-1.23566	0.216586	0.303675
365	P16615	ATP2A2	-0.256085	0.057329	-1.23102	0.218316	0.305792
999	Q5T5C0	STXBP5	-0.252377	0.0830231	-1.23054	0.218496	0.305792
1522	Q9UPY8	MAPRE3	-0.257547	0.0430274	-1.23008	0.218668	0.305792
1450	Q9P0M9	MRPL27	-0.249418	-0.0796267	-1.22777	0.219537	0.306579
1163	Q8TF44	C2CD4C	-0.245186	-0.104579	-1.22668	0.219944	0.306579
1168	Q8WUY1	THEM6	-0.25781	-0.00347325	-1.22665	0.219958	0.306579
347	P13987	CD59	-0.257185	-0.024937	-1.22654	0.219996	0.306579
1224	Q96CX2	KCTD12	-0.257049	-0.0263901	-1.22599	0.220206	0.306606
122	O75110	ATP9A	-0.255274	-0.041763	-1.2224	0.221558	0.308148
1128	Q8N608	DPP10	-0.25204	-0.0584476	-1.22203	0.221698	0.308148
739	P62979	RPS27A	-0.25577	-0.0338881	-1.2211	0.222052	0.308373
123	O75116	ROCK2	-0.25425	0.0523223	-1.21928	0.222738	0.309059
1427	Q9NX14	NDUFB11	-0.255196	-0.0155469	-1.21653	0.223785	0.310243
680	P61020	RAB5B	-0.251191	-0.0558271	-1.21536	0.224231	0.310593
1455	Q9P1Y5	CAMSAP3	-0.252891	-0.0459268	-1.21421	0.224669	0.31077
1439	Q9NZN3	EHD3	-0.252838	0.0549214	-1.21401	0.224746	0.31077
1593	Q9Y697	NFS1	-0.25401	0.0429994	-1.21318	0.225065	0.310942
628	P53365	ARFIP2	-0.253799	0.0402875	-1.21084	0.225959	0.311647
1475	Q9UGC6	RGS17	-0.253885	-0.0209835	-1.2106	0.226049	0.311647
515	P36543	ATP6V1E1	-0.253768	-0.0260651	-1.21032	0.226158	0.311647
248	P05387	RPLP2	-0.246574	-0.0720448	-1.20764	0.227188	0.312528
812	Q05329	GAD2	-0.249615	0.0689282	-1.20725	0.227339	0.312528
1071	Q86SX6	GLRX5	-0.254093	0.0260693	-1.20714	0.227382	0.312528
284	P08559	PDHA1	-0.252699	-0.0278949	-1.2054	0.228053	0.313182
354	P14867	GABRA1	-0.248425	-0.0572819	-1.20338	0.228831	0.313982
226	P04181	OAT	-0.245379	0.0912175	-1.20228	0.229258	0.314299
1454	Q9P1U1	ACTR3B	-0.251768	-0.0320931	-1.20158	0.229527	0.314399
314	P10809	HSPD1	-0.247831	-0.0571128	-1.20034	0.230008	0.314789
693	P61353	RPL27	-0.24483	-0.0694796	-1.19695	0.231326	0.316324
1167	Q8WUM4	PDCD6IP	-0.24909	0.0523107	-1.19453	0.232273	0.317347
934	Q15349	RPS6KA2	-0.248549	0.053513	-1.19262	0.23302	0.318098
1231	Q96FC7	PHYHIPL	-0.24564	0.0744989	-1.19175	0.233361	0.318193
1360	Q9H4M9	EHD1	-0.247717	0.057549	-1.19093	0.233683	0.318193
494	P32969	RPL9	-0.240401	-0.0899058	-1.19092	0.233685	0.318193
873	Q13636	RAB31	-0.249661	-0.0134529	-1.18996	0.234062	0.318351
1397	Q9NQP4	PFDN4	-0.249811	-0.00714006	-1.18962	0.234198	0.318351
485	P31323	PRKAR2B	-0.245343	0.0704866	-1.18761	0.234988	0.318887
84	O43581	SYT7	-0.245559	-0.0553001	-1.18761	0.23499	0.318887
1290	Q9BPW8	NIPSNAP1	-0.248922	0.0364294	-1.18589	0.235667	0.319535
30	O00767	SCD	-0.247916	-0.0329669	-1.1834	0.236654	0.320431
1426	Q9NX07	TRNAU1AP	-0.249051	0.00104753	-1.18317	0.236744	0.320431
704	P62166	NCS1	-0.248035	-0.0209202	-1.18271	0.236927	0.320431
445	P26641	EEF1G	-0.242521	0.0811849	-1.1812	0.237526	0.320661
202	O96011	PEX11B	-0.24778	-0.0127734	-1.1809	0.237644	0.320661
1055	Q7L5D6	GET4	-0.245952	-0.0457781	-1.18077	0.237697	0.320661
701	P62070	RRAS2	-0.247461	-0.0192787	-1.17991	0.238037	0.32085
575	P47985	UQCRFS1	-0.246381	-0.0387775	-1.17807	0.238769	0.321566
1270	Q99259	GAD1	-0.244685	0.0581722	-1.17672	0.23931	0.322024
363	P16152	CBR1	-0.243601	0.0642697	-1.17519	0.239919	0.322573
36	O14561	NDUFAB1	-0.246781	-0.00313621	-1.17404	0.240381	0.322691
57	O14994	SYN3	-0.241834	-0.0597472	-1.17375	0.240498	0.322691
600	P49841	GSK3B	-0.246146	-0.0165042	-1.17347	0.24061	0.322691
1386	Q9NP72	RAB18	-0.242875	-0.0513322	-1.17092	0.241634	0.323794
148	O75746	SLC25A12	-0.243537	-0.0471099	-1.17032	0.241874	0.323845
802	Q02750	MAP2K1	-0.23918	0.0864014	-1.16854	0.242593	0.324536
205	P00403	MT-CO2	-0.244406	-0.0249883	-1.1656	0.243776	0.325844
869	Q13572	ITPK1	-0.239719	0.0769246	-1.16465	0.244162	0.325844
232	P04792	HSPB1	-0.244596	0.0337272	-1.16429	0.244309	0.325844
964	Q16799	RTN1	-0.245075	0.0253673	-1.16411	0.244383	0.325844
1175	Q8WXF7	ATL1	-0.244295	0.0348056	-1.16322	0.244743	0.326052
966	Q16851	UGP2	-0.230621	-0.113855	-1.16168	0.245369	0.326514
957	Q16643	DBN1	-0.24146	0.0584367	-1.16136	0.245496	0.326514
1536	Q9Y281	CFL2	-0.244046	0.0293627	-1.16031	0.245924	0.326813
488	P31943	HNRNPH1	-0.243098	-0.010984	-1.15834	0.246727	0.327608
771	P83731	RPL24	-0.233637	-0.090262	-1.15767	0.246999	0.327697
1125	Q8N5N7	MRPL50	-0.237859	-0.0624908	-1.15696	0.247291	0.327814
1366	Q9H8H3	METTL7A	-0.241618	0.0433592	-1.15416	0.248437	0.329061
233	P04843	RPN1	-0.241894	-0.0223734	-1.15348	0.248716	0.329158
130	O75251	NDUFS7	-0.241595	-0.0191157	-1.15194	0.249348	0.329723
310	P10599	TXN	-0.234055	-0.0783812	-1.1512	0.24965	0.32985
1381	Q9HCM2	PLXNA4	-0.240975	0.0418845	-1.1504	0.24998	0.330015
414	P22314	UBA1	-0.230895	0.114965	-1.1476	0.251136	0.331158
1336	Q9H115	NAPB	-0.241915	0.0172561	-1.1473	0.251259	0.331158
345	P13798	APEH	-0.23522	-0.0646691	-1.14599	0.251803	0.331393
416	P22626	HNRNPA2B1	-0.241124	7.11347e-05	-1.14587	0.251851	0.331393
546	P42765	ACAA2	-0.24129	0.00471587	-1.14496	0.252228	0.331617
860	Q13501	SQSTM1	-0.238809	0.0504965	-1.14429	0.252507	0.331712
497	P34932	HSPA4	-0.238574	-0.0414598	-1.14223	0.253362	0.332301
250	P05496	ATP5MC1	-0.239612	-0.0151452	-1.14221	0.253369	0.332301
64	O15145	ARPC3	-0.239434	-0.00224298	-1.13873	0.254816	0.333675
747	P63220	RPS21	-0.233077	-0.0683605	-1.1386	0.25487	0.333675
69	O15498	YKT6	-0.239597	0.0237941	-1.13767	0.255259	0.333675
612	P51452	DUSP3	-0.229392	0.110946	-1.13736	0.255391	0.333675
1189	Q92598	HSPH1	-0.238848	0.0345527	-1.1372	0.255457	0.333675
162	O76054	SEC14L2	-0.23086	0.0991044	-1.1365	0.255749	0.333785
29	O00764	PDXK	-0.235158	0.0620295	-1.13312	0.257165	0.335189
754	P68400	CSNK2A1	-0.238891	0.0170762	-1.13294	0.257243	0.335189
1387	Q9NP79	VTA1	-0.227896	0.1144	-1.1323	0.257509	0.335263
1552	Q9Y2Q0	ATP8A1	-0.234396	0.0638969	-1.13057	0.25824	0.335942
789	Q01105	SET	-0.22992	-0.0770596	-1.12989	0.258526	0.336041
156	O75947	ATP5PD	-0.236881	-0.0173455	-1.12936	0.258747	0.336057
1344	Q9H2H8	PPIL3	-0.237639	0.0242732	-1.1285	0.25911	0.336256
1199	Q92905	COPS5	-0.233609	0.059449	-1.12417	0.260943	0.338237
311	P10606	COX5B	-0.235862	-0.0112482	-1.1239	0.261058	0.338237
256	P06733	ENO1	-0.235688	-0.00808638	-1.12257	0.261623	0.338429
923	Q15119	PDK2	-0.236115	-0.000825388	-1.12241	0.261691	0.338429
702	P62081	RPS7	-0.226719	-0.0883253	-1.12206	0.26184	0.338429
1096	Q8IWB7	WDFY1	-0.228107	0.094051	-1.11955	0.262908	0.339537
422	P23297	S100A1	-0.235512	0.00316105	-1.11809	0.26353	0.340067
32	O14495	PLPP3	-0.233511	-0.0385722	-1.11644	0.264234	0.340578
379	P18124	RPL7	-0.224736	-0.0939966	-1.11617	0.264351	0.340578
80	O43426	SYNJ1	-0.234657	0.0259782	-1.11478	0.264947	0.3408
552	P43304	GPD2	-0.233609	-0.0306658	-1.11468	0.264988	0.3408
756	P78324	SIRPA	-0.222677	-0.104775	-1.11423	0.265184	0.3408
1271	Q99426	TBCB	-0.22806	0.0857666	-1.11378	0.265374	0.3408
356	P14927	UQCRB	-0.232886	-0.0315149	-1.11135	0.266421	0.341871
514	P36542	ATP5F1C	-0.232554	-0.0312246	-1.10972	0.267121	0.342495
306	P10114	RAP2A	-0.225645	-0.0774161	-1.10914	0.267371	0.342543
1109	Q8N126	CADM3	-0.22388	-0.0875768	-1.1075	0.268079	0.343176
411	P22061	PCMT1	-0.231448	-0.0146458	-1.10325	0.269919	0.345256
1320	Q9C040	TRIM2	-0.231537	0.0344334	-1.10235	0.270311	0.345481
349	P14406	COX7A2	-0.230574	-0.0238258	-1.09958	0.271519	0.346748
576	P48047	ATP5PO	-0.22938	-0.0389767	-1.09687	0.272698	0.347915
921	Q15056	EIF4H	-0.228609	0.0515784	-1.09595	0.273103	0.347915
337	P13073	COX4I1	-0.229637	-0.0237425	-1.0951	0.273474	0.347915
1493	Q9UJC5	SH3BGRL2	-0.229744	-0.0136365	-1.09506	0.273494	0.347915
1444	Q9P035	HACD3	-0.229583	-0.0187703	-1.09465	0.273671	0.347915
431	P24539	ATP5PB	-0.229428	-0.0288406	-1.09451	0.273734	0.347915
268	P07305	H1-0	-0.22487	-0.0616444	-1.09305	0.274374	0.348453
698	P61764	STXBP1	-0.225668	0.0661134	-1.08975	0.275823	0.349847
5	A6ZKI3	RTL8C	-0.223656	-0.0636736	-1.08884	0.276225	0.349847
593	P49589	CARS1	-0.227922	0.0434636	-1.08878	0.276253	0.349847
744	P63104	YWHAZ	-0.226581	0.0561534	-1.08857	0.276344	0.349847
136	O75368	SH3BGRL	-0.228247	-0.0096266	-1.08741	0.276859	0.350002
858	Q13449	LSAMP	-0.222484	-0.0689524	-1.08731	0.276903	0.350002
1492	Q9UJ70	NAGK	-0.220288	0.0986486	-1.08416	0.278297	0.351486
438	P25705	ATP5F1A	-0.226725	-0.0228851	-1.08117	0.279623	0.352884
1299	Q9BRT3	MIEN1	-0.225971	0.0376094	-1.07701	0.281478	0.354784
1343	Q9H2G2	SLK	-0.226035	-0.0085543	-1.07669	0.281622	0.354784
1428	Q9NX63	CHCHD3	-0.221611	-0.0605815	-1.07631	0.281792	0.354784
1294	Q9BQG1	SYT3	-0.224987	-0.0182081	-1.07272	0.283399	0.356527
621	P51809	VAMP7	-0.221344	0.0671067	-1.06945	0.284867	0.35763
246	P05204	HMGN2	-0.214685	-0.0981578	-1.0692	0.28498	0.35763
766	P80404	ABAT	-0.220855	0.0694486	-1.06845	0.285319	0.35763
634	P53677	AP3M2	-0.221208	0.0664072	-1.06839	0.285347	0.35763
245	P05198	EIF2S1	-0.224403	-0.00554111	-1.06829	0.28539	0.35763
1423	Q9NVI7	ATAD3A	-0.221245	-0.0494176	-1.06501	0.286871	0.359205
389	P19404	NDUFV2	-0.223024	-0.0166844	-1.06325	0.287671	0.359683
59	O15066	KIF3B	-0.216613	-0.0740921	-1.06238	0.288067	0.359683
1302	Q9BT78	COPS4	-0.22069	0.0598473	-1.06221	0.288141	0.359683
1539	Q9Y291	MRPS33	-0.221488	-0.0442527	-1.06219	0.28815	0.359683
1196	Q92752	TNR	-0.217126	-0.0657717	-1.0587	0.28974	0.361387
458	P28072	PSMB6	-0.217974	-0.059552	-1.05778	0.290156	0.361624
391	P20020	ATP2B1	-0.220961	0.0409244	-1.05445	0.29168	0.363072
444	P26640	VARS1	-0.214539	0.0960973	-1.05425	0.29177	0.363072
1303	Q9BTV5	FSD1	-0.218776	0.05388	-1.04994	0.293748	0.36514
430	P23786	CPT2	-0.213557	0.0964354	-1.04963	0.293888	0.36514
910	Q14894	CRYM	-0.220496	0.0108723	-1.04536	0.29586	0.366906
561	P46109	CRKL	-0.215347	0.0751485	-1.04517	0.295945	0.366906
820	Q07960	ARHGAP1	-0.219885	-0.000281307	-1.04506	0.295995	0.366906
502	P35268	RPL22	-0.209152	-0.0984878	-1.04187	0.297472	0.368452
199	O95970	LGI1	-0.217763	-0.0254153	-1.03856	0.29901	0.370071
463	P29401	TKT	-0.215574	0.0572107	-1.03622	0.3001	0.371134
1562	Q9Y3C8	UFC1	-0.213442	0.0709581	-1.03347	0.301387	0.372397
1264	Q96QK1	VPS35	-0.211132	0.0889	-1.03304	0.301586	0.372397
1392	Q9NQ48	LZTFL1	-0.211981	0.0737762	-1.02802	0.303943	0.375018
1194	Q92743	HTRA1	-0.215895	0.030801	-1.02682	0.304506	0.375425
1228	Q96EY1	DNAJA3	-0.214069	-0.0433485	-1.02606	0.304865	0.375578
784	Q00610	CLTC	-0.213883	0.0501862	-1.02471	0.305503	0.376076
1498	Q9UKF7	PITPNC1	-0.211691	0.0617809	-1.01991	0.307771	0.378386
647	P55010	EIF5	-0.2125	0.0537214	-1.01974	0.307852	0.378386
230	P04406	GAPDH	-0.213209	-0.0236687	-1.01676	0.309272	0.37984
1508	Q9UMS0	NFU1	-0.20506	0.109954	-1.01611	0.30958	0.379929
700	P61981	YWHAG	-0.213127	0.0325961	-1.01415	0.310511	0.380779
630	P53597	SUCLG1	-0.205661	0.0930353	-1.00877	0.313087	0.383576
1441	Q9NZR1	TMOD2	-0.21143	-0.0170281	-1.008	0.313456	0.383576
595	P49748	ACADVL	-0.211659	-0.00691862	-1.00789	0.313509	0.383576
1333	Q9H0E2	TOLLIP	-0.209527	0.0574337	-1.00726	0.313809	0.383651
398	P21266	GSTM3	-0.209292	0.0576144	-1.00623	0.314307	0.383966
52	O14964	HGS	-0.203913	0.0923441	-0.999783	0.317417	0.387471
464	P29692	EEF1D	-0.205281	0.0794639	-0.998809	0.317889	0.387727
635	P53680	AP2S1	-0.209513	-0.0113287	-0.998353	0.31811	0.387727
569	P46976	GYG1	-0.204912	-0.0634105	-0.997395	0.318574	0.387803
312	P10636	MAPT	-0.210104	0.021919	-0.997227	0.318656	0.387803
809	Q04917	YWHAH	-0.205518	0.068305	-0.993634	0.320403	0.389633
783	Q00577	PURA	-0.209065	0.00829251	-0.991384	0.3215	0.390671
1443	Q9P032	NDUFAF4	-0.207809	0.0302665	-0.988237	0.323038	0.392243
99	O43837	IDH3B	-0.206847	0.0375907	-0.985855	0.324206	0.393363
300	P09669	COX6C	-0.207364	0.001472	-0.98499	0.324631	0.393487
186	O95298	NDUFC2	-0.206585	-0.0114697	-0.98442	0.324911	0.393487
956	Q16623	STX1A	-0.206516	-0.0119913	-0.984149	0.325044	0.393487
605	P50914	RPL14	-0.19847	-0.0882334	-0.982193	0.326006	0.394354
1140	Q8NBS9	TXNDC5	-0.201729	0.0781253	-0.980757	0.326714	0.394913
1056	Q7L5N1	COPS6	-0.202015	0.0729391	-0.979226	0.32747	0.395528
1310	Q9BWQ8	FAIM2	-0.205079	-0.0212521	-0.977891	0.32813	0.396027
716	P62316	SNRPD2	-0.192802	0.141868	-0.974391	0.329864	0.397821
710	P62258	YWHAE	-0.202689	0.0515251	-0.971666	0.331218	0.399154
748	P63244	RACK1	-0.202934	-0.0391622	-0.970482	0.331808	0.399564
1187	Q92572	AP3S1	-0.200658	0.0590014	-0.965386	0.334353	0.402243
260	P06756	ITGAV	-0.20352	0.0156008	-0.965026	0.334533	0.402243
387	P19338	NCL	-0.202326	-0.0115984	-0.964139	0.334977	0.402475
1044	Q6YP21	KYAT3	-0.201312	0.042338	-0.961227	0.33644	0.403664
237	P05026	ATP1B1	-0.195988	-0.0737808	-0.961016	0.336546	0.403664
1105	Q8IZR5	CMTM4	-0.200858	-0.0394428	-0.960664	0.336722	0.403664
1419	Q9NVA1	UQCC1	-0.201247	-0.0282496	-0.960005	0.337054	0.40376
460	P28472	GABRB3	-0.200711	-0.0378599	-0.959343	0.337388	0.403858
1130	Q8N6H7	ARFGAP2	-0.201291	-0.00582753	-0.958317	0.337904	0.404175
1559	Q9Y320	TMX2	-0.199671	0.0434545	-0.953824	0.340174	0.406586
1282	Q99784	OLFM1	-0.189392	-0.108542	-0.950294	0.341964	0.408422
922	Q15070	OXA1L	-0.1956	-0.0599394	-0.949493	0.342372	0.408604
1590	Q9Y5X3	SNX5	-0.194919	0.0777676	-0.947454	0.343409	0.409538
320	P11169	SLC2A3	-0.192517	-0.0776496	-0.946445	0.343923	0.409796
281	P08238	HSP90AB1	-0.194463	0.079197	-0.946025	0.344137	0.409796
479	P30520	ADSS2	-0.195459	0.0666315	-0.944142	0.345098	0.410636
1084	Q86Y39	NDUFA11	-0.197023	-0.0171943	-0.939324	0.347566	0.413266
92	O43678	NDUFA2	-0.197528	0.00495036	-0.937259	0.348627	0.41422
550	P43034	PAFAH1B1	-0.192842	0.0704343	-0.933447	0.350591	0.416245
835	Q12931	TRAP1	-0.188179	0.11036	-0.932684	0.350985	0.416405
959	Q16658	FSCN1	-0.193268	0.0615536	-0.931038	0.351835	0.417106
424	P23471	PTPRZ1	-0.187452	-0.0913652	-0.929466	0.352649	0.417762
181	O95169	NDUFB8	-0.194531	-0.0193233	-0.92754	0.353648	0.418636
1077	Q86UW8	HAPLN4	-0.194545	-0.007982	-0.926587	0.354142	0.418912
1468	Q9UBS5	GABBR1	-0.19409	-0.0213546	-0.925496	0.354709	0.419273
1414	Q9NTK5	OLA1	-0.186299	0.112356	-0.924483	0.355236	0.419587
868	Q13561	DCTN2	-0.193465	0.0280481	-0.919536	0.357816	0.422238
1216	Q96AQ6	PBXIP1	-0.189714	0.0721032	-0.919171	0.358007	0.422238
489	P31946	YWHAB	-0.190487	0.0599858	-0.916907	0.359193	0.423025
1280	Q99733	NAP1L4	-0.190883	0.0557422	-0.916889	0.359202	0.423025
155	O75936	BBOX1	-0.189051	0.0726644	-0.916243	0.359541	0.423113
334	P12277	CKB	-0.192685	0.0239988	-0.914966	0.360211	0.423591
767	P80723	BASP1	-0.190944	-0.0377812	-0.912631	0.361438	0.424723
525	P39019	RPS19	-0.184885	-0.0809837	-0.910903	0.362348	0.42548
446	P26885	FKBP2	-0.184349	0.103878	-0.910138	0.362751	0.425642
508	P35612	ADD2	-0.191085	-0.0047503	-0.90954	0.363067	0.425701
1375	Q9HAV7	GRPEL1	-0.181645	0.123842	-0.907725	0.364025	0.426513
1332	Q9H078	CLPB	-0.190375	-0.00339056	-0.905772	0.365058	0.427411
806	Q02978	SLC25A11	-0.184522	-0.0673159	-0.900751	0.367722	0.430216
103	O60268	KIAA0513	-0.182109	0.105402	-0.899905	0.368172	0.430429
591	P49458	SRP9	-0.188291	-0.0352235	-0.899165	0.368566	0.430576
469	P30044	PRDX5	-0.181394	0.10761	-0.897563	0.36942	0.431259
1377	Q9HB71	CACYBP	-0.18771	0.0187518	-0.890433	0.373235	0.435395
615	P51572	BCAP31	0.185904	0.0473608	0.889541	0.373714	0.435637
394	P20339	RAB5A	-0.185567	-0.0403877	-0.887875	0.374609	0.436364
294	P09493	TPM1	-0.184843	-0.044077	-0.886363	0.375423	0.436995
884	Q14152	EIF3A	-0.18196	0.0776654	-0.884414	0.376474	0.4379
465	P29966	MARCKS	-0.182726	-0.0554704	-0.883845	0.376781	0.43794
456	P27824	CANX	-0.182931	0.0648831	-0.882789	0.377352	0.438128
683	P61106	RAB14	-0.183503	-0.048195	-0.882535	0.377489	0.438128
151	O75891	ALDH1L1	-0.179388	0.0937613	-0.880284	0.378707	0.439223
827	Q08752	PPID	-0.184785	0.0305103	-0.878799	0.379512	0.439839
1463	Q9UBB6	NCDN	-0.17939	0.0848687	-0.875626	0.381235	0.441517
734	P62899	RPL31	-0.176697	-0.0881723	-0.87441	0.381896	0.441964
470	P30049	ATP5F1D	-0.183192	-0.0225061	-0.873557	0.382361	0.442182
316	P10915	HAPLN1	-0.181977	-0.0421497	-0.871613	0.383421	0.443089
733	P62888	RPL30	-0.182733	-0.01556	-0.871098	0.383702	0.443095
305	P0DP25	CALM3	-0.177653	-0.0591294	-0.861822	0.388787	0.448643
1154	Q8TBM8	DNAJB14	-0.179891	-0.0380181	-0.859887	0.389852	0.44955
976	Q4G0F5	VPS26B	-0.176297	0.0805855	-0.858351	0.3907	0.450203
96	O43765	SGTA	-0.174928	0.0860275	-0.854434	0.392866	0.451885
581	P48651	PTDSS1	-0.178607	-0.0394716	-0.854251	0.392967	0.451885
1022	Q6IBS0	TWF2	-0.177683	0.0570547	-0.854022	0.393094	0.451885
856	Q13423	NNT	-0.177094	0.0608758	-0.852821	0.39376	0.451885
127	O75165	DNAJC13	-0.175452	0.0775549	-0.852725	0.393813	0.451885
1225	Q96DA2	RAB39B	-0.178923	-0.0120088	-0.852659	0.39385	0.451885
1133	Q8N987	NECAB1	-0.174561	0.0848677	-0.852055	0.394185	0.451946
1309	Q9BWM7	SFXN3	-0.175295	-0.0550421	-0.847613	0.396655	0.454124
63	O15144	ARPC2	-0.17793	-0.00603894	-0.847135	0.396921	0.454124
978	Q4J6C6	PREPL	-0.176175	0.0570897	-0.846785	0.397116	0.454124
164	O94760	DDAH1	-0.177384	0.0410343	-0.846529	0.397259	0.454124
1314	Q9BXS5	AP1M1	-0.17386	0.0798031	-0.846097	0.3975	0.454124
1226	Q96DA6	DNAJC19	-0.17554	-0.047977	-0.844098	0.398616	0.455075
1052	Q7L1Q6	BZW1	-0.175168	0.058826	-0.842679	0.399409	0.455528
129	O75190	DNAJB6	-0.173115	-0.0630064	-0.842372	0.399581	0.455528
658	P55786	NPEPPS	-0.175792	0.0388172	-0.838214	0.401912	0.45786
1497	Q9UK22	FBXO2	-0.172533	0.0735102	-0.83659	0.402825	0.458574
713	P62269	RPS18	-0.167095	-0.0989757	-0.832656	0.40504	0.460769
1080	Q86W74	ANKRD46	-0.173949	0.0411748	-0.830183	0.406436	0.46203
1081	Q86WG3	ATCAY	-0.170861	0.0760023	-0.829668	0.406728	0.462034
1597	Q9Y6F6	IRAG1	-0.174601	0.00920802	-0.827815	0.407777	0.462897
451	P27361	MAPK3	-0.165428	0.117313	-0.823391	0.410287	0.465417
938	Q15382	RHEB	-0.169347	-0.0587966	-0.821316	0.411467	0.466427
925	Q15121	PEA15	-0.165329	0.108748	-0.818634	0.412996	0.467829
37	O14562	UBFD1	-0.166466	0.0927608	-0.816383	0.414283	0.468955
896	Q14254	FLOT2	-0.168218	-0.0562838	-0.814201	0.415531	0.469973
570	P46977	STT3A	-0.17165	0.0142947	-0.813787	0.415768	0.469973
1298	Q9BRQ6	CHCHD6	-0.164173	-0.0820565	-0.80939	0.418292	0.472494
604	P50583	NUDT2	-0.168712	0.0503829	-0.808366	0.418881	0.472826
182	O95182	NDUFA7	-0.168229	-0.0277837	-0.802459	0.422288	0.476337
478	P30519	HMOX2	-0.168958	0.018218	-0.801403	0.4229	0.476691
1098	Q8IWT6	LRRC8A	-0.167665	-0.0326371	-0.80028	0.42355	0.477089
893	Q14240	EIF4A2	-0.165443	0.0646251	-0.79829	0.424703	0.478052
267	P07237	P4HB	-0.167042	0.0252458	-0.793428	0.42753	0.480896
512	P36405	ARL3	-0.165206	0.046787	-0.790309	0.429348	0.482603
291	P09382	LGALS1	-0.16522	0.0437912	-0.789357	0.429904	0.48266
714	P62277	RPS13	-0.159362	-0.0893511	-0.789192	0.430001	0.48266
9	O00154	ACOT7	-0.164127	0.0533972	-0.787492	0.430995	0.483438
670	P60174	TPI1	-0.160969	0.0844705	-0.785526	0.432146	0.48439
1599	Q9Y6I3	EPN1	-0.159688	0.093719	-0.783593	0.43328	0.485036
157	O75955	FLOT1	-0.163047	-0.047087	-0.783513	0.433327	0.485036
588	P49418	AMPH	-0.162157	0.0536246	-0.778124	0.436497	0.488244
288	P08865	RPSA	-0.159145	-0.0655664	-0.775865	0.43783	0.489393
777	P99999	CYCS	-0.163312	0.0128023	-0.774206	0.43881	0.490147
1252	Q96N66	MBOAT7	-0.161888	-0.00848997	-0.771122	0.440636	0.491754
261	P07093	SERPINE2	-0.156963	-0.0758528	-0.770741	0.440861	0.491754
462	P29120	PCSK1	-0.16109	-0.0274181	-0.768373	0.442267	0.492979
808	Q04837	SSBP1	-0.160736	-0.0350567	-0.767551	0.442755	0.49318
1490	Q9UII2	ATP5IF1	-0.159651	-0.0450607	-0.766048	0.443649	0.493833
468	P30043	BLVRB	-0.154678	0.102943	-0.763224	0.445331	0.495361
1104	Q8IZP0	ABI1	-0.16039	0.00991546	-0.760422	0.447004	0.496877
23	O00479	HMGN4	-0.15145	-0.107523	-0.759348	0.447646	0.497246
1287	Q99961	SH3GL1	-0.156038	0.0754542	-0.757452	0.448781	0.497975
366	P17096	HMGA1	-0.150147	-0.115483	-0.757214	0.448923	0.497975
301	P09936	UCHL1	-0.151269	0.121231	-0.754721	0.450417	0.499288
772	P84077	ARF1	-0.157109	0.00366948	-0.745752	0.455818	0.504926
15	O00264	PGRMC1	-0.153358	0.0744565	-0.744015	0.456869	0.505521
257	P06744	GPI	-0.148584	0.1267	-0.743822	0.456986	0.505521
691	P61266	STX1B	-0.155732	0.0069851	-0.738658	0.460116	0.508633
1435	Q9NZ45	CISD1	-0.154404	-0.0308898	-0.73677	0.461263	0.50955
786	Q00765	REEP5	-0.148332	-0.0815143	-0.731047	0.464751	0.512681
1253	Q96NN9	AIFM3	-0.153724	0.0288859	-0.730793	0.464907	0.512681
639	P53999	SUB1	-0.153196	-0.0231488	-0.730547	0.465057	0.512681
1221	Q96C19	EFHD2	-0.153678	0.0217329	-0.729388	0.465765	0.513109
1023	Q6KCM7	SLC25A25	-0.15222	-0.0360411	-0.727033	0.467207	0.514344
393	P20336	RAB3A	-0.152305	0.0081517	-0.722246	0.470144	0.517223
769	P82909	MRPS36	-0.147381	-0.0594989	-0.71518	0.474499	0.521656
209	P00568	AK1	-0.141547	0.119343	-0.705396	0.480565	0.527963
1491	Q9UIJ7	AK3	-0.147746	-0.0128066	-0.704152	0.481339	0.528452
180	O95168	NDUFB4	-0.147787	-0.00330162	-0.70312	0.481982	0.528795
111	O60641	SNAP91	-0.148134	0.0168195	-0.702501	0.482368	0.528857
1331	Q9H061	TMEM126A	-0.146697	-0.025585	-0.699638	0.484154	0.53018
1404	Q9NRP0	OSTC	-0.147364	0.0224306	-0.699508	0.484236	0.53018
822	Q08257	CRYZ	-0.146475	0.0254815	-0.695774	0.486571	0.532374
1002	Q5T848	GPR158	-0.145732	0.0174063	-0.691159	0.489467	0.534896
384	P18669	PGAM1	-0.140325	0.0996635	-0.691037	0.489544	0.534896
834	Q12906	ILF3	-0.144887	-0.00626441	-0.689847	0.490292	0.535349
200	O96000	NDUFB10	-0.144207	-0.0369536	-0.689017	0.490814	0.535555
1512	Q9UNZ2	NSFL1C	-0.138935	0.0986521	-0.683779	0.494116	0.538791
1236	Q96GW7	BCAN	-0.141455	-0.0482893	-0.680356	0.49628	0.540691
275	P07900	HSP90AA1	-0.138007	0.100478	-0.679957	0.496532	0.540691
1158	Q8TCZ2	CD99L2	-0.142076	-0.0364201	-0.678687	0.497337	0.5412
1389	Q9NP97	DYNLRB1	-0.141889	-0.0054098	-0.675459	0.499385	0.54306
682	P61088	UBE2N	-0.139519	0.046703	-0.667404	0.504515	0.548267
1591	Q9Y639	NPTN	-0.140373	0.00116635	-0.666848	0.50487	0.548282
660	P56134	ATP5MF	-0.139309	-0.0250782	-0.664388	0.506443	0.549617
742	P63027	VAMP2	-0.139551	0.000852795	-0.663008	0.507327	0.550204
279	P08195	SLC3A2	-0.138134	-0.0371781	-0.66006	0.509216	0.55188
832	Q12797	ASPH	-0.138218	0.0165349	-0.655454	0.512177	0.554531
967	Q16864	ATP6V1F	-0.137236	-0.0337903	-0.655179	0.512353	0.554531
573	P47870	GABRB2	-0.135539	-0.0479091	-0.651717	0.514584	0.55657
1467	Q9UBQ0	VPS29	-0.130449	0.0914262	-0.639237	0.52267	0.564934
1030	Q6P2I7	EBLN2	-0.134192	0.0198197	-0.636683	0.524333	0.56635
1354	Q9H444	CHMP4B	-0.125648	-0.117303	-0.634501	0.525755	0.567504
1159	Q8TD22	SFXN5	-0.132596	-0.0356336	-0.633245	0.526575	0.568007
1326	Q9GZT4	SRR	-0.132737	-0.0112641	-0.632502	0.52706	0.568148
150	O75880	SCO1	-0.126878	0.116947	-0.631374	0.527797	0.56856
91	O43676	NDUFB3	-0.13026	-0.0286033	-0.621403	0.534335	0.575217
874	Q13642	FHL1	-0.129533	-0.018221	-0.617603	0.536838	0.57716
905	Q14697	GANAB	-0.122848	0.132983	-0.617392	0.536977	0.57716
948	Q15907	RAB11B	-0.130081	0.0184511	-0.617025	0.537219	0.57716
764	P78527	PRKDC	-0.129268	-0.0160314	-0.616248	0.537732	0.577324
1235	Q96GD0	PDXP	-0.127138	0.0658069	-0.613848	0.539317	0.578638
277	P07954	FH	-0.127854	0.048258	-0.612014	0.54053	0.579552
602	P50213	IDH3A	-0.124455	0.0895479	-0.609178	0.542407	0.581177
727	P62826	RAN	-0.125903	0.0521821	-0.603743	0.546015	0.584652
1129	Q8N6D5	ANKRD29	-0.126516	0.00757373	-0.600016	0.548496	0.586296
55	O14979	HNRNPDL	-0.119803	0.12701	-0.599857	0.548602	0.586296
1601	Q9Y6M9	NDUFB9	-0.125827	-0.0147755	-0.59979	0.548647	0.586296
689	P61225	RAP2B	-0.124819	-0.0456238	-0.599163	0.549065	0.586351
1085	Q86Y82	STX12	-0.124098	-0.00460683	-0.590676	0.554739	0.591844
726	P62820	RAB1A	-0.123785	-0.0255645	-0.590366	0.554946	0.591844
962	Q16795	NDUFA9	-0.122355	-0.0326421	-0.584012	0.559213	0.595928
1293	Q9BQE5	APOL2	-0.122987	0.00504667	-0.583558	0.559519	0.595928
852	Q13332	PTPRS	-0.122231	-0.00883655	-0.582263	0.560391	0.596461
1297	Q9BRK0	REEP2	-0.118727	-0.0673282	-0.579575	0.562202	0.597992
886	Q14165	MLEC	-0.115399	0.102637	-0.569306	0.569149	0.60498
381	P18505	GABRB1	-0.117042	-0.0534792	-0.565232	0.571917	0.607433
317	P11021	HSPA5	-0.118996	0.00506134	-0.564618	0.572335	0.607433
1248	Q96KP4	CNDP2	-0.116906	0.0636706	-0.563804	0.572888	0.607433
238	P05067	APP	-0.0994967	0.309202	-0.563681	0.572972	0.607433
370	P17302	GJA1	-0.117246	0.0336481	-0.55808	0.57679	0.611078
220	P03891	MT-ND2	-0.116772	-0.0270493	-0.556959	0.577556	0.611485
817	Q07065	CKAP4	-0.113683	-0.0595729	-0.551688	0.581163	0.614898
254	P06576	ATP5F1B	-0.11536	-0.0341219	-0.550774	0.581789	0.615155
1349	Q9H3K2	GHITM	-0.115116	-0.0298372	-0.549233	0.582846	0.615867
723	P62750	RPL23A	-0.110321	-0.0810853	-0.543568	0.586739	0.619572
1288	Q99962	SH3GL2	-0.11121	0.0850973	-0.542906	0.587195	0.619645
40	O14594	NCAN	-0.110956	-0.0625566	-0.539725	0.589388	0.62155
90	O43674	NDUFB5	-0.112854	-0.0304166	-0.538475	0.59025	0.622051
914	Q15006	EMC2	-0.11231	-0.0350743	-0.536307	0.591747	0.623219
1445	Q9P0J0	NDUFA13	-0.11229	-0.028634	-0.535679	0.592181	0.623267
1509	Q9UN86	G3BP2	-0.111908	-0.00515822	-0.532711	0.594234	0.625018
73	O43181	NDUFS4	-0.111351	-0.02808	-0.531165	0.595305	0.625734
234	P04844	RPN2	-0.111242	0.00244997	-0.528239	0.597334	0.627455
159	O75964	ATP5MG	-0.110686	0.000914805	-0.52586	0.598986	0.628779
102	O43920	NDUFS5	-0.110437	0.00320027	-0.524294	0.600075	0.62951
12	O00217	NDUFS8	-0.108606	-0.013811	-0.517667	0.604691	0.633938
1291	Q9BPX5	ARPC5L	-0.107783	0.00380872	-0.51159	0.608938	0.637973
763	P78417	GSTO1	-0.106532	0.0415584	-0.508509	0.611097	0.639817
622	P51970	NDUFA8	-0.106253	-0.0146591	-0.506484	0.612518	0.640577
1157	Q8TCJ2	STT3B	-0.106162	-0.0262929	-0.506335	0.612622	0.640577
1485	Q9UI09	NDUFA12	-0.104869	-0.0372394	-0.501121	0.616287	0.643989
1542	Q9Y2B0	CNPY2	-0.0981256	0.145553	-0.497076	0.619136	0.646322
153	O75915	ARL6IP5	-0.104302	-0.00266749	-0.496129	0.619804	0.646322
143	O75489	NDUFS3	-0.10393	-0.0302529	-0.495886	0.619976	0.646322
932	Q15293	RCN1	-0.101056	0.0929887	-0.495666	0.620131	0.646322
853	Q13363	CTBP1	-0.103805	-0.00764865	-0.494376	0.621041	0.646851
1364	Q9H7Z7	PTGES2	0.103182	0.00426948	0.489682	0.624359	0.649885
498	P35080	PFN2	-0.100145	0.069382	-0.484466	0.628056	0.653308
982	Q53FP2	TMEM35A	-0.100334	0.00343828	-0.476291	0.633867	0.658926
109	O60506	SYNCRIP	-0.098448	0.0265141	-0.467751	0.639963	0.664832
521	P37840	SNCA	-0.0968612	0.0272721	-0.460294	0.645306	0.669948
1227	Q96E17	RAB3C	-0.0921276	0.107368	-0.455795	0.648538	0.672869
475	P30101	PDIA3	-0.0914428	0.112916	-0.453926	0.649883	0.673828
1230	Q96F85	CNRIP1	-0.090584	0.11121	-0.449198	0.653289	0.676922
362	P16112	ACAN	-0.0936263	-0.0137606	-0.446266	0.655406	0.678677
403	P21579	SYT1	-0.0928428	-0.0341454	-0.443271	0.65757	0.680298
295	P09496	CLTA	-0.0898852	0.100724	-0.442926	0.65782	0.680298
137	O75380	NDUFS6	-0.0924744	-0.00456345	-0.44015	0.659829	0.681936
549	P43004	SLC1A2	-0.0917191	-0.0246448	-0.437413	0.661812	0.683546
324	P11217	PYGM	-0.0877005	0.0849033	-0.428087	0.668588	0.6901
1470	Q9UDW1	UQCR10	0.0865873	-0.00569773	0.41222	0.680179	0.701595
210	P01034	CST3	-0.0865724	-0.00161049	-0.411646	0.6806	0.701595
661	P56181	NDUFV3	-0.0859386	-0.0274748	-0.409915	0.681869	0.702452
71	O43169	CYB5B	-0.085545	-0.0367137	-0.408692	0.682766	0.702902
665	P56556	NDUFA6	-0.0855326	-0.0306532	-0.408125	0.683182	0.702902
1277	Q99623	PHB2	-0.0850154	-0.0428297	-0.407364	0.683742	0.703027
191	O95674	CDS2	0.084443	-0.0266554	0.402753	0.68713	0.706058
1033	Q6PIU2	NCEH1	-0.0824865	0.0516284	-0.395448	0.692513	0.710836
50	O14949	UQCRQ	-0.0831814	0.000503701	-0.395239	0.692667	0.710836
357	P15104	GLUL	-0.0830772	0.00464493	-0.39422	0.693419	0.711153
1152	Q8TAC9	SCAMP5	-0.0798403	-0.0440234	-0.382839	0.701839	0.719329
1245	Q96JJ7	TMX3	-0.0759869	0.103642	-0.375097	0.707589	0.724353
219	P03886	MT-ND1	-0.0786356	-0.0249671	-0.375023	0.707644	0.724353
178	O95139	NDUFB6	-0.0767233	-0.032213	-0.366177	0.714233	0.730632
221	P03915	MT-ND5	-0.0761595	-0.0393472	-0.364241	0.715678	0.731643
930	Q15257	PTPA	-0.0737237	0.0972925	-0.36254	0.716949	0.732476
1565	Q9Y3E7	CHMP3	-0.0754941	-0.0129686	-0.359808	0.718991	0.734094
371	P17568	NDUFB7	-0.0725822	-0.0213886	-0.3461	0.729268	0.744113
1124	Q8N5K1	CISD2	-0.0686294	-0.0065331	-0.32678	0.743835	0.758494
803	Q02790	FKBP4	-0.0640438	0.109193	-0.317201	0.751091	0.765287
773	P84085	ARF5	-0.0668045	0.0145609	-0.316727	0.751451	0.765287
44	O14807	MRAS	-0.0657444	-0.0253375	-0.313549	0.753864	0.767257
1587	Q9Y5K8	ATP6V1D	-0.0650741	-0.0415794	-0.311579	0.755361	0.768294
402	P21397	MAOA	0.062057	0.022849	0.294599	0.768301	0.780959
296	P09497	CLTB	-0.0592221	0.0909855	-0.290129	0.771718	0.783937
184	O95202	LETM1	-0.0602833	-0.0183316	-0.287427	0.773786	0.78554
1300	Q9BRX8	PRXL2A	-0.059791	0.0105416	-0.283468	0.776818	0.788119
738	P62937	PPIA	-0.0566897	0.120063	-0.282637	0.777455	0.788267
1178	Q8WY22	BRI3BP	0.0590843	-0.0257462	0.281792	0.778104	0.788426
947	Q15904	ATP6AP1	-0.0508354	-0.0330699	-0.242661	0.808268	0.818474
1581	Q9Y4L1	HYOU1	-0.0437265	0.0457832	-0.209087	0.834381	0.844383
1036	Q6UW68	TMEM205	-0.043739	0.02995	-0.207985	0.835241	0.84439
663	P56378	ATP5MJ	-0.04348	-0.0367513	-0.207729	0.83544	0.84439
352	P14625	HSP90B1	-0.0371314	0.0978691	-0.182658	0.855066	0.863682
901	Q14515	SPARCL1	-0.0380705	0.0192723	-0.18061	0.856674	0.86476
418	P22748	CA4	0.0342701	-0.104496	0.171445	0.863874	0.871481
1315	Q9BY11	PACSIN1	-0.0341347	-0.000931995	-0.16227	0.871093	0.878211
1370	Q9H9B4	SFXN1	-0.0335803	-0.0282964	-0.160188	0.872733	0.879311
241	P05109	S100A8	-0.0307952	-0.0380587	-0.147205	0.88297	0.889068
315	P10909	CLU	0.0302815	0.0493032	0.14502	0.884695	0.890245
625	P52565	ARHGDIA	-0.0282295	0.0792728	-0.137337	0.890764	0.895791
1482	Q9UHQ4	BCAP29	-0.0244964	-0.0419499	-0.117316	0.90661	0.911154
1136	Q8N9I0	SYT2	0.0181308	0.0832856	0.088416	0.929546	0.933621
1348	Q9H330	TMEM245	0.0184835	0.0182737	0.087672	0.930138	0.93363
491	P32004	L1CAM	-0.0174437	0.0502656	-0.0835751	0.933394	0.936313
1405	Q9NRW1	RAB6B	-0.012008	0.0333534	-0.0571523	0.954424	0.95681
429	P23763	VAMP1	-0.00744595	0.0462501	-0.0356114	0.971592	0.973413
454	P27797	CALR	0.00427818	0.156024	0.0218186	0.982593	0.983819
664	P56385	ATP5ME	0.00441029	-0.00797685	0.0210055	0.983241	0.983855
548	P43003	SLC1A3	0.000544431	-0.044902	0.00261202	0.997916	0.997916
