# Supplementary material for: Targeting the Post-Synaptic Proteome in Alzheimer Disease with Psychosis
Source: Research Square preprint supplement (doi:10.21203/rs.3.rs-1514870/v1), 2022-04-04
Supplement: Supplementary file 6 [file b6ec365e3b293be7cd153534.xlsx]

## Sheet: Table S6 50 regulator genes
Gene perturbation score	Gene perturbation group	Gene perturbations	# Studies	Correlation with Query
100	Gene knockout	TLK2	3	positive
97.4311	Gene knockout	SOHLH2	1	negative
97.4311	Gene knockout	SOHLH1	1	negative
91.3046	Gene knockout	RPS6	9	negative
91.1786	Gene knockout	CHMP2A	4	positive
90.5767	Gene knockout	MAST4	2	positive
88.098	Gene knockout	GNAS	1	positive
86.5123	Gene knockout	CRKL	5	positive
86.2333	Gene knockout	JUN	4	positive
86.0989	Gene knockout	DIDO1	4	positive
84.849	Gene knockout	RNASEL	1	negative
84.3171	Gene knockout	MTOR	3	positive
84.2138	Gene knockout	AURKB	8	negative
84.0004	Gene knockout	CTSK	5	negative
83.1641	Gene knockout	EN2	1	positive
82.4141	Gene knockout	SMAD2	4	positive
80.8501	Gene knockout	EXO1	3	positive
80.6987	Gene knockout	CCR5	1	negative
80.3238	Gene knockout	LCK	1	positive
79.5999	Gene knockout	FASN	3	positive
78.2646	Gene knockout	DOHH	1	negative
77.6025	Gene knockout	FN1	1	positive
77.5198	Gene knockout	CXCR4	2	positive
76.2206	Gene knockout	ANLN	1	positive
76.1681	Gene knockout	CAMK1	2	positive
76.0349	Gene knockout	LCP2	1	positive
74.1118	Gene knockout	RRN3	1	positive
73.846	Gene knockout	GJB1	1	positive
73.5896	Gene knockout	DOCK5	1	negative
73.428	Gene knockout	PFDN2	2	positive
73.2525	Gene knockout	KRT19	2	negative
72.8474	Gene knockout	AKT2	3	positive
72.8204	Gene knockout	PNPLA2	1	negative
72.7022	Gene knockout	INSM2	1	negative
72.2105	Gene knockout	ELF3	1	negative
72.0713	Gene knockout	Ptger4	1	negative
72.027	Gene knockout	LIPE	1	negative
71.4348	Gene knockout	ABCE1	1	positive
70.1122	Gene knockout	SENP1	1	negative
69.4622	Gene knockout	KLF13	1	negative
69.4003	Gene knockout	PTEN	13	positive
69.3963	Gene knockout	KEAP1	5	negative
69.3758	Gene knockout	DNMT3B	6	positive
68.7907	Gene knockout	PCDH12	1	negative
68.2027	Gene knockout	ZIC3	1	negative
68.0904	Gene knockout	RAG1	1	negative
67.7224	Gene knockout	TLR9	1	positive
67.7043	Gene knockout	DNMT1	4	negative
67.3736	Gene knockout	STRAP	1	positive
67.0373	Gene knockout	DGCR8	2	negative
