# Supplementary material for: Targeting the Post-Synaptic Proteome in Alzheimer Disease with Psychosis
Source: Research Square preprint supplement (doi:10.21203/rs.3.rs-1514870/v1), 2022-04-04
Supplement: Supplementary file 8 [file e8e0128759ac6168cd15773c.xlsx]

## Sheet: Legend
Column Header	Definition
protein	Uniprot Accession #
external gene name	Official Gene Symbol
logFC	Log Base 2 of the Fold Change of AD+P relative to AD-P, adjusted for clinical variables
AveExpr AD+P	Average expression across all AD+P samples, in log2
AveExpr AD-P	Average expression across all AD-P samples, in log2
AveExpr Control	Average expression across all samples, in log2
t	t statistic
P.Value
q.value

## Sheet: AD+P vs Control
protein	external gene name	logFC	AveExpr AD+P	AveExpr Control	t	P.Value	q.value
P05067	APP	2.02266	0.307128	-1.72502	7.61948	2.55858e-14	4.10396e-11
P02768	ALB	-1.25921	-0.271703	0.826706	-4.75096	2.02603e-06	0.00162488
P68871	HBB	-1.17773	-0.275682	0.84172	-4.38168	1.17831e-05	0.00592217
Q8N3V7	SYNPO	-1.1609	-0.397482	0.63235	-4.33223	1.47685e-05	0.00592217
Q9HD42	CHMP1A	-1.14842	-0.359624	0.758894	-4.26919	1.9628e-05	0.00629665
O76070	SNCG	-1.1129	-0.274222	0.602911	-4.18961	2.79565e-05	0.00658716
P49419	ALDH7A1	-1.10658	-0.311058	0.606447	-4.15509	3.25297e-05	0.00658716
P51674	GPM6A	-1.11955	-0.284591	0.682942	-4.15283	3.28537e-05	0.00658716
Q16566	CAMK4	-1.1087	-0.384619	0.677286	-4.10247	4.08932e-05	0.00722663
Q14244	MAP7	-1.08257	-0.330568	0.58418	-4.08	4.50538e-05	0.00722663
P20810	CAST	-1.09155	-0.32024	0.644111	-4.03011	5.57712e-05	0.00756871
Q16531	DDB1	-1.07577	-0.374015	0.594677	-4.01441	5.96186e-05	0.00756871
Q674X7	KAZN	-1.06154	-0.342169	0.660837	-3.99826	6.38337e-05	0.00756871
Q6NV74	CRACDL	-1.06861	-0.384969	0.596746	-3.96512	7.33846e-05	0.00756871
Q8IVF2	AHNAK2	-1.0521	-0.355543	0.573709	-3.96468	7.35219e-05	0.00756871
P13591	NCAM1	-1.06077	-0.281046	0.598137	-3.95834	7.54984e-05	0.00756871
Q9NQX3	GPHN	-1.06753	-0.35753	0.650529	-3.90836	9.29551e-05	0.00877059
Q16851	UGP2	-1.01043	-0.249933	0.635191	-3.78884	0.000151397	0.0127353
Q86UE4	MTDH	-1.00172	-0.306491	0.52525	-3.77867	0.000157718	0.0127353
P21912	SDHB	-1.00092	-0.25418	0.614257	-3.77195	0.000162026	0.0127353
P35609	ACTN2	-1.00281	-0.343675	0.549697	-3.7648	0.000166734	0.0127353
P78324	SIRPA	-0.998849	-0.27015	0.584533	-3.74881	0.00017773	0.0129582
P07195	LDHB	-0.983448	-0.240039	0.58231	-3.67994	0.000233356	0.0158547
Q96PB7	OLFM3	-0.974278	-0.316792	0.613548	-3.67574	0.000237227	0.0158547
P46781	RPS9	-0.964168	-0.27335	0.537951	-3.63774	0.000275113	0.0176513
Q9C0D0	PHACTR1	-0.959999	-0.375511	0.584983	-3.61156	0.000304441	0.0186997
P11441	UBL4A	-0.947399	-0.293503	0.516194	-3.57328	0.000352619	0.0186997
P17096	HMGA1	-0.947656	-0.191807	0.644272	-3.57058	0.000356275	0.0186997
P27816	MAP4	-0.967085	-0.288838	0.513851	-3.56993	0.000357165	0.0186997
P07099	EPHX1	-0.952453	-0.255965	0.632588	-3.56786	0.000359992	0.0186997
P12814	ACTN1	-0.944708	-0.317716	0.517094	-3.56301	0.000366712	0.0186997
Q09666	AHNAK	-0.963548	-0.306603	0.534021	-3.5578	0.00037407	0.0186997
Q15388	TOMM20	-0.970912	-0.33496	0.538329	-3.54476	0.000393059	0.0186997
Q16352	INA	-0.937911	-0.27658	0.448381	-3.53506	0.000407782	0.0186997
P27797	CALR	0.956196	0.21533	-0.870448	3.53489	0.000408035	0.0186997
Q7Z6L0	PRRT2	-0.941151	-0.290052	0.551168	-3.52402	0.000425149	0.0189428
O94856	NFASC	-0.933166	-0.277264	0.452302	-3.50913	0.000449676	0.0194941
P08243	ASNS	-0.941864	-0.28999	0.586879	-3.48393	0.000494225	0.0199693
P15880	RPS2	-0.924466	-0.25807	0.539342	-3.48367	0.0004947	0.0199693
O43759	SYNGR1	-0.923311	-0.30011	0.506184	-3.4819	0.000497988	0.0199693
Q9HCC0	MCCC2	-0.934465	-0.288959	0.609728	-3.46835	0.00052378	0.020016
P24821	TNC	-0.932685	-0.272933	0.502338	-3.46818	0.00052411	0.020016
P39023	RPL3	-0.914302	-0.276592	0.525407	-3.44303	0.00057535	0.0212809
P08670	VIM	-0.912755	-0.24525	0.507902	-3.43269	0.00059775	0.0212809
P17174	GOT1	-0.914308	-0.262264	0.431738	-3.42845	0.000607175	0.0212809
P62913	RPL11	-0.916337	-0.255545	0.543065	-3.42705	0.000610301	0.0212809
Q14764	MVP	-0.906809	-0.274791	0.478374	-3.41653	0.000634387	0.0216501
Q9Y2B0	CNPY2	0.904007	0.157499	-0.812033	3.3988	0.000676961	0.0226218
Q07020	RPL18	-0.922955	-0.250164	0.522506	-3.38989	0.000699341	0.0228927
Q6IAN0	DHRS7B	-0.892301	-0.343288	0.511413	-3.36365	0.000769341	0.0237318
Q96A23	CPNE4	-0.912079	-0.323113	0.495481	-3.35787	0.000785623	0.0237318
P35268	RPL22	-0.889757	-0.237238	0.549458	-3.35615	0.000790502	0.0237318
Q9H444	CHMP4B	-0.900369	-0.229958	0.654428	-3.35407	0.000796478	0.0237318
O00479	HMGN4	-0.903612	-0.191927	0.599866	-3.35321	0.000798951	0.0237318
P60033	CD81	-0.885621	-0.260531	0.408717	-3.34116	0.00083445	0.0237386
P46779	RPL28	-0.9014	-0.297426	0.512298	-3.33728	0.000846194	0.0237386
P50993	ATP1A2	-0.887412	-0.258607	0.527468	-3.33601	0.000850078	0.0237386
Q9NWV8	BABAM1	-0.898589	-0.303265	0.485051	-3.3333	0.000858377	0.0237386
P62424	RPL7A	-0.891011	-0.264714	0.514998	-3.31458	0.000917966	0.0249562
P30050	RPL12	-0.880883	-0.263439	0.502092	-3.30369	0.000954402	0.0251087
P61313	RPL15	-0.889148	-0.249914	0.520299	-3.30042	0.000965593	0.0251087
P62266	RPS23	-0.896838	-0.269107	0.515825	-3.29607	0.000980659	0.0251087
Q9Y6R1	SLC4A4	-0.882773	-0.288106	0.473053	-3.29233	0.000993793	0.0251087
O43865	AHCYL1	-0.872334	-0.311055	0.443536	-3.29006	0.00100184	0.0251087
Q8N387	MUC15	-0.893839	-0.337063	0.451117	-3.2804	0.00103678	0.0253072
Q8IWA5	SLC44A2	-0.872709	-0.258344	0.427625	-3.27694	0.00104958	0.0253072
P42262	GRIA2	-0.867812	-0.328438	0.503633	-3.27408	0.00106027	0.0253072
P61601	NCALD	-0.88518	-0.286817	0.429326	-3.27042	0.00107407	0.0253072
P01857	IGHG1	-0.864637	-0.251934	0.544774	-3.26258	0.00110421	0.0253072
Q96SB3	PPP1R9B	-0.870992	-0.324343	0.48832	-3.26253	0.00110443	0.0253072
O14490	DLGAP1	-0.873086	-0.344829	0.472865	-3.25592	0.00113044	0.0255384
P40925	MDH1	-0.866504	-0.2247	0.468852	-3.24656	0.00116829	0.0260269
P05023	ATP1A1	-0.86111	-0.277903	0.460949	-3.23867	0.00120108	0.0263908
P62269	RPS18	-0.863938	-0.20097	0.55218	-3.22035	0.00128057	0.0277573
P05388	RPLP0	-0.866381	-0.276894	0.500598	-3.21507	0.00130432	0.0278951
Q9UHD2	TBK1	-0.865306	-0.346619	0.483339	-3.20527	0.00134958	0.0284144
Q99784	OLFM1	-0.865027	-0.253914	0.605552	-3.2007	0.00137118	0.0284144
Q9BZV1	UBXN6	-0.848698	-0.323285	0.463294	-3.19848	0.00138175	0.0284144
Q12979	ABR	-0.86003	-0.334982	0.499936	-3.18602	0.00144266	0.0291212
Q02543	RPL18A	-0.868736	-0.264918	0.499925	-3.18183	0.00146369	0.0291212
P18124	RPL7	-0.869423	-0.223048	0.524402	-3.17671	0.0014898	0.0291212
P62851	RPS25	-0.841933	-0.240232	0.503533	-3.17225	0.00151288	0.0291212
Q01105	SET	-0.840584	-0.183117	0.429911	-3.16719	0.00153942	0.0291212
P08247	SYP	-0.840887	-0.245725	0.509273	-3.15859	0.00158557	0.0291212
P04156	PRNP	-0.842513	-0.238151	0.458357	-3.15579	0.00160086	0.0291212
P21926	CD9	-0.842559	-0.206909	0.362774	-3.15436	0.00160873	0.0291212
P62244	RPS15A	-0.836491	-0.235644	0.461021	-3.15366	0.00161261	0.0291212
Q86YM7	HOMER1	-0.840652	-0.287941	0.422085	-3.15317	0.00161531	0.0291212
P32189	GK	-0.848306	-0.307918	0.448884	-3.15304	0.00161605	0.0291212
P62081	RPS7	-0.84002	-0.20781	0.492762	-3.14401	0.00166678	0.0291212
P60484	PTEN	-0.834615	-0.312399	0.501898	-3.14148	0.00168123	0.0291212
Q8N145	LGI3	-0.83399	-0.226353	0.436972	-3.14027	0.00168817	0.0291212
P42658	DPP6	-0.834537	-0.274962	0.489744	-3.1341	0.00172409	0.0291212
Q16798	ME3	-0.844546	-0.304652	0.435859	-3.12691	0.00176683	0.0291212
P83731	RPL24	-0.835857	-0.229054	0.503567	-3.12668	0.00176816	0.0291212
P40429	RPL13A	-0.843217	-0.259027	0.475323	-3.12551	0.00177526	0.0291212
P62917	RPL8	-0.846666	-0.23665	0.536107	-3.12548	0.00177539	0.0291212
Q9P121	NTM	-0.832222	-0.241351	0.453962	-3.12485	0.00177922	0.0291212
Q92974	ARHGEF2	-0.827696	-0.32507	0.457629	-3.10763	0.0018862	0.0305602
Q8N126	CADM3	-0.82525	-0.186001	0.488586	-3.09858	0.00194478	0.0310174
Q8TF44	C2CD4C	-0.81975	-0.282857	0.583441	-3.09234	0.00198612	0.0310174
O43707	ACTN4	-0.818753	-0.25812	0.440042	-3.08778	0.00201688	0.0310174
Q99490	AGAP2	-0.819413	-0.318889	0.464419	-3.08227	0.00205457	0.0310174
Q9NQC7	CYLD	-0.824522	-0.345622	0.454807	-3.08056	0.00206639	0.0310174
P60866	RPS20	-0.816638	-0.26854	0.477818	-3.07988	0.00207116	0.0310174
P62753	RPS6	-0.837366	-0.284017	0.45278	-3.07961	0.00207304	0.0310174
P62241	RPS8	-0.816159	-0.244666	0.458303	-3.07935	0.00207481	0.0310174
Q12983	BNIP3	-0.817613	-0.23057	0.49315	-3.07675	0.00209299	0.0310174
P26373	RPL13	-0.820562	-0.255458	0.483238	-3.06722	0.00216087	0.0310174
Q8WXS5	CACNG8	-0.818174	-0.284356	0.525575	-3.06701	0.00216241	0.0310174
P62701	RPS4X	-0.830476	-0.204622	0.418703	-3.06664	0.00216513	0.0310174
Q9H9H5	MAP6D1	-0.819122	-0.239916	0.448493	-3.06654	0.00216581	0.0310174
Q9C0H9	SRCIN1	-0.810407	-0.312435	0.404607	-3.05684	0.00223713	0.0314527
P02686	MBP	-0.80967	-0.205705	0.362047	-3.05466	0.00225346	0.0314527
P05204	HMGN2	-0.829099	-0.194267	0.547617	-3.05309	0.00226533	0.0314527
Q8WW22	DNAJA4	-0.824418	-0.29692	0.484447	-3.05185	0.00227464	0.0314527
P62277	RPS13	-0.808172	-0.189444	0.498485	-3.04858	0.00229956	0.0315255
P50914	RPL14	-0.805375	-0.211065	0.492249	-3.03499	0.00240577	0.0322707
P32969	RPL9	-0.808456	-0.215692	0.50158	-3.03457	0.00240915	0.0322707
Q9UJF2	RASAL2	-0.804155	-0.354913	0.433052	-3.03393	0.00241426	0.0322707
P08708	RPS17	-0.801809	-0.241026	0.485242	-3.02229	0.00250901	0.0332599
P07196	NEFL	-0.80103	-0.227644	0.346806	-3.01795	0.00254527	0.033464
P42263	GRIA3	-0.802399	-0.3167	0.491856	-3.0088	0.00262317	0.0342078
Q08495	DMTN	-0.798978	-0.29773	0.395809	-3.00463	0.0026594	0.0343159
Q9P0V9	SEPTIN10	-0.806702	-0.254661	0.347008	-3.00085	0.00269261	0.0343159
P62263	RPS14	-0.805542	-0.244404	0.517515	-3.00051	0.00269564	0.0343159
O75340	PDCD6	-0.812193	-0.247368	0.451112	-2.99694	0.00272735	0.0343509
O15394	NCAM2	-0.799342	-0.27832	0.38715	-2.9954	0.00274122	0.0343509
P23471	PTPRZ1	-0.795051	-0.229581	0.509722	-2.99233	0.00276889	0.0343751
P22748	CA4	-0.813925	-0.176929	0.582978	-2.99045	0.00278601	0.0343751
Q02878	RPL6	-0.799697	-0.235485	0.439977	-2.98741	0.00281389	0.0344541
P84098	RPL19	-0.806078	-0.256632	0.466835	-2.96863	0.00299172	0.0363539
Q16181	SEPTIN7	-0.785869	-0.283999	0.377872	-2.96375	0.00303953	0.0366572
P62829	RPL23	-0.783444	-0.265581	0.412914	-2.95586	0.00311837	0.0373273
P00338	LDHA	-0.786518	-0.284878	0.367843	-2.94935	0.00318477	0.0375621
Q96PV0	SYNGAP1	-0.787511	-0.331419	0.441939	-2.94935	0.00318482	0.0375621
P07197	NEFM	-0.780621	-0.233418	0.326694	-2.94531	0.0032267	0.0375874
P62745	RHOB	-0.782162	-0.240858	0.401062	-2.9443	0.00323724	0.0375874
O14974	PPP1R12A	-0.782926	-0.262644	0.391002	-2.94239	0.00325726	0.0375874
Q96CV9	OPTN	-0.792821	-0.336296	0.421531	-2.93426	0.00334383	0.0382277
Q07157	TJP1	-0.777422	-0.256167	0.365667	-2.93273	0.00336041	0.0382277
Q969E2	SCAMP4	-0.774913	-0.221898	0.426271	-2.92296	0.00346764	0.0391169
P62899	RPL31	-0.78682	-0.201158	0.491909	-2.92112	0.00348817	0.0391169
Q8IXJ6	SIRT2	-0.791243	-0.218983	0.355416	-2.91873	0.00351496	0.0391169
P18077	RPL35A	-0.798907	-0.255281	0.447582	-2.91596	0.00354639	0.0391169
P53667	LIMK1	-0.785158	-0.318023	0.415021	-2.91472	0.00356052	0.0391169
Q5SSJ5	HP1BP3	-0.777409	-0.254034	0.407207	-2.90344	0.00369126	0.0402774
Q5SQI0	ATAT1	-0.7773	-0.290503	0.41715	-2.90111	0.00371888	0.0403046
P55290	CDH13	-0.769981	-0.219441	0.439616	-2.8988	0.00374641	0.0403305
Q9UHG3	PCYOX1	-0.771829	-0.21798	0.359514	-2.89245	0.00382298	0.0405386
O60716	CTNND1	-0.777982	-0.302659	0.461073	-2.89237	0.00382388	0.0405386
Q9UPQ0	LIMCH1	-0.779423	-0.274937	0.380423	-2.89092	0.00384157	0.0405386
O14523	C2CD2L	-0.776429	-0.301528	0.43279	-2.88502	0.00391437	0.0410369
Q5T442	GJC2	-0.763703	-0.24208	0.395116	-2.88113	0.00396302	0.0412771
P50395	GDI2	-0.768462	-0.238125	0.298564	-2.87707	0.00401436	0.0415421
Q96PU5	NEDD4L	-0.778526	-0.342576	0.425945	-2.87068	0.00409631	0.0419864
Q9BW30	TPPP3	-0.779147	-0.24318	0.344561	-2.86966	0.00410965	0.0419864
Q9UQN3	CHMP2B	-0.772751	-0.253387	0.427974	-2.86309	0.00419575	0.0420893
Q9Y217	MTMR6	-0.75793	-0.276715	0.403668	-2.85944	0.00424439	0.0420893
Q15019	SEPTIN2	-0.756732	-0.210391	0.316934	-2.85501	0.00430404	0.0420893
P62316	SNRPD2	0.763581	0.057944	-0.791472	2.85259	0.00433692	0.0420893
Q12955	ANK3	-0.765331	-0.291904	0.388078	-2.85231	0.00434069	0.0420893
P05026	ATP1B1	-0.758331	-0.200447	0.411619	-2.85229	0.00434104	0.0420893
Q12860	CNTN1	-0.7651	-0.238113	0.424029	-2.85209	0.00434374	0.0420893
Q9BRQ6	CHCHD6	-0.760524	-0.218081	0.457789	-2.85067	0.00436319	0.0420893
P46782	RPS5	-0.76972	-0.233419	0.424981	-2.85038	0.00436719	0.0420893
P00505	GOT2	-0.767019	-0.279598	0.337266	-2.84929	0.00438212	0.0420893
Q9ULJ8	PPP1R9A	-0.756641	-0.300026	0.380898	-2.84576	0.004431	0.0422312
P39019	RPS19	-0.760687	-0.187734	0.451804	-2.84274	0.00447322	0.0422312
P02511	CRYAB	-0.752895	-0.173311	0.323705	-2.84052	0.00450449	0.0422312
Q14697	GANAB	0.754235	0.135812	-0.741907	2.83901	0.00452591	0.0422312
Q96HS1	PGAM5	-0.770343	-0.298343	0.433478	-2.83882	0.00452853	0.0422312
P21589	NT5E	-0.765311	-0.236054	0.451001	-2.83625	0.00456521	0.0423271
P30086	PEBP1	-0.753504	-0.206819	0.345662	-2.8262	0.00471093	0.0430915
P05129	PRKCG	-0.748602	-0.338063	0.410176	-2.82249	0.00476579	0.0430915
Q96RR4	CAMKK2	-0.748061	-0.302042	0.433243	-2.82247	0.00476604	0.0430915
P62249	RPS16	-0.755727	-0.218963	0.426651	-2.82092	0.00478906	0.0430915
Q9H7D7	WDR26	-0.748032	-0.305818	0.399083	-2.81924	0.0048142	0.0430915
P30041	PRDX6	-0.751377	-0.213858	0.375396	-2.81824	0.00482931	0.0430915
Q9UEW8	STK39	-0.749038	-0.315191	0.380336	-2.81781	0.0048357	0.0430915
Q969L2	MAL2	-0.753756	-0.261775	0.337753	-2.81157	0.00493052	0.0432075
O95057	DIRAS1	-0.74624	-0.236659	0.435109	-2.8101	0.00495311	0.0432075
Q92686	NRGN	-0.76478	-0.296157	0.439682	-2.80933	0.00496499	0.0432075
Q8TDC3	BRSK1	-0.75143	-0.352529	0.407178	-2.80698	0.00500141	0.0432075
P27635	RPL10	-0.766129	-0.286458	0.445212	-2.80657	0.00500768	0.0432075
Q00765	REEP5	-0.758868	-0.152795	0.454764	-2.80475	0.00503603	0.0432075
Q969P0	IGSF8	-0.748103	-0.253075	0.408334	-2.80467	0.00503728	0.0432075
Q99497	PARK7	-0.744539	-0.212829	0.304375	-2.79869	0.0051315	0.0437815
P46379	BAG6	-0.744466	-0.308507	0.354272	-2.79409	0.00520519	0.0441753
Q9Y6K8	AK5	-0.73934	-0.305705	0.3962	-2.78721	0.00531687	0.0448856
P28066	PSMA5	-0.755504	-0.248201	0.415625	-2.78482	0.00535629	0.044979
P63096	GNAI1	-0.753324	-0.245612	0.359015	-2.78314	0.00538402	0.044979
Q14982	OPCML	-0.750485	-0.225061	0.419976	-2.77898	0.00545352	0.0451479
Q9BV35	SLC25A23	-0.762162	-0.286923	0.459651	-2.7775	0.00547838	0.0451479
Q9UQB8	BAIAP2	-0.738351	-0.301512	0.387745	-2.77689	0.00548868	0.0451479
Q16891	IMMT	-0.73677	-0.264683	0.410193	-2.77282	0.0055579	0.0453636
Q8N1I0	DOCK4	-0.75473	-0.323027	0.456716	-2.77202	0.00557146	0.0453636
Q6U841	SLC4A10	-0.735191	-0.292381	0.433494	-2.76945	0.00561556	0.0454917
P13637	ATP1A3	-0.734852	-0.258007	0.371834	-2.76447	0.00570213	0.0459609
Q8IU85	CAMK1D	-0.73363	-0.295517	0.377683	-2.75876	0.00580266	0.0465374
P11277	SPTB	-0.729879	-0.328912	0.429067	-2.75391	0.0058893	0.0469972
P23515	OMG	-0.733196	-0.199674	0.371235	-2.75218	0.00592061	0.0470131
Q6UWR7	ENPP6	-0.742883	-0.206656	0.307858	-2.75021	0.00595623	0.047063
Q96PY5	FMNL2	-0.734222	-0.232097	0.313839	-2.74771	0.00600189	0.0471913
Q9HBF4	ZFYVE1	-0.748005	-0.290851	0.408972	-2.74311	0.00608657	0.0476237
Q8IV01	SYT12	-0.742318	-0.28949	0.455265	-2.73493	0.00623997	0.0485553
P05386	RPLP1	-0.738213	-0.227929	0.308301	-2.73355	0.00626618	0.0485553
Q92599	SEPTIN8	-0.737026	-0.268404	0.32114	-2.73045	0.00632541	0.0486407
P05387	RPLP2	-0.740827	-0.20327	0.401934	-2.72902	0.00635279	0.0486407
Q9P1A6	DLGAP2	-0.735018	-0.318511	0.415484	-2.72823	0.00636817	0.0486407
Q92556	ELMO1	-0.723198	-0.287336	0.354427	-2.7234	0.00646203	0.0490436
Q9H4G4	GLIPR2	-0.727623	-0.229199	0.276173	-2.72098	0.00650952	0.0490436
O94772	LY6H	-0.741862	-0.211565	0.359867	-2.71941	0.00654053	0.0490436
Q27J81	INF2	-0.738511	-0.261836	0.365178	-2.71927	0.00654322	0.0490436
Q92522	H1-10	-0.732126	-0.199288	0.416656	-2.71257	0.00667704	0.0490667
P02533	KRT14	-0.731217	-0.266153	0.48873	-2.71242	0.00667996	0.0490667
Q9Y2J0	RPH3A	-0.732008	-0.268273	0.448528	-2.71231	0.00668215	0.0490667
Q08554	DSC1	-0.719284	-0.227081	0.517128	-2.70965	0.00673601	0.0490667
P78352	DLG4	-0.719202	-0.291553	0.389444	-2.70877	0.006754	0.0490667
Q9P0L0	VAPA	-0.720487	-0.27689	0.317083	-2.70815	0.00676657	0.0490667
O60762	DPM1	-0.721397	-0.247264	0.434457	-2.70757	0.00677836	0.0490667
P18621	RPL17	-0.727409	-0.230429	0.445496	-2.70695	0.00679103	0.0490667
Q7Z406	MYH14	-0.719273	-0.283797	0.366277	-2.70442	0.00684304	0.0491225
Q13011	ECH1	-0.721943	-0.233341	0.372273	-2.70218	0.00688933	0.0491225
P57737	CORO7	-0.716741	-0.29707	0.354781	-2.70211	0.00689063	0.0491225
P78357	CNTNAP1	-0.715996	-0.269616	0.331902	-2.70053	0.00692344	0.0491311
Q7L0J3	SV2A	-0.717561	-0.261818	0.326427	-2.69911	0.00695309	0.0491311
Q9NVA2	SEPTIN11	-0.714704	-0.26766	0.370753	-2.69542	0.00703065	0.0491725
P09543	CNP	-0.714695	-0.231823	0.266369	-2.69375	0.00706586	0.0491725
Q9UI40	SLC24A2	-0.722721	-0.207608	0.331321	-2.69343	0.00707273	0.0491725
Q96B97	SH3KBP1	-0.725405	-0.240691	0.432967	-2.69301	0.00708158	0.0491725
P05091	ALDH2	-0.713407	-0.252494	0.278386	-2.69014	0.00714282	0.0491835
P60201	PLP1	-0.713528	-0.223489	0.240596	-2.69006	0.00714449	0.0491835
O14773	TPP1	-0.71093	-0.290388	0.270663	-2.67828	0.00740073	0.0507298
Q9H329	EPB41L4B	-0.712491	-0.299494	0.458166	-2.6663	0.00766979	0.0519267
P20916	MAG	-0.706539	-0.203743	0.29104	-2.66584	0.00768029	0.0519267
P62280	RPS11	-0.715388	-0.236682	0.372904	-2.66562	0.00768519	0.0519267
Q9GZY8	MFF	-0.708464	-0.236816	0.431355	-2.66477	0.00770484	0.0519267
P51649	ALDH5A1	-0.706657	-0.2884	0.354146	-2.65521	0.00792658	0.053
Q8N2F6	ARMC10	-0.71226	-0.273449	0.384243	-2.6518	0.00800711	0.053
P06744	GPI	0.702691	0.11979	-0.706851	2.65117	0.00802198	0.053
P08133	ANXA6	-0.703478	-0.254419	0.270593	-2.65103	0.00802536	0.053
Q9UHQ9	CYB5R1	-0.711606	-0.275909	0.376056	-2.65086	0.00802931	0.053
P13798	APEH	-0.701801	-0.176055	0.360786	-2.64803	0.00809696	0.0530313
Q8N9I9	DTX3	-0.71145	-0.333716	0.384398	-2.64789	0.00810017	0.0530313
P48729	CSNK1A1	-0.707833	-0.226524	0.41472	-2.64405	0.00819285	0.0533606
Q8N9N7	LRRC57	-0.714684	-0.261258	0.295975	-2.64023	0.00828567	0.0533606
P11169	SLC2A3	-0.701688	-0.209172	0.433203	-2.64008	0.0082892	0.0533606
P02794	FTH1	-0.701447	-0.250473	0.256844	-2.63943	0.00830527	0.0533606
O43617	TRAPPC3	-0.712085	-0.258958	0.398984	-2.63896	0.0083168	0.0533606
Q12933	TRAF2	-0.708723	-0.250306	0.333907	-2.62744	0.00860378	0.0549819
Q02246	CNTN2	-0.698991	-0.200397	0.33637	-2.62184	0.00874635	0.0555116
O15083	ERC2	-0.698802	-0.263117	0.403521	-2.62147	0.00875588	0.0555116
P62857	RPS28	-0.70969	-0.221152	0.404367	-2.61939	0.00880941	0.0556311
O95747	OXSR1	-0.693226	-0.280192	0.356939	-2.61547	0.00891119	0.0558847
Q13449	LSAMP	-0.700621	-0.186535	0.384682	-2.61516	0.00891925	0.0558847
Q13303	KCNAB2	-0.693977	-0.223314	0.348642	-2.6137	0.00895735	0.055905
P28072	PSMB6	-0.694974	-0.210644	0.332237	-2.60916	0.0090771	0.0562318
P04264	KRT1	-0.691498	-0.25066	0.464823	-2.60906	0.00907982	0.0562318
Q9NUQ2	AGPAT5	-0.693091	-0.265551	0.365399	-2.60687	0.00913806	0.0562963
Q9P0M9	MRPL27	-0.692489	-0.204772	0.444233	-2.60603	0.00916043	0.0562963
Q53GQ0	HSD17B12	-0.696517	-0.243849	0.356889	-2.60467	0.009197	0.0563053
Q9UL25	RAB21	-0.69248	-0.264621	0.336282	-2.59514	0.00945595	0.0576705
Q7Z6G8	ANKS1B	-0.688456	-0.299278	0.370316	-2.59346	0.00950218	0.057733
Q7Z3B1	NEGR1	-0.690282	-0.239578	0.391407	-2.59043	0.00958645	0.0579953
Q5VUB5	FAM171A1	-0.692337	-0.287225	0.330965	-2.58931	0.00961768	0.0579953
P23396	RPS3	-0.685089	-0.208274	0.383148	-2.58451	0.00975262	0.0585887
Q02156	PRKCE	-0.688635	-0.315769	0.372137	-2.58147	0.00983876	0.0587809
O43301	HSPA12A	-0.687204	-0.274331	0.338019	-2.5808	0.0098579	0.0587809
Q86YZ3	HRNR	-0.692037	-0.234514	0.434977	-2.57753	0.00995177	0.0591209
Q9HAV7	GRPEL1	0.687399	0.109198	-0.690907	2.57582	0.0100011	0.0591948
P82663	MRPS25	-0.694556	-0.291496	0.383118	-2.56635	0.0102783	0.0604429
P61247	RPS3A	-0.690819	-0.204117	0.379492	-2.56372	0.0103565	0.0604429
Q9Y4F5	CEP170B	-0.682678	-0.29846	0.403294	-2.56361	0.0103599	0.0604429
P16389	KCNA2	-0.679486	-0.248699	0.31682	-2.56351	0.0103627	0.0604429
P62937	PPIA	0.678421	0.146224	-0.669827	2.55613	0.0105851	0.0611666
P54619	PRKAG1	-0.69287	-0.28465	0.33656	-2.55601	0.0105888	0.0611666
Q13492	PICALM	-0.683055	-0.252553	0.271215	-2.5556	0.0106012	0.0611666
Q7L099	RUFY3	-0.683019	-0.276753	0.310239	-2.55435	0.0106395	0.0611675
P25686	DNAJB2	-0.67627	-0.219653	0.355067	-2.54698	0.0108667	0.0622509
O75521	ECI2	-0.685584	-0.273414	0.354116	-2.54284	0.0109965	0.06277
P13647	KRT5	-0.673847	-0.255956	0.455782	-2.54122	0.0110473	0.0627757
P35527	KRT9	-0.679577	-0.253495	0.438628	-2.54032	0.0110758	0.0627757
O15066	KIF3B	-0.690149	-0.185338	0.413356	-2.53815	0.0111447	0.062944
Q8NCB2	CAMKV	-0.673554	-0.291906	0.376411	-2.533	0.0113098	0.0636525
P46821	MAP1B	-0.672575	-0.257263	0.323892	-2.52989	0.0114108	0.0638174
Q00688	FKBP3	-0.67218	-0.220182	0.322061	-2.52964	0.0114187	0.0638174
Q9Y512	SAMM50	-0.677947	-0.250936	0.365383	-2.52782	0.0114781	0.0638719
Q06830	PRDX1	-0.6696	-0.223599	0.289577	-2.52659	0.0115183	0.0638719
O15075	DCLK1	-0.676467	-0.276992	0.345465	-2.52569	0.0115479	0.0638719
Q13557	CAMK2D	-0.66918	-0.310515	0.361894	-2.52404	0.0116022	0.0639285
P63220	RPS21	-0.684044	-0.195816	0.381379	-2.52296	0.0116378	0.0639285
Q9H492	MAP1LC3A	-0.676288	-0.217701	0.383921	-2.51356	0.0119526	0.0654336
P12036	NEFH	-0.673247	-0.202451	0.246407	-2.51154	0.0120213	0.065552
Q6P1Q0	LETMD1	-0.684627	-0.266567	0.364759	-2.51052	0.012056	0.065552
P09936	UCHL1	0.669556	0.121936	-0.676344	2.50424	0.0122722	0.066502
P10412	H1-4	-0.665577	-0.183472	0.319275	-2.5012	0.0123781	0.0665384
P10114	RAP2A	-0.662563	-0.225898	0.4319	-2.49989	0.0124241	0.0665384
Q9HA65	TBC1D17	-0.665887	-0.323787	0.296226	-2.49949	0.012438	0.0665384
Q9Y4P3	TBL2	-0.664243	-0.276031	0.355467	-2.4993	0.0124448	0.0665384
Q96P47	AGAP3	-0.675278	-0.274406	0.37931	-2.49651	0.0125429	0.0666326
P63000	RAC1	-0.677257	-0.229315	0.263001	-2.49644	0.0125455	0.0666326
Q99816	TSG101	-0.672356	-0.231933	0.3502	-2.49427	0.0126226	0.0668206
Q92752	TNR	-0.662987	-0.204569	0.366937	-2.49176	0.0127122	0.0669989
P49207	RPL34	-0.67309	-0.232525	0.344509	-2.49098	0.0127398	0.0669989
Q9UDY4	DNAJB4	-0.673187	-0.26567	0.363751	-2.48733	0.0128713	0.0674102
O75508	CLDN11	-0.663917	-0.188995	0.243229	-2.48648	0.0129021	0.0674102
Q14318	FKBP8	-0.65903	-0.277526	0.371408	-2.48404	0.0129911	0.0676548
Q8N414	PGBD5	-0.658274	-0.274553	0.358858	-2.47788	0.0132172	0.0684079
P67936	TPM4	-0.669133	-0.209244	0.385703	-2.47762	0.0132271	0.0684079
A6ZKI3	RTL8C	-0.660915	-0.183112	0.355232	-2.47663	0.0132636	0.0684079
Q4V328	GRIPAP1	-0.658091	-0.305344	0.378932	-2.47144	0.013458	0.0689826
O14979	HNRNPDL	0.659035	0.07323	-0.70858	2.47081	0.0134815	0.0689826
Q9H6K4	OPA3	-0.654613	-0.252063	0.262409	-2.46914	0.0135446	0.0689826
Q14642	INPP5A	-0.676234	-0.229266	0.352357	-2.46908	0.0135471	0.0689826
Q16653	MOG	-0.657875	-0.211334	0.232326	-2.46525	0.0136925	0.0694875
Q5D862	FLG2	-0.658468	-0.264708	0.409837	-2.4642	0.0137329	0.0694875
P78559	MAP1A	-0.653473	-0.24539	0.270069	-2.45719	0.0140038	0.0702725
P05771	PRKCB	-0.661732	-0.298057	0.328597	-2.45717	0.0140044	0.0702725
Q96HU8	DIRAS2	-0.653408	-0.233235	0.288744	-2.45549	0.0140703	0.0702725
P14618	PKM	-0.65064	-0.255276	0.288598	-2.45383	0.0141354	0.0702725
P84095	RHOG	-0.650379	-0.20467	0.23467	-2.45383	0.0141354	0.0702725
P62750	RPL23A	-0.659129	-0.14958	0.452371	-2.45343	0.0141509	0.0702725
Q92529	SHC3	-0.65356	-0.297874	0.333371	-2.4452	0.0144782	0.0716758
Q17R89	ARHGAP44	-0.663947	-0.294967	0.353982	-2.43797	0.0147711	0.072901
O75077	ADAM23	-0.646113	-0.206373	0.338868	-2.43676	0.0148204	0.0729201
Q6UWE0	LRSAM1	-0.645841	-0.257398	0.302137	-2.43541	0.014876	0.0729697
O43236	SEPTIN4	-0.647566	-0.253913	0.231386	-2.43387	0.0149392	0.0729778
O75431	MTX2	-0.666131	-0.254062	0.323992	-2.43316	0.0149686	0.0729778
P55196	AFDN	-0.661649	-0.254769	0.28982	-2.42709	0.0152216	0.0732901
Q96E17	RAB3C	0.644205	0.0845383	-0.599003	2.42604	0.0152656	0.0732901
P23677	ITPKA	-0.644828	-0.309977	0.312378	-2.42515	0.015303	0.0732901
P11274	BCR	-0.6535	-0.317589	0.312269	-2.42341	0.0153765	0.0732901
Q9UQM7	CAMK2A	-0.64656	-0.298568	0.331877	-2.42247	0.0154162	0.0732901
Q9BZF1	OSBPL8	-0.64559	-0.281057	0.342199	-2.42246	0.0154166	0.0732901
Q96BQ5	CCDC127	-0.654268	-0.210907	0.311957	-2.42231	0.0154229	0.0732901
P07093	SERPINE2	-0.656276	-0.177993	0.423179	-2.42229	0.0154239	0.0732901
Q00839	HNRNPU	-0.641968	-0.253913	0.312047	-2.42182	0.0154439	0.0732901
O60861	GAS7	-0.668676	-0.299024	0.285219	-2.41901	0.0155637	0.0734509
Q5VWJ9	SNX30	-0.643954	-0.282923	0.336287	-2.41888	0.0155694	0.0734509
P05141	SLC25A5	-0.655965	-0.231197	0.36183	-2.41691	0.0156537	0.0735595
Q5JU85	IQSEC2	-0.642526	-0.311006	0.339905	-2.41606	0.0156905	0.0735595
P07305	H1-0	-0.639873	-0.174139	0.343911	-2.41365	0.0157945	0.0735595
O14950	MYL12B	-0.654677	-0.212105	0.341832	-2.41356	0.0157985	0.0735595
Q14012	CAMK1	-0.6587	-0.28869	0.341626	-2.41278	0.0158324	0.0735595
P62906	RPL10A	-0.654048	-0.214976	0.357985	-2.4116	0.0158837	0.0735595
Q13505	MTX1	-0.644221	-0.228214	0.285782	-2.40889	0.0160021	0.0735595
P51149	RAB7A	-0.640566	-0.199409	0.273159	-2.40875	0.0160081	0.0735595
Q86UR5	RIMS1	-0.640086	-0.301861	0.360049	-2.40837	0.016025	0.0735595
Q9H2M9	RAB3GAP2	-0.643217	-0.299557	0.325951	-2.40726	0.0160736	0.0735595
P60660	MYL6	-0.653327	-0.250343	0.324443	-2.40673	0.0160969	0.0735595
P45974	USP5	-0.644174	-0.291575	0.307799	-2.40546	0.0161531	0.073607
Q9UPA5	BSN	-0.638477	-0.296055	0.347394	-2.40117	0.0163438	0.0742648
Q07002	CDK18	-0.638041	-0.276336	0.294984	-2.39626	0.0165643	0.0750538
P46976	GYG1	-0.647453	-0.164954	0.353764	-2.39412	0.0166611	0.0752801
P07384	CAPN1	-0.644549	-0.282761	0.297182	-2.38897	0.0168968	0.075433
P20073	ANXA7	-0.633561	-0.219349	0.182821	-2.38888	0.0169008	0.075433
P61353	RPL27	-0.644924	-0.202252	0.387623	-2.38761	0.0169592	0.075433
P46777	RPL5	-0.644073	-0.204644	0.388251	-2.38684	0.0169949	0.075433
Q96A35	MRPL24	-0.634388	-0.273827	0.35057	-2.386	0.0170339	0.075433
Q9Y2Z4	YARS2	-0.645824	-0.29383	0.324296	-2.38552	0.0170558	0.075433
Q9Y2C4	EXOG	-0.656505	-0.256253	0.284604	-2.38514	0.0170736	0.075433
P02689	PMP2	-0.631948	-0.168901	0.20241	-2.38458	0.0170995	0.075433
O95886	DLGAP3	-0.632908	-0.3025	0.347642	-2.38418	0.0171182	0.075433
Q7KZI7	MARK2	-0.636792	-0.27991	0.316144	-2.38226	0.0172075	0.0756189
P12235	SLC25A4	-0.64732	-0.266537	0.331243	-2.37632	0.017487	0.0765205
Q8TF61	FBXO41	-0.630692	-0.296529	0.361238	-2.37498	0.0175508	0.0765205
P42224	STAT1	-0.643756	-0.281696	0.320583	-2.37418	0.0175888	0.0765205
P61626	LYZ	-0.64032	-0.190925	0.359082	-2.37368	0.0176127	0.0765205
Q96QG7	MTMR9	-0.638853	-0.263695	0.337847	-2.37287	0.0176512	0.0765205
O75334	PPFIA2	-0.635022	-0.307674	0.360481	-2.36846	0.0178631	0.0772301
Q8WU79	SMAP2	-0.631439	-0.263709	0.27564	-2.3654	0.0180115	0.077455
P08865	RPSA	-0.627028	-0.166204	0.365792	-2.36528	0.0180175	0.077455
P11233	RALA	-0.642311	-0.203744	0.268366	-2.36441	0.01806	0.077455
Q53H12	AGK	-0.628531	-0.232838	0.393835	-2.36213	0.0181715	0.0777254
P10599	TXN	-0.637212	-0.228606	0.437285	-2.3564	0.0184542	0.078725
Q9Y6T7	DGKB	-0.627873	-0.248156	0.357844	-2.35341	0.018603	0.079149
P00568	AK1	0.623635	0.110882	-0.665806	2.35057	0.0187459	0.0794632
Q8N5N7	MRPL50	-0.623475	-0.215758	0.348633	-2.34997	0.0187759	0.0794632
Q6DN14	MCTP1	-0.63758	-0.315106	0.31731	-2.34744	0.018904	0.0796702
P54829	PTPN5	-0.63951	-0.279075	0.360055	-2.34704	0.0189242	0.0796702
O75190	DNAJB6	-0.622406	-0.167852	0.351509	-2.3438	0.0190893	0.080155
P62760	VSNL1	-0.623788	-0.195043	0.263978	-2.34225	0.0191687	0.0802781
Q6PKG0	LARP1	-0.637188	-0.266601	0.306984	-2.34085	0.0192412	0.0803719
Q6ZVL6	KIAA1549L	-0.633651	-0.239514	0.377907	-2.33772	0.0194028	0.0806659
P55809	OXCT1	0.622126	0.0470765	-0.658031	2.33754	0.0194121	0.0806659
P09496	CLTA	0.619485	0.0928801	-0.561933	2.33607	0.0194889	0.080739
O75899	GABBR2	-0.629811	-0.245454	0.363051	-2.33504	0.0195425	0.080739
P10809	HSPD1	-0.621771	-0.19233	0.318629	-2.33431	0.0195807	0.080739
Q8WUH2	TGFBRAP1	-0.624815	-0.291389	0.324694	-2.32625	0.0200063	0.0822825
P35908	KRT2	-0.617589	-0.260854	0.362116	-2.32475	0.0200863	0.0824
P06753	TPM3	-0.619028	-0.197136	0.348933	-2.31896	0.0203982	0.0834555
Q9GZS3	WDR61	-0.620892	-0.23151	0.308881	-2.31805	0.0204476	0.0834555
O95831	AIFM1	-0.613779	-0.237442	0.283151	-2.3157	0.0205756	0.0836566
Q8NBX0	SCCPDH	-0.613618	-0.230125	0.332441	-2.31523	0.0206012	0.0836566
Q16698	DECR1	-0.616337	-0.208401	0.321602	-2.30928	0.0209293	0.0847742
O60884	DNAJA2	-0.625559	-0.200677	0.363069	-2.30608	0.0211071	0.0852792
Q9P0J7	KCMF1	-0.620906	-0.205748	0.248105	-2.30264	0.0213	0.0856483
P49815	TSC2	-0.621621	-0.28516	0.340676	-2.30255	0.0213053	0.0856483
Q9NX63	CHCHD3	-0.609882	-0.205984	0.337981	-2.3001	0.0214437	0.0859893
P07355	ANXA2	-0.608836	-0.17171	0.417618	-2.29472	0.0217501	0.0870004
P13645	KRT10	-0.60863	-0.248002	0.40745	-2.2922	0.0218953	0.0873633
P61026	RAB10	-0.620582	-0.197976	0.319859	-2.29098	0.0219656	0.0874265
Q5T5P2	KIAA1217	-0.608642	-0.239943	0.32496	-2.29	0.0220225	0.0874319
Q9Y5S2	CDC42BPB	-0.615495	-0.291882	0.332768	-2.28908	0.022076	0.0874319
Q9UDT6	CLIP2	-0.612052	-0.25992	0.26038	-2.28793	0.0221428	0.0874806
Q15555	MAPRE2	-0.607407	-0.239393	0.287098	-2.28601	0.0222547	0.0877067
P04179	SOD2	-0.608019	-0.208027	0.245567	-2.2808	0.0225616	0.0886979
Q5FWE3	PRRT3	-0.610796	-0.281964	0.237763	-2.27916	0.0226584	0.0888607
Q9H254	SPTBN4	-0.604547	-0.268204	0.281428	-2.27732	0.0227683	0.0890739
Q15477	SKIV2L	-0.609113	-0.295289	0.33037	-2.27577	0.0228609	0.0892188
Q8N608	DPP10	-0.604278	-0.235178	0.326076	-2.27354	0.0229946	0.0895225
P30101	PDIA3	0.601842	0.119118	-0.629952	2.26874	0.0232855	0.0903242
Q9UMS0	NFU1	0.606211	0.0728929	-0.61343	2.26828	0.0233131	0.0903242
O60313	OPA1	-0.600862	-0.23874	0.329975	-2.26606	0.0234491	0.0906321
Q9NPD7	NRN1	-0.599295	-0.197749	0.318571	-2.25937	0.0238615	0.0919226
P60953	CDC42	-0.598497	-0.184789	0.215294	-2.2582	0.0239343	0.0919226
Q15257	PTPA	0.603255	0.131214	-0.54279	2.2574	0.0239842	0.0919226
Q9NP79	VTA1	0.606831	0.0726201	-0.638232	2.25695	0.0240122	0.0919226
Q15773	MLF2	-0.601968	-0.20958	0.328391	-2.25505	0.0241315	0.0921594
P10586	PTPRF	-0.5974	-0.247101	0.299874	-2.25358	0.0242238	0.0922165
P61020	RAB5B	-0.597172	-0.199964	0.311456	-2.25239	0.0242985	0.0922165
Q9Y484	WDR45	-0.616878	-0.235807	0.318476	-2.25207	0.0243189	0.0922165
P37235	HPCAL1	-0.60441	-0.207941	0.281357	-2.24532	0.0247484	0.0936164
P11137	MAP2	-0.596816	-0.258727	0.225891	-2.24421	0.02482	0.0936164
P52943	CRIP2	-0.599193	-0.241367	0.305046	-2.24354	0.0248632	0.0936164
O00401	WASL	-0.596146	-0.268087	0.311997	-2.24065	0.0250501	0.0940993
Q8NBU5	ATAD1	-0.595753	-0.258756	0.327901	-2.23592	0.0253583	0.0948229
Q9C0H5	ARHGAP39	-0.600161	-0.279078	0.367056	-2.23588	0.025361	0.0948229
Q6NTF9	RHBDD2	-0.604528	-0.310375	0.300416	-2.23329	0.0255311	0.0952371
P52907	CAPZA1	-0.609529	-0.201209	0.264041	-2.22744	0.0259191	0.0962485
P35580	MYH10	-0.594286	-0.273353	0.314312	-2.22733	0.0259266	0.0962485
P02792	FTL	-0.590391	-0.2438	0.164675	-2.22641	0.0259882	0.0962485
O96008	TOMM40	-0.5912	-0.247274	0.272789	-2.2256	0.0260423	0.0962485
P11142	HSPA8	-0.589535	-0.210741	0.193126	-2.22273	0.026235	0.0967378
Q9BRK0	REEP2	-0.588476	-0.126715	0.375621	-2.22045	0.0263891	0.0970829
Q96JJ7	TMX3	0.595309	0.104423	-0.578211	2.21933	0.0264656	0.0971416
Q00059	TFAM	-0.591563	-0.214287	0.346573	-2.21481	0.0267742	0.0980498
Q8N9F0	NAT8L	-0.598787	-0.268662	0.30114	-2.21371	0.02685	0.0981036
P49411	TUFM	-0.587911	-0.278901	0.290187	-2.20708	0.0273098	0.0995566
P27361	MAPK3	0.584934	0.0878922	-0.65448	2.20599	0.0273861	0.0995909
Q9UQB3	CTNND2	-0.589526	-0.273525	0.278263	-2.2046	0.0274833	0.0995909
P25789	PSMA4	-0.607019	-0.203583	0.280532	-2.20429	0.0275055	0.0995909
Q02978	SLC25A11	-0.59007	-0.170098	0.375552	-2.20171	0.0276871	0.100023
O14994	SYN3	-0.58705	-0.212202	0.333326	-2.19856	0.0279107	0.10005
Q02790	FKBP4	0.585451	0.125935	-0.60918	2.19847	0.027917	0.10005
P40123	CAP2	-0.59123	-0.201967	0.318999	-2.19808	0.0279445	0.10005
Q9UHD8	SEPTIN9	-0.584054	-0.268793	0.225182	-2.19804	0.0279477	0.10005
Q8WXD9	CASKIN1	-0.583873	-0.275478	0.332304	-2.19721	0.0280066	0.10005
Q92499	DDX1	-0.588058	-0.231029	0.234299	-2.19546	0.0281315	0.100273
Q8N5V2	NGEF	-0.587344	-0.273553	0.37631	-2.19304	0.0283057	0.10067
O43581	SYT7	-0.583267	-0.21906	0.308516	-2.19089	0.0284608	0.100998
Q5T2T1	MPP7	-0.582452	-0.182719	0.277065	-2.1862	0.0288024	0.101985
P05090	APOD	-0.580047	-0.214653	0.213246	-2.1823	0.0290889	0.102772
Q15286	RAB35	-0.581611	-0.196148	0.25891	-2.18068	0.0292081	0.102967
Q8N3R9	PALS1	-0.58308	-0.249509	0.25435	-2.17941	0.0293027	0.103074
P35579	MYH9	-0.581662	-0.280007	0.299226	-2.17812	0.029398	0.103182
P30043	BLVRB	0.582321	0.0912534	-0.574316	2.16547	0.0303528	0.106301
Q6VY07	PACS1	-0.574432	-0.238248	0.338475	-2.16403	0.0304631	0.106455
P51452	DUSP3	0.574341	0.0689486	-0.618965	2.16198	0.0306213	0.106775
P15531	NME1	-0.580951	-0.205113	0.243609	-2.15923	0.0308332	0.10699
P35222	CTNNB1	-0.57318	-0.234808	0.246114	-2.1587	0.0308749	0.10699
Q8IWQ3	BRSK2	-0.579834	-0.26695	0.256441	-2.15859	0.030883	0.10699
Q86VP6	CAND1	-0.572459	-0.229113	0.311079	-2.15704	0.0310037	0.107177
O15484	CAPN5	-0.571659	-0.248187	0.318956	-2.15618	0.0310709	0.107178
P06748	NPM1	-0.573151	-0.21842	0.245562	-2.15532	0.0311378	0.107178
Q9NVH1	DNAJC11	-0.575658	-0.228043	0.280111	-2.15246	0.0313627	0.107657
P22314	UBA1	0.571095	0.0827078	-0.641384	2.15184	0.0314111	0.107657
P17677	GAP43	-0.581435	-0.213988	0.299993	-2.14845	0.0316793	0.108344
Q13813	SPTAN1	-0.568424	-0.237675	0.209579	-2.14419	0.0320191	0.109274
P14625	HSP90B1	0.574102	0.138274	-0.546007	2.14284	0.0321271	0.109409
Q5XKP0	MICOS13	-0.575524	-0.228047	0.271284	-2.14105	0.0322709	0.109481
P82909	MRPS36	-0.568862	-0.179487	0.331941	-2.14088	0.0322846	0.109481
Q8N766	EMC1	-0.567823	-0.19312	0.304707	-2.13948	0.0323982	0.109635
Q15382	RHEB	-0.570112	-0.161549	0.328023	-2.13857	0.0324715	0.109651
Q9Y224	RTRAF	-0.579901	-0.205476	0.207563	-2.13698	0.0326012	0.109858
P04216	THY1	-0.578707	-0.206721	0.235811	-2.13552	0.0327199	0.110027
Q6P9B6	MEAK7	-0.574605	-0.211828	0.299034	-2.13014	0.0331613	0.111017
P45880	VDAC2	-0.568912	-0.232565	0.250929	-2.12947	0.0332166	0.111017
Q6UXV4	APOOL	-0.56676	-0.24587	0.292588	-2.1294	0.0332221	0.111017
O15269	SPTLC1	-0.576876	-0.22733	0.243783	-2.12633	0.0334769	0.111559
P25398	RPS12	-0.564124	-0.216878	0.244782	-2.12505	0.0335838	0.111559
Q15233	NONO	-0.567301	-0.230495	0.242612	-2.12494	0.0335929	0.111559
P35240	NF2	-0.563182	-0.206221	0.225962	-2.12397	0.0336738	0.111596
Q14C86	GAPVD1	-0.569483	-0.242918	0.287821	-2.1225	0.0337969	0.111774
Q8NFX7	STXBP6	-0.562274	-0.244595	0.201745	-2.12051	0.0339641	0.112095
O60493	SNX3	-0.563245	-0.202922	0.277995	-2.11693	0.0342674	0.112864
Q9H425	C1orf198	-0.563907	-0.193361	0.179743	-2.11496	0.0344345	0.113182
Q9UPW8	UNC13A	-0.561184	-0.28107	0.335892	-2.11357	0.0345532	0.11334
Q96Q05	TRAPPC9	-0.572091	-0.297108	0.232915	-2.11268	0.0346296	0.113359
Q9NP72	RAB18	-0.563287	-0.191873	0.286379	-2.11139	0.0347399	0.113387
O15294	OGT	-0.566634	-0.294142	0.293283	-2.11039	0.0348265	0.113387
Q8NF91	SYNE1	-0.560743	-0.28545	0.278826	-2.11011	0.0348502	0.113387
P0DP25	CALM3	-0.560711	-0.151845	0.32988	-2.10893	0.0349521	0.113488
Q15070	OXA1L	-0.578828	-0.177664	0.334398	-2.10246	0.0355139	0.115079
Q8IV38	ANKMY2	-0.557911	-0.22446	0.288002	-2.09708	0.035988	0.11638
Q9HCD6	TANC2	-0.555064	-0.24578	0.341408	-2.09422	0.0362421	0.116514
Q92614	MYO18A	-0.558253	-0.264615	0.261871	-2.09333	0.0363208	0.116514
Q9NQ79	CRTAC1	-0.560223	-0.191747	0.233752	-2.09269	0.036378	0.116514
Q9H936	SLC25A22	-0.56561	-0.262316	0.29951	-2.09254	0.0363912	0.116514
P04350	TUBB4A	-0.554643	-0.263348	0.269343	-2.09253	0.0363924	0.116514
P32119	PRDX2	-0.558639	-0.216858	0.262636	-2.08912	0.0366984	0.116922
Q9H019	MTFR1L	-0.555288	-0.26416	0.223375	-2.08886	0.0367214	0.116922
Q9BPU6	DPYSL5	-0.562912	-0.222039	0.21374	-2.08867	0.0367385	0.116922
P09104	ENO2	-0.552715	-0.138284	0.251986	-2.08349	0.0372076	0.117646
Q7Z4S6	KIF21A	-0.553276	-0.262226	0.271276	-2.08319	0.0372351	0.117646
Q9NQW6	ANLN	-0.555989	-0.200254	0.160319	-2.08301	0.0372513	0.117646
Q9Y4F1	FARP1	-0.554492	-0.261886	0.306466	-2.08239	0.0373083	0.117646
Q9Y277	VDAC3	-0.562206	-0.245696	0.241616	-2.08212	0.0373328	0.117646
P14867	GABRA1	-0.55983	-0.214814	0.319573	-2.07977	0.0375478	0.118092
Q15334	LLGL1	-0.557502	-0.191865	0.260441	-2.07875	0.0376418	0.118156
P60520	GABARAPL2	-0.567679	-0.227556	0.210493	-2.07552	0.03794	0.118642
Q9Y2I8	WDR37	-0.560787	-0.270321	0.262324	-2.07546	0.0379448	0.118642
P46459	NSF	-0.548963	-0.260512	0.259831	-2.07056	0.0384016	0.119837
Q9HB21	PLEKHA1	-0.556162	-0.224841	0.263614	-2.06595	0.0388344	0.120351
Q9Y496	KIF3A	-0.547898	-0.242693	0.274951	-2.06559	0.0388687	0.120351
Q96F85	CNRIP1	0.54751	0.088629	-0.620432	2.06541	0.0388859	0.120351
Q9UPV7	PHF24	-0.553509	-0.214285	0.262062	-2.06384	0.0390342	0.120351
Q08209	PPP3CA	-0.549706	-0.212821	0.287825	-2.06329	0.039086	0.120351
Q96I99	SUCLG2	0.548497	0.0385531	-0.599277	2.06328	0.0390876	0.120351
O75880	SCO1	0.560226	0.103877	-0.652439	2.06324	0.0390916	0.120351
P18669	PGAM1	0.55752	0.0976805	-0.556018	2.06063	0.0393398	0.120883
Q6P1M0	SLC27A4	-0.549501	-0.26073	0.219823	-2.05859	0.039535	0.121251
Q9BQI5	SGIP1	-0.546337	-0.22247	0.314338	-2.05664	0.0397226	0.121593
Q9UII2	ATP5IF1	-0.549662	-0.190627	0.251392	-2.05535	0.0398466	0.121593
Q13033	STRN3	-0.557442	-0.219379	0.244733	-2.05496	0.0398838	0.121593
Q9GZV7	HAPLN2	-0.544264	-0.170003	0.155609	-2.05374	0.0400027	0.121593
P30044	PRDX5	0.553998	0.0679169	-0.600348	2.05338	0.0400372	0.121593
O14594	NCAN	-0.547295	-0.146468	0.349	-2.05259	0.0401134	0.121593
Q9P2R7	SUCLA2	0.545954	0.0270372	-0.600524	2.05124	0.0402445	0.121593
P09001	MRPL3	-0.554466	-0.231401	0.366579	-2.05116	0.0402531	0.121593
P09497	CLTB	0.542135	0.0980552	-0.507603	2.04341	0.0410131	0.123656
Q8NCA5	FAM98A	-0.546025	-0.204497	0.21793	-2.03438	0.041915	0.125917
O60268	KIAA0513	0.544796	0.0655505	-0.588033	2.03281	0.0420736	0.125917
Q9NTK5	OLA1	0.543167	0.0915577	-0.626827	2.03141	0.0422144	0.125917
P09417	QDPR	-0.545191	-0.233446	0.129247	-2.03095	0.0422618	0.125917
Q9NVI7	ATAD3A	-0.540045	-0.181787	0.275698	-2.03022	0.0423358	0.125917
Q9Y6V0	PCLO	-0.539203	-0.271319	0.294184	-2.0298	0.0423782	0.125917
P82930	MRPS34	-0.540307	-0.208386	0.26393	-2.02918	0.0424414	0.125917
Q9Y230	RUVBL2	-0.548875	-0.180323	0.310261	-2.02894	0.0424663	0.125917
P40855	PEX19	-0.546774	-0.260259	0.271409	-2.02849	0.042512	0.125917
Q9UGM6	WARS2	-0.546361	-0.197926	0.276485	-2.02813	0.0425479	0.125917
Q15700	DLG2	-0.537086	-0.243674	0.184509	-2.0254	0.0428282	0.126298
Q9NVE7	PANK4	-0.540813	-0.260996	0.242612	-2.02458	0.0429122	0.126298
P50213	IDH3A	0.537536	0.0542819	-0.499583	2.02426	0.0429445	0.126298
Q00013	MPP1	-0.54546	-0.235389	0.182934	-2.02381	0.0429916	0.126298
Q01814	ATP2B2	-0.535546	-0.186025	0.258781	-2.02011	0.0433734	0.127156
O14578	CIT	-0.536294	-0.262481	0.307322	-2.01944	0.0434424	0.127156
Q66K74	MAP1S	-0.537279	-0.276893	0.175679	-2.01749	0.0436457	0.12734
O75382	TRIM3	-0.543952	-0.265638	0.244316	-2.01732	0.0436638	0.12734
Q12959	DLG1	-0.535939	-0.231127	0.167596	-2.01622	0.0437779	0.12744
Q9NZQ3	NCKIPSD	-0.542323	-0.269943	0.27816	-2.01533	0.043872	0.127483
Q8WVD5	RNF141	-0.540145	-0.199799	0.19413	-2.01449	0.0439598	0.127507
Q14168	MPP2	-0.541979	-0.232849	0.284812	-2.01254	0.0441641	0.127581
Q9UI15	TAGLN3	-0.539113	-0.242284	0.234242	-2.01212	0.0442088	0.127581
Q96JJ3	ELMO2	-0.540747	-0.249741	0.233859	-2.01198	0.0442237	0.127581
Q9UPR0	PLCL2	-0.54128	-0.279145	0.182117	-2.01057	0.0443722	0.12765
P22695	UQCRC2	-0.535331	-0.236554	0.200579	-2.00997	0.0444353	0.12765
O14827	RASGRF2	-0.537102	-0.257925	0.281634	-2.00949	0.0444864	0.12765
Q12931	TRAP1	0.53217	0.0755984	-0.615691	2.00701	0.0447495	0.128175
P19525	EIF2AK2	-0.533079	-0.237746	0.264987	-2.00592	0.0448665	0.128281
O14576	DYNC1I1	-0.53119	-0.21309	0.217809	-2.00416	0.0450542	0.128589
Q9Y2J8	PADI2	-0.534333	-0.195366	0.195154	-2.00076	0.0454192	0.1294
Q9NZJ7	MTCH1	-0.543586	-0.236412	0.249573	-1.9993	0.0455769	0.12962
P62330	ARF6	-0.538688	-0.211213	0.217451	-1.99852	0.0456621	0.129632
Q15293	RCN1	0.528309	0.0806283	-0.518779	1.99329	0.0462311	0.131015
Q9NY65	TUBA8	-0.528925	-0.236595	0.283003	-1.99134	0.0464447	0.131173
P47985	UQCRFS1	-0.535616	-0.212657	0.216337	-1.99129	0.0464501	0.131173
P61106	RAB14	-0.541387	-0.167317	0.268877	-1.99008	0.0465832	0.131261
O95140	MFN2	-0.532706	-0.266896	0.254624	-1.98952	0.0466453	0.131261
Q9GZN7	ROGDI	-0.527974	-0.233584	0.253961	-1.98812	0.0467996	0.131411
Q13510	ASAH1	-0.530118	-0.261681	0.14648	-1.98755	0.0468624	0.131411
Q15042	RAB3GAP1	-0.536069	-0.300363	0.243611	-1.98024	0.0476782	0.133466
P31689	DNAJA1	-0.52366	-0.18456	0.261346	-1.97581	0.0481777	0.134629
Q9P0K9	FRRS1L	-0.524602	-0.164024	0.30306	-1.97284	0.0485153	0.135124
Q16836	HADH	-0.525131	-0.178782	0.204003	-1.97277	0.0485232	0.135124
Q5QNW6	H2BC18	-0.523702	-0.184517	0.183747	-1.97069	0.0487612	0.135551
Q96BY7	ATG2B	-0.522807	-0.278178	0.269223	-1.96831	0.0490334	0.135774
Q92574	TSC1	-0.532311	-0.293738	0.275116	-1.96801	0.0490679	0.135774
Q8WZA2	RAPGEF4	-0.527796	-0.292917	0.267374	-1.96777	0.0490955	0.135774
P43490	NAMPT	-0.525925	-0.177543	0.276075	-1.96499	0.049417	0.136428
P21796	VDAC1	-0.52439	-0.21937	0.232195	-1.96254	0.0497015	0.136978
Q9Y376	CAB39	-0.525525	-0.16765	0.258668	-1.96131	0.0498444	0.137136
Q14254	FLOT2	-0.524256	-0.173944	0.314004	-1.9571	0.0503375	0.138256
P04632	CAPNS1	-0.526208	-0.165579	0.238479	-1.95496	0.0505891	0.138709
O95670	ATP6V1G2	-0.526711	-0.263342	0.2192	-1.95322	0.0507955	0.139038
Q14165	MLEC	0.529592	0.095377	-0.572604	1.9496	0.0512252	0.139923
Q08722	CD47	-0.518718	-0.202507	0.169684	-1.94903	0.0512936	0.139923
P14621	ACYP2	-0.523158	-0.191285	0.186349	-1.94758	0.0514671	0.140158
Q9UDY2	TJP2	-0.518709	-0.166126	0.144704	-1.94273	0.0520499	0.141229
O75381	PEX14	-0.515118	-0.209885	0.25871	-1.94272	0.052052	0.141229
Q9NZB2	FAM120A	-0.515289	-0.258973	0.225469	-1.94212	0.0521246	0.141229
Q08462	ADCY2	-0.517885	-0.272907	0.282644	-1.94023	0.0523528	0.141609
Q86YQ8	CPNE8	-0.526151	-0.233968	0.3062	-1.93836	0.0525802	0.141828
Q6H8Q1	ABLIM2	-0.51517	-0.226457	0.175569	-1.93811	0.0526109	0.141828
Q13190	STX5	-0.515442	-0.214006	0.190744	-1.93718	0.0527243	0.141895
O75145	PPFIA3	-0.51508	-0.269802	0.249547	-1.93345	0.0531825	0.142889
O75122	CLASP2	-0.512884	-0.245542	0.185247	-1.93035	0.0535643	0.143333
O95721	SNAP29	-0.513281	-0.169039	0.158693	-1.93018	0.0535865	0.143333
Q07065	CKAP4	-0.521068	-0.17607	0.332354	-1.92994	0.0536159	0.143333
Q15049	MLC1	-0.524592	-0.240779	0.168983	-1.92919	0.0537082	0.143341
Q9HAR2	ADGRL3	-0.51234	-0.229978	0.223279	-1.92819	0.0538334	0.143437
Q96GW7	BCAN	-0.513647	-0.135138	0.269403	-1.92702	0.0539789	0.143586
Q9Y6D5	ARFGEF2	-0.510739	-0.257687	0.242351	-1.92559	0.0541576	0.143823
Q8N2K0	ABHD12	-0.518314	-0.245821	0.226246	-1.9246	0.054281	0.143912
P26640	VARS1	0.513055	0.025234	-0.536122	1.92198	0.05461	0.144545
Q92736	RYR2	-0.509148	-0.26218	0.217942	-1.92013	0.0548425	0.144921
Q7L5D6	GET4	-0.51719	-0.175896	0.255394	-1.91941	0.0549336	0.144923
Q6DN90	IQSEC1	-0.509145	-0.279757	0.260365	-1.91772	0.0551483	0.145245
Q92900	UPF1	-0.51108	-0.233472	0.281111	-1.91657	0.0552943	0.145245
P19367	HK1	-0.508915	-0.261112	0.18935	-1.91631	0.0553272	0.145245
Q9Y291	MRPS33	-0.507342	-0.15944	0.246884	-1.91422	0.0555931	0.145618
Q15121	PEA15	0.514555	0.0931578	-0.606697	1.91377	0.0556506	0.145618
P30626	SRI	-0.508952	-0.209626	0.132672	-1.90792	0.0564033	0.146651
Q14247	CTTN	-0.507699	-0.191766	0.187242	-1.90782	0.0564164	0.146651
Q6X4W1	NSMF	-0.512039	-0.245251	0.246538	-1.90778	0.0564209	0.146651
Q14738	PPP2R5D	-0.51109	-0.235846	0.19711	-1.90764	0.0564396	0.146651
Q9Y3D6	FIS1	-0.510102	-0.166293	0.202338	-1.90715	0.0565025	0.146651
Q13131	PRKAA1	-0.507981	-0.224103	0.251073	-1.90316	0.0570211	0.147698
O60331	PIP5K1C	-0.512913	-0.256734	0.252787	-1.90263	0.0570903	0.147698
P10915	HAPLN1	-0.509255	-0.154235	0.235151	-1.90026	0.0574	0.14826
Q9NS86	LANCL2	-0.506995	-0.269936	0.211544	-1.89947	0.0575037	0.148289
Q9Y296	TRAPPC4	-0.515613	-0.194315	0.267153	-1.89788	0.0577134	0.148372
P41222	PTGDS	-0.510802	-0.155856	0.151467	-1.89782	0.0577208	0.148372
Q13825	AUH	-0.503422	-0.217645	0.242197	-1.89341	0.0583047	0.149633
P13611	VCAN	-0.501025	-0.157401	0.154126	-1.88587	0.0593141	0.151565
Q9Y4P8	WIPI2	-0.502224	-0.241326	0.180649	-1.88576	0.0593288	0.151565
P07602	PSAP	-0.507803	-0.315142	0.129312	-1.88567	0.0593407	0.151565
Q9BWM7	SFXN3	-0.500849	-0.146611	0.307077	-1.8836	0.0596205	0.152
O75534	CSDE1	-0.502614	-0.226618	0.225331	-1.88301	0.0597009	0.152
P80723	BASP1	-0.498658	-0.16714	0.210779	-1.88144	0.0599131	0.152039
P07437	TUBB	-0.500584	-0.261229	0.255229	-1.88085	0.0599937	0.152039
Q8N5S9	CAMKK1	-0.498956	-0.239971	0.225312	-1.8808	0.0600004	0.152039
Q6L8Q7	PDE12	0.498992	0.00193153	-0.554058	1.8796	0.0601635	0.152045
Q13554	CAMK2B	-0.498095	-0.240644	0.226555	-1.87939	0.0601925	0.152045
Q9UBQ0	VPS29	0.494958	0.0867415	-0.510062	1.86656	0.0619649	0.156159
Q4G176	ACSF3	-0.496253	-0.229777	0.140627	-1.86619	0.0620158	0.156159
P68104	EEF1A1	-0.494558	-0.229415	0.155138	-1.86317	0.0624405	0.156874
Q02952	AKAP12	-0.493852	-0.219084	0.142583	-1.86278	0.0624953	0.156874
Q9NZ56	FMN2	-0.508108	-0.255721	0.212043	-1.86137	0.0626933	0.157125
Q9Y5K5	UCHL5	-0.497101	-0.20647	0.227625	-1.85589	0.063471	0.15874
P51572	BCAP31	0.504268	0.119174	-0.264223	1.85544	0.0635354	0.15874
O14880	MGST3	-0.501142	-0.214483	0.230383	-1.85281	0.0639106	0.159429
Q15878	CACNA1E	-0.497681	-0.244743	0.277535	-1.85159	0.0640858	0.159617
Q5SW79	CEP170	-0.490332	-0.277962	0.17667	-1.84976	0.0643502	0.160027
P49458	SRP9	-0.500601	-0.127596	0.19651	-1.84846	0.0645379	0.16009
Q96DA6	DNAJC19	-0.494004	-0.169681	0.267661	-1.8482	0.0645748	0.16009
P49674	CSNK1E	-0.495686	-0.204186	0.191057	-1.8426	0.0653883	0.161816
Q7Z4W1	DCXR	-0.497345	-0.201445	0.250958	-1.84198	0.0654794	0.161816
P40763	STAT3	-0.48879	-0.248151	0.176699	-1.84134	0.0655739	0.161816
Q96AG4	LRRC59	-0.488865	-0.239994	0.189288	-1.83911	0.065901	0.162374
O14964	HGS	0.486611	0.0654748	-0.515183	1.83585	0.0663813	0.163306
Q13884	SNTB1	-0.491774	-0.204771	0.16579	-1.83335	0.0667524	0.163968
P31930	UQCRC1	-0.48544	-0.235877	0.129412	-1.8286	0.0674616	0.165208
P43897	TSFM	-0.492265	-0.26095	0.238029	-1.82851	0.0674741	0.165208
Q9ULC3	RAB23	-0.496667	-0.199348	0.216255	-1.82733	0.0676513	0.165208
Q9UJ70	NAGK	0.490962	0.040987	-0.550355	1.82721	0.0676694	0.165208
P00367	GLUD1	-0.483632	-0.216814	0.115038	-1.82364	0.0682077	0.166088
Q66K14	TBC1D9B	-0.491845	-0.250069	0.252307	-1.82338	0.0682468	0.166088
Q86TX2	ACOT1	0.493705	0.0181411	-0.538801	1.82245	0.0683881	0.166088
P36957	DLST	-0.483829	-0.201726	0.202739	-1.82208	0.0684439	0.166088
Q9Y4D1	DAAM1	-0.482382	-0.251417	0.173025	-1.81849	0.0689906	0.166908
P07900	HSP90AA1	0.483305	0.103474	-0.560562	1.8183	0.0690199	0.166908
P14927	UQCRB	-0.485928	-0.18843	0.17582	-1.81781	0.069094	0.166908
O14548	COX7A2L	-0.487718	-0.21023	0.173333	-1.81455	0.0695951	0.167866
Q01082	SPTBN1	-0.480619	-0.225815	0.147171	-1.80959	0.0703607	0.169406
Q92552	MRPS27	-0.482604	-0.262547	0.227702	-1.809	0.0704526	0.169406
Q9P2B4	CTTNBP2NL	-0.481813	-0.275698	0.225828	-1.80803	0.070604	0.169406
Q99747	NAPG	-0.482257	-0.187861	0.189552	-1.80769	0.0706563	0.169406
P29966	MARCKS	-0.478633	-0.145199	0.309467	-1.80467	0.071128	0.170283
Q92558	WASF1	-0.49387	-0.24369	0.184032	-1.80217	0.0715203	0.170717
P09471	GNAO1	-0.479015	-0.160878	0.189042	-1.80216	0.0715222	0.170717
Q14457	BECN1	-0.482172	-0.19281	0.261818	-1.80083	0.071731	0.170961
P25786	PSMA1	-0.497365	-0.18493	0.233029	-1.7987	0.0720677	0.171508
Q9Y2S6	TMA7	-0.475505	-0.180785	0.165216	-1.79419	0.0727839	0.172956
P07339	CTSD	-0.478081	-0.241434	0.146744	-1.78994	0.0734651	0.174317
O76054	SEC14L2	0.477993	0.0758573	-0.552898	1.78827	0.0737338	0.174585
Q8N9I0	SYT2	0.474201	0.101143	-0.464646	1.78789	0.073796	0.174585
P05166	PCCB	-0.476084	-0.215077	0.186793	-1.78716	0.0739125	0.174603
O75891	ALDH1L1	0.474486	0.0544668	-0.523089	1.78577	0.0741383	0.174879
P18505	GABRB1	-0.472639	-0.1613	0.298358	-1.78335	0.0745316	0.175549
Q99623	PHB2	-0.473115	-0.125013	0.238945	-1.77646	0.0756579	0.177599
Q9UNZ2	NSFL1C	0.474113	0.0988455	-0.550375	1.7752	0.0758667	0.177599
P55072	VCP	-0.470827	-0.211239	0.191139	-1.77504	0.0758936	0.177599
P51659	HSD17B4	-0.472624	-0.20625	0.194547	-1.7747	0.0759498	0.177599
P61604	HSPE1	-0.472249	-0.161883	0.151353	-1.77466	0.0759558	0.177599
Q00535	CDK5	-0.470923	-0.222971	0.2061	-1.77381	0.0760962	0.177669
Q96JE9	MAP6	-0.480911	-0.277782	0.21685	-1.77193	0.0764072	0.178135
O00330	PDHX	-0.473929	-0.217845	0.198151	-1.769	0.0768957	0.179014
P48047	ATP5PO	-0.47186	-0.180785	0.217449	-1.76833	0.0770081	0.179016
Q4KMP7	TBC1D10B	-0.479068	-0.280379	0.177354	-1.76702	0.0772263	0.179263
Q9P2P5	HECW2	-0.472786	-0.223575	0.262694	-1.76183	0.0781001	0.180614
P41743	PRKCI	-0.468432	-0.230195	0.172938	-1.76164	0.0781321	0.180614
O14495	PLPP3	-0.477321	-0.172555	0.215192	-1.76156	0.0781459	0.180614
P19086	GNAZ	-0.473232	-0.226945	0.197253	-1.75883	0.0786074	0.181061
Q8IXI2	RHOT1	-0.466093	-0.248412	0.140229	-1.75869	0.0786321	0.181061
Q9Y2J2	EPB41L3	-0.466437	-0.188526	0.169374	-1.75842	0.0786778	0.181061
Q96EY1	DNAJA3	-0.466395	-0.170802	0.241839	-1.75716	0.0788926	0.181295
P09525	ANXA4	-0.470018	-0.171157	0.132028	-1.75592	0.0791031	0.181465
P21964	COMT	0.466282	0.034388	-0.534252	1.75503	0.0792564	0.181465
P63244	RACK1	-0.466991	-0.148667	0.218484	-1.75474	0.0793059	0.181465
Q86X55	CARM1	0.476846	0.0366391	-0.532975	1.75407	0.07942	0.181467
Q5TBA9	FRY	-0.471424	-0.288796	0.200753	-1.75105	0.0799385	0.182164
O00305	CACNB4	-0.474697	-0.237683	0.164408	-1.75097	0.0799522	0.182164
P20339	RAB5A	-0.469729	-0.157978	0.225321	-1.74958	0.0801925	0.182452
P61221	ABCE1	-0.464627	-0.207916	0.192874	-1.74834	0.0804066	0.18268
O43670	ZNF207	-0.462303	-0.181457	0.152941	-1.74084	0.081713	0.185334
O75110	ATP9A	-0.467509	-0.170043	0.232993	-1.7397	0.081913	0.185334
Q9BVC4	MLST8	-0.469559	-0.210734	0.180149	-1.73965	0.0819213	0.185334
Q99613	EIF3C	0.461422	0.011465	-0.607764	1.73766	0.082273	0.185727
P53597	SUCLG1	0.462052	0.0446566	-0.519039	1.73676	0.0824308	0.185727
O75363	BCAS1	-0.461135	-0.164169	0.116143	-1.7367	0.0824426	0.185727
P26885	FKBP2	0.462329	0.0624582	-0.579528	1.73168	0.0833322	0.187247
Q7Z7E8	UBE2Q1	-0.463305	-0.244469	0.197866	-1.73154	0.0833571	0.187247
P21291	CSRP1	-0.458926	-0.144537	0.137149	-1.73092	0.0834673	0.187247
P62166	NCS1	-0.463188	-0.155506	0.116713	-1.73	0.0836315	0.187353
Q9NR46	SH3GLB2	0.470646	0.0165722	-0.541322	1.72824	0.0839461	0.187796
Q00325	SLC25A3	-0.463011	-0.209006	0.212028	-1.72757	0.0840669	0.187804
O00562	PITPNM1	-0.465409	-0.275605	0.190661	-1.72544	0.0844499	0.188397
Q9NRY4	ARHGAP35	-0.456792	-0.240245	0.254602	-1.7201	0.0854167	0.19029
P20674	COX5A	-0.458019	-0.17041	0.153465	-1.71939	0.0855445	0.19031
Q9Y6D6	ARFGEF1	-0.458856	-0.247768	0.204153	-1.71802	0.0857955	0.190604
Q9UBB6	NCDN	0.455553	0.0386513	-0.473478	1.71379	0.0865685	0.192048
Q96QK1	VPS35	0.454023	0.04191	-0.495969	1.71316	0.086685	0.192048
A8MVW0	FAM171A2	-0.463587	-0.218267	0.238212	-1.71153	0.0869858	0.192449
P61225	RAP2B	-0.463451	-0.144503	0.254533	-1.70989	0.0872871	0.192849
Q9Y287	ITM2B	-0.455333	-0.160624	0.0919425	-1.70717	0.0877921	0.193698
P34932	HSPA4	-0.453604	-0.148687	0.231302	-1.70427	0.0883324	0.194565
Q9H269	VPS16	-0.467256	-0.257806	0.186168	-1.70376	0.0884275	0.194565
P04075	ALDOA	-0.451776	-0.229902	0.135091	-1.70308	0.0885546	0.194578
O14562	UBFD1	0.456681	0.0550176	-0.517508	1.6983	0.0894527	0.196282
P11217	PYGM	0.454089	0.101529	-0.473671	1.69677	0.0897415	0.196521
P19022	CDH2	-0.451092	-0.151764	0.186716	-1.69643	0.0898067	0.196521
P36542	ATP5F1C	-0.449116	-0.186285	0.1742	-1.69409	0.0902504	0.196994
Q96CX2	KCTD12	-0.449479	-0.171578	0.147229	-1.69399	0.0902682	0.196994
P47870	GABRB2	-0.45426	-0.153535	0.267283	-1.69195	0.0906563	0.197572
A6NGB9	WIPF3	-0.44742	-0.240395	0.102775	-1.68798	0.0914161	0.198957
O43813	LANCL1	-0.44667	-0.196083	0.0766634	-1.68478	0.0920329	0.200028
Q9Y2Q3	GSTK1	0.452786	-0.0273568	-0.566221	1.68261	0.0924516	0.200666
Q9BZC7	ABCA2	-0.451714	-0.208099	0.2042	-1.68039	0.0928827	0.20133
Q7RTN6	STRADA	-0.44774	-0.199343	0.247763	-1.6767	0.0936021	0.202422
P22033	MMUT	0.444573	-0.0226325	-0.563368	1.67651	0.093639	0.202422
Q9Y4W6	AFG3L2	-0.445003	-0.214455	0.157544	-1.67461	0.094012	0.202798
Q14832	GRM3	-0.449087	-0.231002	0.197108	-1.67434	0.094066	0.202798
Q8IZR5	CMTM4	-0.451332	-0.170184	0.220049	-1.6735	0.0942314	0.202882
Q9H6U6	BCAS3	-0.452511	-0.241014	0.20674	-1.67269	0.0943894	0.202892
Q2M3C7	SPHKAP	-0.448237	-0.254316	0.211024	-1.67158	0.0946082	0.202892
Q14155	ARHGEF7	-0.450352	-0.221604	0.228636	-1.67155	0.0946157	0.202892
Q8IWB7	WDFY1	0.448511	0.0524405	-0.524706	1.67044	0.0948347	0.202929
P50995	ANXA11	-0.442704	-0.210088	0.0832813	-1.67018	0.0948856	0.202929
O75746	SLC25A12	-0.442292	-0.180138	0.262824	-1.66445	0.0960235	0.204588
P08559	PDHA1	-0.442786	-0.190249	0.155624	-1.66437	0.0960396	0.204588
Q02338	BDH1	-0.449253	-0.201518	0.114415	-1.66435	0.0960443	0.204588
Q9Y6I3	EPN1	0.440918	0.0679582	-0.522854	1.66366	0.0961821	0.20461
O15079	SNPH	-0.444632	-0.275652	0.162269	-1.66298	0.096318	0.204628
O14908	GIPC1	-0.454422	-0.184619	0.162745	-1.65941	0.0970341	0.205877
P35232	PHB	-0.444238	-0.193402	0.163538	-1.65496	0.0979334	0.207429
P54652	HSPA2	-0.439896	-0.157842	0.0535984	-1.65373	0.0981843	0.207429
Q9NSD9	FARSB	-0.438346	-0.245391	0.120863	-1.65356	0.0982186	0.207429
P22392	NME2	-0.448235	-0.12884	0.107447	-1.65268	0.0983986	0.207429
Q8NFP9	NBEA	-0.439542	-0.20946	0.203775	-1.65261	0.0984126	0.207429
O94967	WDR47	-0.43851	-0.24639	0.173394	-1.64966	0.0990137	0.208423
Q8TBM8	DNAJB14	-0.439218	-0.179975	0.212101	-1.64892	0.0991661	0.20847
Q9P1Y5	CAMSAP3	-0.443357	-0.199737	0.256223	-1.64751	0.0994558	0.208805
O75955	FLOT1	-0.43645	-0.155512	0.262696	-1.64558	0.0998521	0.209363
Q9UL26	RAB22A	-0.443466	-0.205544	0.140234	-1.64358	0.100265	0.209954
P13987	CD59	-0.43641	-0.135263	0.139122	-1.64109	0.100779	0.210756
Q8IUS5	EPHX4	-0.442168	-0.212954	0.249111	-1.63953	0.101104	0.21109
Q9Y5X3	SNX5	0.4379	0.049705	-0.433862	1.63906	0.101202	0.21109
P47756	CAPZB	-0.437756	-0.216292	0.126807	-1.63818	0.101386	0.211199
P23786	CPT2	0.435784	0.0500164	-0.538008	1.63659	0.101718	0.211615
P09493	TPM1	-0.446147	-0.143587	0.245903	-1.63575	0.101893	0.211705
O43427	FIBP	-0.433791	-0.207774	0.146567	-1.63408	0.102244	0.21216
P53985	SLC16A1	-0.442523	-0.169008	0.217669	-1.63208	0.102663	0.212755
P55011	SLC12A2	-0.443316	-0.162744	0.14788	-1.62772	0.103585	0.214388
Q9P2U7	SLC17A7	-0.431246	-0.198186	0.190808	-1.62701	0.103737	0.214426
P06576	ATP5F1B	-0.431562	-0.14509	0.190364	-1.62461	0.104247	0.214715
Q5TH69	ARFGEF3	-0.431389	-0.240802	0.178526	-1.62456	0.104258	0.214715
Q8NFV4	ABHD11	-0.437042	-0.202477	0.158358	-1.62446	0.104279	0.214715
Q13057	COASY	-0.432065	-0.18954	0.192213	-1.62311	0.104568	0.215034
Q13555	CAMK2G	-0.437733	-0.235629	0.176052	-1.62164	0.104882	0.215405
Q969G6	RFK	-0.433425	-0.162318	0.153312	-1.61995	0.105245	0.215874
O43815	STRN	-0.43783	-0.208963	0.135206	-1.61613	0.106068	0.217285
O76024	WFS1	-0.431271	-0.238525	0.0720091	-1.61264	0.106824	0.218554
P27105	STOM	-0.436806	-0.182598	0.161222	-1.61167	0.107036	0.218708
Q9NPQ8	RIC8A	-0.433608	-0.192346	0.160383	-1.60892	0.107636	0.219655
Q9Y2X7	GIT1	-0.427968	-0.226587	0.1819	-1.60566	0.10835	0.220831
P04181	OAT	0.427509	0.0223639	-0.508898	1.60088	0.109405	0.222698
Q9P0K1	ADAM22	-0.432189	-0.204086	0.13281	-1.59378	0.110987	0.225632
Q7KZF4	SND1	-0.431499	-0.232071	0.102871	-1.59019	0.111794	0.226984
P31150	GDI1	-0.423997	-0.148012	0.116976	-1.58445	0.113093	0.229331
P00403	MT-CO2	-0.419972	-0.177988	0.139408	-1.57901	0.114336	0.231559
Q9Y426	C2CD2	-0.418847	-0.196776	0.150852	-1.57573	0.11509	0.232792
Q9HD20	ATP13A1	-0.421703	-0.268297	0.182259	-1.57452	0.115368	0.233061
P13073	COX4I1	-0.417389	-0.167798	0.132458	-1.57016	0.11638	0.234565
P17152	TMEM11	-0.417095	-0.177545	0.175376	-1.57005	0.116405	0.234565
Q99962	SH3GL2	0.41692	0.0828574	-0.474753	1.56811	0.116857	0.23518
P26196	DDX6	-0.423484	-0.17041	0.197546	-1.56486	0.117618	0.236415
Q14416	GRM2	-0.41587	-0.242894	0.229673	-1.56316	0.118016	0.236841
Q76NI1	KNDC1	-0.419097	-0.209999	0.253275	-1.5627	0.118125	0.236841
Q13885	TUBB2A	-0.416763	-0.185655	0.201111	-1.5583	0.119164	0.238625
Q5T5U3	ARHGAP21	-0.418296	-0.223239	0.205759	-1.55137	0.120815	0.241337
P55087	AQP4	-0.417108	-0.19783	0.0431334	-1.55135	0.120819	0.241337
Q9Y5K8	ATP6V1D	-0.413112	-0.131012	0.231969	-1.54989	0.121169	0.241684
O43854	EDIL3	-0.419125	-0.135101	0.0974985	-1.54937	0.121294	0.241684
O00483	NDUFA4	-0.417826	-0.175084	0.158684	-1.54826	0.12156	0.241862
Q8N111	CEND1	-0.410776	-0.214384	0.130828	-1.54775	0.121685	0.241862
P14406	COX7A2	-0.411054	-0.168956	0.132923	-1.54	0.123562	0.245289
Q8TDJ6	DMXL2	-0.408186	-0.257503	0.14343	-1.53877	0.123863	0.245566
Q8TBX8	PIP4K2C	-0.407652	-0.217839	0.140242	-1.53817	0.124008	0.245566
Q8N3P4	VPS8	-0.408359	-0.246694	0.183547	-1.53537	0.124694	0.246621
Q7Z460	CLASP1	-0.41314	-0.24565	0.0455784	-1.53318	0.125233	0.247381
P48651	PTDSS1	-0.412358	-0.181563	0.22021	-1.53142	0.125666	0.247898
P17252	PRKCA	-0.413404	-0.216248	0.137878	-1.53087	0.125804	0.247898
P11177	PDHB	-0.410879	-0.191361	0.117914	-1.52728	0.126693	0.249345
P24752	ACAT1	-0.405272	-0.19021	0.138511	-1.5257	0.127086	0.249811
P25098	GRK2	-0.411592	-0.223308	0.150723	-1.52307	0.127743	0.250573
P18507	GABRG2	-0.417733	-0.217449	0.201168	-1.5229	0.127786	0.250573
P60880	SNAP25	-0.404552	-0.155234	0.14941	-1.51882	0.12881	0.252272
O14936	CASK	-0.408818	-0.227251	0.159609	-1.51804	0.129006	0.252349
Q96JH7	VCPIP1	-0.406936	-0.249153	0.204247	-1.51375	0.130091	0.253874
O43237	DYNC1LI2	-0.413709	-0.182947	0.124523	-1.5137	0.130102	0.253874
P06396	GSN	-0.400501	-0.136688	0.0683852	-1.50836	0.131465	0.255985
Q5H9R7	PPP6R3	-0.407595	-0.221193	0.170006	-1.50821	0.131503	0.255985
P43003	SLC1A3	-0.409065	-0.0812494	0.250506	-1.50547	0.132206	0.256935
O14775	GNB5	-0.398939	-0.169373	0.117273	-1.50473	0.132395	0.256935
P0DMV9	HSPA1B	-0.398736	-0.156534	0.0795954	-1.50443	0.132472	0.256935
P24539	ATP5PB	-0.398402	-0.183426	0.1609	-1.49918	0.133829	0.259253
P62879	GNB2	0.404182	0.000184134	-0.496205	1.49814	0.134099	0.259305
P52565	ARHGDIA	0.397746	0.111611	-0.442259	1.49721	0.13434	0.259305
Q86WG3	ATCAY	0.39668	0.0416072	-0.424013	1.49678	0.134453	0.259305
Q9Y3E5	PTRH2	-0.405089	-0.20455	0.0994714	-1.49659	0.134503	0.259305
Q96JB5	CDK5RAP3	-0.403787	-0.16119	0.0674736	-1.49217	0.135656	0.261215
Q04837	SSBP1	-0.405508	-0.117668	0.195579	-1.49047	0.136102	0.26176
P50990	CCT8	-0.397464	-0.201051	0.140981	-1.48883	0.136534	0.262275
Q93050	ATP6V0A1	-0.393862	-0.223446	0.157003	-1.48611	0.137252	0.263128
Q7RTP6	MICAL3	-0.400347	-0.226635	0.0980008	-1.48591	0.137306	0.263128
Q6GYQ0	RALGAPA1	-0.401963	-0.234004	0.123867	-1.48524	0.137482	0.263151
Q96JN2	CCDC136	-0.401443	-0.191725	0.147577	-1.48369	0.137893	0.263624
P55084	HADHB	-0.395416	-0.167026	0.0973186	-1.48198	0.138349	0.26418
P23634	ATP2B4	-0.39482	-0.194678	0.186133	-1.48108	0.138586	0.264318
P57088	TMEM33	-0.397454	-0.20444	0.161595	-1.47885	0.139183	0.264769
Q9BQ69	MACROD1	0.394458	-0.0306874	-0.514038	1.47861	0.139246	0.264769
Q9UGC6	RGS17	-0.394094	-0.14526	0.117066	-1.47834	0.139317	0.264769
P68366	TUBA4A	-0.399402	-0.220596	0.162778	-1.47045	0.141442	0.268489
Q9Y3F4	STRAP	-0.393931	-0.190282	0.101719	-1.46953	0.141692	0.268644
P36969	GPX4	-0.393131	-0.214648	0.0258717	-1.46803	0.142098	0.269097
Q9UPT6	MAPK8IP3	-0.394504	-0.180933	0.140695	-1.46202	0.143739	0.271883
Q9NQ66	PLCB1	0.388783	-0.0583924	-0.549819	1.46058	0.144131	0.272305
Q16864	ATP6V1F	-0.390542	-0.121051	0.188515	-1.45838	0.144737	0.272744
O43295	SRGAP3	-0.387246	-0.205658	0.124356	-1.45789	0.144874	0.272744
P62820	RAB1A	-0.391936	-0.108056	0.142623	-1.45771	0.144922	0.272744
Q9Y285	FARSA	-0.388374	-0.209762	0.107755	-1.45707	0.1451	0.272744
P26232	CTNNA2	-0.388018	-0.189311	0.123204	-1.45665	0.145214	0.272744
Q9Y4I1	MYO5A	-0.386817	-0.235734	0.153925	-1.45554	0.145522	0.273002
O75962	TRIO	-0.386807	-0.236431	0.181991	-1.45442	0.145833	0.273219
Q9NVA1	UQCC1	-0.386505	-0.148636	0.157603	-1.45347	0.146094	0.273219
Q9NT62	ATG3	-0.385036	-0.172529	0.109109	-1.45282	0.146276	0.273219
P07814	EPRS1	-0.386512	-0.17319	0.136808	-1.45266	0.146319	0.273219
Q9H845	ACAD9	-0.392646	-0.206733	0.167483	-1.45113	0.146746	0.273698
Q8TAC9	SCAMP5	-0.392794	-0.114918	0.245604	-1.44979	0.147118	0.274074
O75390	CS	-0.385752	-0.198517	0.0725166	-1.44839	0.14751	0.274485
P14136	GFAP	-0.383911	-0.141482	0.03577	-1.44771	0.1477	0.27452
Q7L2E3	DHX30	-0.389642	-0.241373	0.149119	-1.44639	0.148069	0.274888
Q5T0F9	CC2D1B	-0.387175	-0.18232	-0.0248454	-1.44544	0.148337	0.275067
Q5T5C0	STXBP5	0.38596	0.00500091	-0.463181	1.44359	0.148857	0.275712
Q15149	PLEC	-0.382025	-0.209961	0.0691991	-1.44152	0.149439	0.276471
Q8TEA8	DTD1	-0.382402	-0.177992	0.148771	-1.43995	0.149884	0.276975
Q01518	CAP1	-0.389173	-0.143936	0.139048	-1.43865	0.150251	0.277333
Q9Y4G8	RAPGEF2	-0.382331	-0.232621	0.143222	-1.43766	0.150532	0.277532
P05109	S100A8	-0.38045	-0.05989	0.212327	-1.43499	0.151291	0.278612
P60174	TPI1	0.380317	0.0596713	-0.471256	1.43401	0.151571	0.278807
Q6P1N0	CC2D1A	-0.38392	-0.181562	0.166328	-1.43293	0.151879	0.279054
P22830	FECH	-0.382854	-0.184075	0.183132	-1.42997	0.152727	0.280249
P62979	RPS27A	-0.385129	-0.13757	0.18906	-1.42944	0.152879	0.280249
O96000	NDUFB10	-0.384255	-0.141111	0.206162	-1.42837	0.153187	0.280484
Q9UI09	NDUFA12	-0.378601	-0.125957	0.207757	-1.42778	0.153357	0.280484
O94919	ENDOD1	-0.374664	-0.13062	0.118636	-1.41352	0.157504	0.287706
Q13045	FLII	-0.385968	-0.234621	0.130795	-1.41298	0.157664	0.287706
O75165	DNAJC13	0.378838	0.0960018	-0.432675	1.4099	0.158571	0.28866
Q8IYB4	PEX5L	-0.37776	-0.25222	0.102717	-1.40974	0.158618	0.28866
Q05329	GAD2	0.375731	-0.00191923	-0.384547	1.40937	0.158727	0.28866
P08237	PFKM	-0.374578	-0.209355	0.138974	-1.40843	0.159005	0.288837
P08238	HSP90AB1	0.373092	0.0521135	-0.441836	1.40765	0.159235	0.288929
Q9H2X9	SLC12A5	-0.372503	-0.239076	0.134192	-1.40547	0.159882	0.289775
Q16795	NDUFA9	-0.371617	-0.141988	0.182108	-1.40195	0.160933	0.290748
Q9NYB9	ABI2	-0.380669	-0.216004	0.178273	-1.40155	0.161052	0.290748
O14976	GAK	-0.374748	-0.231281	0.157418	-1.40131	0.161123	0.290748
Q99426	TBCB	0.371374	0.0420144	-0.478488	1.40124	0.161144	0.290748
P30049	ATP5F1D	-0.374335	-0.1553	0.12556	-1.39839	0.161998	0.29196
P28472	GABRB3	-0.375874	-0.186257	0.211218	-1.39489	0.163049	0.292521
Q14166	TTLL12	-0.37909	-0.215939	0.1368	-1.39486	0.16306	0.292521
P10644	PRKAR1A	-0.380651	-0.144794	0.0586177	-1.39484	0.163067	0.292521
Q71U36	TUBA1A	-0.371263	-0.169986	0.159926	-1.39452	0.163162	0.292521
Q92777	SYN2	-0.369566	-0.231945	0.147127	-1.39433	0.163221	0.292521
O43765	SGTA	0.376744	0.0542282	-0.479943	1.39011	0.164497	0.294478
O43674	NDUFB5	-0.36802	-0.122612	0.169693	-1.38862	0.164951	0.294962
O00571	DDX3X	-0.369673	-0.192875	0.0506384	-1.38751	0.165288	0.295235
Q96PU8	QKI	-0.374055	-0.152413	0.0881083	-1.38635	0.165642	0.29554
Q13724	MOGS	-0.374852	-0.218762	0.115468	-1.38164	0.167084	0.297782
O43169	CYB5B	-0.365881	-0.114239	0.204824	-1.37365	0.169551	0.301843
P49368	CCT3	-0.366551	-0.200169	0.112272	-1.37293	0.169776	0.301908
P09622	DLD	-0.36975	-0.1778	0.0836316	-1.37096	0.170388	0.30266
Q9Y3I0	RTCB	-0.362455	-0.183788	0.0874726	-1.36689	0.171661	0.304421
Q99683	MAP3K5	-0.367742	-0.222189	0.169375	-1.36658	0.171759	0.304421
P04843	RPN1	-0.36178	-0.16331	0.12482	-1.36495	0.172271	0.304992
P03915	MT-ND5	-0.368798	-0.138717	0.219516	-1.36353	0.172718	0.305215
A7KAX9	ARHGAP32	-0.362147	-0.20956	0.106872	-1.36334	0.172778	0.305215
P63167	DYNLL1	-0.367097	-0.195097	0.0572149	-1.36152	0.173352	0.305802
P43304	GPD2	-0.365761	-0.200378	0.171083	-1.36108	0.173491	0.305802
P08195	SLC3A2	-0.368225	-0.126627	0.207415	-1.36029	0.173741	0.305906
Q86YS7	C2CD5	-0.361416	-0.232976	0.0847155	-1.3593	0.174054	0.306121
Q13572	ITPK1	0.359468	0.022228	-0.429158	1.35543	0.175282	0.307944
P56378	ATP5MJ	-0.361293	-0.107323	0.205033	-1.35292	0.176081	0.309009
Q15120	PDK3	-0.362897	-0.243936	0.0449269	-1.35056	0.176836	0.309988
P13489	RNH1	0.359466	0.0307763	-0.464668	1.34998	0.177025	0.309988
Q99798	ACO2	-0.358005	-0.156777	0.0806691	-1.34801	0.177655	0.31054
P86790	CCZ1B	-0.365396	-0.200063	0.0334175	-1.3475	0.17782	0.31054
Q9P1U1	ACTR3B	-0.364478	-0.161454	0.179046	-1.34719	0.177922	0.31054
Q8TCZ2	CD99L2	-0.37069	-0.120183	0.203186	-1.34476	0.178703	0.311565
P62873	GNB1	-0.358226	-0.155478	0.0625548	-1.34404	0.178936	0.311632
Q5HYI7	MTX3	-0.362548	-0.199573	0.106575	-1.3424	0.179468	0.311904
Q15006	EMC2	-0.363498	-0.119784	0.195678	-1.34197	0.179608	0.311904
Q9BY44	EIF2A	-0.356976	-0.148864	0.138962	-1.34169	0.179697	0.311904
Q9Y6G9	DYNC1LI1	-0.355562	-0.215524	0.115829	-1.34116	0.17987	0.311904
P53677	AP3M2	0.361807	-0.0173331	-0.370482	1.34028	0.180156	0.311978
P63010	AP2B1	-0.357942	-0.216789	0.133563	-1.3398	0.18031	0.311978
O95970	LGI1	-0.355761	-0.143474	0.141791	-1.33833	0.180792	0.311978
Q4G0F5	VPS26B	0.359249	0.0428946	-0.449582	1.33756	0.18104	0.311978
O00767	SCD	-0.36376	-0.115335	0.183921	-1.33745	0.181076	0.311978
P36543	ATP6V1E1	-0.355015	-0.174955	0.145416	-1.33744	0.18108	0.311978
P25705	ATP5F1A	-0.354309	-0.164631	0.127675	-1.33504	0.181864	0.312993
Q02750	MAP2K1	0.357824	0.0238993	-0.482029	1.33418	0.182147	0.313144
Q9Y4E6	WDR7	-0.354759	-0.227881	0.124422	-1.33324	0.182453	0.31328
P31943	HNRNPH1	-0.357594	-0.100427	0.061279	-1.33275	0.182617	0.31328
P14649	MYL6B	-0.353724	-0.196443	0.187526	-1.33189	0.182896	0.313425
Q8N987	NECAB1	0.356212	0.0470204	-0.473472	1.32977	0.183597	0.31429
Q68DU8	KCTD16	-0.353903	-0.233429	0.0835862	-1.32621	0.184771	0.315963
Q96GC9	VMP1	-0.364037	-0.207242	0.119178	-1.32506	0.185153	0.316279
P10606	COX5B	-0.354931	-0.149262	0.0627529	-1.32215	0.18612	0.317552
O95182	NDUFA7	-0.350252	-0.158957	0.155004	-1.32131	0.186399	0.317552
P05496	ATP5MC1	-0.359423	-0.154882	0.0844945	-1.32103	0.186492	0.317552
P11182	DBT	-0.349272	-0.20285	0.10703	-1.31707	0.187817	0.319468
P78406	RAE1	-0.354165	-0.164837	0.0321461	-1.31136	0.189737	0.322346
Q9UQ16	DNM3	-0.348451	-0.186807	0.0935321	-1.31067	0.18997	0.322346
Q9H8M1	COQ10B	-0.347489	-0.204478	0.0693929	-1.31009	0.190166	0.322346
P07203	GPX1	-0.35077	-0.140036	0.0926429	-1.30966	0.190313	0.322346
P04899	GNAI2	-0.346051	-0.141825	0.0482501	-1.30484	0.191948	0.324773
O75489	NDUFS3	-0.345779	-0.129903	0.168779	-1.3038	0.192303	0.324897
P54920	NAPA	-0.345621	-0.139772	0.0585069	-1.30339	0.192443	0.324897
Q03001	DST	-0.348959	-0.186364	0.0735437	-1.30284	0.192629	0.324897
Q9BXS5	AP1M1	0.345506	0.0478606	-0.445217	1.29965	0.193723	0.325998
Q9NTX5	ECHDC1	-0.350282	-0.16379	0.0952515	-1.29936	0.193822	0.325998
P10515	DLAT	-0.344485	-0.188879	0.0836306	-1.29916	0.193891	0.325998
Q14152	EIF3A	0.346895	0.0387933	-0.433291	1.29636	0.194853	0.327271
P56556	NDUFA6	-0.346438	-0.123033	0.171013	-1.29552	0.195144	0.327418
O75936	BBOX1	0.344337	0.0371746	-0.405391	1.29437	0.195538	0.327736
P61421	ATP6V0D1	-0.343121	-0.210309	0.119105	-1.29267	0.196125	0.328377
P68371	TUBB4B	-0.348958	-0.200987	0.138084	-1.29152	0.196525	0.328395
Q9Y5M8	SRPRB	-0.351325	-0.177294	0.121075	-1.29146	0.196546	0.328395
Q8N122	RPTOR	-0.348892	-0.21625	0.163467	-1.28805	0.197729	0.330028
Q8NBS9	TXNDC5	0.345822	0.0300405	-0.435857	1.28567	0.19856	0.331071
O95433	AHSA1	0.339876	0.00192444	-0.425927	1.28227	0.19975	0.33271
Q9NR31	SAR1A	-0.345294	-0.161084	0.065543	-1.28158	0.19999	0.332763
Q9UH03	SEPTIN3	-0.344272	-0.195812	0.0877227	-1.28095	0.200215	0.332792
P52306	RAP1GDS1	0.341208	0.0133817	-0.452093	1.27913	0.200854	0.33351
Q9H3P7	ACBD3	-0.342152	-0.185341	0.0770087	-1.27027	0.203991	0.338368
Q9H1K0	RBSN	-0.336505	-0.165169	0.0743614	-1.26954	0.20425	0.338447
O00170	AIP	-0.335845	-0.11187	0.192006	-1.26515	0.205821	0.340438
Q96A65	EXOC4	-0.341581	-0.206682	0.0915904	-1.26499	0.205876	0.340438
O75306	NDUFS2	-0.335955	-0.19662	0.123206	-1.26351	0.206407	0.340965
Q96FC7	PHYHIPL	0.336188	0.0216758	-0.415625	1.26278	0.20667	0.341048
Q9Y6C9	MTCH2	-0.338466	-0.175937	0.126674	-1.25978	0.207752	0.342481
P04406	GAPDH	-0.334191	-0.139146	0.132046	-1.25689	0.208794	0.343845
P29120	PCSK1	-0.333559	-0.177385	0.152964	-1.25135	0.210808	0.346806
Q2M2I8	AAK1	-0.330911	-0.191481	0.0725825	-1.24847	0.211859	0.348178
Q9P0J0	NDUFA13	-0.330372	-0.131088	0.159748	-1.2461	0.21273	0.349251
Q9H1Z4	WDR13	-0.328886	-0.178884	0.122923	-1.24004	0.214961	0.352287
P26641	EEF1G	0.328754	-0.0107588	-0.452927	1.23938	0.215206	0.352287
Q96GD0	PDXP	0.328784	0.0336554	-0.367133	1.23872	0.215452	0.352287
P43034	PAFAH1B1	0.328275	0.0272273	-0.392949	1.2387	0.215457	0.352287
Q9P035	HACD3	-0.327801	-0.140996	0.104718	-1.23547	0.216658	0.35389
O94910	ADGRL1	-0.327382	-0.202452	0.130587	-1.23126	0.218228	0.356092
Q9H1K1	ISCU	-0.336236	-0.167036	0.113456	-1.22988	0.218744	0.3564
Q13085	ACACA	-0.333174	-0.214655	0.108753	-1.22957	0.218861	0.3564
Q86SK9	SCD5	-0.327932	-0.148735	0.113598	-1.22868	0.219194	0.356543
Q15904	ATP6AP1	-0.331187	-0.129554	0.184495	-1.22815	0.219394	0.356543
Q9UBP0	SPAST	-0.329206	-0.164023	0.0617837	-1.22192	0.22174	0.35932
Q9UK22	FBXO2	0.327622	0.0533289	-0.41011	1.22191	0.221744	0.35932
Q99719	SEPTIN5	-0.326549	-0.227866	0.0784586	-1.22183	0.221775	0.35932
P22234	PAICS	-0.329889	-0.205358	0.0892195	-1.22089	0.22213	0.359351
Q9Y3S1	WNK2	-0.328279	-0.243214	0.105796	-1.22059	0.222242	0.359351
Q01813	PFKP	-0.323898	-0.215496	0.0957474	-1.21931	0.222728	0.359774
P35611	ADD1	-0.323269	-0.177238	0.0670751	-1.21797	0.223236	0.359959
P13804	ETFA	-0.323497	-0.1593	0.0367011	-1.21783	0.223291	0.359959
Q9NQ48	LZTFL1	0.330002	0.0385998	-0.411594	1.21596	0.224001	0.360741
Q9Y265	RUVBL1	-0.32147	-0.191215	0.125963	-1.21297	0.225143	0.362216
P30520	ADSS2	0.32594	0.0186483	-0.371733	1.20971	0.22639	0.363795
P24588	AKAP5	-0.324518	-0.213555	0.0610727	-1.20855	0.226837	0.363795
O75947	ATP5PD	-0.323992	-0.170447	0.0967697	-1.20807	0.227022	0.363795
Q13409	DYNC1I2	-0.322633	-0.15617	0.0761433	-1.20804	0.227032	0.363795
Q9NV70	EXOC1	-0.327871	-0.207687	0.066288	-1.20363	0.228732	0.365873
O00429	DNM1L	0.319152	0.00240568	-0.454133	1.2035	0.228785	0.365873
Q15048	LRRC14	-0.324014	-0.195105	0.0565335	-1.20175	0.229463	0.366495
Q9BWQ8	FAIM2	-0.324771	-0.119648	0.118564	-1.20131	0.229631	0.366495
P38117	ETFB	-0.318755	-0.184535	-0.0343083	-1.20066	0.229885	0.366536
P49327	FASN	0.3182	-0.0145461	-0.392972	1.1984	0.230764	0.366857
P16112	ACAN	-0.31854	-0.0626836	0.0767696	-1.19832	0.230795	0.366857
O14910	LIN7A	-0.32343	-0.176126	0.0929377	-1.19808	0.230889	0.366857
P30084	ECHS1	-0.319884	-0.150406	-0.00737603	-1.19779	0.231001	0.366857
P38606	ATP6V1A	-0.321474	-0.218339	0.118327	-1.19385	0.232538	0.368933
O75251	NDUFS7	-0.324433	-0.174705	0.106645	-1.19189	0.233308	0.369788
Q9HAD4	WDR41	-0.316107	-0.152031	0.111313	-1.19117	0.233589	0.369868
P48643	CCT5	-0.314417	-0.155128	0.0835509	-1.18635	0.235484	0.372309
Q99584	S100A13	-0.325463	-0.160933	0.0511829	-1.18607	0.235595	0.372309
P21579	SYT1	-0.31412	-0.136454	0.190496	-1.18514	0.235962	0.372523
Q8IXS6	PALM2AKAP2	-0.322736	-0.211555	0.0933283	-1.18209	0.237172	0.373698
Q6PCB7	SLC27A1	-0.31598	-0.183822	0.0731613	-1.18209	0.237172	0.373698
Q8NDA8	MROH1	-0.31598	-0.230608	0.0927705	-1.18026	0.237897	0.374472
P53999	SUB1	-0.318399	-0.121773	0.129146	-1.17903	0.238387	0.374875
P27544	CERS1	-0.316934	-0.153094	0.0918327	-1.17817	0.238732	0.374999
Q96KP4	CNDP2	0.312266	0.072795	-0.355215	1.17766	0.238933	0.374999
O43181	NDUFS4	-0.313678	-0.131533	0.156657	-1.17702	0.239191	0.375036
O75146	HIP1R	-0.311827	-0.164506	0.0571462	-1.17581	0.239672	0.375421
P03891	MT-ND2	-0.314706	-0.140701	0.150907	-1.17523	0.239904	0.375421
P12931	SRC	-0.311842	-0.194496	0.0728885	-1.17344	0.240621	0.375727
P36404	ARL2	-0.313362	-0.152662	-0.0019949	-1.17304	0.240781	0.375727
O94874	UFL1	-0.31096	-0.200592	0.0703868	-1.17299	0.240802	0.375727
Q6UXD5	SEZ6L2	-0.310747	-0.171491	0.0938233	-1.16901	0.242401	0.377853
Q9NZR1	TMOD2	-0.31048	-0.111685	0.094999	-1.16697	0.243223	0.378767
Q9UPN3	MACF1	-0.308626	-0.209348	0.0390096	-1.16376	0.244521	0.379826
Q9ULU8	CADPS	0.308238	-0.0214182	-0.403756	1.16306	0.244806	0.379826
P22061	PCMT1	-0.315386	-0.149269	0.0817079	-1.1625	0.245032	0.379826
Q13875	MOBP	-0.313662	-0.0939132	0.0472131	-1.16238	0.245084	0.379826
Q9UJC5	SH3BGRL2	-0.309706	-0.125863	0.0760775	-1.16237	0.245087	0.379826
Q7L5N1	COPS6	0.312579	0.0433336	-0.406923	1.16097	0.245656	0.380341
P31323	PRKAR2B	0.312851	-0.0281711	-0.393241	1.15995	0.246071	0.380615
Q8N1G4	LRRC47	-0.307254	-0.217238	0.0290475	-1.15886	0.246514	0.380934
P29692	EEF1D	0.307391	0.0168469	-0.443325	1.15803	0.246854	0.381091
Q9Y2E4	DIP2C	-0.312991	-0.182224	0.0218908	-1.15642	0.247511	0.381738
Q9Y2G0	EFR3B	-0.307433	-0.221019	0.0805327	-1.15081	0.249811	0.384472
Q14195	DPYSL3	-0.30957	-0.158475	0.0469939	-1.15059	0.249901	0.384472
P23284	PPIB	-0.311252	-0.158973	0.0631143	-1.15035	0.250003	0.384472
Q5TF21	SOGA3	-0.304628	-0.162811	0.0465891	-1.14947	0.250362	0.384656
P23246	SFPQ	-0.304348	-0.160466	0.0407318	-1.14711	0.251339	0.385788
P35080	PFN2	0.30365	0.05317	-0.387078	1.1446	0.252378	0.386543
Q9Y305	ACOT9	-0.307054	-0.188011	0.0825045	-1.14442	0.252453	0.386543
Q9UHQ4	BCAP29	-0.305437	-0.0890562	0.234036	-1.14417	0.252554	0.386543
P47736	RAP1GAP	-0.303625	-0.185799	0.0586417	-1.14301	0.253035	0.38691
P17600	SYN1	-0.302672	-0.178372	0.108456	-1.14181	0.253533	0.387301
Q92930	RAB8B	-0.309329	-0.127769	0.0350205	-1.14061	0.254036	0.387701
P11216	PYGB	0.30207	-0.0295715	-0.345675	1.13973	0.254402	0.387826
Q86Y39	NDUFA11	-0.303461	-0.140268	0.0959261	-1.13921	0.254615	0.387826
P60981	DSTN	0.308617	-0.00566292	-0.428342	1.13867	0.254843	0.387826
O43676	NDUFB3	-0.309741	-0.132908	0.159577	-1.13767	0.25526	0.388092
Q6KCM7	SLC25A25	-0.306881	-0.0771047	0.201071	-1.13534	0.256233	0.389203
Q96AQ6	PBXIP1	0.300823	-0.00561994	-0.40226	1.13469	0.256505	0.389247
Q9H3K2	GHITM	-0.301122	-0.112547	0.16646	-1.13402	0.256789	0.38931
P05198	EIF2S1	-0.304808	-0.123058	0.0309136	-1.13207	0.257605	0.390178
Q9HD33	MRPL47	-0.306489	-0.187051	0.188192	-1.13048	0.258275	0.390824
Q9H3S7	PTPN23	-0.299996	-0.201148	0.0519422	-1.12981	0.258556	0.390824
Q9BUF5	TUBB6	-0.299657	-0.214216	0.113079	-1.12932	0.258762	0.390824
Q9NZ01	TECR	-0.302439	-0.182695	0.13232	-1.12268	0.261576	0.394701
P06241	FYN	-0.298043	-0.184168	0.0263793	-1.11938	0.26298	0.396447
Q05193	DNM1	-0.297069	-0.178316	0.0675296	-1.11867	0.263284	0.396533
Q9Y678	COPG1	-0.299661	-0.17677	0.019352	-1.11535	0.264702	0.398295
Q02252	ALDH6A1	0.2988	-0.0371733	-0.46769	1.11367	0.265424	0.399007
O75781	PALM	-0.298329	-0.129321	0.0440944	-1.11199	0.266146	0.399717
Q96FW1	OTUB1	0.295036	0.00165688	-0.397946	1.1096	0.267173	0.400307
Q8N0X7	SPART	-0.298261	-0.176546	0.0378495	-1.10947	0.267231	0.400307
Q14008	CKAP5	-0.29495	-0.213424	0.0392115	-1.10933	0.267287	0.400307
P36507	MAP2K2	-0.297481	-0.171607	0.0491521	-1.10818	0.267784	0.400561
P28331	NDUFS1	-0.294063	-0.209676	0.0671105	-1.10778	0.267956	0.400561
O95139	NDUFB6	-0.293505	-0.0955047	0.179715	-1.10647	0.268523	0.400895
Q8N568	DCLK2	-0.293649	-0.20683	0.0481077	-1.10611	0.26868	0.400895
P40939	HADHA	-0.29277	-0.202553	-0.0281644	-1.10406	0.269566	0.401844
Q8WXG6	MADD	-0.292904	-0.176334	0.113424	-1.10342	0.269848	0.401891
Q99961	SH3GL1	0.291244	0.0271176	-0.420955	1.09829	0.272079	0.404606
P31040	SDHA	-0.297005	-0.211636	0.00297903	-1.09788	0.27226	0.404606
P61764	STXBP1	0.290855	0.00897567	-0.368843	1.09749	0.272428	0.404606
Q9NX14	NDUFB11	-0.297697	-0.165229	0.0867352	-1.09466	0.273667	0.406054
Q04917	YWHAH	0.290606	0.0248006	-0.38107	1.09367	0.2741	0.406054
O00264	PGRMC1	0.292009	0.0404725	-0.415389	1.09353	0.274162	0.406054
P40227	CCT6A	-0.291585	-0.160752	0.082732	-1.08885	0.276221	0.408093
Q6Y1H2	HACD2	-0.301267	-0.173105	0.0933003	-1.08879	0.276248	0.408093
P53618	COPB1	-0.289065	-0.193234	0.00760136	-1.08867	0.276302	0.408093
P43004	SLC1A2	-0.291652	-0.0840407	0.137492	-1.08765	0.276753	0.408301
Q9BQG1	SYT3	-0.294132	-0.155557	0.101582	-1.0872	0.276952	0.408301
Q5TCZ1	SH3PXD2A	0.289685	-0.144108	-0.448524	1.084	0.278366	0.410008
Q9Y3C8	UFC1	0.294959	0.0262413	-0.395872	1.08313	0.278751	0.410199
Q5JPH6	EARS2	-0.287495	-0.177872	0.0861547	-1.08113	0.279643	0.411134
O00154	ACOT7	0.289477	-0.00591642	-0.2979	1.08006	0.280115	0.411451
P30085	CMPK1	-0.286286	-0.117948	-0.0659951	-1.07571	0.282059	0.413518
O43491	EPB41L2	-0.286158	-0.116288	-0.0243692	-1.07518	0.282293	0.413518
P62888	RPL30	-0.288079	-0.109858	0.0868085	-1.07518	0.282296	0.413518
P06733	ENO1	-0.28425	-0.0925401	0.0451135	-1.07188	0.283776	0.415124
Q14240	EIF4A2	0.284319	0.0237855	-0.36054	1.07158	0.283909	0.415124
P23528	CFL1	0.283254	-0.00831115	-0.415463	1.06876	0.285179	0.416566
P04083	ANXA1	-0.28427	-0.10007	0.0295396	-1.06814	0.285457	0.416566
Q00169	PITPNA	-0.288383	-0.173179	0.00432478	-1.06766	0.285675	0.416566
P42345	MTOR	-0.282259	-0.222877	0.0710703	-1.06497	0.286893	0.417962
P49802	RGS7	-0.286562	-0.168386	0.0145001	-1.06297	0.287797	0.418899
Q9H061	TMEM126A	-0.281606	-0.114007	0.142737	-1.06187	0.288296	0.419245
O95299	NDUFA10	-0.282999	-0.169224	0.042721	-1.06127	0.288571	0.419264
O14561	NDUFAB1	-0.287727	-0.116046	0.0174967	-1.05777	0.29016	0.421191
Q969Z3	MTARC2	-0.28511	-0.162763	0.104741	-1.05587	0.29103	0.422073
Q9NXC2	GFOD1	-0.282103	-0.16427	0.0558275	-1.05205	0.292779	0.424225
P36915	GNL1	-0.278342	-0.146312	0.0789866	-1.04951	0.293945	0.42553
P67775	PPP2CA	0.283531	-0.0368302	-0.42133	1.04866	0.294334	0.42571
Q8N6T3	ARFGAP1	-0.279233	-0.201306	0.0657903	-1.0476	0.294825	0.425826
P78371	CCT2	-0.279955	-0.163671	0.0749084	-1.04734	0.294945	0.425826
P80404	ABAT	0.277277	-0.0145406	-0.38745	1.04587	0.295621	0.426418
Q9Y2L5	TRAPPC8	-0.281741	-0.160918	0.11863	-1.04489	0.296076	0.426689
Q96BM9	ARL8A	-0.283521	-0.110122	0.0276847	-1.04412	0.296433	0.426821
Q8IWT6	LRRC8A	-0.278468	-0.120924	0.18208	-1.04021	0.298245	0.429044
Q05084	ICA1	-0.282912	-0.184298	0.0320805	-1.03358	0.301335	0.433023
Q9Y2A7	NCKAP1	-0.273904	-0.197448	0.0823164	-1.03264	0.301775	0.433023
P56181	NDUFV3	-0.274649	-0.124497	0.153281	-1.03254	0.30182	0.433023
P31946	YWHAB	0.272563	0.0203389	-0.334658	1.02682	0.304509	0.43649
Q9UKF7	PITPNC1	0.272149	0.0170293	-0.344672	1.02583	0.304971	0.436762
Q330K2	NDUFAF6	-0.276595	-0.149404	0.0907231	-1.02454	0.305581	0.43686
Q14694	USP10	-0.277348	-0.185498	0.0966248	-1.02453	0.305584	0.43686
Q99832	CCT7	-0.273261	-0.182718	0.0531988	-1.023	0.30631	0.437119
Q9NZ45	CISD1	-0.27408	-0.109541	0.172333	-1.023	0.306311	0.437119
P08574	CYC1	-0.277362	-0.144548	0.0855481	-1.02205	0.30676	0.437372
A0FGR8	ESYT2	-0.273391	-0.181857	-0.00130626	-1.01836	0.308509	0.439475
P11498	PC	-0.268474	-0.216491	0.0249698	-1.01286	0.31113	0.442758
Q9Y2Q0	ATP8A1	0.268899	-0.0430088	-0.356477	1.01236	0.311366	0.442758
Q9UI12	ATP6V1H	-0.269011	-0.1866	0.0575722	-1.01166	0.3117	0.44284
P11586	MTHFD1	-0.2702	-0.183271	0.0247963	-1.00893	0.313012	0.44431
P48444	ARCN1	-0.266913	-0.144691	-0.00715045	-1.00712	0.313879	0.445118
Q9UM22	EPDR1	-0.266875	-0.215041	-0.0114681	-1.00658	0.314136	0.445118
P17568	NDUFB7	-0.266888	-0.101999	0.119326	-1.00557	0.314622	0.445189
Q13526	PIN1	-0.273308	-0.135279	0.0631292	-1.00427	0.31525	0.445189
P03886	MT-ND1	-0.267041	-0.12177	0.13929	-1.00406	0.315352	0.445189
Q9Y490	TLN1	-0.269348	-0.128521	0.0354304	-1.00346	0.315639	0.445189
P49840	GSK3A	-0.26857	-0.163198	0.0368696	-1.00318	0.315775	0.445189
Q8TC12	RDH11	-0.270206	-0.171961	0.0670711	-1.00302	0.315851	0.445189
P31146	CORO1A	0.271567	-0.0393307	-0.431003	1.00063	0.317006	0.446232
O15530	PDPK1	-0.267495	-0.17643	-0.00464644	-1.00034	0.317147	0.446232
O00471	EXOC5	-0.265627	-0.191615	0.0103989	-0.999249	0.317675	0.446323
O00764	PDXK	0.268465	-0.0113541	-0.34606	0.998542	0.318018	0.446323
Q8N1B4	VPS52	-0.266063	-0.149584	0.0470318	-0.998294	0.318138	0.446323
O75368	SH3BGRL	-0.265503	-0.0885023	0.0537063	-0.997908	0.318325	0.446323
O43175	PHGDH	0.264809	0.00175224	-0.359853	0.996067	0.319219	0.447185
P46109	CRKL	0.264439	0.0230329	-0.41925	0.995443	0.319522	0.447219
P21397	MAOA	0.263928	0.041799	-0.127474	0.994435	0.320012	0.447338
Q14204	DYNC1H1	-0.264134	-0.197163	0.0498942	-0.994123	0.320164	0.447338
O60890	OPHN1	-0.26877	-0.143413	0.0452473	-0.992869	0.320775	0.447801
Q9NVJ2	ARL8B	-0.265072	-0.149018	0.0443187	-0.991568	0.32141	0.448297
P49821	NDUFV1	-0.267412	-0.181726	0.0580784	-0.989924	0.322213	0.449026
P62070	RRAS2	-0.263206	-0.125308	0.107555	-0.989164	0.322584	0.449153
P51648	ALDH3A2	-0.263267	-0.150857	-0.031916	-0.987086	0.323602	0.45018
Q14643	ITPR1	-0.260812	-0.181765	0.0413069	-0.980903	0.326642	0.454015
P61160	ACTR2	-0.265294	-0.149129	0.0348511	-0.979606	0.327282	0.454511
P19404	NDUFV2	-0.260224	-0.16502	0.0930815	-0.978665	0.327747	0.454763
Q504Y0	SLC39A12	0.259953	-0.0804666	-0.505504	0.976856	0.328642	0.455298
P21283	ATP6V1C1	-0.259479	-0.187426	0.0543859	-0.976738	0.3287	0.455298
P27338	MAOB	-0.259244	-0.166505	0.0603932	-0.975882	0.329124	0.45532
Q13423	NNT	0.25868	-0.016841	-0.339623	0.975559	0.329284	0.45532
Q8TD22	SFXN5	-0.269437	-0.0929226	0.198798	-0.974235	0.329941	0.455606
P43155	CRAT	-0.261065	-0.176358	0.0216217	-0.973998	0.330059	0.455606
Q9UPR5	SLC8A2	-0.257865	-0.168228	0.0372267	-0.972356	0.330875	0.45634
Q9P260	RELCH	-0.258031	-0.188269	0.00650734	-0.97153	0.331286	0.456514
Q99259	GAD1	0.256584	-0.0273196	-0.324539	0.964998	0.334547	0.460504
P41252	IARS1	-0.260832	-0.223513	-0.00320915	-0.964583	0.334755	0.460504
Q96DA2	RAB39B	-0.259406	-0.130528	0.0669964	-0.963499	0.335299	0.460856
Q16204	CCDC6	0.263805	-0.0545628	-0.387335	0.962812	0.335643	0.460935
O14531	DPYSL4	-0.254485	-0.210944	0.00726805	-0.958995	0.337563	0.462341
P27348	YWHAQ	0.254253	0.00817399	-0.355173	0.95893	0.337595	0.462341
O15145	ARPC3	-0.255554	-0.103745	0.0125135	-0.958515	0.337804	0.462341
P09972	ALDOC	-0.254013	-0.12772	-0.032024	-0.958484	0.33782	0.462341
Q15119	PDK2	-0.256219	-0.15542	0.0046048	-0.957449	0.338342	0.46266
P49418	AMPH	0.255572	-0.00913128	-0.299169	0.956748	0.338695	0.462749
O95298	NDUFC2	-0.260772	-0.16049	0.0639888	-0.954871	0.339644	0.46365
P50583	NUDT2	0.252578	0.0153888	-0.281083	0.952917	0.340633	0.464605
Q16623	STX1A	-0.252013	-0.111949	0.0668989	-0.948206	0.343026	0.467432
Q8WY22	BRI3BP	-0.257454	-0.04692	0.143637	-0.947443	0.343414	0.467432
O95169	NDUFB8	-0.251352	-0.134221	0.107804	-0.947118	0.34358	0.467432
Q13636	RAB31	-0.260646	-0.122345	0.075053	-0.944918	0.344702	0.468561
Q9UIJ7	AK3	-0.25305	-0.0721268	0.0714473	-0.943601	0.345375	0.469078
Q96L92	SNX27	-0.251691	-0.182992	0.00850594	-0.929778	0.352487	0.478333
Q15185	PTGES3	-0.246331	-0.131382	0.0391675	-0.928565	0.353116	0.478781
O95741	CPNE6	-0.245983	-0.18724	-0.00724127	-0.924079	0.355446	0.480903
Q96FZ7	CHMP6	-0.249593	-0.117198	0.0136265	-0.923306	0.355849	0.480903
P43378	PTPN9	-0.253315	-0.212405	0.139876	-0.923262	0.355872	0.480903
P53680	AP2S1	-0.247955	-0.132494	0.0632024	-0.922816	0.356104	0.480903
P17302	GJA1	0.245281	-0.0369749	-0.187721	0.922671	0.35618	0.480903
Q99250	SCN2A	-0.245392	-0.198537	0.0382665	-0.919557	0.357805	0.482691
P63104	YWHAZ	0.244226	0.0042928	-0.313277	0.918756	0.358224	0.48285
Q9Y3E7	CHMP3	-0.249723	-0.0689881	0.0723509	-0.917737	0.358758	0.483163
P51809	VAMP7	0.244569	-0.00259171	-0.374385	0.91671	0.359296	0.483482
P32004	L1CAM	0.246997	0.0536577	-0.280429	0.915528	0.359916	0.48391
P40926	MDH2	-0.242781	-0.143108	0.0347175	-0.913786	0.36083	0.484734
O14807	MRAS	-0.242009	-0.0749474	0.141356	-0.913092	0.361195	0.484818
P51570	GALK1	-0.245688	-0.159223	0.0401476	-0.911827	0.361861	0.484904
Q15046	KARS1	0.246414	-0.0508168	-0.377774	0.910703	0.362453	0.484904
P50991	CCT4	-0.241451	-0.157637	0.0255356	-0.91023	0.362703	0.484904
P15311	EZR	-0.244482	-0.141946	-0.078127	-0.909866	0.362894	0.484904
P29401	TKT	0.244778	0.0208658	-0.319175	0.909787	0.362936	0.484904
P21281	ATP6V1B2	-0.241206	-0.181424	0.050079	-0.909526	0.363073	0.484904
P56134	ATP5MF	-0.246296	-0.109686	0.13991	-0.907726	0.364024	0.48556
Q6IBS0	TWF2	0.241267	0.0152102	-0.318305	0.90745	0.36417	0.48556
Q16643	DBN1	0.240345	-0.0410513	-0.326015	0.906396	0.364727	0.485899
P27824	CANX	0.239761	0.00913277	-0.361979	0.904114	0.365936	0.487105
Q9H9A6	LRRC40	0.23977	-0.0447828	-0.345609	0.901006	0.367586	0.488896
Q8WWC4	MAIP1	0.238785	-0.0350234	-0.392554	0.899692	0.368285	0.48942
O75116	ROCK2	0.238253	-0.0195459	-0.291904	0.898808	0.368756	0.48964
Q16718	NDUFA5	-0.237929	-0.159364	0.0136972	-0.89543	0.370559	0.491626
Q9NUB1	ACSS1	0.239407	-0.0257904	-0.328107	0.89351	0.371585	0.492581
P09669	COX6C	-0.234369	-0.135129	-0.00821219	-0.881487	0.378056	0.500684
Q9Y450	HBS1L	-0.23882	-0.144575	0.019752	-0.880994	0.378322	0.500684
Q9H0R4	HDHD2	-0.235794	-0.114125	0.0291381	-0.877583	0.380171	0.502535
Q5VIR6	VPS53	-0.236922	-0.181157	0.022506	-0.877258	0.380347	0.502535
Q9UPT5	EXOC7	-0.232925	-0.183295	-0.0231332	-0.875559	0.381271	0.502833
O43615	TIMM44	0.235712	-0.0134698	-0.390903	0.875198	0.381467	0.502833
Q13155	AIMP2	0.233896	-0.0315322	-0.335944	0.875113	0.381513	0.502833
Q9BWS9	CHID1	-0.238819	-0.215939	0.0807002	-0.873152	0.382581	0.503826
Q5T4S7	UBR4	-0.231184	-0.182342	0.0492652	-0.870795	0.383867	0.505105
Q99873	PRMT1	0.233591	-0.0200107	-0.351146	0.867164	0.385853	0.507302
Q9UEY8	ADD3	-0.232801	-0.118642	0.00910857	-0.865653	0.386682	0.507763
Q8TCJ2	STT3B	-0.233358	-0.0859969	0.146687	-0.86537	0.386837	0.507763
Q9BT78	COPS4	0.229968	0.015964	-0.333885	0.86342	0.387907	0.508752
Q9UBC2	EPS15L1	-0.228758	-0.15281	-0.00274742	-0.858694	0.39051	0.511747
Q9UBS5	GABBR1	-0.226029	-0.157722	0.119136	-0.851128	0.3947	0.516815
O75083	WDR1	0.226314	-0.00708472	-0.33482	0.850291	0.395164	0.517001
O75044	SRGAP2	-0.22655	-0.166793	0.0255659	-0.847179	0.396896	0.518844
Q9ULH1	ASAP1	-0.224505	-0.181963	0.0310335	-0.844872	0.398183	0.520093
P19338	NCL	-0.22421	-0.0808334	0.0647066	-0.844305	0.3985	0.520093
P51970	NDUFA8	-0.227739	-0.105477	0.0817823	-0.842691	0.399402	0.520847
Q7L1Q6	BZW1	0.228504	0.0359145	-0.328187	0.841238	0.400216	0.521135
P59998	ARPC4	-0.225369	-0.13317	-0.0161108	-0.841136	0.400273	0.521135
Q00610	CLTC	0.222481	-0.0140577	-0.279986	0.839398	0.401247	0.521979
P17987	TCP1	-0.221505	-0.167633	0.00555624	-0.83348	0.404575	0.525882
P22626	HNRNPA2B1	-0.221338	-0.0898167	-0.000396857	-0.832743	0.404991	0.525996
P62258	YWHAE	0.22009	0.0086817	-0.287456	0.825841	0.408895	0.530637
Q92747	ARPC1A	-0.221881	-0.158416	-0.0167908	-0.823135	0.410433	0.532202
Q15811	ITSN1	-0.219245	-0.169836	-0.0169805	-0.821609	0.4113	0.532896
P17858	PFKL	-0.217589	-0.184662	0.0223941	-0.818933	0.412826	0.534441
O94973	AP2A2	-0.220163	-0.180559	0.00490111	-0.81737	0.413718	0.535164
Q9UJU6	DBNL	0.218983	-0.0343479	-0.363649	0.816504	0.414213	0.535372
P40121	CAPG	0.219882	-0.0250126	-0.320568	0.814978	0.415086	0.535902
Q96JG6	VPS50	-0.219017	-0.178296	-0.0170934	-0.81462	0.415291	0.535902
Q9NRG7	SDR39U1	0.219412	-0.0234847	-0.372513	0.814019	0.415635	0.535915
Q13332	PTPRS	-0.215417	-0.0779144	0.0492987	-0.812784	0.416343	0.536358
P53779	MAPK10	-0.215399	-0.169038	-0.0197511	-0.812253	0.416647	0.536358
Q8TB36	GDAP1	-0.220499	-0.145244	0.0836423	-0.809921	0.417986	0.53765
Q9H2G2	SLK	-0.215738	-0.129386	0.047724	-0.806464	0.419976	0.539777
O00217	NDUFS8	-0.218527	-0.1171	0.0770508	-0.805289	0.420654	0.540215
Q13596	SNX1	-0.219854	-0.130272	-0.0292216	-0.803129	0.421901	0.541383
O15020	SPTBN2	-0.212618	-0.177361	-0.0463645	-0.801468	0.422862	0.542183
Q14974	KPNB1	0.212928	-0.0320371	-0.364893	0.799639	0.423921	0.543106
P35612	ADD2	-0.212113	-0.10776	0.0265017	-0.798368	0.424658	0.543616
O00499	BIN1	-0.211368	-0.117306	-0.0204558	-0.797277	0.425291	0.543993
Q13613	MTMR1	-0.212422	-0.193962	-0.0308145	-0.79607	0.425992	0.544073
P0CG08	GPR89B	-0.211542	-0.174722	0.0582394	-0.795574	0.426281	0.544073
P10909	CLU	0.211862	0.0663128	-0.27506	0.795418	0.426371	0.544073
Q9NYI0	PSD3	-0.209934	-0.140246	0.0166688	-0.792064	0.428324	0.545733
Q9P2R3	ANKFY1	-0.21027	-0.150984	0.0193732	-0.792015	0.428353	0.545733
Q9GZT4	SRR	-0.209696	-0.0656373	0.0628419	-0.790797	0.429063	0.545857
P51798	CLCN7	-0.215014	-0.176648	-0.00811249	-0.790682	0.429131	0.545857
Q9H4G0	EPB41L1	-0.211074	-0.163656	0.0049639	-0.790005	0.429526	0.545927
P42704	LRPPRC	-0.208839	-0.189969	-0.0274596	-0.787181	0.431177	0.547592
Q9UH65	SWAP70	0.20859	0.0028225	-0.377793	0.784685	0.432639	0.548746
P60709	ACTB	-0.207925	-0.145336	-0.0193122	-0.78367	0.433235	0.548746
Q684P5	RAP1GAP2	-0.211324	-0.180937	-0.0341571	-0.783439	0.433371	0.548746
P06730	EIF4E	-0.211678	-0.116937	-0.0757145	-0.783296	0.433454	0.548746
O95782	AP2A1	-0.208738	-0.177394	0.0229097	-0.781967	0.434235	0.5493
Q9NP81	SARS2	0.207159	-0.0676759	-0.353968	0.780568	0.435058	0.549908
P51114	FXR1	-0.210596	-0.125217	0.0359513	-0.777809	0.436683	0.551527
Q9H0Q0	CYRIA	0.20832	-0.0242953	-0.307252	0.776565	0.437417	0.551855
P28482	MAPK1	-0.20717	-0.113328	0.0118645	-0.775961	0.437773	0.551855
O94817	ATG12	0.206092	-0.0471739	-0.330667	0.77562	0.437974	0.551855
P48426	PIP4K2A	-0.206028	-0.128519	-0.114006	-0.773877	0.439005	0.552719
Q16658	FSCN1	0.205049	0.0281983	-0.343404	0.772832	0.439623	0.553063
Q96F07	CYFIP2	-0.204625	-0.185072	0.0617258	-0.771283	0.44054	0.553783
Q4J6C6	PREPL	0.205462	0.00982084	-0.3185	0.77046	0.441028	0.553962
P50148	GNAQ	-0.208588	-0.104622	0.00630237	-0.76938	0.441668	0.554332
P49841	GSK3B	-0.205979	-0.161431	0.0920759	-0.764589	0.444517	0.557471
Q12906	ILF3	-0.205397	-0.100272	0.0349488	-0.761291	0.446484	0.559501
P62140	PPP1CB	-0.203751	-0.144878	-0.0341813	-0.759073	0.44781	0.560534
Q9NRD5	PICK1	-0.205276	-0.183217	0.013179	-0.758742	0.448008	0.560534
P62195	PSMC5	-0.203501	-0.140399	-0.0271725	-0.756206	0.449527	0.561559
P16615	ATP2A2	0.200927	-0.0474444	-0.319835	0.756205	0.449527	0.561559
Q8NF37	LPCAT1	0.2001	-0.0416934	-0.285483	0.754492	0.450555	0.562099
Q15365	PCBP1	-0.200295	-0.150058	-0.0669924	-0.754316	0.45066	0.562099
Q14141	SEPTIN6	-0.200259	-0.174766	-0.0209123	-0.751653	0.452261	0.563657
Q15349	RPS6KA2	0.19982	-0.0226329	-0.298546	0.750118	0.453184	0.564369
O75170	PPP6R2	-0.202911	-0.188385	-0.00800298	-0.74949	0.453563	0.564402
P17980	PSMC3	-0.198661	-0.171075	-0.0284423	-0.746882	0.455136	0.565921
Q8N6H7	ARFGAP2	-0.200911	-0.0761356	0.0325115	-0.745874	0.455745	0.566104
Q9Y6M9	NDUFB9	-0.20026	-0.105675	0.0824317	-0.745454	0.455999	0.566104
Q86TV6	TTC7B	-0.198634	-0.146243	0.0534747	-0.744885	0.456342	0.566104
O95372	LYPLA2	0.19757	-0.031284	-0.304143	0.743805	0.456995	0.566397
Q9BTV5	FSD1	0.199682	-0.014683	-0.300594	0.741733	0.45825	0.566397
Q92572	AP3S1	0.196849	-0.01345	-0.329166	0.741715	0.458261	0.566397
Q9UHV9	PFDN2	-0.196771	-0.13349	0.00356071	-0.741683	0.45828	0.566397
P78527	PRKDC	-0.19905	-0.159517	0.0894385	-0.741579	0.458343	0.566397
Q6UW68	TMEM205	0.201626	0.00695491	-0.16709	0.740729	0.458859	0.566597
Q9GZZ9	UBA5	-0.200019	-0.110872	-0.0752384	-0.738884	0.459978	0.567542
P54886	ALDH18A1	-0.198895	-0.127234	-0.0234272	-0.738264	0.460355	0.567571
Q3SXM5	HSDL1	-0.194153	-0.152878	0.02525	-0.732177	0.464061	0.571701
P62826	RAN	0.195266	0.0169456	-0.291121	0.731449	0.464506	0.571809
Q9Y4G6	TLN2	-0.194403	-0.18737	-0.0475645	-0.730542	0.46506	0.572017
Q86XE0	SNX32	-0.193788	-0.235289	0.0589957	-0.730005	0.465388	0.572017
O94811	TPPP	-0.193467	-0.1477	-0.0656451	-0.728132	0.466534	0.572986
Q86Y82	STX12	-0.194328	-0.0796987	0.0257013	-0.725943	0.467874	0.574193
Q9H4M9	EHD1	0.191539	-0.00835149	-0.321063	0.72259	0.469933	0.576278
Q6PIU2	NCEH1	0.190906	0.0098494	-0.288032	0.715095	0.474551	0.581497
Q13619	CUL4A	-0.189748	-0.147291	-0.0568441	-0.709131	0.478244	0.585575
O95202	LETM1	-0.190518	-0.0915554	0.102271	-0.707908	0.479004	0.586003
P16152	CBR1	0.189271	0.0164025	-0.358557	0.707391	0.479324	0.586003
Q15436	SEC23A	-0.187083	-0.150844	-0.0216786	-0.703065	0.482016	0.588845
Q9UID3	VPS51	-0.186521	-0.16081	0.0576808	-0.700695	0.483494	0.590202
O95248	SBF1	-0.18562	-0.187796	0.00556195	-0.698385	0.484937	0.591513
P15882	CHN1	-0.18678	-0.109441	-0.0519103	-0.692545	0.488596	0.595522
Q9NP97	DYNLRB1	-0.183064	-0.0675254	0.030181	-0.690506	0.489877	0.596631
Q14344	GNA13	-0.184149	-0.0960161	-0.026752	-0.688791	0.490956	0.597125
Q15056	EIF4H	0.187025	-0.00994545	-0.287753	0.688676	0.491028	0.597125
Q9BPW8	NIPSNAP1	0.182977	-0.0453455	-0.203238	0.687288	0.491902	0.597735
Q9H3Q1	CDC42EP4	-0.186063	-0.0763322	-0.0544035	-0.685275	0.493171	0.598824
Q9UNA1	ARHGAP26	-0.185411	-0.175875	-0.0282641	-0.684532	0.49364	0.59894
P63027	VAMP2	-0.184609	-0.105141	-0.0047577	-0.682138	0.495152	0.600321
P51553	IDH3G	0.181069	-0.0502066	-0.289265	0.6806	0.496126	0.600762
O00232	PSMD12	-0.182248	-0.135053	-0.0198154	-0.680379	0.496265	0.600762
P55010	EIF5	0.179675	0.0172351	-0.299709	0.677924	0.497821	0.60219
Q9ULD0	OGDHL	-0.179793	-0.197916	-0.0480517	-0.675355	0.499451	0.603707
Q07955	SRSF1	-0.178067	-0.122281	-0.00829969	-0.662176	0.507859	0.613124
P56385	ATP5ME	-0.178202	-0.0631158	0.0445024	-0.661947	0.508006	0.613124
Q16555	DPYSL2	-0.175146	-0.15228	-0.0622888	-0.660882	0.508689	0.613486
Q9UN86	G3BP2	-0.179359	-0.0998999	0.0287775	-0.660141	0.509164	0.613598
O75689	ADAP1	-0.181676	-0.171585	-0.117029	-0.659452	0.509606	0.61367
O43432	EIF4G3	0.174883	-0.12382	-0.362307	0.657788	0.510675	0.614496
Q9NQP4	PFDN4	-0.17916	-0.104853	0.039834	-0.653052	0.513724	0.617701
Q92905	COPS5	0.172246	0.000812347	-0.331663	0.649905	0.515754	0.619678
Q9H0E2	TOLLIP	0.171982	-0.0103808	-0.32042	0.648959	0.516365	0.619814
P84077	ARF1	-0.173732	-0.0663787	-0.0204718	-0.648534	0.51664	0.619814
Q9H330	TMEM245	0.175366	0.0532492	-0.101948	0.647786	0.517124	0.619931
O95168	NDUFB4	-0.172574	-0.128476	0.0184196	-0.646357	0.518049	0.620576
P00533	EGFR	-0.171872	-0.173024	-0.00701111	-0.643783	0.519717	0.622109
Q9H078	CLPB	-0.170704	-0.0796161	0.0189158	-0.643129	0.520141	0.622152
Q9Y4L1	HYOU1	0.170652	0.0143592	-0.255422	0.642432	0.520593	0.622229
P36776	LONP1	0.169423	-0.0893674	-0.338315	0.638739	0.522993	0.624633
O96011	PEX11B	-0.170594	-0.117172	0.0712619	-0.632856	0.526828	0.628288
P21266	GSTM3	0.169027	0.00467502	-0.321427	0.632669	0.52695	0.628288
O15144	ARPC2	-0.167963	-0.064359	0.0336909	-0.632242	0.527229	0.628288
Q01484	ANK2	-0.166449	-0.176643	-0.0137272	-0.626775	0.530808	0.632083
Q9P2J5	LARS1	-0.164468	-0.166676	-0.016452	-0.617214	0.537094	0.638486
P62333	PSMC6	-0.165567	-0.181313	-0.058414	-0.617157	0.537132	0.638486
Q02218	OGDH	-0.163727	-0.195262	-0.0339902	-0.616782	0.537379	0.638486
Q8WUY1	THEM6	-0.164998	-0.0774767	0.0193771	-0.614167	0.539106	0.639716
Q9H4B0	OSGEPL1	-0.165032	-0.153363	-0.0475601	-0.614007	0.539212	0.639716
Q15173	PPP2R5B	-0.166031	-0.136568	-0.0622416	-0.613385	0.539622	0.63973
Q9NZN3	EHD3	0.162835	-0.0217315	-0.306404	0.612361	0.540299	0.640059
P04844	RPN2	-0.165836	-0.103421	-0.0136682	-0.610486	0.54154	0.641056
P23763	VAMP1	0.161286	0.0492407	-0.258027	0.598607	0.549436	0.649825
P42356	PI4KA	-0.158531	-0.189108	-0.00820699	-0.598123	0.549758	0.649825
Q9H9B4	SFXN1	-0.159692	-0.059796	0.157864	-0.597006	0.550504	0.650227
Q13363	CTBP1	-0.157577	-0.0616409	0.0426714	-0.592313	0.553642	0.653452
O43678	NDUFA2	-0.156423	-0.131011	-0.0276178	-0.59018	0.555071	0.654364
Q92932	PTPRN2	-0.157712	-0.161684	-0.0467537	-0.589942	0.555231	0.654364
O95674	CDS2	-0.162451	-0.0448344	0.148709	-0.584937	0.558591	0.657841
O00186	STXBP3	-0.154354	-0.134579	-0.072502	-0.582386	0.560307	0.659319
P48556	PSMD8	-0.155625	-0.15018	-0.083105	-0.581851	0.560668	0.659319
Q96PE3	INPP4A	0.153646	-0.0993837	-0.275264	0.575553	0.564918	0.66383
Q6YP21	KYAT3	0.15614	-0.0153587	-0.236202	0.574463	0.565655	0.664123
Q13501	SQSTM1	0.152129	0.00627099	-0.281717	0.573961	0.565995	0.664123
P23297	S100A1	-0.153513	-0.0855853	-0.0176353	-0.572418	0.56704	0.664862
Q96CW1	AP2M1	-0.151149	-0.147791	-0.0162243	-0.568518	0.569684	0.667475
Q07960	ARHGAP1	-0.150922	-0.0753006	0.0015694	-0.566597	0.570988	0.668515
O43583	DENR	-0.151476	-0.143045	-0.0647403	-0.5616	0.574389	0.671642
Q02153	GUCY1B1	-0.149205	-0.145565	0.00319833	-0.561442	0.574497	0.671642
Q9Y3A3	MOB4	-0.148355	-0.111922	-0.0807104	-0.559773	0.575635	0.672399
P34897	SHMT2	-0.148423	-0.155258	-0.015076	-0.559264	0.575982	0.672399
P01034	CST3	-0.14932	-0.012313	0.00898483	-0.557059	0.577488	0.673666
Q99460	PSMD1	-0.147726	-0.176147	-0.062417	-0.554554	0.5792	0.675173
Q9Y320	TMX2	0.14524	-0.0680537	-0.24243	0.546824	0.584501	0.680503
Q8WUM4	PDCD6IP	0.145897	-0.0396837	-0.291839	0.546648	0.584621	0.680503
Q86VU5	COMTD1	-0.149241	-0.188676	-0.130566	-0.542869	0.587221	0.682949
Q9UQ80	PA2G4	-0.144275	-0.10841	-0.0814336	-0.542209	0.587675	0.682949
Q86TP1	PRUNE1	-0.146179	-0.146855	-0.013691	-0.541736	0.588001	0.682949
O00408	PDE2A	0.142303	-0.0903718	-0.250218	0.535202	0.592511	0.68769
P61088	UBE2N	0.142483	0.025229	-0.260553	0.53451	0.59299	0.687748
P11021	HSPA5	-0.14121	-0.0659937	-0.0282369	-0.532585	0.594321	0.688794
P07954	FH	0.142011	-0.00503095	-0.269229	0.530142	0.596014	0.690258
P62191	PSMC1	-0.142046	-0.143779	-0.0955736	-0.52493	0.599633	0.693947
Q00577	PURA	-0.139088	-0.116429	-0.0462635	-0.522468	0.601345	0.695427
Q9BPX5	ARPC5L	-0.13981	-0.0477789	-0.0212486	-0.521706	0.601876	0.69554
P49748	ACADVL	-0.137955	-0.121611	0.0385986	-0.519488	0.603421	0.696504
Q9H8H3	METTL7A	0.143499	-0.0244111	-0.241899	0.519262	0.603579	0.696504
Q9Y639	NPTN	-0.137291	-0.0641231	-0.00650699	-0.517982	0.604472	0.696566
O60381	HBP1	-0.139624	-0.14875	-0.110017	-0.51794	0.604501	0.696566
Q99733	NAP1L4	0.139969	0.000207807	-0.310983	0.515756	0.606025	0.697821
Q13232	NME3	-0.137014	-0.117996	-0.0436095	-0.514244	0.607082	0.698536
Q8N9R8	SCAI	0.136851	-0.0735128	-0.272856	0.511281	0.609155	0.700419
P09382	LGALS1	0.134763	0.00445536	-0.244309	0.507152	0.612049	0.703242
Q96SW2	CRBN	-0.134344	-0.18162	-0.0848567	-0.505432	0.613256	0.704125
Q8N6D5	ANKRD29	-0.133553	-0.0474053	-0.0422534	-0.502017	0.615656	0.706375
Q3ZCQ8	TIMM50	-0.132235	-0.0728068	-0.116073	-0.498151	0.618379	0.708992
P14868	DARS1	-0.132065	-0.121797	-0.0826242	-0.496105	0.619821	0.709871
Q96MC5	BMERB1	-0.131511	-0.143606	-0.133421	-0.495807	0.620031	0.709871
P49589	CARS1	0.132667	-0.0330392	-0.242481	0.493034	0.621989	0.711605
Q9NRZ7	AGPAT3	-0.131766	-0.163551	-0.0982004	-0.489585	0.624428	0.713887
O75380	NDUFS6	-0.13282	-0.0935921	0.0254593	-0.488666	0.625079	0.714121
P42765	ACAA2	-0.129812	-0.0893761	-0.0263096	-0.480179	0.631101	0.720488
P61201	COPS2	0.128529	-0.0215028	-0.298596	0.477243	0.63319	0.722359
Q96P70	IPO9	-0.125236	-0.147604	-0.0626104	-0.471135	0.637545	0.72681
Q8N5K1	CISD2	-0.125078	-0.0508989	0.0364478	-0.46827	0.639592	0.728626
Q9H479	FN3K	-0.125016	-0.132077	-0.0701282	-0.463205	0.643218	0.731897
P61266	STX1B	-0.124891	-0.0627319	-0.0389695	-0.462984	0.643376	0.731897
Q9Y263	PLAA	-0.123901	-0.130637	-0.124279	-0.461192	0.644661	0.73284
P48735	IDH2	0.123467	-0.0892216	-0.253689	0.460269	0.645323	0.733073
Q93009	USP7	0.120865	-0.0756	-0.288406	0.448557	0.653752	0.742122
P61163	ACTR1A	-0.118868	-0.0997463	-0.107852	-0.446179	0.655469	0.742875
P55039	DRG2	-0.118207	-0.116367	-0.101559	-0.446032	0.655575	0.742875
P53992	SEC24C	-0.118128	-0.127102	-0.0849399	-0.445714	0.655805	0.742875
P51991	HNRNPA3	-0.118189	-0.121642	-0.0298616	-0.444476	0.656699	0.743363
P37840	SNCA	0.117312	0.0429642	-0.15215	0.442219	0.658332	0.744685
Q96N66	MBOAT7	-0.116093	-0.118159	0.0473651	-0.435302	0.663344	0.749826
P13639	EEF2	-0.113366	-0.118654	-0.0417727	-0.424759	0.671013	0.757817
Q9Y6F6	IRAG1	-0.112468	-0.0430592	-0.051371	-0.424285	0.671358	0.757817
A0MZ66	SHTN1	-0.111661	-0.0943362	-0.123116	-0.421338	0.673508	0.75971
Q53FP2	TMEM35A	-0.111521	-0.0535449	-0.019182	-0.419001	0.675216	0.761101
Q9H115	NAPB	-0.111398	-0.0812642	-0.0962711	-0.416899	0.676753	0.762298
P31153	MAT2A	-0.110689	-0.0860646	-0.175322	-0.414932	0.678192	0.763382
Q147X3	NAA30	0.111002	-0.103968	-0.283701	0.414057	0.678833	0.763568
P43686	PSMC4	-0.109999	-0.12922	-0.129684	-0.412671	0.679848	0.764174
Q9Y697	NFS1	0.109202	-0.0384065	-0.239891	0.408671	0.682781	0.766749
O43920	NDUFS5	-0.10821	-0.0896987	-0.0178541	-0.408244	0.683095	0.766749
P30153	PPP2R1A	0.10904	-0.0542198	-0.264892	0.404138	0.686112	0.769597
Q16401	PSMD5	0.106547	-0.0874974	-0.247774	0.401546	0.688018	0.770865
Q9BR76	CORO1B	0.107931	-0.0320402	-0.282304	0.401295	0.688203	0.770865
Q86UW8	HAPLN4	-0.106189	-0.10178	0.0445312	-0.396904	0.691439	0.773948
P68400	CSNK2A1	-0.106974	-0.0577783	-0.0952672	-0.395294	0.692626	0.774737
P63151	PPP2R2A	-0.105656	-0.103826	-0.0706861	-0.39213	0.694962	0.776339
P55036	PSMD4	-0.104497	-0.111753	-0.11466	-0.392043	0.695027	0.776339
O94819	KBTBD11	-0.104513	-0.143664	-0.0883969	-0.390496	0.69617	0.777075
Q92973	TNPO1	0.10309	-0.0798092	-0.272745	0.383066	0.701671	0.782671
P53396	ACLY	0.100907	-0.0386844	-0.202509	0.378321	0.705193	0.786052
O00139	KIF2A	-0.0999726	-0.163728	-0.0914703	-0.376427	0.7066	0.787074
Q9BQE5	APOL2	-0.0986228	-0.0665695	-0.0281551	-0.371186	0.7105	0.790598
Q8WVJ2	NUDCD2	0.0982932	-0.0135929	-0.277026	0.37085	0.71075	0.790598
Q9NNW7	TXNRD2	-0.0978106	-0.131584	-0.07977	-0.368926	0.712183	0.791273
P46977	STT3A	-0.101347	-0.106904	-0.0797494	-0.368712	0.712343	0.791273
O00487	PSMD14	-0.101033	-0.135633	-0.115849	-0.366413	0.714058	0.792629
O75396	SEC22B	-0.0956662	-0.0857573	-0.091772	-0.359872	0.718944	0.797132
P53621	COPA	-0.0959027	-0.157572	-0.0787912	-0.359651	0.719109	0.797132
O75915	ARL6IP5	-0.0951554	-0.00686349	0.0148818	-0.358941	0.719639	0.79717
Q10567	AP1B1	0.0964262	-0.0729302	-0.272158	0.355386	0.722301	0.799565
P49441	INPP1	0.0935289	-0.0261992	-0.266427	0.351657	0.725096	0.8016
P55786	NPEPPS	0.0934898	-0.00284271	-0.216559	0.3516	0.725138	0.8016
Q86W74	ANKRD46	0.0927357	-0.044469	-0.229712	0.349443	0.726757	0.802837
O94826	TOMM70	-0.0931975	-0.124651	-0.114451	-0.347056	0.72855	0.804263
P15104	GLUL	-0.09178	-0.048583	-0.0259138	-0.346196	0.729196	0.804423
P36405	ARL3	0.0925166	0.00695757	-0.261022	0.342811	0.731741	0.806675
Q05639	EEF1A2	-0.0923186	-0.12654	-0.13517	-0.342072	0.732297	0.806734
Q8WVM8	SCFD1	0.0907744	-0.0529922	-0.287256	0.337019	0.736103	0.81037
Q9BXF6	RAB11FIP5	-0.0910224	-0.150014	-0.121142	-0.335339	0.73737	0.810732
P20336	RAB3A	-0.0898379	-0.0613219	-0.0454779	-0.334943	0.737668	0.810732
P78356	PIP4K2B	-0.0888827	-0.136991	-0.138829	-0.334572	0.737948	0.810732
P17812	CTPS1	-0.0889764	-0.150714	-0.148635	-0.33087	0.740743	0.813246
O75964	ATP5MG	-0.0890141	-0.0816202	-0.00510365	-0.329817	0.741539	0.813562
O75061	DNAJC6	0.0867567	-0.075173	-0.239575	0.325942	0.744468	0.81577
P22102	GART	0.0860839	-0.0867837	-0.296715	0.323953	0.745974	0.81577
P45985	MAP2K4	0.0860142	-0.0611577	-0.282324	0.323567	0.746266	0.81577
P61978	HNRNPK	-0.0858334	-0.0740831	-0.125585	-0.323364	0.74642	0.81577
Q7Z3J2	VPS35L	0.0856596	-0.105034	-0.236888	0.323224	0.746526	0.81577
Q66LE6	PPP2R2D	-0.0857001	-0.0901038	-0.11554	-0.323123	0.746602	0.81577
O95757	HSPA4L	-0.086421	-0.13331	-0.18429	-0.318136	0.750382	0.819342
P54577	YARS1	0.0840148	-0.042481	-0.317342	0.316131	0.751903	0.820444
Q12756	KIF1A	-0.0831907	-0.137842	-0.0999219	-0.313115	0.754194	0.822126
P06756	ITGAV	-0.083697	-0.0709132	-0.0870358	-0.312424	0.754719	0.822126
Q9BSJ8	ESYT1	-0.0830186	-0.113363	-0.127409	-0.312077	0.754982	0.822126
Q8NC96	NECAP1	-0.084053	-0.135338	-0.0794878	-0.310412	0.756248	0.822211
P49588	AARS1	-0.0822372	-0.126589	-0.146796	-0.309998	0.756563	0.822211
O00231	PSMD11	-0.0828733	-0.113897	-0.127874	-0.309951	0.756598	0.822211
Q8N4Q0	ZADH2	-0.0831367	-0.114537	-0.128468	-0.308965	0.757349	0.82247
Q96KG9	SCYL1	0.0819508	-0.107806	-0.262648	0.306488	0.759233	0.823958
P29992	GNA11	-0.0812367	-0.112711	-0.126353	-0.302331	0.7624	0.826836
Q9BXM9	FSD1L	-0.0813044	-0.117267	-0.1177	-0.299216	0.764775	0.828851
Q9UJW0	DCTN4	-0.0793412	-0.106883	-0.143214	-0.296065	0.767181	0.830897
P78344	EIF4G2	-0.0781854	-0.113869	-0.1076	-0.293718	0.768973	0.831641
P84085	ARF5	-0.0797375	-0.01463	-0.0812345	-0.293435	0.76919	0.831641
P04792	HSPB1	-0.0783211	-0.0385573	-0.188162	-0.29313	0.769423	0.831641
Q15907	RAB11B	-0.0765333	-0.0315415	-0.102938	-0.287959	0.773378	0.835353
Q9Y2D4	EXOC6B	-0.076087	-0.14819	-0.130412	-0.286516	0.774483	0.835983
P53365	ARFIP2	0.0751534	-0.072811	-0.224762	0.279241	0.78006	0.841437
O14617	AP3D1	0.0748361	-0.11514	-0.221288	0.277715	0.781231	0.842134
O60610	DIAPH1	-0.0746608	-0.194181	-0.121814	-0.276922	0.78184	0.842224
P20020	ATP2B1	0.0730004	-0.0367513	-0.228315	0.275439	0.782979	0.842484
P27144	AK4	-0.0731495	-0.133326	-0.120392	-0.27524	0.783132	0.842484
Q08257	CRYZ	0.0729051	-0.051811	-0.14216	0.273225	0.784681	0.843584
Q13509	TUBB3	-0.0710656	-0.121816	-0.0472473	-0.267381	0.789176	0.847849
P62714	PPP2CB	0.0705157	-0.0830656	-0.258727	0.265176	0.790874	0.84834
P78417	GSTO1	0.071306	0.0368594	-0.231852	0.265111	0.790924	0.84834
Q9BY11	PACSIN1	-0.0716458	-0.0512785	0.00519955	-0.264728	0.79122	0.84834
Q9UQ03	CORO2B	-0.0698689	-0.124228	-0.111634	-0.263301	0.792319	0.848951
Q02410	APBA1	-0.0702549	-0.160118	-0.190624	-0.262382	0.793027	0.849143
Q8IYB5	SMAP1	0.0695406	-0.0665933	-0.229056	0.26162	0.793615	0.849205
Q13642	FHL1	-0.0672153	-0.0305176	0.101654	-0.249474	0.802994	0.858668
Q9NZW5	PALS2	0.0658573	-0.095099	-0.247578	0.246981	0.804923	0.860158
Q92561	PHYHIP	0.0650967	-0.0607627	-0.230736	0.244529	0.806822	0.861612
O15498	YKT6	-0.064122	-0.0580412	-0.132746	-0.241372	0.809267	0.863649
Q9NRW7	VPS45	-0.0630027	-0.115697	-0.128462	-0.237595	0.812195	0.866198
Q9Y281	CFL2	-0.0625872	-0.0377082	-0.163813	-0.234874	0.814307	0.867761
P07919	UQCRH	-0.0624582	-0.105424	-0.123944	-0.234312	0.814743	0.867761
Q9NRW1	RAB6B	0.0621724	0.0355377	-0.186077	0.230951	0.817353	0.869963
Q93008	USP9X	0.0613718	-0.108659	-0.232215	0.228401	0.819335	0.871196
Q92598	HSPH1	0.0605829	-0.0428952	-0.192768	0.228063	0.819598	0.871196
O43242	PSMD3	-0.0593315	-0.0985784	-0.111366	-0.223849	0.822875	0.874101
Q7L523	RRAGA	-0.0583178	-0.119706	-0.0798793	-0.218291	0.827203	0.878116
P47897	QARS1	0.05906	-0.0727033	-0.184143	0.215688	0.829231	0.879358
Q8N9F7	GDPD1	-0.0577174	-0.11212	-0.0970934	-0.215382	0.82947	0.879358
Q9UPY8	MAPRE3	0.0565402	-0.0351891	-0.240048	0.213302	0.831092	0.880496
Q6P2I7	EBLN2	0.0556892	-0.0256908	-0.110573	0.210139	0.83356	0.882528
Q8IZP0	ABI1	-0.05519	-0.0899292	-0.0553178	-0.208215	0.835061	0.883534
P00558	PGK1	-0.0549019	-0.0709226	-0.171087	-0.206706	0.83624	0.884183
O14949	UQCRQ	-0.0557965	-0.0442458	-0.00281012	-0.206019	0.836777	0.884183
P18433	PTPRA	0.052879	-0.0740412	-0.224641	0.197644	0.843324	0.890157
Q9NXU5	ARL15	0.052921	-0.0663136	-0.21815	0.19723	0.843648	0.890157
Q9NQC3	RTN4	-0.0521208	-0.0658171	-0.134116	-0.196658	0.844095	0.890157
P61981	YWHAG	0.0511865	-0.0180802	-0.181852	0.191924	0.847802	0.892791
Q9NTJ5	SACM1L	-0.0511839	-0.132092	-0.139857	-0.191706	0.847973	0.892791
O43681	GET3	0.0507079	-0.0638329	-0.215525	0.191336	0.848263	0.892791
Q9HCM2	PLXNA4	0.0505868	-0.0430303	-0.233671	0.187856	0.85099	0.895074
O43639	NCK2	-0.0501925	-0.0722315	-0.103686	-0.186885	0.851751	0.895104
Q86SX6	GLRX5	-0.0495474	-0.0631045	-0.145439	-0.186396	0.852134	0.895104
Q14194	CRMP1	-0.0491585	-0.106408	-0.110012	-0.185439	0.852885	0.895306
O60506	SYNCRIP	0.0486489	-0.0287961	-0.147921	0.181005	0.856364	0.89837
O60282	KIF5C	0.0467135	-0.0999103	-0.198001	0.175925	0.860353	0.901965
A0AVT1	UBA6	-0.0455351	-0.134048	-0.232697	-0.171767	0.863621	0.904799
Q9C040	TRIM2	0.0439593	-0.0373152	-0.192102	0.163632	0.870021	0.91091
Q14515	SPARCL1	-0.0427565	-0.048326	-0.107519	-0.161193	0.871941	0.911738
Q9Y2V2	CARHSP1	-0.0427313	-0.0969093	-0.129864	-0.16078	0.872267	0.911738
Q96NN9	AIFM3	0.0430856	-0.0441711	-0.161153	0.160462	0.872517	0.911738
Q9NX07	TRNAU1AP	-0.0429221	-0.113429	-0.00584411	-0.158927	0.873727	0.912407
P07237	P4HB	0.0410133	-0.0333705	-0.140845	0.154212	0.877442	0.914815
Q9H1E5	TMX4	-0.0415905	-0.120422	-0.197406	-0.154153	0.877489	0.914815
O43272	PRODH	-0.0415031	-0.122983	-0.104956	-0.153151	0.878279	0.914815
Q16799	RTN1	-0.0413289	-0.0705239	-0.141523	-0.153108	0.878313	0.914815
Q9HB71	CACYBP	-0.0408477	-0.0485963	-0.104615	-0.149138	0.881445	0.916795
O94760	DDAH1	0.0403723	-0.0206026	-0.228928	0.149099	0.881475	0.916795
Q13561	DCTN2	-0.0394476	-0.0314299	-0.156479	-0.148524	0.881929	0.916795
Q5T848	GPR158	0.0397071	-0.0639062	-0.0971089	0.146712	0.88336	0.917687
Q9UNM6	PSMD13	-0.0373344	-0.170185	-0.181131	-0.140527	0.888244	0.921882
O43837	IDH3B	0.0372367	-0.0571503	-0.209717	0.140143	0.888547	0.921882
Q9NSE4	IARS2	-0.0365942	-0.134377	-0.123076	-0.137495	0.890639	0.923456
Q8WXF7	ATL1	0.0363193	-0.0469146	-0.194179	0.136762	0.891219	0.92346
O76003	GLRX3	0.0356048	-0.0619649	-0.218812	0.13386	0.893513	0.925239
P99999	CYCS	-0.0357036	-0.0745081	-0.0714234	-0.131998	0.894986	0.926166
Q9NRP0	OSTC	-0.0350096	-0.102138	-0.125139	-0.128983	0.897371	0.928035
Q13367	AP3B2	0.0337699	-0.136249	-0.221896	0.126293	0.8995	0.929049
O60831	PRAF2	-0.034153	-0.0993977	-0.182161	-0.126282	0.899509	0.929049
Q14894	CRYM	0.033215	-0.0705724	-0.0606558	0.125106	0.90044	0.929411
P55209	NAP1L1	0.033014	-0.0501592	-0.221238	0.12386	0.901426	0.929831
O00410	IPO5	-0.0324669	-0.128619	-0.189721	-0.122111	0.902811	0.930661
Q15369	ELOC	-0.0327047	-0.0937742	-0.151858	-0.120352	0.904204	0.931137
Q14203	DCTN1	0.0320219	-0.0852489	-0.204924	0.119693	0.904727	0.931137
P22059	OSBP	0.0321283	-0.0655452	-0.186449	0.11933	0.905014	0.931137
P56192	MARS1	-0.0314162	-0.138383	-0.0878309	-0.11773	0.906282	0.931844
Q7Z6Z7	HUWE1	-0.0313122	-0.128644	-0.112345	-0.116933	0.906914	0.931863
O94925	GLS	-0.0308214	-0.0901269	-0.148096	-0.11624	0.907463	0.931863
O95197	RTN3	-0.030714	-0.0727429	-0.131434	-0.113429	0.90969	0.933553
P30405	PPIF	0.0295715	-0.0878573	-0.263725	0.110481	0.912028	0.935353
P12081	HARS1	0.0296074	-0.0574503	-0.261451	0.109083	0.913136	0.935892
P54136	RARS1	0.0283943	-0.107872	-0.18542	0.106716	0.915014	0.937218
P35998	PSMC2	-0.0267871	-0.118642	-0.129275	-0.0992121	0.92097	0.942716
Q13424	SNTA1	0.0255322	-0.0548446	-0.175025	0.0961622	0.923392	0.944592
P31948	STIP1	0.0238978	-0.0412648	-0.308051	0.0890872	0.929013	0.949736
P43487	RANBP1	0.0220258	-0.0861913	-0.182527	0.0822116	0.934479	0.954418
O75935	DCTN3	0.0217102	-0.0463612	-0.228448	0.08183	0.934782	0.954418
Q15008	PSMD6	-0.0214095	-0.0996614	-0.126039	-0.079245	0.936838	0.955908
Q08AM6	VAC14	-0.0191828	-0.110531	-0.18147	-0.0723715	0.942306	0.960877
Q9BRT3	MIEN1	0.018332	-0.0163993	-0.209821	0.0686947	0.945233	0.963249
Q9UKU0	ACSL6	0.0171729	-0.0714045	-0.180186	0.0639441	0.949015	0.966489
P61158	ACTR3	0.0165229	-0.106646	-0.150088	0.0612756	0.95114	0.96757
P30519	HMOX2	0.0162134	-0.00549819	-0.101637	0.0610962	0.951283	0.96757
Q15366	PCBP2	-0.0158115	-0.128179	-0.212218	-0.0588064	0.953106	0.96881
Q9UBM7	DHCR7	-0.0139112	-0.128178	-0.0881711	-0.0524875	0.95814	0.973077
Q9BRX8	PRXL2A	-0.0139209	-0.00174663	-0.0588108	-0.0519003	0.958608	0.973077
Q9H2H8	PPIL3	-0.0135677	-0.0252665	-0.135419	-0.0511912	0.959173	0.973077
Q08752	PPID	0.0134678	-0.0413728	-0.170215	0.0504923	0.95973	0.973077
O75323	NIPSNAP2	0.0113671	-0.0769717	-0.137293	0.0427146	0.965929	0.978743
O43426	SYNJ1	0.0107978	-0.0873899	-0.144931	0.0405895	0.967623	0.979841
Q9BTW9	TBCD	-0.0104506	-0.110171	-0.126519	-0.0393108	0.968643	0.980254
O14980	XPO1	0.0096879	-0.116609	-0.13228	0.0365484	0.970845	0.981757
Q9H7Z7	PTGES2	-0.00960621	0.00252641	-0.0238192	-0.0351516	0.971959	0.981757
P12277	CKB	-0.00932658	-0.0163194	-0.133888	-0.0351458	0.971964	0.981757
Q96C19	EFHD2	-0.00868374	-0.0447113	-0.121247	-0.0319942	0.974477	0.983676
P38646	HSPA9	0.00762882	-0.0971629	-0.245516	0.0287352	0.977076	0.985428
P42858	HTT	-0.00752401	-0.122123	-0.135714	-0.0282774	0.977441	0.985428
Q7Z3C6	ATG9A	-0.00639989	-0.11844	-0.146466	-0.0240954	0.980777	0.987459
Q96MZ0	GDAP1L1	-0.00625676	-0.119065	-0.190369	-0.0233795	0.981348	0.987459
Q9UDW1	UQCR10	0.00606797	0.0216833	0.0317873	0.0227455	0.981853	0.987459
Q8N573	OXR1	0.00595576	-0.0836177	-0.155026	0.0222803	0.982224	0.987459
P10636	MAPT	-0.00587841	-0.0670563	-0.122285	-0.0218925	0.982534	0.987459
Q9P032	NDUFAF4	-0.00537356	-0.0747107	-0.168855	-0.0202147	0.983872	0.987863
P33121	ACSL1	0.00520076	-0.116264	-0.249709	0.0196016	0.984361	0.987863
O60641	SNAP91	0.00516683	-0.0600734	-0.0938351	0.0190722	0.984784	0.987863
Q13200	PSMD2	-0.00463708	-0.122037	-0.180398	-0.0173324	0.986171	0.988262
Q96RQ3	MCCC1	-0.00459836	-0.118624	-0.17814	-0.0170283	0.986414	0.988262
Q12797	ASPH	0.0037025	-0.0639718	-0.0922471	0.013883	0.988923	0.990158
P55060	CSE1L	-0.00155213	-0.0853245	-0.113939	-0.00569499	0.995456	0.996077
Q92743	HTRA1	-0.000462295	-0.0274292	-0.171837	-0.00171183	0.998634	0.998634

## Sheet: AD-P vs Control
protein	external gene name	logFC	AveExpr AD-P	AveExpr Control	t	P.Value	q.value
P05067	APP	2.01444	0.311806	-1.72502	7.36823	1.73603e-13	2.7846e-10
P62316	SNRPD2	0.989362	0.247218	-0.791472	3.58876	0.000332339	0.266536
P02768	ALB	-0.936625	0.00687425	0.826706	-3.43126	0.000600915	0.319638
Q9Y2B0	CNPY2	0.918724	0.130557	-0.812033	3.35385	0.000797102	0.319638
P68871	HBB	-0.880742	0.0057987	0.84172	-3.18162	0.00146476	0.4173
P27797	CALR	0.881221	0.0815759	-0.870448	3.16315	0.00156097	0.4173
P55809	OXCT1	0.829304	0.206916	-0.658031	3.02552	0.00248241	0.457237
O14979	HNRNPDL	0.81455	0.19452	-0.70858	2.9652	0.00302521	0.457237
Q14697	GANAB	0.803311	0.129432	-0.741907	2.93595	0.00332567	0.457237
Q5TCZ1	SH3PXD2A	0.797559	0.36222	-0.448524	2.89782	0.00375814	0.457237
Q9P2R7	SUCLA2	0.786387	0.208825	-0.600524	2.86882	0.00412055	0.457237
Q9HAV7	GRPEL1	0.78169	0.142224	-0.690907	2.8441	0.00445416	0.457237
P06744	GPI	0.774756	0.135373	-0.706851	2.8382	0.00453733	0.457237
Q96I99	SUCLG2	0.773083	0.193864	-0.599277	2.82368	0.00474811	0.457237
Q6L8Q7	PDE12	0.76891	0.221556	-0.554058	2.81225	0.00492018	0.457237
Q9Y2Q3	GSTK1	0.776337	0.263239	-0.566221	2.80122	0.00509157	0.457237
P17096	HMGA1	-0.763956	-0.0196719	0.644272	-2.79487	0.00519257	0.457237
P22033	MMUT	0.762005	0.256155	-0.563368	2.79015	0.00526888	0.457237
P51674	GPM6A	-0.772197	0.0811698	0.682942	-2.78121	0.00541615	0.457237
Q9NQ66	PLCB1	0.756409	0.295568	-0.549819	2.75918	0.00579513	0.464769
Q9NP79	VTA1	0.754006	0.166847	-0.638232	2.72292	0.00647144	0.494294
Q9UMS0	NFU1	0.740984	0.156479	-0.61343	2.69207	0.00710152	0.503563
Q99613	EIF3C	0.734638	0.2313	-0.607764	2.68624	0.00722678	0.503563
Q96E17	RAB3C	0.721598	0.136028	-0.599003	2.6386	0.00832557	0.503563
P51452	DUSP3	0.71951	0.163667	-0.618965	2.6298	0.00854426	0.503563
P09936	UCHL1	0.72346	0.120347	-0.676344	2.6273	0.00860731	0.503563
P22314	UBA1	0.710849	0.155458	-0.641384	2.60066	0.00930507	0.503563
P27361	MAPK3	0.707489	0.154244	-0.65448	2.59072	0.0095782	0.503563
Q16851	UGP2	-0.708755	0.0569664	0.635191	-2.58049	0.00986671	0.503563
P26640	VARS1	0.706667	0.185053	-0.536122	2.57042	0.0101581	0.503563
O76070	SNCG	-0.700386	0.100506	0.602911	-2.56011	0.0104646	0.503563
P00568	AK1	0.696859	0.129963	-0.665806	2.5503	0.0107637	0.503563
Q86TX2	ACOT1	0.7108	0.19504	-0.538801	2.54765	0.0108458	0.503563
Q9NR46	SH3GLB2	0.713131	0.198029	-0.541322	2.54264	0.0110025	0.503563
Q9BQ69	MACROD1	0.691639	0.246325	-0.514038	2.51731	0.0118263	0.503563
O00479	HMGN4	-0.697858	-0.00156997	0.599866	-2.5145	0.011921	0.503563
O60268	KIAA0513	0.693745	0.155429	-0.588033	2.51343	0.0119571	0.503563
P09496	CLTA	0.685884	0.11057	-0.561933	2.51137	0.0120273	0.503563
P21912	SDHB	-0.68462	0.0707598	0.614257	-2.50506	0.0122437	0.503563
P30044	PRDX5	0.689111	0.157437	-0.600348	2.48002	0.0131384	0.523982
P62937	PPIA	0.674575	0.087223	-0.669827	2.46785	0.0135935	0.523982
Q9UJ70	NAGK	0.680952	0.171032	-0.550355	2.46072	0.0138666	0.523982
Q12931	TRAP1	0.664553	0.153996	-0.615691	2.43352	0.0149537	0.523982
P50213	IDH3A	0.664563	0.133818	-0.499583	2.42997	0.0151011	0.523982
Q9HD42	CHMP1A	-0.669944	0.144656	0.758894	-2.41817	0.0155996	0.523982
P13591	NCAM1	-0.66699	0.111002	0.598137	-2.41666	0.0156645	0.523982
P21964	COMT	0.66103	0.172806	-0.534252	2.4158	0.0157015	0.523982
P07195	LDHB	-0.661609	0.065924	0.58231	-2.40378	0.0162274	0.523982
Q96F85	CNRIP1	0.655605	0.139555	-0.620432	2.40138	0.0163343	0.523982
Q9NTK5	OLA1	0.658851	0.138464	-0.626827	2.39253	0.0167336	0.523982
P30043	BLVRB	0.662325	0.117618	-0.574316	2.39148	0.0167815	0.523982
P78324	SIRPA	-0.655023	0.102824	0.584533	-2.38701	0.0169869	0.523982
P22748	CA4	-0.666958	-0.0135692	0.582978	-2.37934	0.0173448	0.524926
Q9H444	CHMP4B	-0.655885	0.024115	0.654428	-2.37238	0.0176749	0.525009
Q86X55	CARM1	0.661907	0.169464	-0.532975	2.36413	0.0180736	0.527092
P30101	PDIA3	0.64147	0.10513	-0.629952	2.34792	0.0188798	0.532052
P20810	CAST	-0.651486	0.141618	0.644111	-2.33553	0.019517	0.532052
P62879	GNB2	0.647525	0.200362	-0.496205	2.33044	0.0197841	0.532052
Q96JJ7	TMX3	0.643549	0.10266	-0.578211	2.32951	0.0198328	0.532052
P62269	RPS18	-0.643274	0.0290602	0.55218	-2.32821	0.0199022	0.532052
O75880	SCO1	0.6465	0.133353	-0.652439	2.31185	0.0207871	0.540309
P04181	OAT	0.63281	0.177651	-0.508898	2.30087	0.0214002	0.540309
P07099	EPHX1	-0.632496	0.0655908	0.632588	-2.30053	0.0214194	0.540309
P49419	ALDH7A1	-0.630319	0.145317	0.606447	-2.29808	0.0215585	0.540309
Q504Y0	SLC39A12	0.623861	0.305364	-0.505504	2.27629	0.0228297	0.56189
O43432	EIF4G3	0.621103	0.301898	-0.362307	2.26833	0.0233099	0.56189
Q96QK1	VPS35	0.617993	0.147887	-0.495969	2.26417	0.0235649	0.56189
P53597	SUCLG1	0.617737	0.153766	-0.519039	2.25454	0.0241634	0.56189
O14964	HGS	0.613795	0.126074	-0.515183	2.24845	0.0245485	0.56189
Q02252	ALDH6A1	0.618861	0.235731	-0.46769	2.23961	0.0251174	0.56189
Q15293	RCN1	0.60959	0.108505	-0.518779	2.23319	0.0255378	0.56189
Q9UBB6	NCDN	0.611143	0.142886	-0.473478	2.23237	0.0255915	0.56189
P26885	FKBP2	0.613065	0.155872	-0.579528	2.2296	0.0257749	0.56189
P18669	PGAM1	0.618476	0.102153	-0.556018	2.21956	0.0264496	0.56189
Q15121	PEA15	0.61422	0.128318	-0.606697	2.21813	0.0265468	0.56189
Q02790	FKBP4	0.608043	0.0881756	-0.60918	2.21702	0.0266232	0.56189
P23786	CPT2	0.604715	0.154706	-0.538008	2.20508	0.0274495	0.566378
Q14244	MAP7	-0.60222	0.178811	0.58418	-2.20376	0.0275421	0.566378
Q8IWB7	WDFY1	0.600042	0.146285	-0.524706	2.16992	0.0300142	0.594368
O75891	ALDH1L1	0.59322	0.143088	-0.523089	2.16782	0.0301738	0.594368
Q8N126	CADM3	-0.593615	0.0359776	0.488586	-2.16415	0.030454	0.594368
O76054	SEC14L2	0.594691	0.128287	-0.552898	2.16027	0.0307531	0.594368
P62277	RPS13	-0.589795	0.036297	0.498485	-2.16023	0.030756	0.594368
Q00765	REEP5	-0.597968	0.00796617	0.454764	-2.14591	0.0318813	0.596911
Q14165	MLEC	0.598749	0.11175	-0.572604	2.1402	0.03234	0.596911
O14562	UBFD1	0.592589	0.140141	-0.517508	2.13973	0.0323775	0.596911
Q16204	CCDC6	0.600066	0.225076	-0.387335	2.12648	0.0334642	0.596911
P09497	CLTB	0.580679	0.0821108	-0.507603	2.12515	0.0335753	0.596911
P35268	RPL22	-0.580042	0.0756879	0.549458	-2.12439	0.0336384	0.596911
P05204	HMGN2	-0.592794	0.0224905	0.547617	-2.11954	0.0340464	0.596911
Q5T5C0	STXBP5	0.581848	0.180966	-0.463181	2.11307	0.0345957	0.596911
Q15257	PTPA	0.578821	0.0547108	-0.54279	2.10309	0.0354594	0.596911
P46781	RPS9	-0.574044	0.125672	0.537951	-2.10295	0.0354712	0.596911
Q01105	SET	-0.573557	0.0560765	0.429911	-2.09834	0.0358765	0.596911
P67775	PPP2CA	0.583377	0.216558	-0.42133	2.09503	0.0361699	0.596911
P62081	RPS7	-0.573808	0.0616658	0.492762	-2.08528	0.037045	0.596911
P26641	EEF1G	0.569656	0.196604	-0.452927	2.08522	0.0370505	0.596911
P15880	RPS2	-0.567552	0.105928	0.539342	-2.07662	0.0378381	0.596911
O95433	AHSA1	0.566438	0.169767	-0.425927	2.07499	0.0379888	0.596911
Q9UBQ0	VPS29	0.565451	0.097307	-0.510062	2.07049	0.0384081	0.596911
P53677	AP3M2	0.574498	0.171528	-0.370482	2.06639	0.0387931	0.596911
Q05329	GAD2	0.566431	0.157864	-0.384547	2.06301	0.0391132	0.596911
Q9ULU8	CADPS	0.562707	0.190107	-0.403756	2.06159	0.0392478	0.596911
P18124	RPL7	-0.580245	0.0680035	0.524402	-2.05856	0.0395379	0.596911
P31146	CORO1A	0.574355	0.223608	-0.431003	2.05487	0.0398934	0.596911
P08670	VIM	-0.562612	0.102545	0.507902	-2.05445	0.0399338	0.596911
Q9Y6I3	EPN1	0.559141	0.126057	-0.522854	2.04848	0.0405139	0.596911
P52306	RAP1GDS1	0.5624	0.165963	-0.452093	2.04713	0.0406469	0.596911
Q07020	RPL18	-0.57321	0.10281	0.522506	-2.0442	0.0409348	0.596911
P62913	RPL11	-0.562928	0.101254	0.543065	-2.0442	0.0409353	0.596911
O00429	DNM1L	0.555838	0.180566	-0.454133	2.03517	0.0418348	0.603707
Q674X7	KAZN	-0.555632	0.162384	0.660837	-2.03201	0.0421541	0.603707
Q86UE4	MTDH	-0.551928	0.172409	0.52525	-2.02153	0.043226	0.61358
P31323	PRKAR2B	0.556833	0.194334	-0.393241	2.00462	0.0450053	0.614263
P14625	HSP90B1	0.551734	0.0471485	-0.546007	1.99956	0.0455487	0.614263
Q9Y5X3	SNX5	0.549503	0.112995	-0.433862	1.99708	0.045818	0.614263
P11216	PYGB	0.544253	0.176863	-0.345675	1.99388	0.046167	0.614263
Q9NP81	SARS2	0.54295	0.228048	-0.353968	1.98642	0.0469881	0.614263
Q9NQX3	GPHN	-0.558577	0.185834	0.650529	-1.98565	0.0470739	0.614263
P36776	LONP1	0.541656	0.24895	-0.338315	1.9828	0.0473911	0.614263
P49327	FASN	0.541508	0.177121	-0.392972	1.98021	0.0476813	0.614263
Q02750	MAP2K1	0.546445	0.164861	-0.482029	1.97832	0.0478945	0.614263
Q99784	OLFM1	-0.549471	0.0739451	0.605552	-1.97408	0.0483738	0.614263
P13489	RNH1	0.540551	0.14921	-0.464668	1.9711	0.0487134	0.614263
P50993	ATP1A2	-0.539987	0.111402	0.527468	-1.97102	0.0487235	0.614263
P61313	RPL15	-0.545361	0.103388	0.520299	-1.96555	0.0493521	0.614263
P07900	HSP90AA1	0.537941	0.0967174	-0.560562	1.9651	0.0494043	0.614263
Q13572	ITPK1	0.535779	0.145586	-0.429158	1.96159	0.0498119	0.614263
Q86WG3	ATCAY	0.534382	0.119179	-0.424013	1.95782	0.0502522	0.614263
P50914	RPL14	-0.535047	0.0659597	0.492249	-1.95775	0.0502613	0.614263
P60981	DSTN	0.545767	0.180268	-0.428342	1.95519	0.0505617	0.614263
P62899	RPL31	-0.542298	0.0536611	0.491909	-1.95487	0.0506002	0.614263
P21926	CD9	-0.537001	0.113084	0.362774	-1.95205	0.0509333	0.614263
P32969	RPL9	-0.533713	0.067996	0.50158	-1.94515	0.0517586	0.61582
P62917	RPL8	-0.541848	0.0803477	0.536107	-1.94217	0.0521175	0.61582
Q99426	TBCB	0.529418	0.14069	-0.478488	1.93956	0.0524341	0.61582
Q9Y2Q0	ATP8A1	0.528688	0.198098	-0.356477	1.93264	0.0532821	0.61582
Q9HCC0	MCCC2	-0.535982	0.11625	0.609728	-1.93159	0.0534113	0.61582
Q9UNZ2	NSFL1C	0.53111	0.0984094	-0.550375	1.93088	0.0534997	0.61582
P23528	CFL1	0.52649	0.178386	-0.415463	1.92886	0.0537499	0.61582
Q15046	KARS1	0.536572	0.216509	-0.377774	1.92551	0.0541675	0.616204
P08243	ASNS	-0.534041	0.12678	0.586879	-1.91805	0.0551059	0.621345
P83731	RPL24	-0.52746	0.0839666	0.503567	-1.91578	0.0553942	0.621345
Q96PB7	OLFM3	-0.521877	0.149645	0.613548	-1.91176	0.0559079	0.622752
Q96PE3	INPP4A	0.523389	0.236035	-0.275264	1.90369	0.0569525	0.627191
Q9H9A6	LRRC40	0.521458	0.195931	-0.345609	1.90264	0.0570884	0.627191
P40925	MDH1	-0.521736	0.0925343	0.468852	-1.89805	0.0576905	0.629494
P39019	RPS19	-0.521244	0.0530223	0.451804	-1.89137	0.0585761	0.634838
Q8N3V7	SYNPO	-0.517261	0.243336	0.63235	-1.87426	0.060896	0.636887
Q96FC7	PHYHIPL	0.513829	0.140809	-0.415625	1.874	0.0609324	0.636887
P39023	RPL3	-0.512234	0.134813	0.525407	-1.87295	0.0610773	0.636887
P62851	RPS25	-0.511855	0.0980117	0.503533	-1.87258	0.0611274	0.636887
Q7Z6L0	PRRT2	-0.514903	0.141295	0.551168	-1.87201	0.0612061	0.636887
Q8WWC4	MAIP1	0.511301	0.202658	-0.392554	1.87054	0.0614099	0.636887
P62701	RPS4X	-0.520463	0.0876026	0.418703	-1.86608	0.0620319	0.636887
P62750	RPL23A	-0.514499	0.00489715	0.452371	-1.85949	0.0629597	0.636887
P01857	IGHG1	-0.507416	0.0960299	0.544774	-1.85908	0.0630177	0.636887
Q16566	CAMK4	-0.516725	0.209023	0.677286	-1.85651	0.0633825	0.636887
Q96FW1	OTUB1	0.507709	0.158792	-0.397946	1.85401	0.0637397	0.636887
P24821	TNC	-0.511842	0.139545	0.502338	-1.84802	0.0646003	0.636887
P62244	RPS15A	-0.504744	0.109438	0.461021	-1.84769	0.0646483	0.636887
Q12983	BNIP3	-0.505591	0.0900804	0.49315	-1.84735	0.0646979	0.636887
P60174	TPI1	0.504127	0.115601	-0.471256	1.84566	0.0649433	0.636887
P62424	RPL7A	-0.509717	0.124109	0.514998	-1.84111	0.0656071	0.636887
O43765	SGTA	0.51331	0.125946	-0.479943	1.83903	0.0659129	0.636887
P23471	PTPRZ1	-0.502926	0.0821391	0.509722	-1.83791	0.0660773	0.636887
Q16643	DBN1	0.500895	0.183326	-0.326015	1.83415	0.0666338	0.636887
P11441	UBL4A	-0.500492	0.159765	0.516194	-1.83289	0.06682	0.636887
P08247	SYP	-0.502024	0.102587	0.509273	-1.83099	0.0671034	0.636887
P30050	RPL12	-0.501916	0.127727	0.502092	-1.82775	0.0675889	0.637721
Q8N987	NECAB1	0.500694	0.132378	-0.473472	1.81487	0.0695459	0.652349
P80404	ABAT	0.49456	0.174882	-0.38745	1.8113	0.0700967	0.652796
P27816	MAP4	-0.503558	0.154858	0.513851	-1.80488	0.0710945	0.652796
P62266	RPS23	-0.505474	0.129291	0.515825	-1.80379	0.0712654	0.652796
Q4G0F5	VPS26B	0.498859	0.1279	-0.449582	1.80344	0.0713201	0.652796
Q9NUB1	ACSS1	0.496431	0.165014	-0.328107	1.79898	0.0720237	0.652796
Q147X3	NAA30	0.495515	0.2452	-0.283701	1.7947	0.0727038	0.652796
Q96AQ6	PBXIP1	0.487553	0.169671	-0.40226	1.78565	0.0741581	0.652796
Q16352	INA	-0.487877	0.165936	0.448381	-1.78546	0.074188	0.652796
Q8NBS9	TXNDC5	0.494483	0.138487	-0.435857	1.78498	0.074266	0.652796
Q99962	SH3GL2	0.488218	0.0879091	-0.474753	1.78297	0.074593	0.652796
Q9UJU6	DBNL	0.491107	0.190125	-0.363649	1.77799	0.0754077	0.652796
P08238	HSP90AB1	0.484903	0.113195	-0.441836	1.7764	0.0756692	0.652796
Q8N145	LGI3	-0.484924	0.107497	0.436972	-1.7729	0.0762464	0.652796
P17174	GOT1	-0.486451	0.154692	0.431738	-1.77112	0.0765416	0.652796
Q14764	MVP	-0.483972	0.151566	0.478374	-1.77049	0.0766468	0.652796
O94856	NFASC	-0.48471	0.165209	0.452302	-1.76981	0.07676	0.652796
P30520	ADSS2	0.491038	0.126866	-0.371733	1.76956	0.0768026	0.652796
P29692	EEF1D	0.483496	0.158068	-0.443325	1.76859	0.0769647	0.652796
P43034	PAFAH1B1	0.482127	0.124673	-0.392949	1.76642	0.0773262	0.652796
O94817	ATG12	0.481273	0.192892	-0.330667	1.75867	0.0786349	0.658795
Q16531	DDB1	-0.485011	0.229106	0.594677	-1.75736	0.0788583	0.658795
P05026	ATP1B1	-0.479704	0.0852263	0.411619	-1.75191	0.0797903	0.65937
O00764	PDXK	0.48451	0.154149	-0.34606	1.74979	0.0801556	0.65937
P62263	RPS14	-0.483198	0.0975967	0.517515	-1.74758	0.0805387	0.65937
Q99259	GAD1	0.478169	0.165492	-0.324539	1.74616	0.0807854	0.65937
P04156	PRNP	-0.478886	0.113662	0.458357	-1.74168	0.0815652	0.65937
Q9BRQ6	CHCHD6	-0.478547	0.0886978	0.457789	-1.74166	0.0815693	0.65937
Q14152	EIF3A	0.478972	0.126462	-0.433291	1.73797	0.0822174	0.65937
Q14974	KPNB1	0.474976	0.187727	-0.364893	1.73196	0.0832823	0.65937
Q9BXS5	AP1M1	0.473904	0.119901	-0.445217	1.73087	0.083476	0.65937
P48735	IDH2	0.47808	0.214556	-0.253689	1.73048	0.0835455	0.65937
Q8IWA5	SLC44A2	-0.474394	0.151434	0.427625	-1.72959	0.0837051	0.65937
O43615	TIMM44	0.479508	0.174934	-0.390903	1.72872	0.08386	0.65937
P11217	PYGM	0.47549	0.0640328	-0.473671	1.72515	0.0845013	0.661171
P08708	RPS17	-0.469176	0.106403	0.485242	-1.71714	0.0859546	0.662918
P61764	STXBP1	0.467646	0.137839	-0.368843	1.71336	0.0866489	0.662918
P02511	CRYAB	-0.467192	0.0867004	0.323705	-1.71145	0.0870002	0.662918
Q9NRG7	SDR39U1	0.474795	0.180071	-0.372513	1.71035	0.0872023	0.662918
P02686	MBP	-0.46625	0.111866	0.362047	-1.70796	0.0876448	0.662918
O75936	BBOX1	0.467723	0.117216	-0.405391	1.70714	0.0877976	0.662918
O00154	ACOT7	0.470986	0.127855	-0.2979	1.70627	0.087959	0.662918
Q09666	AHNAK	-0.475814	0.169003	0.534021	-1.70589	0.0880308	0.662918
O00408	PDE2A	0.465506	0.214597	-0.250218	1.69994	0.0891441	0.662925
Q9NQ48	LZTFL1	0.473963	0.117934	-0.411594	1.69571	0.0899421	0.662925
Q96KG9	SCYL1	0.466534	0.241507	-0.262648	1.69414	0.0902399	0.662925
Q02543	RPL18A	-0.474597	0.130459	0.499925	-1.6878	0.0914519	0.662925
Q13423	NNT	0.4609	0.158435	-0.339623	1.68773	0.0914652	0.662925
Q9P121	NTM	-0.462489	0.119457	0.453962	-1.68615	0.0917681	0.662925
P55290	CDH13	-0.460974	0.0977519	0.439616	-1.68508	0.0919756	0.662925
O43175	PHGDH	0.460694	0.143273	-0.359853	1.68257	0.0924597	0.662925
Q99961	SH3GL1	0.459391	0.136132	-0.420955	1.68209	0.0925536	0.662925
Q13155	AIMP2	0.462885	0.17539	-0.335944	1.68159	0.0926505	0.662925
Q99873	PRMT1	0.466106	0.167072	-0.351146	1.6801	0.0929398	0.662925
P16615	ATP2A2	0.459684	0.188853	-0.319835	1.67983	0.0929913	0.662925
P60033	CD81	-0.456171	0.161824	0.408717	-1.67102	0.0947189	0.666549
Q13367	AP3B2	0.460164	0.260738	-0.221896	1.67097	0.0947293	0.666549
Q7Z3J2	VPS35L	0.455986	0.227615	-0.236888	1.67064	0.0947935	0.666549
P62241	RPS8	-0.455523	0.121863	0.458303	-1.66878	0.0951619	0.666549
Q8IVF2	AHNAK2	-0.455346	0.214396	0.573709	-1.66609	0.0956978	0.667327
P51553	IDH3G	0.455944	0.179962	-0.289265	1.66404	0.0961051	0.667327
P40429	RPL13A	-0.459752	0.133009	0.475323	-1.65466	0.0979941	0.677511
O43759	SYNGR1	-0.450384	0.172106	0.506184	-1.64914	0.0991216	0.680669
Q9BRK0	REEP2	-0.449336	0.0072208	0.375621	-1.64623	0.0997191	0.680669
Q02878	RPL6	-0.453582	0.117746	0.439977	-1.64524	0.0999213	0.680669
Q96GD0	PDXP	0.44936	0.106167	-0.367133	1.64384	0.100211	0.680669
P05388	RPLP0	-0.455732	0.145221	0.500598	-1.64209	0.100573	0.680669
P22102	GART	0.447272	0.22889	-0.296715	1.63432	0.102194	0.682801
P40121	CAPG	0.454121	0.16099	-0.320568	1.63431	0.102196	0.682801
Q04917	YWHAH	0.447085	0.122917	-0.38107	1.63372	0.102318	0.682801
P05387	RPLP2	-0.456393	0.0926842	0.401934	-1.63243	0.10259	0.682801
Q15388	TOMM20	-0.458989	0.202859	0.538329	-1.6271	0.103717	0.687233
Q16401	PSMD5	0.443983	0.210001	-0.247774	1.62467	0.104234	0.687233
O14617	AP3D1	0.450143	0.233994	-0.221288	1.62198	0.10481	0.687233
P27348	YWHAQ	0.441752	0.133319	-0.355173	1.61772	0.105724	0.687233
Q9Y6R1	SLC4A4	-0.446602	0.170431	0.473053	-1.61726	0.105824	0.687233
Q8N9R8	SCAI	0.445819	0.202586	-0.272856	1.61724	0.105827	0.687233
Q969E2	SCAMP4	-0.440793	0.10623	0.426271	-1.61439	0.106444	0.687692
P26373	RPL13	-0.443541	0.12533	0.483238	-1.60981	0.107442	0.687692
Q9Y3C8	UFC1	0.451468	0.127092	-0.395872	1.60973	0.107459	0.687692
P62249	RPS16	-0.441812	0.102392	0.426651	-1.60129	0.109315	0.687692
P46779	RPL28	-0.445292	0.166265	0.512298	-1.60076	0.109433	0.687692
Q8N9I0	SYT2	0.437196	0.060869	-0.464646	1.60051	0.109487	0.687692
O75116	ROCK2	0.436255	0.14254	-0.291904	1.59799	0.110046	0.687692
Q93009	USP7	0.443156	0.211492	-0.288406	1.59691	0.110288	0.687692
P42658	DPP6	-0.437593	0.147184	0.489744	-1.59567	0.110565	0.687692
O95372	LYPLA2	0.436037	0.162223	-0.304143	1.59392	0.110956	0.687692
P46109	CRKL	0.435935	0.14057	-0.41925	1.59338	0.111078	0.687692
Q7L5N1	COPS6	0.441486	0.110103	-0.406923	1.59214	0.111354	0.687692
P51809	VAMP7	0.436294	0.1546	-0.374385	1.58787	0.112318	0.687692
Q9P0M9	MRPL27	-0.434128	0.0774713	0.444233	-1.58632	0.112669	0.687692
Q8NF37	LPCAT1	0.432803	0.167746	-0.285483	1.58454	0.113072	0.687692
P13798	APEH	-0.432056	0.0751562	0.360786	-1.5829	0.113446	0.687692
P05023	ATP1A1	-0.432882	0.162516	0.460949	-1.58082	0.11392	0.687692
P35609	ACTN2	-0.432972	0.209204	0.549697	-1.57829	0.1145	0.687692
Q93008	USP9X	0.436482	0.230276	-0.232215	1.57725	0.114739	0.687692
Q92973	TNPO1	0.43689	0.210445	-0.272745	1.57628	0.114963	0.687692
Q9UNM6	PSMD13	0.430662	0.28686	-0.181131	1.57396	0.115499	0.687692
Q9H0Q0	CYRIA	0.434639	0.154706	-0.307252	1.57319	0.115677	0.687692
Q14240	EIF4A2	0.429793	0.115892	-0.36054	1.57283	0.115759	0.687692
P12814	ACTN1	-0.427198	0.189796	0.517094	-1.56442	0.11772	0.693984
Q6NV74	CRACDL	-0.434067	0.242022	0.596746	-1.56387	0.11785	0.693984
O75340	PDCD6	-0.435853	0.128162	0.451112	-1.56158	0.118389	0.693984
Q9H9H5	MAP6D1	-0.429189	0.119866	0.448493	-1.56011	0.118736	0.693984
Q08554	DSC1	-0.426234	0.0760075	0.517128	-1.55907	0.118981	0.693984
Q8TF44	C2CD4C	-0.424361	0.119217	0.583441	-1.55434	0.120104	0.69494
Q13449	LSAMP	-0.428631	0.0786514	0.384682	-1.55347	0.120312	0.69494
P23515	OMG	-0.426076	0.100581	0.371235	-1.55292	0.120445	0.69494
Q9UKF7	PITPNC1	0.423699	0.117958	-0.344672	1.55072	0.120971	0.695474
O15066	KIF3B	-0.432893	0.0655569	0.413356	-1.54583	0.122148	0.699736
P33121	ACSL1	0.42189	0.246895	-0.249709	1.54394	0.122604	0.699848
P49418	AMPH	0.423882	0.132403	-0.299169	1.54076	0.123377	0.701762
P63104	YWHAZ	0.421156	0.121255	-0.313277	1.53836	0.123963	0.702604
P07196	NEFL	-0.417837	0.145568	0.346806	-1.52853	0.126382	0.705705
P46782	RPS5	-0.425031	0.121214	0.424981	-1.52826	0.126451	0.705705
O00264	PGRMC1	0.419741	0.117117	-0.415389	1.52623	0.126953	0.705705
P31946	YWHAB	0.417232	0.109755	-0.334658	1.52619	0.126964	0.705705
Q92522	H1-10	-0.423308	0.0817354	0.416656	-1.52285	0.127799	0.705705
P60866	RPS20	-0.415856	0.143944	0.477818	-1.52283	0.127802	0.705705
Q9UHG3	PCYOX1	-0.418206	0.128299	0.359514	-1.52174	0.128077	0.705705
Q9UH65	SWAP70	0.41651	0.149182	-0.377793	1.52136	0.128172	0.705705
O75083	WDR1	0.416707	0.144246	-0.33482	1.52017	0.12847	0.705705
Q9UK22	FBXO2	0.418385	0.0988442	-0.41011	1.51512	0.129744	0.710272
P30086	PEBP1	-0.414569	0.119889	0.345662	-1.5098	0.131097	0.712639
P27824	CANX	0.411529	0.134868	-0.361979	1.50678	0.131869	0.712639
Q00610	CLTC	0.411283	0.130833	-0.279986	1.50668	0.131894	0.712639
Q9NZW5	PALS2	0.413704	0.219464	-0.247578	1.50645	0.131954	0.712639
Q8IXJ6	SIRT2	-0.418595	0.131215	0.355416	-1.49928	0.133802	0.720196
P11169	SLC2A3	-0.409417	0.0874532	0.433203	-1.4957	0.134734	0.722785
P08865	RPSA	-0.407044	0.0607661	0.365792	-1.49088	0.135995	0.727117
P21589	NT5E	-0.413621	0.114003	0.451001	-1.48838	0.136653	0.727117
O60610	DIAPH1	0.411514	0.293003	-0.121814	1.48202	0.138335	0.727117
Q8WXS5	CACNG8	-0.407153	0.144491	0.525575	-1.48194	0.138357	0.727117
P84098	RPL19	-0.414409	0.133434	0.466835	-1.48188	0.138374	0.727117
Q15349	RPS6KA2	0.405998	0.1491	-0.298546	1.47986	0.138913	0.727117
P62714	PPP2CB	0.405034	0.208866	-0.258727	1.47892	0.139163	0.727117
O75165	DNAJC13	0.409076	0.0543983	-0.432675	1.47824	0.139347	0.727117
Q9NWV8	BABAM1	-0.409308	0.18461	0.485051	-1.47424	0.140418	0.727117
Q92572	AP3S1	0.402754	0.149951	-0.329166	1.47349	0.140619	0.727117
P07093	SERPINE2	-0.410767	0.0523654	0.423179	-1.47211	0.140993	0.727117
O75061	DNAJC6	0.40335	0.191216	-0.239575	1.47138	0.14119	0.727117
Q14982	OPCML	-0.408987	0.112747	0.419976	-1.47048	0.141434	0.727117
P46976	GYG1	-0.407349	0.0640593	0.353764	-1.46255	0.143593	0.731761
Q02410	APBA1	0.403266	0.27806	-0.190624	1.46236	0.143644	0.731761
P63220	RPS21	-0.408277	0.0916369	0.381379	-1.46213	0.143706	0.731761
Q12860	CNTN1	-0.402936	0.127492	0.424029	-1.45843	0.144723	0.734608
Q10567	AP1B1	0.407019	0.201572	-0.272158	1.45655	0.145242	0.734915
P07355	ANXA2	-0.39755	0.046726	0.417618	-1.45488	0.145705	0.734939
P18077	RPL35A	-0.40778	0.139522	0.447582	-1.44516	0.148414	0.746257
O60282	KIF5C	0.393686	0.205462	-0.198001	1.43959	0.149984	0.750537
P35080	PFN2	0.39312	0.0897331	-0.387078	1.43883	0.150201	0.750537
P30041	PRDX6	-0.393161	0.116704	0.375396	-1.43184	0.15219	0.758115
P61247	RPS3A	-0.396017	0.10282	0.379492	-1.427	0.153581	0.761206
Q9H4M9	EHD1	0.389002	0.140275	-0.321063	1.42492	0.154181	0.761206
P61601	NCALD	-0.396944	0.186489	0.429326	-1.42399	0.154451	0.761206
P52565	ARHGDIA	0.389192	0.0386775	-0.442259	1.42248	0.154888	0.761206
O94772	LY6H	-0.399374	0.120104	0.359867	-1.42146	0.155184	0.761206
A0AVT1	UBA6	0.386563	0.262342	-0.232697	1.41586	0.156818	0.762427
O75190	DNAJB6	-0.386127	0.0686082	0.351509	-1.41183	0.158002	0.762427
Q8WUM4	PDCD6IP	0.38745	0.167793	-0.291839	1.40955	0.158674	0.762427
P30153	PPP2R1A	0.391114	0.175147	-0.264892	1.40751	0.159278	0.762427
P18621	RPL17	-0.389448	0.109168	0.445496	-1.4072	0.159369	0.762427
Q9BT78	COPS4	0.385104	0.114935	-0.333885	1.4039	0.160349	0.762427
Q15019	SEPTIN2	-0.383196	0.135986	0.316934	-1.40375	0.160394	0.762427
Q9Y320	TMX2	0.383537	0.183433	-0.24243	1.40208	0.160892	0.762427
O14594	NCAN	-0.385005	0.0427783	0.349	-1.40201	0.160913	0.762427
Q9UI40	SLC24A2	-0.387129	0.126676	0.331321	-1.40086	0.161257	0.762427
Q9BPW8	NIPSNAP1	0.384053	0.139083	-0.203238	1.40068	0.161311	0.762427
Q9UQN3	CHMP2B	-0.389022	0.145071	0.427974	-1.39951	0.161663	0.762427
O43707	ACTN4	-0.381599	0.146134	0.440042	-1.39735	0.162309	0.762427
O95057	DIRAS1	-0.381679	0.121188	0.435109	-1.39555	0.16285	0.762427
Q6IBS0	TWF2	0.382107	0.109583	-0.318305	1.39545	0.162881	0.762427
P45985	MAP2K4	0.381764	0.190904	-0.282324	1.39442	0.163192	0.762427
P62745	RHOB	-0.381217	0.140222	0.401062	-1.39336	0.163513	0.762427
P23396	RPS3	-0.37797	0.106561	0.383148	-1.3845	0.166207	0.768918
Q5T442	GJC2	-0.377389	0.14416	0.395116	-1.38239	0.166852	0.768918
P62753	RPS6	-0.387088	0.173493	0.45278	-1.38228	0.166888	0.768918
P17302	GJA1	0.378219	0.122303	-0.187721	1.38143	0.167147	0.768918
P07197	NEFM	-0.376943	0.160946	0.326694	-1.38093	0.167302	0.768918
Q15366	PCBP2	0.37979	0.246695	-0.212218	1.37151	0.170218	0.779073
P29401	TKT	0.379516	0.102835	-0.319175	1.36963	0.170804	0.779073
Q6UWR7	ENPP6	-0.380286	0.134966	0.307858	-1.36698	0.171635	0.779073
Q9H0E2	TOLLIP	0.371865	0.142563	-0.32042	1.36246	0.173054	0.779073
P62857	RPS28	-0.380041	0.114149	0.404367	-1.36197	0.173209	0.779073
Q02246	CNTN2	-0.373623	0.115582	0.33637	-1.36073	0.173599	0.779073
O00410	IPO5	0.372094	0.238153	-0.189721	1.35885	0.174196	0.779073
Q9NZN3	EHD3	0.371797	0.151145	-0.306404	1.3576	0.174593	0.779073
P62258	YWHAE	0.371918	0.105307	-0.287456	1.35503	0.17541	0.779073
Q9BTV5	FSD1	0.375656	0.139948	-0.300594	1.35489	0.175455	0.779073
A6ZKI3	RTL8C	-0.371767	0.0862599	0.355232	-1.35267	0.176162	0.779073
Q9GZY8	MFF	-0.370191	0.122902	0.431355	-1.35199	0.176381	0.779073
Q16798	ME3	-0.375891	0.206238	0.435859	-1.35132	0.176594	0.779073
Q13200	PSMD2	0.37214	0.226122	-0.180398	1.3506	0.176826	0.779073
Q02978	SLC25A11	-0.372617	0.0617082	0.375552	-1.34997	0.177027	0.779073
Q8WVM8	SCFD1	0.374067	0.182647	-0.287256	1.34848	0.177505	0.779073
P30405	PPIF	0.37138	0.216901	-0.263725	1.34722	0.177911	0.779073
P18433	PTPRA	0.370929	0.183758	-0.224641	1.34615	0.178254	0.779073
P50583	NUDT2	0.366911	0.0943116	-0.281083	1.34408	0.178925	0.779879
P28072	PSMB6	-0.368171	0.130117	0.332237	-1.34211	0.179563	0.780538
Q96A23	CPNE4	-0.37372	0.205309	0.495481	-1.33592	0.181576	0.786379
P53365	ARFIP2	0.369994	0.182262	-0.224762	1.33485	0.181929	0.786379
Q92905	COPS5	0.363873	0.133057	-0.331663	1.33307	0.182509	0.786379
Q15056	EIF4H	0.372544	0.12881	-0.287753	1.33198	0.182868	0.786379
P54577	YARS1	0.362903	0.181614	-0.317342	1.32589	0.184878	0.791626
Q96SW2	CRBN	0.362795	0.262295	-0.0848567	1.3253	0.185075	0.791626
Q99497	PARK7	-0.362504	0.144123	0.304375	-1.32308	0.185811	0.792661
P62829	RPL23	-0.35855	0.166466	0.412914	-1.3135	0.189015	0.799354
Q86YM7	HOMER1	-0.360621	0.190828	0.422085	-1.31337	0.18906	0.799354
P07305	H1-0	-0.35804	0.0795727	0.343911	-1.31134	0.189743	0.799354
Q9C0D0	PHACTR1	-0.35852	0.234904	0.584983	-1.30961	0.190329	0.799354
P54136	RARS1	0.358744	0.21037	-0.18542	1.30915	0.190485	0.799354
Q96RQ3	MCCC1	0.363902	0.220925	-0.17814	1.30845	0.190722	0.799354
P28066	PSMA5	-0.365468	0.143554	0.415625	-1.30802	0.190868	0.799354
Q13011	ECH1	-0.359507	0.142424	0.372273	-1.30654	0.19137	0.799369
P48729	CSNK1A1	-0.359119	0.116707	0.41472	-1.30251	0.192743	0.801517
O14980	XPO1	0.354994	0.199857	-0.13228	1.30037	0.193477	0.801517
Q96B97	SH3KBP1	-0.360438	0.127115	0.432967	-1.29925	0.193858	0.801517
Q4J6C6	PREPL	0.356818	0.116427	-0.3185	1.29918	0.193883	0.801517
Q5SSJ5	HP1BP3	-0.357413	0.154278	0.407207	-1.2961	0.194942	0.802564
Q96MZ0	GDAP1L1	0.356936	0.226423	-0.190369	1.29503	0.19531	0.802564
Q96KP4	CNDP2	0.353397	0.0522165	-0.355215	1.29409	0.195638	0.802564
P16152	CBR1	0.355901	0.124358	-0.358557	1.29155	0.196515	0.804107
P10412	H1-4	-0.352082	0.101247	0.319275	-1.28469	0.198901	0.811568
Q9P0V9	SEPTIN10	-0.354854	0.179401	0.347008	-1.2817	0.19995	0.811568
P42262	GRIA2	-0.349646	0.208698	0.503633	-1.28085	0.200249	0.811568
Q8IYB5	SMAP1	0.350551	0.176193	-0.229056	1.28053	0.200362	0.811568
Q96SB3	PPP1R9B	-0.351057	0.209748	0.48832	-1.2768	0.201675	0.812987
P61201	COPS2	0.354102	0.147702	-0.298596	1.27665	0.201726	0.812987
Q969P0	IGSF8	-0.349904	0.152619	0.408334	-1.27372	0.202764	0.814841
P61626	LYZ	-0.353527	0.0945109	0.359082	-1.27249	0.203202	0.814841
Q92752	TNR	-0.346256	0.108463	0.366937	-1.26358	0.206383	0.825531
Q14203	DCTN1	0.3475	0.189856	-0.204924	1.26119	0.207243	0.825889
P49589	CARS1	0.34931	0.139499	-0.242481	1.26047	0.207502	0.825889
P61158	ACTR3	0.348997	0.194548	-0.150088	1.25669	0.208867	0.82668
P05386	RPLP1	-0.349212	0.161492	0.308301	-1.25557	0.209275	0.82668
P61353	RPL27	-0.348583	0.097192	0.387623	-1.25304	0.210191	0.82668
P38646	HSPA9	0.342588	0.221222	-0.245516	1.25295	0.210224	0.82668
O60762	DPM1	-0.343774	0.134763	0.434457	-1.25281	0.210278	0.82668
P60484	PTEN	-0.340879	0.189266	0.501898	-1.24581	0.212834	0.833872
P42858	HTT	0.341023	0.208166	-0.135714	1.24445	0.213335	0.833872
P62280	RPS11	-0.34357	0.146363	0.372904	-1.24302	0.213863	0.833872
Q9BW30	TPPP3	-0.347065	0.165978	0.344561	-1.24115	0.21455	0.833872
P0DP25	CALM3	-0.339476	0.0572587	0.32988	-1.23976	0.215066	0.833872
Q16658	FSCN1	0.338106	0.103425	-0.343404	1.23733	0.215967	0.833872
P46777	RPL5	-0.343229	0.0999408	0.388251	-1.23503	0.216822	0.833872
P20916	MAG	-0.336985	0.138108	0.29104	-1.23456	0.216995	0.833872
Q9BR76	CORO1B	0.340667	0.154344	-0.282304	1.22985	0.218753	0.833872
Q7Z6Z7	HUWE1	0.338432	0.206906	-0.112345	1.22716	0.219765	0.833872
P17812	CTPS1	0.339781	0.249281	-0.148635	1.22684	0.219886	0.833872
Q13303	KCNAB2	-0.33547	0.13939	0.348642	-1.22679	0.219902	0.833872
P32189	GK	-0.339712	0.205072	0.448884	-1.22601	0.220198	0.833872
Q9Y2D4	EXOC6B	0.3347	0.238746	-0.130412	1.22377	0.221042	0.833872
Q9NSE4	IARS2	0.335377	0.21844	-0.123076	1.22353	0.221132	0.833872
Q6YP21	KYAT3	0.342077	0.114766	-0.236202	1.22202	0.221702	0.833872
Q9NXU5	ARL15	0.337321	0.171433	-0.21815	1.22065	0.222218	0.833872
Q92561	PHYHIP	0.33421	0.169553	-0.230736	1.21898	0.222855	0.833872
Q6IAN0	DHRS7B	-0.33295	0.224195	0.511413	-1.21866	0.222974	0.833872
O43865	AHCYL1	-0.332576	0.211172	0.443536	-1.21792	0.223257	0.833872
P62826	RAN	0.334473	0.0964152	-0.291121	1.21653	0.223784	0.833872
Q7L1Q6	BZW1	0.339727	0.0875873	-0.328187	1.21439	0.224599	0.833872
Q8WW22	DNAJA4	-0.336727	0.176889	0.484447	-1.21032	0.226159	0.833872
Q7Z3C6	ATG9A	0.330758	0.20789	-0.146466	1.20914	0.226611	0.833872
Q86YZ3	HRNR	-0.334304	0.118548	0.434977	-1.20898	0.226671	0.833872
P67936	TPM4	-0.33603	0.106746	0.385703	-1.20811	0.227008	0.833872
P02533	KRT14	-0.335274	0.136535	0.48873	-1.20758	0.22721	0.833872
P05109	S100A8	-0.329435	-0.0106533	0.212327	-1.2065	0.227626	0.833872
Q9Y697	NFS1	0.33202	0.14519	-0.239891	1.20646	0.227641	0.833872
Q08AM6	VAC14	0.329302	0.212112	-0.18147	1.2063	0.227703	0.833872
P43487	RANBP1	0.332138	0.181985	-0.182527	1.20372	0.2287	0.834526
P04264	KRT1	-0.328373	0.126751	0.464823	-1.203	0.228977	0.834526
Q16891	IMMT	-0.32888	0.166439	0.410193	-1.2018	0.229443	0.834526
Q9H1E5	TMX4	0.332589	0.23097	-0.197406	1.19694	0.231333	0.838068
P51572	BCAP31	0.334936	-0.0427878	-0.264223	1.19661	0.231461	0.838068
O14974	PPP1R12A	-0.326778	0.171637	0.391002	-1.19244	0.233089	0.84206
Q9NTJ5	SACM1L	0.327086	0.222356	-0.139857	1.18951	0.234239	0.844314
O43681	GET3	0.323112	0.167258	-0.215525	1.1838	0.236493	0.850378
P82909	MRPS36	-0.322751	0.0911245	0.331941	-1.1794	0.238242	0.850378
P21266	GSTM3	0.324065	0.12407	-0.321427	1.17776	0.238894	0.850378
Q15382	RHEB	-0.323075	0.0701906	0.328023	-1.17672	0.23931	0.850378
Q07157	TJP1	-0.32085	0.173748	0.365667	-1.17523	0.239905	0.850378
P43003	SLC1A3	-0.32885	0.000725637	0.250506	-1.17512	0.239948	0.850378
P63096	GNAI1	-0.327475	0.163188	0.359015	-1.17473	0.240106	0.850378
O00139	KIF2A	0.321277	0.242508	-0.0914703	1.17458	0.240163	0.850378
P62906	RPL10A	-0.327355	0.125146	0.357985	-1.17198	0.241207	0.851147
Q9UBM7	DHCR7	0.319748	0.196548	-0.0881711	1.1714	0.241441	0.851147
O75077	ADAM23	-0.318514	0.122075	0.338868	-1.16637	0.243465	0.852915
O15394	NCAM2	-0.320312	0.192873	0.38715	-1.16547	0.243831	0.852915
P56192	MARS1	0.319844	0.209221	-0.0878309	1.16379	0.24451	0.852915
Q00688	FKBP3	-0.318263	0.146204	0.322061	-1.16296	0.244848	0.852915
O95757	HSPA4L	0.32526	0.241847	-0.18429	1.1626	0.244995	0.852915
P10114	RAP2A	-0.316853	0.108976	0.4319	-1.1608	0.245726	0.852915
P49441	INPP1	0.317916	0.140593	-0.266427	1.16062	0.245796	0.852915
P10809	HSPD1	-0.317845	0.112627	0.318629	-1.15864	0.246605	0.852915
P02689	PMP2	-0.316154	0.130199	0.20241	-1.15834	0.246728	0.852915
Q6PIU2	NCEH1	0.317791	0.104074	-0.288032	1.15582	0.247757	0.85345
P55010	EIF5	0.315366	0.0995235	-0.299709	1.15535	0.247948	0.85345
P25686	DNAJB2	-0.314906	0.132197	0.355067	-1.15157	0.249498	0.85695
Q96GW7	BCAN	-0.315215	0.0607339	0.269403	-1.14824	0.25087	0.85783
P27635	RPL10	-0.322514	0.179617	0.445212	-1.14717	0.251313	0.85783
P50395	GDI2	-0.315447	0.178227	0.298564	-1.14672	0.251497	0.85783
P13637	ATP1A3	-0.313548	0.173566	0.371834	-1.1453	0.252085	0.85783
P12081	HARS1	0.319678	0.177812	-0.261451	1.1436	0.25279	0.85783
Q96PY5	FMNL2	-0.313667	0.164485	0.313839	-1.13977	0.254383	0.85783
Q9H492	MAP1LC3A	-0.315809	0.118082	0.383921	-1.13969	0.254416	0.85783
Q15070	OXA1L	-0.322826	0.0878423	0.334398	-1.13855	0.254892	0.85783
Q8N387	MUC15	-0.318988	0.240756	0.451117	-1.1367	0.255663	0.85783
Q86XE0	SNX32	0.310283	0.271513	0.0589957	1.13491	0.256413	0.85783
Q99623	PHB2	-0.311203	0.0603365	0.238945	-1.13459	0.256549	0.85783
P53396	ACLY	0.311343	0.130427	-0.202509	1.1334	0.257049	0.85783
P47897	QARS1	0.319525	0.165707	-0.184143	1.13303	0.257202	0.85783
Q99733	NAP1L4	0.316657	0.125456	-0.310983	1.13294	0.257242	0.85783
Q96BQ5	CCDC127	-0.313657	0.138646	0.311957	-1.12755	0.259512	0.863605
Q9H4G4	GLIPR2	-0.309953	0.176074	0.276173	-1.12543	0.260408	0.863709
P35998	PSMC2	0.31281	0.201193	-0.129275	1.12493	0.26062	0.863709
Q9BTW9	TBCD	0.307331	0.189446	-0.126519	1.12249	0.261654	0.864795
P10599	TXN	-0.312061	0.110199	0.437285	-1.12049	0.262506	0.864795
Q7Z3B1	NEGR1	-0.306693	0.142519	0.391407	-1.11752	0.263775	0.864795
P12036	NEFH	-0.308306	0.154529	0.246407	-1.11674	0.264106	0.864795
O75508	CLDN11	-0.307075	0.138923	0.243229	-1.11666	0.264141	0.864795
Q9BZV1	UBXN6	-0.305131	0.218537	0.463294	-1.11656	0.264183	0.864795
O76003	GLRX3	0.305182	0.166242	-0.218812	1.11405	0.265257	0.866542
P42263	GRIA3	-0.305477	0.198724	0.491856	-1.11221	0.26605	0.867366
P22059	OSBP	0.306899	0.157653	-0.186449	1.10678	0.26839	0.87322
Q9NX63	CHCHD3	-0.301466	0.121945	0.337981	-1.10394	0.269621	0.875451
P53621	COPA	0.302498	0.229655	-0.0787912	1.10148	0.270688	0.87714
P60201	PLP1	-0.300521	0.183287	0.240596	-1.1001	0.271292	0.877324
Q9Y217	MTMR6	-0.299262	0.184181	0.403668	-1.09625	0.272973	0.880169
P78356	PIP4K2B	0.299052	0.22809	-0.138829	1.09301	0.27439	0.880169
Q12756	KIF1A	0.298895	0.21343	-0.0999219	1.09233	0.274691	0.880169
Q969L2	MAL2	-0.301573	0.192073	0.337753	-1.09223	0.274732	0.880169
P06753	TPM3	-0.299588	0.10641	0.348933	-1.08972	0.27584	0.880169
Q86VU5	COMTD1	0.307844	0.28963	-0.130566	1.08728	0.276914	0.880169
Q99460	PSMD1	0.298117	0.246353	-0.062417	1.08662	0.277206	0.880169
O43617	TRAPPC3	-0.301935	0.163784	0.398984	-1.08648	0.27727	0.880169
Q8WVJ2	NUDCD2	0.296561	0.129053	-0.277026	1.08641	0.277299	0.880169
Q86W74	ANKRD46	0.296711	0.148685	-0.229712	1.0856	0.277659	0.880169
Q16181	SEPTIN7	-0.296034	0.203753	0.377872	-1.08402	0.278357	0.880641
O60884	DNAJA2	-0.30135	0.105141	0.363069	-1.07865	0.280743	0.88103
P49588	AARS1	0.294695	0.218253	-0.146796	1.07862	0.280758	0.88103
P09104	ENO2	-0.294407	0.0717244	0.251986	-1.07757	0.281228	0.88103
P07954	FH	0.297067	0.115153	-0.269229	1.07678	0.281578	0.88103
P13647	KRT5	-0.2935	0.137055	0.455782	-1.07472	0.282502	0.88103
O60381	HBP1	0.297264	0.231204	-0.110017	1.0707	0.284305	0.88103
Q8N5N7	MRPL50	-0.29252	0.129908	0.348633	-1.07054	0.284376	0.88103
Q9NRZ7	AGPAT3	0.295875	0.245007	-0.0982004	1.06742	0.285782	0.88103
Q9BXF6	RAB11FIP5	0.297946	0.237288	-0.121142	1.06581	0.286512	0.88103
Q9Y2J0	RPH3A	-0.295989	0.155448	0.448528	-1.06489	0.286927	0.88103
Q96MC5	BMERB1	0.290854	0.234208	-0.133421	1.06471	0.287008	0.88103
Q99490	AGAP2	-0.291294	0.212563	0.464419	-1.06391	0.287371	0.88103
P61026	RAB10	-0.296761	0.119218	0.319859	-1.06374	0.287449	0.88103
O43426	SYNJ1	0.291386	0.168291	-0.144931	1.06354	0.287539	0.88103
Q14642	INPP5A	-0.299681	0.145359	0.352357	-1.06243	0.28804	0.88103
Q5SQI0	ATAT1	-0.292393	0.196039	0.41715	-1.05961	0.289323	0.88103
P49207	RPL34	-0.294824	0.152623	0.344509	-1.05941	0.289413	0.88103
Q12979	ABR	-0.294336	0.218407	0.499936	-1.05873	0.289725	0.88103
P51149	RAB7A	-0.289822	0.139895	0.273159	-1.05819	0.28997	0.88103
Q9UPQ0	LIMCH1	-0.293107	0.191346	0.380423	-1.05559	0.291158	0.88103
P62333	PSMC6	0.291437	0.251219	-0.058414	1.0548	0.291517	0.88103
O14950	MYL12B	-0.294612	0.128072	0.341832	-1.0546	0.291611	0.88103
P00338	LDHA	-0.289617	0.20891	0.367843	-1.0545	0.291655	0.88103
P27144	AK4	0.288568	0.216036	-0.120392	1.05428	0.291758	0.88103
Q8N573	OXR1	0.289095	0.167637	-0.155026	1.0501	0.293675	0.88103
P35527	KRT9	-0.289254	0.140899	0.438628	-1.04987	0.29378	0.88103
Q9H8H3	METTL7A	0.298129	0.128433	-0.241899	1.04748	0.294878	0.88103
O94819	KBTBD11	0.28685	0.216079	-0.0883969	1.04065	0.298039	0.88103
O75323	NIPSNAP2	0.285091	0.152125	-0.137293	1.04019	0.298252	0.88103
O75689	ADAP1	0.295069	0.262703	-0.117029	1.03995	0.298363	0.88103
Q9NRW7	VPS45	0.283913	0.197169	-0.128462	1.03961	0.298523	0.88103
Q96HS1	PGAM5	-0.290256	0.199279	0.433478	-1.03858	0.299001	0.88103
P09543	CNP	-0.28326	0.183331	0.266369	-1.03664	0.299905	0.88103
Q9BWM7	SFXN3	-0.28344	0.0599062	0.307077	-1.03502	0.300662	0.88103
P05141	SLC25A5	-0.289099	0.143954	0.36183	-1.03427	0.301013	0.88103
Q9NPD7	NRN1	-0.282305	0.119454	0.318571	-1.03341	0.301415	0.88103
Q9UHD2	TBK1	-0.286791	0.239726	0.483339	-1.03149	0.302312	0.88103
Q9UQ03	CORO2B	0.281705	0.201074	-0.111634	1.03079	0.302642	0.88103
Q9UPY8	MAPRE3	0.281282	0.141214	-0.240048	1.03035	0.302848	0.88103
P42356	PI4KA	0.281107	0.240709	-0.00820699	1.0298	0.303106	0.88103
Q8N766	EMC1	-0.280972	0.119247	0.304707	-1.02793	0.303984	0.88103
P61020	RAB5B	-0.280637	0.125111	0.311456	-1.02777	0.30406	0.88103
P31948	STIP1	0.283871	0.176332	-0.308051	1.02751	0.304184	0.88103
P00505	GOT2	-0.284243	0.214643	0.337266	-1.02524	0.305252	0.88103
Q9Y512	SAMM50	-0.282951	0.167296	0.365383	-1.02439	0.305651	0.88103
P55209	NAP1L1	0.280432	0.152402	-0.221238	1.02157	0.306988	0.88103
O15083	ERC2	-0.280182	0.16717	0.403521	-1.02055	0.307468	0.88103
P09382	LGALS1	0.279179	0.0931702	-0.244309	1.02013	0.30767	0.88103
Q8IV01	SYT12	-0.284725	0.179359	0.455265	-1.01856	0.308413	0.88103
Q14894	CRYM	0.278098	0.113111	-0.0606558	1.01706	0.309126	0.88103
P20020	ATP2B1	0.277486	0.138432	-0.228315	1.01659	0.309349	0.88103
O60716	CTNND1	-0.281363	0.193543	0.461073	-1.01568	0.309783	0.88103
O43837	IDH3B	0.277885	0.156521	-0.209717	1.01548	0.30988	0.88103
Q27J81	INF2	-0.28366	0.181063	0.365178	-1.01414	0.310516	0.88103
Q9HCM2	PLXNA4	0.280362	0.14848	-0.233671	1.01091	0.312061	0.88103
Q9P0K9	FRRS1L	-0.276844	0.0833892	0.30306	-1.01089	0.312072	0.88103
Q15369	ELOC	0.282745	0.179106	-0.151858	1.01029	0.312358	0.88103
Q9UHQ9	CYB5R1	-0.279206	0.194331	0.376056	-1.0099	0.312545	0.88103
O43272	PRODH	0.281834	0.196812	-0.104956	1.00981	0.312589	0.88103
P49458	SRP9	-0.281532	0.0807339	0.19651	-1.00937	0.312798	0.88103
Q92974	ARHGEF2	-0.276765	0.223068	0.457629	-1.00896	0.312994	0.88103
Q9Y4G6	TLN2	0.276092	0.254438	-0.0475645	1.0074	0.313744	0.88103
Q9BV35	SLC25A23	-0.284626	0.174364	0.459651	-1.00713	0.313872	0.88103
P61106	RAB14	-0.281869	0.101341	0.268877	-1.00604	0.314396	0.88103
Q07065	CKAP4	-0.279577	0.0866678	0.332354	-1.00544	0.314687	0.88103
O14490	DLGAP1	-0.277647	0.241712	0.472865	-1.00534	0.314732	0.88103
Q5T2T1	MPP7	-0.275268	0.117366	0.277065	-1.00321	0.315762	0.881243
Q14194	CRMP1	0.273687	0.178048	-0.110012	1.00245	0.31613	0.881243
P62760	VSNL1	-0.274768	0.138126	0.263978	-1.00177	0.316456	0.881243
P10915	HAPLN1	-0.275845	0.0985524	0.235151	-0.99942	0.317592	0.882425
Q14254	FLOT2	-0.275503	0.0914169	0.314004	-0.998618	0.317981	0.882425
Q15773	MLF2	-0.273881	0.130336	0.328391	-0.996205	0.319152	0.883092
Q9NVA2	SEPTIN11	-0.271951	0.18612	0.370753	-0.995853	0.319323	0.883092
Q8WXF7	ATL1	0.271598	0.137391	-0.194179	0.993021	0.320701	0.884203
Q08495	DMTN	-0.271884	0.213738	0.395809	-0.992763	0.320827	0.884203
Q06830	PRDX1	-0.269264	0.163626	0.289577	-0.986514	0.323882	0.891093
P29966	MARCKS	-0.268629	0.0571673	0.309467	-0.983453	0.325386	0.89364
Q92598	HSPH1	0.268759	0.131775	-0.192768	0.982363	0.325922	0.89364
O00487	PSMD14	0.277976	0.217095	-0.115849	0.97886	0.32765	0.89478
P05091	ALDH2	-0.267183	0.204421	0.278386	-0.978253	0.327951	0.89478
Q15008	PSMD6	0.272161	0.176059	-0.126039	0.978129	0.328012	0.89478
P25789	PSMA4	-0.276813	0.142155	0.280532	-0.976017	0.329057	0.895804
Q13509	TUBB3	0.266919	0.172018	-0.0472473	0.975116	0.329504	0.895804
Q92686	NRGN	-0.272842	0.194028	0.439682	-0.973155	0.330478	0.896931
Q53H12	AGK	-0.266245	0.133076	0.393835	-0.971544	0.331278	0.897586
Q9ULD0	OGDHL	0.265857	0.267873	-0.0480517	0.969645	0.332225	0.897691
P32004	L1CAM	0.269159	0.0460074	-0.280429	0.968713	0.33269	0.897691
O14523	C2CD2L	-0.267905	0.203556	0.43279	-0.966569	0.333761	0.897691
Q9UKU0	ACSL6	0.267316	0.162477	-0.180186	0.966466	0.333812	0.897691
P43686	PSMC4	0.264419	0.214637	-0.129684	0.963196	0.33545	0.897691
Q16698	DECR1	-0.264712	0.131601	0.321602	-0.963024	0.335537	0.897691
Q05639	EEF1A2	0.267625	0.213492	-0.13517	0.962853	0.335622	0.897691
Q53GQ0	HSD17B12	-0.265053	0.161834	0.356889	-0.962405	0.335847	0.897691
Q16653	MOG	-0.264228	0.171372	0.232326	-0.961396	0.336354	0.897691
Q02218	OGDH	0.262161	0.258857	-0.0339902	0.958927	0.337597	0.899155
Q7L523	RRAGA	0.263184	0.182561	-0.0798793	0.956531	0.338805	0.899155
P11233	RALA	-0.26734	0.147276	0.268366	-0.955533	0.339309	0.899155
Q8NC96	NECAP1	0.266388	0.202025	-0.0794878	0.955221	0.339467	0.899155
Q7L0J3	SV2A	-0.260538	0.196705	0.326427	-0.951564	0.341319	0.899155
Q13501	SQSTM1	0.259267	0.106014	-0.281717	0.949779	0.342226	0.899155
P08133	ANXA6	-0.2595	0.209988	0.270593	-0.949524	0.342355	0.899155
Q9Y4L1	HYOU1	0.259737	0.0852305	-0.255422	0.949415	0.342411	0.899155
Q9UII2	ATP5IF1	-0.261435	0.137671	0.251392	-0.949201	0.34252	0.899155
Q00059	TFAM	-0.260963	0.128895	0.346573	-0.948679	0.342785	0.899155
Q99816	TSG101	-0.263218	0.149579	0.3502	-0.948121	0.343069	0.899155
Q8N2F6	ARMC10	-0.261935	0.187934	0.384243	-0.946893	0.343695	0.899325
Q13424	SNTA1	0.258284	0.139602	-0.175025	0.944537	0.344897	0.900573
P29992	GNA11	0.261172	0.192567	-0.126353	0.943758	0.345294	0.900573
P84095	RHOG	-0.2571	0.162059	0.23467	-0.941856	0.346267	0.901644
Q13505	MTX1	-0.258529	0.170952	0.285782	-0.938633	0.34792	0.903719
Q9NNW7	TXNRD2	0.256001	0.197427	-0.07977	0.937563	0.34847	0.903719
Q9C0H9	SRCIN1	-0.255841	0.228641	0.404607	-0.937011	0.348754	0.903719
Q6ZVL6	KIAA1549L	-0.260329	0.147896	0.377907	-0.932545	0.351056	0.906892
Q13613	MTMR1	0.25625	0.255941	-0.0308145	0.932441	0.35111	0.906892
Q9P032	NDUFAF4	0.253706	0.162046	-0.168855	0.926705	0.354081	0.910678
O00231	PSMD11	0.254994	0.19467	-0.127874	0.926008	0.354443	0.910678
Q9UJW0	DCTN4	0.25542	0.192067	-0.143214	0.925438	0.354739	0.910678
Q9Y2V2	CARHSP1	0.253135	0.17415	-0.129864	0.924788	0.355077	0.910678
O75935	DCTN3	0.252401	0.150549	-0.228448	0.923732	0.355627	0.910678
P55060	CSE1L	0.259092	0.15317	-0.113939	0.923051	0.355982	0.910678
O94925	GLS	0.249443	0.173007	-0.148096	0.913438	0.361014	0.913282
Q9BXM9	FSD1L	0.255585	0.194788	-0.1177	0.913294	0.361089	0.913282
Q9NUQ2	AGPAT5	-0.249844	0.185637	0.365399	-0.912438	0.361539	0.913282
O60831	PRAF2	0.253967	0.198415	-0.182161	0.911789	0.361881	0.913282
Q9C040	TRIM2	0.252255	0.124501	-0.192102	0.911725	0.361915	0.913282
Q8N4Q0	ZADH2	0.252571	0.195714	-0.128468	0.911391	0.362091	0.913282
Q12955	ANK3	-0.251387	0.20955	0.388078	-0.909695	0.362984	0.913282
P60953	CDC42	-0.248062	0.144936	0.215294	-0.908794	0.36346	0.913282
P18505	GABRB1	-0.247207	0.0818709	0.298358	-0.905675	0.365109	0.913282
P62191	PSMC1	0.251773	0.219125	-0.0955736	0.903416	0.366306	0.913282
Q01484	ANK2	0.246416	0.227293	-0.0137272	0.90096	0.367611	0.913282
Q5D862	FLG2	-0.247672	0.166614	0.409837	-0.89996	0.368143	0.913282
Q9NVI7	ATAD3A	-0.246251	0.116748	0.275698	-0.898868	0.368724	0.913282
P53667	LIMK1	-0.249295	0.231446	0.415021	-0.898582	0.368877	0.913282
Q96P70	IPO9	0.245957	0.210601	-0.0626104	0.89842	0.368963	0.913282
Q12933	TRAF2	-0.249292	0.17923	0.333907	-0.897364	0.369526	0.913282
P16389	KCNA2	-0.244883	0.18412	0.31682	-0.897056	0.36969	0.913282
P61225	RAP2B	-0.250398	0.0785013	0.254533	-0.897017	0.369711	0.913282
O95248	SBF1	0.245321	0.233495	0.00556195	0.896206	0.370144	0.913282
P40123	CAP2	-0.248257	0.124576	0.318999	-0.896179	0.370159	0.913282
O14531	DPYSL4	0.24486	0.261864	0.00726805	0.895938	0.370287	0.913282
Q9HBF4	ZFYVE1	-0.251479	0.199782	0.408972	-0.89546	0.370542	0.913282
P63000	RAC1	-0.249498	0.181543	0.263001	-0.892975	0.371871	0.913282
O14994	SYN3	-0.245495	0.131632	0.333326	-0.892711	0.372013	0.913282
Q9Y263	PLAA	0.246489	0.214231	-0.124279	0.890859	0.373006	0.913282
Q9NP72	RAB18	-0.244719	0.125092	0.286379	-0.89066	0.373112	0.913282
Q8N9F7	GDPD1	0.245769	0.179997	-0.0970934	0.890502	0.373198	0.913282
Q96RR4	CAMKK2	-0.243015	0.204018	0.433243	-0.890286	0.373314	0.913282
O75899	GABBR2	-0.246884	0.161358	0.363051	-0.888757	0.374135	0.913282
P61088	UBE2N	0.243821	0.0736597	-0.260553	0.888115	0.37448	0.913282
P48556	PSMD8	0.244555	0.222119	-0.083105	0.887798	0.374651	0.913282
Q6P1Q0	LETMD1	-0.248803	0.18717	0.364759	-0.885873	0.375687	0.914236
Q9NQC7	CYLD	-0.243561	0.250008	0.454807	-0.883571	0.376929	0.914236
P36405	ARL3	0.245291	0.0967858	-0.261022	0.882515	0.3775	0.914236
Q6UW68	TMEM205	0.24732	0.0588163	-0.16709	0.882218	0.37766	0.914236
Q9BSJ8	ESYT1	0.241552	0.193813	-0.127409	0.881665	0.377959	0.914236
P78344	EIF4G2	0.241454	0.186439	-0.1076	0.880736	0.378462	0.914236
Q9UNA1	ARHGAP26	0.244638	0.232206	-0.0282641	0.876977	0.3805	0.917778
Q6U841	SLC4A10	-0.239133	0.191789	0.433494	-0.87466	0.38176	0.918245
Q9Y230	RUVBL2	-0.243384	0.100938	0.310261	-0.873557	0.38236	0.918245
Q9ULJ8	PPP1R9A	-0.239051	0.222648	0.380898	-0.872982	0.382674	0.918245
P55786	NPEPPS	0.238815	0.0911136	-0.216559	0.872072	0.38317	0.918245
P04179	SOD2	-0.239222	0.161869	0.245567	-0.871315	0.383583	0.918245
P78357	CNTNAP1	-0.237368	0.204282	0.331902	-0.869292	0.384689	0.918245
Q9P0J7	KCMF1	-0.241155	0.157982	0.248105	-0.868364	0.385196	0.918245
Q9H479	FN3K	0.240955	0.194148	-0.0701282	0.866862	0.386019	0.918245
P13645	KRT10	-0.237007	0.146607	0.40745	-0.866691	0.386113	0.918245
Q92599	SEPTIN8	-0.240784	0.20711	0.32114	-0.866133	0.386419	0.918245
P42704	LRPPRC	0.236344	0.249573	-0.0274596	0.864992	0.387045	0.918372
Q8N9N7	LRRC57	-0.240696	0.208312	0.295975	-0.86338	0.38793	0.919112
P00533	EGFR	0.236563	0.220035	-0.00701111	0.860374	0.389584	0.92167
Q9NX07	TRNAU1AP	0.238781	0.144752	-0.00584411	0.858464	0.390638	0.922802
O75431	MTX2	-0.241695	0.187954	0.323992	-0.857203	0.391334	0.922881
O94826	TOMM70	0.236631	0.202745	-0.114451	0.855601	0.392219	0.922881
O43242	PSMD3	0.233472	0.168768	-0.111366	0.855281	0.392397	0.922881
Q8N608	DPP10	-0.233523	0.163405	0.326076	-0.853103	0.393603	0.924315
Q9Y291	MRPS33	-0.232592	0.100344	0.246884	-0.8521	0.394159	0.924315
Q8NBX0	SCCPDH	-0.231796	0.15449	0.332441	-0.849194	0.395774	0.926747
Q684P5	RAP1GAP2	0.235283	0.240942	-0.0341571	0.846939	0.39703	0.928274
Q96DA6	DNAJC19	-0.232873	0.1048	0.267661	-0.845947	0.397584	0.928274
Q9P2J5	LARS1	0.231741	0.215883	-0.016452	0.844425	0.398433	0.928905
P63244	RACK1	-0.230602	0.0983014	0.218484	-0.841339	0.400159	0.930156
O75170	PPP6R2	0.234334	0.239718	-0.00800298	0.840429	0.400669	0.930156
Q9Y5K8	ATP6V1D	-0.230552	0.0706873	0.231969	-0.83986	0.400988	0.930156
Q9NQ79	CRTAC1	-0.230874	0.146209	0.233752	-0.837383	0.402379	0.930156
Q96PV0	SYNGAP1	-0.23006	0.237381	0.441939	-0.836596	0.402821	0.930156
O94760	DDAH1	0.233255	0.118408	-0.228928	0.836428	0.402915	0.930156
Q8TAC9	SCAMP5	-0.233063	0.0449724	0.245604	-0.835255	0.403575	0.930156
O15020	SPTBN2	0.227859	0.241388	-0.0463645	0.83398	0.404293	0.930156
Q5T848	GPR158	0.231818	0.119479	-0.0971089	0.831665	0.405599	0.930156
P11498	PC	0.226666	0.261671	0.0249698	0.830304	0.406368	0.930156
Q9H329	EPB41L4B	-0.22812	0.190745	0.458166	-0.82889	0.407168	0.930156
Q9Y376	CAB39	-0.228174	0.105887	0.258668	-0.826844	0.408326	0.930156
P52907	CAPZA1	-0.232754	0.145842	0.264041	-0.825872	0.408878	0.930156
Q9UL25	RAB21	-0.226829	0.196239	0.336282	-0.825387	0.409153	0.930156
Q16555	DPYSL2	0.224104	0.216341	-0.0622888	0.821069	0.411608	0.930156
P02794	FTH1	-0.224633	0.210592	0.256844	-0.820717	0.411808	0.930156
O95197	RTN3	0.2288	0.144448	-0.131434	0.820448	0.411962	0.930156
Q7Z406	MYH14	-0.224355	0.208187	0.366277	-0.819071	0.412747	0.930156
P41252	IARS1	0.227967	0.281878	-0.00320915	0.818569	0.413033	0.930156
Q9Y6K8	AK5	-0.223554	0.223592	0.3962	-0.818302	0.413186	0.930156
P07919	UQCRH	0.2244	0.182447	-0.123944	0.817398	0.413702	0.930156
P04632	CAPNS1	-0.226093	0.111449	0.238479	-0.815593	0.414734	0.930156
P53992	SEC24C	0.22251	0.193892	-0.0849399	0.815188	0.414966	0.930156
Q01814	ATP2B2	-0.222403	0.128908	0.258781	-0.814561	0.415325	0.930156
Q92932	PTPRN2	0.224256	0.221866	-0.0467537	0.814504	0.415358	0.930156
P17677	GAP43	-0.226871	0.147349	0.299993	-0.813968	0.415664	0.930156
Q9Y6T7	DGKB	-0.223645	0.166854	0.357844	-0.813937	0.415682	0.930156
P78352	DLG4	-0.2223	0.208558	0.389444	-0.812954	0.416245	0.930156
O75521	ECI2	-0.22521	0.200068	0.354116	-0.811057	0.417334	0.930156
P34897	SHMT2	0.221486	0.200992	-0.015076	0.81034	0.417746	0.930156
P47870	GABRB2	-0.223896	0.0846851	0.267283	-0.809722	0.418101	0.930156
Q9NRD5	PICK1	0.225206	0.224668	0.013179	0.808243	0.418951	0.930156
Q9H7D7	WDR26	-0.220844	0.222568	0.399083	-0.808169	0.418994	0.930156
P55036	PSMD4	0.221807	0.186638	-0.11466	0.808001	0.419091	0.930156
O43581	SYT7	-0.220339	0.150271	0.308516	-0.803619	0.421618	0.930156
Q96HU8	DIRAS2	-0.22005	0.176058	0.288744	-0.802935	0.422013	0.930156
O43583	DENR	0.222861	0.205739	-0.0647403	0.802273	0.422396	0.930156
Q9Y4P3	TBL2	-0.219387	0.202808	0.355467	-0.801505	0.42284	0.930156
Q9GZV7	HAPLN2	-0.218731	0.150502	0.155609	-0.801401	0.422901	0.930156
P07237	P4HB	0.219426	0.098828	-0.140845	0.801104	0.423072	0.930156
Q8IU85	CAMK1D	-0.219398	0.218288	0.377683	-0.801076	0.423089	0.930156
Q9H4B0	OSGEPL1	0.221462	0.211746	-0.0475601	0.800038	0.42369	0.930156
P55039	DRG2	0.217967	0.187134	-0.101559	0.798576	0.424537	0.930156
P56378	ATP5MJ	-0.219558	0.0518386	0.205033	-0.798306	0.424694	0.930156
Q15286	RAB35	-0.218954	0.141563	0.25891	-0.79711	0.425388	0.930156
Q9UHQ4	BCAP29	-0.21903	0.0171835	0.234036	-0.796668	0.425645	0.930156
Q66LE6	PPP2R2D	0.217303	0.159817	-0.11554	0.795532	0.426305	0.930332
P37235	HPCAL1	-0.219241	0.147292	0.281357	-0.790816	0.429053	0.930721
P51649	ALDH5A1	-0.216457	0.218869	0.354146	-0.78971	0.429698	0.930721
P17980	PSMC3	0.216212	0.226252	-0.0284423	0.789264	0.429959	0.930721
P61981	YWHAG	0.216771	0.0962111	-0.181852	0.789186	0.430004	0.930721
Q15334	LLGL1	-0.217819	0.135567	0.260441	-0.788597	0.430349	0.930721
Q16799	RTN1	0.218746	0.145741	-0.141523	0.786846	0.431373	0.930721
P14867	GABRA1	-0.217653	0.140472	0.319573	-0.785108	0.432391	0.930721
Q9UDY4	DNAJB4	-0.218602	0.186453	0.363751	-0.784255	0.432892	0.930721
P41222	PTGDS	-0.216902	0.134417	0.151467	-0.782476	0.433936	0.930721
P09001	MRPL3	-0.217534	0.14229	0.366579	-0.781368	0.434587	0.930721
P00558	PGK1	0.213195	0.158193	-0.171087	0.779378	0.435758	0.930721
Q9GZS3	WDR61	-0.214946	0.165752	0.308881	-0.779188	0.43587	0.930721
Q9P0L0	VAPA	-0.213048	0.219403	0.317083	-0.77755	0.436835	0.930721
P06576	ATP5F1B	-0.212722	0.105178	0.190364	-0.777544	0.436839	0.930721
P13611	VCAN	-0.212301	0.135283	0.154126	-0.775906	0.437806	0.930721
P80723	BASP1	-0.211529	0.124605	0.210779	-0.774931	0.438382	0.930721
Q9Y2C4	EXOG	-0.21945	0.206627	0.284604	-0.774135	0.438852	0.930721
Q9UQB8	BAIAP2	-0.21182	0.221746	0.387745	-0.773514	0.439219	0.930721
Q08752	PPID	0.211483	0.120747	-0.170215	0.76985	0.44139	0.930721
Q6KCM7	SLC25A25	-0.214	0.0155068	0.201071	-0.768735	0.442052	0.930721
Q9H6K4	OPA3	-0.209729	0.210339	0.262409	-0.768112	0.442421	0.930721
O94811	TPPP	0.210081	0.211948	-0.0656451	0.767709	0.442661	0.930721
Q6P9B6	MEAK7	-0.213218	0.145026	0.299034	-0.767482	0.442796	0.930721
Q86TP1	PRUNE1	0.213051	0.189885	-0.013691	0.76664	0.443296	0.930721
Q5T5P2	KIAA1217	-0.209796	0.169838	0.32496	-0.766436	0.443418	0.930721
Q7L5D6	GET4	-0.212614	0.117562	0.255394	-0.766153	0.443586	0.930721
Q9NRP0	OSTC	0.213975	0.178804	-0.125139	0.765446	0.444007	0.930721
Q96P47	AGAP3	-0.213131	0.191129	0.37931	-0.765072	0.44423	0.930721
Q8WY22	BRI3BP	-0.212684	0.000833629	0.143637	-0.759964	0.447277	0.930721
O00186	STXBP3	0.207353	0.198249	-0.072502	0.759644	0.447468	0.930721
Q04837	SSBP1	-0.212833	0.0686474	0.195579	-0.759569	0.447513	0.930721
P13639	EEF2	0.208336	0.165835	-0.0417727	0.75793	0.448494	0.930721
Q96CW1	AP2M1	0.206575	0.192083	-0.0162243	0.754435	0.450589	0.930721
Q9UPT5	EXOC7	0.20659	0.239445	-0.0231332	0.754022	0.450837	0.930721
Q9UGM6	WARS2	-0.209164	0.136689	0.276485	-0.753891	0.450916	0.930721
P16112	ACAN	-0.20635	0.0476534	0.0767696	-0.753733	0.45101	0.930721
Q8N1I0	DOCK4	-0.210968	0.220872	0.456716	-0.752363	0.451834	0.930721
P43490	NAMPT	-0.207318	0.111269	0.276075	-0.752105	0.451989	0.930721
P17858	PFKL	0.205795	0.222756	0.0223941	0.752061	0.452015	0.930721
Q08257	CRYZ	0.206586	0.122508	-0.14216	0.751742	0.452207	0.930721
Q9ULH1	ASAP1	0.205527	0.215876	0.0310335	0.750996	0.452656	0.930721
O60313	OPA1	-0.20492	0.1663	0.329975	-0.750388	0.453022	0.930721
P10636	MAPT	0.207192	0.133611	-0.122285	0.749226	0.453722	0.930721
Q9BWS9	CHID1	0.210527	0.238448	0.0807002	0.747365	0.454844	0.930721
Q15173	PPP2R5B	0.208094	0.196599	-0.0622416	0.746465	0.455388	0.930721
P14868	DARS1	0.204653	0.186295	-0.0826242	0.746462	0.455389	0.930721
Q96NN9	AIFM3	0.206011	0.120596	-0.161153	0.744964	0.456294	0.930721
P82663	MRPS25	-0.207319	0.211043	0.383118	-0.743792	0.457003	0.930721
O95747	OXSR1	-0.203017	0.207436	0.356939	-0.743724	0.457044	0.930721
Q9NQC3	RTN4	0.202686	0.136838	-0.134116	0.742557	0.457751	0.930721
P46821	MAP1B	-0.202952	0.192012	0.323892	-0.741239	0.458549	0.930721
O60641	SNAP91	0.206787	0.113345	-0.0938351	0.74115	0.458604	0.930721
P42345	MTOR	0.202128	0.251052	0.0710703	0.740491	0.459003	0.930721
P20339	RAB5A	-0.204575	0.107225	0.225321	-0.73985	0.459392	0.930721
Q9Y3D6	FIS1	-0.203273	0.126955	0.202338	-0.737926	0.46056	0.930721
O75955	FLOT1	-0.201443	0.0890215	0.262696	-0.737464	0.460841	0.930721
O43169	CYB5B	-0.202068	0.0606053	0.204824	-0.736614	0.461358	0.930721
Q96JG6	VPS50	0.203639	0.230728	-0.0170934	0.735433	0.462077	0.930721
Q92556	ELMO1	-0.201023	0.217419	0.354427	-0.735031	0.462322	0.930721
Q9UI09	NDUFA12	-0.200254	0.0741292	0.207757	-0.733273	0.463393	0.930721
P04216	THY1	-0.204511	0.164174	0.235811	-0.732767	0.463701	0.930721
P31153	MAT2A	0.201143	0.178913	-0.175322	0.732119	0.464097	0.930721
O43301	HSPA12A	-0.200692	0.207727	0.338019	-0.73182	0.46428	0.930721
P63151	PPP2R2A	0.202893	0.15891	-0.0706861	0.731156	0.464685	0.930721
P60660	MYL6	-0.20441	0.183102	0.324443	-0.731148	0.46469	0.930721
Q14318	FKBP8	-0.19967	0.198241	0.371408	-0.730752	0.464932	0.930721
Q9BRT3	MIEN1	0.200519	0.105408	-0.209821	0.729581	0.465647	0.930721
P21397	MAOA	0.199293	-0.000939192	-0.127474	0.729101	0.465941	0.930721
O95831	AIFM1	-0.198217	0.183601	0.283151	-0.726134	0.467757	0.932076
P20073	ANXA7	-0.198327	0.201447	0.182821	-0.726095	0.467781	0.932076
Q9UM22	EPDR1	0.197871	0.274581	-0.0114681	0.724653	0.468666	0.932679
Q16836	HADH	-0.198271	0.14196	0.204003	-0.723225	0.469542	0.933266
P05090	APOD	-0.196982	0.183252	0.213246	-0.719585	0.471781	0.934003
P31689	DNAJA1	-0.196316	0.126031	0.261346	-0.719212	0.472011	0.934003
P53779	MAPK10	0.196327	0.220181	-0.0197511	0.718842	0.472239	0.934003
Q8N1G4	LRRC47	0.195402	0.26096	0.0290475	0.715597	0.474241	0.934003
Q02153	GUCY1B1	0.195735	0.181438	0.00319833	0.715144	0.474521	0.934003
Q14141	SEPTIN6	0.196148	0.227841	-0.0209123	0.714849	0.474703	0.934003
Q15365	PCBP1	0.19528	0.215452	-0.0669924	0.714081	0.475178	0.934003
Q13492	PICALM	-0.19642	0.207395	0.271215	-0.713557	0.475502	0.934003
O60493	SNX3	-0.19551	0.142351	0.277995	-0.713481	0.475549	0.934003
Q96CV9	OPTN	-0.198459	0.251753	0.421531	-0.713179	0.475736	0.934003
P23763	VAMP1	0.197462	0.042496	-0.258027	0.711597	0.476715	0.934637
Q16864	ATP6V1F	-0.196031	0.0757495	0.188515	-0.710776	0.477224	0.934637
O43639	NCK2	0.195609	0.132589	-0.103686	0.707178	0.479457	0.937864
P78559	MAP1A	-0.193214	0.198866	0.270069	-0.705431	0.480543	0.938843
A0MZ66	SHTN1	0.191512	0.168192	-0.123116	0.701665	0.482889	0.939391
Q13619	CUL4A	0.193104	0.207877	-0.0568441	0.700721	0.483478	0.939391
P61163	ACTR1A	0.191779	0.168813	-0.107852	0.698955	0.484581	0.939391
Q9UJF2	RASAL2	-0.19051	0.270465	0.433052	-0.697893	0.485245	0.939391
P46379	BAG6	-0.191223	0.244058	0.354272	-0.696852	0.485896	0.939391
Q99250	SCN2A	0.191358	0.233758	0.0382665	0.696257	0.486269	0.939391
Q00839	HNRNPU	-0.18923	0.192595	0.312047	-0.693144	0.48822	0.939391
Q96F07	CYFIP2	0.189132	0.207372	0.0617258	0.692191	0.488819	0.939391
Q9Y3S1	WNK2	0.19127	0.262542	0.105796	0.690525	0.489865	0.939391
P12235	SLC25A4	-0.193716	0.200683	0.331243	-0.690491	0.489887	0.939391
P31040	SDHA	0.192291	0.264467	0.00297903	0.690167	0.49009	0.939391
Q96EY1	DNAJA3	-0.188412	0.116646	0.241839	-0.689239	0.490674	0.939391
Q86SX6	GLRX5	0.188611	0.138011	-0.145439	0.68895	0.490855	0.939391
Q9P260	RELCH	0.188171	0.233707	0.00650734	0.687926	0.4915	0.939391
Q9NVH1	DNAJC11	-0.189363	0.17303	0.280111	-0.687497	0.491771	0.939391
P09493	TPM1	-0.193018	0.0808405	0.245903	-0.687137	0.491997	0.939391
O95741	CPNE6	0.188313	0.237973	-0.00724127	0.686892	0.492152	0.939391
O95782	AP2A1	0.188747	0.213424	0.0229097	0.68655	0.492367	0.939391
Q8N414	PGBD5	-0.187814	0.199582	0.358858	-0.686449	0.492431	0.939391
Q15811	ITSN1	0.188609	0.220062	-0.0169805	0.686282	0.492536	0.939391
Q5VUB5	FAM171A1	-0.18827	0.226765	0.330965	-0.683677	0.49418	0.940771
P17987	TCP1	0.18675	0.208186	0.00555624	0.682305	0.495047	0.940771
Q15006	EMC2	-0.190123	0.0712638	0.195678	-0.681521	0.495542	0.940771
O14495	PLPP3	-0.189915	0.129619	0.215192	-0.680533	0.496168	0.940771
Q14008	CKAP5	0.185991	0.252064	0.0392115	0.679221	0.496999	0.940771
P22392	NME2	-0.189276	0.118299	0.107447	-0.677614	0.498017	0.940771
P54619	PRKAG1	-0.188829	0.22127	0.33656	-0.676372	0.498805	0.940771
P25398	RPS12	-0.184828	0.173297	0.244782	-0.676031	0.499022	0.940771
Q12797	ASPH	0.185637	0.117596	-0.0922471	0.67586	0.499131	0.940771
Q9Y484	WDR45	-0.190624	0.167267	0.318476	-0.675716	0.499222	0.940771
Q9UEW8	STK39	-0.18478	0.241913	0.380336	-0.674945	0.499711	0.940771
P35908	KRT2	-0.184336	0.181068	0.362116	-0.673739	0.500478	0.941109
P14618	PKM	-0.1837	0.203786	0.288598	-0.672694	0.501143	0.941257
Q15436	SEC23A	0.184047	0.198121	-0.0216786	0.671576	0.501854	0.94149
P25786	PSMA1	-0.190167	0.137942	0.233029	-0.667766	0.504284	0.943333
Q8NCB2	CAMKV	-0.182535	0.214269	0.376411	-0.666523	0.505078	0.943333
P57737	CORO7	-0.182067	0.229495	0.354781	-0.666465	0.505115	0.943333
Q9P1A6	DLGAP2	-0.18478	0.231871	0.415484	-0.665952	0.505442	0.943333
O94973	AP2A2	0.183431	0.224678	0.00490111	0.661231	0.508465	0.943333
P10909	CLU	0.180978	0.0279508	-0.27506	0.659739	0.509422	0.943333
P32119	PRDX2	-0.181544	0.166054	0.262636	-0.659202	0.509767	0.943333
Q9BQI5	SGIP1	-0.179818	0.152197	0.314338	-0.657257	0.511017	0.943333
Q9Y224	RTRAF	-0.18295	0.17403	0.207563	-0.654611	0.512719	0.943333
P15531	NME1	-0.181326	0.159002	0.243609	-0.654374	0.512872	0.943333
P51991	HNRNPA3	0.179148	0.164771	-0.0298616	0.654169	0.513004	0.943333
Q9UHV9	PFDN2	0.178411	0.166134	0.00356071	0.652957	0.513785	0.943333
Q15555	MAPRE2	-0.178613	0.184453	0.287098	-0.652705	0.513947	0.943333
P61604	HSPE1	-0.178829	0.142029	0.151353	-0.652509	0.514073	0.943333
Q92747	ARPC1A	0.180734	0.20565	-0.0167908	0.651022	0.515033	0.943333
Q86VP6	CAND1	-0.177604	0.161855	0.311079	-0.649789	0.515829	0.943333
P99999	CYCS	0.180891	0.122405	-0.0714234	0.649348	0.516114	0.943333
P11142	HSPA8	-0.177271	0.186475	0.193126	-0.648962	0.516363	0.943333
P55196	AFDN	-0.181576	0.202656	0.28982	-0.646728	0.517809	0.943333
O75110	ATP9A	-0.178458	0.11927	0.232993	-0.644802	0.519056	0.943333
O15075	DCLK1	-0.177756	0.208057	0.345465	-0.644411	0.51931	0.943333
Q5XKP0	MICOS13	-0.178249	0.176604	0.271284	-0.643868	0.519662	0.943333
Q7Z6G8	ANKS1B	-0.175956	0.225988	0.370316	-0.643594	0.519839	0.943333
P13987	CD59	-0.175997	0.113558	0.139122	-0.642615	0.520475	0.943333
P34932	HSPA4	-0.175883	0.0931445	0.231302	-0.641639	0.521108	0.943333
P03915	MT-ND5	-0.178516	0.0853939	0.219516	-0.640853	0.521619	0.943333
Q96PU5	NEDD4L	-0.178642	0.257851	0.425945	-0.639587	0.522442	0.943333
O15498	YKT6	0.174787	0.126524	-0.132746	0.638845	0.522925	0.943333
Q9Y4F5	CEP170B	-0.175163	0.211629	0.403294	-0.638681	0.523031	0.943333
O43674	NDUFB5	-0.173907	0.0853179	0.169693	-0.637138	0.524035	0.943333
O96000	NDUFB10	-0.176218	0.093797	0.206162	-0.636029	0.524759	0.943333
Q15120	PDK3	0.175969	0.288056	0.0449269	0.635876	0.524858	0.943333
Q96L92	SNX27	0.177208	0.226275	0.00850594	0.635623	0.525023	0.943333
P62820	RAB1A	-0.175621	0.0779881	0.142623	-0.634217	0.52594	0.943333
Q8TCZ2	CD99L2	-0.179785	0.068729	0.203186	-0.633278	0.526553	0.943333
Q9Y296	TRAPPC4	-0.176914	0.135929	0.267153	-0.632283	0.527203	0.943333
O14773	TPP1	-0.172834	0.255113	0.270663	-0.632212	0.527249	0.943333
P21291	CSRP1	-0.172578	0.125997	0.137149	-0.632014	0.527379	0.943333
Q8NDA8	MROH1	0.173705	0.251984	0.0927705	0.629993	0.5287	0.943333
Q5VIR6	VPS53	0.175223	0.218312	0.022506	0.629969	0.528716	0.943333
Q6P2I7	EBLN2	0.171784	0.0769499	-0.110573	0.629394	0.529092	0.943333
Q6UWE0	LRSAM1	-0.171863	0.200976	0.302137	-0.629265	0.529176	0.943333
Q96A35	MRPL24	-0.172293	0.202021	0.35057	-0.6292	0.529219	0.943333
O95139	NDUFB6	-0.171737	0.0472382	0.179715	-0.628629	0.529593	0.943333
O00471	EXOC5	0.171611	0.236334	0.0103989	0.626833	0.530769	0.943333
P61978	HNRNPK	0.171319	0.143766	-0.125585	0.626679	0.53087	0.943333
Q9H425	C1orf198	-0.172069	0.170068	0.179743	-0.626617	0.530911	0.943333
P48047	ATP5PO	-0.171717	0.139038	0.217449	-0.624838	0.532078	0.943333
P06748	NPM1	-0.170846	0.174917	0.245562	-0.623811	0.532752	0.943333
Q5T4S7	UBR4	0.170497	0.208982	0.0492652	0.623565	0.532914	0.943333
Q08209	PPP3CA	-0.171074	0.150804	0.287825	-0.623476	0.532973	0.943333
Q9UDY2	TJP2	-0.171157	0.150043	0.144704	-0.62243	0.53366	0.943333
P09471	GNAO1	-0.170245	0.125533	0.189042	-0.621903	0.534007	0.943333
Q8N6T3	ARFGAP1	0.170456	0.226107	0.0657903	0.620936	0.534642	0.943417
Q14204	DYNC1H1	0.169	0.227333	0.0498942	0.617602	0.536838	0.944663
Q8IZP0	ABI1	0.168499	0.135252	-0.0553178	0.617243	0.537076	0.944663
P62140	PPP1CB	0.170573	0.195686	-0.0341813	0.617019	0.537223	0.944663
P45880	VDAC2	-0.169268	0.190504	0.250929	-0.615184	0.538434	0.944663
P48426	PIP4K2A	0.16854	0.207419	-0.114006	0.614687	0.538762	0.944663
P40939	HADHA	0.167824	0.265654	-0.0281644	0.614505	0.538882	0.944663
Q9H4G0	EPB41L1	0.168435	0.203434	0.0049639	0.612112	0.540464	0.946402
Q6VY07	PACS1	-0.166651	0.162247	0.338475	-0.609591	0.542134	0.947321
Q96C19	EFHD2	0.170384	0.105142	-0.121247	0.609536	0.54217	0.947321
P35240	NF2	-0.165812	0.167526	0.225962	-0.607185	0.543729	0.948823
P08195	SLC3A2	-0.168955	0.0751084	0.207415	-0.60603	0.544496	0.948823
Q7L099	RUFY3	-0.166766	0.221997	0.310239	-0.605565	0.544804	0.948823
Q96QG7	MTMR9	-0.166294	0.194445	0.337847	-0.599729	0.548688	0.950746
Q9Y3A3	MOB4	0.163441	0.173126	-0.0807104	0.59879	0.549313	0.950746
O60506	SYNCRIP	0.165734	0.0959461	-0.147921	0.598735	0.549351	0.950746
O00170	AIP	-0.16361	0.0628135	0.192006	-0.598433	0.549551	0.950746
Q9HB21	PLEKHA1	-0.165839	0.175679	0.263614	-0.59815	0.549741	0.950746
P51798	CLCN7	0.167472	0.225029	-0.00811249	0.597974	0.549858	0.950746
P56556	NDUFA6	-0.163825	0.0853131	0.171013	-0.594844	0.551949	0.950746
Q8IV38	ANKMY2	-0.162938	0.165343	0.288002	-0.594672	0.552063	0.950746
Q9Y2G0	EFR3B	0.16354	0.244893	0.0805327	0.594406	0.552241	0.950746
Q13232	NME3	0.162979	0.165752	-0.0436095	0.593941	0.552552	0.950746
Q9BUF5	TUBB6	0.162251	0.223196	0.113079	0.593728	0.552695	0.950746
Q5QNW6	H2BC18	-0.16126	0.157347	0.183747	-0.589205	0.555724	0.950746
P47985	UQCRFS1	-0.163136	0.179496	0.216337	-0.588892	0.555934	0.950746
P10586	PTPRF	-0.160739	0.188965	0.299874	-0.588753	0.556028	0.950746
P09525	ANXA4	-0.162167	0.161483	0.132028	-0.588244	0.556369	0.950746
O96008	TOMM40	-0.160819	0.200132	0.272789	-0.587832	0.556645	0.950746
P05129	PRKCG	-0.16044	0.258561	0.410176	-0.587353	0.556967	0.950746
Q8IYB4	PEX5L	0.161876	0.275093	0.102717	0.586559	0.557501	0.950746
Q8N568	DCLK2	0.160239	0.24019	0.0481077	0.586063	0.557834	0.950746
Q00577	PURA	0.160485	0.164858	-0.0462635	0.585344	0.558317	0.950746
O00767	SCD	-0.163946	0.0704315	0.183921	-0.585287	0.558356	0.950746
P43378	PTPN9	0.164052	0.21009	0.139876	0.580563	0.561536	0.953563
O75044	SRGAP2	0.159326	0.199043	0.0255659	0.578497	0.56293	0.953563
P14621	ACYP2	-0.159237	0.164791	0.186349	-0.575585	0.564896	0.953563
P11277	SPTB	-0.156921	0.239438	0.429067	-0.574891	0.565366	0.953563
P0CG08	GPR89B	0.157359	0.195788	0.0582394	0.574621	0.565549	0.953563
P11586	MTHFD1	0.158481	0.220039	0.0247963	0.574587	0.565571	0.953563
P54829	PTPN5	-0.161007	0.204774	0.360055	-0.573751	0.566137	0.953563
Q9UQ80	PA2G4	0.156827	0.169009	-0.0814336	0.57227	0.56714	0.953563
Q8NBU5	ATAD1	-0.156904	0.192265	0.327901	-0.57178	0.567472	0.953563
Q9UPN3	MACF1	0.155087	0.247028	0.0390096	0.567821	0.570157	0.953563
O75396	SEC22B	0.155352	0.144752	-0.091772	0.567427	0.570425	0.953563
A0FGR8	ESYT2	0.156869	0.228816	-0.00130626	0.567358	0.570472	0.953563
P60709	ACTB	0.154911	0.19025	-0.0193122	0.566908	0.570777	0.953563
Q9BZF1	OSBPL8	-0.155382	0.21448	0.342199	-0.566116	0.571316	0.953563
O15530	PDPK1	0.155712	0.223354	-0.00464644	0.565403	0.5718	0.953563
P82930	MRPS34	-0.154992	0.154896	0.26393	-0.565188	0.571947	0.953563
P53618	COPB1	0.154304	0.239497	0.00760136	0.564265	0.572575	0.953563
O00232	PSMD12	0.15563	0.177546	-0.0198154	0.564141	0.572659	0.953563
O95721	SNAP29	-0.154123	0.148045	0.158693	-0.562749	0.573607	0.953563
O43236	SEPTIN4	-0.15413	0.225203	0.231386	-0.56248	0.573789	0.953563
P62166	NCS1	-0.15509	0.148028	0.116713	-0.562443	0.573815	0.953563
Q9UID3	VPS51	0.154134	0.178549	0.0576808	0.562218	0.573968	0.953563
Q9H3S7	PTPN23	0.153214	0.231507	0.0519422	0.560268	0.575297	0.953563
Q8IZR5	CMTM4	-0.15558	0.124679	0.220049	-0.560128	0.575393	0.953563
Q8WVD5	RNF141	-0.154662	0.172334	0.19413	-0.560072	0.575431	0.953563
P19022	CDH2	-0.15334	0.115032	0.186716	-0.559927	0.57553	0.953563
P62195	PSMC5	0.15497	0.18723	-0.0271725	0.559148	0.576061	0.953563
Q9UPV7	PHF24	-0.154053	0.163056	0.262062	-0.557732	0.577028	0.95407
P43004	SLC1A2	-0.153814	0.049916	0.137492	-0.556957	0.577557	0.95407
Q8NCA5	FAM98A	-0.153349	0.168609	0.21793	-0.55476	0.57906	0.954658
Q5VWJ9	SNX30	-0.151939	0.219213	0.336287	-0.554158	0.579471	0.954658
Q92499	DDX1	-0.152778	0.195299	0.234299	-0.553825	0.579699	0.954658
Q16795	NDUFA9	-0.150439	0.104622	0.182108	-0.551062	0.581592	0.956168
Q86YS7	C2CD5	0.150813	0.258212	0.0847155	0.550747	0.581808	0.956168
Q6UXV4	APOOL	-0.150682	0.190365	0.292588	-0.549701	0.582525	0.956367
O15484	CAPN5	-0.149692	0.182615	0.318956	-0.548217	0.583544	0.957059
Q15233	NONO	-0.150492	0.191268	0.242612	-0.547333	0.58415	0.957076
Q07955	SRSF1	0.151103	0.156857	-0.00829969	0.545593	0.585347	0.958057
Q99832	CCT7	0.149523	0.207864	0.0531988	0.543515	0.586776	0.959418
Q8TBM8	DNAJB14	-0.148627	0.140183	0.212101	-0.541779	0.587971	0.95977
P14927	UQCRB	-0.149069	0.165463	0.17582	-0.541465	0.588188	0.95977
P78417	GSTO1	0.149325	0.0474571	-0.231852	0.539064	0.589843	0.96095
O95674	CDS2	-0.153783	-0.00383505	0.148709	-0.537649	0.59082	0.96095
Q8TD22	SFXN5	-0.153082	0.0362822	0.198798	-0.537445	0.590961	0.96095
Q9Y2A7	NCKAP1	0.146663	0.214584	0.0823164	0.536877	0.591353	0.96095
Q05084	ICA1	0.151122	0.218384	0.0320805	0.536076	0.591907	0.96095
Q9HCD6	TANC2	-0.145953	0.170517	0.341408	-0.534684	0.592869	0.961539
P52943	CRIP2	-0.146457	0.179677	0.305046	-0.532454	0.594412	0.961989
P21796	VDAC1	-0.145797	0.181513	0.232195	-0.529807	0.596247	0.961989
Q9HB71	CACYBP	0.149352	0.103295	-0.104615	0.529463	0.596485	0.961989
Q9NQW6	ANLN	-0.145405	0.186573	0.160319	-0.528946	0.596844	0.961989
Q7Z460	CLASP1	0.146462	0.289944	0.0455784	0.527748	0.597675	0.961989
Q13033	STRN3	-0.147372	0.176457	0.244733	-0.527503	0.597845	0.961989
Q9Y281	CFL2	0.144477	0.113558	-0.163813	0.526445	0.598579	0.961989
Q14643	ITPR1	0.144044	0.211475	0.0413069	0.526018	0.598876	0.961989
Q9Y2J8	PADI2	-0.144647	0.166354	0.195154	-0.525894	0.598963	0.961989
P24588	AKAP5	0.145279	0.24339	0.0610727	0.525333	0.599352	0.961989
P46977	STT3A	0.148497	0.166438	-0.0797494	0.524564	0.599887	0.961989
P60520	GABARAPL2	-0.147579	0.200563	0.210493	-0.523907	0.600344	0.961989
Q4V328	GRIPAP1	-0.143114	0.230118	0.378932	-0.521856	0.601771	0.962242
Q8IXS6	PALM2AKAP2	0.146569	0.22784	0.0933283	0.521253	0.602191	0.962242
Q8N5V2	NGEF	-0.143623	0.191271	0.37631	-0.520694	0.602581	0.962242
Q17R89	ARHGAP44	-0.145743	0.227179	0.353982	-0.519622	0.603328	0.962242
O75489	NDUFS3	-0.141861	0.0948404	0.168779	-0.519374	0.603501	0.962242
P62979	RPS27A	-0.143594	0.0962653	0.18906	-0.517489	0.604816	0.963381
P38117	ETFB	0.140801	0.24552	-0.0343083	0.514959	0.606582	0.964157
Q15904	ATP6AP1	-0.142962	0.088049	0.184495	-0.514756	0.606724	0.964157
Q99719	SEPTIN5	0.141518	0.254327	0.0784586	0.514136	0.607158	0.964157
O75381	PEX14	-0.140176	0.158888	0.25871	-0.513312	0.607733	0.964157
Q9H115	NAPB	0.141035	0.140931	-0.0962711	0.512491	0.608308	0.964157
Q14012	CAMK1	-0.143776	0.224294	0.341626	-0.511352	0.609105	0.96419
Q07002	CDK18	-0.140059	0.227642	0.294984	-0.510743	0.609532	0.96419
P07602	PSAP	0.141185	0.343329	0.129312	0.509054	0.610715	0.96436
Q9UBC2	EPS15L1	0.139438	0.192936	-0.00274742	0.508218	0.611301	0.96436
O75746	SLC25A12	-0.138673	0.119882	0.262824	-0.506709	0.61236	0.96436
Q6PKG0	LARP1	-0.142043	0.210569	0.306984	-0.506675	0.612384	0.96436
P20674	COX5A	-0.138904	0.151881	0.153465	-0.506302	0.612645	0.96436
Q68DU8	KCTD16	0.13865	0.259238	0.0835862	0.50449	0.613917	0.965054
P51570	GALK1	0.13985	0.183646	0.0401476	0.503961	0.61429	0.965054
P36957	DLST	-0.137241	0.171273	0.202739	-0.501841	0.61578	0.965247
Q9P2R3	ANKFY1	0.137181	0.181701	0.0193732	0.501713	0.61587	0.965247
Q01813	PFKP	0.136938	0.231809	0.0957474	0.500537	0.616698	0.965247
O15269	SPTLC1	-0.139808	0.186821	0.243783	-0.500364	0.616819	0.965247
P50991	CCT4	0.13595	0.187561	0.0255356	0.497629	0.618746	0.967318
Q9NV70	EXOC1	0.13847	0.233916	0.066288	0.493575	0.621607	0.970845
Q96CX2	KCTD12	-0.134193	0.155866	0.147229	-0.491063	0.623382	0.971926
P06241	FYN	0.134526	0.220525	0.0263793	0.490579	0.623725	0.971926
Q8TCJ2	STT3B	-0.135963	0.0486547	0.146687	-0.489559	0.624446	0.971926
O43678	NDUFA2	0.133072	0.175625	-0.0276178	0.487501	0.625904	0.971926
Q8WU79	SMAP2	-0.133969	0.21961	0.27564	-0.487284	0.626058	0.971926
Q13561	DCTN2	0.1332	0.102712	-0.156479	0.486951	0.626294	0.971926
P06756	ITGAV	0.134256	0.124203	-0.0870358	0.486602	0.626541	0.971926
Q02156	PRKCE	-0.132691	0.245953	0.372137	-0.482976	0.629114	0.974974
Q8TDC3	BRSK1	-0.132648	0.277932	0.407178	-0.481122	0.630431	0.976072
P21281	ATP6V1B2	0.130876	0.207501	0.050079	0.479174	0.631815	0.976285
Q14515	SPARCL1	0.130628	0.10413	-0.107519	0.478175	0.632526	0.976285
Q9H2H8	PPIL3	0.130446	0.0864613	-0.135419	0.477887	0.632731	0.976285
Q08722	CD47	-0.130884	0.185615	0.169684	-0.477505	0.633003	0.976285
O43854	EDIL3	-0.132502	0.13018	0.0974985	-0.475597	0.634362	0.976912
P62330	ARF6	-0.131618	0.177234	0.217451	-0.474121	0.635414	0.976912
Q9Y287	ITM2B	-0.129764	0.164466	0.0919425	-0.472398	0.636644	0.976912
Q9NZJ7	MTCH1	-0.13209	0.195881	0.249573	-0.471721	0.637126	0.976912
O14807	MRAS	-0.12872	0.0369389	0.141356	-0.471557	0.637243	0.976912
Q86TV6	TTC7B	0.129197	0.161965	0.0534747	0.470427	0.63805	0.976912
Q92743	HTRA1	0.130804	0.103898	-0.171837	0.470292	0.638147	0.976912
Q9H3K2	GHITM	-0.128235	0.0739901	0.16646	-0.468908	0.639136	0.976912
Q13557	CAMK2D	-0.128028	0.243497	0.361894	-0.468884	0.639153	0.976912
Q13825	AUH	-0.128262	0.175304	0.242197	-0.468399	0.6395	0.976912
Q9UPR5	SLC8A2	0.127504	0.196131	0.0372267	0.466833	0.64062	0.977692
Q14C86	GAPVD1	-0.128287	0.188586	0.287821	-0.464254	0.642467	0.9784
Q7Z4W1	DCXR	-0.128783	0.151427	0.250958	-0.463116	0.643281	0.9784
P35222	CTNNB1	-0.126546	0.195266	0.246114	-0.462759	0.643537	0.9784
Q86YQ8	CPNE8	-0.129239	0.169921	0.3062	-0.462298	0.643868	0.9784
P36542	ATP5F1C	-0.125843	0.163426	0.1742	-0.460905	0.644867	0.9784
Q9Y277	VDAC3	-0.12788	0.210753	0.241616	-0.45985	0.645624	0.9784
O14880	MGST3	-0.128048	0.176112	0.230383	-0.459674	0.645751	0.9784
P28331	NDUFS1	0.125588	0.23608	0.0671105	0.459377	0.645964	0.9784
P42224	STAT1	-0.127692	0.224021	0.320583	-0.457259	0.647485	0.979004
P21283	ATP6V1C1	0.12452	0.213294	0.0543859	0.455116	0.649026	0.979004
Q13596	SNX1	0.12817	0.175346	-0.0292216	0.454615	0.649387	0.979004
O75363	BCAS1	-0.123852	0.159133	0.116143	-0.452899	0.650622	0.979004
Q9P0J0	NDUFA13	-0.123497	0.0999784	0.159748	-0.452285	0.651064	0.979004
Q8IWT6	LRRC8A	-0.124655	0.0781916	0.18208	-0.452125	0.65118	0.979004
P48651	PTDSS1	-0.125091	0.138898	0.22021	-0.451078	0.651934	0.979004
Q9Y2Z4	YARS2	-0.12554	0.237752	0.324296	-0.450254	0.652528	0.979004
P19525	EIF2AK2	-0.122684	0.191325	0.264987	-0.448244	0.653978	0.979004
O14576	DYNC1I1	-0.122115	0.179445	0.217809	-0.447361	0.654615	0.979004
P05771	PRKCB	-0.124007	0.24132	0.328597	-0.447099	0.654804	0.979004
P43155	CRAT	0.123268	0.212645	0.0216217	0.446546	0.655204	0.979004
Q14168	MPP2	-0.123847	0.177163	0.284812	-0.446533	0.655213	0.979004
Q9NYI0	PSD3	0.121776	0.169316	0.0166688	0.446113	0.655516	0.979004
P54886	ALDH18A1	0.12378	0.16919	-0.0234272	0.446111	0.655518	0.979004
Q7KZI7	MARK2	-0.122474	0.223573	0.316144	-0.444879	0.656408	0.979422
Q9C0H5	ARHGAP39	-0.122509	0.201948	0.367056	-0.443154	0.657655	0.980371
P12277	CKB	0.120769	0.0746111	-0.133888	0.441889	0.65857	0.980442
Q3ZCQ8	TIMM50	0.120472	0.138319	-0.116073	0.440664	0.659457	0.980442
Q92529	SHC3	-0.121182	0.23916	0.333371	-0.440223	0.659776	0.980442
P07384	CAPN1	-0.122053	0.234818	0.297182	-0.439245	0.660485	0.980442
Q14247	CTTN	-0.120239	0.165034	0.187242	-0.438714	0.66087	0.980442
O94874	UFL1	0.119592	0.223353	0.0703868	0.438022	0.661371	0.980442
Q8N9I9	DTX3	-0.120628	0.263525	0.384398	-0.435923	0.662893	0.980556
Q99747	NAPG	-0.118624	0.159198	0.189552	-0.43174	0.665931	0.980556
Q14457	BECN1	-0.118714	0.136197	0.261818	-0.430506	0.666828	0.980556
P31943	HNRNPH1	-0.118261	0.101296	0.061279	-0.42796	0.668681	0.980556
P49841	GSK3B	0.118402	0.165426	0.0920759	0.426744	0.669566	0.980556
P53985	SLC16A1	-0.118891	0.124165	0.217669	-0.425757	0.670285	0.980556
Q9UDT6	CLIP2	-0.117295	0.221022	0.26038	-0.425735	0.670301	0.980556
Q9Y4E6	WDR7	0.116476	0.235765	0.124422	0.42503	0.670816	0.980556
P15882	CHN1	0.117934	0.158368	-0.0519103	0.424582	0.671142	0.980556
Q9UQM7	CAMK2A	-0.116422	0.240635	0.331877	-0.423536	0.671905	0.980556
Q9Y2E4	DIP2C	0.116861	0.2199	0.0218908	0.419237	0.675044	0.980556
P49802	RGS7	0.116338	0.205517	0.0145001	0.419013	0.675207	0.980556
Q13085	ACACA	0.11662	0.225497	0.108753	0.417886	0.676031	0.980556
P27105	STOM	-0.116641	0.164044	0.161222	-0.417873	0.67604	0.980556
Q9UI12	ATP6V1H	0.114196	0.210968	0.0575722	0.416985	0.67669	0.980556
Q8N0X7	SPART	0.115316	0.20632	0.0378495	0.416496	0.677047	0.980556
Q3SXM5	HSDL1	0.113308	0.181704	0.02525	0.414893	0.678221	0.980556
Q8TDJ6	DMXL2	0.113052	0.265266	0.14343	0.413809	0.679015	0.980556
P51648	ALDH3A2	0.113544	0.202275	-0.031916	0.413359	0.679344	0.980556
Q8TF61	FBXO41	-0.112829	0.226207	0.361238	-0.412541	0.679943	0.980556
Q00169	PITPNA	0.114698	0.215646	0.00432478	0.412311	0.680112	0.980556
Q9P1Y5	CAMSAP3	-0.11238	0.147154	0.256223	-0.40548	0.685126	0.980556
P49815	TSC2	-0.112491	0.220247	0.340676	-0.404583	0.685785	0.980556
Q96N66	MBOAT7	0.110938	0.12918	0.0473651	0.403894	0.686291	0.980556
P12931	SRC	0.110318	0.214689	0.0728885	0.403066	0.6869	0.980556
P59998	ARPC4	0.111093	0.173684	-0.0161108	0.40259	0.68725	0.980556
Q16718	NDUFA5	0.109863	0.194516	0.0136972	0.401458	0.688083	0.980556
Q9Y2S6	TMA7	-0.109392	0.160154	0.165216	-0.400778	0.688584	0.980556
Q9ULC3	RAB23	-0.112183	0.162823	0.216255	-0.40076	0.688597	0.980556
P78527	PRKDC	0.110579	0.164089	0.0894385	0.400011	0.689149	0.980556
Q8N3R9	PALS1	-0.11011	0.210391	0.25435	-0.399616	0.68944	0.980556
Q9BPU6	DPYSL5	-0.110582	0.192324	0.21374	-0.398401	0.690335	0.980556
Q9UGC6	RGS17	-0.109274	0.135023	0.117066	-0.398013	0.690621	0.980556
P15311	EZR	0.109622	0.209771	-0.078127	0.396125	0.692014	0.980556
Q969G6	RFK	-0.109135	0.141783	0.153312	-0.396057	0.692064	0.980556
Q9NZ45	CISD1	-0.109062	0.067842	0.172333	-0.395254	0.692656	0.980556
Q9Y4G8	RAPGEF2	0.10823	0.234115	0.143222	0.395158	0.692727	0.980556
P38606	ATP6V1A	0.109336	0.226251	0.118327	0.394252	0.693395	0.980556
Q9UI15	TAGLN3	-0.108525	0.20945	0.234242	-0.393287	0.694108	0.980556
Q13131	PRKAA1	-0.10801	0.179823	0.251073	-0.392913	0.694384	0.980556
P47736	RAP1GAP	0.107258	0.209531	0.0586417	0.392056	0.695017	0.980556
P49748	ACADVL	0.10697	0.137057	0.0385986	0.391116	0.695712	0.980556
P42765	ACAA2	0.108641	0.122831	-0.0263096	0.390198	0.69639	0.980556
Q9H254	SPTBN4	-0.106472	0.222912	0.281428	-0.389434	0.696955	0.980556
Q8WUH2	TGFBRAP1	-0.107242	0.234527	0.324694	-0.387681	0.698253	0.980556
P20336	RAB3A	0.106885	0.0953632	-0.0454779	0.386932	0.698807	0.980556
O15079	SNPH	0.106531	0.280434	0.162269	0.386871	0.698852	0.980556
O60861	GAS7	-0.110054	0.260069	0.285219	-0.386576	0.699071	0.980556
Q9H2X9	SLC12A5	0.105303	0.245868	0.134192	0.385778	0.699662	0.980556
P37840	SNCA	0.105396	0.00757359	-0.15215	0.385768	0.699669	0.980556
Q9Y450	HBS1L	0.107515	0.173503	0.019752	0.385103	0.700161	0.980556
Q96A65	EXOC4	0.106733	0.222425	0.0915904	0.383794	0.701132	0.980556
O43670	ZNF207	-0.104915	0.16596	0.152941	-0.383596	0.701278	0.980556
P17568	NDUFB7	-0.104565	0.079803	0.119326	-0.382539	0.702062	0.980556
O00401	WASL	-0.104747	0.210408	0.311997	-0.382267	0.702264	0.980556
P35580	MYH10	-0.104805	0.216083	0.314312	-0.381396	0.70291	0.980556
Q9Y5K5	UCHL5	-0.104975	0.167167	0.227625	-0.380538	0.703546	0.980556
P01034	CST3	-0.104765	0.0118246	0.00898483	-0.379492	0.704323	0.980556
Q9H061	TMEM126A	-0.103532	0.0854127	0.142737	-0.379062	0.704642	0.980556
P22695	UQCRC2	-0.103944	0.215865	0.200579	-0.37894	0.704733	0.980556
Q9H9B4	SFXN1	-0.104381	0.0112456	0.157864	-0.378898	0.704764	0.980556
Q9H936	SLC25A22	-0.105389	0.208211	0.29951	-0.378581	0.705	0.980556
P06730	EIF4E	0.105329	0.177401	-0.0757145	0.378446	0.7051	0.980556
Q9UPA5	BSN	-0.103548	0.231208	0.347394	-0.378115	0.705346	0.980556
O43181	NDUFS4	-0.103751	0.101787	0.156657	-0.378004	0.705428	0.980556
P68400	CSNK2A1	0.105309	0.111042	-0.0952672	0.377846	0.705545	0.980556
Q8TC12	RDH11	0.104763	0.188752	0.0670711	0.377598	0.70573	0.980556
Q9HD20	ATP13A1	0.104136	0.26312	0.182259	0.377529	0.705781	0.980556
P49674	CSNK1E	-0.104557	0.179082	0.191057	-0.377385	0.705888	0.980556
Q86UR5	RIMS1	-0.103251	0.233381	0.360049	-0.37721	0.706018	0.980556
P55011	SLC12A2	-0.105652	0.144514	0.14788	-0.376659	0.706428	0.980556
P45974	USP5	-0.103588	0.24159	0.307799	-0.375586	0.707225	0.980556
Q9GZN7	ROGDI	-0.102264	0.190557	0.253961	-0.373904	0.708476	0.980556
Q13875	MOBP	-0.103626	0.0988049	0.0472131	-0.372869	0.709246	0.980556
P21579	SYT1	-0.101712	0.094284	0.190496	-0.372611	0.709439	0.980556
Q8WXD9	CASKIN1	-0.101952	0.211477	0.332304	-0.372524	0.709503	0.980556
Q9H2M9	RAB3GAP2	-0.102327	0.244272	0.325951	-0.371846	0.710008	0.980556
Q13813	SPTAN1	-0.101511	0.213635	0.209579	-0.371799	0.710043	0.980556
Q9GZZ9	UBA5	0.103507	0.169595	-0.0752384	0.371261	0.710443	0.980556
Q9UIJ7	AK3	-0.102	0.0616592	0.0714473	-0.369305	0.711901	0.980556
Q9Y496	KIF3A	-0.100799	0.193506	0.274951	-0.368983	0.712141	0.980556
Q13045	FLII	0.103156	0.24165	0.130795	0.366677	0.713861	0.980556
O95886	DLGAP3	-0.0999322	0.239198	0.347642	-0.365518	0.714725	0.980556
O94919	ENDOD1	-0.0997145	0.11601	0.118636	-0.365279	0.714903	0.980556
Q15048	LRRC14	0.101186	0.222066	0.0565335	0.364396	0.715563	0.980556
Q9Y6G9	DYNC1LI1	0.0988739	0.223727	0.115829	0.36212	0.717263	0.980556
O14548	COX7A2L	-0.100209	0.193835	0.173333	-0.362001	0.717351	0.980556
O00483	NDUFA4	-0.100416	0.155638	0.158684	-0.361293	0.717881	0.980556
P13073	COX4I1	-0.0987211	0.157093	0.132458	-0.360593	0.718404	0.980556
Q8N9F0	NAT8L	-0.100306	0.215519	0.30114	-0.360064	0.718799	0.980556
P30049	ATP5F1D	-0.0991799	0.144193	0.12556	-0.359747	0.719037	0.980556
Q9BWQ8	FAIM2	-0.100052	0.102267	0.118564	-0.359344	0.719338	0.980556
O00499	BIN1	0.0979296	0.155526	-0.0204558	0.358664	0.719847	0.980556
Q9NY65	TUBA8	-0.0980589	0.182597	0.283003	-0.358462	0.719998	0.980556
Q01518	CAP1	-0.0996623	0.124475	0.139048	-0.357725	0.72055	0.980556
Q9NVA1	UQCC1	-0.0974027	0.122874	0.157603	-0.355654	0.7221	0.980556
P04792	HSPB1	0.0975598	0.124467	-0.188162	0.354534	0.722939	0.980556
Q9Y678	COPG1	0.0980761	0.21408	0.019352	0.354445	0.723006	0.980556
P26196	DDX6	-0.0987672	0.13406	0.197546	-0.354369	0.723063	0.980556
Q7RTN6	STRADA	-0.0971941	0.15008	0.247763	-0.353407	0.723784	0.980556
P30519	HMOX2	0.0965486	0.0479894	-0.101637	0.353257	0.723896	0.980556
O95970	LGI1	-0.0962506	0.122786	0.141791	-0.35157	0.725161	0.980556
Q9NRW1	RAB6B	0.0974712	0.0306114	-0.186077	0.351563	0.725166	0.980556
O43676	NDUFB3	-0.0985094	0.102332	0.159577	-0.351318	0.725351	0.980556
P31150	GDI1	-0.0963904	0.138515	0.116976	-0.349748	0.726528	0.980556
P04406	GAPDH	-0.0956883	0.121293	0.132046	-0.349436	0.726763	0.980556
P35232	PHB	-0.0963365	0.176671	0.163538	-0.348472	0.727486	0.980556
Q92777	SYN2	0.0949808	0.231689	0.147127	0.347946	0.727881	0.980556
O00571	DDX3X	0.0954015	0.221649	0.0506384	0.347679	0.728081	0.980556
Q13190	STX5	-0.0938008	0.191537	0.190744	-0.342297	0.732128	0.981147
P14406	COX7A2	-0.0938915	0.158359	0.132923	-0.341549	0.732691	0.981147
Q7RTP6	MICAL3	0.0939917	0.244882	0.0980008	0.338727	0.734816	0.981147
Q92900	UPF1	-0.0929788	0.179442	0.281111	-0.338551	0.734948	0.981147
P56134	ATP5MF	-0.0945484	0.0811313	0.13991	-0.338342	0.735106	0.981147
Q9H330	TMEM245	0.0938638	-0.0256316	-0.101948	0.336658	0.736375	0.981147
Q14694	USP10	0.0938582	0.193799	0.0966248	0.336651	0.736381	0.981147
P11137	MAP2	-0.0920854	0.233468	0.225891	-0.336217	0.736708	0.981147
Q2M2I8	AAK1	0.0916668	0.211028	0.0725825	0.335803	0.73702	0.981147
P36507	MAP2K2	0.0927727	0.195552	0.0491521	0.335565	0.737199	0.981147
P02792	FTL	-0.091441	0.239476	0.164675	-0.334819	0.737762	0.981147
P08559	PDHA1	-0.09163	0.175911	0.155624	-0.334426	0.738059	0.981147
Q6GYQ0	RALGAPA1	0.0931361	0.243676	0.123867	0.334144	0.738271	0.981147
P49821	NDUFV1	0.0926888	0.204646	0.0580784	0.33316	0.739014	0.981147
P03891	MT-ND2	-0.0917748	0.115619	0.150907	-0.332771	0.739307	0.981147
P51659	HSD17B4	-0.0910323	0.180263	0.194547	-0.331901	0.739964	0.981147
Q9NQP4	PFDN4	0.0936548	0.115521	0.039834	0.331468	0.740291	0.981147
P49840	GSK3A	0.0913767	0.189961	0.0368696	0.331408	0.740337	0.981147
P53999	SUB1	-0.0921396	0.100655	0.129146	-0.331288	0.740428	0.981147
Q05193	DNM1	0.0900501	0.196545	0.0675296	0.329255	0.741963	0.981147
P78371	CCT2	0.089561	0.175178	0.0749084	0.325328	0.744933	0.981147
Q15119	PDK2	0.0893626	0.19324	0.0046048	0.324239	0.745757	0.981147
Q15907	RAB11B	0.0885508	0.0812078	-0.102938	0.323503	0.746315	0.981147
Q9Y5S2	CDC42BPB	-0.0895689	0.231882	0.332768	-0.323443	0.74636	0.981147
P00403	MT-CO2	-0.088554	0.167076	0.139408	-0.323279	0.746484	0.981147
P86790	CCZ1B	0.09018	0.237633	0.0334175	0.322909	0.746764	0.981147
Q86UW8	HAPLN4	0.0882849	0.109764	0.0445312	0.320403	0.748663	0.981147
P05166	PCCB	-0.0876933	0.194478	0.186793	-0.319634	0.749247	0.981147
Q9UQB3	CTNND2	-0.0878477	0.230872	0.278263	-0.318979	0.749742	0.981147
P68371	TUBB4B	0.0886714	0.196482	0.138084	0.318652	0.749991	0.981147
Q9GZT4	SRR	-0.0865828	0.0569916	0.0628419	-0.317039	0.751215	0.981147
P56181	NDUFV3	-0.0866481	0.0943191	0.153281	-0.316296	0.751778	0.981147
Q9Y265	RUVBL1	0.0858908	0.189115	0.125963	0.314674	0.753009	0.981147
Q13884	SNTB1	-0.0867712	0.190031	0.16579	-0.314094	0.75345	0.981147
Q9UDW1	UQCR10	-0.0856996	-0.0400697	0.0317873	-0.311915	0.755106	0.981147
P61160	ACTR2	0.086791	0.173115	0.0348511	0.311174	0.755669	0.981147
O43920	NDUFS5	0.0849032	0.119818	-0.0178541	0.311017	0.755788	0.981147
P36969	GPX4	0.085481	0.258993	0.0258717	0.309936	0.75661	0.981147
Q8N122	RPTOR	0.0859735	0.20538	0.163467	0.308185	0.757942	0.981147
Q4KMP7	TBC1D10B	0.0857898	0.280269	0.177354	0.307245	0.758657	0.981147
P60880	SNAP25	-0.0842683	0.134468	0.14941	-0.307186	0.758702	0.981147
O00330	PDHX	-0.0846511	0.193361	0.198151	-0.306797	0.758998	0.981147
Q9Y3E7	CHMP3	-0.0859405	0.0573538	0.0723509	-0.306663	0.7591	0.981147
O94910	ADGRL1	0.0838674	0.201351	0.130587	0.306262	0.759406	0.981147
Q6PCB7	SLC27A1	0.0841515	0.201179	0.0731613	0.305673	0.759854	0.981147
P49411	TUFM	-0.0837871	0.2328	0.290187	-0.305413	0.760052	0.981147
P09972	ALDOC	0.0830856	0.173275	-0.032024	0.30441	0.760816	0.981147
P23297	S100A1	0.083954	0.114566	-0.0176353	0.303959	0.76116	0.981147
O95168	NDUFB4	0.0834499	0.153833	0.0184196	0.303477	0.761526	0.981147
Q00325	SLC25A3	-0.0837188	0.176655	0.212028	-0.3033	0.761662	0.981147
O75334	PPFIA2	-0.0833473	0.240502	0.360481	-0.301839	0.762775	0.981147
Q9Y4I1	MYO5A	0.082521	0.233697	0.153925	0.3015	0.763033	0.981147
O00562	PITPNM1	0.0837358	0.268896	0.190661	0.301426	0.76309	0.981147
O14827	RASGRF2	-0.082898	0.209926	0.281634	-0.301147	0.763303	0.981147
Q15878	CACNA1E	-0.0828519	0.195036	0.277535	-0.299297	0.764714	0.981147
Q5SW79	CEP170	0.0815964	0.277511	0.17667	0.298883	0.76503	0.981147
P22234	PAICS	0.0830342	0.221722	0.0892195	0.29838	0.765414	0.981147
A7KAX9	ARHGAP32	0.0816197	0.219861	0.106872	0.298345	0.76544	0.981147
P06396	GSN	-0.0815547	0.143941	0.0683852	-0.298232	0.765526	0.981147
P30626	SRI	-0.0817674	0.209514	0.132672	-0.297624	0.76599	0.981147
P48444	ARCN1	0.0810835	0.184523	-0.00715045	0.297063	0.766419	0.981147
Q8N3P4	VPS8	0.0810972	0.235479	0.183547	0.296062	0.767183	0.981147
Q5JU85	IQSEC2	-0.0807706	0.253003	0.339905	-0.2949	0.76807	0.981147
P24539	ATP5PB	-0.0802165	0.165213	0.1609	-0.29309	0.769454	0.981147
P54652	HSPA2	-0.0801881	0.176475	0.0535984	-0.292704	0.769748	0.981147
O14908	GIPC1	-0.0819412	0.165965	0.162745	-0.290538	0.771405	0.981147
Q9Y2J2	EPB41L3	-0.0793052	0.16819	0.169374	-0.290293	0.771593	0.981147
P62888	RPL30	-0.0800705	0.102814	0.0868085	-0.290167	0.771689	0.981147
P03886	MT-ND1	-0.0790214	0.0965513	0.13929	-0.28849	0.772972	0.981147
Q9UPW8	UNC13A	-0.078647	0.217047	0.335892	-0.287607	0.773648	0.981147
P63010	AP2B1	0.0788878	0.218146	0.133563	0.28671	0.774334	0.981147
Q8TB36	GDAP1	0.0802813	0.148514	0.0836423	0.286323	0.774631	0.981147
Q5TBA9	FRY	0.0791954	0.281375	0.200753	0.285622	0.775168	0.981147
O75915	ARL6IP5	-0.0776942	0.00259983	0.0148818	-0.284567	0.775977	0.981147
Q9Y4F1	FARP1	-0.0776735	0.20486	0.306466	-0.283233	0.776998	0.981147
P17152	TMEM11	-0.0774892	0.151979	0.175376	-0.283221	0.777008	0.981147
P55072	VCP	-0.0771347	0.187904	0.191139	-0.282358	0.777669	0.981147
O75534	CSDE1	-0.0775194	0.193386	0.225331	-0.28199	0.777952	0.981147
O95182	NDUFA7	-0.0762231	0.136881	0.155004	-0.279201	0.780091	0.981147
A8MVW0	FAM171A2	-0.0776052	0.177696	0.238212	-0.278194	0.780864	0.981147
Q00013	MPP1	-0.0769897	0.221536	0.182934	-0.27736	0.781504	0.981147
Q7L2E3	DHX30	0.0769455	0.242718	0.149119	0.277337	0.781522	0.981147
Q5TF21	SOGA3	0.0756107	0.185546	0.0465891	0.277024	0.781762	0.981147
Q5JPH6	EARS2	0.0752723	0.188457	0.0861547	0.274844	0.783437	0.981147
Q9Y305	ACOT9	0.0759258	0.202661	0.0825045	0.274766	0.783496	0.981147
Q15477	SKIV2L	-0.0751039	0.237128	0.33037	-0.272457	0.785271	0.981147
A6NGB9	WIPF3	0.0742558	0.260225	0.102775	0.272012	0.785613	0.981147
Q9H8M1	COQ10B	0.0740573	0.228633	0.0693929	0.271103	0.786312	0.981147
Q9HAR2	ADGRL3	-0.0741323	0.198435	0.223279	-0.270896	0.786471	0.981147
O14976	GAK	0.0745963	0.226694	0.157418	0.270843	0.786512	0.981147
Q6DN14	MCTP1	-0.0757383	0.267284	0.31731	-0.270757	0.786578	0.981147
P40227	CCT6A	0.0746724	0.16835	0.082732	0.27075	0.786584	0.981147
P09417	QDPR	-0.0747525	0.2408	0.129247	-0.270384	0.786865	0.981147
P28482	MAPK1	0.0742871	0.137467	0.0118645	0.270166	0.787032	0.981147
Q9NXC2	GFOD1	0.0743339	0.183642	0.0558275	0.269166	0.787802	0.981147
Q15149	PLEC	0.0729507	0.235594	0.0691991	0.267278	0.789255	0.981147
Q9NZR1	TMOD2	-0.0730772	0.101797	0.094999	-0.266694	0.789705	0.981147
P46459	NSF	-0.0723302	0.221987	0.259831	-0.264892	0.791093	0.981147
Q8NFX7	STXBP6	-0.072178	0.225489	0.201745	-0.264304	0.791546	0.981147
O75962	TRIO	0.0721813	0.223225	0.181991	0.263526	0.792145	0.981147
O14578	CIT	-0.0717491	0.205261	0.307322	-0.262332	0.793066	0.981147
Q5T0F9	CC2D1B	0.0721703	0.238914	-0.0248454	0.26161	0.793622	0.981147
O75964	ATP5MG	0.0725242	0.104523	-0.00510365	0.260917	0.794157	0.981147
Q9NVJ2	ARL8B	0.0718003	0.169149	0.0443187	0.26079	0.794255	0.981147
Q8N1B4	VPS52	0.0715433	0.168763	0.0470318	0.260644	0.794367	0.981147
P17600	SYN1	0.0709268	0.18007	0.108456	0.2598	0.795018	0.981147
P35611	ADD1	0.070078	0.195375	0.0670751	0.256366	0.797669	0.981147
P35579	MYH9	-0.0702501	0.230535	0.299226	-0.255425	0.798395	0.981147
P23677	ITPKA	-0.06953	0.26284	0.312378	-0.253905	0.799569	0.981147
P56385	ATP5ME	-0.0702544	0.0612401	0.0445024	-0.25339	0.799967	0.981147
P49368	CCT3	0.0696423	0.205889	0.112272	0.253274	0.800057	0.981147
O95299	NDUFA10	0.0691986	0.19516	0.042721	0.251965	0.801068	0.981147
Q7Z4S6	KIF21A	-0.0683816	0.219513	0.271276	-0.249995	0.802591	0.981147
Q9UHD8	SEPTIN9	-0.0681455	0.246391	0.225182	-0.249014	0.80335	0.981147
Q14344	GNA13	0.0678218	0.131346	-0.026752	0.246315	0.805438	0.981147
Q9P2U7	SLC17A7	-0.0672188	0.171652	0.190808	-0.246241	0.805496	0.981147
P14136	GFAP	-0.0663126	0.163145	0.03577	-0.242802	0.808159	0.981147
Q12959	DLG1	-0.0663393	0.222386	0.167596	-0.242326	0.808528	0.981147
Q8WXG6	MADD	0.0658299	0.175503	0.113424	0.240792	0.809717	0.981147
P63167	DYNLL1	0.0665294	0.22178	0.0572149	0.239586	0.810652	0.981147
Q8IUS5	EPHX4	-0.066404	0.166621	0.249111	-0.239074	0.811048	0.981147
P11274	BCR	-0.0663631	0.272439	0.312269	-0.238954	0.811142	0.981147
P63027	VAMP2	0.0661158	0.133909	-0.0047577	0.237209	0.812495	0.981147
Q8IWQ3	BRSK2	-0.0655469	0.23144	0.256441	-0.236933	0.812709	0.981147
Q9P1U1	ACTR3B	-0.0656741	0.130296	0.179046	-0.235698	0.813667	0.981147
P50148	GNAQ	0.0654329	0.128787	0.00630237	0.234344	0.814718	0.981147
Q5FWE3	PRRT3	-0.0645655	0.257838	0.237763	-0.23393	0.81504	0.981147
P61266	STX1B	0.0649368	0.0945021	-0.0389695	0.233739	0.815188	0.981147
Q92614	MYO18A	-0.0639251	0.226313	0.261871	-0.232747	0.815958	0.981147
P55084	HADHB	-0.0637256	0.170329	0.0973186	-0.231903	0.816614	0.981147
P11182	DBT	0.063241	0.211374	0.10703	0.231552	0.816886	0.981147
O75146	HIP1R	0.0629039	0.183406	0.0571462	0.230306	0.817854	0.981147
Q6H8Q1	ABLIM2	-0.0628288	0.213302	0.175569	-0.229505	0.818477	0.981147
Q9BZC7	ABCA2	-0.0632143	0.178682	0.2042	-0.228332	0.819388	0.981147
Q9H3P7	ACBD3	0.0633271	0.201532	0.0770087	0.228282	0.819428	0.981147
Q9BY44	EIF2A	-0.0619578	0.130695	0.138962	-0.226107	0.821118	0.981147
P04844	RPN2	0.062851	0.135352	-0.0136682	0.224654	0.822249	0.981147
Q9BY11	PACSIN1	0.0622775	0.0622689	0.00519955	0.223432	0.8232	0.981147
P06733	ENO1	-0.0608483	0.0979299	0.0451135	-0.222791	0.823698	0.981147
Q9P2P5	HECW2	-0.0613604	0.174462	0.262694	-0.22202	0.824299	0.981147
O14936	CASK	0.0610758	0.220749	0.159609	0.220205	0.825712	0.981147
O60890	OPHN1	0.0613119	0.161738	0.0452473	0.219918	0.825935	0.981147
Q14166	TTLL12	0.0612712	0.215771	0.1368	0.218902	0.826726	0.981147
P07814	EPRS1	-0.0599712	0.162103	0.136808	-0.218852	0.826766	0.981147
Q9UBS5	GABBR1	0.0596017	0.14983	0.119136	0.217918	0.827493	0.981147
Q9UEY8	ADD3	0.0602691	0.145251	0.00910857	0.2176	0.827741	0.981147
P05496	ATP5MC1	-0.060646	0.160269	0.0844945	-0.216429	0.828654	0.981147
Q96JH7	VCPIP1	0.0596956	0.230198	0.204247	0.215614	0.829289	0.981147
Q76NI1	KNDC1	-0.0593963	0.161228	0.253275	-0.215043	0.829734	0.981147
Q96JJ3	ELMO2	-0.0594624	0.218966	0.233859	-0.214821	0.829907	0.981147
Q6X4W1	NSMF	-0.0592014	0.208205	0.246538	-0.214172	0.830413	0.981147
P09669	COX6C	0.0585005	0.17295	-0.00821219	0.213639	0.830829	0.981147
Q6NTF9	RHBDD2	-0.0589667	0.268175	0.300416	-0.211515	0.832486	0.981147
P36404	ARL2	0.0581709	0.192446	-0.0019949	0.211436	0.832548	0.981147
Q9Y2I8	WDR37	-0.0585251	0.233293	0.262324	-0.210312	0.833424	0.981147
Q13724	MOGS	0.0583536	0.227938	0.115468	0.208836	0.834576	0.981147
P27338	MAOB	0.0571004	0.184603	0.0603932	0.208705	0.834679	0.981147
Q6P1M0	SLC27A4	-0.0573654	0.238435	0.219823	-0.208668	0.834708	0.981147
P07203	GPX1	-0.0574363	0.138339	0.0926429	-0.208223	0.835055	0.981147
Q9H2G2	SLK	0.0573422	0.143128	0.047724	0.208132	0.835126	0.981147
Q13057	COASY	-0.056861	0.16023	0.192213	-0.207404	0.835694	0.981147
Q9UH03	SEPTIN3	0.0573779	0.210344	0.0877227	0.20729	0.835784	0.981147
Q9NSD9	FARSB	0.0564399	0.259185	0.120863	0.206726	0.836224	0.981147
Q03001	DST	0.0567955	0.204216	0.0735437	0.205891	0.836876	0.981147
P68366	TUBA4A	0.0575658	0.211115	0.162778	0.205783	0.836961	0.981147
Q330K2	NDUFAF6	0.0571663	0.150875	0.0907231	0.205603	0.837101	0.981147
Q96FZ7	CHMP6	0.0570016	0.141612	0.0136265	0.204741	0.837774	0.981147
P61421	ATP6V0D1	0.055721	0.215856	0.119105	0.203829	0.838487	0.981147
O95298	NDUFC2	0.0571922	0.175599	0.0639888	0.203341	0.838869	0.981147
O94967	WDR47	0.0556397	0.239203	0.173394	0.203238	0.838949	0.981147
Q96AG4	LRRC59	-0.0549534	0.224749	0.189288	-0.200732	0.840908	0.981147
Q9NYB9	ABI2	0.0556258	0.199086	0.178273	0.198858	0.842374	0.981147
Q9P035	HACD3	-0.0543354	0.134662	0.104718	-0.198842	0.842386	0.981147
Q14195	DPYSL3	0.0548757	0.179939	0.0469939	0.198037	0.843016	0.981147
Q9BVC4	MLST8	-0.05504	0.191713	0.180149	-0.197996	0.843049	0.981147
Q13554	CAMK2B	-0.0538126	0.210499	0.226555	-0.197149	0.843712	0.981147
Q96JE9	MAP6	0.0546419	0.261043	0.21685	0.195485	0.845014	0.981147
P28472	GABRB3	-0.0541988	0.148426	0.211218	-0.195296	0.845161	0.981147
P51114	FXR1	0.054137	0.142654	0.0359513	0.194143	0.846064	0.981147
Q99683	MAP3K5	0.0537879	0.210447	0.169375	0.19408	0.846113	0.981147
P04843	RPN1	-0.0529327	0.154547	0.12482	-0.19391	0.846246	0.981147
Q15185	PTGES3	0.0529031	0.149093	0.0391675	0.193633	0.846463	0.981147
Q9Y6V0	PCLO	-0.0529251	0.221667	0.294184	-0.19345	0.846607	0.981147
Q9NZ01	TECR	0.0536643	0.17585	0.13232	0.193423	0.846628	0.981147
P25705	ATP5F1A	-0.0525995	0.155051	0.127675	-0.192442	0.847396	0.981147
Q9H3Q1	CDC42EP4	0.0537213	0.117814	-0.0544035	0.192113	0.847654	0.981147
Q9UQ16	DNM3	0.0522586	0.196692	0.0935321	0.19086	0.848635	0.981147
Q5TH69	ARFGEF3	0.0518341	0.230114	0.178526	0.189534	0.849675	0.981147
P08237	PFKM	0.051592	0.206626	0.138974	0.188357	0.850597	0.981147
O75368	SH3BGRL	-0.0511309	0.0893876	0.0537063	-0.186599	0.851975	0.981147
Q7KZF4	SND1	0.052102	0.249736	0.102871	0.186436	0.852103	0.981147
P04350	TUBB4A	-0.0508113	0.221703	0.269343	-0.186133	0.852341	0.981147
Q8N2K0	ABHD12	-0.0513714	0.217123	0.226246	-0.185214	0.853061	0.981147
Q8TEA8	DTD1	-0.0502742	0.163295	0.148771	-0.183813	0.85416	0.981147
Q9H019	MTFR1L	-0.0502388	0.241305	0.223375	-0.1835	0.854406	0.981147
Q13332	PTPRS	-0.0499146	0.0778782	0.0492987	-0.182864	0.854905	0.981147
Q13885	TUBB2A	-0.0502384	0.151757	0.201111	-0.182391	0.855276	0.981147
Q6Y1H2	HACD2	0.0519172	0.179585	0.0933003	0.182183	0.855439	0.981147
Q15700	DLG2	-0.0493501	0.231301	0.184509	-0.1807	0.856603	0.981147
Q07960	ARHGAP1	0.0494081	0.0938918	0.0015694	0.180105	0.85707	0.981147
Q9H1Z4	WDR13	0.0489957	0.174864	0.122923	0.179372	0.857646	0.981147
Q9BQE5	APOL2	0.0490425	0.0949479	-0.0281551	0.179222	0.857763	0.981147
Q9UJC5	SH3BGRL2	-0.0488241	0.127244	0.0760775	-0.177923	0.858783	0.981147
P23634	ATP2B4	-0.0488008	0.169138	0.186133	-0.177751	0.858918	0.981147
P30085	CMPK1	0.0484464	0.174741	-0.0659951	0.176751	0.859705	0.981147
P40926	MDH2	0.0483342	0.165612	0.0347175	0.17664	0.859791	0.981147
Q9Y4W6	AFG3L2	-0.0482624	0.205521	0.157544	-0.176346	0.860022	0.981147
P19404	NDUFV2	0.0481333	0.169524	0.0930815	0.175767	0.860477	0.981147
Q9H1K0	RBSN	0.0479697	0.177279	0.0743614	0.175723	0.860512	0.981147
Q00535	CDK5	-0.0473638	0.196582	0.2061	-0.173224	0.862475	0.981147
O75380	NDUFS6	0.0482925	0.107196	0.0254593	0.172517	0.863031	0.981147
Q96JB5	CDK5RAP3	-0.0479532	0.175068	0.0674736	-0.172063	0.863388	0.981147
P10606	COX5B	-0.0475472	0.162003	0.0627529	-0.171976	0.863457	0.981147
Q8NFP9	NBEA	-0.0470932	0.180561	0.203775	-0.171922	0.863499	0.981147
P24752	ACAT1	-0.0470216	0.182781	0.138511	-0.17188	0.863532	0.981147
P35612	ADD2	0.0469859	0.12456	0.0265017	0.171715	0.863661	0.981147
O14910	LIN7A	0.0468136	0.183524	0.0929377	0.168376	0.866287	0.981147
Q8N5S9	CAMKK1	-0.0458615	0.210157	0.225312	-0.167855	0.866698	0.981147
O76024	WFS1	0.0456034	0.270315	0.0720091	0.165573	0.868493	0.981147
O95202	LETM1	-0.0458419	0.0735876	0.102271	-0.16539	0.868637	0.981147
P61221	ABCE1	-0.0452099	0.183031	0.192874	-0.165181	0.868802	0.981147
Q9Y2L5	TRAPPC8	0.0454956	0.154047	0.11863	0.163831	0.869865	0.981147
Q5H9R7	PPP6R3	0.0455902	0.208942	0.170006	0.163798	0.86989	0.981147
P30084	ECHS1	0.045016	0.191789	-0.00737603	0.163667	0.869994	0.981147
P0DMV9	HSPA1B	-0.0446303	0.164323	0.0795954	-0.163501	0.870124	0.981147
Q8NF91	SYNE1	-0.0447442	0.245614	0.278826	-0.163487	0.870135	0.981147
P19338	NCL	-0.0446256	0.0753138	0.0647066	-0.163167	0.870387	0.981147
Q9H0R4	HDHD2	0.0450538	0.131484	0.0291381	0.162814	0.870665	0.981147
P40855	PEX19	-0.045072	0.21699	0.271409	-0.162359	0.871023	0.981147
Q9NVE7	PANK4	-0.044358	0.229556	0.242612	-0.161237	0.871907	0.981147
Q9UBP0	SPAST	0.0446856	0.180925	0.0617837	0.161045	0.872058	0.981147
O43295	SRGAP3	0.0436244	0.207894	0.124356	0.159467	0.873301	0.981147
Q9Y490	TLN1	0.0436866	0.147012	0.0354304	0.15803	0.874433	0.981147
P04083	ANXA1	-0.0430291	0.113678	0.0295396	-0.156988	0.875255	0.981147
Q9HA65	TBC1D17	-0.0430189	0.286704	0.296226	-0.156789	0.875411	0.981147
Q8IXI2	RHOT1	0.0422673	0.255148	0.140229	0.154855	0.876936	0.981147
Q9P2B4	CTTNBP2NL	0.0424619	0.254796	0.225828	0.154715	0.877047	0.981147
Q9NZQ3	NCKIPSD	-0.0427156	0.226416	0.27816	-0.154127	0.87751	0.981147
P84085	ARF5	0.0424823	0.0512049	-0.0812345	0.151797	0.879347	0.981147
O14775	GNB5	-0.0412607	0.165209	0.117273	-0.15111	0.879889	0.981147
Q96GC9	VMP1	0.0427001	0.211976	0.119178	0.150912	0.880046	0.981147
Q14738	PPP2R5D	-0.0415184	0.216379	0.19711	-0.150468	0.880396	0.981147
O95670	ATP6V1G2	-0.0416488	0.241965	0.2192	-0.149964	0.880794	0.981147
Q9Y426	C2CD2	-0.040793	0.186033	0.150852	-0.14901	0.881546	0.981147
P51970	NDUFA8	-0.0413302	0.0993465	0.0817823	-0.148492	0.881955	0.981147
P25098	GRK2	0.0408473	0.219392	0.150723	0.146765	0.883318	0.981147
Q8TBX8	PIP4K2C	0.0399703	0.216764	0.140242	0.14644	0.883574	0.981147
P19086	GNAZ	-0.040522	0.205147	0.197253	-0.146233	0.883737	0.981147
O95140	MFN2	-0.039885	0.232106	0.254624	-0.144635	0.884999	0.981147
Q9Y6D6	ARFGEF1	0.0397287	0.228498	0.204153	0.144431	0.88516	0.981147
P43304	GPD2	-0.0399644	0.182378	0.171083	-0.144399	0.885186	0.981147
Q9H269	VPS16	0.04061	0.248369	0.186168	0.143778	0.885676	0.981147
P13804	ETFA	0.0391086	0.185136	0.0367011	0.142953	0.886327	0.981147
O96011	PEX11B	0.0396166	0.11828	0.0712619	0.1427	0.886527	0.981147
P36915	GNL1	0.038742	0.151738	0.0789866	0.141839	0.887208	0.981147
Q15042	RAB3GAP1	0.0390555	0.278571	0.243611	0.140083	0.888595	0.981147
Q14155	ARHGEF7	-0.0386861	0.185756	0.228636	-0.13942	0.889118	0.981147
P23246	SFPQ	0.0379037	0.18497	0.0407318	0.138714	0.889676	0.981147
P00367	GLUD1	-0.037844	0.225666	0.115038	-0.138557	0.889801	0.981147
Q9NPQ8	RIC8A	-0.0383917	0.17662	0.160383	-0.138318	0.889989	0.981147
Q66K74	MAP1S	0.0378949	0.27657	0.175679	0.138165	0.89011	0.981147
P11177	PDHB	-0.03801	0.192551	0.117914	-0.137185	0.890884	0.981147
Q9Y6D5	ARFGEF2	-0.0374078	0.225507	0.242351	-0.13694	0.891078	0.981147
Q9NR31	SAR1A	0.0376104	0.175715	0.065543	0.135541	0.892184	0.981147
O60331	PIP5K1C	-0.0374202	0.220092	0.252787	-0.134779	0.892787	0.981147
Q5HYI7	MTX3	0.0374564	0.207445	0.106575	0.134663	0.892879	0.981147
P10515	DLAT	0.0367647	0.203295	0.0836306	0.134626	0.892908	0.981147
P10644	PRKAR1A	-0.037791	0.158067	0.0586177	-0.134459	0.89304	0.981147
Q15049	MLC1	-0.0374598	0.233942	0.168983	-0.13376	0.893593	0.981147
O14949	UQCRQ	0.0372803	0.0566786	-0.00281012	0.133655	0.893676	0.981147
Q9BRX8	PRXL2A	0.0363243	0.0259671	-0.0588108	0.131494	0.895385	0.982351
Q9NS86	LANCL2	0.0358605	0.253338	0.211544	0.130452	0.896209	0.982583
Q6P1N0	CC2D1A	-0.0349732	0.16068	0.166328	-0.126743	0.899144	0.985127
O75382	TRIM3	-0.0348109	0.234694	0.244316	-0.125353	0.900245	0.985348
Q9HD33	MRPL47	0.034885	0.158732	0.188192	0.124937	0.900573	0.985348
P48643	CCT5	0.0326978	0.160959	0.0835509	0.119793	0.904647	0.987465
Q8NFV4	ABHD11	-0.0331361	0.190156	0.158358	-0.119589	0.904809	0.987465
Q86SK9	SCD5	-0.0327629	0.140787	0.113598	-0.119191	0.905124	0.987465
O43491	EPB41L2	0.0324828	0.155831	-0.0243692	0.118505	0.905668	0.987465
Q9UN86	G3BP2	0.0331012	0.113773	0.0287775	0.118294	0.905835	0.987465
Q96PU8	QKI	-0.0317207	0.155709	0.0881083	-0.114152	0.909117	0.987465
P84077	ARF1	0.0314456	0.0916023	-0.0204718	0.113978	0.909256	0.987465
Q8N5K1	CISD2	-0.031348	0.0491602	0.0364478	-0.113954	0.909274	0.987465
Q9Y3F4	STRAP	0.0313017	0.197744	0.101719	0.113379	0.909731	0.987465
P23284	PPIB	0.0312823	0.174047	0.0631143	0.112259	0.910618	0.987465
P11021	HSPA5	0.0304591	0.0942581	-0.0282369	0.111544	0.911185	0.987465
P68104	EEF1A1	-0.0303473	0.225274	0.155138	-0.111009	0.911609	0.987465
Q9NRY4	ARHGAP35	-0.0300967	0.19866	0.254602	-0.110042	0.912376	0.987465
P53680	AP2S1	0.030133	0.140772	0.0632024	0.10889	0.91329	0.987465
Q13526	PIN1	0.0302901	0.144298	0.0631292	0.108069	0.913941	0.987465
Q2M3C7	SPHKAP	0.0298242	0.23394	0.211024	0.107992	0.914002	0.987465
Q6UXD5	SEZ6L2	0.0293799	0.177347	0.0938233	0.107316	0.914538	0.987465
Q9Y3I0	RTCB	0.0291967	0.195351	0.0874726	0.10691	0.91486	0.987465
Q86Y39	NDUFA11	-0.0292768	0.137302	0.0959261	-0.106717	0.915014	0.987465
O43237	DYNC1LI2	-0.0297052	0.179318	0.124523	-0.105532	0.915954	0.987465
Q9NTX5	ECHDC1	0.0291084	0.167103	0.0952515	0.104842	0.916501	0.987465
O15144	ARPC2	-0.0286677	0.0671714	0.0336909	-0.104777	0.916553	0.987465
O75306	NDUFS2	0.0285092	0.197014	0.123206	0.104109	0.917083	0.987465
Q9NX14	NDUFB11	0.0289341	0.172352	0.0867352	0.103305	0.917721	0.987465
P36543	ATP6V1E1	-0.0281584	0.16084	0.145416	-0.103001	0.917962	0.987465
Q9P0K1	ADAM22	-0.0281306	0.202504	0.13281	-0.100725	0.919769	0.987465
P17252	PRKCA	0.0277899	0.215722	0.137878	0.0999207	0.920407	0.987465
Q14416	GRM2	0.0270441	0.212062	0.229673	0.0987015	0.921375	0.987465
Q4G176	ACSF3	-0.0270159	0.231594	0.140627	-0.0986454	0.92142	0.987465
P19367	HK1	-0.0268948	0.251233	0.18935	-0.0983319	0.921669	0.987465
P54920	NAPA	-0.0268505	0.151807	0.0585069	-0.0983177	0.92168	0.987465
Q9Y3E5	PTRH2	0.0272223	0.216563	0.0994714	0.0976521	0.922209	0.987465
P22830	FECH	-0.0256548	0.157041	0.183132	-0.0930397	0.925872	0.990726
P50990	CCT8	0.0252969	0.19539	0.140981	0.0920067	0.926693	0.990943
P15104	GLUL	0.0245259	0.071463	-0.0259138	0.0898263	0.928425	0.991927
Q66K14	TBC1D9B	-0.0248061	0.21192	0.252307	-0.0892924	0.92885	0.991927
Q02952	AKAP12	-0.0236896	0.217381	0.142583	-0.0867613	0.930861	0.993414
P31930	UQCRC1	-0.023292	0.243786	0.129412	-0.085191	0.93211	0.993802
P14649	MYL6B	0.0231797	0.17079	0.187526	0.0847458	0.932464	0.993802
P29120	PCSK1	-0.0229284	0.160838	0.152964	-0.0835189	0.933439	0.994181
Q96Q05	TRAPPC9	0.0229538	0.278808	0.232915	0.0823052	0.934404	0.994337
Q08462	ADCY2	-0.0224798	0.228326	0.282644	-0.0817747	0.934826	0.994337
Q13409	DYNC1I2	0.0218206	0.165262	0.0761433	0.0793317	0.936769	0.994699
Q9UPR0	PLCL2	0.0219378	0.276794	0.182117	0.0791218	0.936936	0.994699
Q9Y285	FARSA	0.021689	0.219758	0.107755	0.0790083	0.937026	0.994699
Q8N111	CEND1	-0.0212781	0.216232	0.130828	-0.0778451	0.937951	0.995022
P62873	GNB1	-0.020775	0.169887	0.0625548	-0.0756835	0.939671	0.996188
Q9Y6F6	IRAG1	0.0197665	0.07482	-0.051371	0.0724039	0.942281	0.997525
O15294	OGT	-0.0199561	0.250681	0.293283	-0.0721672	0.942469	0.997525
Q13555	CAMK2G	0.0199477	0.224619	0.176052	0.0717534	0.942798	0.997525
Q9Y6M9	NDUFB9	-0.0196029	0.0993319	0.0824317	-0.070852	0.943516	0.997596
Q9Y4D1	DAAM1	0.0190154	0.245662	0.173025	0.0696035	0.944509	0.997596
Q71U36	TUBA1A	-0.0187503	0.148736	0.159926	-0.0683843	0.94548	0.997596
Q9UL26	RAB22A	-0.0189538	0.201333	0.140234	-0.0682072	0.945621	0.997596
P40763	STAT3	0.018491	0.240078	0.176699	0.0676357	0.946076	0.997596
P18507	GABRG2	-0.0188513	0.191645	0.201168	-0.0667294	0.946797	0.997596
Q9Y639	NPTN	0.0180258	0.0831254	-0.00650699	0.0660345	0.94735	0.997596
Q8WZA2	RAPGEF4	0.017746	0.259616	0.267374	0.0642413	0.948778	0.997596
Q93050	ATP6V0A1	0.0175344	0.217027	0.157003	0.0642397	0.948779	0.997596
Q9UPT6	MAPK8IP3	-0.017555	0.170252	0.140695	-0.0631693	0.949632	0.997596
P50995	ANXA11	-0.0167101	0.230061	0.0832813	-0.0612117	0.951191	0.997596
Q53FP2	TMEM35A	0.0154272	0.0749704	-0.019182	0.0562797	0.955119	0.997596
P05198	EIF2S1	-0.015557	0.14198	0.0309136	-0.0561021	0.955261	0.997596
Q92930	RAB8B	-0.0155533	0.146234	0.0350205	-0.0556854	0.955592	0.997596
O75390	CS	0.0149704	0.219887	0.0725166	0.0545777	0.956475	0.997596
O00217	NDUFS8	-0.0152394	0.11585	0.0770508	-0.0545281	0.956514	0.997596
Q12906	ILF3	0.0148443	0.111745	0.0349488	0.0534221	0.957396	0.997596
P47756	CAPZB	0.0143984	0.220253	0.126807	0.0523177	0.958276	0.997596
Q16623	STX1A	0.0141221	0.113487	0.0668989	0.0515923	0.958854	0.997596
P09622	DLD	-0.0140225	0.189387	0.0836316	-0.0504832	0.959737	0.997596
Q92574	TSC1	0.0140491	0.257518	0.275116	0.0504331	0.959777	0.997596
Q99798	ACO2	-0.0137943	0.164195	0.0806691	-0.0504323	0.959778	0.997596
Q9Y2X7	GIT1	0.0136815	0.210905	0.1819	0.0498404	0.96025	0.997596
Q13636	RAB31	0.0133865	0.123242	0.075053	0.047121	0.962417	0.997596
Q9Y4P8	WIPI2	-0.0128217	0.229912	0.180649	-0.0467455	0.962716	0.997596
Q01082	SPTBN1	-0.0126597	0.223975	0.147171	-0.0462817	0.963086	0.997596
P78406	RAE1	0.0128165	0.193928	0.0321461	0.0460779	0.963248	0.997596
Q9HAD4	WDR41	-0.0125507	0.145848	0.111313	-0.0459213	0.963373	0.997596
Q92736	RYR2	-0.0122509	0.241015	0.217942	-0.0448601	0.964219	0.997596
Q99584	S100A13	-0.0126705	0.181331	0.0511829	-0.0448342	0.96424	0.997596
Q969Z3	MTARC2	0.0123597	0.161978	0.104741	0.0444437	0.964551	0.997596
P57088	TMEM33	0.0122807	0.191312	0.161595	0.0443675	0.964612	0.997596
Q9Y6C9	MTCH2	-0.0122625	0.169648	0.126674	-0.0443161	0.964652	0.997596
O14561	NDUFAB1	-0.0121439	0.138601	0.0174967	-0.0433485	0.965424	0.997596
P07339	CTSD	-0.0115117	0.243754	0.146744	-0.0418486	0.966619	0.997596
P04899	GNAI2	-0.0110737	0.15853	0.0482501	-0.040543	0.96766	0.997596
P04075	ALDOA	0.0110347	0.23399	0.135091	0.0403903	0.967782	0.997596
Q8WUY1	THEM6	0.0108145	0.0894246	0.0193771	0.0390857	0.968822	0.997596
Q9Y5M8	SRPRB	-0.0108341	0.173615	0.121075	-0.0386696	0.969154	0.997596
Q13363	CTBP1	-0.0102478	0.0601289	0.0426714	-0.0374018	0.970165	0.997596
Q9H1K1	ISCU	0.0100715	0.163818	0.113456	0.0357697	0.971466	0.997596
O43815	STRN	0.00978999	0.207658	0.135206	0.0350879	0.97201	0.997596
Q6DN90	IQSEC1	0.00955447	0.24593	0.260365	0.0349426	0.972126	0.997596
Q8N6H7	ARFGAP2	-0.00965554	0.0824316	0.0325115	-0.0348051	0.972235	0.997596
P43897	TSFM	-0.00948714	0.231351	0.238029	-0.0342168	0.972704	0.997596
Q7Z7E8	UBE2Q1	0.00920646	0.226898	0.197866	0.033409	0.973349	0.997596
Q9BQG1	SYT3	0.00929124	0.154209	0.101582	0.033346	0.973399	0.997596
Q5T5U3	ARHGAP21	0.00900041	0.197057	0.205759	0.0324114	0.974144	0.997596
P41743	PRKCI	0.00864629	0.219057	0.172938	0.0315722	0.974813	0.997596
Q9H6U6	BCAS3	0.00877436	0.218974	0.20674	0.0314925	0.974877	0.997596
P08574	CYC1	0.00840697	0.14687	0.0855481	0.0300793	0.976004	0.997596
P22626	HNRNPA2B1	-0.00795617	0.112909	-0.000396857	-0.0290646	0.976813	0.997596
P62070	RRAS2	0.00776963	0.113822	0.107555	0.0283516	0.977382	0.997596
Q13510	ASAH1	-0.00757789	0.269278	0.14648	-0.0275867	0.977992	0.997596
Q92552	MRPS27	0.00755041	0.23753	0.227702	0.0274804	0.978077	0.997596
Q9NT62	ATG3	-0.00735856	0.172471	0.109109	-0.0269592	0.978492	0.997596
O43427	FIBP	-0.00695004	0.201572	0.146567	-0.0254205	0.97972	0.997596
Q9H845	ACAD9	-0.00700973	0.19181	0.167483	-0.0251542	0.979932	0.997596
Q86Y82	STX12	-0.00664136	0.0896575	0.0257013	-0.0240896	0.980781	0.997596
P26232	CTNNA2	0.00654234	0.187839	0.123204	0.0238475	0.980974	0.997596
O75122	CLASP2	-0.00650977	0.233347	0.185247	-0.0237897	0.98102	0.997596
P55087	AQP4	0.00598886	0.230903	0.0431334	0.0216277	0.982745	0.997596
O00305	CACNB4	-0.0055329	0.231905	0.164408	-0.0198163	0.98419	0.997596
Q13642	FHL1	-0.00547412	-0.0027848	0.101654	-0.0197277	0.984261	0.997596
Q9NZ56	FMN2	-0.00542448	0.235291	0.212043	-0.0192948	0.984606	0.997596
P27544	CERS1	-0.00489938	0.155058	0.0918327	-0.0176842	0.985891	0.997596
Q8N6D5	ANKRD29	0.00482866	0.0765899	-0.0422534	0.0176237	0.985939	0.997596
O15145	ARPC3	0.00463705	0.125175	0.0125135	0.0168874	0.986526	0.997596
Q9NZB2	FAM120A	-0.00443199	0.233947	0.225469	-0.0162192	0.98706	0.997596
Q9NP97	DYNLRB1	-0.00440842	0.0725651	0.030181	-0.0161456	0.987118	0.997596
Q02338	BDH1	0.00428903	0.206716	0.114415	0.0154283	0.987691	0.997596
P22061	PCMT1	-0.00423355	0.15435	0.0817079	-0.0151517	0.987911	0.997596
P07437	TUBB	-0.00389638	0.224748	0.255229	-0.0142149	0.988659	0.997596
Q9BPX5	ARPC5L	0.0037729	0.0685676	-0.0212486	0.01367	0.989093	0.997596
O75947	ATP5PD	-0.00363131	0.174846	0.0967697	-0.013147	0.989511	0.997596
Q9H7Z7	PTGES2	-0.00296083	0.0064576	-0.0238192	-0.0105199	0.991606	0.999081
O95169	NDUFB8	0.00203198	0.124911	0.107804	0.0074344	0.994068	0.999322
Q14832	GRM3	-0.00191356	0.210299	0.197108	-0.00692722	0.994473	0.999322
Q96BY7	ATG2B	0.00176075	0.240368	0.269223	0.00643659	0.994864	0.999322
Q96DA2	RAB39B	0.00178161	0.136771	0.0669964	0.00642523	0.994873	0.999322
O75251	NDUFS7	0.00123996	0.176199	0.106645	0.00442305	0.996471	0.999322
Q96JN2	CCDC136	-0.00112997	0.181017	0.147577	-0.00405498	0.996765	0.999322
Q9H078	CLPB	0.000848552	0.0922968	0.0189158	0.00310412	0.997523	0.999322
Q92558	WASF1	0.000679695	0.231513	0.184032	0.00240825	0.998078	0.999322
O43813	LANCL1	-0.000638173	0.215155	0.0766634	-0.00233722	0.998135	0.999322
O75145	PPFIA3	0.000458853	0.237806	0.249547	0.00167239	0.998666	0.999322
O75781	PALM	0.000251553	0.144513	0.0440944	0.000910413	0.999274	0.999322
Q96BM9	ARL8A	-0.000237815	0.127047	0.0276847	-0.00085037	0.999322	0.999322
