# Supplementary material for: Targeting the Post-Synaptic Proteome in Alzheimer Disease with Psychosis
Source: Research Square preprint supplement (doi:10.21203/rs.3.rs-1514870/v1), 2022-04-04
Supplement: Supplementary file 9 [file f10c4be1e73cb0937864a21a.xlsx]

## Sheet: Legend
S7A
Column Header	Definition
sig_id	Unique identifier for the signature
perturbagen_name	The internal (CMap-designated) name of a perturbagen. By convention, for genetic perturbations CMap uses the HUGO gene symbol.
cell_iname	Curated name for the cell line
pert_id	A unique identifier for a perturbagen that refers to the perturbagen in general, not to any particular batch or sample.
pert_idose	The concatenation of perturbagen dose and perturbagen dose unit to create a string variable containing the dose information. A standardized dose is used for perturbagens (e.g., the less common dose of 10.04 is rounded to 10, enabling grouping of signatures by a common dose).
pert_itime	The concatenation of perturbagen time and perturbagen time unit to create a string variable containing the length of time that a perturbagen was applied to the cells. A standardized time for a perturbagen treatment is used (e.g., if data is made by treating cells with a perturbagen for 5.5 hours, it is rounded to the more common treatment time of 6 hours).
S7B
Column Header	Definition
Drug
Cell Line	Curated name for the cell line
Number of studies	Number of studies that met the inclusion criteria for the drug
Significant Drug Gene Effects	Number of genes significantly altered by the drug
Overlap	Overlap of significant drug gene effects with altered PSD proteins
Same	Direction of test drug gene effects matches that of PSD protein alterations in AD+P
Inverse	Direction of test drug gene effects is opposite that of PSD protein alterations in AD+P
Score	Jaccard Signed Index
Indication	Indications for the drug

## Sheet: Table S7A
sig_id	perturbagen_name	cell_iname	pert_id	pert_idose	pert_itime
ASG002_U251MG_24H:H13	fostamatinib	U251MG	BRD-K20285085	10 uM	24 h
ASG002_YH13_24H:H13	fostamatinib	YH13	BRD-K20285085	10 uM	24 h
ASG002_GI1_24H:H13	fostamatinib	GI1	BRD-K20285085	10 uM	24 h
MOAR011_GI1_24H:F20	fostamatinib	GI1	BRD-K20285085	3.33 uM	24 h
MOAR011_GI1_24H:F21	fostamatinib	GI1	BRD-K20285085	1.11 uM	24 h
MOAR011_GI1_24H:F19	fostamatinib	GI1	BRD-K20285085	10 uM	24 h
MOAR012_GI1_24H:I08	maraviroc	GI1	BRD-A04352665	3.33 uM	24 h
MOAR012_GI1_24H:I07	maraviroc	GI1	BRD-A04352665	10 uM	24 h
MOAR012_GI1_24H:I09	maraviroc	GI1	BRD-A04352665	1.11 uM	24 h
MOAR011_GI1_24H:M11	odanacatib	GI1	BRD-K22822991	3.33 uM	24 h
MOAR011_GI1_24H:M10	odanacatib	GI1	BRD-K22822991	10 uM	24 h
MOAR011_GI1_24H:M12	odanacatib	GI1	BRD-K22822991	1.11 uM	24 h

## Sheet: Table S7B
Drug	Cell Line	Number of studies	Significant Drug Gene Effects	Overlap	Same	Inverse	Score	Indication
Fostamatinib	Gl1, U251MG, YH13	6	1763	48	9	39	-0.0056	Chronic Immune Thrombocytopenia
Odanacatib	GI1	3	815	28	13	15	-0.0011	Osteoporosis
Maraviroc	GI1	3	1246	48	10	38	-0.0071	Ccr5-tropic HIV-1 Infection
