# Supplementary material for: Targeting the Post-Synaptic Proteome in Alzheimer Disease with Psychosis
Source: Research Square preprint supplement (doi:10.21203/rs.3.rs-1514870/v1), 2022-04-04
Supplement: Supplementary file 10 [file 3aa6b3e44e61cef6397ddc7e.xlsx]

## Sheet: AD+P vs Control 
Annotation Cluster 1	Enrichment Score: 14.279350181308121
Category	Term	Count	%	PValue		List Total	Pop Hits	Pop Total	Fold Enrichment	Bonferroni	Benjamini	FDR	Uniprot Accession
KEGG_PATHWAY	hsa03010:Ribosome	58	9.94854	9.44113e-25		302	60	876	2.80397	2.17146e-22	2.17146e-22	2.17146e-22	Q96A35, P23396, P62917, P62081, P62280, P18124, P39019, P62750, P62277, P39023, P30050, P83731, P62913, P62753, Q07020, P46782, P46781, P62244, P84098, P61353, P62241, P61313, P05386, P46777, P05387, P60866, P27635, P46779, P05388, P49207, P62249, P25398, P32969, P18621, Q02878, P50914, P63220, P62899, P40429, P61247, P62857, P62851, P08865, P08708, P26373, P62906, P62829, P35268, P18077, P62266,…
GOTERM_MF_DIRECT	GO:0003735~structural constituent of ribosome	65	11.1492	7.04813e-21		548	73	1524	2.47625	4.91255e-18	4.91255e-18	4.91255e-18	Q96A35, P23396, P62917, P62081, P62280, P18124, P39019, P62750, P62277, Q02978, P39023, P30050, P83731, P62913, P62753, Q07020, P46782, P46781, P62244, P84098, P61353, P62241, P05141, P61313, P05386, P46777, P05387, P60866, P27635, P46779, P05388, P49207, P62249, P25398, P32969, Q9BV35, P82909, P12235, P18621, Q02878, P50914, P63220, P62899, P40429, P61247, P82663, P62857, P08865, Q9H936, P08708,…
UP_KEYWORDS	Ribosomal protein	62	10.6346	9.12553e-21		583	68	1604	2.50853	3.24869e-18	3.24869e-18	3.15743e-18	Q96A35, P23396, P62917, P62081, P62280, P18124, P39019, P62750, P62277, P39023, P30050, P83731, P62913, P62753, Q07020, P46782, P46781, P62244, P84098, P61353, P62241, P61313, P05386, P46777, P05387, P60866, P27635, P46779, P05388, P49207, P62249, P25398, P32969, P82909, P18621, Q02878, P50914, P63220, P62899, P40429, P61247, P82663, P62857, P62851, P08865, P08708, Q8N5N7, P26373, P62906, P62829,…
GOTERM_BP_DIRECT	GO:0019083~viral transcription	55	9.43396	1.07427e-20		550	58	1536	2.64828	2.64378e-17	2.64378e-17	2.63949e-17	P23396, P62917, P62081, P62280, P18124, P39019, P62750, P62277, P39023, P30050, P83731, P62913, P62753, Q07020, P46782, P46781, P62244, P84098, P61353, P62241, P61313, P05386, P46777, P05387, P60866, P27635, P46779, P05388, P49207, P62249, P25398, P32969, P18621, Q02878, P50914, P63220, P62899, P40429, P61247, P62857, P62851, P08865, P08708, P26373, P62906, P62829, P35268, P18077, P62266, P15880,…
GOTERM_BP_DIRECT	GO:0006614~SRP-dependent cotranslational protein targeting to membrane	55	9.43396	8.43093e-20		550	59	1536	2.60339	2.07485e-16	6.91617e-17	6.90493e-17	P23396, P62917, P62081, P62280, P18124, P39019, P62750, P62277, P39023, P30050, P83731, P62913, P62753, Q07020, P46782, P46781, P62244, P84098, P61353, P62241, P61313, P05386, P46777, P05387, P60866, P27635, P46779, P05388, P49207, P62249, P25398, P32969, P18621, Q02878, P50914, P63220, P62899, P40429, P61247, P62857, P62851, P08865, P08708, P26373, P62906, P62829, P35268, P18077, P62266, P15880,…
GOTERM_BP_DIRECT	GO:0006364~rRNA processing	55	9.43396	8.43093e-20		550	59	1536	2.60339	2.07485e-16	6.91617e-17	6.90493e-17	P23396, P62917, P62081, P62280, P18124, P39019, P62750, P62277, P39023, P30050, P83731, P62913, P62753, Q07020, P46782, P46781, P62244, P84098, P61353, P62241, P61313, P05386, P46777, P05387, P60866, P27635, P46779, P05388, P49207, P62249, P25398, P32969, P18621, Q02878, P50914, P63220, P62899, P40429, P61247, P62857, P62851, P08865, P08708, P26373, P62906, P62829, P35268, P18077, P62266, P15880,…
GOTERM_BP_DIRECT	GO:0006412~translation	66	11.3208	8.28988e-19		550	78	1536	2.36308	2.04014e-15	5.10035e-16	5.09206e-16	Q96A35, P23396, P62917, P62081, P62280, P18124, P39019, P19525, P62750, P62277, Q02978, P39023, P30050, P83731, P62913, P62753, Q07020, P46782, P46781, P62244, P84098, P61353, P62241, P05141, P61313, P05386, P46777, P05387, P60866, P27635, P46779, P05388, P49207, P62249, P25398, P32969, Q9BV35, P82909, P12235, P18621, Q02878, P50914, P63220, P62899, P40429, P61247, P62857, P62851, P08865, Q9Y2Z4,…
GOTERM_BP_DIRECT	GO:0000184~nuclear-transcribed mRNA catabolic process, nonsense-mediated decay	55	9.43396	3.24654e-18		550	61	1536	2.51803	7.98974e-15	1.59795e-15	1.59535e-15	P23396, P62917, P62081, P62280, P18124, P39019, P62750, P62277, P39023, P30050, P83731, P62913, P62753, Q07020, P46782, P46781, P62244, P84098, P61353, P62241, P61313, P05386, P46777, P05387, P60866, P27635, P46779, P05388, P49207, P62249, P25398, P32969, P18621, Q02878, P50914, P63220, P62899, P40429, P61247, P62857, P62851, P08865, P08708, P26373, P62906, P62829, P35268, P18077, P62266, P15880,…
UP_KEYWORDS	Ribonucleoprotein	66	11.3208	1.00951e-16		583	81	1604	2.24179	3.95239e-14	1.79693e-14	1.74646e-14	Q96A35, Q14764, P23396, P62917, P62081, P62280, P18124, P39019, P62750, P62277, P39023, P30050, P62316, P83731, P62913, P62753, Q00839, Q07020, P46782, P46781, P62244, P84098, P61353, P62241, P61313, P05386, P46777, P05387, P60866, P27635, P46779, P05388, P49207, P62249, P25398, P32969, P82909, P18621, Q02878, P50914, P63220, P62899, P40429, P61247, P82663, P62857, P62851, P08865, P08708, Q8N5N7,…
GOTERM_CC_DIRECT	GO:0005840~ribosome	57	9.77702	1.0242e-16		576	66	1590	2.384	5.70655e-14	5.26439e-14	5.22343e-14	Q96A35, P23396, P62917, P62081, P62280, P18124, P39019, P19525, P62750, P62277, P39023, P83731, P62913, P62753, Q07020, P46781, P62244, P84098, P61353, P62241, P61313, P05386, P46777, P05387, P60866, P27635, P46779, P05388, P49207, P62249, P32969, Q02878, P50914, P63220, P62899, P40429, P61247, P82663, P62857, P62851, P08708, Q8N5N7, P26373, P62906, P62829, P35268, P18077, P62266, P15880, Q9P0M9,…
GOTERM_BP_DIRECT	GO:0006413~translational initiation	56	9.60549	7.86797e-14		550	70	1536	2.23418	1.93717e-10	3.22718e-11	3.22194e-11	P23396, P62917, P62081, P62280, P18124, P39019, P62750, P62277, P39023, P30050, P83731, P62913, P62753, Q07020, P46782, P46781, P62244, P84098, P61353, P62241, P61313, P05386, P46777, P05387, P60866, P27635, P46779, P05388, P49207, P62249, P25398, P32969, P18621, Q02878, P50914, P63220, P62899, P40429, P61247, P62857, P62851, P08865, Q6PKG0, P08708, P26373, P62906, P62829, P35268, P18077, P62266,…
GOTERM_CC_DIRECT	GO:0022625~cytosolic large ribosomal subunit	31	5.31732	7.42029e-12		576	32	1590	2.67415	3.81403e-09	1.90701e-09	1.89217e-09	P32969, P62917, P18124, P18621, P62750, Q02878, P50914, P39023, P30050, P62899, P40429, P83731, P62913, Q07020, P26373, P62906, P62829, P35268, P18077, P84098, P61353, Q02543, P61313, P05386, P46777, P05387, P27635, P46779, P05388, P62424, P49207
GOTERM_CC_DIRECT	GO:0022627~cytosolic small ribosomal subunit	24	4.11664	1.75886e-07		576	27	1590	2.4537	9.04013e-05	3.01351e-05	2.99006e-05	P25398, P23396, P08708, P46782, P46781, P62081, P62280, P39019, P62244, P62266, P62277, P15880, P62263, P63220, P62241, P62701, P61247, P62857, P62851, P62269, P60866, P08865, P62753, P62249
GOTERM_MF_DIRECT	GO:0003723~RNA binding	42	7.20412	0.000349156		548	74	1524	1.57842	0.216045	0.121681	0.121681	P23396, P32969, P62917, Q9Y224, P62081, P18124, Q02878, P50914, P39023, P62899, P61247, P83731, P62857, P62913, P62851, Q00839, Q07020, Q15700, P06748, P46782, P26373, P62906, P14625, P35268, O43865, P62244, P84098, P15880, Q02543, P62263, P62701, P09543, P61313, P09001, Q15477, P46777, P62269, P60866, P46779, P62424, P62249, P49207
GOTERM_MF_DIRECT	GO:0044822~poly(A) RNA binding	103	17.6672	0.00363295		548	232	1524	1.23468	0.920879	0.633042	0.633042	P05204, P23396, P62917, P62081, P30086, P10599, P18124, P15531, P62750, Q02978, P83731, P62913, Q92614, P07355, P62753, Q00839, Q14697, P49411, Q8NF91, P46782, P46781, P62244, P84098, P62241, P61313, P46777, P60866, P27635, P10809, P46779, P62249, P50395, P25398, P62937, P30101, P18621, Q86UE4, P20810, P63220, P62899, P40429, P22314, Q9Y2Z4, Q16891, Q8NCA5, P08708, P26373, P62829, P18077, Q02790,…
GOTERM_CC_DIRECT	GO:0005730~nucleolus	42	7.20412	0.0201797		576	87	1590	1.33261	0.999972	0.797874	0.791665	Q15019, P23396, P32969, P62917, P62081, P62280, P18124, Q99490, P39019, P42224, P62750, Q86UE4, P62277, P39023, P30050, P35240, Q9NTK5, P40429, P61247, P62913, P62851, P62753, Q07020, P06748, P62906, P62829, P46781, P11137, Q16181, P62266, P11142, P84098, P15880, P62263, Q92522, Q99816, Q16566, Q66K74, P46777, Q15233, P62424, P49207
Annotation Cluster 2	Enrichment Score: 2.8040132852405923
Category	Term	Count	%	PValue		List Total	Pop Hits	Pop Total	Fold Enrichment	Bonferroni	Benjamini	FDR	Uniprot Accession
UP_KEYWORDS	Disulfide bond	69	11.8353	5.2311e-05		583	129	1604	1.47162	0.0184508	0.00380001	0.00369327	P23471, Q12860, O14594, P30041, P30086, P20916, P10599, P30044, Q9NX63, P05090, Q6UWR7, P21926, P13591, P42263, P42262, P02768, P02689, P09497, P45974, P61626, Q969P0, Q9GZV7, P51674, P06748, Q13449, O75899, Q9BRQ6, P22748, P42658, Q02246, P47985, P05067, Q14982, P27797, P05026, P78324, P04216, P51649, P30101, Q99784, P60033, P01857, Q92752, Q16653, P21589, Q8N126, P78357, Q08495, O15394, Q9Y6R1,…
UP_KEYWORDS	Glycoprotein	92	15.7804	0.000248287		583	189	1604	1.33925	0.0846063	0.0126271	0.0122724	P23471, Q13510, Q12860, Q969L2, O14594, P11169, P20916, P16389, P05090, Q6UWR7, P21926, P13591, P07196, P42263, P42262, P63000, P02768, P07197, Q8N387, Q8N145, Q9UI40, Q969P0, Q16352, P08247, O15294, P09936, P51674, Q14697, Q9UHG3, Q13449, O75899, Q08554, P22748, P42658, P23515, Q02246, Q8IWA5, Q16566, P02511, P05067, Q14982, Q9NPD7, P27797, P46976, P05026, P78324, Q8N766, P04216, P28066, P62937,…
UP_SEQ_FEATURE	disulfide bond	53	9.09091	0.00091546		583	101	1603	1.44284	0.76453	0.179494	0.179494	O95831, Q12860, O14594, P30041, P20916, P10599, P30044, P05090, P13591, P02768, P02689, P09497, P61626, Q969P0, Q9GZV7, Q13449, P22748, P42658, Q02246, P47985, P05067, Q14982, P27797, P05026, P78324, P04216, P51649, P30101, Q99784, P60033, P01857, Q92752, Q16653, Q8N126, P78357, O15394, Q96PB7, O94772, P32119, O94856, Q7Z3B1, P14625, P10586, Q9P121, Q06830, P14867, Q9Y2B0, O75077, Q9NQ79, P24821,…
UP_SEQ_FEATURE	signal peptide	64	10.9777	0.00160095		583	129	1603	1.36413	0.920336	0.210792	0.210792	O95831, P23471, Q13510, Q12860, O14594, P20916, P05090, Q6UWR7, P13591, P42263, P42262, P02768, Q8N387, Q8N145, Q9UI40, P61626, Q969P0, Q9GZV7, Q14697, Q9UHG3, Q13449, O75899, Q08554, P22748, P23515, Q02246, P05067, Q14982, Q9NPD7, P27797, P04179, P78324, Q8N766, P04216, P30101, P07093, Q99784, P01857, Q92752, Q16653, P21589, P55290, Q8N126, Q6UXV4, P78357, O15394, Q96PB7, O94772, O94856, Q7Z3B1,…
UP_SEQ_FEATURE	glycosylation site:N-linked (GlcNAc...)	68	11.6638	0.00799754		583	146	1603	1.28062	0.999997	0.842408	0.842408	P23471, Q13510, Q12860, Q969L2, O14594, P11169, P20916, P16389, P05090, Q6UWR7, P21926, P13591, P42263, P42262, Q8N387, Q8N145, Q9UI40, Q969P0, P08247, P51674, Q14697, Q9UHG3, Q13449, O75899, Q08554, P42658, P23515, Q02246, Q8IWA5, P05067, Q14982, P27797, P05026, P78324, Q8N766, P04216, Q8N608, P07093, Q99784, P01857, Q92752, Q16653, P21589, P55290, Q8N126, P78357, O15394, Q9Y6R1, Q96PB7, O94772,…
UP_KEYWORDS	Signal	72	12.3499	0.0984917		583	173	1604	1.14504	1	1	0.974648	P23471, Q13510, Q12860, O14594, P20916, O75382, P05090, Q6UWR7, P13591, P42263, P42262, P02768, Q8N387, Q8N145, P78352, P61626, Q969P0, Q9GZV7, Q14697, Q9Y4P3, Q9UHG3, Q13449, O75899, Q08554, Q86UR5, P22748, P23515, Q02246, P54829, P46379, P05067, Q14982, Q9NPD7, P27797, P78324, Q8N766, P04216, P30101, Q14C86, Q00059, P07093, Q99784, P60033, P55809, Q92752, Q16653, Q5XKP0, P21589, P55290, Q8N126,…
Annotation Cluster 3	Enrichment Score: 1.898212206966194
Category	Term	Count	%	PValue		List Total	Pop Hits	Pop Total	Fold Enrichment	Bonferroni	Benjamini	FDR	Uniprot Accession
UP_SEQ_FEATURE	propeptide:Removed in mature form	28	4.80274	7.59102e-07		583	35	1603	2.19966	0.0011979	0.00119938	0.00119938	Q12860, P04216, P10114, O95057, P63000, Q15382, P21589, P60953, P55290, Q9UL25, O94772, Q13449, Q9NP72, Q7Z3B1, Q9P121, Q96HU8, P28072, P11233, Q9H492, P22748, P84095, P23515, Q02246, P62745, O14773, Q14982, Q9NPD7, P04156
UP_KEYWORDS	GPI-anchor	16	2.74443	5.3371e-05		583	18	1604	2.44559	0.0188212	0.00380001	0.00369327	Q12860, O94772, P04216, Q13449, Q7Z3B1, Q9P121, P22748, P23515, Q6UWR7, P13591, Q02246, P21589, Q14982, Q9NPD7, P55290, P04156
UP_KEYWORDS	Cell adhesion	32	5.48885	8.85226e-05		583	49	1604	1.79676	0.031024	0.00525234	0.0051048	Q12860, O14594, P20916, P35579, P35580, P13591, P21926, Q9UQB3, P55196, Q92752, Q16653, P55290, Q8N126, P78357, O15394, O94856, Q13449, Q7Z3B1, P10586, Q9P121, Q02156, P35222, Q08554, O60716, O75077, P23515, Q02246, P62745, P24821, P05067, Q14982, P05026
GOTERM_CC_DIRECT	GO:0031225~anchored component of membrane	15	2.5729	0.000119927		576	17	1590	2.43566	0.0597845	0.0154106	0.0152907	Q12860, O94772, Q13449, Q7Z3B1, Q9P121, P22748, P23515, Q6UWR7, P13591, Q02246, P21589, Q14982, Q9NPD7, P55290, P04156
GOTERM_BP_DIRECT	GO:0007155~cell adhesion	34	5.8319	0.000266984		550	56	1536	1.69558	0.481666	0.0938639	0.0937113	P78324, Q12860, P04216, O14594, P20916, P35580, P62330, P13591, P21926, Q9UQB3, P63000, P55196, Q92752, Q16653, P08865, P55290, P78357, Q9GZV7, O15394, Q13449, P35609, P10586, Q9P121, Q02156, P35222, O60716, O75077, P23515, Q02246, P62745, P24821, P05067, Q14982, P05026
UP_SEQ_FEATURE	domain:Ig-like C2-type 1	13	2.22985	0.000667808		583	15	1603	2.38296	0.651745	0.179494	0.179494	O15394, Q12860, O94856, Q13449, Q7Z3B1, P10586, Q9P121, P20916, P13591, Q02246, Q14982, Q969P0, Q8N126
UP_SEQ_FEATURE	domain:Ig-like C2-type 2	13	2.22985	0.000667808		583	15	1603	2.38296	0.651745	0.179494	0.179494	O15394, Q12860, O94856, Q13449, Q7Z3B1, P10586, Q9P121, P20916, P13591, Q02246, Q14982, Q969P0, Q8N126
UP_SEQ_FEATURE	domain:Ig-like C2-type 3	12	2.05832	0.00150349		583	14	1603	2.35678	0.90706	0.210792	0.210792	O15394, Q12860, Q02246, O94856, P13591, Q13449, Q7Z3B1, P10586, Q9P121, P20916, Q14982, Q969P0
INTERPRO	IPR007110:Immunoglobulin-like domain	19	3.25901	0.00379413		571	29	1574	1.80603	0.986576	1	1	P78324, Q9GZV7, O15394, Q12860, P04216, O94856, Q13449, Q7Z3B1, O14594, P10586, Q9P121, P20916, P13591, Q02246, P01857, Q16653, Q14982, Q969P0, Q8N126
UP_KEYWORDS	Immunoglobulin domain	19	3.25901	0.00389463		583	29	1604	1.80257	0.750724	0.131527	0.127833	P78324, Q9GZV7, O15394, Q12860, P04216, O94856, Q13449, Q7Z3B1, O14594, P10586, Q9P121, P20916, P13591, Q02246, P01857, Q16653, Q14982, Q969P0, Q8N126
INTERPRO	IPR003599:Immunoglobulin subtype	17	2.91595	0.00712065		571	26	1574	1.80237	0.999698	1	1	P78324, Q9GZV7, O15394, Q12860, O94856, Q13449, Q7Z3B1, O14594, P10586, Q9P121, P20916, P13591, Q02246, Q16653, Q14982, Q969P0, Q8N126
INTERPRO	IPR013783:Immunoglobulin-like fold	23	3.94511	0.00731937		571	39	1574	1.62567	0.999759	1	1	P78324, Q9GZV7, P23471, O15394, Q12860, P04216, O94856, Q13449, Q7Z3B1, O14594, P10586, Q9P121, P20916, O75382, P13591, Q02246, P01857, Q92752, P24821, Q16653, Q14982, Q969P0, Q8N126
INTERPRO	IPR013098:Immunoglobulin I-set	11	1.88679	0.00771945		571	14	1574	2.16587	0.999847	1	1	O15394, Q12860, Q02246, O94856, P13591, Q13449, Q7Z3B1, P10586, Q9P121, Q14982, Q8N126
SMART	SM00409:IG	17	2.91595	0.00961497		299	26	797	1.74286	0.855185	0.961497	0.961497	P78324, Q9GZV7, O15394, Q12860, O94856, Q13449, Q7Z3B1, O14594, P10586, Q9P121, P20916, P13591, Q02246, Q16653, Q14982, Q969P0, Q8N126
KEGG_PATHWAY	hsa04514:Cell adhesion molecules (CAMs)	11	1.88679	0.0102069		302	15	876	2.12715	0.905547	0.782531	0.782531	P78357, O15394, Q12860, Q02246, O94856, P13591, Q7Z3B1, P10586, P20916, O75508, Q8N126
INTERPRO	IPR003598:Immunoglobulin subtype 2	12	2.05832	0.0154175		571	17	1574	1.94581	1	1	1	O15394, Q12860, Q02246, O94856, P13591, Q13449, Q7Z3B1, P10586, Q9P121, P20916, Q14982, Q8N126
SMART	SM00408:IGc2	12	2.05832	0.0194503		299	17	797	1.88157	0.980325	1	1	O15394, Q12860, Q02246, O94856, P13591, Q13449, Q7Z3B1, P10586, Q9P121, P20916, Q14982, Q8N126
UP_SEQ_FEATURE	domain:Ig-like C2-type 4	7	1.20069	0.0302281		583	8	1603	2.40587	1	1	1	O15394, Q12860, Q02246, O94856, P13591, P20916, Q969P0
UP_SEQ_FEATURE	domain:Fibronectin type-III 1	8	1.37221	0.0316125		583	10	1603	2.19966	1	1	1	O15394, Q12860, Q02246, O94856, P13591, P10586, Q92752, P24821
UP_SEQ_FEATURE	domain:Fibronectin type-III 2	8	1.37221	0.0316125		583	10	1603	2.19966	1	1	1	O15394, Q12860, Q02246, O94856, P13591, P10586, Q92752, P24821
SMART	SM00060:FN3	9	1.54374	0.037181		299	12	797	1.99916	0.999488	1	1	P23471, O15394, Q12860, Q02246, O94856, P13591, P10586, Q92752, P24821
UP_SEQ_FEATURE	domain:Fibronectin type-III 3	6	1.02916	0.121272		583	8	1603	2.06218	1	1	1	Q12860, Q02246, O94856, P10586, Q92752, P24821
UP_SEQ_FEATURE	domain:Fibronectin type-III 4	6	1.02916	0.121272		583	8	1603	2.06218	1	1	1	Q12860, Q02246, O94856, P10586, Q92752, P24821
UP_SEQ_FEATURE	domain:Ig-like C2-type 5	5	0.857633	0.131707		583	6	1603	2.29131	1	1	1	O15394, Q12860, Q02246, O94856, P13591
INTERPRO	IPR003961:Fibronectin, type III	9	1.54374	0.132929		571	15	1574	1.65394	1	1	1	P23471, O15394, Q12860, Q02246, O94856, P13591, P10586, Q92752, P24821
INTERPRO	IPR013106:Immunoglobulin V-set	7	1.20069	0.239426		571	12	1574	1.608	1	1	1	P78324, Q9GZV7, O15394, P04216, O14594, Q16653, Q969P0
UP_SEQ_FEATURE	domain:Ig-like V-type	7	1.20069	0.318946		583	13	1603	1.48054	1	1	1	P78324, Q9GZV7, P04216, O14594, P20916, Q16653, Q8N126
UP_SEQ_FEATURE	domain:Fibronectin type-III 5	4	0.686106	0.37935		583	6	1603	1.83305	1	1	1	O94856, P10586, Q92752, P24821
SMART	SM00406:IGv	5	0.857633	0.451447		299	9	797	1.48086	1	1	1	P78324, Q9GZV7, O15394, P04216, Q16653
UP_SEQ_FEATURE	domain:Fibronectin type-III 6	3	0.51458	0.460218		583	4	1603	2.06218	1	1	1	P10586, Q92752, P24821
UP_SEQ_FEATURE	domain:Fibronectin type-III 7	3	0.51458	0.460218		583	4	1603	2.06218	1	1	1	P10586, Q92752, P24821
UP_SEQ_FEATURE	domain:Fibronectin type-III 8	3	0.51458	0.460218		583	4	1603	2.06218	1	1	1	P10586, Q92752, P24821
UP_SEQ_FEATURE	domain:Ig-like C2-type 6	3	0.51458	0.460218		583	4	1603	2.06218	1	1	1	Q12860, Q02246, O94856
Annotation Cluster 4	Enrichment Score: 1.8489551364433294
Category	Term	Count	%	PValue		List Total	Pop Hits	Pop Total	Fold Enrichment	Bonferroni	Benjamini	FDR	Uniprot Accession
GOTERM_CC_DIRECT	GO:0030054~cell junction	53	9.09091	0.0132959		576	112	1590	1.30627	0.998972	0.759341	0.753432	O15083, Q8IV01, Q07157, Q9ULJ8, O43759, P16389, P42263, P42262, P55196, Q8N145, Q7Z6G8, P78352, Q8WXS5, P46821, P08247, O95886, Q15700, O75899, Q9UPW8, Q12959, Q9UQM7, Q86UR5, P17677, Q8TDC3, Q9P0K9, Q17R89, O14994, Q66K74, Q9NPD7, Q9P1A6, O14490, Q9GZY8, Q8NBU5, P11274, Q86YM7, Q99784, Q9Y6V0, Q13303, Q9NVA2, Q96PB7, O43581, Q9Y2J0, P43490, Q9NQX3, Q7L099, P14867, Q9Y4F1, P35222, Q7Z6L0, Q9UPA5,…
UP_KEYWORDS	Synapse	53	9.09091	0.0143144		583	112	1604	1.30195	0.9941	0.312355	0.30358	O15083, P05129, Q8IV01, Q96B97, Q9ULJ8, O43759, P16389, P42263, P42262, Q8N145, Q7Z6G8, P78352, Q8WXS5, P46821, P08247, O95886, Q15700, Q96SB3, Q12955, O75899, Q9UPW8, Q12959, Q9UQM7, Q86UR5, P17677, Q8TDC3, Q9P0K9, Q17R89, O14994, Q9NPD7, Q9P1A6, O14490, Q9GZY8, Q8NBU5, P11274, Q86YM7, Q99784, Q9Y6V0, Q13303, Q9NVA2, Q96PB7, O43581, Q9Y2J0, Q9NQX3, P14867, Q9Y4F1, Q7Z6L0, Q7L0J3, Q9UPA5, Q9C0D0,…
UP_KEYWORDS	Cell junction	73	12.5214	0.0149158		583	162	1604	1.23978	0.995252	0.312355	0.30358	O15083, P05129, Q8IV01, Q9H329, Q96B97, P12814, Q07157, Q9ULJ8, O43759, P16389, P42263, P42262, P55196, Q8N145, Q7Z6G8, P78352, Q8WXS5, P46821, O75508, P08247, Q92974, O95886, Q15700, Q96SB3, Q5SQI0, Q12955, O75899, Q9UPW8, Q5T442, Q12959, Q08554, Q9UQM7, Q86UR5, P17677, Q8TDC3, Q9P0K9, Q17R89, O14994, Q9NPD7, Q9P1A6, O14490, Q9Y5S2, Q9GZY8, Q8NBU5, Q674X7, Q9P0L0, P11274, Q86UE4, Q86YM7, Q99784,…
Annotation Cluster 5	Enrichment Score: 1.7689340546929235
Category	Term	Count	%	PValue		List Total	Pop Hits	Pop Total	Fold Enrichment	Bonferroni	Benjamini	FDR	Uniprot Accession
INTERPRO	IPR018039:Intermediate filament protein, conserved site	11	1.88679	0.00110889		571	12	1574	2.52685	0.71583	0.628743	0.628743	P35527, P35908, P08670, P07196, P07197, P13647, P13645, P02533, P04264, Q16352, P12036
INTERPRO	IPR001664:Intermediate filament protein	11	1.88679	0.00110889		571	12	1574	2.52685	0.71583	0.628743	0.628743	P35527, P35908, P08670, P07196, P07197, P13647, P13645, P02533, P04264, Q16352, P12036
UP_SEQ_FEATURE	region of interest:Head	11	1.88679	0.00113604		583	12	1603	2.52044	0.833843	0.179494	0.179494	P35527, P35908, P08670, P07196, P07197, P13647, P13645, P02533, P04264, Q16352, P12036
UP_SEQ_FEATURE	region of interest:Linker 1	11	1.88679	0.00113604		583	12	1603	2.52044	0.833843	0.179494	0.179494	P35527, P35908, P08670, P07196, P07197, P13647, P13645, P02533, P04264, Q16352, P12036
UP_SEQ_FEATURE	region of interest:Rod	11	1.88679	0.00113604		583	12	1603	2.52044	0.833843	0.179494	0.179494	P35527, P35908, P08670, P07196, P07197, P13647, P13645, P02533, P04264, Q16352, P12036
UP_SEQ_FEATURE	region of interest:Tail	11	1.88679	0.00113604		583	12	1603	2.52044	0.833843	0.179494	0.179494	P35527, P35908, P08670, P07196, P07197, P13647, P13645, P02533, P04264, Q16352, P12036
UP_SEQ_FEATURE	region of interest:Coil 1A	11	1.88679	0.00113604		583	12	1603	2.52044	0.833843	0.179494	0.179494	P35527, P35908, P08670, P07196, P07197, P13647, P13645, P02533, P04264, Q16352, P12036
UP_SEQ_FEATURE	region of interest:Coil 1B	11	1.88679	0.00113604		583	12	1603	2.52044	0.833843	0.179494	0.179494	P35527, P35908, P08670, P07196, P07197, P13647, P13645, P02533, P04264, Q16352, P12036
SMART	SM01391:SM01391	11	1.88679	0.00142818		299	12	797	2.44342	0.248617	0.285635	0.285635	P35527, P35908, P08670, P07196, P07197, P13647, P13645, P02533, P04264, Q16352, P12036
UP_SEQ_FEATURE	region of interest:Linker 12	10	1.71527	0.00265727		583	11	1603	2.49961	0.985026	0.322961	0.322961	P35527, P35908, P08670, P07196, P07197, P13647, P13645, P02533, P04264, P12036
UP_KEYWORDS	Intermediate filament	11	1.88679	0.00330977		583	13	1604	2.32801	0.692793	0.13092	0.127242	P35527, P35908, P08670, P07196, P07197, P13647, P13645, P02533, P04264, Q16352, P12036
UP_SEQ_FEATURE	region of interest:Coil 2	8	1.37221	0.00445166		583	8	1603	2.74957	0.999128	0.502402	0.502402	P35527, P35908, P08670, P13647, P13645, P02533, P04264, Q16352
UP_KEYWORDS	Keratin	6	1.02916	0.0260994		583	6	1604	2.75129	0.999918	0.497853	0.483869	P35527, P35908, P13647, P13645, P02533, P04264
GOTERM_CC_DIRECT	GO:0045095~keratin filament	5	0.857633	0.0604811		576	5	1590	2.76042	1	1	0.994152	P48729, P35908, P13647, P02533, P04264
INTERPRO	IPR002957:Keratin, type I	4	0.686106	0.138078		571	4	1574	2.75657	1	1	1	P35527, P07197, P13645, P02533
UP_SEQ_FEATURE	site:Stutter	4	0.686106	0.139023		583	4	1603	2.74957	1	1	1	P35908, P13647, P02533, P04264
GOTERM_CC_DIRECT	GO:0005882~intermediate filament	8	1.37221	0.148782		576	13	1590	1.69872	1	1	0.994152	P15531, P35527, P35908, P08670, Q9NZQ3, P13647, P13645, P02533
INTERPRO	IPR006821:Intermediate filament head, DNA-binding domain	4	0.686106	0.254025		571	5	1574	2.20525	1	1	1	P08670, P07196, P07197, Q16352
UP_SEQ_FEATURE	region of interest:Linker 2	4	0.686106	0.255529		583	5	1603	2.19966	1	1	1	P07196, P07197, Q16352, P12036
INTERPRO	IPR003054:Type II keratin	3	0.51458	0.298321		571	3	1574	2.75657	1	1	1	P35908, P13647, P04264
GOTERM_BP_DIRECT	GO:0008544~epidermis development	5	0.857633	0.309289		550	8	1536	1.74545	1	1	0.99878	P35527, P35908, Q9Y496, P13647, P02533
UP_KEYWORDS	Ichthyosis	4	0.686106	0.378886		583	6	1604	1.83419	1	1	0.974648	P35908, P13645, P04264, Q6P1M0
UP_KEYWORDS	Palmoplantar keratoderma	4	0.686106	0.378886		583	6	1604	1.83419	1	1	0.974648	P35527, P20810, P02533, P04264
GOTERM_MF_DIRECT	GO:0005200~structural constituent of cytoskeleton	16	2.74443	0.613081		548	43	1524	1.0348	1	1	1	P35527, P35908, Q13813, Q12955, Q9H329, P13647, Q9H254, P12036, P11277, Q9NY65, P08670, P07196, P07197, P04350, P02533, Q16352

## Sheet: AD-P vs Control
Annotation Cluster 1	Enrichment Score: 1.941677908178981
Category	Term	Count	%	PValue	List Total	Pop Hits	Pop Total	Fold Enrichment	Bonferroni	Benjamini	FDR	Uniprot Accession
UP_KEYWORDS	Isomerase	10	7.8125	0.000127184	128	27	1604	4.6412	0.0282126	0.0286164	0.0286164	P06744, P18669, P62937, P22033, Q15257, P26885, Q96JJ7, P30101, Q13572, Q02790
UP_KEYWORDS	Rotamase	4	3.125	0.0499642	128	11	1604	4.55682	0.99999	1	1	P62937, Q15257, P26885, Q02790
GOTERM_BP_DIRECT	GO:0000413~protein peptidyl-prolyl isomerization	4	3.125	0.0503378	123	11	1536	4.54102	1	1	1	P62937, Q15257, P26885, Q02790
GOTERM_MF_DIRECT	GO:0003755~peptidyl-prolyl cis-trans isomerase activity	4	3.125	0.0534938	125	11	1524	4.43345	1	1	1	P62937, Q15257, P26885, Q02790
Annotation Cluster 2	Enrichment Score: 1.6267172812429547
Category	Term	Count	%	PValue	List Total	Pop Hits	Pop Total	Fold Enrichment	Bonferroni	Benjamini	FDR	Uniprot Accession
UP_SEQ_FEATURE	short sequence motif:Prevents secretion from ER	7	5.46875	0.000227474	127	13	1603	6.79649	0.11157	0.118514	0.118514	Q15293, Q99784, P14625, Q9Y2B0, P26885, P30101, P27797
GOTERM_CC_DIRECT	GO:0005783~endoplasmic reticulum	17	13.2812	0.0197032	128	117	1590	1.80489	0.990688	0.704174	0.704174	P26641, O95433, O00429, P14625, P52306, Q02750, Q9Y2B0, P30101, Q86UE4, P20810, Q15293, Q99784, Q01105, P02768, P26885, P27797, Q14165
UP_SEQ_FEATURE	signal peptide	16	12.5	0.0736139	127	129	1603	1.56553	1	1	1	P78324, Q14697, P14625, Q9Y2B0, P30101, P22748, Q15293, Q99784, P13591, P02768, P26885, P05067, Q96JJ7, P27797, Q14165, Q8N126
UP_KEYWORDS	Endoplasmic reticulum	16	12.5	0.0774821	128	129	1604	1.55426	1	1	1	P09936, O95433, Q14697, P14625, Q9Y2B0, P30101, Q86UE4, Q15293, Q99784, Q00765, Q01105, P07099, P26885, Q96JJ7, P27797, Q14165
UP_KEYWORDS	Signal	17	13.2812	0.287598	128	173	1604	1.23139	1	1	1	P78324, Q14697, P14625, Q9Y2B0, P30101, P22748, Q15293, Q99784, P13591, P55809, P02768, P26885, P05067, Q96JJ7, P27797, Q14165, Q8N126
Annotation Cluster 3	Enrichment Score: 1.2541922200758877
Category	Term	Count	%	PValue	List Total	Pop Hits	Pop Total	Fold Enrichment	Bonferroni	Benjamini	FDR	Uniprot Accession
GOTERM_BP_DIRECT	GO:0006457~protein folding	13	10.1562	0.00163631	123	59	1536	2.75155	0.736327	1	1	P07900, Q14697, P62937, Q12931, P14625, P30101, Q02790, P62879, P26885, Q96JJ7, P27797, Q14165, Q9HAV7
GOTERM_CC_DIRECT	GO:0071682~endocytic vesicle lumen	4	3.125	0.00832457	128	6	1590	8.28125	0.859769	0.647896	0.647896	P07900, P68871, P14625, P27797
GOTERM_BP_DIRECT	GO:0006898~receptor-mediated endocytosis	5	3.90625	0.0400665	123	17	1536	3.67288	1	1	1	P07900, P68871, P14625, P02768, P27797
UP_KEYWORDS	Chaperone	9	7.03125	0.0634685	128	55	1604	2.05057	1	1	1	O95433, P07900, Q01105, Q12931, P14625, O75880, P27797, Q9HAV7, Q02790
GOTERM_MF_DIRECT	GO:0051082~unfolded protein binding	6	4.6875	0.268428	125	43	1524	1.70121	1	1	1	P07900, P62937, Q12931, P14625, P27797, Q9HAV7
GOTERM_CC_DIRECT	GO:0005576~extracellular region	7	5.46875	0.315559	128	58	1590	1.49919	1	1	1	P07900, P62937, P68871, P14625, P02768, P05067, P27797
KEGG_PATHWAY	hsa04141:Protein processing in endoplasmic reticulum	5	3.90625	0.566474	83	42	876	1.25645	1	1	1	P07900, Q14697, P14625, P30101, P27797
Annotation Cluster 4	Enrichment Score: 1.2364271516432206
Category	Term	Count	%	PValue	List Total	Pop Hits	Pop Total	Fold Enrichment	Bonferroni	Benjamini	FDR	Uniprot Accession
INTERPRO	IPR020568:Ribosomal protein S5 domain 2-type fold	5	3.90625	0.00349189	126	9	1574	6.94004	0.765	1	1	P07900, P15880, Q12931, P14625, P36776
INTERPRO	IPR001404:Heat shock protein Hsp90	3	2.34375	0.0337575	126	4	1574	9.36905	0.999999	1	1	P07900, Q12931, P14625
INTERPRO	IPR020575:Heat shock protein Hsp90, N-terminal	3	2.34375	0.0337575	126	4	1574	9.36905	0.999999	1	1	P07900, Q12931, P14625
GOTERM_BP_DIRECT	GO:0006950~response to stress	4	3.125	0.0633296	123	12	1536	4.1626	1	1	1	O95433, P07900, Q12931, P14625
UP_KEYWORDS	Chaperone	9	7.03125	0.0634685	128	55	1604	2.05057	1	1	1	O95433, P07900, Q01105, Q12931, P14625, O75880, P27797, Q9HAV7, Q02790
SMART	SM00387:HATPase_c	3	2.34375	0.0645872	59	6	797	6.75424	0.993313	1	1	P07900, Q12931, P14625
PIR_SUPERFAMILY	PIRSF002583:heat shock protein, HSP90/HTPG types	3	2.34375	0.0753649	29	4	227	5.87069	0.869614	1	1	P07900, Q12931, P14625
INTERPRO	IPR003594:Histidine kinase-like ATPase, ATP-binding domain	3	2.34375	0.0759543	126	6	1574	6.24603	1	1	1	P07900, Q12931, P14625
GOTERM_MF_DIRECT	GO:0051082~unfolded protein binding	6	4.6875	0.268428	125	43	1524	1.70121	1	1	1	P07900, P62937, Q12931, P14625, P27797, Q9HAV7
UP_KEYWORDS	Stress response	4	3.125	0.272313	128	23	1604	2.17935	1	1	1	O95433, P07900, Q12931, P14625
Annotation Cluster 5	Enrichment Score: 1.1868728966142683
Category	Term	Count	%	PValue	List Total	Pop Hits	Pop Total	Fold Enrichment	Bonferroni	Benjamini	FDR	Uniprot Accession
UP_SEQ_FEATURE	short sequence motif:Prevents secretion from ER	7	5.46875	0.000227474	127	13	1603	6.79649	0.11157	0.118514	0.118514	Q15293, Q99784, P14625, Q9Y2B0, P26885, P30101, P27797
GOTERM_CC_DIRECT	GO:0005788~endoplasmic reticulum lumen	5	3.90625	0.0116011	128	12	1590	5.17578	0.935572	0.647896	0.647896	Q14697, Q15293, P14625, P30101, P27797
GOTERM_BP_DIRECT	GO:0034975~protein folding in endoplasmic reticulum	3	2.34375	0.100951	123	7	1536	5.35192	1	1	1	P14625, P30101, P27797
GOTERM_CC_DIRECT	GO:0042470~melanosome	5	3.90625	0.508252	128	46	1590	1.3502	1	1	1	P07900, Q14697, P14625, P49327, P30101
KEGG_PATHWAY	hsa04141:Protein processing in endoplasmic reticulum	5	3.90625	0.566474	83	42	876	1.25645	1	1	1	P07900, Q14697, P14625, P30101, P27797
GOTERM_MF_DIRECT	GO:0005509~calcium ion binding	4	3.125	0.986193	125	93	1524	0.524387	1	1	1	Q15293, P14625, Q9NQ66, P27797
