# Supplementary material for: Targeting the Post-Synaptic Proteome in Alzheimer Disease with Psychosis
Source: Research Square preprint supplement (doi:10.21203/rs.3.rs-1514870/v1), 2022-04-04
Supplement: Supplementary file 11 [file 64513584a8e860a5bf42a718.xlsx]

## Sheet: Legend
Column Header	Definition
protein	Uniprot Accession #
external gene name	Official Gene Symbol
logFC	Log Base 2 of the Fold Change of AD+P relative to AD-P, adjusted for clinical and neuropathological variables
AveExpr AD+P	Average expression across all AD+P samples, in log2
AveExpr AD-P	Average expression across all AD-P samples, in log2
t	t statistic
P.Value
q.value

## Sheet: Table S2
protein	external gene name	logFC	AveExpr AD+P	AveExpr AD-P	t	P.Value	q.value
Q8IVF2	AHNAK2	-0.623429	-0.355543	0.214396	-3.10716	0.00188916	0.171043
Q9Y6B6	SAR1B	-0.707021	-0.266212	0.41148	-3.09871	0.00194384	0.171043
Q9UBL6	CPNE7	-0.623878	-0.386191	0.310475	-3.0866	0.00202479	0.171043
P07602	PSAP	-0.631335	-0.307606	0.29308	-3.06651	0.00216591	0.171043
P27708	CAD	-0.716973	-0.29376	0.357628	-3.01981	0.00252955	0.171043
Q9Y512	SAMM50	-0.659483	-0.310709	0.247058	-3.01877	0.00253826	0.171043
Q8NI60	COQ8A	-0.65316	-0.354262	0.378995	-3.01677	0.00255505	0.171043
Q8N3V7	SYNPO	-0.604393	-0.391603	0.23548	-3.01387	0.00257962	0.171043
P02549	SPTA1	-0.63778	-0.323668	0.216982	-2.96688	0.00300869	0.171043
Q9P1A6	DLGAP2	-0.594093	-0.403277	0.213438	-2.96563	0.00302093	0.171043
Q70E73	RAPH1	-0.604266	-0.339123	0.294118	-2.95941	0.0030825	0.171043
Q6NXE6	ARMC6	-0.616995	-0.364496	0.310711	-2.93774	0.00330641	0.171043
P11274	BCR	-0.587384	-0.393131	0.216592	-2.93063	0.00338306	0.171043
Q9P227	ARHGAP23	-0.60738	-0.217645	0.321579	-2.92395	0.00345646	0.171043
O00159	MYO1C	-0.581502	-0.414855	0.218229	-2.86689	0.00414555	0.171043
O95294	RASAL1	-0.576911	-0.360593	0.25569	-2.86654	0.00415021	0.171043
C9J069	AJM1	-0.581923	-0.344612	0.284041	-2.86245	0.0042041	0.171043
Q9Y566	SHANK1	-0.580972	-0.338499	0.286043	-2.85079	0.00436137	0.171043
Q6Y7W6	GIGYF2	-0.586226	-0.300621	0.296109	-2.84477	0.0044447	0.171043
P42566	EPS15	-0.593001	-0.188043	0.289643	-2.84339	0.00446391	0.171043
Q8N1I0	DOCK4	-0.569065	-0.397198	0.182461	-2.8425	0.00447649	0.171043
Q6PGP7	TTC37	-0.576673	-0.318982	0.196448	-2.82333	0.0047531	0.171043
Q9Y4F5	CEP170B	-0.567678	-0.350251	0.254935	-2.81452	0.00488533	0.171043
Q9BZL4	PPP1R12C	-0.594675	-0.313646	0.235157	-2.81112	0.00493725	0.171043
O94875	SORBS2	-0.55422	-0.399857	0.168901	-2.76922	0.00561953	0.171043
Q9Y2T2	AP3M1	-0.57841	-0.273554	0.296644	-2.76816	0.0056377	0.171043
Q9NQ86	TRIM36	-0.562923	-0.287842	0.227396	-2.75864	0.00580466	0.171043
Q9HA65	TBC1D17	-0.569863	-0.268744	0.303733	-2.75135	0.00593543	0.171043
Q08499	PDE4D	-0.628442	-0.2996	0.304385	-2.75044	0.00595189	0.171043
Q5EBM0	CMPK2	-0.63912	-0.194421	0.313081	-2.75007	0.00595863	0.171043
O15084	ANKRD28	-0.628641	-0.354776	0.281684	-2.74123	0.00612141	0.171043
Q9UPQ0	LIMCH1	-0.549459	-0.329327	0.17575	-2.73886	0.00616573	0.171043
P54803	GALC	-0.638307	-0.253543	0.223853	-2.72973	0.00633899	0.171043
Q03426	MVK	-0.550907	-0.313751	0.221965	-2.72422	0.00644575	0.171043
Q5JTZ9	AARS2	-0.618715	-0.3109	0.311426	-2.71275	0.00667306	0.171043
Q9NZ56	FMN2	-0.558514	-0.277432	0.288615	-2.70539	0.00682287	0.171043
P35609	ACTN2	-0.542154	-0.368988	0.201408	-2.70386	0.00685436	0.171043
Q6UB35	MTHFD1L	-0.584869	-0.298049	0.303337	-2.70317	0.00686858	0.171043
P49189	ALDH9A1	-0.562951	-0.229817	0.2824	-2.7011	0.00691138	0.171043
P27694	RPA1	-0.582995	-0.222744	0.241243	-2.70074	0.00691899	0.171043
Q8N387	MUC15	-0.544436	-0.337063	0.240756	-2.698	0.00697624	0.171043
Q9NQX3	GPHN	-0.539881	-0.371199	0.197877	-2.69293	0.00708307	0.171043
Q9UPA5	BSN	-0.539811	-0.3503	0.219814	-2.68916	0.00716355	0.171043
Q7Z2K8	GPRIN1	-0.546509	-0.315043	0.247719	-2.68773	0.00719444	0.171043
Q15477	SKIV2L	-0.548279	-0.295289	0.237128	-2.6866	0.0072187	0.171043
Q8IYQ7	THNSL1	-0.550169	-0.28056	0.232556	-2.68604	0.00723094	0.171043
P57737	CORO7	-0.537535	-0.337569	0.189885	-2.67919	0.00738055	0.171043
Q5JU85	IQSEC2	-0.549975	-0.294594	0.261265	-2.67796	0.00740771	0.171043
Q6PKG0	LARP1	-0.536698	-0.356059	0.188551	-2.67644	0.00744142	0.171043
Q5TBA9	FRY	-0.554978	-0.263701	0.307044	-2.67596	0.00745208	0.171043
O60518	RANBP6	-0.564968	-0.154679	0.317229	-2.67273	0.00752404	0.171043
O14490	DLGAP1	-0.537182	-0.346031	0.229969	-2.67204	0.00753967	0.171043
Q9Y5S2	CDC42BPB	-0.537525	-0.333705	0.221626	-2.67097	0.00756359	0.171043
Q14244	MAP7	-0.535176	-0.330568	0.178811	-2.66757	0.0076406	0.171043
O14773	TPP1	-0.549611	-0.280103	0.271428	-2.6669	0.00765585	0.171043
Q5M775	SPECC1	-0.548596	-0.273015	0.213037	-2.66538	0.00769056	0.171043
Q86UX6	STK32C	-0.532374	-0.46821	0.181741	-2.66117	0.00778752	0.171043
Q86YS7	C2CD5	-0.552191	-0.20975	0.320989	-2.66034	0.00780652	0.171043
Q9UHD2	TBK1	-0.532322	-0.416265	0.190353	-2.65976	0.00782014	0.171043
O15079	SNPH	-0.54785	-0.282539	0.274603	-2.65834	0.00785321	0.171043
Q86UR5	RIMS1	-0.539631	-0.320135	0.252246	-2.65511	0.00792869	0.171043
P48553	TRAPPC10	-0.531438	-0.352996	0.174504	-2.65085	0.00802935	0.171043
Q6NV74	CRACDL	-0.531669	-0.355364	0.201792	-2.65055	0.00803652	0.171043
Q86V48	LUZP1	-0.530169	-0.339928	0.166272	-2.644	0.00819367	0.171043
Q96ME1	FBXL18	-0.57107	-0.301022	0.241616	-2.6413	0.0082593	0.171043
Q96BY7	ATG2B	-0.534736	-0.320883	0.237103	-2.64085	0.00827023	0.171043
Q92871	PMM1	-0.528301	-0.405756	0.17971	-2.63955	0.00830201	0.171043
Q99569	PKP4	-0.533998	-0.318938	0.23333	-2.63797	0.00834083	0.171043
Q96PU5	NEDD4L	-0.542948	-0.268299	0.272522	-2.63124	0.00850793	0.171043
Q92597	NDRG1	-0.59718	-0.265793	0.255058	-2.63103	0.0085132	0.171043
Q8TAG9	EXOC6	-0.595898	-0.257286	0.295678	-2.6279	0.00859193	0.171043
Q9H254	SPTBN4	-0.536857	-0.287006	0.23639	-2.62396	0.00869185	0.171043
Q92667	AKAP1	-0.548467	-0.374513	0.221306	-2.6229	0.00871884	0.171043
Q9UM54	MYO6	-0.52614	-0.315902	0.166144	-2.62218	0.00873753	0.171043
Q9P2B4	CTTNBP2NL	-0.539491	-0.275698	0.254796	-2.62001	0.00879322	0.171043
Q9NZ32	ACTR10	-0.523204	-0.315092	0.144813	-2.60871	0.009089	0.171043
Q9C0H9	SRCIN1	-0.528443	-0.312	0.235611	-2.60409	0.00921238	0.171043
Q5TH69	ARFGEF3	-0.522719	-0.31857	0.184497	-2.60325	0.00923483	0.171043
Q14008	CKAP5	-0.536805	-0.24701	0.245591	-2.60151	0.00928181	0.171043
O15294	OGT	-0.522158	-0.3326	0.211371	-2.59786	0.00938106	0.171043
Q86UL8	MAGI2	-0.526845	-0.307957	0.22821	-2.59758	0.00938886	0.171043
Q6DN90	IQSEC1	-0.524761	-0.320621	0.2261	-2.59733	0.00939559	0.171043
Q5T1M5	FKBP15	-0.535676	-0.244843	0.237597	-2.59729	0.00939682	0.171043
Q9BV23	ABHD6	-0.595942	-0.281657	0.25142	-2.59628	0.00942436	0.171043
Q8NFW8	CMAS	-0.540205	-0.327169	0.167338	-2.59469	0.00946817	0.171043
Q12955	ANK3	-0.528201	-0.293226	0.225179	-2.59459	0.00947079	0.171043
O14578	CIT	-0.521079	-0.333037	0.207376	-2.59396	0.0094883	0.171043
O00562	PITPNM1	-0.536248	-0.247018	0.299338	-2.5814	0.00984055	0.171043
P42226	STAT6	-0.570076	-0.336824	0.230021	-2.58089	0.00985498	0.171043
Q5SW79	CEP170	-0.534188	-0.24151	0.273593	-2.57766	0.00994778	0.171043
Q13510	ASAH1	-0.531866	-0.261681	0.269278	-2.57618	0.0099904	0.171043
Q02156	PRKCE	-0.519201	-0.32941	0.231832	-2.57258	0.0100948	0.171043
Q8IZD9	DOCK3	-0.515499	-0.34569	0.188683	-2.56999	0.0101707	0.171043
Q5T5Y3	CAMSAP1	-0.514489	-0.36482	0.145193	-2.56971	0.010179	0.171043
P45974	USP5	-0.52401	-0.293251	0.233763	-2.56823	0.0102225	0.171043
Q96Q04	LMTK3	-0.548185	-0.286739	0.241262	-2.56529	0.0103096	0.171043
P52943	CRIP2	-0.520748	-0.267465	0.186416	-2.56202	0.0104071	0.171043
Q9UPX8	SHANK2	-0.547247	-0.329457	0.240947	-2.55517	0.0106142	0.171043
P42261	GRIA1	-0.51586	-0.336369	0.246001	-2.55321	0.0106741	0.171043
O00401	WASL	-0.515412	-0.311886	0.212489	-2.55244	0.0106978	0.171043
Q86T65	DAAM2	-0.530019	-0.21828	0.259682	-2.55242	0.0106984	0.171043
Q8NF91	SYNE1	-0.520486	-0.286294	0.223971	-2.55167	0.0107214	0.171043
P35579	MYH9	-0.518388	-0.296381	0.228488	-2.54682	0.0108716	0.171043
Q9C0D0	PHACTR1	-0.50992	-0.404776	0.200193	-2.54657	0.0108794	0.171043
Q9NQC7	CYLD	-0.509904	-0.395385	0.188653	-2.54647	0.0108824	0.171043
Q12849	GRSF1	-0.564376	-0.320816	0.275854	-2.54599	0.0108972	0.171043
P40763	STAT3	-0.520367	-0.27401	0.217005	-2.54542	0.0109152	0.171043
Q92974	ARHGEF2	-0.514764	-0.308853	0.220185	-2.54321	0.0109845	0.171043
P54646	PRKAA2	-0.518643	-0.322609	0.270688	-2.54188	0.0110265	0.171043
P61601	NCALD	-0.509706	-0.314735	0.166072	-2.54019	0.0110798	0.171043
Q99490	AGAP2	-0.510495	-0.34733	0.229895	-2.53983	0.0110912	0.171043
P52824	DGKQ	-0.520501	-0.293909	0.251644	-2.53977	0.011093	0.171043
Q7Z406	MYH14	-0.518337	-0.27465	0.211762	-2.53953	0.0111008	0.171043
Q9UPT6	MAPK8IP3	-0.510745	-0.298493	0.174746	-2.539	0.0111174	0.171043
Q6PD74	AAGAB	-0.549677	-0.309785	0.235301	-2.53856	0.0111317	0.171043
Q96CS3	FAF2	-0.516587	-0.301484	0.234232	-2.53838	0.0111372	0.171043
Q3V6T2	CCDC88A	-0.508837	-0.348413	0.178347	-2.53753	0.0111642	0.171043
Q8NFZ8	CADM4	-0.523494	-0.216856	0.181126	-2.53115	0.0113694	0.171043
Q96RR4	CAMKK2	-0.510339	-0.322565	0.224326	-2.52812	0.0114682	0.171043
O14531	DPYSL4	-0.52172	-0.237584	0.236456	-2.52778	0.0114791	0.171043
P00505	GOT2	-0.51191	-0.287076	0.195564	-2.52761	0.0114848	0.171043
O75592	MYCBP2	-0.505592	-0.377172	0.150306	-2.52581	0.0115437	0.171043
Q99767	APBA2	-0.510826	-0.332348	0.187508	-2.52297	0.0116374	0.171043
Q9Y5W7	SNX14	-0.574358	-0.316655	0.305232	-2.52266	0.0116477	0.171043
Q15149	PLEC	-0.52054	-0.219382	0.221262	-2.51986	0.0117408	0.171043
P24821	TNC	-0.50593	-0.285838	0.144209	-2.51951	0.0117522	0.171043
Q15031	LARS2	-0.519395	-0.263735	0.255998	-2.51946	0.011754	0.171043
Q9Y3P9	RABGAP1	-0.540426	-0.206996	0.286523	-2.5154	0.0118902	0.171043
Q08495	DMTN	-0.511195	-0.291281	0.217663	-2.51419	0.011931	0.171043
Q09019	DMWD	-0.516158	-0.289613	0.254786	-2.51343	0.0119568	0.171043
Q8TDC3	BRSK1	-0.509816	-0.320741	0.250578	-2.5099	0.012077	0.171043
P02679	FGG	-0.512756	-0.316283	0.139948	-2.50788	0.0121463	0.171043
P42345	MTOR	-0.506124	-0.29191	0.185994	-2.50716	0.0121711	0.171043
P55196	AFDN	-0.520766	-0.232934	0.282006	-2.50677	0.0121844	0.171043
Q96RY7	IFT140	-0.530707	-0.223982	0.262412	-2.50546	0.01223	0.171043
Q2NKQ1	SGSM1	-0.501519	-0.339015	0.148347	-2.50225	0.0123414	0.171043
Q9UQB3	CTNND2	-0.503595	-0.309969	0.198071	-2.49985	0.0124253	0.171043
Q27J81	INF2	-0.50474	-0.275714	0.169288	-2.49846	0.0124739	0.171043
Q7Z460	CLASP1	-0.514053	-0.149935	0.316173	-2.49664	0.0125382	0.171043
Q13131	PRKAA1	-0.50471	-0.301888	0.205978	-2.49634	0.0125487	0.171043
Q9Y4H2	IRS2	-0.511083	-0.299202	0.255438	-2.49553	0.0125773	0.171043
Q9NZJ9	NUDT4	-0.52672	-0.255556	0.249275	-2.49297	0.0126687	0.171043
P11498	PC	-0.516953	-0.220426	0.252226	-2.49277	0.0126755	0.171043
P42224	STAT1	-0.513544	-0.267605	0.252561	-2.4924	0.012689	0.171043
Q13045	FLII	-0.500496	-0.299798	0.171378	-2.48973	0.0127848	0.171043
O75912	DGKI	-0.53292	-0.353331	0.249837	-2.4896	0.0127891	0.171043
Q15042	RAB3GAP1	-0.511711	-0.286361	0.257824	-2.48847	0.0128298	0.171043
P05129	PRKCG	-0.50396	-0.327898	0.246616	-2.48846	0.0128302	0.171043
O95219	SNX4	-0.509119	-0.296933	0.249711	-2.48783	0.0128532	0.171043
Q9H269	VPS16	-0.504686	-0.295501	0.214439	-2.48727	0.0128732	0.171043
Q12979	ABR	-0.499432	-0.334153	0.207165	-2.48669	0.0128942	0.171043
Q96EK5	KIFBP	-0.497818	-0.33635	0.144302	-2.48383	0.0129983	0.171043
Q8N4C8	MINK1	-0.49734	-0.385636	0.177183	-2.48367	0.0130041	0.171043
Q92736	RYR2	-0.506784	-0.293003	0.234727	-2.48297	0.0130299	0.171043
Q5VZE5	NAA35	-0.528281	-0.191106	0.286778	-2.47997	0.0131398	0.171043
O75962	TRIO	-0.498648	-0.313936	0.191623	-2.47977	0.0131475	0.171043
O43236	SEPTIN4	-0.51034	-0.251245	0.222888	-2.4787	0.0131868	0.171043
Q96CV9	OPTN	-0.500242	-0.313588	0.214	-2.47763	0.0132264	0.171043
Q5T0F9	CC2D1B	-0.515353	-0.18232	0.238914	-2.47671	0.0132604	0.171043
Q96PX6	CCDC85A	-0.526533	-0.288858	0.255337	-2.47598	0.0132878	0.171043
P53355	DAPK1	-0.530529	-0.27842	0.23284	-2.47406	0.0133593	0.171043
P54652	HSPA2	-0.506476	-0.238182	0.179464	-2.47266	0.0134119	0.171043
Q8IYB4	PEX5L	-0.505314	-0.27901	0.222396	-2.47236	0.0134229	0.171043
P02792	FTL	-0.508914	-0.255078	0.234319	-2.47036	0.0134985	0.171043
P11277	SPTB	-0.502174	-0.273979	0.201112	-2.46668	0.0136376	0.171043
O60733	PLA2G6	-0.499726	-0.312519	0.22982	-2.46616	0.0136577	0.171043
Q8IWB9	TEX2	-0.525259	-0.288438	0.229007	-2.46537	0.0136879	0.171043
Q9BST9	RTKN	-0.499124	-0.253758	0.152604	-2.46511	0.0136978	0.171043
Q14185	DOCK1	-0.540549	-0.240941	0.217879	-2.46375	0.0137497	0.171043
Q9HD20	ATP13A1	-0.499557	-0.302808	0.222936	-2.46238	0.0138026	0.171043
Q86VW0	SESTD1	-0.506474	-0.336299	0.131066	-2.46236	0.0138033	0.171043
Q9UPQ3	AGAP1	-0.517661	-0.293225	0.242013	-2.4619	0.0138207	0.171043
Q92614	MYO18A	-0.499965	-0.281751	0.201899	-2.46124	0.0138463	0.171043
Q96P47	AGAP3	-0.497687	-0.315664	0.229104	-2.45865	0.0139466	0.171043
Q8N1G4	LRRC47	-0.51102	-0.204057	0.283424	-2.4564	0.0140343	0.171043
O75037	KIF21B	-0.555296	-0.268819	0.25441	-2.45632	0.0140374	0.171043
P12814	ACTN1	-0.492369	-0.345148	0.160957	-2.45623	0.014041	0.171043
Q9UPP2	IQSEC3	-0.492743	-0.344867	0.200552	-2.45585	0.0140559	0.171043
Q8N9I9	DTX3	-0.510566	-0.257186	0.320615	-2.45559	0.0140659	0.171043
Q6GYQ0	RALGAPA1	-0.510025	-0.190877	0.284253	-2.45452	0.014108	0.171043
O94832	MYO1D	-0.494811	-0.270368	0.152162	-2.45449	0.014109	0.171043
O75155	CAND2	-0.526714	-0.298584	0.246934	-2.4541	0.0141245	0.171043
Q15700	DLG2	-0.503104	-0.268972	0.222655	-2.45352	0.0141472	0.171043
Q86SZ2	TRAPPC6B	-0.508708	-0.251621	0.294225	-2.4521	0.0142031	0.171043
P02671	FGA	-0.494165	-0.283356	0.168768	-2.45114	0.0142411	0.171043
Q03001	DST	-0.504125	-0.234177	0.195308	-2.45024	0.0142766	0.171043
Q7L8L6	FASTKD5	-0.5415	-0.290825	0.27221	-2.4486	0.0143419	0.171043
Q4V328	GRIPAP1	-0.501198	-0.298217	0.252738	-2.44821	0.0143574	0.171043
Q9NXD2	MTMR10	-0.490399	-0.290843	0.118069	-2.44494	0.0144881	0.171043
Q8NFX7	STXBP6	-0.494847	-0.289126	0.196449	-2.44429	0.0145144	0.171043
O75145	PPFIA3	-0.503286	-0.265138	0.246739	-2.44308	0.014563	0.171043
Q9H7D7	WDR26	-0.503495	-0.265828	0.25546	-2.44283	0.0145734	0.171043
Q16822	PCK2	-0.500935	-0.256028	0.207767	-2.44215	0.0146009	0.171043
O14827	RASGRF2	-0.489238	-0.352123	0.154499	-2.44178	0.0146157	0.171043
Q8TAF3	WDR48	-0.504191	-0.255736	0.263687	-2.44161	0.0146226	0.171043
Q5T5U3	ARHGAP21	-0.492119	-0.298043	0.18748	-2.44085	0.0146534	0.171043
Q96T49	PPP1R16B	-0.488293	-0.394882	0.15096	-2.44017	0.0146809	0.171043
O60447	EVI5	-0.541127	-0.307154	0.247813	-2.43965	0.0147021	0.171043
Q16531	DDB1	-0.489203	-0.374015	0.229106	-2.43864	0.0147433	0.171043
P49815	TSC2	-0.500543	-0.278369	0.238543	-2.43864	0.0147434	0.171043
Q9BW30	TPPP3	-0.490329	-0.28353	0.154046	-2.43822	0.0147605	0.171043
O75140	DEPDC5	-0.509936	-0.302867	0.144688	-2.43747	0.0147909	0.171043
Q99570	PIK3R4	-0.490862	-0.294484	0.186401	-2.43295	0.0149772	0.171043
Q15751	HERC1	-0.496637	-0.293648	0.17136	-2.4326	0.0149915	0.171043
O14974	PPP1R12A	-0.488091	-0.296127	0.141136	-2.43256	0.0149933	0.171043
Q8TEQ0	SNX29	-0.550345	-0.280457	0.230047	-2.4314	0.0150412	0.171043
O60285	NUAK1	-0.509358	-0.299077	0.237063	-2.43022	0.0150901	0.171043
O75122	CLASP2	-0.503727	-0.212627	0.238891	-2.43015	0.0150932	0.171043
Q96A23	CPNE4	-0.490209	-0.313702	0.215421	-2.42731	0.015212	0.171043
P46199	MTIF2	-0.501852	-0.25314	0.222974	-2.42201	0.0154355	0.171043
Q9ULJ8	PPP1R9A	-0.486103	-0.32412	0.197502	-2.41945	0.0155447	0.171043
P78559	MAP1A	-0.496456	-0.245254	0.195982	-2.4193	0.015551	0.171043
Q9BPU6	DPYSL5	-0.494303	-0.256161	0.1957	-2.41722	0.0156401	0.171043
Q2M3C7	SPHKAP	-0.496817	-0.254316	0.23394	-2.41152	0.015887	0.171043
Q07002	CDK18	-0.485276	-0.310064	0.193363	-2.41079	0.0159185	0.171043
Q13490	BIRC2	-0.548228	-0.298253	0.216132	-2.4105	0.0159314	0.171043
Q9UEW8	STK39	-0.494794	-0.273597	0.240782	-2.40666	0.0160999	0.171043
Q14012	CAMK1	-0.491119	-0.286023	0.22759	-2.40519	0.0161647	0.171043
P51784	USP11	-0.51612	-0.321318	0.248954	-2.40458	0.0161917	0.171043
Q96TC7	RMDN3	-0.488458	-0.301916	0.228834	-2.40364	0.0162333	0.171043
O43759	SYNGR1	-0.481561	-0.356985	0.191421	-2.40138	0.0163338	0.171043
O60381	HBP1	-0.498702	-0.14875	0.231204	-2.39999	0.0163961	0.171043
Q9NZH0	GPRC5B	-0.492935	-0.259328	0.13262	-2.3997	0.016409	0.171043
Q9UJF2	RASAL2	-0.480158	-0.39472	0.165913	-2.39902	0.0164399	0.171043
Q8NAN2	MIGA1	-0.495448	-0.314971	0.19172	-2.39834	0.0164701	0.171043
Q92796	DLG3	-0.491527	-0.246012	0.19188	-2.39818	0.0164772	0.171043
Q9NRY4	ARHGAP35	-0.483571	-0.300678	0.193867	-2.39696	0.0165324	0.171043
P78357	CNTNAP1	-0.483656	-0.299623	0.194882	-2.39625	0.0165645	0.171043
Q8N9B5	JMY	-0.524407	-0.307598	0.27556	-2.39604	0.0165738	0.171043
Q02108	GUCY1A1	-0.542369	-0.115078	0.273252	-2.3957	0.0165892	0.171043
Q13224	GRIN2B	-0.493275	-0.278572	0.259111	-2.39542	0.016602	0.171043
O60610	DIAPH1	-0.497855	-0.2157	0.268944	-2.39439	0.0166486	0.171043
Q7L099	RUFY3	-0.494665	-0.242259	0.257492	-2.39242	0.0167384	0.171043
O15034	RIMBP2	-0.513871	-0.314775	0.25137	-2.38818	0.0169329	0.171043
Q8NC51	SERBP1	-0.497305	-0.338951	0.143088	-2.38809	0.0169369	0.171043
Q9UPN3	MACF1	-0.494008	-0.207502	0.223625	-2.38618	0.0170249	0.171043
Q9Y4G6	TLN2	-0.495011	-0.20493	0.236415	-2.38583	0.0170415	0.171043
Q96SW2	CRBN	-0.496093	-0.18162	0.262295	-2.38562	0.017051	0.171043
P53618	COPB1	-0.491755	-0.233222	0.228612	-2.38312	0.0171673	0.171043
P07437	TUBB	-0.484016	-0.275355	0.196496	-2.3812	0.017257	0.171043
Q07157	TJP1	-0.476844	-0.318506	0.119023	-2.37939	0.0173421	0.171043
P42704	LRPPRC	-0.490869	-0.236399	0.233092	-2.37872	0.0173736	0.171043
P28838	LAP3	-0.4767	-0.29973	0.142262	-2.37598	0.0175032	0.171043
Q9UQM7	CAMK2A	-0.484997	-0.293343	0.235996	-2.3757	0.0175164	0.171043
Q96JH7	VCPIP1	-0.479621	-0.3103	0.211347	-2.37479	0.0175598	0.171043
O95886	DLGAP3	-0.486765	-0.291378	0.250976	-2.37373	0.0176102	0.171043
Q8WXD9	CASKIN1	-0.479495	-0.30488	0.205678	-2.37361	0.017616	0.171043
P46379	BAG6	-0.486069	-0.290803	0.244665	-2.37353	0.0176194	0.171043
Q9BX66	SORBS1	-0.477783	-0.293811	0.174179	-2.3731	0.01764	0.171043
Q14289	PTK2B	-0.483407	-0.28408	0.217537	-2.37216	0.0176849	0.171043
Q8NDA8	MROH1	-0.474767	-0.363263	0.131848	-2.37186	0.0176994	0.171043
Q9NVE7	PANK4	-0.481661	-0.29161	0.21621	-2.37001	0.0177881	0.171043
Q9Y5L0	TNPO3	-0.485539	-0.265024	0.216499	-2.36854	0.017859	0.171043
Q9UPR0	PLCL2	-0.488376	-0.231526	0.223898	-2.3673	0.0179191	0.171043
Q9H2M9	RAB3GAP2	-0.483142	-0.282499	0.22584	-2.36446	0.018057	0.171043
Q15126	PMVK	-0.474248	-0.313439	0.158833	-2.3638	0.0180895	0.171043
O43865	AHCYL1	-0.473808	-0.327615	0.158877	-2.3625	0.0181528	0.171043
Q92947	GCDH	-0.538632	-0.283676	0.29282	-2.36034	0.0182589	0.171043
Q5T4S7	UBR4	-0.479077	-0.266919	0.17994	-2.36033	0.0182595	0.171043
Q6DN14	MCTP1	-0.481457	-0.308503	0.253316	-2.35942	0.0183042	0.171043
Q9Y243	AKT3	-0.53316	-0.0938949	0.23083	-2.35922	0.0183142	0.171043
Q96T76	MMS19	-0.472833	-0.335832	0.144633	-2.3591	0.0183199	0.171043
P26639	TARS1	-0.48749	-0.21797	0.222475	-2.35906	0.0183218	0.171043
Q92574	TSC1	-0.479953	-0.292364	0.222681	-2.35843	0.0183531	0.171043
Q7Z6G8	ANKS1B	-0.477525	-0.326427	0.244795	-2.35792	0.0183785	0.171043
P60484	PTEN	-0.472992	-0.33165	0.196515	-2.35628	0.0184599	0.171043
P02794	FTH1	-0.482425	-0.248448	0.192841	-2.35496	0.0185254	0.171043
P09543	CNP	-0.481042	-0.240176	0.175234	-2.35262	0.0186422	0.171043
Q14643	ITPR1	-0.480426	-0.253908	0.188732	-2.35192	0.0186773	0.171043
Q7L1I2	SV2B	-0.470435	-0.446838	0.100011	-2.35141	0.0187033	0.171043
Q96JJ3	ELMO2	-0.486284	-0.237409	0.259108	-2.34954	0.0187974	0.171043
P09417	QDPR	-0.482692	-0.24784	0.206014	-2.34884	0.0188326	0.171043
Q9Y2J8	PADI2	-0.483567	-0.199184	0.165742	-2.34705	0.0189234	0.171043
P01859	IGHG2	-0.49501	-0.257896	0.120479	-2.34656	0.0189484	0.171043
Q9Y6D5	ARFGEF2	-0.483326	-0.256486	0.23471	-2.34643	0.0189549	0.171043
Q12933	TRAF2	-0.478553	-0.250306	0.17923	-2.34582	0.0189859	0.171043
Q9NV70	EXOC1	-0.485245	-0.216839	0.230679	-2.34531	0.0190119	0.171043
Q9UL18	AGO1	-0.522415	-0.308847	0.19554	-2.3441	0.0190738	0.171043
Q9NQW6	ANLN	-0.475281	-0.243288	0.146296	-2.34373	0.0190925	0.171043
Q6IAN0	DHRS7B	-0.477547	-0.308228	0.248422	-2.34306	0.0191271	0.171043
Q5TCZ1	SH3PXD2A	-0.47926	-0.144108	0.36222	-2.3413	0.0192177	0.171043
Q96CW5	TUBGCP3	-0.468109	-0.382586	0.0983824	-2.33986	0.0192915	0.171043
P41594	GRM5	-0.48104	-0.272284	0.240596	-2.33913	0.0193294	0.171043
Q92556	ELMO1	-0.484843	-0.211183	0.239955	-2.33814	0.0193805	0.171043
Q14156	EFR3A	-0.505853	-0.20086	0.2304	-2.3381	0.0193826	0.171043
Q9Y6D6	ARFGEF1	-0.486451	-0.1986	0.25966	-2.3378	0.0193982	0.171043
Q9Y4G8	RAPGEF2	-0.482077	-0.237177	0.230672	-2.33683	0.0194486	0.171043
O94979	SEC31A	-0.479166	-0.239404	0.186012	-2.33651	0.0194652	0.171043
Q9NZN5	ARHGEF12	-0.474293	-0.275049	0.19245	-2.33545	0.0195204	0.171043
O75157	TSC22D2	-0.539952	-0.210752	0.201939	-2.33516	0.0195359	0.171043
Q5U4P2	ASPHD1	-0.510659	-0.305337	0.256057	-2.33513	0.0195375	0.171043
Q7RTP6	MICAL3	-0.480789	-0.233241	0.225074	-2.33073	0.0197684	0.171043
Q9Y4I1	MYO5A	-0.475198	-0.270302	0.2029	-2.33025	0.0197935	0.171043
Q9Y608	LRRFIP2	-0.531897	-0.277104	0.272604	-2.32992	0.019811	0.171043
Q9C0H5	ARHGAP39	-0.474671	-0.284637	0.217294	-2.32987	0.0198135	0.171043
P60201	PLP1	-0.477927	-0.229183	0.174694	-2.32963	0.0198266	0.171043
O15020	SPTBN2	-0.48335	-0.197755	0.230289	-2.32874	0.0198735	0.171043
O75146	HIP1R	-0.481906	-0.187364	0.195155	-2.32872	0.0198744	0.171043
O75508	CLDN11	-0.468974	-0.263213	0.138822	-2.3282	0.0199023	0.171043
Q9P0V9	SEPTIN10	-0.474136	-0.254661	0.179401	-2.32741	0.0199441	0.171043
Q9NS86	LANCL2	-0.476309	-0.278797	0.227484	-2.32717	0.0199571	0.171043
Q9NUQ8	ABCF3	-0.479421	-0.275175	0.269505	-2.32568	0.0200362	0.171043
Q14764	MVP	-0.466306	-0.307949	0.138424	-2.32488	0.020079	0.171043
O95163	ELP1	-0.502256	-0.19249	0.210991	-2.32427	0.020112	0.171043
P36873	PPP1CC	-0.480456	-0.313402	0.251114	-2.32275	0.0201931	0.171043
P30876	POLR2B	-0.471014	-0.285294	0.199985	-2.32219	0.0202234	0.171043
O60716	CTNND1	-0.465791	-0.319342	0.182566	-2.32018	0.0203321	0.171043
P11137	MAP2	-0.478174	-0.23533	0.217209	-2.31997	0.0203431	0.171043
P23677	ITPKA	-0.473432	-0.291507	0.232819	-2.31958	0.0203641	0.171043
P29323	EPHB2	-0.491999	-0.230846	0.244925	-2.31856	0.0204199	0.171043
A6NGB9	WIPF3	-0.481142	-0.236869	0.278421	-2.3184	0.0204285	0.171043
Q9NZQ3	NCKIPSD	-0.470646	-0.303192	0.22816	-2.31728	0.0204891	0.171043
Q9H3S7	PTPN23	-0.473737	-0.248513	0.185814	-2.31683	0.0205138	0.171043
Q17R89	ARHGAP44	-0.477377	-0.266495	0.252221	-2.31671	0.0205202	0.171043
Q96RL7	VPS13A	-0.465683	-0.304172	0.178237	-2.31616	0.0205505	0.171043
Q86XP1	DGKH	-0.516038	-0.373328	0.216826	-2.31593	0.0205627	0.171043
Q92529	SHC3	-0.470805	-0.306636	0.236621	-2.31572	0.0205742	0.171043
Q9BZZ5	API5	-0.498764	-0.243898	0.2289	-2.31552	0.0205855	0.171043
P08572	COL4A2	-0.49009	-0.253994	0.176585	-2.31533	0.0205956	0.171043
Q8IWV7	UBR1	-0.499982	-0.131223	0.243655	-2.3148	0.0206246	0.171043
P27816	MAP4	-0.464875	-0.285907	0.149032	-2.31394	0.0206719	0.171043
O60861	GAS7	-0.473557	-0.287839	0.24294	-2.31131	0.0208166	0.171043
O43293	DAPK3	-0.51112	-0.25383	0.215891	-2.3107	0.0208502	0.171043
Q96SB3	PPP1R9B	-0.465261	-0.316801	0.207765	-2.30914	0.0209367	0.171043
Q9Y3S1	WNK2	-0.470765	-0.271222	0.206083	-2.30728	0.0210397	0.171043
O00291	HIP1	-0.528108	-0.139529	0.195307	-2.30463	0.0211879	0.171043
Q76N89	HECW1	-0.46506	-0.321102	0.221017	-2.3045	0.0211952	0.171043
Q9Y6K8	AK5	-0.467716	-0.302334	0.228164	-2.30225	0.021322	0.171043
Q92599	SEPTIN8	-0.466891	-0.274941	0.186521	-2.30211	0.0213299	0.171043
O60645	EXOC3	-0.475534	-0.218306	0.220184	-2.30192	0.0213405	0.171043
O95140	MFN2	-0.473121	-0.276504	0.248056	-2.29971	0.0214653	0.171043
O60486	PLXNC1	-0.523287	-0.284605	0.3246	-2.29941	0.0214826	0.171043
Q86YM7	HOMER1	-0.461768	-0.318762	0.1893	-2.29875	0.02152	0.171043
P62854	RPS26	-0.466031	-0.315439	0.177253	-2.29856	0.0215305	0.171043
Q13144	EIF2B5	-0.474529	-0.239103	0.22674	-2.29745	0.0215937	0.171043
Q8N3R9	PALS1	-0.472309	-0.249509	0.210391	-2.29736	0.0215992	0.171043
O94850	DDN	-0.483312	-0.305662	0.192605	-2.29707	0.0216156	0.171043
Q9H4G4	GLIPR2	-0.46391	-0.258518	0.150079	-2.29523	0.0217208	0.171043
P11532	DMD	-0.497871	-0.169798	0.224132	-2.29455	0.0217595	0.171043
P14618	PKM	-0.46917	-0.25792	0.199645	-2.29327	0.0218331	0.171043
Q8NEY1	NAV1	-0.488066	-0.294445	0.209381	-2.2932	0.0218375	0.171043
Q13136	PPFIA1	-0.488652	-0.246321	0.181901	-2.2919	0.0219123	0.171043
O75131	CPNE3	-0.469999	-0.242689	0.190277	-2.29174	0.0219214	0.171043
Q8N5S9	CAMKK1	-0.473056	-0.24115	0.245422	-2.29082	0.0219743	0.171043
Q02952	AKAP12	-0.471179	-0.231867	0.194495	-2.2893	0.0220626	0.171043
Q8N9N7	LRRC57	-0.46041	-0.309052	0.19228	-2.28719	0.0221854	0.171043
Q9UHY1	NRBP1	-0.463828	-0.260444	0.170661	-2.28579	0.0222672	0.171043
O75044	SRGAP2	-0.473578	-0.203356	0.224344	-2.28562	0.0222773	0.171043
P02042	HBD	-0.47651	-0.308509	0.0664989	-2.28556	0.022281	0.171043
Q8N568	DCLK2	-0.470674	-0.23083	0.234552	-2.27874	0.022683	0.171043
Q96A00	PPP1R14A	-0.503039	-0.23188	0.131286	-2.27857	0.0226931	0.171043
Q14166	TTLL12	-0.473622	-0.197426	0.247374	-2.27762	0.0227498	0.171043
Q16352	INA	-0.457662	-0.291039	0.160428	-2.27663	0.022809	0.171043
O95834	EML2	-0.471993	-0.198164	0.226444	-2.27533	0.0228871	0.171043
Q6ZT12	UBR3	-0.48019	-0.252493	0.212923	-2.27346	0.0229995	0.171043
Q68DU8	KCTD16	-0.471078	-0.230232	0.258478	-2.27343	0.023001	0.171043
Q8IXI2	RHOT1	-0.471661	-0.230384	0.269087	-2.27307	0.0230227	0.171043
Q6UWE0	LRSAM1	-0.467325	-0.249335	0.215745	-2.27079	0.0231602	0.171043
Q15334	LLGL1	-0.467752	-0.223535	0.194393	-2.27061	0.0231711	0.171043
P61962	DCAF7	-0.471918	-0.261557	0.197007	-2.27048	0.0231795	0.171043
Q01082	SPTBN1	-0.46828	-0.224542	0.215688	-2.26977	0.0232222	0.171043
Q8IU85	CAMK1D	-0.458714	-0.301753	0.204273	-2.26956	0.0232352	0.171043
O43149	ZZEF1	-0.526774	-0.180645	0.280591	-2.26942	0.0232437	0.171043
Q9UPW8	UNC13A	-0.454738	-0.339576	0.14303	-2.26927	0.0232529	0.171043
Q9NXC5	MIOS	-0.525156	-0.271108	0.307481	-2.2687	0.0232872	0.171043
P41743	PRKCI	-0.467555	-0.230195	0.219057	-2.26703	0.0233894	0.171043
Q14204	DYNC1H1	-0.467761	-0.218356	0.21144	-2.26653	0.0234194	0.171043
Q9P1Z2	CALCOCO1	-0.470805	-0.245223	0.297282	-2.26632	0.0234324	0.171043
Q9BZR6	RTN4R	-0.493632	-0.272561	0.164332	-2.26573	0.0234689	0.171043
O94805	ACTL6B	-0.510617	-0.258898	0.272937	-2.26561	0.0234761	0.171043
Q8N9F0	NAT8L	-0.462121	-0.274196	0.212335	-2.26342	0.0236104	0.171043
P22234	PAICS	-0.457186	-0.305959	0.2101	-2.26174	0.0237141	0.171043
Q53GT1	KLHL22	-0.454291	-0.321032	0.191753	-2.26164	0.0237206	0.171043
Q96EY7	PTCD3	-0.510082	-0.312698	0.255945	-2.26121	0.0237473	0.171043
Q14183	DOC2A	-0.512366	-0.351159	0.285073	-2.25977	0.0238363	0.171043
Q8WXI2	CNKSR2	-0.463379	-0.259882	0.211969	-2.2594	0.0238595	0.171043
Q5H9R7	PPP6R3	-0.465895	-0.221193	0.208942	-2.25873	0.0239008	0.171043
Q9H9H5	MAP6D1	-0.455853	-0.239916	0.119866	-2.25853	0.0239135	0.171043
P46821	MAP1B	-0.457306	-0.270502	0.173854	-2.25846	0.0239179	0.171043
Q684P5	RAP1GAP2	-0.468219	-0.202756	0.229534	-2.25792	0.0239512	0.171043
Q7KZI7	MARK2	-0.456123	-0.290305	0.190939	-2.25626	0.0240552	0.171043
A6NL88	SHISA7	-0.458314	-0.310634	0.238424	-2.25605	0.0240681	0.171043
P53816	PLAAT3	-0.491833	-0.255623	0.118214	-2.2558	0.0240837	0.171043
O00471	EXOC5	-0.464448	-0.23344	0.205	-2.25493	0.0241384	0.171043
Q9UQB8	BAIAP2	-0.455465	-0.299542	0.200398	-2.25399	0.0241973	0.171043
P05090	APOD	-0.46414	-0.214653	0.183252	-2.25308	0.0242548	0.171043
Q9NZB2	FAM120A	-0.463397	-0.258973	0.233947	-2.25043	0.0244222	0.171043
Q5T8D3	ACBD5	-0.48219	-0.242768	0.203786	-2.24807	0.0245723	0.171043
Q6A555	TXNDC8	-0.499396	-0.228947	0.206366	-2.24726	0.0246244	0.171043
Q6P9F7	LRRC8B	-0.464518	-0.26947	0.236683	-2.24561	0.0247297	0.171043
Q9UQC2	GAB2	-0.495599	-0.285668	0.221459	-2.24553	0.0247352	0.171043
Q9P253	VPS18	-0.464644	-0.227909	0.246837	-2.24508	0.0247638	0.171043
O00178	GTPBP1	-0.466679	-0.221895	0.275402	-2.24466	0.0247905	0.171043
Q6NTF9	RHBDD2	-0.459496	-0.310375	0.268175	-2.2444	0.0248072	0.171043
P42262	GRIA2	-0.453883	-0.316084	0.227402	-2.24328	0.0248795	0.171043
P38117	ETFB	-0.462389	-0.214215	0.201843	-2.2414	0.025001	0.171043
Q93008	USP9X	-0.466174	-0.139933	0.206054	-2.24117	0.0250156	0.171043
O00411	POLRMT	-0.494411	-0.249848	0.113509	-2.23909	0.025151	0.171043
P29144	TPP2	-0.447985	-0.374883	0.113227	-2.239	0.0251567	0.171043
P78352	DLG4	-0.451869	-0.301186	0.202345	-2.23625	0.0253361	0.171043
O75170	PPP6R2	-0.465118	-0.188385	0.239718	-2.23614	0.0253433	0.171043
P21359	NF1	-0.455203	-0.271722	0.201432	-2.23411	0.0254766	0.171043
Q13557	CAMK2D	-0.459291	-0.282844	0.252848	-2.23379	0.025498	0.171043
Q9UG63	ABCF2	-0.460612	-0.232213	0.222778	-2.23312	0.0255417	0.171043
Q8IXS6	PALM2AKAP2	-0.462878	-0.166724	0.280745	-2.23276	0.0255658	0.171043
Q14832	GRM3	-0.459016	-0.265058	0.231084	-2.23222	0.0256015	0.171043
Q9UQD0	SCN8A	-0.461918	-0.189908	0.186527	-2.23184	0.0256262	0.171043
Q9NRD5	PICK1	-0.462312	-0.201705	0.224126	-2.23068	0.0257035	0.171043
P07339	CTSD	-0.458519	-0.263271	0.227028	-2.23054	0.0257125	0.171043
O00186	STXBP3	-0.453607	-0.22276	0.13392	-2.22972	0.0257668	0.171043
Q96I34	PPP1R16A	-0.500879	-0.200005	0.292174	-2.22963	0.0257727	0.171043
Q9Y2X7	GIT1	-0.458816	-0.252347	0.221085	-2.22906	0.0258105	0.171043
P05771	PRKCB	-0.457024	-0.27737	0.233765	-2.2285	0.0258483	0.171043
Q9P0L0	VAPA	-0.457248	-0.253367	0.208049	-2.22723	0.0259328	0.171043
O75334	PPFIA2	-0.4511	-0.288553	0.197918	-2.2271	0.0259411	0.171043
P00390	GSR	-0.491988	-0.286787	0.188319	-2.22445	0.026119	0.171043
Q14258	TRIM25	-0.478354	-0.22808	0.216492	-2.22408	0.026144	0.171043
P43897	TSFM	-0.456154	-0.276364	0.235819	-2.22249	0.0262513	0.171043
P35580	MYH10	-0.455368	-0.265362	0.215212	-2.22227	0.0262657	0.171043
Q9NSY0	NRBP2	-0.446716	-0.286344	0.117693	-2.22201	0.0262832	0.171043
Q04446	GBE1	-0.46325	-0.146775	0.234982	-2.22093	0.0263563	0.171043
P53667	LIMK1	-0.445418	-0.326947	0.190104	-2.21898	0.0264887	0.171043
Q7Z4S6	KIF21A	-0.451646	-0.270763	0.196416	-2.21887	0.0264965	0.171043
Q8TF61	FBXO41	-0.444661	-0.335882	0.151043	-2.21812	0.0265474	0.171043
Q96PV0	SYNGAP1	-0.445984	-0.321464	0.202069	-2.2176	0.0265832	0.171043
Q9BUP0	EFHD1	-0.518526	-0.223797	0.230263	-2.21704	0.026621	0.171043
O14936	CASK	-0.45671	-0.229686	0.204357	-2.21665	0.0266478	0.171043
P60891	PRPS1	-0.52242	-0.23051	0.182844	-2.21619	0.0266794	0.171043
Q9P1Y5	CAMSAP3	-0.452675	-0.283011	0.226721	-2.21522	0.0267456	0.171043
Q2M2I8	AAK1	-0.45799	-0.219036	0.228332	-2.21504	0.026758	0.171043
P84095	RHOG	-0.457007	-0.198006	0.183842	-2.21484	0.026772	0.171043
P23469	PTPRE	-0.482925	-0.187571	0.265051	-2.21469	0.0267824	0.171043
Q13613	MTMR1	-0.460847	-0.193962	0.255941	-2.21469	0.0267824	0.171043
Q8IYI6	EXOC8	-0.44526	-0.272454	0.13812	-2.21466	0.0267842	0.171043
P61927	RPL37	-0.467353	-0.257026	0.155494	-2.2137	0.0268505	0.171043
O75153	CLUH	-0.479385	-0.12265	0.175903	-2.21335	0.026874	0.171043
Q8WZA2	RAPGEF4	-0.450161	-0.291557	0.219926	-2.21298	0.0269001	0.171043
O95248	SBF1	-0.455887	-0.224511	0.197319	-2.21273	0.026917	0.171043
Q9Y2H5	PLEKHA6	-0.44378	-0.313344	0.165211	-2.21159	0.0269958	0.171043
Q6P1M0	SLC27A4	-0.456249	-0.235168	0.228543	-2.21155	0.0269983	0.171043
O60307	MAST3	-0.46082	-0.281123	0.194008	-2.21058	0.0270657	0.171043
Q9HBF4	ZFYVE1	-0.452849	-0.26947	0.222774	-2.20871	0.027196	0.171043
Q7KZF4	SND1	-0.459595	-0.194163	0.259904	-2.20855	0.0272066	0.171043
P50897	PPT1	-0.457363	-0.239849	0.266784	-2.20839	0.0272176	0.171043
O43301	HSPA12A	-0.448494	-0.279042	0.197511	-2.20839	0.0272177	0.171043
P04075	ALDOA	-0.457119	-0.217366	0.23736	-2.20759	0.0272738	0.171043
Q8N5V2	NGEF	-0.442288	-0.359136	0.163527	-2.20744	0.0272844	0.171043
Q13085	ACACA	-0.459151	-0.192178	0.244924	-2.20739	0.0272878	0.171043
P08133	ANXA6	-0.448679	-0.271362	0.192176	-2.20698	0.0273161	0.171043
Q5VWQ8	DAB2IP	-0.4788	-0.253532	0.272551	-2.2066	0.0273426	0.171043
Q9Y3A5	SBDS	-0.454306	-0.213334	0.175447	-2.20652	0.0273486	0.171043
Q13813	SPTAN1	-0.4543	-0.236557	0.205233	-2.20637	0.027359	0.171043
P11441	UBL4A	-0.443196	-0.293503	0.159765	-2.2057	0.0274059	0.171043
A5PKW4	PSD	-0.441729	-0.353142	0.157607	-2.20453	0.027488	0.171043
Q5T442	GJC2	-0.446946	-0.24208	0.14416	-2.20431	0.0275032	0.171043
Q9Y6G9	DYNC1LI1	-0.453257	-0.247732	0.20962	-2.20409	0.0275186	0.171043
A0AVT1	UBA6	-0.457378	-0.126466	0.218919	-2.20401	0.0275243	0.171043
P68371	TUBB4B	-0.455075	-0.200987	0.196482	-2.20338	0.0275691	0.171043
Q9BZ72	PITPNM2	-0.493903	-0.31085	0.255841	-2.20284	0.0276068	0.171043
P01009	SERPINA1	-0.449566	-0.243594	0.16514	-2.20262	0.0276225	0.171043
Q05397	PTK2	-0.501473	-0.23728	0.237671	-2.2026	0.0276238	0.171043
Q96PY5	FMNL2	-0.449292	-0.222827	0.147753	-2.20065	0.027762	0.171043
Q9UDT6	CLIP2	-0.449461	-0.247491	0.180286	-2.20056	0.0277679	0.171043
Q8N7J2	AMER2	-0.49541	-0.208028	0.196937	-2.20013	0.0277982	0.171043
Q9Y4F1	FARP1	-0.451363	-0.253706	0.206143	-2.19979	0.0278224	0.171043
Q9HBT6	CDH20	-0.480001	-0.20951	0.140371	-2.19854	0.0279115	0.171043
Q66K14	TBC1D9B	-0.447585	-0.2498	0.170773	-2.19854	0.0279117	0.171043
Q8N6N2	TTC9B	-0.451616	-0.276563	0.242851	-2.19731	0.0279995	0.171043
Q8TDJ6	DMXL2	-0.452726	-0.249228	0.235913	-2.19633	0.0280691	0.171043
P04350	TUBB4A	-0.451052	-0.240409	0.194698	-2.19568	0.028116	0.171043
Q14155	ARHGEF7	-0.4536	-0.226962	0.231928	-2.19552	0.028127	0.171043
O94967	WDR47	-0.45131	-0.245872	0.205587	-2.19531	0.028142	0.171043
Q7Z6Z7	HUWE1	-0.455887	-0.174819	0.218933	-2.19235	0.0283554	0.171043
Q13884	SNTB1	-0.452092	-0.204771	0.190031	-2.19148	0.0284182	0.171043
Q709C8	VPS13C	-0.452616	-0.189508	0.184895	-2.19076	0.0284697	0.171043
Q96RQ3	MCCC1	-0.455689	-0.133258	0.195562	-2.19054	0.0284858	0.171043
O94856	NFASC	-0.439869	-0.288118	0.149844	-2.19	0.0285249	0.171043
Q13049	TRIM32	-0.452681	-0.248863	0.255095	-2.18888	0.0286064	0.171043
P02675	FGB	-0.467768	-0.251139	0.172705	-2.18859	0.0286278	0.171043
Q13492	PICALM	-0.441947	-0.271645	0.162904	-2.18821	0.0286551	0.171043
Q9NSE4	IARS2	-0.454987	-0.158352	0.232704	-2.18789	0.0286783	0.171043
P09110	ACAA1	-0.470129	-0.247087	0.229091	-2.18782	0.0286837	0.171043
Q7Z3V4	UBE3B	-0.494969	-0.237912	0.241693	-2.18568	0.0288398	0.171043
Q9H6K4	OPA3	-0.454845	-0.2039	0.274242	-2.18566	0.0288415	0.171043
P47756	CAPZB	-0.454172	-0.20389	0.248452	-2.18552	0.0288514	0.171043
Q9UF11	PLEKHB1	-0.440837	-0.248319	0.138902	-2.18035	0.0292327	0.171043
Q9Y3D0	CIAO2B	-0.485614	-0.231009	0.206303	-2.18025	0.0292398	0.171043
P11586	MTHFD1	-0.452431	-0.187915	0.216466	-2.18019	0.0292439	0.171043
P49419	ALDH7A1	-0.437612	-0.289734	0.143009	-2.18015	0.0292471	0.171043
Q8WU79	SMAP2	-0.452974	-0.18124	0.272592	-2.18003	0.0292558	0.171043
P51157	RAB28	-0.489623	-0.309173	0.257433	-2.1799	0.0292659	0.171043
Q9BUF5	TUBB6	-0.450555	-0.214216	0.223196	-2.17883	0.0293454	0.171043
Q8NDH6	ICA1L	-0.491756	-0.275883	0.246354	-2.17795	0.0294107	0.171043
O95747	OXSR1	-0.440515	-0.287859	0.192059	-2.17717	0.0294685	0.171043
P47736	RAP1GAP	-0.450353	-0.212971	0.224106	-2.17715	0.02947	0.171043
Q86X10	RALGAPB	-0.447451	-0.24226	0.19976	-2.17705	0.0294774	0.171043
P49411	TUFM	-0.443994	-0.279738	0.215317	-2.17691	0.029488	0.171043
Q9Y5J5	PHLDA3	-0.460728	-0.241159	0.146641	-2.1769	0.0294889	0.171043
P02452	COL1A1	-0.436441	-0.417077	-0.0291234	-2.17639	0.0295268	0.171043
O15075	DCLK1	-0.441046	-0.274417	0.184982	-2.1751	0.0296234	0.171043
Q86VP3	PACS2	-0.448942	-0.242866	0.200454	-2.17465	0.0296573	0.171043
Q08AD1	CAMSAP2	-0.436223	-0.306203	0.141585	-2.17465	0.0296573	0.171043
P09874	PARP1	-0.435322	-0.329925	0.1009	-2.17432	0.0296821	0.171043
A7KAX9	ARHGAP32	-0.44839	-0.226189	0.217792	-2.17336	0.0297541	0.171043
Q99460	PSMD1	-0.449967	-0.20146	0.216514	-2.17331	0.0297576	0.171043
O14874	BCKDK	-0.440541	-0.331869	0.253531	-2.17155	0.0298905	0.171043
O43432	EIF4G3	-0.44758	-0.129636	0.282271	-2.17155	0.0298906	0.171043
Q96QG7	MTMR9	-0.438968	-0.273992	0.173225	-2.17016	0.0299954	0.171043
Q9BZC7	ABCA2	-0.435314	-0.288748	0.120462	-2.17008	0.0300015	0.171043
O94921	CDK14	-0.455215	-0.289311	0.160951	-2.17002	0.030006	0.171043
Q8NBL1	POGLUT1	-0.447641	-0.240253	0.222288	-2.16808	0.0301531	0.171043
Q9UM22	EPDR1	-0.449495	-0.174893	0.289978	-2.16799	0.0301602	0.171043
Q8NHG7	SVIP	-0.488546	-0.293234	0.260778	-2.16485	0.0304003	0.171043
Q00013	MPP1	-0.445154	-0.251429	0.218432	-2.16304	0.0305391	0.171043
Q9NY65	TUBA8	-0.437417	-0.261282	0.156653	-2.16277	0.0305597	0.171043
Q9BVA1	TUBB2B	-0.468828	-0.166347	0.205161	-2.16251	0.0305801	0.171043
P21926	CD9	-0.43411	-0.265366	0.114498	-2.16241	0.0305873	0.171043
Q9UN37	VPS4A	-0.433846	-0.307643	0.152222	-2.16239	0.0305892	0.171043
Q9Y4E6	WDR7	-0.444405	-0.259348	0.222241	-2.16183	0.0306323	0.171043
Q9Y3I0	RTCB	-0.448751	-0.184168	0.216096	-2.16123	0.0306784	0.171043
P01871	IGHM	-0.435644	-0.286817	0.131269	-2.15996	0.0307764	0.171043
Q16849	PTPRN	-0.447562	-0.25162	0.213943	-2.15988	0.030783	0.171043
Q5VWJ9	SNX30	-0.44444	-0.263922	0.233418	-2.15985	0.0307855	0.171043
Q86XE0	SNX32	-0.449259	-0.210775	0.292012	-2.15954	0.030809	0.171043
Q9NT62	ATG3	-0.448261	-0.17591	0.210001	-2.15786	0.0309392	0.171043
Q6ZV89	SH2D5	-0.436663	-0.300087	0.208265	-2.15775	0.030948	0.171043
P86790	CCZ1B	-0.44801	-0.200063	0.237633	-2.15729	0.0309838	0.171043
Q6U841	SLC4A10	-0.435114	-0.282339	0.173981	-2.1554	0.0311312	0.171043
P00367	GLUD1	-0.44473	-0.222234	0.214098	-2.15537	0.0311339	0.171043
Q92820	GGH	-0.470806	-0.242261	0.214574	-2.15512	0.0311537	0.171043
Q96FQ6	S100A16	-0.444257	-0.231283	0.21692	-2.15475	0.0311825	0.171043
P25098	GRK2	-0.433887	-0.293295	0.175268	-2.15447	0.0312042	0.171043
Q6UWR7	ENPP6	-0.437597	-0.217262	0.12087	-2.15425	0.0312211	0.171043
O95487	SEC24B	-0.501359	-0.203673	0.240445	-2.15297	0.031322	0.171071
Q9ULV4	CORO1C	-0.446492	-0.17229	0.279987	-2.15219	0.031383	0.171071
Q96JC1	VPS39	-0.446635	-0.164615	0.265196	-2.15195	0.031402	0.171071
Q4KMP7	TBC1D10B	-0.447488	-0.208957	0.269073	-2.15085	0.0314891	0.171225
P20591	MX1	-0.484523	-0.172823	0.240799	-2.14989	0.0315647	0.171318
Q9NUQ2	AGPAT5	-0.445425	-0.230334	0.267996	-2.14692	0.0318004	0.171794
Q9UPT5	EXOC7	-0.446371	-0.18197	0.226918	-2.14673	0.0318154	0.171794
Q8N122	RPTOR	-0.444044	-0.200135	0.208424	-2.14653	0.0318316	0.171794
Q96JN2	CCDC136	-0.431056	-0.27238	0.139699	-2.14357	0.0320683	0.171794
Q07954	LRP1	-0.442591	-0.236515	0.248015	-2.14119	0.0322595	0.171794
Q9BZV1	UBXN6	-0.437079	-0.267119	0.202851	-2.1411	0.0322666	0.171794
Q9UHD8	SEPTIN9	-0.438186	-0.282138	0.233249	-2.14002	0.0323541	0.171794
O95573	ACSL3	-0.428875	-0.323373	0.142901	-2.13898	0.0324385	0.171794
Q8N3P4	VPS8	-0.441589	-0.233243	0.233749	-2.13887	0.0324471	0.171794
Q9UFN0	NIPSNAP3A	-0.439216	-0.237563	0.193585	-2.1371	0.032591	0.171794
Q9ULB4	CDH9	-0.435172	-0.274639	0.20249	-2.13568	0.0327064	0.171794
Q5VZ66	JAKMIP3	-0.450045	-0.267193	0.202311	-2.13522	0.0327436	0.171794
Q8N0X7	SPART	-0.443964	-0.189434	0.237967	-2.13491	0.0327696	0.171794
Q00839	HNRNPU	-0.439408	-0.250246	0.229255	-2.1328	0.0329423	0.171794
Q01813	PFKP	-0.439947	-0.225624	0.218307	-2.1322	0.0329915	0.171794
P82650	MRPS22	-0.453254	-0.275125	0.203094	-2.13216	0.0329942	0.171794
Q15386	UBE3C	-0.443332	-0.206186	0.257291	-2.13212	0.0329976	0.171794
P42263	GRIA3	-0.427587	-0.344203	0.185214	-2.13178	0.0330258	0.171794
P49619	DGKG	-0.471275	-0.203857	0.237623	-2.13156	0.033044	0.171794
P62068	USP46	-0.462019	-0.242248	0.231396	-2.1314	0.0330571	0.171794
Q8TBX8	PIP4K2C	-0.439732	-0.227873	0.222383	-2.13092	0.033097	0.171794
P05165	PCCA	-0.429545	-0.297242	0.190015	-2.12897	0.0332579	0.171794
P07197	NEFM	-0.433294	-0.23945	0.156691	-2.12892	0.0332615	0.171794
Q6X4W1	NSMF	-0.437933	-0.245251	0.208205	-2.12892	0.033262	0.171794
Q14C86	GAPVD1	-0.438294	-0.229417	0.202593	-2.12747	0.0333821	0.171794
P54105	CLNS1A	-0.483637	-0.119049	0.160994	-2.1235	0.0337129	0.171794
Q9Y2I8	WDR37	-0.435283	-0.26644	0.218065	-2.12349	0.0337136	0.171794
Q9BTW9	TBCD	-0.439186	-0.182538	0.189068	-2.1223	0.0338137	0.171794
O00305	CACNB4	-0.437072	-0.237683	0.231905	-2.11856	0.0341284	0.171794
O00629	KPNA4	-0.476573	-0.0621377	0.234486	-2.11813	0.0341649	0.171794
P33402	GUCY1A2	-0.439962	-0.202998	0.212892	-2.11699	0.0342619	0.171794
Q52LD8	RFTN2	-0.438653	-0.195291	0.195953	-2.11631	0.0343192	0.171794
P40967	PMEL	-0.467352	-0.209078	0.18708	-2.11588	0.034356	0.171794
Q9NUU7	DDX19A	-0.436078	-0.225151	0.203389	-2.11587	0.0343566	0.171794
P12955	PEPD	-0.454171	-0.20893	0.169985	-2.11526	0.0344086	0.171794
Q9UDY2	TJP2	-0.435484	-0.183881	0.143082	-2.11426	0.0344943	0.171794
P98194	ATP2C1	-0.432523	-0.115222	0.329856	-2.11395	0.0345208	0.171794
Q12959	DLG1	-0.434779	-0.232084	0.191546	-2.11363	0.0345476	0.171794
Q9H0B6	KLC2	-0.438621	-0.164083	0.264746	-2.11338	0.0345693	0.171794
P24588	AKAP5	-0.434661	-0.250916	0.223879	-2.11087	0.034784	0.171794
Q9H4A3	WNK1	-0.479205	-0.248106	0.178973	-2.11079	0.034791	0.171794
P47914	RPL29	-0.466083	-0.319888	0.196961	-2.11032	0.0348317	0.171794
Q969N2	PIGT	-0.439611	-0.18383	0.265055	-2.10954	0.0348993	0.171794
Q9BT22	ALG1	-0.437603	-0.233969	0.272088	-2.10935	0.0349153	0.171794
O75390	CS	-0.434125	-0.228802	0.198485	-2.10784	0.0350457	0.171794
O14523	C2CD2L	-0.424008	-0.302421	0.180004	-2.10771	0.0350573	0.171794
Q9Y2Z4	YARS2	-0.432326	-0.26875	0.225335	-2.10686	0.0351306	0.171794
P19525	EIF2AK2	-0.425046	-0.291826	0.18315	-2.1067	0.0351447	0.171794
Q9Y6V0	PCLO	-0.4281	-0.283874	0.206317	-2.10656	0.0351565	0.171794
P49368	CCT3	-0.436773	-0.188483	0.21323	-2.10583	0.0352197	0.171794
O14976	GAK	-0.428364	-0.2642	0.185597	-2.10582	0.0352213	0.171794
Q96DM3	RMC1	-0.435448	-0.162935	0.29794	-2.1056	0.0352398	0.171794
Q6IQ26	DENND5A	-0.44631	-0.211154	0.171939	-2.10536	0.0352605	0.171794
P50995	ANXA11	-0.435468	-0.213395	0.226503	-2.10468	0.0353198	0.171794
Q13033	STRN3	-0.436678	-0.151587	0.252476	-2.10462	0.0353254	0.171794
Q5VUB5	FAM171A1	-0.422785	-0.301817	0.172858	-2.10343	0.0354294	0.171794
O43295	SRGAP3	-0.435817	-0.196682	0.218279	-2.1027	0.035493	0.171794
P20073	ANXA7	-0.421452	-0.299124	0.125418	-2.10134	0.035612	0.171794
P42858	HTT	-0.43624	-0.143596	0.227267	-2.09984	0.0357438	0.171794
Q9Y217	MTMR6	-0.431663	-0.256946	0.219966	-2.09956	0.0357688	0.171794
Q7L7X3	TAOK1	-0.426094	-0.0821503	0.347419	-2.09937	0.0357848	0.171794
P62333	PSMC6	-0.436361	-0.183701	0.227598	-2.09881	0.0358343	0.171794
O43815	STRN	-0.432481	-0.21498	0.188898	-2.09865	0.0358485	0.171794
Q99683	MAP3K5	-0.432492	-0.238579	0.223484	-2.09804	0.0359024	0.171794
Q01484	ANK2	-0.435323	-0.196907	0.228055	-2.09767	0.0359351	0.171794
P08670	VIM	-0.420275	-0.279169	0.0761954	-2.09671	0.0360205	0.171794
Q14161	GIT2	-0.472777	-0.255887	0.205235	-2.09577	0.0361037	0.171794
P29972	AQP1	-0.428156	-0.211907	0.119433	-2.09492	0.0361789	0.171794
P49588	AARS1	-0.435551	-0.133799	0.202537	-2.09453	0.0362137	0.171794
Q6WCQ1	MPRIP	-0.432756	-0.237475	0.199858	-2.09346	0.0363092	0.171794
Q6PJW8	CNST	-0.46066	-0.203737	0.252516	-2.09339	0.036315	0.171794
Q15555	MAPRE2	-0.422831	-0.272875	0.167421	-2.09228	0.0364144	0.171794
Q92552	MRPS27	-0.431646	-0.232721	0.225954	-2.09221	0.0364209	0.171794
Q6P1Q0	LETMD1	-0.419919	-0.307615	0.164394	-2.09215	0.036426	0.171794
Q9HCD6	TANC2	-0.41926	-0.320253	0.130935	-2.09144	0.0364896	0.171794
O75363	BCAS1	-0.43088	-0.197737	0.164137	-2.0913	0.036502	0.171794
Q9UHC6	CNTNAP2	-0.421324	-0.294936	0.18026	-2.0911	0.0365204	0.171794
O43707	ACTN4	-0.419048	-0.283047	0.0743112	-2.09101	0.0365281	0.171794
Q8IWA5	SLC44A2	-0.422479	-0.258344	0.151434	-2.08957	0.0366575	0.171794
O75521	ECI2	-0.432734	-0.220409	0.24346	-2.08916	0.036694	0.171794
O75689	ADAP1	-0.433811	-0.154439	0.2439	-2.08867	0.0367379	0.171794
Q5TF21	SOGA3	-0.432281	-0.187939	0.197158	-2.08857	0.036747	0.171794
Q5VIR6	VPS53	-0.430228	-0.215704	0.199145	-2.08636	0.0369466	0.171794
Q8TF30	WHAMM	-0.489479	-0.219053	0.287302	-2.0841	0.0371524	0.171794
Q7L5Y9	MAEA	-0.429496	-0.22801	0.212088	-2.08326	0.0372287	0.171794
Q96L34	MARK4	-0.419376	-0.302755	0.186631	-2.08259	0.0372897	0.171794
Q12879	GRIN2A	-0.424382	-0.279075	0.211335	-2.08247	0.0373001	0.171794
Q9H019	MTFR1L	-0.429114	-0.24402	0.224881	-2.08237	0.0373092	0.171794
Q9H425	C1orf198	-0.429289	-0.193361	0.170068	-2.08201	0.0373428	0.171794
Q00535	CDK5	-0.423047	-0.264384	0.181524	-2.08186	0.0373558	0.171794
P68104	EEF1A1	-0.429622	-0.212608	0.206838	-2.08115	0.0374215	0.171794
Q9NTX5	ECHDC1	-0.430385	-0.16379	0.167103	-2.07935	0.0375864	0.171794
P12036	NEFH	-0.420044	-0.241794	0.126472	-2.07932	0.0375892	0.171794
O15254	ACOX3	-0.46832	-0.276911	0.315705	-2.07926	0.0375948	0.171794
Q96JG6	VPS50	-0.42903	-0.216472	0.207233	-2.07921	0.0375991	0.171794
Q96PE5	OPALIN	-0.416108	-0.303338	0.0549739	-2.07887	0.0376306	0.171794
P40222	TXLNA	-0.469225	-0.230043	0.255771	-2.07884	0.0376328	0.171794
Q71UI9	H2AZ2	-0.426115	-0.219632	0.15307	-2.07606	0.0378889	0.171794
P53779	MAPK10	-0.427562	-0.218096	0.187622	-2.07551	0.0379401	0.171794
P35270	SPR	-0.44682	-0.217475	0.198698	-2.07389	0.0380904	0.171794
Q9Y2D4	EXOC6B	-0.430604	-0.14819	0.238746	-2.0737	0.0381079	0.171794
O43318	MAP3K7	-0.440991	-0.246998	0.21982	-2.07366	0.0381119	0.171794
Q9BUK6	MSTO1	-0.434254	-0.14176	0.261835	-2.07358	0.0381189	0.171794
P17858	PFKL	-0.427878	-0.2093	0.203964	-2.07239	0.0382297	0.171794
Q96A65	EXOC4	-0.429646	-0.189672	0.215912	-2.07115	0.0383456	0.171794
Q8WV93	AFG1L	-0.457397	-0.279214	0.203742	-2.06981	0.0384712	0.171794
Q9UBM7	DHCR7	-0.43033	-0.128178	0.196548	-2.06959	0.0384921	0.171794
Q9P260	RELCH	-0.422847	-0.22607	0.156139	-2.06876	0.0385692	0.171794
Q9H4B0	OSGEPL1	-0.430477	-0.153363	0.211746	-2.06854	0.0385907	0.171794
P17980	PSMC3	-0.427317	-0.203673	0.203118	-2.06821	0.0386214	0.171794
Q7L1V2	MON1B	-0.481826	-0.237488	0.210405	-2.06677	0.0387572	0.171794
Q53GQ0	HSD17B12	-0.422203	-0.234622	0.166157	-2.066	0.0388291	0.171794
O75382	TRIM3	-0.424815	-0.241713	0.203497	-2.06525	0.0389005	0.171794
Q02410	APBA1	-0.428956	-0.163702	0.19448	-2.06498	0.0389263	0.171794
Q9Y263	PLAA	-0.429642	-0.173334	0.229506	-2.06474	0.0389485	0.171794
Q5VYK3	ECPAS	-0.426259	-0.197429	0.178801	-2.06371	0.0390458	0.171794
Q9NQR7	CCDC177	-0.415322	-0.323639	0.210742	-2.06316	0.0390984	0.171794
Q15049	MLC1	-0.42886	-0.191381	0.240494	-2.06226	0.0391838	0.171794
Q9Y2G0	EFR3B	-0.425609	-0.229678	0.227341	-2.06192	0.039216	0.171794
Q86VN1	VPS36	-0.454324	-0.207265	0.252071	-2.06136	0.0392699	0.171794
Q8NFP9	NBEA	-0.414756	-0.276918	0.150219	-2.06097	0.0393066	0.171794
Q16566	CAMK4	-0.412971	-0.335406	0.168803	-2.05915	0.0394808	0.171794
Q9NWV8	BABAM1	-0.414282	-0.303265	0.18461	-2.05818	0.0395742	0.171794
O95741	CPNE6	-0.42519	-0.211649	0.212323	-2.0581	0.0395814	0.171794
Q5VT66	MTARC1	-0.434977	-0.222272	0.198146	-2.05805	0.0395861	0.171794
Q674X7	KAZN	-0.411765	-0.349087	0.11765	-2.05696	0.0396907	0.171794
Q8IVF5	TIAM2	-0.427637	-0.160951	0.239353	-2.05688	0.0396984	0.171794
Q9P0L2	MARK1	-0.42035	-0.254848	0.192476	-2.05643	0.0397416	0.171794
Q8NCB2	CAMKV	-0.420477	-0.280686	0.22653	-2.05618	0.0397661	0.171794
P05091	ALDH2	-0.425023	-0.218261	0.232408	-2.05426	0.0399516	0.171794
Q09666	AHNAK	-0.416798	-0.231329	0.133983	-2.05408	0.0399685	0.171794
Q92499	DDX1	-0.423506	-0.202855	0.181759	-2.054	0.0399767	0.171794
O43427	FIBP	-0.426899	-0.196025	0.242123	-2.05349	0.0400264	0.171794
P31153	MAT2A	-0.420228	-0.0678094	0.266592	-2.05295	0.0400786	0.171794
Q9BR61	ACBD6	-0.439038	-0.300519	0.179588	-2.05233	0.0401389	0.171794
Q16653	MOG	-0.421628	-0.207337	0.154447	-2.05197	0.0401737	0.171794
O96028	NSD2	-0.441212	-0.214895	0.202621	-2.05091	0.0402768	0.171794
Q9GZV7	HAPLN2	-0.422301	-0.18546	0.154703	-2.04888	0.040475	0.171794
Q9P2R3	ANKFY1	-0.423213	-0.177016	0.168356	-2.04865	0.0404975	0.171794
Q14642	INPP5A	-0.4106	-0.298841	0.140505	-2.04655	0.0407029	0.171794
P60033	CD81	-0.412733	-0.252843	0.132764	-2.04627	0.0407308	0.171794
Q9HAU5	UPF2	-0.453356	-0.0877923	0.211453	-2.04603	0.0407545	0.171794
P42167	TMPO	-0.417333	-0.283718	0.146969	-2.04544	0.0408129	0.171794
Q9UKU7	ACAD8	-0.457826	-0.283271	0.247725	-2.04502	0.0408539	0.171794
P13051	UNG	-0.468572	-0.205579	0.247786	-2.04445	0.0409103	0.171794
Q9P0V3	SH3BP4	-0.439293	-0.235593	0.19772	-2.04399	0.0409555	0.171794
Q6ZVM7	TOM1L2	-0.422951	-0.110927	0.227746	-2.04392	0.0409626	0.171794
O14787	TNPO2	-0.424978	-0.171221	0.219008	-2.04304	0.0410495	0.171794
P34896	SHMT1	-0.466667	-0.162681	0.251629	-2.04234	0.0411184	0.171794
Q92623	TTC9	-0.421907	-0.219859	0.222561	-2.04223	0.0411299	0.171794
O76024	WFS1	-0.424904	-0.181979	0.252994	-2.04219	0.0411339	0.171794
P00918	CA2	-0.410588	-0.221001	0.0740273	-2.04208	0.0411444	0.171794
O15530	PDPK1	-0.424735	-0.174808	0.223456	-2.04188	0.0411641	0.171794
Q8IWW6	ARHGAP12	-0.412895	-0.246447	0.138739	-2.04122	0.0412295	0.171794
P07947	YES1	-0.446159	-0.226631	0.184299	-2.04047	0.0413048	0.171794
Q9UNA1	ARHGAP26	-0.419395	-0.235604	0.191737	-2.04043	0.0413087	0.171794
Q13574	DGKZ	-0.4348	-0.282735	0.200045	-2.04037	0.0413149	0.171794
O94874	UFL1	-0.422886	-0.200592	0.223353	-2.04027	0.0413247	0.171794
P50416	CPT1A	-0.419656	-0.242836	0.206988	-2.03939	0.0414124	0.171794
Q99250	SCN2A	-0.423051	-0.194081	0.224101	-2.03865	0.0414863	0.171794
P46459	NSF	-0.417827	-0.264647	0.218254	-2.03714	0.0416369	0.171794
A2RRP1	NBAS	-0.420449	-0.214345	0.210379	-2.03639	0.041712	0.171794
Q8NBQ5	HSD17B11	-0.471796	-0.220223	0.256036	-2.0362	0.0417309	0.171794
Q14CZ8	HEPACAM	-0.41756	-0.228544	0.172607	-2.036	0.0417512	0.171794
Q7Z3C6	ATG9A	-0.423301	-0.161447	0.203647	-2.03542	0.0418092	0.171794
Q99832	CCT7	-0.421518	-0.18446	0.200283	-2.03446	0.0419057	0.171794
Q96AX1	VPS33A	-0.423638	-0.162633	0.253813	-2.0344	0.0419122	0.171794
P40939	HADHA	-0.423018	-0.20407	0.261395	-2.03345	0.0420077	0.171794
P00533	EGFR	-0.420366	-0.182959	0.185311	-2.03248	0.0421061	0.171794
Q15388	TOMM20	-0.415619	-0.286851	0.235352	-2.03184	0.0421705	0.171794
P36507	MAP2K2	-0.42143	-0.153666	0.25605	-2.0313	0.042226	0.171794
Q13554	CAMK2B	-0.418151	-0.237856	0.204239	-2.03127	0.0422289	0.171794
Q8WUH2	TGFBRAP1	-0.41333	-0.249638	0.169441	-2.03085	0.0422708	0.171794
Q9BZ71	PITPNM3	-0.418336	-0.234144	0.212027	-2.03013	0.0423439	0.171794
O43813	LANCL1	-0.422335	-0.159312	0.225812	-2.02996	0.0423614	0.171794
P55060	CSE1L	-0.412674	-0.204526	0.108258	-2.02989	0.0423689	0.171794
P30626	SRI	-0.417979	-0.222678	0.202492	-2.02777	0.0425848	0.171794
Q9Y2W6	TDRKH	-0.434418	-0.255185	0.18684	-2.02762	0.0426002	0.171794
P49841	GSK3B	-0.408274	-0.2932	0.174949	-2.02735	0.0426274	0.171794
Q08462	ADCY2	-0.414266	-0.250242	0.186328	-2.02687	0.042677	0.171794
O94991	SLITRK5	-0.44262	-0.263455	0.224598	-2.02649	0.0427159	0.171794
Q13190	STX5	-0.417515	-0.214006	0.191537	-2.02553	0.0428139	0.171794
P46734	MAP2K3	-0.443301	-0.243123	0.219526	-2.02418	0.0429524	0.171794
P50990	CCT8	-0.417579	-0.204143	0.190393	-2.02396	0.0429749	0.171794
P08240	SRPRA	-0.451649	-0.315294	0.223425	-2.02396	0.0429749	0.171794
Q8N5C8	TAB3	-0.436623	-0.288165	0.219757	-2.0232	0.0430533	0.171794
P35222	CTNNB1	-0.41488	-0.229799	0.17414	-2.02295	0.043079	0.171794
P16298	PPP3CB	-0.425837	-0.230764	0.250234	-2.02138	0.0432414	0.171794
P60842	EIF4A1	-0.416175	-0.212072	0.135397	-2.02021	0.0433621	0.171794
O60331	PIP5K1C	-0.411823	-0.273915	0.206315	-2.02008	0.0433764	0.171794
Q8N2K0	ABHD12	-0.417343	-0.231859	0.237917	-2.02007	0.0433775	0.171794
Q9NUQ7	UFSP2	-0.441042	-0.144007	0.233699	-2.01994	0.0433909	0.171794
P63010	AP2B1	-0.416619	-0.232852	0.223032	-2.01993	0.0433912	0.171794
Q92506	HSD17B8	-0.428731	-0.275653	0.176738	-2.01877	0.0435124	0.171794
Q9UL51	HCN2	-0.42533	-0.158485	0.213829	-2.01844	0.0435461	0.171794
P35908	KRT2	-0.406501	-0.28927	0.172776	-2.01765	0.043629	0.171794
P51649	ALDH5A1	-0.407712	-0.283313	0.18186	-2.01691	0.0437055	0.171794
P55735	SEC13	-0.41144	-0.240189	0.167889	-2.01612	0.0437882	0.171794
Q8N6T3	ARFGAP1	-0.409217	-0.261852	0.173687	-2.01609	0.0437916	0.171794
Q9NR19	ACSS2	-0.470546	-0.141788	0.230098	-2.01569	0.0438338	0.171794
O00213	APBB1	-0.415215	-0.231685	0.208969	-2.01498	0.0439075	0.171794
P08237	PFKM	-0.416228	-0.201217	0.198401	-2.01491	0.0439146	0.171794
Q9NSD9	FARSB	-0.416595	-0.243474	0.259016	-2.01484	0.0439228	0.171794
Q13491	GPM6B	-0.414751	-0.227881	0.18381	-2.01466	0.0439417	0.171794
Q4G176	ACSF3	-0.413603	-0.239432	0.192006	-2.01394	0.044017	0.171794
Q7L2E3	DHX30	-0.413424	-0.261128	0.219148	-2.01311	0.0441039	0.171794
P42679	MATK	-0.434572	-0.201508	0.217363	-2.01242	0.044177	0.171794
Q9ULD0	OGDHL	-0.418429	-0.190962	0.275733	-2.0124	0.0441784	0.171794
Q5THJ4	VPS13D	-0.431026	-0.330151	0.190936	-2.01173	0.0442492	0.171794
P23258	TUBG1	-0.451362	-0.226909	0.256583	-2.01142	0.0442824	0.171794
P60660	MYL6	-0.414922	-0.215771	0.210594	-2.00998	0.0444338	0.171794
P40855	PEX19	-0.414319	-0.204384	0.187339	-2.00878	0.0445617	0.171794
Q7RTV0	PHF5A	-0.473271	-0.222688	0.170777	-2.00866	0.0445742	0.171794
P82663	MRPS25	-0.407576	-0.291496	0.211043	-2.00794	0.0446505	0.171794
Q8N163	CCAR2	-0.41985	-0.236585	0.229517	-2.00788	0.044657	0.171794
Q96DB2	HDAC11	-0.411659	-0.216966	0.157295	-2.0076	0.0446867	0.171794
P17252	PRKCA	-0.416253	-0.199398	0.22505	-2.0074	0.0447084	0.171794
P36578	RPL4	-0.407577	-0.273538	0.191056	-2.00669	0.0447832	0.171794
Q7LG56	RRM2B	-0.414941	-0.178027	0.180978	-2.00577	0.044882	0.171794
Q9H329	EPB41L4B	-0.401362	-0.372183	0.138133	-2.00531	0.044931	0.171794
Q9BZE1	MRPL37	-0.46744	-0.287288	0.231404	-2.00495	0.0449696	0.171794
Q9Y676	MRPS18B	-0.410377	-0.256187	0.191095	-2.00488	0.0449769	0.171794
Q3KQU3	MAP7D1	-0.400916	-0.370185	0.0744565	-2.00403	0.0450676	0.171794
P00338	LDHA	-0.407618	-0.265738	0.187353	-2.00391	0.0450803	0.171794
Q8IWQ3	BRSK2	-0.412971	-0.228935	0.208729	-2.00368	0.045105	0.171794
Q08AM6	VAC14	-0.416496	-0.165483	0.220959	-2.00153	0.0453368	0.171794
Q96PE3	INPP4A	-0.416061	-0.150068	0.185169	-2.00121	0.0453712	0.171794
Q96P53	WDFY2	-0.425749	-0.204957	0.17989	-2.00103	0.0453898	0.171794
Q13200	PSMD2	-0.415937	-0.161872	0.238347	-2.00029	0.0454699	0.171794
P26232	CTNNA2	-0.410462	-0.221305	0.170016	-1.99835	0.0456801	0.171794
Q9Y3F4	STRAP	-0.412467	-0.195386	0.186013	-1.99786	0.0457323	0.171794
Q9ULH1	ASAP1	-0.413436	-0.19524	0.20573	-1.99768	0.0457525	0.171794
P42356	PI4KA	-0.411676	-0.221052	0.196826	-1.99766	0.045755	0.171794
O75569	PRKRA	-0.43149	-0.197809	0.216418	-1.99712	0.045813	0.171794
Q8TEA7	TBCK	-0.444385	-0.172354	0.255935	-1.99664	0.0458649	0.171794
Q92616	GCN1	-0.414967	-0.184634	0.203001	-1.99654	0.0458766	0.171794
Q13724	MOGS	-0.415417	-0.203043	0.267847	-1.99635	0.045897	0.171794
Q9Y4P3	TBL2	-0.406317	-0.276031	0.202808	-1.99628	0.0459041	0.171794
Q15120	PDK3	-0.413399	-0.226668	0.2497	-1.99626	0.0459064	0.171794
Q96FN4	CPNE2	-0.399599	-0.292651	0.0646099	-1.99535	0.0460061	0.171794
Q9NUJ3	TCP11L1	-0.400437	-0.310748	0.166865	-1.99527	0.0460141	0.171794
Q96DZ5	CLIP3	-0.431681	-0.226471	0.229669	-1.99491	0.0460539	0.171794
Q15052	ARHGEF6	-0.454841	-0.223496	0.255846	-1.99407	0.0461455	0.171794
Q96L92	SNX27	-0.411541	-0.194557	0.182515	-1.99394	0.0461601	0.171794
O76071	CIAO1	-0.442494	-0.192705	0.240361	-1.99386	0.0461683	0.171794
Q9NX05	FAM120C	-0.428729	-0.175889	0.148578	-1.99383	0.0461712	0.171794
Q14457	BECN1	-0.400097	-0.257325	0.111387	-1.99194	0.0463791	0.171794
O60299	LZTS3	-0.402189	-0.276438	0.167932	-1.99176	0.0463988	0.171794
Q8WXS3	BAALC	-0.430032	-0.215941	0.106126	-1.99089	0.0464943	0.171794
Q99816	TSG101	-0.409838	-0.222571	0.18516	-1.99087	0.0464966	0.171794
Q86TV6	TTC7B	-0.411297	-0.194404	0.193962	-1.9901	0.0465806	0.171794
Q9Y224	RTRAF	-0.407681	-0.220635	0.159624	-1.98929	0.0466703	0.171794
Q9Y678	COPG1	-0.413421	-0.175906	0.214533	-1.98916	0.0466842	0.171794
Q92854	SEMA4D	-0.405707	-0.230756	0.154155	-1.98902	0.0467	0.171794
Q8TCG5	CPT1C	-0.413688	-0.194929	0.248145	-1.98885	0.0467186	0.171794
Q7L804	RAB11FIP2	-0.434925	-0.330868	0.198064	-1.98857	0.0467501	0.171794
Q6ZSY5	PPP1R3F	-0.447758	-0.284432	0.199838	-1.98819	0.0467918	0.171794
O15484	CAPN5	-0.399194	-0.302093	0.165726	-1.98783	0.0468314	0.171794
Q00341	HDLBP	-0.403672	-0.257714	0.173472	-1.98636	0.0469944	0.172175
Q147X3	NAA30	-0.409442	-0.103968	0.2452	-1.98529	0.0471132	0.172179
Q8TDN4	CABLES1	-0.432502	-0.189805	0.225467	-1.98505	0.0471402	0.172179
P06748	NPM1	-0.402089	-0.254626	0.156232	-1.98473	0.0471757	0.172179
Q9BYN8	MRPS26	-0.43759	-0.277487	0.179567	-1.98403	0.0472533	0.172179
Q96KG9	SCYL1	-0.411772	-0.136243	0.224843	-1.98319	0.047347	0.172179
Q8N414	PGBD5	-0.402199	-0.27704	0.191336	-1.98215	0.0474635	0.172179
Q8N145	LGI3	-0.397752	-0.259189	0.100157	-1.98207	0.0474725	0.172179
P63167	DYNLL1	-0.409376	-0.190645	0.18515	-1.98174	0.0475096	0.172179
Q9UBF2	COPG2	-0.43509	-0.182961	0.199765	-1.98146	0.0475405	0.172179
Q96P70	IPO9	-0.412124	-0.1476	0.212733	-1.98104	0.0475877	0.172179
P15056	BRAF	-0.408392	-0.233041	0.222007	-1.98028	0.0476736	0.172179
Q9NP92	MRPS30	-0.429042	-0.285225	0.241297	-1.97984	0.0477219	0.172179
P63279	UBE2I	-0.454815	-0.186476	0.205899	-1.97874	0.0478461	0.172179
Q86VU5	COMTD1	-0.410877	-0.188676	0.28963	-1.97871	0.0478497	0.172179
Q13009	TIAM1	-0.44492	-0.209921	0.248258	-1.97784	0.0479475	0.172179
P53007	SLC25A1	-0.402966	-0.259343	0.186037	-1.97766	0.0479682	0.172179
P07196	NEFL	-0.397946	-0.250242	0.117341	-1.97725	0.0480148	0.172179
P22830	FECH	-0.407192	-0.213421	0.18239	-1.97652	0.0480971	0.172179
Q9P0J7	KCMF1	-0.406503	-0.205748	0.157982	-1.97635	0.0481157	0.172179
Q9Y342	PLLP	-0.39918	-0.254907	0.0965593	-1.97376	0.0484105	0.172454
Q96JB5	CDK5RAP3	-0.400042	-0.23632	0.136839	-1.97302	0.0484938	0.172454
Q9H2X9	SLC12A5	-0.407642	-0.218672	0.222816	-1.97279	0.0485209	0.172454
Q03252	LMNB2	-0.395526	-0.297672	0.112986	-1.97254	0.048549	0.172454
Q13619	CUL4A	-0.410323	-0.147291	0.207877	-1.97196	0.0486156	0.172454
Q8WVM8	SCFD1	-0.39951	-0.00874905	0.2674	-1.97191	0.0486208	0.172454
Q9UQF2	MAPK8IP1	-0.433915	-0.201016	0.23319	-1.97145	0.0486731	0.172454
Q96RT1	ERBIN	-0.428317	-0.179721	0.191766	-1.97116	0.0487063	0.172454
Q66K74	MAP1S	-0.402983	-0.237307	0.171356	-1.97101	0.0487242	0.172454
Q15366	PCBP2	-0.40884	-0.151374	0.249713	-1.97004	0.0488351	0.172553
O43307	ARHGEF9	-0.408424	-0.25128	0.200637	-1.96921	0.0489297	0.172553
P27635	RPL10	-0.399048	-0.272586	0.180558	-1.96892	0.0489628	0.172553
Q15438	CYTH1	-0.406546	-0.231225	0.204697	-1.9683	0.049034	0.172553
P30086	PEBP1	-0.396397	-0.227556	0.093135	-1.96819	0.0490476	0.172553
Q9Y2A7	NCKAP1	-0.405463	-0.2213	0.204463	-1.96657	0.0492335	0.172999
Q9NRZ5	AGPAT4	-0.446613	-0.175536	0.204181	-1.96595	0.0493055	0.173044
A8MVW0	FAM171A2	-0.408724	-0.197792	0.273024	-1.96444	0.0494804	0.173113
Q06830	PRDX1	-0.399733	-0.228895	0.14384	-1.96384	0.0495501	0.173113
Q9H936	SLC25A22	-0.398207	-0.279172	0.191382	-1.96364	0.0495728	0.173113
O94759	TRPM2	-0.407413	-0.236612	0.18846	-1.96356	0.0495824	0.173113
P46779	RPL28	-0.394551	-0.297426	0.166265	-1.96322	0.0496217	0.173113
O15269	SPTLC1	-0.403642	-0.22733	0.186821	-1.96182	0.0497847	0.173298
Q9Y4D1	DAAM1	-0.406547	-0.203437	0.227377	-1.96131	0.0498434	0.173298
Q9NVK5	FGFR1OP2	-0.42222	-0.210773	0.184221	-1.96044	0.0499449	0.173298
Q9Y4P8	WIPI2	-0.406672	-0.202687	0.232313	-1.96038	0.0499521	0.173298
Q92633	LPAR1	-0.443123	-0.237648	0.139723	-1.95991	0.0500077	0.173298
Q15878	CACNA1E	-0.402115	-0.244743	0.195036	-1.95971	0.0500311	0.173298
O00139	KIF2A	-0.407596	-0.160816	0.228564	-1.9592	0.0500904	0.173298
P18206	VCL	-0.393072	-0.224173	0.0721008	-1.9564	0.0504193	0.173969
P22102	GART	-0.405703	-0.147853	0.163274	-1.95577	0.0504937	0.173969
O94830	DDHD2	-0.392186	-0.263556	0.0801095	-1.95545	0.0505313	0.173969
P17987	TCP1	-0.406248	-0.1683	0.204249	-1.95481	0.0506071	0.173969
P13591	NCAM1	-0.391897	-0.291213	0.11288	-1.95409	0.0506916	0.173969
P48426	PIP4K2A	-0.406496	-0.140411	0.18205	-1.95395	0.0507078	0.173969
P02462	COL4A1	-0.432433	-0.208394	0.134206	-1.95367	0.0507417	0.173969
P02689	PMP2	-0.402137	-0.168542	0.127189	-1.95183	0.0509591	0.173969
Q13367	AP3B2	-0.404692	-0.138088	0.242501	-1.95166	0.0509794	0.173969
P63096	GNAI1	-0.396222	-0.244565	0.154821	-1.95073	0.0510908	0.173969
Q04637	EIF4G1	-0.403723	-0.121795	0.238457	-1.95033	0.0511374	0.173969
Q8IXJ6	SIRT2	-0.393886	-0.221366	0.100899	-1.9498	0.0512007	0.173969
Q9UL25	RAB21	-0.397856	-0.230312	0.156076	-1.94926	0.0512659	0.173969
Q02218	OGDH	-0.405537	-0.198891	0.256534	-1.94919	0.0512732	0.173969
O94910	ADGRL1	-0.39211	-0.288066	0.162762	-1.9489	0.0513082	0.173969
A0JNW5	UHRF1BP1L	-0.433702	-0.276956	0.197662	-1.9488	0.0513201	0.173969
Q6VY07	PACS1	-0.394604	-0.271492	0.175159	-1.94877	0.0513242	0.173969
Q9UDY4	DNAJB4	-0.400083	-0.250303	0.205802	-1.94803	0.0514122	0.173969
P28288	ABCD3	-0.399403	-0.244952	0.192064	-1.948	0.0514162	0.173969
Q12905	ILF2	-0.41801	-0.214502	0.177957	-1.94667	0.0515748	0.174091
P61758	VBP1	-0.403336	-0.168506	0.181707	-1.94631	0.051618	0.174091
Q9HAR2	ADGRL3	-0.400077	-0.239536	0.197332	-1.94621	0.0516311	0.174091
P20916	MAG	-0.397157	-0.20016	0.119781	-1.94504	0.0517716	0.174195
Q5R3F8	ELFN2	-0.417977	-0.239463	0.195203	-1.94496	0.0517812	0.174195
Q71U36	TUBA1A	-0.401141	-0.169986	0.148736	-1.94408	0.0518872	0.174206
Q9BRX2	PELO	-0.449761	-0.199657	0.232107	-1.94394	0.0519038	0.174206
Q9NRF2	SH2B1	-0.426872	-0.209036	0.214179	-1.94249	0.0520793	0.174594
O95352	ATG7	-0.422545	-0.129857	0.222935	-1.94127	0.0522271	0.174889
Q9BZF1	OSBPL8	-0.390904	-0.287454	0.170402	-1.94026	0.052349	0.175096
Q9UQ13	SHOC2	-0.399359	-0.21521	0.174439	-1.93748	0.052688	0.175462
Q9Y3A3	MOB4	-0.398857	-0.209241	0.169642	-1.93732	0.0527075	0.175462
Q9UPU5	USP24	-0.416683	-0.0650863	0.19368	-1.93707	0.0527384	0.175462
O15394	NCAM2	-0.388897	-0.287829	0.145904	-1.93679	0.0527714	0.175462
Q6P2E9	EDC4	-0.409387	-0.273484	0.221693	-1.93646	0.0528118	0.175462
A0FGR8	ESYT2	-0.402304	-0.178824	0.216578	-1.93601	0.052867	0.175462
O60669	SLC16A7	-0.416519	-0.233709	0.186911	-1.93527	0.0529578	0.175462
Q9H0F7	ARL6	-0.388362	-0.279103	0.126047	-1.93523	0.0529626	0.175462
Q8NE62	CHDH	-0.402372	-0.142202	0.18206	-1.93444	0.0530603	0.175462
Q9Y3E5	PTRH2	-0.400268	-0.20455	0.216563	-1.93427	0.0530814	0.175462
P55087	AQP4	-0.401198	-0.194706	0.226091	-1.93303	0.0532331	0.175462
O95831	AIFM1	-0.397732	-0.235078	0.199149	-1.93234	0.053318	0.175462
Q9P2P5	HECW2	-0.396542	-0.237331	0.186412	-1.93223	0.0533319	0.175462
Q13596	SNX1	-0.398584	-0.0951104	0.23212	-1.93216	0.0533403	0.175462
P36969	GPX4	-0.398076	-0.214844	0.19429	-1.93101	0.0534826	0.175462
Q96PU8	QKI	-0.399533	-0.152413	0.155709	-1.92951	0.0536683	0.175462
Q6PCB7	SLC27A1	-0.398347	-0.186832	0.175101	-1.92951	0.0536692	0.175462
Q14203	DCTN1	-0.399339	-0.0958997	0.202396	-1.92837	0.0538106	0.175462
P62834	RAP1A	-0.399605	-0.266235	0.125348	-1.92832	0.0538164	0.175462
Q01968	OCRL	-0.397484	-0.111625	0.273676	-1.92811	0.0538419	0.175462
Q16555	DPYSL2	-0.400832	-0.162545	0.20076	-1.92796	0.0538607	0.175462
P35527	KRT9	-0.386784	-0.284071	0.132465	-1.92736	0.053936	0.175462
Q9Y698	CACNG2	-0.39163	-0.266344	0.160229	-1.92712	0.0539658	0.175462
Q05586	GRIN1	-0.386671	-0.311956	0.161733	-1.92707	0.0539722	0.175462
Q15048	LRRC14	-0.399675	-0.195105	0.222066	-1.92684	0.0540007	0.175462
P06241	FYN	-0.397146	-0.210322	0.187185	-1.92668	0.0540208	0.175462
Q9Y6T7	DGKB	-0.390293	-0.27046	0.179689	-1.92495	0.0542369	0.175969
O60763	USO1	-0.39691	-0.0802929	0.213485	-1.92404	0.0543505	0.176141
O75970	MPDZ	-0.437591	-0.234235	0.212184	-1.918	0.0551125	0.177478
Q15418	RPS6KA1	-0.397864	-0.152669	0.172217	-1.91725	0.0552074	0.177478
P23919	DTYMK	-0.435755	-0.136478	0.242909	-1.91706	0.055231	0.177478
O43264	ZW10	-0.446378	-0.207426	0.224539	-1.91697	0.0552431	0.177478
Q8WXA3	RUFY2	-0.411833	-0.239352	0.189851	-1.91521	0.0554672	0.177478
P18031	PTPN1	-0.429242	-0.230527	0.189596	-1.9151	0.0554806	0.177478
P60953	CDC42	-0.396144	-0.187604	0.192615	-1.915	0.0554933	0.177478
Q1L5Z9	LONRF2	-0.42848	-0.288546	0.220376	-1.91439	0.0555712	0.177478
Q9UPV7	PHF24	-0.388752	-0.233265	0.139975	-1.91425	0.0555888	0.177478
Q08211	DHX9	-0.405466	-0.186029	0.212675	-1.91392	0.055632	0.177478
Q16181	SEPTIN7	-0.388491	-0.270212	0.185979	-1.91315	0.0557302	0.177478
Q562E7	WDR81	-0.431456	-0.161793	0.235606	-1.91297	0.0557529	0.177478
O00555	CACNA1A	-0.417474	-0.227807	0.210731	-1.91293	0.0557582	0.177478
Q9NZV8	KCND2	-0.415764	-0.172011	0.223834	-1.9121	0.0558642	0.177478
O96008	TOMM40	-0.384149	-0.291107	0.161316	-1.91075	0.0560373	0.177478
Q96C36	PYCR2	-0.441447	-0.288997	0.208264	-1.90997	0.0561383	0.177478
O43237	DYNC1LI2	-0.396481	-0.174083	0.201554	-1.90997	0.0561385	0.177478
Q9ULB1	NRXN1	-0.396315	-0.199882	0.237261	-1.9084	0.0563412	0.177478
P62140	PPP1CB	-0.397116	-0.144878	0.195686	-1.90838	0.0563432	0.177478
Q8NCA5	FAM98A	-0.396069	-0.168051	0.193508	-1.9081	0.0563791	0.177478
Q9P265	DIP2B	-0.393649	-0.214282	0.203909	-1.90784	0.0564124	0.177478
Q02252	ALDH6A1	-0.389979	-0.0370321	0.2353	-1.90682	0.0565455	0.177478
P11182	DBT	-0.391613	-0.248892	0.204371	-1.90667	0.0565639	0.177478
Q13555	CAMK2G	-0.394507	-0.202857	0.213823	-1.90658	0.0565765	0.177478
O14639	ABLIM1	-0.382959	-0.26719	0.12436	-1.90647	0.0565898	0.177478
O43741	PRKAB2	-0.409299	-0.215382	0.18213	-1.90571	0.0566894	0.177478
P50336	PPOX	-0.432921	-0.125107	0.253385	-1.90522	0.0567528	0.177478
O14980	XPO1	-0.394468	-0.159592	0.16411	-1.90522	0.0567531	0.177478
O75534	CSDE1	-0.393288	-0.213331	0.207412	-1.90521	0.0567536	0.177478
P63208	SKP1	-0.382003	-0.304105	0.119657	-1.90516	0.05676	0.177478
P02686	MBP	-0.384617	-0.21358	0.0889671	-1.90476	0.0568127	0.177478
P67775	PPP2CA	-0.390971	-0.0675909	0.240284	-1.90461	0.0568315	0.177478
Q99719	SEPTIN5	-0.393212	-0.244275	0.248443	-1.90437	0.0568637	0.177478
Q96CM8	ACSF2	-0.395748	-0.125953	0.199179	-1.90403	0.0569076	0.177478
Q8N2F6	ARMC10	-0.382803	-0.28952	0.160631	-1.90375	0.0569436	0.177478
Q76NI1	KNDC1	-0.391544	-0.242237	0.205612	-1.90299	0.0570429	0.177478
P54136	RARS1	-0.395831	-0.152778	0.196122	-1.90289	0.0570565	0.177478
P10586	PTPRF	-0.389353	-0.247101	0.188965	-1.90168	0.057214	0.177478
Q9Y295	DRG1	-0.394014	-0.145822	0.152487	-1.90153	0.0572338	0.177478
P53621	COPA	-0.395127	-0.170357	0.20746	-1.90116	0.0572819	0.177478
P31040	SDHA	-0.39455	-0.206764	0.240877	-1.90109	0.0572914	0.177478
Q9UID3	VPS51	-0.385731	-0.240017	0.145063	-1.9009	0.0573157	0.177478
O00408	PDE2A	-0.393813	-0.113173	0.213138	-1.89954	0.057494	0.177842
Q9BXQ6	TMEM121B	-0.399746	-0.303549	0.194896	-1.89838	0.0576473	0.17805
Q15262	PTPRK	-0.394363	-0.169614	0.255045	-1.89751	0.0577616	0.17805
P48454	PPP3CC	-0.410902	-0.18566	0.174371	-1.89715	0.0578095	0.17805
Q5D862	FLG2	-0.382127	-0.289648	0.172854	-1.89679	0.057857	0.17805
Q9H1Z4	WDR13	-0.388253	-0.221393	0.155872	-1.89672	0.0578661	0.17805
Q02338	BDH1	-0.392792	-0.170164	0.190882	-1.89363	0.0582757	0.17911
P37235	HPCAL1	-0.388296	-0.207941	0.147292	-1.89306	0.0583509	0.17911
Q9Y237	PIN4	-0.397753	-0.222956	0.12403	-1.89259	0.0584138	0.17911
P02730	SLC4A1	-0.390657	-0.242921	0.128632	-1.89227	0.0584562	0.17911
P02545	LMNA	-0.382229	-0.257026	0.0743394	-1.89163	0.0585409	0.179182
O75165	DNAJC13	-0.393156	-0.105994	0.130475	-1.89095	0.058632	0.179273
Q9H2W6	MRPL46	-0.412346	-0.250133	0.202605	-1.89003	0.0587548	0.17946
O43617	TRAPPC3	-0.3837	-0.266636	0.184371	-1.88823	0.0589968	0.179869
Q96Q05	TRAPPC9	-0.390134	-0.200537	0.199783	-1.88811	0.0590117	0.179869
Q7Z7E8	UBE2Q1	-0.39049	-0.19719	0.205441	-1.88748	0.0590975	0.179876
O95470	SGPL1	-0.409341	-0.183153	0.168953	-1.88718	0.0591374	0.179876
P51648	ALDH3A2	-0.392566	-0.150857	0.202275	-1.88654	0.0592239	0.179905
Q9HB21	PLEKHA1	-0.385901	-0.252007	0.192377	-1.88618	0.0592716	0.179905
O14617	AP3D1	-0.391412	-0.130751	0.221761	-1.88573	0.0593318	0.179905
P35998	PSMC2	-0.391755	-0.14057	0.218654	-1.88497	0.0594349	0.179929
Q86VP6	CAND1	-0.381018	-0.241756	0.129942	-1.88476	0.0594628	0.179929
P07814	EPRS1	-0.389926	-0.187026	0.195937	-1.88395	0.0595723	0.180074
P09914	IFIT1	-0.429489	-0.153282	0.201069	-1.88236	0.0597884	0.18054
Q8IUR0	TRAPPC5	-0.427463	-0.202988	0.222523	-1.88006	0.0601009	0.181214
P49754	VPS41	-0.384938	-0.194285	0.1233	-1.8798	0.0601359	0.181214
O75351	VPS4B	-0.39108	-0.157083	0.215848	-1.87924	0.0602132	0.18126
P05166	PCCB	-0.386916	-0.230911	0.205415	-1.87796	0.0603877	0.181599
P48643	CCT5	-0.390475	-0.150235	0.217376	-1.8771	0.0605057	0.181766
P11142	HSPA8	-0.385908	-0.218524	0.176094	-1.87551	0.060723	0.182126
Q96A35	MRPL24	-0.381835	-0.273827	0.202021	-1.87504	0.0607888	0.182126
Q9UM82	SPATA2	-0.426359	-0.267874	0.178157	-1.87486	0.0608125	0.182126
P17812	CTPS1	-0.386253	-0.176272	0.139999	-1.87436	0.0608814	0.182145
Q9Y4C2	TCAF1	-0.427402	-0.182188	0.232944	-1.87299	0.0610705	0.182524
A5YM72	CARNS1	-0.374628	-0.25977	-0.000766117	-1.87167	0.0612537	0.182699
Q9Y2E4	DIP2C	-0.387536	-0.177139	0.186416	-1.87166	0.0612542	0.182699
Q14318	FKBP8	-0.381562	-0.269205	0.202228	-1.87074	0.0613825	0.182745
Q8WW22	DNAJA4	-0.377286	-0.284907	0.172863	-1.87058	0.0614039	0.182745
Q96QZ7	MAGI1	-0.3751	-0.283638	0.106859	-1.8702	0.0614575	0.182745
Q13017	ARHGAP5	-0.38845	-0.148668	0.224239	-1.86844	0.061702	0.183286
P35240	NF2	-0.384611	-0.206221	0.167526	-1.86785	0.0617834	0.183327
Q9Y426	C2CD2	-0.382639	-0.234222	0.177585	-1.86669	0.0619459	0.183327
P48556	PSMD8	-0.385181	-0.118622	0.259338	-1.86663	0.0619541	0.183327
Q92747	ARPC1A	-0.386922	-0.16793	0.184274	-1.86626	0.0620064	0.183327
Q9NXW2	DNAJB12	-0.388665	-0.283552	0.160434	-1.86557	0.0621033	0.183327
Q14247	CTTN	-0.3848	-0.183752	0.162745	-1.86544	0.0621212	0.183327
O43854	EDIL3	-0.385998	-0.135101	0.13018	-1.86512	0.0621662	0.183327
P54886	ALDH18A1	-0.386257	-0.167381	0.177585	-1.8646	0.0622385	0.183327
Q8WWI1	LMO7	-0.409141	-0.217148	0.150378	-1.8643	0.0622811	0.183327
Q9Y484	WDR45	-0.380672	-0.235807	0.167267	-1.86296	0.0624688	0.183488
P17655	CAPN2	-0.428464	-0.245772	0.200015	-1.86255	0.0625265	0.183488
Q96JE9	MAP6	-0.38355	-0.234646	0.207184	-1.86206	0.0625957	0.183488
O95782	AP2A1	-0.386801	-0.186578	0.227135	-1.86124	0.0627108	0.183488
O14576	DYNC1I1	-0.381142	-0.226955	0.16507	-1.8609	0.0627593	0.183488
P52272	HNRNPM	-0.379066	-0.236164	0.156554	-1.86056	0.0628081	0.183488
Q9HCC0	MCCC2	-0.372287	-0.340582	0.0782069	-1.86053	0.0628113	0.183488
P11229	CHRM1	-0.385438	-0.21458	0.221772	-1.86034	0.0628382	0.183488
Q15599	SLC9A3R2	-0.377908	-0.276987	0.197084	-1.85985	0.062908	0.183508
P62266	RPS23	-0.377896	-0.254249	0.170542	-1.85888	0.0630448	0.183568
P19367	HK1	-0.382895	-0.260537	0.240284	-1.85878	0.0630589	0.183568
Q5QNW6	H2BC18	-0.383129	-0.184517	0.157347	-1.85837	0.0631173	0.183568
P19086	GNAZ	-0.382311	-0.231032	0.194306	-1.85739	0.0632572	0.183606
O95197	RTN3	-0.385445	-0.150512	0.169857	-1.85732	0.0632674	0.183606
O43795	MYO1B	-0.397045	-0.272747	0.177883	-1.85695	0.063319	0.183606
P36915	GNL1	-0.382918	-0.176522	0.157492	-1.85567	0.063502	0.183954
Q05084	ICA1	-0.384851	-0.177682	0.205692	-1.85403	0.0637352	0.184293
Q6FI81	CIAPIN1	-0.385448	-0.149345	0.184205	-1.85397	0.0637451	0.184293
P0CW24	PNMA6A	-0.393679	-0.260958	0.18486	-1.85278	0.0639144	0.184347
Q96F07	CYFIP2	-0.38552	-0.183273	0.245081	-1.85262	0.0639381	0.184347
Q14738	PPP2R5D	-0.381918	-0.202407	0.180233	-1.85245	0.0639626	0.184347
P48058	GRIA4	-0.381652	-0.24265	0.226819	-1.85162	0.0640808	0.184347
Q13418	ILK	-0.421121	-0.175369	0.173798	-1.85144	0.0641069	0.184347
Q7Z3J2	VPS35L	-0.3844	-0.117046	0.199662	-1.85119	0.0641427	0.184347
Q5VWZ2	LYPLAL1	-0.381772	-0.0688619	0.199344	-1.85071	0.0642126	0.184367
Q92558	WASF1	-0.382947	-0.143146	0.263542	-1.8496	0.0643722	0.184643
P31930	UQCRC1	-0.376795	-0.275627	0.20926	-1.84787	0.0646226	0.185179
Q6P1N0	CC2D1A	-0.370293	-0.291866	0.135501	-1.84549	0.064968	0.185361
Q96T17	MAP7D2	-0.398147	-0.264993	0.114153	-1.84485	0.0650601	0.185361
Q6ZWB6	KCTD8	-0.429165	-0.175495	0.206452	-1.84355	0.0652494	0.185361
Q9Y5K5	UCHL5	-0.370176	-0.253737	0.104501	-1.84339	0.065273	0.185361
Q9BZF3	OSBPL6	-0.375621	-0.230475	0.150435	-1.84315	0.0653082	0.185361
P32189	GK	-0.373	-0.281129	0.185598	-1.84273	0.065369	0.185361
O00560	SDCBP	-0.380482	-0.203344	0.197796	-1.84256	0.0653948	0.185361
Q9Y4X5	ARIH1	-0.383133	-0.086584	0.143248	-1.84245	0.0654098	0.185361
Q92932	PTPRN2	-0.382484	-0.188349	0.222519	-1.84185	0.0654989	0.185361
O60825	PFKFB2	-0.372687	-0.216363	0.102765	-1.84177	0.0655097	0.185361
Q86UE4	MTDH	-0.369281	-0.306837	0.133278	-1.84129	0.0655798	0.185361
P51659	HSD17B4	-0.380563	-0.199686	0.201643	-1.84114	0.0656018	0.185361
P34897	SHMT2	-0.382819	-0.151997	0.224557	-1.84084	0.0656468	0.185361
P68871	HBB	-0.368455	-0.275109	0.0197801	-1.84079	0.0656539	0.185361
Q9Y490	TLN1	-0.379388	-0.148597	0.11073	-1.84041	0.0657095	0.185361
Q9UL33	TRAPPC2L	-0.428713	-0.181707	0.191726	-1.84038	0.0657141	0.185361
Q92900	UPF1	-0.378932	-0.226889	0.194992	-1.84003	0.0657649	0.185361
Q9NVH0	EXD2	-0.42242	-0.220276	0.199877	-1.83935	0.0658642	0.185461
Q9UPW5	AGTPBP1	-0.37913	-0.186798	0.168594	-1.83761	0.0661206	0.185583
P78318	IGBP1	-0.368491	-0.309891	0.131796	-1.83756	0.0661283	0.185583
O95208	EPN2	-0.409531	-0.0756437	0.199347	-1.83744	0.0661466	0.185583
O60282	KIF5C	-0.381494	-0.111012	0.192964	-1.83733	0.0661617	0.185583
P13637	ATP1A3	-0.375173	-0.24983	0.183575	-1.83668	0.0662585	0.185677
Q96B97	SH3KBP1	-0.368642	-0.279563	0.136561	-1.8358	0.066389	0.185712
Q9BX40	LSM14B	-0.42154	-0.241136	0.182856	-1.83573	0.0663984	0.185712
P41252	IARS1	-0.380944	-0.161781	0.260578	-1.83528	0.066465	0.18572
P46781	RPS9	-0.367861	-0.294827	0.127588	-1.83384	0.0666787	0.185972
Q6ZTN6	ANKRD13D	-0.39737	-0.0998771	0.217253	-1.83381	0.0666826	0.185972
Q15173	PPP2R5B	-0.378365	-0.10769	0.241626	-1.83265	0.066856	0.186106
Q9UQ16	DNM3	-0.377755	-0.202225	0.176771	-1.83264	0.0668579	0.186106
P22607	FGFR3	-0.379591	-0.313297	0.158651	-1.83209	0.0669396	0.186156
P82933	MRPS9	-0.408385	-0.245873	0.201546	-1.83136	0.067048	0.186236
Q00975	CACNA1B	-0.380822	-0.17921	0.228369	-1.83085	0.0671238	0.186236
P56192	MARS1	-0.378745	-0.200477	0.209964	-1.83061	0.0671598	0.186236
P52594	AGFG1	-0.415426	-0.138017	0.151307	-1.82874	0.0674402	0.186776
P53602	MVD	-0.407102	-0.00625819	0.22982	-1.82805	0.0675426	0.186776
P15531	NME1	-0.376073	-0.205113	0.159002	-1.8278	0.0675805	0.186776
Q9UGM6	WARS2	-0.375139	-0.23553	0.184927	-1.8276	0.0676104	0.186776
P68366	TUBA4A	-0.37696	-0.19356	0.180601	-1.82651	0.0677744	0.186938
O00743	PPP6C	-0.36788	-0.232206	0.100665	-1.8261	0.0678368	0.186938
O94819	KBTBD11	-0.379216	-0.131051	0.215342	-1.82594	0.067861	0.186938
Q9NPQ8	RIC8A	-0.377871	-0.164784	0.169594	-1.82532	0.0679541	0.187018
Q9UL26	RAB22A	-0.379116	-0.161488	0.238071	-1.82324	0.068268	0.187705
P06396	GSN	-0.378301	-0.119495	0.142201	-1.82048	0.0686865	0.18804
P01116	KRAS	-0.378703	-0.195994	0.253801	-1.8201	0.0687444	0.18804
Q13057	COASY	-0.376075	-0.196062	0.194156	-1.82007	0.0687488	0.18804
P43155	CRAT	-0.377352	-0.18397	0.20508	-1.81994	0.0687696	0.18804
Q9Y6R1	SLC4A4	-0.36531	-0.273586	0.132182	-1.81866	0.0689648	0.18804
Q5W0V3	FHIP2A	-0.378258	-0.159364	0.202467	-1.81865	0.0689655	0.18804
O43592	XPOT	-0.375263	-0.0534893	0.199021	-1.81856	0.068979	0.18804
P62753	RPS6	-0.367593	-0.267269	0.162632	-1.81811	0.069049	0.18804
P50395	GDI2	-0.369431	-0.197632	0.0992016	-1.81736	0.0691634	0.18804
Q92777	SYN2	-0.375254	-0.21264	0.210927	-1.81694	0.0692277	0.18804
P62191	PSMC1	-0.377782	-0.158332	0.202578	-1.81618	0.0693432	0.18804
P16157	ANK1	-0.370107	-0.225294	0.137606	-1.81588	0.06939	0.18804
Q9UHQ9	CYB5R1	-0.373663	-0.22935	0.192519	-1.81532	0.0694756	0.18804
Q9Y2J2	EPB41L3	-0.373898	-0.195115	0.163302	-1.81445	0.0696099	0.18804
O43491	EPB41L2	-0.376667	-0.135148	0.154124	-1.81417	0.0696527	0.18804
P26196	DDX6	-0.37418	-0.204897	0.190552	-1.81374	0.0697185	0.18804
Q9UNM6	PSMD13	-0.373083	-0.197181	0.152856	-1.81239	0.0699274	0.18804
P22033	MMUT	-0.37011	-0.0244772	0.230889	-1.81222	0.0699538	0.18804
Q9H6U6	BCAS3	-0.372516	-0.233048	0.189081	-1.81217	0.0699616	0.18804
O00170	AIP	-0.372724	-0.178668	0.124525	-1.81195	0.0699956	0.18804
Q14168	MPP2	-0.367885	-0.25172	0.163527	-1.81133	0.0700906	0.18804
Q16850	CYP51A1	-0.388369	-0.213136	0.165481	-1.81108	0.0701295	0.18804
Q99798	ACO2	-0.375691	-0.152084	0.169865	-1.81079	0.0701752	0.18804
Q86UW7	CADPS2	-0.376008	-0.118507	0.200589	-1.81064	0.0701978	0.18804
P54619	PRKAG1	-0.374136	-0.209443	0.211709	-1.81054	0.0702138	0.18804
Q14677	CLINT1	-0.368321	-0.0453485	0.284175	-1.81023	0.0702616	0.18804
Q16836	HADH	-0.372952	-0.178782	0.14196	-1.80996	0.0703037	0.18804
Q15233	NONO	-0.372414	-0.230495	0.191268	-1.80988	0.0703152	0.18804
O75340	PDCD6	-0.365216	-0.247368	0.128162	-1.80986	0.070319	0.18804
P16104	H2AX	-0.375356	-0.208504	0.111198	-1.80966	0.0703493	0.18804
Q9HCE6	ARHGEF10L	-0.390493	-0.227993	0.186353	-1.80923	0.070417	0.18804
O76041	NEBL	-0.374071	-0.188607	0.151744	-1.80818	0.0705789	0.18804
Q8IVH4	MMAA	-0.397442	-0.228274	0.276132	-1.80773	0.070649	0.18804
P07384	CAPN1	-0.375613	-0.162761	0.247786	-1.80747	0.0706894	0.18804
Q15365	PCBP1	-0.373621	-0.179877	0.177169	-1.80746	0.070691	0.18804
Q9Y6Y8	SEC23IP	-0.408609	-0.219792	0.255997	-1.80679	0.0707967	0.18804
Q8TC12	RDH11	-0.371837	-0.196903	0.150157	-1.80673	0.0708057	0.18804
P01857	IGHG1	-0.362744	-0.244116	0.0939626	-1.80616	0.0708946	0.18804
O00487	PSMD14	-0.375171	-0.135633	0.217095	-1.80586	0.0709418	0.18804
P02533	KRT14	-0.362336	-0.272171	0.114672	-1.80566	0.0709721	0.18804
Q96HU8	DIRAS2	-0.36894	-0.230542	0.161445	-1.80517	0.0710491	0.18804
Q9BSD7	NTPCR	-0.366902	-0.238967	0.137933	-1.80488	0.0710947	0.18804
P26440	IVD	-0.372471	-0.200504	0.195079	-1.80359	0.0712971	0.188405
Q9NRZ7	AGPAT3	-0.374653	-0.136387	0.211436	-1.80242	0.0714801	0.188673
O00571	DDX3X	-0.371008	-0.192131	0.147715	-1.80212	0.0715277	0.188673
Q96FZ7	CHMP6	-0.372831	-0.146659	0.145857	-1.80122	0.0716697	0.188877
Q5JRX3	PITRM1	-0.371252	-0.18774	0.162471	-1.80062	0.071764	0.188955
Q9Y2R5	MRPS17	-0.374202	-0.179606	0.256089	-1.79903	0.0720149	0.189445
Q5VSL9	STRIP1	-0.408094	-0.229066	0.207226	-1.79805	0.0721701	0.189682
Q07817	BCL2L1	-0.411165	-0.191234	0.229339	-1.79757	0.0722456	0.18971
P63000	RAC1	-0.369339	-0.228368	0.183678	-1.79656	0.0724073	0.189963
Q08378	GOLGA3	-0.377742	-0.208665	0.167046	-1.79444	0.0727448	0.190677
Q969T9	WBP2	-0.414399	-0.227683	0.180542	-1.79398	0.0728178	0.190698
Q9BXM9	FSD1L	-0.372804	-0.132407	0.187202	-1.79147	0.0732186	0.191338
Q9NNW7	TXNRD2	-0.372646	-0.139015	0.19909	-1.79103	0.0732904	0.191338
Q16620	NTRK2	-0.37047	-0.191064	0.196534	-1.79099	0.0732963	0.191338
Q13509	TUBB3	-0.371706	-0.143467	0.163565	-1.79051	0.0733723	0.191338
P29992	GNA11	-0.369762	-0.176758	0.166883	-1.79014	0.0734318	0.191338
O76094	SRP72	-0.368704	-0.0851177	0.231421	-1.79	0.0734554	0.191338
Q9NZW5	PALS2	-0.367812	-0.0778566	0.240475	-1.78938	0.0735548	0.191426
Q9UI30	TRMT112	-0.417232	-0.216897	0.203159	-1.7887	0.0736636	0.191539
P13861	PRKAR2A	-0.365761	-0.208287	0.137958	-1.78752	0.073854	0.19161
Q9H2G2	SLK	-0.369753	-0.129304	0.253438	-1.78741	0.0738719	0.19161
P51798	CLCN7	-0.371763	-0.176648	0.225029	-1.78731	0.073888	0.19161
Q9H0W9	C11orf54	-0.417597	-0.231781	0.179643	-1.78657	0.0740082	0.191752
Q12756	KIF1A	-0.371062	-0.151005	0.184597	-1.7851	0.0742468	0.192199
O95757	HSPA4L	-0.370634	-0.110835	0.182353	-1.78348	0.074509	0.192204
P78371	CCT2	-0.370193	-0.155313	0.178309	-1.78325	0.0745461	0.192204
P33121	ACSL1	-0.370383	-0.132396	0.15544	-1.78296	0.0745944	0.192204
Q86SK9	SCD5	-0.367962	-0.177497	0.161061	-1.7828	0.0746199	0.192204
P54829	PTPN5	-0.367014	-0.229403	0.196852	-1.78236	0.0746918	0.192204
Q99615	DNAJC7	-0.393567	-0.144023	0.196381	-1.78227	0.0747061	0.192204
Q9Y2S7	POLDIP2	-0.386204	-0.189506	0.215979	-1.78192	0.0747635	0.192204
A5YKK6	CNOT1	-0.368824	-0.172692	0.179449	-1.78163	0.0748102	0.192204
Q9UK41	VPS28	-0.390113	-0.178184	0.113828	-1.78084	0.0749394	0.192204
P50402	EMD	-0.371419	-0.176227	0.244891	-1.78073	0.0749583	0.192204
P17174	GOT1	-0.357183	-0.275455	0.102517	-1.78064	0.0749728	0.192204
Q9P2E7	PCDH10	-0.380689	-0.215332	0.227871	-1.77832	0.0753518	0.193006
P05386	RPLP1	-0.363333	-0.227929	0.161492	-1.77618	0.0757036	0.193501
P19174	PLCG1	-0.390069	-0.0833386	0.236641	-1.77613	0.0757121	0.193501
O00468	AGRN	-0.381305	-0.159697	0.204165	-1.7751	0.0758831	0.193501
P04839	CYBB	-0.361741	-0.220701	0.0741249	-1.77502	0.0758959	0.193501
P48735	IDH2	-0.36791	-0.102014	0.199015	-1.77458	0.0759684	0.193501
P61158	ACTR3	-0.368989	-0.118207	0.183728	-1.77454	0.0759755	0.193501
Q16204	CCDC6	-0.362436	-0.0305672	0.237121	-1.77433	0.0760098	0.193501
Q96S59	RANBP9	-0.370937	-0.226672	0.17582	-1.77393	0.0760751	0.193501
Q99613	EIF3C	-0.359156	0.00723494	0.249163	-1.77321	0.0761945	0.193614
Q8TCU6	PREX1	-0.358519	-0.220835	0.0928415	-1.77287	0.0762521	0.193614
P78356	PIP4K2B	-0.368316	-0.145911	0.207766	-1.77021	0.0766926	0.193876
P26038	MSN	-0.364133	-0.189084	0.137578	-1.77019	0.0766961	0.193876
Q8IV01	SYT12	-0.361679	-0.267188	0.208776	-1.76903	0.0768903	0.193876
Q8N461	FBXL16	-0.358223	-0.227534	0.120184	-1.76902	0.0768921	0.193876
P36404	ARL2	-0.367966	-0.146351	0.195431	-1.76835	0.0770038	0.193876
O95292	VAPB	-0.362497	-0.222766	0.163632	-1.76824	0.0770212	0.193876
Q9H479	FN3K	-0.363938	-0.188344	0.143326	-1.76772	0.0771081	0.193876
Q9UIW2	PLXNA1	-0.366593	-0.114526	0.210437	-1.7675	0.0771449	0.193876
P21291	CSRP1	-0.365598	-0.131001	0.122651	-1.76709	0.0772145	0.193876
P78406	RAE1	-0.365305	-0.190731	0.191495	-1.76708	0.0772164	0.193876
Q969E2	SCAMP4	-0.362232	-0.173115	0.101498	-1.76687	0.0772509	0.193876
Q12904	AIMP1	-0.36583	-0.169815	0.177953	-1.76665	0.077288	0.193876
P36776	LONP1	-0.36581	-0.10391	0.21336	-1.76664	0.0772891	0.193876
Q5FWE3	PRRT3	-0.362581	-0.236531	0.185998	-1.7665	0.0773136	0.193876
Q504Y0	SLC39A12	-0.360525	-0.0804666	0.305364	-1.76627	0.0773513	0.193876
A0MZ66	SHTN1	-0.365667	-0.0833031	0.185426	-1.76553	0.0774757	0.194021
Q10567	AP1B1	-0.364758	-0.0896902	0.211352	-1.76499	0.0775669	0.194083
P62829	RPL23	-0.357992	-0.254284	0.162157	-1.76453	0.0776437	0.194105
Q8NI08	NCOA7	-0.374886	-0.0751177	0.22598	-1.76384	0.0777601	0.194105
O94973	AP2A2	-0.366714	-0.180961	0.225072	-1.76371	0.0777817	0.194105
P61221	ABCE1	-0.364498	-0.190086	0.1909	-1.76312	0.0778807	0.194105
Q5XPI4	RNF123	-0.397419	-0.168521	0.212252	-1.76281	0.0779335	0.194105
P10644	PRKAR1A	-0.364963	-0.147834	0.150795	-1.76236	0.0780097	0.194105
Q15811	ITSN1	-0.365237	-0.172158	0.187476	-1.76218	0.0780407	0.194105
P48444	ARCN1	-0.363618	-0.167359	0.15651	-1.76011	0.0783898	0.194786
O00410	IPO5	-0.365683	-0.136178	0.163501	-1.7597	0.0784602	0.194786
Q96MC5	BMERB1	-0.360711	-0.194041	0.128841	-1.759	0.078579	0.194786
Q92841	DDX17	-0.362679	-0.178198	0.150825	-1.75898	0.0785813	0.194786
O60684	KPNA6	-0.378771	-0.234346	0.182921	-1.75836	0.078687	0.194803
P49207	RPL34	-0.352526	-0.293356	0.10596	-1.75816	0.0787216	0.194803
P53992	SEC24C	-0.365757	-0.14228	0.198844	-1.75755	0.078826	0.194896
Q15019	SEPTIN2	-0.355646	-0.215903	0.110419	-1.75438	0.0793673	0.196026
Q9BXF6	RAB11FIP5	-0.365014	-0.168863	0.226813	-1.75408	0.0794175	0.196026
P55072	VCP	-0.362279	-0.195281	0.197171	-1.75244	0.0796988	0.196554
O00442	RTCA	-0.362703	-0.177745	0.186348	-1.75193	0.0797875	0.196607
Q9P2J5	LARS1	-0.360615	-0.203932	0.167659	-1.75086	0.0799709	0.196708
Q9HD26	GOPC	-0.398672	-0.325338	0.209667	-1.7501	0.0801024	0.196708
Q9Y496	KIF3A	-0.360887	-0.203773	0.187499	-1.74957	0.0801933	0.196708
O43583	DENR	-0.36391	-0.143045	0.205739	-1.74917	0.0802626	0.196708
P43686	PSMC4	-0.363374	-0.129316	0.20877	-1.74901	0.0802898	0.196708
Q6YN16	HSDL2	-0.360567	-0.175121	0.148352	-1.74852	0.0803749	0.196708
Q96HC4	PDLIM5	-0.385825	-0.0813713	0.170356	-1.74837	0.0804003	0.196708
Q9H267	VPS33B	-0.363789	-0.170738	0.226247	-1.74827	0.0804182	0.196708
Q99848	EBNA1BP2	-0.390836	-0.236892	0.147742	-1.74818	0.0804347	0.196708
Q9ULC3	RAB23	-0.359958	-0.204607	0.172927	-1.74706	0.0806287	0.197017
Q9NP78	ABCB9	-0.397732	-0.175697	0.100559	-1.74605	0.080804	0.19707
O60241	ADGRB2	-0.386956	-0.232736	0.140099	-1.74594	0.080822	0.19707
P21333	FLNA	-0.351599	-0.183346	0.0376105	-1.74577	0.0808529	0.19707
Q13875	MOBP	-0.357193	-0.170752	0.0914925	-1.74535	0.0809246	0.197081
Q96KP1	EXOC2	-0.360263	-0.164013	0.152213	-1.74389	0.0811794	0.197154
Q92973	TNPO1	-0.361066	-0.0766132	0.179411	-1.74379	0.0811961	0.197154
Q93034	CUL5	-0.397768	-0.112302	0.149015	-1.74308	0.0813203	0.197154
P60763	RAC3	-0.405253	-0.280223	0.233173	-1.74268	0.0813905	0.197154
O95562	SFT2D2	-0.405378	-0.185219	0.253991	-1.74264	0.0813968	0.197154
Q9H4G0	EPB41L1	-0.361483	-0.170837	0.191998	-1.74263	0.0813999	0.197154
P31321	PRKAR1B	-0.359449	-0.187023	0.145024	-1.7424	0.0814398	0.197154
Q16798	ME3	-0.349422	-0.3236	0.163852	-1.74192	0.0815242	0.197154
Q5HYI7	MTX3	-0.358182	-0.224381	0.180897	-1.74158	0.0815835	0.197154
Q16401	PSMD5	-0.361482	-0.11951	0.133276	-1.74131	0.0816298	0.197154
Q01064	PDE1B	-0.362133	-0.125939	0.181077	-1.74036	0.081797	0.197292
Q8WUY3	PRUNE2	-0.361667	-0.15386	0.186709	-1.74018	0.081829	0.197292
Q13409	DYNC1I2	-0.359198	-0.16021	0.141917	-1.73983	0.0818898	0.197292
P62280	RPS11	-0.35053	-0.255987	0.133662	-1.73895	0.0820452	0.19737
P57088	TMEM33	-0.35785	-0.213699	0.170894	-1.73888	0.0820574	0.19737
O76070	SNCG	-0.348025	-0.238025	0.0225093	-1.73636	0.0825011	0.198274
P13804	ETFA	-0.357271	-0.182858	0.136645	-1.73531	0.0826869	0.198282
Q12791	KCNMA1	-0.347097	-0.370993	0.0773196	-1.735	0.0827414	0.198282
O00214	LGALS8	-0.383752	-0.253502	0.162706	-1.73491	0.0827583	0.198282
Q7L523	RRAGA	-0.356946	-0.212844	0.168805	-1.73481	0.082776	0.198282
O43402	EMC8	-0.37418	-0.200056	0.163739	-1.73406	0.0829087	0.198437
Q14694	USP10	-0.358653	-0.183431	0.192699	-1.73256	0.0831757	0.198728
Q5XKP0	MICOS13	-0.355665	-0.228047	0.176604	-1.73228	0.0832247	0.198728
Q8IV38	ANKMY2	-0.349675	-0.230808	0.112165	-1.73116	0.0834245	0.198728
P60520	GABARAPL2	-0.354616	-0.22892	0.168525	-1.73098	0.0834567	0.198728
Q9Y450	HBS1L	-0.359218	-0.16312	0.186759	-1.73069	0.0835076	0.198728
Q9UL54	TAOK2	-0.368504	-0.258019	0.187747	-1.73068	0.0835107	0.198728
Q8WVR3	TRAPPC14	-0.373844	-0.232784	0.199865	-1.7305	0.0835418	0.198728
Q9BSJ8	ESYT1	-0.359942	-0.127912	0.183202	-1.7298	0.0836663	0.198728
Q05193	DNM1	-0.356403	-0.195723	0.163297	-1.72963	0.0836971	0.198728
Q9Y2Q3	GSTK1	-0.351824	-0.0273568	0.263239	-1.72956	0.0837107	0.198728
Q9UBS5	GABBR1	-0.350302	-0.276087	0.185529	-1.72819	0.0839559	0.199014
Q9UBC2	EPS15L1	-0.358817	-0.161876	0.193183	-1.72714	0.0841435	0.199014
Q6ZS17	RIPOR1	-0.388427	-0.183491	0.205119	-1.72709	0.084152	0.199014
Q00688	FKBP3	-0.348781	-0.246188	0.130536	-1.72707	0.0841571	0.199014
Q86U28	ISCA2	-0.372813	-0.0118884	0.229858	-1.72632	0.0842912	0.199014
P41222	PTGDS	-0.35632	-0.155856	0.134417	-1.72629	0.0842957	0.199014
O95081	AGFG2	-0.354742	-0.064667	0.226219	-1.72622	0.0843082	0.199014
O94811	TPPP	-0.358623	-0.134558	0.20988	-1.7254	0.0844564	0.199137
O95822	MLYCD	-0.372716	-0.20034	0.218106	-1.72518	0.0844967	0.199137
P16389	KCNA2	-0.350068	-0.23448	0.140306	-1.72427	0.0846594	0.199359
P02768	ALB	-0.344854	-0.28067	0.0310435	-1.72274	0.0849373	0.199852
P12236	SLC25A6	-0.345213	-0.326198	0.159342	-1.72122	0.0852127	0.200219
Q86VP1	TAX1BP1	-0.385614	-0.203678	0.160319	-1.72076	0.0852958	0.200219
Q8WXG6	MADD	-0.351853	-0.227883	0.160623	-1.72043	0.0853552	0.200219
Q5TC12	ATPAF1	-0.372724	-0.19836	0.204276	-1.72036	0.0853673	0.200219
P17931	LGALS3	-0.344282	-0.292483	0.0835204	-1.71809	0.0857822	0.200494
Q15831	STK11	-0.392715	-0.267182	0.204848	-1.71734	0.0859189	0.200494
Q5SQI0	ATAT1	-0.348437	-0.249526	0.156667	-1.71724	0.0859357	0.200494
Q7L576	CYFIP1	-0.383881	-0.160153	0.207923	-1.71715	0.0859527	0.200494
Q9BYC9	MRPL20	-0.353469	-0.233495	0.202055	-1.71657	0.0860591	0.200494
P39210	MPV17	-0.386767	-0.233231	0.162171	-1.71637	0.086095	0.200494
Q92575	UBXN4	-0.383687	-0.171919	0.151542	-1.71564	0.08623	0.200494
Q9Y6A2	CYP46A1	-0.354495	-0.23016	0.237113	-1.7156	0.0862358	0.200494
Q9BR76	CORO1B	-0.35325	-0.150962	0.101431	-1.71506	0.0863349	0.200494
Q02153	GUCY1B1	-0.356481	-0.154997	0.190084	-1.71486	0.0863719	0.200494
P78344	EIF4G2	-0.354446	-0.159811	0.15408	-1.71424	0.0864867	0.200494
P22694	PRKACB	-0.354517	-0.0912623	0.206124	-1.71386	0.0865557	0.200494
Q9Y2S6	TMA7	-0.353496	-0.15333	0.124955	-1.71362	0.0865999	0.200494
Q00604	NDP	-0.365327	-0.0469361	0.178898	-1.71343	0.0866346	0.200494
O43272	PRODH	-0.355965	-0.115804	0.189124	-1.71297	0.0867194	0.200494
Q92688	ANP32B	-0.395036	-0.183407	0.168317	-1.71251	0.0868035	0.200494
Q14DG7	TMEM132B	-0.366373	-0.258694	0.134572	-1.71224	0.0868528	0.200494
Q00005	PPP2R2B	-0.392613	-0.139822	0.0885914	-1.71224	0.0868544	0.200494
P04264	KRT1	-0.344362	-0.262357	0.128205	-1.71221	0.0868591	0.200494
Q8N3E9	PLCD3	-0.356161	-0.145671	0.201643	-1.71144	0.0870009	0.200494
P13639	EEF2	-0.355031	-0.134176	0.147818	-1.71111	0.0870622	0.200494
Q9UPP5	BTBD8	-0.366524	-0.263714	0.146013	-1.71109	0.0870648	0.200494
Q9UNH7	SNX6	-0.355009	-0.119849	0.13331	-1.71022	0.0872263	0.200494
P82664	MRPS10	-0.382842	-0.258124	0.178695	-1.71016	0.0872379	0.200494
O76003	GLRX3	-0.35343	-0.0733441	0.189772	-1.70994	0.0872773	0.200494
Q9ULP9	TBC1D24	-0.375935	-0.221034	0.238092	-1.70982	0.0872995	0.200494
Q7RTN6	STRADA	-0.355315	-0.141681	0.218904	-1.7095	0.0873604	0.200494
P60709	ACTB	-0.355507	-0.14862	0.189186	-1.70924	0.0874071	0.200494
O94903	PLPBP	-0.350939	-0.0517336	0.215608	-1.70874	0.0875004	0.20055
Q15119	PDK2	-0.353875	-0.193354	0.213181	-1.70757	0.0877171	0.200889
Q969Z3	MTARC2	-0.351431	-0.212406	0.17352	-1.70698	0.0878275	0.200985
Q9H8M1	COQ10B	-0.354371	-0.198266	0.238067	-1.70589	0.0880295	0.201147
Q9Y277	VDAC3	-0.351205	-0.239397	0.20757	-1.70586	0.0880361	0.201147
Q9UQN3	CHMP2B	-0.342797	-0.260948	0.122662	-1.70524	0.0881516	0.201253
Q14416	GRM2	-0.349946	-0.21702	0.162024	-1.70473	0.0882462	0.201312
P40227	CCT6A	-0.353452	-0.151139	0.167273	-1.70391	0.0883992	0.201503
P60866	RPS20	-0.342989	-0.26854	0.143944	-1.70318	0.0885348	0.201655
P03905	MT-ND4	-0.343052	-0.304667	0.1674	-1.70154	0.0888425	0.202198
Q9ULN7	PNMA8B	-0.359123	-0.185798	0.187956	-1.70108	0.0889288	0.202237
Q86TP1	PRUNE1	-0.352849	-0.153323	0.175267	-1.69983	0.0891644	0.202582
P07195	LDHB	-0.341027	-0.242043	0.0800649	-1.69931	0.0892625	0.202582
Q8TB37	NUBPL	-0.340923	-0.284659	0.1275	-1.69907	0.0893077	0.202582
Q8NEU8	APPL2	-0.353426	-0.0958123	0.12654	-1.6988	0.089358	0.202582
Q99747	NAPG	-0.350699	-0.188243	0.178526	-1.69839	0.0894357	0.202601
Q68D91	MBLAC2	-0.391452	-0.210748	0.137194	-1.69607	0.089873	0.20315
Q14194	CRMP1	-0.352785	-0.116557	0.176285	-1.69601	0.0898854	0.20315
Q06124	PTPN11	-0.368809	-0.135025	0.200865	-1.69598	0.089891	0.20315
O75832	PSMD10	-0.355778	-0.041212	0.294784	-1.69555	0.0899732	0.20315
Q14974	KPNB1	-0.349467	-0.0482761	0.178924	-1.69527	0.090026	0.20315
Q5T5P2	KIAA1217	-0.345486	-0.238479	0.161973	-1.69462	0.0901496	0.203177
P63302	SELENOW	-0.352151	-0.151225	0.183579	-1.69436	0.0901986	0.203177
P40926	MDH2	-0.350553	-0.160883	0.162542	-1.69385	0.0902954	0.203177
P14136	GFAP	-0.351596	-0.144276	0.16417	-1.69374	0.0903165	0.203177
Q9UJW0	DCTN4	-0.352121	-0.113146	0.173306	-1.69292	0.0904713	0.203369
O75061	DNAJC6	-0.351433	-0.104976	0.17794	-1.6915	0.0907418	0.20382
Q9H1K0	RBSN	-0.34903	-0.157313	0.13724	-1.69078	0.0908792	0.203972
O95721	SNAP29	-0.348619	-0.169039	0.148045	-1.68946	0.0911324	0.204383
Q9Y5M8	SRPRB	-0.349321	-0.187423	0.191872	-1.68876	0.0912658	0.204525
P28331	NDUFS1	-0.348143	-0.220904	0.212704	-1.68722	0.0915616	0.204941
Q7Z4W1	DCXR	-0.347327	-0.181645	0.137131	-1.68672	0.0916586	0.204941
Q86UP2	KTN1	-0.359279	-0.115988	0.123971	-1.68644	0.0917127	0.204941
P0DMV9	HSPA1B	-0.348704	-0.164677	0.164851	-1.68545	0.0919029	0.204941
Q86V21	AACS	-0.360251	-0.228058	0.152215	-1.68533	0.0919264	0.204941
Q96GC9	VMP1	-0.348335	-0.207242	0.211976	-1.68504	0.091982	0.204941
Q8WVD5	RNF141	-0.348941	-0.107552	0.21687	-1.68497	0.0919963	0.204941
P20936	RASA1	-0.350637	-0.106426	0.153067	-1.68488	0.0920128	0.204941
O60493	SNX3	-0.347719	-0.190623	0.186991	-1.6829	0.0923948	0.205603
Q9UQ03	CORO2B	-0.349987	-0.12927	0.192928	-1.68261	0.0924509	0.205603
Q8IXS8	FAM126B	-0.34751	-0.184301	0.179288	-1.68185	0.0925997	0.205777
Q13614	MTMR2	-0.380691	-0.100998	0.175482	-1.68119	0.0927274	0.205809
P02511	CRYAB	-0.344745	-0.166719	0.0947787	-1.68105	0.0927552	0.205809
P21589	NT5E	-0.336894	-0.285389	0.0853745	-1.68065	0.0928311	0.205821
O00232	PSMD12	-0.349077	-0.128223	0.205015	-1.67986	0.0929848	0.205959
Q6PHR2	ULK3	-0.386066	-0.174583	0.213885	-1.67961	0.0930343	0.205959
Q969L2	MAL2	-0.34242	-0.261775	0.192073	-1.6792	0.0931144	0.20598
Q9BVC4	MLST8	-0.346048	-0.178875	0.151043	-1.67842	0.0932656	0.206159
Q9UPR5	SLC8A2	-0.348731	-0.162539	0.199744	-1.67754	0.0934379	0.206383
Q9HD42	CHMP1A	-0.335484	-0.354386	0.113503	-1.67623	0.093694	0.206667
O15511	ARPC5	-0.348427	-0.138966	0.169721	-1.67616	0.0937079	0.206667
P30048	PRDX3	-0.34151	-0.236905	0.161965	-1.67424	0.0940837	0.20711
Q9NQ66	PLCB1	-0.342863	-0.078351	0.274789	-1.67404	0.0941242	0.20711
B9A064	IGLL5	-0.35507	-0.27603	0.0409088	-1.67386	0.0941598	0.20711
Q9Y2L5	TRAPPC8	-0.338026	-0.227011	0.106806	-1.67369	0.0941924	0.20711
Q9UH03	SEPTIN3	-0.345099	-0.221919	0.220527	-1.67132	0.0946593	0.207868
O43670	ZNF207	-0.34487	-0.181457	0.16596	-1.67093	0.0947357	0.207868
Q96MX6	DNAAF10	-0.36309	-0.175942	0.198475	-1.67086	0.094751	0.207868
Q8NFV4	ABHD11	-0.338065	-0.250646	0.146917	-1.67029	0.094863	0.207958
Q9H8M5	CNNM2	-0.384294	-0.182769	0.188785	-1.66958	0.0950027	0.208108
P27448	MARK3	-0.391674	-0.235747	0.203366	-1.66893	0.0951326	0.208236
Q9UJS0	SLC25A13	-0.346777	-0.113758	0.180722	-1.66803	0.0953103	0.208469
Q15185	PTGES3	-0.345188	-0.147248	0.149085	-1.66709	0.0954977	0.208723
P11413	G6PD	-0.388085	-0.155451	0.217514	-1.66561	0.0957913	0.209208
P62714	PPP2CB	-0.343373	-0.0830656	0.208866	-1.66276	0.096361	0.210118
Q9Y5S1	TRPV2	-0.368886	-0.2826	0.133087	-1.662	0.0965143	0.210118
Q9BQI5	SGIP1	-0.336947	-0.270069	0.178948	-1.66193	0.0965275	0.210118
O00192	ARVCF	-0.37959	-0.197897	0.245451	-1.66184	0.0965466	0.210118
Q330K2	NDUFAF6	-0.343944	-0.149404	0.150875	-1.6613	0.0966552	0.210118
Q13496	MTM1	-0.379892	-0.111136	0.199573	-1.66128	0.0966576	0.210118
P49674	CSNK1E	-0.341809	-0.200678	0.154273	-1.66101	0.0967119	0.210118
Q15276	RABEP1	-0.344604	-0.0897184	0.171185	-1.66035	0.0968446	0.21025
O95563	MPC2	-0.34043	-0.213196	0.15698	-1.65847	0.0972236	0.210916
Q6ZVL6	KIAA1549L	-0.332649	-0.284629	0.122283	-1.65804	0.0973112	0.210949
Q9NR31	SAR1A	-0.343773	-0.118358	0.213531	-1.65723	0.0974732	0.211144
Q05639	EEF1A2	-0.344163	-0.132139	0.213751	-1.65674	0.0975723	0.211202
Q9HBH5	RDH14	-0.344137	-0.13843	0.218992	-1.65625	0.0976713	0.211259
P20810	CAST	-0.331524	-0.312546	0.0823554	-1.65574	0.0977761	0.211301
Q14139	UBE4A	-0.371214	-0.109762	0.24281	-1.65545	0.0978351	0.211301
Q6L8Q7	PDE12	-0.339585	-0.0323692	0.19688	-1.65442	0.0980426	0.211554
P22695	UQCRC2	-0.340058	-0.24686	0.207092	-1.65407	0.0981154	0.211554
Q9BV35	SLC25A23	-0.33537	-0.253664	0.159317	-1.6538	0.0981699	0.211554
Q93100	PHKB	-0.352853	-0.13122	0.186923	-1.65263	0.0984072	0.211909
O00478	BTN3A3	-0.342145	-0.0668763	0.16316	-1.65165	0.098608	0.212185
Q9Y2H9	MAST1	-0.361117	-0.184584	0.173796	-1.65017	0.0989096	0.212647
Q14195	DPYSL3	-0.340459	-0.103446	0.239959	-1.64984	0.0989777	0.212647
Q9H1K1	ISCU	-0.33363	-0.230023	0.11888	-1.6491	0.0991274	0.212647
Q15111	PLCL1	-0.34015	-0.0575036	0.184732	-1.64886	0.0991767	0.212647
P31689	DNAJA1	-0.337291	-0.206919	0.135256	-1.64881	0.0991868	0.212647
Q5SSJ5	HP1BP3	-0.332306	-0.242977	0.11909	-1.64795	0.0993638	0.212855
P05023	ATP1A1	-0.331234	-0.273791	0.139213	-1.64763	0.0994296	0.212855
P27144	AK4	-0.341959	-0.133537	0.214551	-1.646	0.099764	0.213415
P49802	RGS7	-0.3411	-0.1679	0.183706	-1.64536	0.0998963	0.213479
P61163	ACTR1A	-0.341876	-0.0997463	0.168813	-1.64515	0.0999403	0.213479
P35241	RDX	-0.338798	-0.150112	0.116701	-1.643	0.100385	0.214258
P50991	CCT4	-0.340922	-0.148818	0.168205	-1.64267	0.100452	0.214258
P30405	PPIF	-0.333479	-0.0355862	0.284947	-1.64209	0.100573	0.214316
Q9NWU5	MRPL22	-0.359275	-0.245781	0.183604	-1.64183	0.100626	0.214316
Q9BV79	MECR	-0.35452	-0.165488	0.180763	-1.6397	0.101068	0.215101
Q9UBP0	SPAST	-0.339644	-0.164023	0.180925	-1.63789	0.101446	0.215749
O95989	NUDT3	-0.369032	0.0342059	0.14972	-1.63648	0.101741	0.216086
Q13885	TUBB2A	-0.337219	-0.185655	0.151757	-1.63642	0.101753	0.216086
Q8WVF1	OSCP1	-0.344092	-0.0717258	0.143618	-1.63553	0.10194	0.216327
P17152	TMEM11	-0.337112	-0.195724	0.174031	-1.63481	0.102091	0.216489
P31948	STIP1	-0.338398	-0.0564557	0.15059	-1.63365	0.102333	0.216844
Q9NTJ5	SACM1L	-0.339496	-0.139322	0.172591	-1.63283	0.102505	0.217053
P40123	CAP2	-0.332975	-0.204506	0.127475	-1.62975	0.103155	0.21827
Q99614	TTC1	-0.365694	-0.205706	0.115736	-1.62836	0.10345	0.218737
Q2LD37	KIAA1109	-0.360897	-0.174335	0.173444	-1.62684	0.103772	0.219257
Q5GLZ8	HERC4	-0.352444	-0.111751	0.260964	-1.62625	0.103899	0.219257
P35606	COPB2	-0.338329	-0.138844	0.181441	-1.62613	0.103923	0.219257
Q8TAM6	ERMN	-0.335714	-0.113663	0.0869566	-1.62544	0.10407	0.219257
O60359	CACNG3	-0.331781	-0.251118	0.138676	-1.62543	0.104072	0.219257
P62195	PSMC5	-0.337927	-0.138555	0.185098	-1.624	0.104376	0.21974
Q9H3P7	ACBD3	-0.333753	-0.079308	0.239478	-1.62319	0.10455	0.219793
P35611	ADD1	-0.336716	-0.158837	0.177161	-1.62318	0.104552	0.219793
P28676	GCA	-0.36406	-0.0912124	0.129343	-1.62225	0.104752	0.219899
P52564	MAP2K6	-0.335679	-0.10103	0.215684	-1.62224	0.104753	0.219899
P23743	DGKA	-0.330906	-0.198059	0.116213	-1.62098	0.105023	0.220295
Q9Y2C4	EXOG	-0.327387	-0.257533	0.146386	-1.62059	0.105107	0.220295
Q8IZU2	WDR17	-0.356088	-0.123644	0.240928	-1.6203	0.105168	0.220295
Q969P0	IGSF8	-0.327673	-0.253157	0.147818	-1.61969	0.105299	0.220411
O60477	BRINP1	-0.369564	-0.253786	0.169839	-1.61897	0.105456	0.220581
P14866	HNRNPL	-0.328546	-0.22233	0.126287	-1.61778	0.105712	0.220755
Q9NQ92	COPRS	-0.365159	-0.0750692	0.221564	-1.61761	0.105748	0.220755
Q9BW83	IFT27	-0.335563	-0.155466	0.173392	-1.61753	0.105766	0.220755
P48059	LIMS1	-0.353664	-0.164567	0.156861	-1.61642	0.106004	0.220919
P19022	CDH2	-0.327922	-0.194018	0.0865832	-1.61629	0.106033	0.220919
Q7L0J3	SV2A	-0.329735	-0.251645	0.181435	-1.61611	0.106072	0.220919
Q9BQ69	MACROD1	-0.327805	-0.00359732	0.250492	-1.61551	0.106202	0.221034
Q9H0C5	BTBD1	-0.362068	-0.234583	0.155073	-1.61501	0.10631	0.221101
Q00169	PITPNA	-0.334651	-0.112223	0.206674	-1.61337	0.106664	0.221445
Q6H8Q1	ABLIM2	-0.333393	-0.16344	0.156695	-1.61282	0.106784	0.221445
Q8TDX7	NEK7	-0.358374	-0.109867	0.125763	-1.61277	0.106795	0.221445
P51178	PLCD1	-0.335286	-0.103883	0.16648	-1.61254	0.106845	0.221445
P00492	HPRT1	-0.337438	-0.284094	0.182935	-1.6125	0.106855	0.221445
P04899	GNAI2	-0.334217	-0.139786	0.150515	-1.61171	0.107026	0.221539
Q96S97	MYADM	-0.326917	-0.294928	0.0445279	-1.61139	0.107095	0.221539
P15311	EZR	-0.334922	-0.143928	0.182998	-1.6103	0.107333	0.221539
Q9BSU1	PHAF1	-0.345345	-0.206101	0.157877	-1.60973	0.107457	0.221539
Q13526	PIN1	-0.331986	-0.166297	0.141203	-1.60935	0.107541	0.221539
Q15008	PSMD6	-0.334685	-0.126302	0.189546	-1.60907	0.107601	0.221539
Q13362	PPP2R5C	-0.332748	-0.169069	0.166799	-1.60907	0.107602	0.221539
P62745	RHOB	-0.325267	-0.234441	0.12109	-1.60888	0.107645	0.221539
P49327	FASN	-0.332407	-0.0406182	0.149953	-1.60849	0.107729	0.221539
Q96MZ0	GDAP1L1	-0.334543	-0.136628	0.202754	-1.60841	0.107747	0.221539
P16435	POR	-0.334121	-0.118237	0.195659	-1.60832	0.107766	0.221539
Q9NVH1	DNAJC11	-0.326351	-0.252536	0.161214	-1.60812	0.107811	0.221539
P04216	THY1	-0.325434	-0.24362	0.142539	-1.60631	0.108206	0.222186
O00231	PSMD11	-0.330278	-0.076617	0.23065	-1.60532	0.108425	0.222186
Q9H0R4	HDHD2	-0.331267	-0.145269	0.120155	-1.60508	0.108476	0.222186
O14950	MYL12B	-0.324499	-0.229465	0.1151	-1.60499	0.108497	0.222186
Q9P2E9	RRBP1	-0.322725	-0.231866	0.0891855	-1.60479	0.108542	0.222186
P40925	MDH1	-0.322462	-0.23274	0.0860151	-1.60433	0.108642	0.222186
Q9GZP4	PITHD1	-0.336212	-0.191541	0.178336	-1.60394	0.108728	0.222186
Q9NZT2	OGFR	-0.344694	-0.228965	0.113996	-1.60391	0.108734	0.222186
P38606	ATP6V1A	-0.330572	-0.21486	0.205426	-1.60202	0.109152	0.222802
Q9UIA9	XPO7	-0.332719	-0.0630761	0.158757	-1.60099	0.10938	0.222802
P30084	ECHS1	-0.333038	-0.148715	0.194201	-1.60066	0.109454	0.222802
Q8N4Q0	ZADH2	-0.332371	-0.114537	0.195714	-1.60053	0.109483	0.222802
P30085	CMPK1	-0.332113	-0.0891689	0.171507	-1.6003	0.109532	0.222802
Q8WXS5	CACNG8	-0.320521	-0.311934	0.0995405	-1.59996	0.109609	0.222802
Q9NRW7	VPS45	-0.332811	-0.123287	0.159629	-1.59987	0.109629	0.222802
P46782	RPS5	-0.325797	-0.229138	0.146083	-1.59979	0.109646	0.222802
P62857	RPS28	-0.323978	-0.221152	0.114149	-1.59919	0.109779	0.222917
O00483	NDUFA4	-0.329645	-0.188142	0.164443	-1.59861	0.109909	0.223025
Q9UQ90	SPG7	-0.330028	-0.178989	0.169755	-1.59776	0.110097	0.223183
Q9UI15	TAGLN3	-0.324879	-0.26014	0.179263	-1.59757	0.110139	0.223183
P14649	MYL6B	-0.329208	-0.196443	0.17079	-1.59698	0.110271	0.223271
O60890	OPHN1	-0.331393	-0.143413	0.161738	-1.59669	0.110335	0.223271
O95373	IPO7	-0.331911	-0.101757	0.161268	-1.59601	0.110488	0.223425
P27544	CERS1	-0.330446	-0.16747	0.176876	-1.59536	0.110632	0.223562
Q9NQC3	RTN4	-0.331393	-0.079313	0.140457	-1.59438	0.110851	0.223849
P12931	SRC	-0.329118	-0.197468	0.193128	-1.59333	0.111088	0.224101
P55011	SLC12A2	-0.330083	-0.144114	0.149678	-1.59314	0.11113	0.224101
Q15814	TBCC	-0.338048	-0.0286931	0.178234	-1.5924	0.111295	0.224127
Q6P587	FAHD1	-0.366821	-0.22561	0.208752	-1.59195	0.111397	0.224127
Q15818	NPTX1	-0.319258	-0.273919	0.100747	-1.59157	0.111482	0.224127
Q8N9R8	SCAI	-0.330272	-0.104933	0.1869	-1.59085	0.111645	0.224127
P26640	VARS1	-0.327891	-0.058279	0.190682	-1.59044	0.111737	0.224127
Q9H492	MAP1LC3A	-0.322765	-0.217701	0.118082	-1.59023	0.111783	0.224127
P27338	MAOB	-0.330686	-0.168772	0.214035	-1.58996	0.111846	0.224127
Q8IV50	LYSMD2	-0.349421	0.0160196	0.254411	-1.58978	0.111887	0.224127
P54289	CACNA2D1	-0.318689	-0.297692	0.126924	-1.58885	0.112094	0.224127
O95825	CRYZL1	-0.358046	-0.235944	0.165221	-1.58879	0.11211	0.224127
Q9H845	ACAD9	-0.327732	-0.206733	0.19181	-1.58875	0.112118	0.224127
Q15370	ELOB	-0.325932	-0.0399333	0.210922	-1.58867	0.112135	0.224127
O00399	DCTN6	-0.359242	-0.153992	0.158847	-1.58865	0.11214	0.224127
Q02246	CNTN2	-0.322994	-0.217275	0.125795	-1.58817	0.112249	0.224191
P30041	PRDX6	-0.326452	-0.192741	0.141675	-1.58715	0.112479	0.224497
O95817	BAG3	-0.321215	-0.25691	0.079918	-1.58561	0.11283	0.225043
Q15436	SEC23A	-0.327245	-0.175186	0.163168	-1.58462	0.113054	0.225337
Q8IXI1	RHOT2	-0.318986	-0.268053	0.144288	-1.58375	0.113252	0.22546
P30050	RPL12	-0.319583	-0.250801	0.133073	-1.58352	0.113303	0.22546
Q9Y2J0	RPH3A	-0.318781	-0.263727	0.140646	-1.58227	0.11359	0.22546
Q5JPH6	EARS2	-0.329032	-0.161192	0.203522	-1.58212	0.113624	0.22546
Q9NQ79	CRTAC1	-0.317379	-0.242289	0.0721005	-1.58181	0.113693	0.22546
Q92752	TNR	-0.362364	-0.239634	0.225728	-1.58168	0.113725	0.22546
Q9P1U1	ACTR3B	-0.327604	-0.164566	0.173828	-1.58151	0.113763	0.22546
Q9H1K4	SLC25A18	-0.333472	-0.0455353	0.205783	-1.5815	0.113764	0.22546
Q15771	RAB30	-0.33808	-0.202952	0.137589	-1.58114	0.113847	0.22546
Q6UXV4	APOOL	-0.325736	-0.219638	0.191818	-1.58096	0.113888	0.22546
Q9UN36	NDRG2	-0.316182	-0.334057	0.0492042	-1.58038	0.114021	0.22557
P51149	RAB7A	-0.325648	-0.17022	0.13488	-1.58001	0.114105	0.225583
P09972	ALDOC	-0.328184	-0.126163	0.14969	-1.57946	0.114232	0.225681
Q75T13	PGAP1	-0.340005	-0.265846	0.220965	-1.57863	0.114422	0.225905
P22059	OSBP	-0.32828	-0.0997168	0.140675	-1.57754	0.114672	0.226167
Q8N8S7	ENAH	-0.317875	-0.245335	0.120821	-1.57678	0.114847	0.226167
P52907	CAPZA1	-0.327587	-0.126337	0.203512	-1.57656	0.114898	0.226167
P47897	QARS1	-0.32803	-0.119521	0.162286	-1.57641	0.114932	0.226167
P43487	RANBP1	-0.327381	-0.0860189	0.158921	-1.57637	0.114943	0.226167
P18077	RPL35A	-0.326494	-0.184067	0.201217	-1.57552	0.115138	0.226272
A1L0T0	ILVBL	-0.325759	-0.165344	0.162006	-1.5753	0.115189	0.226272
P41250	GARS1	-0.32204	-0.0219954	0.218929	-1.57509	0.115236	0.226272
O94826	TOMM70	-0.327697	-0.13458	0.190948	-1.57479	0.115306	0.226272
P62241	RPS8	-0.31663	-0.255662	0.119311	-1.57443	0.11539	0.226285
Q9NVA2	SEPTIN11	-0.320641	-0.260839	0.187233	-1.57391	0.115509	0.226367
P18433	PTPRA	-0.325179	-0.06588	0.181728	-1.57353	0.115598	0.226388
P0CG08	GPR89B	-0.326214	-0.174722	0.195788	-1.57283	0.11576	0.226489
Q9NXC2	GFOD1	-0.326217	-0.16427	0.183642	-1.57264	0.115804	0.226489
Q8NEN9	PDZD8	-0.358405	-0.207658	0.179028	-1.57156	0.116055	0.226809
Q9Y4C0	NRXN3	-0.358662	-0.210087	0.170981	-1.57105	0.116173	0.226809
Q07955	SRSF1	-0.326756	-0.122281	0.156857	-1.57093	0.116201	0.226809
Q93050	ATP6V0A1	-0.323296	-0.243042	0.212517	-1.57025	0.116359	0.226881
Q9Y4J8	DTNA	-0.326159	-0.0738788	0.140316	-1.57004	0.116407	0.226881
P0DP58	LYNX1	-0.352246	-0.18244	0.199255	-1.56977	0.116471	0.226881
Q9Y4W6	AFG3L2	-0.32288	-0.226528	0.189662	-1.56852	0.116762	0.227033
Q16891	IMMT	-0.317138	-0.267965	0.163932	-1.56842	0.116784	0.227033
Q8NFA0	USP32	-0.35296	-0.152374	0.174455	-1.56797	0.116889	0.227033
O75367	MACROH2A1	-0.352636	-0.181339	0.169862	-1.5677	0.116953	0.227033
P05388	RPLP0	-0.315419	-0.26271	0.131641	-1.56754	0.116989	0.227033
Q86YZ3	HRNR	-0.315886	-0.223873	0.0922515	-1.56743	0.117015	0.227033
P30153	PPP2R1A	-0.32439	-0.0601157	0.157924	-1.56653	0.117227	0.227292
P15924	DSP	-0.314967	-0.231019	0.0913395	-1.56543	0.117484	0.227639
P48728	AMT	-0.329898	-0.122545	0.182335	-1.56488	0.117613	0.227675
Q9UJU6	DBNL	-0.32495	-0.0922285	0.164542	-1.56437	0.117731	0.227675
Q9P015	MRPL15	-0.332967	-0.268808	0.179767	-1.5637	0.11789	0.227675
Q9BUL8	PDCD10	-0.315472	-0.224328	0.0983801	-1.56362	0.117908	0.227675
Q14982	OPCML	-0.313371	-0.29049	0.097078	-1.56308	0.118035	0.227675
Q9NP81	SARS2	-0.319449	-0.0298458	0.232099	-1.56307	0.118037	0.227675
P14621	ACYP2	-0.322556	-0.160938	0.138791	-1.56302	0.118048	0.227675
P55039	DRG2	-0.323059	-0.149583	0.144084	-1.56186	0.118322	0.228052
Q9GZS3	WDR61	-0.318361	-0.209151	0.126228	-1.56113	0.118495	0.228126
P62330	ARF6	-0.322099	-0.184148	0.166338	-1.56104	0.118516	0.228126
Q9NZJ7	MTCH1	-0.317578	-0.238769	0.1555	-1.5605	0.118643	0.228146
Q9UMF0	ICAM5	-0.320575	-0.244924	0.20106	-1.56033	0.118683	0.228146
Q13303	KCNAB2	-0.31492	-0.244327	0.126896	-1.55981	0.118807	0.228234
O95571	ETHE1	-0.338341	-0.149437	0.175332	-1.55893	0.119014	0.228299
P49840	GSK3A	-0.321562	-0.190418	0.174436	-1.5584	0.11914	0.228299
P18621	RPL17	-0.315484	-0.236605	0.13119	-1.55809	0.119212	0.228299
Q9BV38	WDR18	-0.324709	-0.224566	0.151738	-1.55785	0.11927	0.228299
P63151	PPP2R2A	-0.323658	-0.0811278	0.145117	-1.55744	0.119368	0.228299
Q9P121	NTM	-0.314005	-0.241815	0.118008	-1.55708	0.119453	0.228299
P12235	SLC25A4	-0.321668	-0.206635	0.206343	-1.55696	0.119482	0.228299
Q8NBU5	ATAD1	-0.319081	-0.217738	0.156615	-1.55673	0.119537	0.228299
O14908	GIPC1	-0.317333	-0.196261	0.108561	-1.55669	0.119544	0.228299
Q15785	TOMM34	-0.324014	-0.125599	0.218146	-1.55565	0.119792	0.228622
P13611	VCAN	-0.320531	-0.158168	0.133608	-1.55345	0.120316	0.229365
P10109	FDX1	-0.341792	-0.0150048	0.200022	-1.55336	0.120338	0.229365
Q15286	RAB35	-0.319684	-0.188732	0.147142	-1.55232	0.120586	0.229687
O94817	ATG12	-0.319172	-0.0471739	0.192892	-1.55119	0.120857	0.229967
Q9UJD0	RIMS3	-0.322233	-0.126608	0.205848	-1.55105	0.12089	0.229967
Q07866	KLC1	-0.322137	-0.088197	0.153136	-1.55002	0.121137	0.230188
P14923	JUP	-0.337211	-0.227325	0.061417	-1.54991	0.121164	0.230188
Q92561	PHYHIP	-0.322474	-0.108905	0.156678	-1.54954	0.121253	0.230207
P51570	GALK1	-0.321062	-0.0925179	0.182162	-1.54789	0.121649	0.230719
P43490	NAMPT	-0.319799	-0.146746	0.131994	-1.54776	0.121681	0.230719
O75335	PPFIA4	-0.328469	-0.185398	0.183058	-1.54729	0.121793	0.230783
P40429	RPL13A	-0.311503	-0.264355	0.143268	-1.54562	0.122198	0.231029
P57772	EEFSEC	-0.319526	-0.162495	0.157104	-1.54542	0.122246	0.231029
P23634	ATP2B4	-0.316443	-0.215957	0.150491	-1.54532	0.122269	0.231029
P53985	SLC16A1	-0.316041	-0.18504	0.10787	-1.5449	0.122371	0.231029
P40616	ARL1	-0.316268	-0.219177	0.153691	-1.54481	0.122394	0.231029
Q15437	SEC23B	-0.358186	-0.0859817	0.190497	-1.54479	0.122398	0.231029
P48507	GCLM	-0.319721	-0.138007	0.136013	-1.54441	0.122489	0.231052
P28066	PSMA5	-0.312416	-0.248201	0.143554	-1.54366	0.122672	0.231248
Q9NUB1	ACSS1	-0.317348	-0.0254666	0.156632	-1.54069	0.123393	0.232321
Q99523	SORT1	-0.308969	-0.259482	0.0757509	-1.5405	0.123439	0.232321
O14910	LIN7A	-0.319711	-0.132957	0.224841	-1.54033	0.12348	0.232321
Q9Y285	FARSA	-0.316401	-0.227285	0.180171	-1.53966	0.123645	0.232412
O75431	MTX2	-0.314457	-0.241338	0.172819	-1.53948	0.123689	0.232412
P50993	ATP1A2	-0.311402	-0.247121	0.141099	-1.53899	0.123807	0.232412
Q15631	TSN	-0.348466	-0.0512476	0.219642	-1.53883	0.123847	0.232412
O60783	MRPS14	-0.32351	-0.224036	0.131298	-1.5379	0.124074	0.232688
P55036	PSMD4	-0.319401	-0.111753	0.186638	-1.53735	0.124209	0.232693
Q8NDI1	EHBP1	-0.322429	-0.12125	0.228669	-1.53724	0.124236	0.232693
Q9GZZ9	UBA5	-0.319512	-0.110872	0.169595	-1.53608	0.124519	0.233075
P00387	CYB5R3	-0.328345	-0.183647	0.113588	-1.53569	0.124616	0.233106
Q8TCS8	PNPT1	-0.328108	-0.141604	0.141079	-1.53463	0.124875	0.233388
Q8N111	CEND1	-0.315456	-0.227569	0.183559	-1.53421	0.12498	0.233388
P17600	SYN1	-0.31652	-0.189038	0.173831	-1.53381	0.125078	0.233388
P17677	GAP43	-0.310185	-0.229393	0.116342	-1.53377	0.125087	0.233388
O75899	GABBR2	-0.310801	-0.246219	0.14929	-1.53287	0.125308	0.233429
Q7L5D6	GET4	-0.318852	-0.140297	0.2042	-1.53274	0.125342	0.233429
P45880	VDAC2	-0.31321	-0.23934	0.171954	-1.53271	0.125348	0.233429
P31150	GDI1	-0.314974	-0.161415	0.103842	-1.53093	0.125788	0.233967
P59998	ARPC4	-0.318004	-0.130508	0.152612	-1.53089	0.125797	0.233967
Q8N3F0	MTURN	-0.337752	-0.0176348	0.187307	-1.53052	0.125888	0.233987
Q9UHG2	PCSK1N	-0.306943	-0.245605	0.0735635	-1.5299	0.126043	0.234126
Q8TF44	C2CD4C	-0.306664	-0.307446	0.126865	-1.52931	0.126188	0.234221
Q9P0K1	ADAM22	-0.31511	-0.198961	0.169369	-1.52904	0.126255	0.234221
Q8WWM7	ATXN2L	-0.331147	-0.166181	0.166622	-1.52791	0.126536	0.234339
Q10713	PMPCA	-0.354785	-0.0805085	0.178616	-1.52776	0.126572	0.234339
P62760	VSNL1	-0.311902	-0.201942	0.121427	-1.52775	0.126577	0.234339
P49069	CAMLG	-0.335804	-0.175191	0.174652	-1.52749	0.126639	0.234339
Q9UEY8	ADD3	-0.317194	-0.0992342	0.16947	-1.52654	0.126875	0.234602
A0A0B4J2D5	GATD3B	-0.311406	-0.135258	0.0384051	-1.52504	0.12725	0.234602
Q9Y265	RUVBL1	-0.31675	-0.160702	0.189759	-1.52498	0.127266	0.234602
Q8TEA8	DTD1	-0.3148	-0.177992	0.163295	-1.52495	0.127274	0.234602
Q8TB36	GDAP1	-0.314594	-0.160964	0.135377	-1.52492	0.12728	0.234602
P01023	A2M	-0.305375	-0.262889	0.0301689	-1.52471	0.127332	0.234602
P31146	CORO1A	-0.313633	-0.0645401	0.216908	-1.52466	0.127344	0.234602
Q96T83	SLC9A7	-0.330258	-0.053718	0.164312	-1.52408	0.127491	0.234725
P21912	SDHB	-0.305385	-0.260371	0.0752533	-1.52269	0.127838	0.235216
P15880	RPS2	-0.305265	-0.266706	0.0989051	-1.52158	0.128116	0.235578
Q8IZS8	CACNA2D3	-0.325012	-0.248342	0.170008	-1.52036	0.128421	0.235991
O43933	PEX1	-0.326692	-0.17673	0.144122	-1.51993	0.12853	0.236043
Q9NXA8	SIRT5	-0.315911	-0.093373	0.126431	-1.51824	0.128955	0.236673
P25685	DNAJB1	-0.312207	-0.188178	0.137888	-1.51735	0.129178	0.236907
Q15746	MYLK	-0.346907	-0.0967668	0.182635	-1.51709	0.129244	0.236907
O60884	DNAJA2	-0.304439	-0.242884	0.0878482	-1.51633	0.129436	0.237047
Q92828	CORO2A	-0.315392	-0.142976	0.186299	-1.51592	0.129541	0.237047
Q96GY0	ZC2HC1A	-0.315427	-0.134808	0.182293	-1.51583	0.129564	0.237047
Q96I59	NARS2	-0.329638	0.0240476	0.304318	-1.51535	0.129685	0.237119
P22681	CBL	-0.333878	-0.0635382	0.1605	-1.51491	0.129797	0.237176
O94905	ERLIN2	-0.314619	-0.140741	0.200383	-1.51207	0.130518	0.238344
P61160	ACTR2	-0.311586	-0.169899	0.139098	-1.51134	0.130703	0.238479
O15031	PLXNB2	-0.314193	-0.0926167	0.152697	-1.51114	0.130755	0.238479
P52788	SMS	-0.313232	-0.0276932	0.105162	-1.51077	0.130849	0.238502
Q9NRG7	SDR39U1	-0.312335	-0.0708964	0.181908	-1.5102	0.130994	0.238617
O00203	AP3B1	-0.324296	-0.0834008	0.112344	-1.50928	0.131229	0.238896
Q9BY44	EIF2A	-0.3129	-0.154085	0.170857	-1.50844	0.131443	0.239136
Q8NC96	NECAP1	-0.312864	-0.119427	0.209919	-1.50761	0.131656	0.239227
Q9NP80	PNPLA8	-0.336257	-0.20582	0.157323	-1.5074	0.13171	0.239227
P13645	KRT10	-0.303589	-0.253233	0.125828	-1.50727	0.131743	0.239227
P43378	PTPN9	-0.313176	-0.179567	0.21998	-1.5067	0.13189	0.239227
Q6Y1H2	HACD2	-0.311881	-0.173105	0.179585	-1.50665	0.131903	0.239227
Q13151	HNRNPA0	-0.317461	-0.2264	0.116496	-1.50394	0.132598	0.240236
O95670	ATP6V1G2	-0.310622	-0.204155	0.201202	-1.50384	0.132624	0.240236
P62701	RPS4X	-0.302571	-0.224343	0.0857303	-1.50315	0.132803	0.240411
Q9Y2K9	STXBP5L	-0.308189	-0.0679971	0.249403	-1.50271	0.132914	0.240415
P62873	GNB1	-0.310491	-0.172233	0.165227	-1.5025	0.132969	0.240415
Q9Y6A4	CFAP20	-0.310813	-0.062254	0.161772	-1.50116	0.133315	0.240752
Q6ZMI0	PPP1R21	-0.311158	-0.0865487	0.179481	-1.50083	0.133402	0.240752
P13489	RNH1	-0.310879	-0.0293379	0.116644	-1.50082	0.133403	0.240752
P21796	VDAC1	-0.308129	-0.228666	0.179421	-1.50009	0.133592	0.240851
O95816	BAG2	-0.329845	-0.194775	0.119267	-1.49997	0.133623	0.240851
Q9NUL3	STAU2	-0.330002	-0.244604	0.239055	-1.49894	0.133891	0.240968
P13010	XRCC5	-0.300466	-0.250513	0.0430419	-1.49886	0.13391	0.240968
Q00587	CDC42EP1	-0.3244	-0.159564	0.084452	-1.49877	0.133935	0.240968
P23284	PPIB	-0.31112	-0.149637	0.179868	-1.49722	0.134337	0.241541
Q14344	GNA13	-0.31112	-0.113506	0.13696	-1.49682	0.134441	0.241552
Q8NBF6	AVL9	-0.309566	-0.149723	0.144584	-1.49656	0.134508	0.241552
Q9BVV7	TIMM21	-0.321462	-0.116903	0.188293	-1.49593	0.134673	0.24158
Q14789	GOLGB1	-0.327763	-0.184201	0.193916	-1.49587	0.134689	0.24158
P52209	PGD	-0.304157	-0.192292	0.096038	-1.49496	0.134925	0.241796
Q9UBQ5	EIF3K	-0.308748	-0.0491979	0.164688	-1.49477	0.134975	0.241796
P67936	TPM4	-0.310484	-0.160854	0.193853	-1.49418	0.13513	0.241926
P24752	ACAT1	-0.306917	-0.207666	0.156329	-1.49329	0.135362	0.242191
Q8NFZ4	NLGN2	-0.334996	-0.188191	0.167684	-1.49256	0.135554	0.242253
Q9HB90	RRAGC	-0.307972	-0.102249	0.239077	-1.49253	0.135562	0.242253
Q8N766	EMC1	-0.308417	-0.18058	0.179311	-1.49179	0.135756	0.242452
Q969S9	GFM2	-0.328135	-0.237726	0.208804	-1.49	0.136224	0.243106
P12956	XRCC6	-0.29815	-0.283147	0.0215379	-1.48976	0.136289	0.243106
P26373	RPL13	-0.301745	-0.240987	0.139932	-1.48915	0.136449	0.243243
P25398	RPS12	-0.307417	-0.180905	0.173615	-1.48805	0.136739	0.24361
Q92930	RAB8B	-0.307621	-0.157348	0.153189	-1.48735	0.136924	0.243791
Q9HD33	MRPL47	-0.306295	-0.187051	0.158732	-1.48586	0.137318	0.244171
P82930	MRPS34	-0.305214	-0.208386	0.154896	-1.48564	0.137374	0.244171
O43447	PPIH	-0.319007	-0.0197924	0.204305	-1.48559	0.137388	0.244171
Q6PCE3	PGM2L1	-0.331565	-0.189107	0.154306	-1.48445	0.137691	0.244561
P53396	ACLY	-0.308625	-0.0723639	0.11904	-1.48358	0.137921	0.244744
P14868	DARS1	-0.30778	-0.10024	0.188403	-1.48343	0.137962	0.244744
Q6P1K1	SLC48A1	-0.324477	-0.149117	0.125744	-1.48178	0.1384	0.245372
Q9Y2V2	CARHSP1	-0.307498	-0.0969093	0.17415	-1.48082	0.138656	0.245654
P09525	ANXA4	-0.304543	-0.187614	0.135547	-1.48055	0.138727	0.245654
Q13825	AUH	-0.304846	-0.212431	0.183888	-1.47946	0.139018	0.245997
Q15046	KARS1	-0.30407	-0.0666003	0.224854	-1.47904	0.139131	0.245997
P15882	CHN1	-0.305498	-0.140104	0.123131	-1.47864	0.139238	0.245997
Q7Z5B4	RIC3	-0.316695	-0.203278	0.204302	-1.47856	0.139258	0.245997
Q96PQ0	SORCS2	-0.337269	-0.205625	0.134622	-1.4777	0.139489	0.246256
Q8NBX0	SCCPDH	-0.301462	-0.203136	0.121053	-1.47734	0.139586	0.246279
P23786	CPT2	-0.306619	-0.0606279	0.123518	-1.47596	0.139956	0.246663
Q9NTG7	SIRT3	-0.311734	0.0485646	0.232995	-1.4759	0.139973	0.246663
Q9ULU8	CADPS	-0.302243	-0.0215645	0.187811	-1.4732	0.140699	0.247529
Q9Y4D2	DAGLA	-0.31686	-0.185513	0.233308	-1.47287	0.140787	0.247529
O94925	GLS	-0.306368	-0.119784	0.158	-1.47247	0.140896	0.247529
P25789	PSMA4	-0.302033	-0.203583	0.142155	-1.47238	0.140919	0.247529
Q9UI40	SLC24A2	-0.300314	-0.207608	0.126676	-1.47171	0.1411	0.247529
Q8N1B4	VPS52	-0.303189	-0.162308	0.118886	-1.47162	0.141125	0.247529
P10515	DLAT	-0.303523	-0.203679	0.187374	-1.47147	0.141164	0.247529
Q8N128	FAM177A1	-0.340217	-0.103467	0.153865	-1.47141	0.141182	0.247529
P84074	HPCA	-0.317416	-0.217833	0.119713	-1.47061	0.141398	0.247529
Q08554	DSC1	-0.294839	-0.2483	0.0516418	-1.47037	0.141461	0.247529
Q15369	ELOC	-0.305772	-0.0983968	0.128636	-1.46986	0.1416	0.247529
Q96GK7	FAHD2A	-0.315535	-0.0650568	0.172732	-1.46951	0.141695	0.247529
O60826	CCDC22	-0.326644	-0.051744	0.18317	-1.46938	0.14173	0.247529
Q66LE6	PPP2R2D	-0.304711	-0.0777056	0.160511	-1.46869	0.141919	0.247529
P11171	EPB41	-0.316008	-0.188795	0.129605	-1.46851	0.141966	0.247529
O75381	PEX14	-0.301795	-0.209885	0.158888	-1.46843	0.141988	0.247529
P51553	IDH3G	-0.301419	-0.0332244	0.19726	-1.46838	0.142003	0.247529
Q8TCE6	DENND10	-0.337965	-0.0574963	0.200414	-1.46835	0.142011	0.247529
Q9UI12	ATP6V1H	-0.302251	-0.21429	0.176942	-1.46796	0.142115	0.247529
P07203	GPX1	-0.303851	-0.140036	0.138339	-1.4678	0.14216	0.247529
Q70YC5	ZNF365	-0.314259	-0.2461	0.143478	-1.46686	0.142416	0.247806
P52815	MRPL12	-0.320518	-0.234595	0.155983	-1.46659	0.142489	0.247806
P61313	RPL15	-0.294754	-0.250534	0.110043	-1.46617	0.142604	0.247859
Q16774	GUK1	-0.302127	-0.173641	0.139561	-1.46586	0.142688	0.247859
Q2M389	WASHC4	-0.300313	-0.0431931	0.222778	-1.46501	0.142919	0.248111
Q9NZ43	USE1	-0.304548	-0.218116	0.182255	-1.462	0.143743	0.249305
P38646	HSPA9	-0.30326	-0.106101	0.197649	-1.46187	0.143777	0.249305
Q9GZN7	ROGDI	-0.302971	-0.181905	0.201656	-1.46136	0.143916	0.249398
Q9NVT9	ARMC1	-0.295415	-0.228739	0.115723	-1.46068	0.144105	0.249576
Q9NUV9	GIMAP4	-0.321812	-0.138065	0.187294	-1.46024	0.144225	0.249636
O60313	OPA1	-0.297521	-0.23366	0.156553	-1.4591	0.144538	0.25003
Q53H96	PYCR3	-0.332526	-0.190869	0.151482	-1.4568	0.145172	0.250978
P25686	DNAJB2	-0.296739	-0.222221	0.139961	-1.45612	0.145359	0.251121
Q01433	AMPD2	-0.309784	-0.124345	0.174626	-1.45561	0.145502	0.251121
P37837	TALDO1	-0.29197	-0.23706	0.0532029	-1.45557	0.145512	0.251121
P18085	ARF4	-0.299469	-0.178422	0.136385	-1.45389	0.145978	0.251776
P00441	SOD1	-0.291194	-0.229081	0.0118886	-1.4528	0.146281	0.25215
Q9H313	TTYH1	-0.320369	-0.267537	0.088293	-1.45177	0.146566	0.252492
Q9HCH3	CPNE5	-0.291508	-0.247492	0.107487	-1.44979	0.147118	0.253212
Q9P2Y5	UVRAG	-0.318984	-0.222611	0.121302	-1.44965	0.147158	0.253212
Q9Y2T3	GDA	-0.299247	-0.221678	0.226357	-1.44824	0.14755	0.253737
O75110	ATP9A	-0.301106	-0.153923	0.225246	-1.44772	0.147695	0.253838
O43242	PSMD3	-0.299034	-0.0819732	0.201937	-1.44702	0.147893	0.254028
Q9Y3C0	WASHC3	-0.325846	-0.101746	0.143921	-1.44503	0.148452	0.254741
P11940	PABPC1	-0.297903	-0.206026	0.186835	-1.44468	0.148548	0.254741
Q96AG3	SLC25A46	-0.305243	-0.219346	0.175955	-1.44452	0.148594	0.254741
Q13424	SNTA1	-0.300423	-0.077327	0.127247	-1.44429	0.148657	0.254741
P32119	PRDX2	-0.29535	-0.209858	0.144665	-1.44166	0.1494	0.255295
O75475	PSIP1	-0.289112	-0.254673	0.0731567	-1.44139	0.149476	0.255295
Q5T440	IBA57	-0.335341	-0.178939	0.216219	-1.44134	0.14949	0.255295
P34932	HSPA4	-0.293742	-0.18363	0.0921674	-1.44117	0.149537	0.255295
P07099	EPHX1	-0.288978	-0.255965	0.0655908	-1.44101	0.149584	0.255295
P61026	RAB10	-0.290281	-0.225432	0.0917929	-1.44099	0.149588	0.255295
Q8IYB5	SMAP1	-0.29975	-0.102207	0.142255	-1.44047	0.149735	0.255295
Q08722	CD47	-0.296089	-0.221518	0.174286	-1.44046	0.149739	0.255295
Q8NEZ2	VPS37A	-0.329961	-0.156679	0.13894	-1.44016	0.149824	0.255295
P61604	HSPE1	-0.295088	-0.182048	0.110726	-1.44005	0.149855	0.255295
Q9Y6C9	MTCH2	-0.296881	-0.195702	0.174237	-1.43968	0.149959	0.255324
P21281	ATP6V1B2	-0.297001	-0.197437	0.191965	-1.43803	0.150428	0.255973
Q9Y512	SAMM50	-0.29038	-0.251094	0.139643	-1.43701	0.150717	0.25631
P47755	CAPZA2	-0.290354	-0.232811	0.119052	-1.43618	0.150953	0.25631
O43175	PHGDH	-0.297032	-0.0310111	0.131379	-1.43612	0.150969	0.25631
P04156	PRNP	-0.292806	-0.206685	0.122397	-1.43609	0.150977	0.25631
Q6P996	PDXDC1	-0.314686	-0.254898	0.144986	-1.43526	0.151213	0.256561
Q9UHV9	PFDN2	-0.295865	-0.071987	0.201721	-1.43397	0.151583	0.256926
O00330	PDHX	-0.295306	-0.223248	0.191418	-1.43383	0.151621	0.256926
Q8WWC4	MAIP1	-0.294056	-0.0350234	0.202658	-1.43298	0.151863	0.256926
Q96HS1	PGAM5	-0.289795	-0.254137	0.147935	-1.43279	0.151918	0.256926
P40121	CAPG	-0.29645	-0.0284603	0.123712	-1.43251	0.151998	0.256926
P60981	DSTN	-0.293512	-0.00962603	0.184536	-1.43245	0.152016	0.256926
Q01518	CAP1	-0.295189	-0.149038	0.10843	-1.43222	0.152082	0.256926
P62273	RPS29	-0.31421	-0.263473	0.0685099	-1.43164	0.152247	0.256926
Q6P995	FAM171B	-0.309784	-0.171235	0.181812	-1.43144	0.152306	0.256926
P06730	EIF4E	-0.29767	-0.116937	0.177401	-1.43109	0.152405	0.256926
P18507	GABRG2	-0.286994	-0.28724	0.122687	-1.43057	0.152555	0.256926
Q00325	SLC25A3	-0.293937	-0.215518	0.165097	-1.43042	0.152597	0.256926
Q3SXM5	HSDL1	-0.295596	-0.185734	0.183595	-1.43018	0.152668	0.256926
Q99943	AGPAT1	-0.29107	-0.193689	0.0998225	-1.42993	0.152739	0.256926
Q96HY6	DDRGK1	-0.286729	-0.224092	0.0222957	-1.4299	0.152748	0.256926
Q5SWX8	ODR4	-0.334808	-0.0361683	0.169697	-1.42934	0.152908	0.257048
P52306	RAP1GDS1	-0.293335	-0.00210482	0.149493	-1.42769	0.153383	0.257568
Q13505	MTX1	-0.293343	-0.2202	0.170535	-1.42765	0.153394	0.257568
O94919	ENDOD1	-0.294772	-0.123657	0.105802	-1.42617	0.153821	0.258137
Q96H20	SNF8	-0.29191	-0.177825	0.10252	-1.42556	0.153998	0.258194
Q9BTE1	DCTN5	-0.310525	-0.104326	0.163027	-1.42544	0.154032	0.258194
Q16890	TPD52L1	-0.299763	-0.204595	0.117985	-1.42435	0.154345	0.258571
P0DOY2	IGLC2	-0.284856	-0.284471	0.0236042	-1.42332	0.154644	0.258922
Q9Y570	PPME1	-0.292892	-0.0192113	0.151329	-1.42238	0.154916	0.259044
A8MXV4	NUDT19	-0.326156	-0.18443	0.124535	-1.42237	0.15492	0.259044
P13647	KRT5	-0.28673	-0.223045	0.0933145	-1.42215	0.154983	0.259044
Q8N6H7	ARFGAP2	-0.294458	-0.162687	0.171942	-1.4214	0.1552	0.259237
P15954	COX7C	-0.307261	-0.235466	0.190979	-1.42107	0.155297	0.259237
P13473	LAMP2	-0.291647	-0.189048	0.0669129	-1.42084	0.155365	0.259237
O75323	NIPSNAP2	-0.294883	-0.0769717	0.152125	-1.42042	0.155485	0.25929
P31942	HNRNPH3	-0.290374	-0.200646	0.126994	-1.41961	0.155723	0.259538
Q5T2T1	MPP7	-0.288485	-0.199793	0.104407	-1.4183	0.156106	0.260028
Q9BWS9	CHID1	-0.291911	-0.1924	0.14963	-1.41772	0.156272	0.260088
P23246	SFPQ	-0.29241	-0.118992	0.262557	-1.41756	0.15632	0.260088
P31949	S100A11	-0.310771	-0.18258	0.0642612	-1.41696	0.156495	0.260091
P10412	H1-4	-0.285411	-0.206502	0.0682251	-1.41677	0.15655	0.260091
Q15349	RPS6KA2	-0.294798	-0.0794689	0.12102	-1.41664	0.156589	0.260091
Q9Y6N8	CDH10	-0.303327	-0.241809	0.130047	-1.41502	0.157064	0.260732
P48729	CSNK1A1	-0.285788	-0.226524	0.116707	-1.41198	0.157957	0.261933
P07711	CTSL	-0.32005	-0.231234	0.196796	-1.41195	0.157967	0.261933
Q86YQ8	CPNE8	-0.288498	-0.233968	0.169921	-1.41003	0.158532	0.262502
O00499	BIN1	-0.291694	-0.137426	0.130494	-1.40992	0.158565	0.262502
O00308	WWP2	-0.311206	-0.191979	0.159412	-1.40965	0.158644	0.262502
P31323	PRKAR2B	-0.291963	-0.0803898	0.18113	-1.40956	0.15867	0.262502
P07355	ANXA2	-0.288629	-0.153012	0.0766151	-1.40774	0.15921	0.263247
P54577	YARS1	-0.292104	-0.0688654	0.145156	-1.40742	0.159305	0.263255
Q96PB7	OLFM3	-0.282113	-0.288959	0.135913	-1.40588	0.159762	0.263861
P55209	NAP1L1	-0.289431	-0.041382	0.177289	-1.40527	0.159942	0.26399
Q9NZ01	TECR	-0.292308	-0.150363	0.201238	-1.40474	0.160099	0.26399
Q12792	TWF1	-0.318355	-0.0978148	0.115998	-1.40386	0.160361	0.26399
P61421	ATP6V0D1	-0.290606	-0.204993	0.220378	-1.40372	0.160404	0.26399
P78362	SRPK2	-0.311088	-0.186257	0.114005	-1.4035	0.160469	0.26399
P35268	RPL22	-0.281424	-0.272536	0.0913262	-1.40319	0.160561	0.26399
Q6UXN9	WDR82	-0.292699	-0.129722	0.149407	-1.40299	0.160621	0.26399
Q96BQ5	CCDC127	-0.287942	-0.199682	0.139537	-1.40293	0.160639	0.26399
Q15773	MLF2	-0.287568	-0.20926	0.14648	-1.40281	0.160674	0.26399
Q5JVS0	HABP4	-0.30072	-0.281067	0.138612	-1.40218	0.160862	0.26399
P53041	PPP5C	-0.292722	-0.0119839	0.163362	-1.40211	0.160884	0.26399
Q53H12	AGK	-0.282735	-0.246476	0.124017	-1.40197	0.160925	0.26399
O15083	ERC2	-0.28397	-0.235402	0.134891	-1.4008	0.161274	0.264413
A2RTX5	TARS3	-0.317153	-0.110163	0.0837191	-1.39961	0.16163	0.264813
Q96I99	SUCLG2	-0.284454	0.020325	0.208397	-1.39938	0.161699	0.264813
O75396	SEC22B	-0.290699	-0.091734	0.158729	-1.39888	0.161851	0.264824
P08247	SYP	-0.281312	-0.248669	0.11086	-1.39876	0.161888	0.264824
Q8TBM8	DNAJB14	-0.282909	-0.237408	0.131122	-1.39754	0.162252	0.265199
Q13617	CUL2	-0.294116	-0.0641359	0.0906347	-1.39739	0.162298	0.265199
A6NMT0	DBX1	-0.313874	-0.211167	0.195192	-1.39648	0.162572	0.265498
Q9Y5X3	SNX5	-0.289757	-0.0508882	0.118661	-1.39565	0.162821	0.265756
P04271	S100B	-0.30883	-0.109703	0.0723907	-1.39446	0.16318	0.266192
Q12860	CNTN1	-0.282799	-0.227364	0.128086	-1.39399	0.163321	0.266274
Q96BJ3	AIDA	-0.312451	-0.038397	0.137354	-1.3936	0.163439	0.266317
Q9UH65	SWAP70	-0.285995	0.0028225	0.149182	-1.39282	0.163674	0.266523
Q9BQ95	ECSIT	-0.297838	-0.188242	0.151247	-1.39208	0.163899	0.266523
P20618	PSMB1	-0.319375	-0.149655	0.166977	-1.39202	0.163919	0.266523
Q6P9B6	MEAK7	-0.285021	-0.211828	0.145026	-1.39198	0.16393	0.266523
Q99758	ABCA3	-0.314458	-0.172703	0.165415	-1.3907	0.164318	0.267005
Q9C0E8	LNPK	-0.286467	-0.0416404	0.164235	-1.38853	0.164977	0.267807
Q93009	USP7	-0.287279	-0.0600973	0.163653	-1.38824	0.165066	0.267807
Q9Y2T4	PPP2R2C	-0.289993	-0.262011	0.0440104	-1.38817	0.165086	0.267807
Q9H9J2	MRPL44	-0.310309	-0.232904	0.144838	-1.38652	0.16559	0.268375
P50148	GNAQ	-0.288428	-0.100491	0.135364	-1.38616	0.165699	0.268375
Q13011	ECH1	-0.281977	-0.208559	0.115949	-1.38612	0.165713	0.268375
O95057	DIRAS1	-0.279856	-0.236659	0.121188	-1.38502	0.166046	0.268766
P27105	STOM	-0.285676	-0.182598	0.164044	-1.38456	0.166189	0.268775
Q96BW9	TAMM41	-0.279098	-0.232915	0.105317	-1.38441	0.166235	0.268775
P01024	C3	-0.273951	0.118101	0.278376	-1.38345	0.166529	0.2691
P62851	RPS25	-0.278506	-0.237147	0.104443	-1.383	0.166667	0.269106
O75886	STAM2	-0.315009	-0.0849846	0.205419	-1.38284	0.166716	0.269106
Q99497	PARK7	-0.279475	-0.218236	0.101236	-1.38223	0.166901	0.269168
P21283	ATP6V1C1	-0.285385	-0.189403	0.179837	-1.38211	0.16694	0.269168
P09651	HNRNPA1	-0.281105	-0.184015	0.0871041	-1.38117	0.167229	0.26941
Q9HAD4	WDR41	-0.284334	-0.183728	0.137978	-1.38102	0.167274	0.26941
Q9Y696	CLIC4	-0.286583	-0.0330324	0.0961341	-1.38035	0.16748	0.269423
Q02878	RPL6	-0.276927	-0.260184	0.0971945	-1.38011	0.167553	0.269423
Q9H1E5	TMX4	-0.285658	-0.0975008	0.20869	-1.38009	0.167559	0.269423
Q9HAB8	PPCS	-0.30863	0.0831838	0.145837	-1.37969	0.167682	0.269473
P00558	PGK1	-0.285706	-0.109257	0.10506	-1.37912	0.167859	0.269609
Q9NPD7	NRN1	-0.281593	-0.197749	0.119454	-1.37809	0.168176	0.269642
P68036	UBE2L3	-0.292373	-0.166183	0.102061	-1.37805	0.168189	0.269642
Q8TBF8	FAM81A	-0.293391	-0.288222	0.162786	-1.378	0.168203	0.269642
Q86TX2	ACOT1	-0.279184	0.0290369	0.219235	-1.37785	0.168249	0.269642
Q9NX00	TMEM160	-0.30163	-0.218824	0.173273	-1.37471	0.169222	0.271053
Q9BW92	TARS2	-0.304531	-0.139129	0.179251	-1.37362	0.16956	0.271071
Q16540	MRPL23	-0.304688	-0.191829	0.133794	-1.3732	0.169692	0.271071
P61019	RAB2A	-0.289297	-0.196922	0.113099	-1.3729	0.169783	0.271071
P23515	OMG	-0.279876	-0.189916	0.100754	-1.37289	0.169789	0.271071
P82914	MRPS15	-0.298741	-0.212673	0.156139	-1.37275	0.169832	0.271071
P12081	HARS1	-0.280678	-0.00554329	0.197848	-1.37272	0.16984	0.271071
Q9C0C9	UBE2O	-0.277389	0.0377713	0.226011	-1.37258	0.169884	0.271071
P09471	GNAO1	-0.282807	-0.163425	0.13673	-1.37106	0.170358	0.271363
Q86WA6	BPHL	-0.280541	-0.00175004	0.186627	-1.37101	0.170373	0.271363
Q8IUH3	RBM45	-0.295667	-0.247945	0.157113	-1.36999	0.170692	0.271363
P53999	SUB1	-0.284991	-0.149445	0.215049	-1.36992	0.170712	0.271363
P08758	ANXA5	-0.282262	-0.107775	0.0541935	-1.36971	0.170778	0.271363
Q12983	BNIP3	-0.275497	-0.23057	0.0900804	-1.36941	0.170871	0.271363
P08708	RPS17	-0.279878	-0.199865	0.123353	-1.36926	0.17092	0.271363
O14656	TOR1A	-0.293842	-0.126463	0.202229	-1.36921	0.170936	0.271363
O75438	NDUFB1	-0.295749	-0.1867	0.187364	-1.36908	0.170975	0.271363
O75077	ADAM23	-0.278268	-0.199005	0.100909	-1.3689	0.17103	0.271363
P46940	IQGAP1	-0.315636	-0.106245	0.118362	-1.36842	0.171182	0.271363
P39023	RPL3	-0.278209	-0.22351	0.132828	-1.36823	0.171242	0.271363
O43572	AKAP10	-0.307974	-0.255088	0.197139	-1.36795	0.17133	0.271363
P62917	RPL8	-0.27559	-0.237948	0.108576	-1.36783	0.171368	0.271363
Q6UXD5	SEZ6L2	-0.283016	-0.171491	0.177347	-1.36724	0.17155	0.271445
O75083	WDR1	-0.282111	-0.0168876	0.131191	-1.36707	0.171605	0.271445
Q9Y3D6	FIS1	-0.281583	-0.166293	0.126955	-1.36648	0.17179	0.271591
P23396	RPS3	-0.276299	-0.224147	0.11227	-1.36551	0.172095	0.271925
Q08209	PPP3CA	-0.279785	-0.208151	0.143987	-1.36521	0.172189	0.271927
Q7Z6G3	NECAB2	-0.296186	-0.245033	0.196193	-1.36453	0.172402	0.272116
P62913	RPL11	-0.273659	-0.253082	0.0771749	-1.36417	0.172515	0.272146
O94772	LY6H	-0.277161	-0.211565	0.120104	-1.36232	0.173099	0.272921
O14907	TAX1BP3	-0.299486	-0.0981757	0.0876898	-1.36053	0.173662	0.273615
P53677	AP3M2	-0.280347	-0.0655359	0.202701	-1.36033	0.173727	0.273615
Q8NEB9	PIK3C3	-0.301616	-0.189142	0.127115	-1.35975	0.173909	0.273754
Q9H299	SH3BGRL3	-0.281073	-0.103864	0.0839834	-1.35935	0.174036	0.273806
Q01844	EWSR1	-0.299419	-0.238424	0.0842284	-1.35874	0.174229	0.273962
P21964	COMT	-0.279977	-0.0158683	0.133953	-1.35743	0.174645	0.274382
Q13148	TARDBP	-0.271878	-0.286381	0.0633775	-1.35731	0.174683	0.274382
P08243	ASNS	-0.271853	-0.290821	0.0854412	-1.35646	0.174953	0.274657
Q9NP72	RAB18	-0.275778	-0.213678	0.122943	-1.35546	0.175273	0.275001
P29074	PTPN4	-0.30401	-0.182005	0.185317	-1.35518	0.17536	0.275001
O95299	NDUFA10	-0.281449	-0.161173	0.198597	-1.3538	0.1758	0.275476
Q8N573	OXR1	-0.280444	-0.0862422	0.186492	-1.35364	0.175852	0.275476
Q9H9A6	LRRC40	-0.278207	-0.0447828	0.195931	-1.35301	0.176053	0.275644
Q8TB22	SPATA20	-0.31087	-0.108643	0.14275	-1.35012	0.17698	0.27687
Q9Y697	NFS1	-0.28014	-0.0663632	0.143769	-1.34997	0.177026	0.27687
P07919	UQCRH	-0.280758	-0.118953	0.177596	-1.34963	0.177136	0.276892
P54920	NAPA	-0.278224	-0.162492	0.131642	-1.34932	0.177237	0.276892
Q9UHW9	SLC12A6	-0.290243	-0.121984	0.172768	-1.34875	0.177417	0.276892
Q567U6	CCDC93	-0.27808	-0.00492589	0.203599	-1.34823	0.177586	0.276892
P31939	ATIC	-0.278467	-0.0283965	0.138689	-1.34819	0.1776	0.276892
P62879	GNB2	-0.277353	-0.0162304	0.155368	-1.34816	0.177609	0.276892
P83731	RPL24	-0.270491	-0.247341	0.0872922	-1.34778	0.17773	0.276932
Q8NF37	LPCAT1	-0.277828	-0.0416934	0.167746	-1.34725	0.177902	0.277004
O60883	GPR37L1	-0.304505	-0.188454	0.160874	-1.34705	0.177966	0.277004
Q9BZ23	PANK2	-0.291978	-0.0647962	0.14991	-1.34666	0.17809	0.277051
O15372	EIF3H	-0.27895	-0.0580026	0.147745	-1.346	0.178303	0.277234
P27348	YWHAQ	-0.277357	-0.0104605	0.132395	-1.34562	0.178425	0.277276
O14548	COX7A2L	-0.276632	-0.213874	0.176502	-1.34353	0.179102	0.27808
O43581	SYT7	-0.27659	-0.215995	0.178232	-1.34343	0.179133	0.27808
Q96E11	MRRF	-0.303521	-0.138888	0.216326	-1.34209	0.179568	0.278607
Q96BM9	ARL8A	-0.278231	-0.118436	0.13062	-1.34051	0.18008	0.279066
Q9UGV2	NDRG3	-0.290251	-0.18594	0.184359	-1.34045	0.180102	0.279066
Q9H0Q0	CYRIA	-0.276404	-0.0317762	0.155012	-1.3403	0.18015	0.279066
Q8N9F7	GDPD1	-0.278053	-0.11212	0.179997	-1.33759	0.18103	0.280148
Q8NB37	GATD1	-0.290928	-0.132886	0.155085	-1.33701	0.181221	0.280148
Q9NYB9	ABI2	-0.2696	-0.24748	0.124768	-1.33698	0.181231	0.280148
Q8WUX9	CHMP7	-0.300372	-0.0339693	0.151801	-1.33697	0.181233	0.280148
P62249	RPS16	-0.269705	-0.227059	0.107803	-1.33515	0.181827	0.280919
P13716	ALAD	-0.279444	-0.202351	0.0424309	-1.3342	0.182141	0.281254
Q9BXI3	NT5C1A	-0.283774	-0.121431	0.0908589	-1.33318	0.182472	0.281617
P51665	PSMD7	-0.275592	-0.0624938	0.169551	-1.33223	0.182786	0.281952
Q13232	NME3	-0.273391	-0.177924	0.114221	-1.33139	0.183061	0.282227
B3KU38	IQCJ-SCHIP1	-0.315994	-0.124496	0.185615	-1.33036	0.1834	0.282599
P62263	RPS14	-0.269609	-0.212762	0.106117	-1.33007	0.183496	0.282599
O60502	OGA	-0.276108	-0.10287	0.115625	-1.32953	0.183673	0.282723
P61626	LYZ	-0.270374	-0.190925	0.0945109	-1.32885	0.183898	0.28292
P51148	RAB5C	-0.26754	-0.232114	0.100087	-1.32812	0.184138	0.283141
Q99259	GAD1	-0.273257	-0.0450428	0.184639	-1.32717	0.184455	0.283378
P45985	MAP2K4	-0.271723	-0.0329326	0.219944	-1.32702	0.184504	0.283378
P62906	RPL10A	-0.269472	-0.214037	0.116247	-1.32678	0.184584	0.283378
Q02543	RPL18A	-0.266851	-0.234143	0.0959756	-1.32613	0.184797	0.283556
O43747	AP1G1	-0.272898	-0.0127588	0.145357	-1.32562	0.184968	0.283669
Q9BXI6	TBC1D10A	-0.283407	-0.193998	0.15891	-1.3241	0.185472	0.284293
O60762	DPM1	-0.271539	-0.208682	0.150428	-1.32314	0.185791	0.284632
Q96FJ2	DYNLL2	-0.269781	-0.181921	0.0923013	-1.32282	0.185897	0.284645
Q9Y5X2	SNX8	-0.299111	-0.114119	0.129049	-1.32188	0.18621	0.284975
Q969M7	UBE2F	-0.272818	-0.0102489	0.181996	-1.32018	0.186776	0.285692
Q96FW1	OTUB1	-0.270635	0.000736583	0.154811	-1.31844	0.187358	0.286123
P61966	AP1S1	-0.293326	-0.0204273	0.151989	-1.3184	0.187372	0.286123
Q9NR22	PRMT8	-0.271843	-0.160945	0.101431	-1.31801	0.187502	0.286123
Q07666	KHDRBS1	-0.282183	-0.242634	0.122921	-1.31749	0.187677	0.286123
P31943	HNRNPH1	-0.271051	-0.159891	0.102446	-1.31732	0.187734	0.286123
Q5VTE6	ANGEL2	-0.301771	-0.0872507	0.17371	-1.31731	0.187736	0.286123
P61225	RAP2B	-0.264409	-0.250219	0.0931547	-1.31729	0.187744	0.286123
Q96K76	USP47	-0.271392	-0.13024	0.085601	-1.3167	0.187942	0.286275
P49406	MRPL19	-0.294908	-0.194642	0.171613	-1.31612	0.188134	0.286419
Q6PML9	SLC30A9	-0.273654	-0.101056	0.15793	-1.31566	0.188289	0.286506
P26368	U2AF2	-0.277599	-0.0375692	0.234655	-1.31414	0.188801	0.287135
P09001	MRPL3	-0.267098	-0.231401	0.14229	-1.31372	0.18894	0.287197
P33176	KIF5B	-0.269365	-0.0306406	0.201027	-1.3132	0.189116	0.287261
Q8IUS5	EPHX4	-0.270045	-0.212954	0.166621	-1.31301	0.189179	0.287261
Q969Q5	RAB24	-0.263333	-0.23619	0.079987	-1.31155	0.189673	0.28763
Q8NI37	PPTC7	-0.294791	-0.0234068	0.210132	-1.31149	0.189694	0.28763
Q9NZN3	EHD3	-0.270107	-0.0226379	0.152082	-1.31118	0.189799	0.28763
Q96CW1	AP2M1	-0.272104	-0.153187	0.17346	-1.31113	0.189816	0.28763
P09622	DLD	-0.272278	-0.156662	0.192021	-1.30982	0.190258	0.288041
Q8IXB1	DNAJC10	-0.280817	-0.106627	0.118087	-1.30974	0.190284	0.288041
P61020	RAB5B	-0.263968	-0.233634	0.109767	-1.30842	0.190733	0.288548
Q13620	CUL4B	-0.292463	-0.181185	0.109044	-1.30817	0.190817	0.288548
Q8N126	CADM3	-0.263086	-0.225268	0.0872406	-1.30691	0.191244	0.288952
Q9GZY8	MFF	-0.264618	-0.227358	0.12085	-1.30651	0.191381	0.288952
Q9Y2H1	STK38L	-0.28481	-0.117401	0.164752	-1.30644	0.191406	0.288952
P63241	EIF5A	-0.270254	-0.0520179	0.153791	-1.306	0.191552	0.288952
Q12906	ILF3	-0.269306	-0.176432	0.150319	-1.30592	0.191579	0.288952
Q53HC9	EIPR1	-0.270003	-0.144056	0.143764	-1.30422	0.19216	0.289532
Q7LBR1	CHMP1B	-0.262182	-0.262112	0.0917305	-1.30418	0.192174	0.289532
Q9UGC6	RGS17	-0.268781	-0.161995	0.126702	-1.30392	0.192261	0.289532
Q12837	POU4F2	-0.28245	-0.160564	0.158631	-1.30338	0.192445	0.289641
Q16718	NDUFA5	-0.271063	-0.154738	0.198103	-1.30313	0.192532	0.289641
O14775	GNB5	-0.269674	-0.151786	0.15319	-1.30268	0.192684	0.289721
Q99584	S100A13	-0.270561	-0.149155	0.187893	-1.30101	0.193256	0.29043
P25713	MT3	-0.261028	-0.200146	0.0366874	-1.29991	0.193634	0.290732
P23528	CFL1	-0.26658	-0.00109534	0.164782	-1.29974	0.193691	0.290732
P25786	PSMA1	-0.262192	-0.230867	0.107466	-1.29931	0.19384	0.290732
P62244	RPS15A	-0.260453	-0.259585	0.0617311	-1.29902	0.193938	0.290732
P18124	RPL7	-0.260758	-0.243826	0.086583	-1.29897	0.193954	0.290732
P62166	NCS1	-0.261394	-0.214765	0.0777957	-1.29772	0.194384	0.291085
O00764	PDXK	-0.268666	-0.0544882	0.151029	-1.29745	0.194477	0.291085
O60869	EDF1	-0.29905	-0.191712	0.134536	-1.29742	0.194489	0.291085
Q13155	AIMP2	-0.266521	-0.0315322	0.17539	-1.29563	0.195105	0.291858
P60880	SNAP25	-0.267239	-0.150862	0.127169	-1.29485	0.195373	0.291924
Q9NYI0	PSD3	-0.268221	-0.148713	0.154615	-1.29472	0.195419	0.291924
P54764	EPHA4	-0.269405	-0.113621	0.164114	-1.29463	0.195449	0.291924
Q9Y281	CFL2	-0.267997	-0.0968076	0.0877204	-1.29394	0.195686	0.291927
P15170	GSPT1	-0.264578	0.0278804	0.155227	-1.29388	0.195708	0.291927
P46777	RPL5	-0.260364	-0.225371	0.0856273	-1.29376	0.195751	0.291927
Q9Y305	ACOT9	-0.265594	-0.207572	0.153798	-1.29281	0.196077	0.292216
Q53S58	TMEM177	-0.291781	-0.236375	0.0953999	-1.29262	0.196145	0.292216
Q15691	MAPRE1	-0.275579	-0.0893175	0.0661935	-1.2905	0.196877	0.293156
O75781	PALM	-0.265948	-0.152179	0.119655	-1.28967	0.197167	0.293439
Q14444	CAPRIN1	-0.264925	-0.161137	0.102031	-1.28801	0.197742	0.293939
Q14197	MRPL58	-0.26034	-0.210979	0.0905522	-1.28801	0.197742	0.293939
Q9P2R7	SUCLA2	-0.263854	-0.00151828	0.17523	-1.28783	0.197805	0.293939
Q8WVJ2	NUDCD2	-0.265574	-0.0135929	0.129053	-1.28727	0.198002	0.293952
Q96BY2	MOAP1	-0.291039	-0.228822	0.171048	-1.28723	0.198015	0.293952
O15126	SCAMP1	-0.294231	-0.116345	0.168588	-1.2869	0.198129	0.293961
O75663	TIPRL	-0.309323	-0.017398	0.140334	-1.28634	0.198326	0.293961
P04843	RPN1	-0.265757	-0.173581	0.165518	-1.28624	0.198362	0.293961
P42025	ACTR1B	-0.267155	-0.0800103	0.146353	-1.28583	0.198503	0.293961
Q12846	STX4	-0.276081	-0.0629278	0.115336	-1.28577	0.198524	0.293961
Q9UKU0	ACSL6	-0.266459	-0.0615786	0.146722	-1.28505	0.198775	0.294183
P51797	CLCN6	-0.26899	-0.0852275	0.218029	-1.28358	0.199291	0.294632
P54284	CACNB3	-0.283931	-0.250599	0.159231	-1.28337	0.199363	0.294632
P19784	CSNK2A2	-0.26705	-0.0872773	0.131197	-1.28332	0.199381	0.294632
Q9UHB9	SRP68	-0.266089	-0.0625573	0.134003	-1.28172	0.199941	0.295083
O43681	GET3	-0.266267	-0.0818162	0.149669	-1.28167	0.199959	0.295083
P26641	EEF1G	-0.260281	0.0100944	0.227221	-1.28158	0.199991	0.295083
Q9P2U7	SLC17A7	-0.264528	-0.184164	0.171897	-1.2813	0.20009	0.295083
Q9UNN5	FAF1	-0.279437	-0.0146457	0.159937	-1.2806	0.200335	0.295256
Q6ZMQ8	AATK	-0.28494	-0.206195	0.0878428	-1.28039	0.20041	0.295256
P62424	RPL7A	-0.259706	-0.213164	0.116978	-1.27812	0.201208	0.296149
Q99873	PRMT1	-0.264535	-0.0419689	0.138353	-1.27795	0.201267	0.296149
Q9Y230	RUVBL2	-0.262097	-0.173815	0.106097	-1.2773	0.201498	0.296149
Q8TBP6	SLC25A40	-0.288403	-0.229459	0.189977	-1.27719	0.201537	0.296149
P53365	ARFIP2	-0.265665	-0.107647	0.139294	-1.27715	0.20155	0.296149
Q16698	DECR1	-0.259969	-0.205101	0.115616	-1.27665	0.201729	0.296149
O15144	ARPC2	-0.264723	-0.113839	0.121704	-1.27596	0.201972	0.296149
Q92673	SORL1	-0.303598	-0.188155	0.200873	-1.27582	0.202019	0.296149
Q9Y3B7	MRPL11	-0.264385	-0.159842	0.171679	-1.27565	0.20208	0.296149
O75306	NDUFS2	-0.262813	-0.203789	0.171386	-1.2756	0.202097	0.296149
Q9BUE6	ISCA1	-0.274757	-0.0589754	0.181005	-1.2755	0.202132	0.296149
P61201	COPS2	-0.261981	-0.0117296	0.156674	-1.27441	0.20252	0.296355
Q9HCJ6	VAT1L	-0.295591	-0.115572	0.0940196	-1.27425	0.202575	0.296355
A5PLN9	TRAPPC13	-0.293669	-0.139172	0.136528	-1.27425	0.202577	0.296355
P49821	NDUFV1	-0.264669	-0.164321	0.196754	-1.2739	0.2027	0.296387
Q9BT40	INPP5K	-0.273657	-0.0898745	0.130618	-1.27337	0.202889	0.296514
P49441	INPP1	-0.262744	-0.0261992	0.140593	-1.27284	0.203077	0.296516
[truncated: 921 more rows]
