# Supplementary material for: Targeting the Post-Synaptic Proteome in Alzheimer Disease with Psychosis
Source: Research Square preprint supplement (doi:10.21203/rs.3.rs-1514870/v1), 2022-04-04
Supplement: Supplementary file 12 [file e59975e9048467dca338d0fe.xlsx]

## Sheet: Legend
Column Header	Definition
protein	Uniprot Accession #
external_gene_name	Official Gene Symbol
logFC	Log Base 2 of the Fold Change of AD+P relative to AD-P, adjusted for clinical and neuropathological variables
AveExpr AD+P	Average expression across all AD+P samples, in log2
AveExpr AD-P	Average expression across all AD-P samples, in log2
t	t statistic
P.Value
q.value
Entrez	Entrez gene id
Chr	Chromosome
Start(b38)	Gene start position (bp) , human genome buildGRCh38/hg38
End(b38)	Gene end position (bp), human genome buildGRCh38/hg38
#SNP(0kb)	Number of SNPs within the gene boundaries
p(0kb)	MAGMA gene-wide p value using SNPs within the gene boundaries
#SNP(35-10)	Number of SNPs 35kb upstream and 10 kb downstream and within the gene boundary
p(35-10)	MAGMA gene-wide p value using all SNPs 35kb upstream, 10kb downstream, and within within the gene boundaries

## Sheet: Table S5
protein	external_gene_name	logFC	AveExpr AD+P	AveExpr AD-P	t	P.Value	q.value	Entrez	Chr	Start(b38)	End(b38)	#SNP(0kb)	p(0kb)	#SNP(35-10)	p(35-10)
O96008	TOMM40	-0.347022	-0.247274	0.200132	-1.66982	0.0949572	0.205895	10452	19	44891220	44903689	54	4.013e-05	236	0.0002842
P11216	PYGB	-0.260457	-0.0295715	0.176863	-1.25498	0.209487	0.296095	5834	20	25248070	25298012	173	0.000243	322	0.0001883
Q8IU85	CAMK1D	-0.461011	-0.295517	0.218288	-2.25105	0.024384	0.168111	57118	10	12349517	12835545	1849	0.0003314	2027	0.0003562
Q6UWR7	ENPP6	-0.434168	-0.206656	0.134966	-2.09959	0.0357668	0.168111	133121	4	184088706	184217961	462	0.0003801	632	3.377e-05
Q8N2K0	ABHD12	-0.400515	-0.245821	0.217123	-1.91652	0.0553011	0.180147	26090	20	25294743	25390982	241	0.0003868	378	0.0002775
O76003	GLRX3	-0.331393	-0.0619649	0.166242	-1.58038	0.114021	0.222615	10539	10	130136375	130180382	185	0.001402	331	0.003012
Q8N3V7	SYNPO	-0.616603	-0.397482	0.243336	-3.10477	0.00190459	0.168111	11346	5	150586037	150659230	128	0.003096	235	0.005716
Q4KMP7	TBC1D10B	-0.516558	-0.280379	0.280269	-2.46518	0.0136955	0.168111	26000	16	30357101	30370258	14	0.003105	73	0.004886
P08574	CYC1	-0.261971	-0.144548	0.14687	-1.24881	0.211737	0.298526	1537	8	144095035	144097527	1	0.003795	73	0.002554
P31146	CORO1A	-0.301824	-0.0393307	0.223608	-1.46666	0.142471	0.247711	11151	16	30183410	30189076	5	0.004064	60	0.002144
O60890	OPHN1	-0.331393	-0.143413	0.161738	-1.57841	0.114474	0.222615	4983	23	68042344	68433841	408	0.005081	471	0.006492
P10909	CLU	0.0302815	0.0663128	0.0279508	0.14502	0.884695	0.890245	1191	8	27596917	27615031	37	0.005904	186	0.02686
Q9P0J0	NDUFA13	-0.11229	-0.131088	0.0999784	-0.535679	0.592181	0.623267	51079	19	19516210	19528204	23	0.006084	98	0.0081
Q86UW8	HAPLN4	-0.194545	-0.10178	0.109764	-0.926587	0.354142	0.418912	404037	19	19255641	19262787	17	0.006316	119	0.007178
P36776	LONP1	-0.385357	-0.0893674	0.24895	-1.85552	0.0635238	0.185258	9361	19	5691834	5720452	92	0.006426	185	0.002134
P00533	EGFR	-0.43496	-0.173024	0.220035	-2.06623	0.0388084	0.168111	1956	7	55019032	55207338	505	0.007626	592	0.01641
Q14894	CRYM	-0.220496	-0.0705724	0.113111	-1.04536	0.29586	0.366906	1428	16	21258518	21303136	94	0.009759	123	0.01004
Q9H061	TMEM126A	-0.146697	-0.114007	0.0854127	-0.699638	0.484154	0.53018	84233	11	85647919	85656553	15	0.01069	93	0.0116
Q02878	RPL6	-0.270431	-0.235485	0.117746	-1.33054	0.183343	0.275534	6128	12	112405190	112418838	14	0.01151	67	0.005863
Q8NF91	SYNE1	-0.509509	-0.28545	0.245614	-2.45374	0.0141391	0.168111	23345	6	152121684	152637399	1646	0.01167	1782	0.01272
O95757	HSPA4L	-0.446745	-0.13331	0.241847	-2.12609	0.0334974	0.168111	22824	4	127782209	127834073	49	0.01198	97	0.01457
Q8N6H7	ARFGAP2	-0.201291	-0.0761356	0.0824316	-0.958317	0.337904	0.404175	84364	11	47164298	47177503	22	0.01318	109	0.03976
Q92900	UPF1	-0.40117	-0.233472	0.179442	-1.93262	0.0532852	0.177691	5976	19	18831935	18868232	66	0.01361	191	0.03296
Q7L5N1	COPS6	-0.202015	0.0433336	0.110103	-0.979226	0.32747	0.395528	10980	7	100088960	100092200	3	0.01367	74	0.007407
Q08722	CD47	-0.297983	-0.202507	0.185615	-1.42181	0.155083	0.254089	961	3	108043094	108091088	73	0.0137	174	0.07705
P27361	MAPK3	-0.165428	0.0878922	0.154244	-0.823391	0.410287	0.465417	5595	16	30114105	30123309	8	0.01388	66	0.001985
P38646	HSPA9	-0.320308	-0.0971629	0.221222	-1.53045	0.125908	0.228717	3313	5	138554882	138575629	36	0.01453	123	0.007082
Q9HCD6	TANC2	-0.337546	-0.24578	0.170517	-1.64016	0.100973	0.210276	26115	17	62966664	63427706	710	0.0146	806	0.01876
Q7Z4W1	DCXR	-0.37804	-0.201445	0.151427	-1.81383	0.0697054	0.18901	51181	17	82035881	82037697	4	0.01526	101	0.09279
Q99832	CCT7	-0.421835	-0.182718	0.207864	-2.00966	0.0444684	0.168111	10574	2	73233425	73253022	48	0.01589	159	0.09751
Q96JN2	CCDC136	-0.397876	-0.191725	0.181017	-1.89766	0.0577423	0.180793	64753	7	128791410	128822133	58	0.0165	173	0.01965
Q9BQG1	SYT3	-0.224987	-0.155557	0.154209	-1.07272	0.283399	0.356527	84258	19	50621860	50658127	102	0.01682	194	0.05785
Q9UBS5	GABBR1	-0.19409	-0.157722	0.14983	-0.925496	0.354709	0.419273	2550	6	29602228	29633185	128	0.01818	364	0.06728
P43003	SLC1A3	0.000544431	-0.0812494	0.000725637	0.00261202	0.997916	0.997916	6507	5	36606355	36688334	194	0.01894	346	0.0758
Q96A35	MRPL24	-0.381835	-0.273827	0.202021	-1.85777	0.0632041	0.185013	79590	1	156737302	156741266	5	0.02184	101	0.08511
O95169	NDUFB8	-0.194531	-0.134221	0.124911	-0.92754	0.353648	0.418636	4714	10	100523729	100529923	6	0.02249	116	0.02124
O75340	PDCD6	-0.365216	-0.247368	0.128162	-1.79923	0.071984	0.191163	10016	5	271621	314974	198	0.02685	496	0.02616
P23763	VAMP1	-0.00744595	0.0492407	0.042496	-0.0356114	0.971592	0.973413	6843	12	6462237	6470899	30	0.02693	220	0.01898
P29966	MARCKS	-0.182726	-0.145199	0.0571673	-0.883845	0.376781	0.43794	4082	6	113857335	113863475	9	0.02857	100	0.02599
Q13825	AUH	-0.297075	-0.217645	0.175304	-1.42397	0.154456	0.25384	549	9	91213815	91361939	267	0.02939	378	0.02786
O14562	UBFD1	-0.166466	0.0550176	0.140141	-0.816383	0.414283	0.468955	56061	16	23557541	23574394	53	0.02987	184	0.08493
P62753	RPS6	-0.387869	-0.284017	0.173493	-1.91118	0.0559832	0.180147	6194	9	19376256	19380237	7	0.03032	94	0.08441
Q96QK1	VPS35	-0.211132	0.04191	0.147887	-1.03304	0.301586	0.372397	55737	16	46657995	46689232	18	0.03056	45	0.03187
P04075	ALDOA	-0.46753	-0.229902	0.23399	-2.22963	0.0257736	0.168111	226	16	30053090	30070420	10	0.03199	76	0.01695
P31040	SDHA	-0.453341	-0.211636	0.264467	-2.15481	0.0311781	0.168111	6389	5	218223	264816	369	0.03225	606	0.01974
O60381	HBP1	-0.498702	-0.14875	0.231204	-2.36608	0.0179786	0.168111	26959	7	107168961	107202529	54	0.03232	157	0.04561
Q9BXM9	FSD1L	-0.374307	-0.117267	0.194788	-1.77633	0.0756801	0.193599	83856	9	105442242	105552433	233	0.03275	302	0.05185
P50583	NUDT2	-0.168712	0.0153888	0.0943116	-0.808366	0.418881	0.472826	318	9	34329506	34343713	32	0.03276	140	0.03368
Q14204	DYNC1H1	-0.462601	-0.197163	0.227333	-2.2037	0.0275466	0.168111	1778	14	101964528	102050798	164	0.03303	351	0.03326
P30626	SRI	-0.418698	-0.209626	0.209514	-1.99671	0.0458588	0.168111	6717	7	88205115	88226993	34	0.0333	92	0.06896
Q14254	FLOT2	-0.168218	-0.173944	0.0914169	-0.814201	0.415531	0.469973	2319	17	28879339	28897697	25	0.03572	67	0.0617
P41743	PRKCI	-0.467555	-0.230195	0.219057	-2.23106	0.0256784	0.168111	5584	3	170222432	170305982	274	0.03952	391	0.03937
P51570	GALK1	-0.415794	-0.159223	0.183646	-1.98006	0.0476988	0.170208	2584	17	75757937	75765199	15	0.03974	95	0.05808
P08559	PDHA1	-0.252699	-0.190249	0.175911	-1.2054	0.228053	0.313182	5160	23	19343893	19361707	43	0.03989	97	0.05132
P11177	PDHB	-0.279546	-0.191361	0.192551	-1.33297	0.182544	0.275534	5162	3	58427630	58433852	24	0.04013	182	0.04725
Q9NQ66	PLCB1	-0.342426	-0.0583924	0.295568	-1.68517	0.0919582	0.203685	23236	20	8132254	8884900	2362	0.04105	2529	0.05628
Q5T848	GPR158	-0.145732	-0.0639062	0.119479	-0.691159	0.489467	0.534896	57512	10	25174737	25602233	1795	0.04144	1937	0.05167
Q9GZV7	HAPLN2	-0.403697	-0.170003	0.150502	-1.92567	0.0541472	0.178708	60484	1	156618801	156625725	11	0.04165	136	0.2506
P35222	CTNNB1	-0.435912	-0.234808	0.195266	-2.09034	0.0365888	0.168111	1499	3	41199451	41240448	50	0.04167	119	0.03839
P46976	GYG1	-0.204912	-0.164954	0.0640593	-0.997395	0.318574	0.387803	2992	3	148991408	149027669	73	0.04182	213	0.02083
P62937	PPIA	-0.0566897	0.146224	0.087223	-0.282637	0.777455	0.788267	5478	7	44796636	44803123	19	0.042	117	0.03967
Q15700	DLG2	-0.481461	-0.243674	0.231301	-2.29824	0.0215495	0.168111	1740	11	83455012	85628534	6075	0.0421	6171	0.03803
P07602	PSAP	-0.665262	-0.315142	0.343329	-3.17244	0.00151195	0.168111	5660	10	71816298	71851325	118	0.04474	288	0.1211
Q9H269	VPS16	-0.494471	-0.257806	0.248369	-2.36047	0.0182529	0.168111	64601	20	2840697	2866732	72	0.04486	165	0.05581
P13489	RNH1	-0.285661	0.0307763	0.14921	-1.39305	0.163608	0.260602	6050	11	494512	507283	67	0.04504	305	0.07391
Q00688	FKBP3	-0.323874	-0.220182	0.146204	-1.56942	0.116552	0.223124	2287	14	45115599	45134529	20	0.04532	86	0.06182
P04844	RPN2	-0.111242	-0.103421	0.135352	-0.528239	0.597334	0.627455	6185	20	37179051	37241623	191	0.04547	322	0.07995
P62333	PSMC6	-0.453694	-0.181313	0.251219	-2.15096	0.0314808	0.168111	5706	14	52707163	52727998	26	0.04569	130	0.08534
Q9H0R4	HDHD2	-0.296884	-0.114125	0.131484	-1.41326	0.157582	0.256921	84064	18	47107410	47150515	139	0.04636	268	0.02689
P08238	HSP90AB1	-0.194463	0.0521135	0.113195	-0.946025	0.344137	0.409796	3326	6	44246166	44253888	28	0.04646	132	0.06198
Q8WU79	SMAP2	-0.462657	-0.263709	0.21961	-2.22709	0.0259425	0.168111	64744	1	40344844	40423326	176	0.04685	329	0.1255
Q9NWV8	BABAM1	-0.414282	-0.303265	0.18461	-2.04859	0.0405035	0.168111	29086	19	17267376	17279353	39	0.04728	193	0.1169
Q9Y2E4	DIP2C	-0.446033	-0.182224	0.2199	-2.12253	0.0337946	0.168111	22982	10	274190	689689	997	0.04742	1213	0.06276
Q9BZF1	OSBPL8	-0.425559	-0.281057	0.21448	-2.06806	0.0386362	0.168111	114882	12	76351797	76559809	381	0.0493	499	0.05396
Q96Q05	TRAPPC9	-0.54836	-0.297108	0.278808	-2.62585	0.00864421	0.168111	83696	8	139728081	140458579	2104	0.04945	2165	0.05866
P37840	SNCA	-0.0968612	0.0429642	0.00757359	-0.460294	0.645306	0.669948	6622	4	89724099	89838314	420	0.05004	629	0.03716
P36543	ATP6V1E1	-0.253768	-0.174955	0.16084	-1.21032	0.226158	0.311647	529	22	17592136	17628822	201	0.05059	342	0.04023
P62081	RPS7	-0.226719	-0.20781	0.0616658	-1.12206	0.26184	0.338429	6201	2	3575263	3580919	28	0.05208	199	0.09758
Q00325	SLC25A3	-0.306658	-0.209006	0.176655	-1.46583	0.142696	0.247711	5250	12	98593625	98602000	14	0.05219	148	0.347
P11217	PYGM	-0.0877005	0.101529	0.0640328	-0.428087	0.668588	0.6901	5837	11	64746389	64760715	27	0.05364	67	0.06323
O94925	GLS	-0.292394	-0.0901269	0.173007	-1.38925	0.164759	0.261544	2744	2	190880821	190965552	104	0.05377	210	0.03928
P27544	CERS1	-0.273355	-0.153094	0.155058	-1.30318	0.192516	0.282187	10715	19	18868546	18896727	60	0.05436	167	0.03494
P16112	ACAN	-0.0936263	-0.0626836	0.0476534	-0.446266	0.655406	0.678677	176	15	88803442	88875354	225	0.05492	321	0.05734
Q8N1I0	DOCK4	-0.502584	-0.323027	0.220872	-2.4775	0.0132316	0.168111	9732	7	111726108	112206407	1068	0.05513	1158	0.05249
P49327	FASN	-0.324942	-0.0145461	0.177121	-1.57288	0.115748	0.222937	2194	17	82078338	82098289	41	0.05525	203	0.2313
Q13596	SNX1	-0.382934	-0.130272	0.175346	-1.81691	0.0692333	0.18854	6642	15	64094076	64144234	95	0.05639	221	0.05726
P05388	RPLP0	-0.339963	-0.276894	0.145221	-1.68396	0.0921915	0.203685	6175	12	120196700	120201211	6	0.05676	61	0.05359
Q9Y697	NFS1	-0.25401	-0.0384065	0.14519	-1.21318	0.225065	0.310942	9054	20	35668688	35699365	68	0.05733	198	0.1233
Q9Y2I8	WDR37	-0.440447	-0.270321	0.233293	-2.11644	0.0343093	0.168111	22884	10	1056836	1132297	225	0.05854	350	0.08395
Q93008	USP9X	-0.442628	-0.108659	0.230276	-2.11286	0.0346143	0.168111	8239	23	41085433	41236579	251	0.05958	325	0.04679
Q86SX6	GLRX5	-0.254093	-0.0631045	0.138011	-1.20714	0.227382	0.312528	51218	14	95534986	95544718	39	0.05959	212	0.04306
O60861	GAS7	-0.48012	-0.299024	0.260069	-2.31431	0.0206521	0.168111	8522	17	9910609	10198551	1079	0.05961	1366	0.09951
P23396	RPS3	-0.269602	-0.208274	0.106561	-1.31732	0.187732	0.278742	6188	11	75399491	75422302	36	0.0598	164	0.0688
Q9UNM6	PSMD13	-0.441765	-0.170185	0.28686	-2.10204	0.0355515	0.168111	5719	11	236808	252984	99	0.06009	343	0.1991
Q9UL25	RAB21	-0.476119	-0.264621	0.196239	-2.31182	0.0207887	0.168111	23011	12	71754850	71787370	40	0.06076	189	0.05418
Q9NY65	TUBA8	-0.431763	-0.236595	0.182597	-2.08056	0.0374761	0.168111	51807	22	18110687	18131731	45	0.06125	174	0.01805
Q9UHQ4	BCAP29	-0.0244964	-0.0890562	0.0171835	-0.117316	0.90661	0.911154	55973	7	107579977	107623317	69	0.06164	146	0.06303
P30085	CMPK1	-0.369918	-0.117948	0.174741	-1.75371	0.0794821	0.195728	51727	1	47333797	47378839	106	0.06244	225	0.06057
Q9BSJ8	ESYT1	-0.357795	-0.113363	0.193813	-1.69853	0.089409	0.202552	23344	12	56128202	56144676	19	0.0632	77	0.09434
P22830	FECH	-0.35117	-0.184075	0.157041	-1.67622	0.0936967	0.204407	2235	18	57544841	57586737	125	0.06338	259	0.09512
P09493	TPM1	-0.184843	-0.143587	0.0808405	-0.886363	0.375423	0.436995	7168	15	63042639	63071915	102	0.06371	283	0.06369
Q13011	ECH1	-0.324107	-0.233341	0.142424	-1.58145	0.113777	0.222558	1891	19	38815422	38831857	39	0.06561	146	0.04696
P31153	MAT2A	-0.365394	-0.0860646	0.178913	-1.73811	0.0821927	0.198605	4144	2	85538978	85545280	10	0.06598	164	0.07945
Q9Y490	TLN1	-0.385264	-0.128521	0.147012	-1.83437	0.0666003	0.186476	7094	9	35697337	35732395	43	0.0669	100	0.1233
P07339	CTSD	-0.444279	-0.241434	0.243754	-2.11897	0.034095	0.168111	1509	11	1752752	1763992	30	0.06849	144	0.186
Q9Y2A7	NCKAP1	-0.383486	-0.197448	0.214584	-1.828	0.0675519	0.186476	10787	2	182924851	183038858	264	0.0688	390	0.0732
Q14008	CKAP5	-0.495601	-0.213424	0.252064	-2.36003	0.0182746	0.168111	9793	11	46743534	46846308	154	0.06896	237	0.07199
Q9Y2S6	TMA7	-0.390306	-0.180785	0.160154	-1.86216	0.0625827	0.184766	51372	3	48440276	48444129	10	0.07252	70	0.06677
P31943	HNRNPH1	-0.243098	-0.100427	0.101296	-1.15834	0.246727	0.327608	3187	5	179614178	179634784	74	0.07345	219	0.05666
Q96P70	IPO9	-0.396618	-0.147604	0.210601	-1.88032	0.0600662	0.183168	55705	1	201829160	201884294	90	0.0735	161	0.1058
P49840	GSK3A	-0.303021	-0.163198	0.189961	-1.44286	0.149063	0.250093	2931	19	42230186	42242584	12	0.07463	73	0.06273
Q9Y2V2	CARHSP1	-0.307498	-0.0969093	0.17415	-1.45991	0.144317	0.248374	23589	16	8852942	8869012	82	0.07607	243	0.1213
P14625	HSP90B1	-0.0371314	0.138274	0.0471485	-0.182658	0.855066	0.863682	7184	12	103930334	103947930	71	0.07641	295	0.1647
P21926	CD9	-0.350888	-0.206909	0.113084	-1.70997	0.0872731	0.202151	928	12	6199844	6238271	55	0.07734	199	0.062
P05091	ALDH2	-0.4268	-0.252494	0.204421	-2.05529	0.0398528	0.168111	217	12	111766887	111809985	40	0.07834	77	0.09903
Q5HYI7	MTX3	-0.361026	-0.199573	0.207445	-1.72139	0.0851824	0.199755	345778	5	79976716	79991265	27	0.0785	115	0.09104
P51659	HSD17B4	-0.374532	-0.20625	0.180263	-1.78842	0.0737108	0.192473	3295	5	119452443	119542335	284	0.07851	412	0.05988
Q86YM7	HOMER1	-0.43485	-0.287941	0.190828	-2.13498	0.0327644	0.168111	9456	5	79373824	79513836	311	0.07865	414	0.1114
Q99460	PSMD1	-0.455826	-0.176147	0.246353	-2.16102	0.0306951	0.168111	5707	2	231056864	231172827	169	0.07946	292	0.1541
P60660	MYL6	-0.420465	-0.250343	0.183102	-2.03818	0.0415336	0.168111	4637	12	56158261	56161582	5	0.0797	49	0.04827
Q9UPR5	SLC8A2	-0.36215	-0.168228	0.196131	-1.72443	0.0846328	0.199652	6543	19	47428017	47472050	90	0.08095	184	0.2541
Q8IVF2	AHNAK2	-0.623429	-0.355543	0.214396	-3.11511	0.00183909	0.168111	113146	14	104937253	104978357	137	0.08106	280	0.05726
Q9UDY2	TJP2	-0.407804	-0.166126	0.150043	-1.94496	0.0517812	0.175596	9414	9	69121264	69255208	475	0.08131	666	0.06372
Q6P1Q0	LETMD1	-0.360072	-0.266567	0.18717	-1.75519	0.079229	0.195513	25875	12	51048230	51067369	50	0.08201	173	0.04234
P35580	MYH10	-0.45289	-0.273353	0.216083	-2.19216	0.0283694	0.168111	4628	17	8474205	8631012	223	0.08242	309	0.06459
Q9Y3F4	STRAP	-0.419139	-0.190282	0.197744	-1.99842	0.0456725	0.168111	11171	12	15882354	15903478	11	0.08287	49	0.1225
P62888	RPL30	-0.182733	-0.109858	0.102814	-0.871098	0.383702	0.443095	6156	8	98041710	98045590	8	0.08544	127	0.612
Q86XE0	SNX32	-0.457571	-0.235289	0.271513	-2.18019	0.0292452	0.168111	254122	11	65833939	65855049	30	0.08551	169	0.04702
Q9GZY8	MFF	-0.285056	-0.236816	0.122902	-1.40108	0.161193	0.259071	56947	2	227325151	227357836	116	0.08853	273	0.0595
Q9H4B0	OSGEPL1	-0.430477	-0.153363	0.211746	-2.04123	0.0412299	0.168111	64172	2	189746660	189763198	23	0.08945	117	0.06333
Q9NVA1	UQCC1	-0.201247	-0.148636	0.122874	-0.960005	0.337054	0.40376	55245	20	35302566	35412142	168	0.0903	290	0.09935
P23528	CFL1	-0.276894	-0.00831115	0.178386	-1.34336	0.179158	0.273425	1072	11	65854811	65858333	9	0.09046	89	0.09405
Q9H2H8	PPIL3	-0.237639	-0.0252665	0.0864613	-1.1285	0.25911	0.336256	53938	2	200870907	200889333	36	0.09083	97	0.2014
Q14694	USP10	-0.343306	-0.185498	0.193799	-1.63676	0.101683	0.210451	9100	16	84699949	84779922	320	0.09092	512	0.1648
Q9H8H3	METTL7A	-0.241618	-0.0244111	0.128433	-1.15416	0.248437	0.329061	25840	12	50923811	50932517	16	0.09312	138	0.0959
P04083	ANXA1	-0.309699	-0.10007	0.113678	-1.47428	0.140408	0.246405	301	9	73151731	73170393	38	0.09316	189	0.1505
Q96BQ5	CCDC127	-0.313839	-0.210907	0.138646	-1.51858	0.128869	0.232545	133957	5	204760	218182	61	0.09321	437	0.02951
Q8TF61	FBXO41	-0.484518	-0.296529	0.226207	-2.3607	0.0182415	0.168111	150726	2	73254682	73284453	45	0.09361	122	0.005781
Q9ULU8	CADPS	-0.313315	-0.0214182	0.190107	-1.51825	0.128953	0.232545	8618	3	62398346	62875389	1766	0.09459	1854	0.1097
Q16352	INA	-0.446997	-0.27658	0.165936	-2.20142	0.0277079	0.168111	9118	10	103277163	103290351	24	0.09481	113	0.1333
Q14318	FKBP8	-0.388044	-0.277526	0.198241	-1.89321	0.0583316	0.181325	23770	19	18531758	18544077	17	0.09563	116	0.1363
Q6UXV4	APOOL	-0.367757	-0.24587	0.190365	-1.77455	0.0759742	0.193599	139322	23	85003892	85093317	65	0.0957	138	0.09624
Q684P5	RAP1GAP2	-0.450741	-0.180937	0.240942	-2.13827	0.032496	0.168111	23108	17	2755698	3037741	1019	0.09626	1124	0.09726
Q9Y6D6	ARFGEF1	-0.524917	-0.247768	0.228498	-2.50767	0.0121538	0.168111	10565	8	67175296	67343897	247	0.09642	300	0.09576
P25789	PSMA4	-0.302033	-0.203583	0.142155	-1.45491	0.145697	0.248546	5685	15	78540405	78549220	34	0.0969	148	0.06069
O14548	COX7A2L	-0.289063	-0.21023	0.193835	-1.37935	0.167789	0.262762	9167	2	42350501	42369010	27	0.09824	126	0.187
Q9UPR0	PLCL2	-0.575895	-0.279145	0.276794	-2.74879	0.00598223	0.168111	23228	3	16884959	17090606	515	0.09835	658	0.1288
P35268	RPL22	-0.209152	-0.237238	0.0756879	-1.04187	0.297472	0.368452	6146	1	6185020	6199619	34	0.09843	125	0.2167
Q9UHV9	PFDN2	-0.340066	-0.13349	0.166134	-1.61645	0.105999	0.214403	5202	1	161100556	161118076	35	0.09953	107	0.07949
P07237	P4HB	-0.167042	-0.0333705	0.098828	-0.793428	0.42753	0.480896	5034	17	81843158	81860668	27	0.09996	87	0.1168
P83731	RPL24	-0.233637	-0.229054	0.0839666	-1.15767	0.246999	0.327697	6152	3	101681090	101686719	10	0.1001	88	0.05341
Q13190	STX5	-0.417515	-0.214006	0.191537	-1.99341	0.0462181	0.168111	6811	11	62806860	62832091	42	0.1004	118	0.1193
O14936	CASK	-0.470101	-0.227251	0.220749	-2.2426	0.0249237	0.168111	8573	23	41514934	41923078	348	0.1014	384	0.1011
P17677	GAP43	-0.325263	-0.213988	0.147349	-1.57116	0.116148	0.222937	2596	3	115623304	115721487	243	0.1036	368	0.1353
Q9Y3C8	UFC1	-0.213442	0.0262413	0.127092	-1.03347	0.301387	0.372397	51506	1	161153744	161158856	10	0.1036	72	0.06113
Q9HD33	MRPL47	-0.306295	-0.187051	0.158732	-1.46227	0.14367	0.248374	57129	3	179588465	179604646	27	0.1039	108	0.1205
Q8N387	MUC15	-0.544436	-0.337063	0.240756	-2.68216	0.00731568	0.168111	143662	11	26559032	26572268	48	0.1041	320	0.06499
Q8TDJ6	DMXL2	-0.484119	-0.257503	0.265266	-2.30891	0.0209498	0.168111	23312	15	51447724	51622833	411	0.1044	484	0.1195
P27824	CANX	-0.182931	0.00913277	0.134868	-0.882789	0.377352	0.438128	821	5	179678646	179731641	139	0.1048	248	0.06974
Q15555	MAPRE2	-0.414183	-0.239393	0.184453	-1.99701	0.045826	0.168111	10982	18	34976928	35143470	368	0.1051	467	0.1753
Q15185	PTGES3	-0.342972	-0.131382	0.149093	-1.63322	0.102425	0.21117	10728	12	56663341	56688408	52	0.1051	134	0.1213
Q96FW1	OTUB1	-0.273619	0.00165688	0.158792	-1.32511	0.185135	0.276497	55611	11	63985853	63998420	18	0.1058	108	0.1309
O00499	BIN1	-0.30286	-0.117306	0.155526	-1.43759	0.150553	0.250869	274	2	127048023	127107400	233	0.1064	421	0.01828
Q6P2I7	EBLN2	-0.134192	-0.0256908	0.0769499	-0.636683	0.524333	0.56635	55096	3	73061659	73063337	7	0.1069	135	0.1075
Q9Y4L1	HYOU1	-0.0437265	0.0143592	0.0852305	-0.209087	0.834381	0.844383	10525	11	119044185	119057246	20	0.1072	126	0.3732
Q7Z3B1	NEGR1	-0.324042	-0.239578	0.142519	-1.58497	0.112976	0.221532	257194	1	71402942	72282847	1782	0.1078	1844	0.07707
Q15773	MLF2	-0.267322	-0.20958	0.130336	-1.29655	0.194787	0.283777	8079	12	6747992	6753470	17	0.1103	150	0.08714
Q13057	COASY	-0.344886	-0.18954	0.16023	-1.64673	0.0996157	0.210176	80347	17	42562074	42566281	5	0.1107	104	0.1691
Q9NRW1	RAB6B	-0.012008	0.0355377	0.0306114	-0.0571523	0.954424	0.95681	51560	3	133824235	133895847	188	0.1116	307	0.1633
Q15042	RAB3GAP1	-0.558379	-0.300363	0.278571	-2.67689	0.00743167	0.168111	22930	2	135052265	135175584	175	0.112	290	0.08623
O96000	NDUFB10	-0.144207	-0.141111	0.093797	-0.689017	0.490814	0.535555	4716	16	1959516	1961975	21	0.1123	198	0.2549
Q86VU5	COMTD1	-0.410877	-0.188676	0.28963	-1.95078	0.051085	0.175515	118881	10	75233971	75236057	2	0.113	109	0.5124
Q8N122	RPTOR	-0.448037	-0.21625	0.20538	-2.13752	0.0325576	0.168111	57521	17	80544825	80966373	1732	0.1132	1874	0.08493
Q5JPH6	EARS2	-0.344057	-0.177872	0.188457	-1.64012	0.100981	0.210276	124454	16	23522013	23557375	108	0.1137	247	0.1266
Q13554	CAMK2B	-0.427617	-0.240644	0.210499	-2.04627	0.0407314	0.168111	816	7	44217150	44325994	273	0.114	353	0.1274
Q16864	ATP6V1F	-0.137236	-0.121051	0.0757495	-0.655179	0.512353	0.554531	9296	7	128862803	128865849	7	0.1142	137	0.0347
Q8IUS5	EPHX4	-0.270045	-0.212954	0.166621	-1.29537	0.195195	0.283855	253152	1	92029976	92063536	74	0.1148	218	0.0444
Q5T5P2	KIAA1217	-0.353769	-0.239943	0.169838	-1.715	0.0863475	0.20131	56243	10	23694746	24547848	2368	0.1155	2520	0.1069
Q9NZR1	TMOD2	-0.21143	-0.111685	0.101797	-1.008	0.313456	0.383576	29767	15	51751561	51816363	185	0.1155	307	0.1
O00186	STXBP3	-0.423748	-0.134579	0.198249	-2.00884	0.0445563	0.168111	6814	1	108746663	108809526	211	0.1158	330	0.05141
P46109	CRKL	-0.215347	0.0230329	0.14057	-1.04517	0.295945	0.366906	1399	22	20917398	20953749	87	0.1159	199	0.2306
Q8TC12	RDH11	-0.383054	-0.171961	0.188752	-1.82545	0.0679354	0.186476	51109	14	67676800	67695793	30	0.1164	171	0.08205
Q04837	SSBP1	-0.160736	-0.117668	0.0686474	-0.767551	0.442755	0.49318	6742	7	141738321	141750488	17	0.1168	85	0.07793
P62258	YWHAE	-0.202689	0.0086817	0.105307	-0.971666	0.331218	0.399154	7531	17	1344540	1400375	195	0.1168	387	0.1688
Q02252	ALDH6A1	-0.390451	-0.0371733	0.235731	-1.90467	0.0568244	0.180315	4329	14	74057662	74084493	91	0.117	232	0.1286
O43765	SGTA	-0.174928	0.0542282	0.125946	-0.854434	0.392866	0.451885	6449	19	2754713	2783356	64	0.1174	146	0.1604
P15880	RPS2	-0.311011	-0.25807	0.105928	-1.54741	0.121766	0.22592	6187	16	1962061	1964826	22	0.1177	245	0.3137
Q8NFP9	NBEA	-0.353597	-0.20946	0.180561	-1.68919	0.0911853	0.203535	26960	13	34942287	35672737	1849	0.1193	1951	0.1279
P06396	GSN	-0.397731	-0.136688	0.143941	-1.89544	0.0580354	0.181107	2934	9	121210803	121332844	248	0.1198	350	0.1759
P43155	CRAT	-0.359258	-0.176358	0.212645	-1.70957	0.0873474	0.202151	1384	9	129094794	129110791	27	0.1213	136	0.1546
P04156	PRNP	-0.295674	-0.238151	0.113662	-1.4578	0.144898	0.248389	5621	20	4686151	4701588	36	0.122	184	0.3322
Q9P1Y5	CAMSAP3	-0.252891	-0.199737	0.147154	-1.21421	0.224669	0.31077	57662	19	7595902	7618310	48	0.1222	231	0.1802
O95248	SBF1	-0.455584	-0.187796	0.233495	-2.16581	0.030327	0.168111	6305	22	50444630	50480296	90	0.1237	247	0.5435
Q9P0K1	ADAM22	-0.370666	-0.204086	0.202504	-1.76765	0.0771213	0.194362	53616	7	87934157	88202889	450	0.1241	500	0.09512
Q9HAD4	WDR41	-0.265291	-0.152031	0.145848	-1.26495	0.20589	0.294512	55255	5	77430933	77620611	744	0.1243	867	0.1718
Q969P0	IGSF8	-0.326062	-0.253075	0.152619	-1.59819	0.110003	0.218373	93185	1	160091339	160098860	13	0.1244	124	0.2525
P13804	ETFA	-0.391211	-0.1593	0.185136	-1.86277	0.0624962	0.184766	2108	15	76216287	76311469	208	0.1247	299	0.0489
O75363	BCAS1	-0.3896	-0.164169	0.159133	-1.85773	0.063209	0.185013	8537	20	53943540	54070765	559	0.1256	707	0.1269
P17252	PRKCA	-0.427047	-0.216248	0.215722	-2.03662	0.0416902	0.168111	5578	17	66302782	66810744	1705	0.126	1892	0.1414
Q9UMS0	NFU1	-0.20506	0.0728929	0.156479	-1.01611	0.30958	0.379929	27247	2	69396113	69437628	98	0.1272	176	0.1601
Q7Z406	MYH14	-0.53468	-0.283797	0.208187	-2.60685	0.0091388	0.168111	79784	19	50188186	50310544	568	0.1273	675	0.1724
P27797	CALR	0.00427818	0.21533	0.0815759	0.0218186	0.982593	0.983819	811	19	12938600	12944490	6	0.1274	74	0.102
O14490	DLGAP1	-0.580497	-0.344829	0.241712	-2.86668	0.00414852	0.168111	9229	18	3496032	4455310	3232	0.1274	3357	0.1041
O75962	TRIO	-0.451894	-0.236431	0.223225	-2.15692	0.0310134	0.168111	7204	5	14143708	14510204	821	0.1281	944	0.09319
O60762	DPM1	-0.283744	-0.247264	0.134763	-1.39514	0.162977	0.260245	8813	20	50934855	50958561	32	0.1285	113	0.2658
P43378	PTPN9	-0.330329	-0.212405	0.21009	-1.57539	0.115169	0.222615	5780	15	75467121	75579291	148	0.1286	221	0.1918
Q13200	PSMD2	-0.366396	-0.122037	0.226122	-1.74335	0.081275	0.197568	5708	3	184299098	184309054	14	0.129	103	0.1396
P16615	ATP2A2	-0.256085	-0.0474444	0.188853	-1.23102	0.218316	0.305792	488	12	110281227	110351093	149	0.1293	238	0.1367
Q2M3C7	SPHKAP	-0.496817	-0.254316	0.23394	-2.37462	0.0175683	0.168111	80309	2	227979954	228181962	697	0.1296	788	0.09654
Q12979	ABR	-0.515191	-0.334982	0.218407	-2.55174	0.0107197	0.168111	29	17	1003518	1187322	734	0.13	910	0.0776
Q9Y4G8	RAPGEF2	-0.482663	-0.232621	0.234115	-2.30196	0.0213385	0.168111	9693	4	159104071	159360162	462	0.1301	540	0.1395
Q16623	STX1A	-0.206516	-0.111949	0.113487	-0.984149	0.325044	0.393487	6804	7	73699205	73719702	32	0.1303	124	0.3396
P61225	RAP2B	-0.124819	-0.144503	0.0785013	-0.599163	0.549065	0.586351	5912	3	153162212	153170624	8	0.1308	84	0.4244
Q15907	RAB11B	-0.130081	-0.0315415	0.0812078	-0.617025	0.537219	0.57716	9230	19	8390321	8404434	52	0.1309	185	0.04402
Q7Z7E8	UBE2Q1	-0.465059	-0.244469	0.226898	-2.22094	0.0263565	0.168111	55585	1	154548575	154558644	12	0.131	101	0.8185
P53597	SUCLG1	-0.205661	0.0446566	0.153766	-1.00877	0.313087	0.383576	8802	2	84423523	84459462	89	0.1311	187	0.1763
P09936	UCHL1	-0.151269	0.121936	0.120347	-0.754721	0.450417	0.499288	7345	4	41256881	41268429	41	0.1336	190	0.1214
Q06830	PRDX1	-0.412291	-0.223599	0.163626	-1.98859	0.0467483	0.168871	5052	1	45511035	45522890	39	0.1338	174	0.2069
Q92686	NRGN	-0.36331	-0.296157	0.194028	-1.78745	0.0738674	0.192473	4900	11	124739933	124747206	10	0.1343	92	0.07032
Q9Y277	VDAC3	-0.351387	-0.245696	0.210753	-1.6842	0.0921445	0.203685	7419	8	42391624	42405937	15	0.1345	98	0.3392
P62820	RAB1A	-0.123785	-0.108056	0.0779881	-0.590366	0.554946	0.591844	5861	2	65086854	65130301	120	0.1351	236	0.2384
O14523	C2CD2L	-0.438399	-0.301528	0.203556	-2.15514	0.0311527	0.168111	9854	11	119107341	119118347	24	0.1363	125	0.3123
P17302	GJA1	-0.117246	-0.0369749	0.122303	-0.55808	0.57679	0.611078	2697	6	121435577	121449744	37	0.1373	244	0.04061
Q7Z460	CLASP1	-0.620416	-0.24565	0.289944	-2.95505	0.00312666	0.168111	23332	2	121337776	121649476	701	0.1375	816	0.1337
Q9Y2B0	CNPY2	-0.0981256	0.157499	0.130557	-0.497076	0.619136	0.646322	10330	12	56310428	56316344	4	0.1383	76	0.2376
Q15120	PDK3	-0.490888	-0.243936	0.288056	-2.33805	0.0193858	0.168111	5165	23	24465227	24550466	127	0.1404	204	0.1019
Q7Z6Z7	HUWE1	-0.402791	-0.128644	0.206906	-1.91118	0.0559837	0.180147	10075	23	53532096	53686729	52	0.1408	67	0.1218
P15104	GLUL	-0.0830772	-0.048583	0.071463	-0.39422	0.693419	0.711153	2752	1	182378093	182392206	50	0.1413	166	0.1558
Q9Y496	KIF3A	-0.358117	-0.242693	0.193506	-1.7237	0.0847642	0.199652	11127	5	132689161	132737633	82	0.142	147	0.1973
P50995	ANXA11	-0.428368	-0.210088	0.230061	-2.04196	0.0411568	0.168111	311	10	80152610	80205677	206	0.1423	337	0.1371
Q9NRP0	OSTC	-0.147364	-0.102138	0.178804	-0.699508	0.484236	0.53018	58505	4	108650585	108667822	42	0.1433	138	0.2528
Q15477	SKIV2L	-0.548279	-0.295289	0.237128	-2.65998	0.0078154	0.168111	6499	6	31958804	31969755	39	0.1434	179	0.1047
Q9C0H9	SRCIN1	-0.526996	-0.312435	0.228641	-2.58189	0.00982686	0.168111	80725	17	38530024	38605930	122	0.1441	280	0.2089
Q9Y639	NPTN	-0.140373	-0.0641231	0.0831254	-0.666848	0.50487	0.548282	27020	15	73560003	73633412	129	0.1444	220	0.1095
Q9Y6D5	ARFGEF2	-0.487317	-0.257687	0.225507	-2.3359	0.0194977	0.168111	10564	20	48921721	49036693	285	0.1449	481	0.2121
P78357	CNTNAP1	-0.466187	-0.269616	0.204282	-2.2622	0.0236865	0.168111	8506	17	42682614	42699993	26	0.1454	83	0.0723
P07203	GPX1	-0.303851	-0.140036	0.138339	-1.44858	0.147457	0.248546	2876	3	49357176	49358358	2	0.1461	79	0.1602
P20916	MAG	-0.417295	-0.203743	0.138108	-2.01314	0.0441012	0.168111	4099	19	35292086	35313807	41	0.1464	156	0.3498
Q9UNZ2	NSFL1C	-0.138935	0.0988455	0.0984094	-0.683779	0.494116	0.538791	55968	20	1442162	1467720	41	0.1489	215	0.02167
P52565	ARHGDIA	-0.0282295	0.111611	0.0386775	-0.137337	0.890764	0.895791	396	17	81867719	81871406	4	0.149	48	0.1221
Q9H3Q1	CDC42EP4	-0.294966	-0.0763322	0.117814	-1.39846	0.161976	0.25955	23580	17	73283624	73312004	88	0.1491	174	0.3044
P35080	PFN2	-0.100145	0.05317	0.0897331	-0.484466	0.628056	0.653308	5217	3	149964904	149970954	8	0.1518	119	0.1758
Q9HAR2	ADGRL3	-0.406841	-0.229978	0.198435	-1.9463	0.051621	0.175596	23284	4	61383124	62078335	1511	0.1531	1579	0.1681
O15294	OGT	-0.521143	-0.294142	0.250681	-2.51493	0.0119065	0.168111	8473	23	71533062	71575897	12	0.1533	22	0.2041
Q9BY11	PACSIN1	-0.0341347	-0.0512785	0.0622689	-0.16227	0.871093	0.878211	29993	6	34466061	34536262	186	0.1539	342	0.1127
O43674	NDUFB5	-0.112854	-0.122612	0.0853179	-0.538475	0.59025	0.622051	4711	3	179604787	179624500	28	0.1548	113	0.1144
P55072	VCP	-0.371282	-0.211239	0.187904	-1.7727	0.076281	0.193599	7415	9	35056068	35072742	31	0.1556	115	0.06859
Q5VIR6	VPS53	-0.413423	-0.181157	0.218312	-1.96742	0.049136	0.172838	55275	17	508668	714856	738	0.1558	945	0.2098
P26232	CTNNA2	-0.400564	-0.189311	0.187839	-1.91008	0.0561244	0.180147	1496	2	79512934	80648868	3143	0.1562	3232	0.1099
Q96FZ7	CHMP6	-0.34148	-0.117198	0.141612	-1.62417	0.104341	0.214019	79643	17	80991841	81000133	33	0.157	195	0.1688
Q13510	ASAH1	-0.531866	-0.261681	0.269278	-2.5367	0.0111913	0.168111	427	8	18056416	18084998	199	0.1577	411	0.3521
O43639	NCK2	-0.310479	-0.0722315	0.132589	-1.47276	0.140818	0.246507	8440	2	105744942	105894274	531	0.1577	708	0.2263
Q9Y285	FARSA	-0.316136	-0.209762	0.219758	-1.50736	0.13172	0.235803	2193	19	12922470	12933744	21	0.158	82	0.0569
Q8IYB5	SMAP1	-0.298852	-0.0665933	0.176193	-1.42623	0.153805	0.253689	60682	6	70667771	70862015	391	0.1587	492	0.1436
Q13303	KCNAB2	-0.29981	-0.223314	0.13939	-1.45829	0.144762	0.248389	8514	1	5992298	6101193	279	0.1588	443	0.3932
Q8NCA5	FAM98A	-0.403623	-0.204497	0.168609	-1.93015	0.0535899	0.177967	25940	2	33583661	33599362	42	0.159	186	0.1749
P14136	GFAP	-0.350666	-0.141482	0.163145	-1.66966	0.094989	0.205895	2670	17	44905626	44915552	37	0.1591	167	0.1286
A0AVT1	UBA6	-0.487125	-0.134048	0.262342	-2.32534	0.0200549	0.168111	55236	4	67615761	67701171	244	0.1608	372	0.1472
O76070	SNCG	-0.446005	-0.274222	0.100506	-2.2371	0.0252814	0.168111	6623	10	86958531	86963260	18	0.1618	145	0.3384
Q8N1B4	VPS52	-0.321658	-0.149584	0.168763	-1.53214	0.125491	0.228706	6293	6	33250272	33271965	60	0.1619	174	0.2791
Q16718	NDUFA5	-0.277707	-0.159364	0.194516	-1.32086	0.186552	0.277835	4698	7	123536997	123601651	134	0.162	226	0.1393
P02794	FTH1	-0.497047	-0.250473	0.210592	-2.38668	0.0170024	0.168111	2495	11	61964285	61967660	4	0.1658	163	0.7107
P13637	ATP1A3	-0.3709	-0.258007	0.173566	-1.80967	0.0703486	0.18901	478	19	41966582	41994276	17	0.1667	45	0.344
P48735	IDH2	-0.365492	-0.0892216	0.214556	-1.74744	0.0805629	0.196895	3418	15	90083978	90102554	51	0.1667	209	0.2874
Q15811	ITSN1	-0.393244	-0.169836	0.220062	-1.86699	0.0619048	0.184766	6453	21	33642400	33889305	441	0.167	503	0.2749
Q9NRD5	PICK1	-0.448902	-0.183217	0.224668	-2.13505	0.0327588	0.168111	9463	22	38056420	38075701	33	0.167	105	0.2891
Q9H3S7	PTPN23	-0.47272	-0.201148	0.231507	-2.25203	0.024322	0.168111	25930	3	47380982	47413441	31	0.1673	82	0.1754
Q9UBQ0	VPS29	-0.130449	0.0867415	0.097307	-0.639237	0.52267	0.564934	51699	12	110491523	110502142	16	0.1678	127	0.1872
Q504Y0	SLC39A12	-0.360525	-0.0804666	0.305364	-1.76581	0.0774296	0.194362	221074	10	17951839	18043292	412	0.1683	561	0.13
P63104	YWHAZ	-0.226581	0.0042928	0.121255	-1.08857	0.276344	0.349847	7534	8	100918576	100954596	81	0.1691	183	0.1866
Q9HD20	ATP13A1	-0.511194	-0.268297	0.26312	-2.43998	0.014689	0.168111	57130	19	19645198	19667823	64	0.1701	192	0.151
Q16643	DBN1	-0.24146	-0.0410513	0.183326	-1.16136	0.245496	0.326514	1627	5	177456613	177480336	35	0.1702	93	0.1238
P21291	CSRP1	-0.374848	-0.144537	0.125997	-1.78767	0.0738318	0.192473	1465	1	201483530	201507259	90	0.1704	296	0.2196
Q8IYB4	PEX5L	-0.539171	-0.25222	0.275093	-2.57074	0.010149	0.168111	51555	3	179794958	180037053	676	0.1706	815	0.1956
P28331	NDUFS1	-0.357646	-0.209676	0.23608	-1.70437	0.0883145	0.202373	4719	2	206123079	206159519	96	0.1708	217	0.219
Q13813	SPTAN1	-0.463671	-0.237675	0.213635	-2.21596	0.0266956	0.168111	6709	9	128552558	128633665	82	0.1714	150	0.2353
Q6PIU2	NCEH1	-0.0824865	0.0098494	0.104074	-0.395448	0.692513	0.710836	57552	3	172630645	172711218	225	0.1717	370	0.153
P06241	FYN	-0.428601	-0.184168	0.220525	-2.04007	0.0413446	0.168111	2534	6	111660332	111873452	590	0.1724	712	0.188
O14594	NCAN	-0.110956	-0.146468	0.0427783	-0.539725	0.589388	0.62155	1463	19	19211964	19252252	88	0.1726	203	0.03673
Q9H254	SPTBN4	-0.522735	-0.268204	0.222912	-2.51836	0.0117911	0.168111	57731	19	40466107	40576459	262	0.1727	402	0.1655
P17812	CTPS1	-0.462774	-0.150714	0.249281	-2.19882	0.027892	0.168111	1503	1	40979299	41012565	83	0.1733	242	0.08335
Q9HCM2	PLXNA4	-0.240975	-0.0430303	0.14848	-1.1504	0.24998	0.330015	91584	7	132123332	132648688	1576	0.1752	1669	0.09801
O15394	NCAM2	-0.435944	-0.27832	0.192873	-2.13117	0.0330768	0.168111	4685	21	20998315	21540630	1639	0.1759	1841	0.246
P14649	MYL6B	-0.329208	-0.196443	0.17079	-1.57162	0.11604	0.222937	140465	12	56152420	56157987	3	0.1767	55	0.05864
Q9GZN7	ROGDI	-0.326398	-0.233584	0.190557	-1.56668	0.117192	0.223124	79641	16	4796962	4802950	14	0.1767	138	0.4326
P10599	TXN	-0.234055	-0.228606	0.110199	-1.1512	0.24965	0.32985	7295	9	110243812	110256640	44	0.1785	191	0.6123
P48643	CCT5	-0.347081	-0.155128	0.160959	-1.65449	0.098031	0.208267	22948	5	10250170	10266389	78	0.1797	272	0.2652
Q9H2M9	RAB3GAP2	-0.514283	-0.299557	0.244272	-2.49349	0.0126506	0.168111	25782	1	220148268	220272501	248	0.1799	364	0.2815
P55039	DRG2	-0.34355	-0.116367	0.187134	-1.62952	0.103204	0.21223	1819	17	18087867	18107985	35	0.1802	128	0.2557
Q9Y376	CAB39	-0.272835	-0.16765	0.105887	-1.31039	0.190064	0.280071	51719	2	230712842	230821075	170	0.1809	294	0.1766
O14773	TPP1	-0.547348	-0.290388	0.255113	-2.63302	0.00846385	0.168111	1200	11	6612766	6619461	10	0.181	126	0.2624
Q9UHG3	PCYOX1	-0.297261	-0.21798	0.128299	-1.448	0.147618	0.248546	51449	2	70258099	70281185	42	0.1815	126	0.2048
Q5FWE3	PRRT3	-0.44943	-0.281964	0.257838	-2.15324	0.0313016	0.168111	285368	3	9945542	9952394	11	0.1815	109	0.2765
Q99962	SH3GL2	-0.11121	0.0828574	0.0879091	-0.542906	0.587195	0.619645	6456	9	17578954	17797129	1035	0.1819	1181	0.2371
Q15878	CACNA1E	-0.402115	-0.244743	0.195036	-1.93618	0.0528471	0.17761	777	1	181483311	181806784	727	0.1826	872	0.2105
P05129	PRKCG	-0.521861	-0.338063	0.258561	-2.55847	0.0105144	0.168111	5582	19	53882213	53907652	52	0.1833	126	0.4004
P04792	HSPB1	-0.244596	-0.0385573	0.124467	-1.16429	0.244309	0.325844	3315	7	76302558	76304297	1	0.1858	99	0.5231
P11586	MTHFD1	-0.451044	-0.183271	0.220039	-2.14676	0.0318141	0.168111	4522	14	64388041	64460007	204	0.1861	327	0.1574
Q9NRW7	VPS45	-0.335582	-0.115697	0.197169	-1.59315	0.111128	0.219535	11311	1	150067293	150145327	100	0.1864	181	0.2164
Q9Y5X3	SNX5	-0.194919	0.049705	0.112995	-0.947454	0.343409	0.409538	27131	20	17941596	17968991	87	0.1895	235	0.2027
P47985	UQCRFS1	-0.246381	-0.212657	0.179496	-1.17807	0.238769	0.321566	7386	19	29207260	29213229	12	0.1896	141	0.03774
O95202	LETM1	-0.0602833	-0.0915554	0.0735876	-0.287427	0.773786	0.78554	3954	4	1811479	1856247	21	0.1901	66	0.1834
Q17R89	ARHGAP44	-0.442538	-0.294967	0.227179	-2.15409	0.031235	0.168111	9912	17	12789512	12991643	783	0.1902	919	0.1232
P13645	KRT10	-0.319357	-0.248002	0.146607	-1.56516	0.117548	0.223133	3858	17	40818117	40822618	9	0.1906	132	0.6401
Q969G6	RFK	-0.263754	-0.162318	0.141783	-1.25807	0.208368	0.296033	55312	9	76385517	76394528	30	0.1909	189	0.2681
P51991	HNRNPA3	-0.271663	-0.121642	0.164771	-1.28893	0.197423	0.286059	220988	2	177212314	177223959	11	0.1914	64	0.2357
Q9UJF2	RASAL2	-0.547197	-0.354913	0.270465	-2.69006	0.00714457	0.168111	9462	1	178093729	178479514	574	0.1922	670	0.2034
Q92552	MRPS27	-0.466903	-0.262547	0.23753	-2.23454	0.0254489	0.168111	23107	5	72219409	72320257	140	0.1928	188	0.2074
Q00059	TFAM	-0.256303	-0.214287	0.128895	-1.24631	0.212653	0.29947	7019	10	58385143	58399230	43	0.193	153	0.5405
Q16555	DPYSL2	-0.402951	-0.15228	0.216341	-1.91035	0.0560903	0.180147	1808	8	26514193	26658177	626	0.1935	828	0.2203
Q3SXM5	HSDL1	-0.264635	-0.152878	0.181704	-1.25957	0.207825	0.295787	83693	16	84122139	84145195	63	0.1937	271	0.3494
P14927	UQCRB	-0.232886	-0.18843	0.165463	-1.11135	0.266421	0.341871	7381	8	96226676	96235634	13	0.1939	81	0.3217
P00558	PGK1	-0.298649	-0.0709226	0.158193	-1.42036	0.155504	0.254259	5230	23	78104169	78126827	30	0.1942	83	0.1426
P31689	DNAJA1	-0.298546	-0.18456	0.126031	-1.43439	0.151464	0.251498	3301	9	33025211	33039064	56	0.1947	277	0.1553
P22061	PCMT1	-0.231448	-0.149269	0.15435	-1.10325	0.269919	0.345256	5110	6	149749695	149811421	168	0.195	246	0.2032
P62241	RPS8	-0.319602	-0.244666	0.121863	-1.57576	0.115082	0.222615	6202	1	44775574	44778740	3	0.1952	93	0.2448
Q9Y265	RUVBL1	-0.329441	-0.191215	0.189115	-1.57096	0.116194	0.222937	8607	3	128064877	128153909	188	0.1963	274	0.2684
O43759	SYNGR1	-0.436349	-0.30011	0.172106	-2.16275	0.0305619	0.168111	9145	22	39349949	39385588	106	0.1971	279	0.2943
P23246	SFPQ	-0.264525	-0.160466	0.18497	-1.25973	0.20777	0.295787	6421	1	35176380	35193158	30	0.1978	148	0.07636
Q9Y2J2	EPB41L3	-0.375345	-0.188526	0.16819	-1.79093	0.0733067	0.192473	23136	18	5392381	5630666	653	0.1992	807	0.1665
P78324	SIRPA	-0.222677	-0.27015	0.102824	-1.11423	0.265184	0.3408	140885	20	1894117	1939896	181	0.1992	332	0.203
Q5H9R7	PPP6R3	-0.465895	-0.221193	0.208942	-2.22301	0.0262166	0.168111	55291	11	68460718	68615334	245	0.1995	389	0.2265
Q9BQE5	APOL2	-0.122987	-0.0665695	0.0949479	-0.583558	0.559519	0.595928	23780	22	36226209	36239954	66	0.1997	254	0.03914
O15269	SPTLC1	-0.403642	-0.22733	0.186821	-1.93511	0.0529784	0.17761	10558	9	92031134	92115474	329	0.2003	482	0.1825
O75146	HIP1R	-0.449351	-0.164506	0.183406	-2.14093	0.0322808	0.168111	9026	12	122834498	122862961	93	0.2005	249	0.269
P10606	COX5B	-0.235862	-0.149262	0.162003	-1.1239	0.261058	0.338237	1329	2	97646058	97648194	2	0.2006	55	0.8193
A0FGR8	ESYT2	-0.402703	-0.181857	0.228816	-1.91362	0.0556699	0.180147	57488	7	158730998	158829628	410	0.2008	561	0.3
P08195	SLC3A2	-0.138134	-0.126627	0.0751084	-0.66006	0.509216	0.55188	6520	11	62856012	62888883	31	0.202	133	0.1432
P49815	TSC2	-0.477189	-0.28516	0.220247	-2.31846	0.0204254	0.168111	7249	16	2047936	2088712	72	0.202	182	0.03112
Q15388	TOMM20	-0.462961	-0.33496	0.202859	-2.30315	0.0212718	0.168111	9804	1	235109341	235128941	43	0.2022	136	0.2313
Q9H845	ACAD9	-0.327732	-0.206733	0.19181	-1.56369	0.117893	0.223523	28976	3	128879490	128913114	145	0.2027	328	0.3002
Q9UH65	SWAP70	-0.285995	0.0028225	0.149182	-1.38228	0.166888	0.262182	23075	11	9664077	9752991	324	0.2039	420	0.169
Q9NRG7	SDR39U1	-0.274693	-0.0234847	0.180071	-1.32697	0.18452	0.27602	56948	14	24439766	24442905	19	0.2055	389	0.4471
P60880	SNAP25	-0.281063	-0.155234	0.134468	-1.34055	0.180069	0.273879	6616	20	10218829	10307420	196	0.2058	300	0.1443
O15530	PDPK1	-0.40374	-0.17643	0.223354	-1.91818	0.0550899	0.180147	5170	16	2537964	2603191	16	0.2059	36	0.0871
P62714	PPP2CB	-0.343373	-0.0830656	0.208866	-1.64232	0.100525	0.210276	5516	8	30785610	30812836	50	0.2063	152	0.2797
Q8IXJ6	SIRT2	-0.426307	-0.218983	0.131215	-2.07547	0.0379442	0.168111	22933	19	38878555	38899862	37	0.2063	138	0.3452
P04264	KRT1	-0.344275	-0.25066	0.126751	-1.69863	0.0893908	0.202552	3848	12	52674736	52680407	16	0.207	174	0.08216
Q15382	RHEB	-0.169347	-0.161549	0.0701906	-0.821316	0.411467	0.466427	6009	7	151466012	151519924	79	0.2095	184	0.3094
Q8WVJ2	NUDCD2	-0.265574	-0.0135929	0.129053	-1.27205	0.203356	0.292278	134492	5	163453488	163460137	9	0.2118	108	0.1708
P43304	GPD2	-0.233609	-0.200378	0.182378	-1.11468	0.264988	0.3408	2820	2	156435290	156586403	241	0.2119	309	0.1085
Q8TBM8	DNAJB14	-0.179891	-0.179975	0.140183	-0.859887	0.389852	0.44955	79982	4	99896248	99946726	73	0.213	171	0.2166
Q13409	DYNC1I2	-0.388232	-0.15617	0.165262	-1.85047	0.064247	0.186169	1781	2	171687409	171750158	117	0.2135	246	0.2226
Q00577	PURA	-0.209065	-0.116429	0.164858	-0.991384	0.3215	0.390671	5813	5	140114123	140119416	3	0.2137	41	0.1046
O95747	OXSR1	-0.445535	-0.280192	0.207436	-2.16953	0.0300442	0.168111	9943	3	38165260	38255488	113	0.2138	171	0.1802
O75382	TRIM3	-0.468266	-0.265638	0.234694	-2.24505	0.0247661	0.168111	10612	11	6448613	6474459	46	0.214	148	0.5751
P80723	BASP1	-0.190944	-0.16714	0.124605	-0.912631	0.361438	0.424723	10409	5	17216823	17276845	112	0.2144	303	0.003423
P26885	FKBP2	-0.184349	0.0624582	0.155872	-0.910138	0.362751	0.425642	2286	11	64240941	64244135	3	0.2154	100	0.949
P15882	CHN1	-0.32331	-0.109441	0.158368	-1.53286	0.125312	0.228706	1123	2	174799314	175005379	256	0.217	345	0.1882
Q9H2X9	SLC12A5	-0.428115	-0.239076	0.245868	-2.04164	0.0411886	0.168111	57468	20	46021690	46060150	119	0.217	243	0.2338
P36404	ARL2	-0.369534	-0.152662	0.192446	-1.75593	0.0791015	0.195499	402	11	65014113	65022185	19	0.2176	122	0.1865
O95741	CPNE6	-0.434694	-0.18724	0.237973	-2.06494	0.0389304	0.168111	9362	14	24070837	24078100	11	0.2176	115	0.281
P52907	CAPZA1	-0.323325	-0.201209	0.145842	-1.55399	0.120188	0.225547	829	1	112619453	112671619	79	0.2183	167	0.2529
Q9Y2L5	TRAPPC8	-0.285331	-0.160918	0.154047	-1.36056	0.173654	0.268602	22878	18	31829173	31943212	257	0.2184	417	0.2775
Q86YZ3	HRNR	-0.351661	-0.234514	0.118548	-1.72918	0.0837787	0.199378	388697	1	152212076	152224196	47	0.2187	180	0.1935
Q9Y4W6	AFG3L2	-0.320888	-0.214455	0.205521	-1.53072	0.125839	0.228717	10939	18	12328944	12377309	106	0.2209	234	0.3231
Q9HD42	CHMP1A	-0.369934	-0.359624	0.144656	-1.89338	0.0583093	0.181325	5119	16	89644431	89657785	59	0.2211	234	0.06217
Q99490	AGAP2	-0.4746	-0.318889	0.212563	-2.34154	0.0192055	0.168111	116986	12	57723761	57742201	25	0.2219	76	0.2566
Q08462	ADCY2	-0.522485	-0.272907	0.228326	-2.51759	0.011817	0.168111	108	5	7396230	7830081	1026	0.2225	1131	0.2495
Q6UXD5	SEZ6L2	-0.283016	-0.171491	0.177347	-1.34927	0.177253	0.272066	26470	16	29871159	29899264	18	0.2233	76	0.1177
Q92598	HSPH1	-0.238848	-0.0428952	0.131775	-1.1372	0.255457	0.333675	10808	13	31134974	31163109	57	0.2237	187	0.2996
Q96FC7	PHYHIPL	-0.24564	0.0216758	0.140809	-1.19175	0.233361	0.318193	84457	10	59173371	59247774	107	0.2248	184	0.2618
O76054	SEC14L2	-0.23086	0.0758573	0.128287	-1.1365	0.255749	0.333785	23541	22	30396941	30425303	71	0.2251	209	0.1244
O75746	SLC25A12	-0.243537	-0.180138	0.119882	-1.17032	0.241874	0.323845	8604	2	171783405	171894306	249	0.2263	366	0.218
Q13724	MOGS	-0.368699	-0.218762	0.227938	-1.75806	0.0787388	0.195313	7841	2	74461057	74465410	5	0.2265	46	0.1386
P07919	UQCRH	-0.278365	-0.105424	0.182447	-1.32129	0.186406	0.277835	7388	1	46303613	46316777	23	0.2265	68	0.1823
Q9Y6M9	NDUFB9	-0.125827	-0.105675	0.0993319	-0.59979	0.548647	0.586296	4715	8	124539102	124549986	29	0.2268	145	0.2064
P18433	PTPRA	-0.356103	-0.0740412	0.183758	-1.6989	0.0893397	0.202552	5786	20	2864195	3038669	266	0.2268	378	0.1464
Q00013	MPP1	-0.445562	-0.235389	0.221536	-2.12676	0.0334414	0.168111	4354	23	154778684	154805527	24	0.2269	57	0.1109
Q9Y512	SAMM50	-0.282882	-0.250936	0.167296	-1.37904	0.167886	0.262762	25813	22	43955381	43996532	142	0.2274	309	0.0745
O43583	DENR	-0.36391	-0.143045	0.205739	-1.72524	0.0844869	0.199652	8562	12	122752821	122771064	38	0.2275	103	0.3235
Q9NRY4	ARHGAP35	-0.414055	-0.240245	0.19866	-1.98759	0.0468589	0.168871	2909	19	46918567	47005077	89	0.2282	162	0.3311
P30043	BLVRB	-0.154678	0.0912534	0.117618	-0.763224	0.445331	0.495361	645	19	40447784	40465818	55	0.2299	178	0.3312
Q9HCC0	MCCC2	-0.356693	-0.288959	0.11625	-1.79072	0.0733398	0.192473	64087	5	71587288	71658706	150	0.2299	289	0.178
O95140	MFN2	-0.440557	-0.266896	0.232106	-2.11481	0.0344477	0.168111	9927	1	11980181	12013515	81	0.23	200	0.5128
Q9UQ80	PA2G4	-0.267627	-0.10841	0.169009	-1.26885	0.204496	0.293654	5036	12	56104319	56113910	7	0.2313	90	0.4991
Q147X3	NAA30	-0.409442	-0.103968	0.2452	-1.96222	0.0497392	0.173135	122830	14	57390553	57412748	23	0.2321	152	0.1888
A6NGB9	WIPF3	-0.509784	-0.240395	0.260225	-2.43063	0.0150738	0.168111	644150	7	29806554	29917066	365	0.2321	596	0.1082
O75368	SH3BGRL	-0.228247	-0.0885023	0.0893876	-1.08741	0.276859	0.350002	6451	23	81201804	81298547	81	0.2324	98	0.1843
Q9P121	NTM	-0.318859	-0.241351	0.119457	-1.57135	0.116104	0.222937	50863	11	131370361	132336822	2978	0.2326	3071	0.2478
P24821	TNC	-0.513099	-0.272933	0.139545	-2.54206	0.011021	0.168111	3371	9	115019575	115118257	293	0.2327	442	0.3544
Q969L2	MAL2	-0.34242	-0.261775	0.192073	-1.66299	0.0963168	0.206817	114569	8	119208371	119245673	74	0.2329	225	0.2442
P52943	CRIP2	-0.4857	-0.241367	0.179677	-2.34784	0.0188838	0.168111	1397	14	105472938	105480170	2	0.2335	41	0.3243
P55209	NAP1L1	-0.280303	-0.0501592	0.152402	-1.33695	0.18124	0.275032	4673	12	76044892	76084958	54	0.2339	117	0.2863
P21964	COMT	-0.256904	0.034388	0.172806	-1.26218	0.206886	0.295236	1312	22	19941740	19969975	114	0.2341	335	0.3022
Q04917	YWHAH	-0.205518	0.0248006	0.122917	-0.993634	0.320403	0.389633	7533	22	31944493	31957603	35	0.2349	180	0.1235
Q16566	CAMK4	-0.522534	-0.384619	0.209023	-2.64652	0.00813325	0.168111	814	5	111224249	111494886	696	0.2368	833	0.2432
Q9NUQ2	AGPAT5	-0.396533	-0.265551	0.185637	-1.93308	0.0532276	0.177691	55326	8	6708357	6761503	152	0.2375	325	0.2665
O75077	ADAM23	-0.294338	-0.206373	0.122075	-1.4297	0.152806	0.252786	8745	2	206443544	206621130	362	0.238	441	0.2657
O75334	PPFIA2	-0.530282	-0.307674	0.240502	-2.58342	0.00978364	0.168111	8499	12	81257975	81759548	1171	0.2401	1312	0.2276
P02689	PMP2	-0.399516	-0.168901	0.130199	-1.90836	0.0563468	0.180147	5375	8	81440326	81447484	12	0.2405	146	0.08787
Q9UKU0	ACSL6	-0.265803	-0.0714045	0.162477	-1.2647	0.205981	0.294512	23305	5	131949973	132012068	92	0.2407	178	0.3026
Q9Y6R1	SLC4A4	-0.411175	-0.288106	0.170431	-2.03056	0.0423017	0.168111	8671	4	71187286	71572087	673	0.2408	767	0.1992
Q96JB5	CDK5RAP3	-0.358174	-0.16119	0.175068	-1.70689	0.0878436	0.202373	80279	17	47967904	47981786	38	0.241	160	0.469
O43670	ZNF207	-0.34487	-0.181457	0.16596	-1.64497	0.0999776	0.210176	7756	17	32350138	32408085	80	0.2418	134	0.2615
O00471	EXOC5	-0.451968	-0.191615	0.236334	-2.14926	0.0316153	0.168111	10640	14	57202476	57268899	105	0.2424	157	0.2171
P42224	STAT1	-0.505827	-0.281696	0.224021	-2.45061	0.0142627	0.168111	6772	2	190969036	191014250	99	0.2431	193	0.1702
Q9H6U6	BCAS3	-0.415493	-0.241014	0.218974	-1.9853	0.0471129	0.169059	54828	17	60677811	61392838	1098	0.2453	1144	0.2376
Q96RR4	CAMKK2	-0.474664	-0.302042	0.204018	-2.33354	0.0196211	0.168111	10645	12	121237692	121298308	165	0.2459	270	0.3179
P30050	RPL12	-0.311831	-0.263439	0.127727	-1.54487	0.12238	0.22641	6136	9	127447674	127451432	7	0.2474	132	0.4506
Q08AM6	VAC14	-0.360234	-0.110531	0.212112	-1.71412	0.0865079	0.201391	55697	16	70687439	70801166	236	0.2474	320	0.3178
Q5T442	GJC2	-0.446946	-0.24208	0.14416	-2.18713	0.0287342	0.168111	57165	1	228149714	228159826	13	0.2484	62	0.1047
Q92905	COPS5	-0.233609	0.000812347	0.133057	-1.12417	0.260943	0.338237	10987	8	67043079	67062327	30	0.2485	102	0.3997
P17600	SYN1	-0.31201	-0.178372	0.18007	-1.48769	0.136834	0.241986	6853	23	47571901	47619857	68	0.2486	111	0.4206
Q13492	PICALM	-0.475518	-0.252553	0.207395	-2.28765	0.0221594	0.168111	8301	11	85957171	86069881	321	0.249	455	0.2477
O15145	ARPC3	-0.239434	-0.103745	0.125175	-1.13873	0.254816	0.333675	10094	12	110434890	110450411	46	0.2491	148	0.2289
P62269	RPS18	-0.167095	-0.20097	0.0290602	-0.832656	0.40504	0.460769	6222	6	33272075	33276504	20	0.2501	132	0.2301
O75381	PEX14	-0.301795	-0.209885	0.158888	-1.44949	0.147202	0.248546	5195	1	10474946	10630758	387	0.2526	465	0.2477
Q9H3K2	GHITM	-0.115116	-0.112547	0.0739901	-0.549233	0.582846	0.615867	27069	10	84139429	84153555	43	0.2529	224	0.5679
Q9Y678	COPG1	-0.40822	-0.17677	0.21408	-1.94229	0.052104	0.175896	22820	3	129249575	129277773	68	0.2534	161	0.2766
P20336	RAB3A	-0.152305	-0.0613219	0.0953632	-0.722246	0.470144	0.517223	5864	19	18196799	18204064	14	0.2544	120	0.5518
O00487	PSMD14	-0.375171	-0.135633	0.217095	-1.78033	0.0750244	0.193471	10213	2	161308275	161411717	134	0.2546	200	0.1837
P60953	CDC42	-0.357073	-0.184789	0.144936	-1.70722	0.0877837	0.202373	998	1	22052627	22092943	96	0.256	310	0.3235
P07196	NEFL	-0.402903	-0.227644	0.145568	-1.95924	0.050087	0.173895	4747	8	24950955	24956869	10	0.2566	148	0.451
P50993	ATP1A2	-0.291498	-0.258607	0.111402	-1.44828	0.147542	0.248546	477	1	160115730	160143591	91	0.2579	203	0.29
P27105	STOM	-0.285676	-0.182598	0.164044	-1.36285	0.17293	0.267792	2040	9	121338988	121370304	73	0.258	159	0.5104
P09497	CLTB	-0.0592221	0.0980552	0.0821108	-0.290129	0.771718	0.783937	1212	5	176392455	176416569	54	0.2589	151	0.2507
Q92614	MYO18A	-0.501675	-0.264615	0.226313	-2.4105	0.0159316	0.168111	399687	17	29073510	29180389	239	0.259	325	0.3084
P62244	RPS15A	-0.28231	-0.235644	0.109438	-1.39232	0.163829	0.260696	6210	16	18782955	18790334	5	0.2593	102	0.3159
Q99798	ACO2	-0.376742	-0.156777	0.164195	-1.79581	0.0725264	0.191651	50	22	41469125	41528989	56	0.2624	133	0.2819
Q674X7	KAZN	-0.41966	-0.342169	0.162384	-2.12098	0.0339254	0.168111	23254	1	13893515	15118048	4525	0.2624	4716	0.3165
O00401	WASL	-0.444608	-0.268087	0.210408	-2.15136	0.0314497	0.168111	8976	7	123681927	123749071	144	0.2625	265	0.2989
O94856	NFASC	-0.444333	-0.277264	0.165209	-2.18929	0.0285775	0.168111	23114	1	204828654	205022822	537	0.2645	660	0.2942
O75122	CLASP2	-0.522614	-0.245542	0.233347	-2.49474	0.0126059	0.168111	23122	3	33496245	33718356	364	0.2659	463	0.2683
Q02218	OGDH	-0.394169	-0.195262	0.258857	-1.86991	0.0614976	0.184723	4967	7	44606522	44709070	199	0.2665	315	0.2841
P68871	HBB	-0.352394	-0.275682	0.0057987	-1.82328	0.0682627	0.186849	3043	11	5225466	5227071	5	0.2666	163	0.4612
P42263	GRIA3	-0.409724	-0.3167	0.198724	-2.02757	0.042606	0.168111	2892	23	123184243	123490915	397	0.2668	492	0.3791
Q96GW7	BCAN	-0.141455	-0.135138	0.0607339	-0.680356	0.49628	0.540691	63827	1	156641948	156659532	29	0.2673	100	0.05617
Q9NPQ8	RIC8A	-0.429601	-0.192346	0.17662	-2.04943	0.0404215	0.168111	60626	11	207511	215175	24	0.2677	127	0.1742
Q9NZ56	FMN2	-0.482868	-0.255721	0.235291	-2.30812	0.0209939	0.168111	56776	1	240091885	240475189	1212	0.2678	1439	0.3228
P43004	SLC1A2	-0.0917191	-0.0840407	0.049916	-0.437413	0.661812	0.683546	6506	11	35251205	35420063	507	0.2679	630	0.3601
Q96F07	CYFIP2	-0.346434	-0.185072	0.207372	-1.65074	0.0987928	0.209331	26999	5	157266080	157395598	406	0.2686	539	0.2371
Q6U841	SLC4A10	-0.443823	-0.292381	0.191789	-2.18198	0.0291125	0.168111	57282	2	161624335	161985276	795	0.2692	851	0.285
Q9NQP4	PFDN4	-0.249811	-0.104853	0.115521	-1.18962	0.234198	0.318351	5203	20	54207963	54219953	27	0.2706	283	0.4309
Q9NTK5	OLA1	-0.186299	0.0915577	0.138464	-0.924483	0.355236	0.419587	29789	2	174072447	174248637	494	0.2718	622	0.2177
Q8WXG6	MADD	-0.31539	-0.176334	0.175503	-1.50385	0.132621	0.237151	8567	11	47269376	47330031	137	0.2722	245	0.4062
Q92499	DDX1	-0.470358	-0.231029	0.195299	-2.25267	0.0242816	0.168111	1653	2	15591621	15631111	119	0.2733	235	0.4404
Q4G176	ACSF3	-0.440302	-0.229777	0.231594	-2.09988	0.0357407	0.168111	197322	16	89093809	89155846	311	0.2737	521	0.3016
Q8TD22	SFXN5	-0.132596	-0.0929226	0.0362822	-0.633245	0.526575	0.568007	94097	2	72942036	73071836	219	0.2743	301	0.2855
Q9H425	C1orf198	-0.429289	-0.193361	0.170068	-2.04887	0.0404766	0.168111	84886	1	230837119	230869589	111	0.2757	244	0.2674
Q9NVH1	DNAJC11	-0.325184	-0.228043	0.17303	-1.56634	0.117272	0.223124	55735	1	6634168	6701906	143	0.2766	263	0.205
Q96SB3	PPP1R9B	-0.467683	-0.324343	0.209748	-2.31349	0.0206971	0.168111	84687	17	50133735	50151022	20	0.2771	109	0.6395
O00264	PGRMC1	-0.153358	0.0404725	0.117117	-0.744015	0.456869	0.505521	10857	23	119236245	119244466	3	0.2776	63	0.3019
Q9H1Z4	WDR13	-0.373803	-0.178884	0.174864	-1.78247	0.0746746	0.193471	64743	23	48590043	48605194	22	0.2777	112	0.506
O75380	NDUFS6	-0.0924744	-0.0935921	0.107196	-0.44015	0.659829	0.681936	4726	5	1801382	1816051	54	0.2791	249	0.1343
P39023	RPL3	-0.318798	-0.276592	0.134813	-1.58352	0.113304	0.221904	6122	22	39312882	39319665	23	0.2795	221	0.3127
Q99784	OLFM1	-0.189392	-0.253914	0.0739451	-0.950294	0.341964	0.408422	10439	9	135075243	135121184	195	0.2796	472	0.02701
P11137	MAP2	-0.512459	-0.258727	0.233468	-2.45209	0.0142041	0.168111	4133	2	209424047	209734118	727	0.2816	894	0.3204
Q9Y6G9	DYNC1LI1	-0.45147	-0.215524	0.223727	-2.15274	0.0313406	0.168111	51143	3	32525971	32570874	82	0.2818	239	0.5863
Q5T2T1	MPP7	-0.283921	-0.182719	0.117366	-1.36699	0.171631	0.266759	143098	10	28050993	28303061	911	0.2819	1102	0.2438
Q8NCB2	CAMKV	-0.410856	-0.291906	0.214269	-2.00582	0.0448768	0.168111	79012	3	49857981	49869955	21	0.2822	78	0.3044
Q9Y263	PLAA	-0.422068	-0.130637	0.214231	-2.00342	0.0451342	0.168111	9373	9	26903370	26947470	154	0.2828	316	0.3639
Q9NZN3	EHD3	-0.252838	-0.0217315	0.151145	-1.21401	0.224746	0.31077	30845	2	31234014	31269451	105	0.2834	336	0.4592
O60331	PIP5K1C	-0.423152	-0.256734	0.220092	-2.03077	0.0422804	0.168111	23396	19	3630181	3700492	175	0.2838	315	0.4256
P20020	ATP2B1	-0.220961	-0.0367513	0.138432	-1.05445	0.29168	0.363072	490	12	89588049	89709353	197	0.2843	282	0.2775
O95886	DLGAP3	-0.483704	-0.3025	0.239198	-2.35243	0.0186525	0.168111	58512	1	34862120	34929585	98	0.2853	155	0.4115
Q6IBS0	TWF2	-0.177683	0.0152102	0.109583	-0.854022	0.393094	0.451885	11344	3	52228610	52239167	25	0.2876	86	0.1515
Q9NV70	EXOC1	-0.500837	-0.207687	0.233916	-2.3867	0.0170015	0.168111	55763	4	55853636	55905078	111	0.2889	245	0.1761
Q9UPY8	MAPRE3	-0.257547	-0.0351891	0.141214	-1.23008	0.218668	0.305792	22924	2	26970371	27027219	54	0.2902	137	0.3036
P84098	RPL19	-0.3021	-0.256632	0.133434	-1.49088	0.135996	0.240933	6143	17	39200283	39204727	4	0.2903	110	0.8272
Q8N414	PGBD5	-0.397192	-0.274553	0.199582	-1.93462	0.0530393	0.17761	79605	1	230321646	230425928	395	0.2906	534	0.276
P42704	LRPPRC	-0.45589	-0.189969	0.249573	-2.16319	0.030528	0.168111	10128	2	43886224	43996005	288	0.292	513	0.3118
Q9NSE4	IARS2	-0.42168	-0.134377	0.21844	-2.00149	0.0453409	0.168111	55699	1	220094113	220148041	119	0.2927	210	0.2861
P11233	RALA	-0.306101	-0.203744	0.147276	-1.47205	0.141009	0.246507	5898	7	39622955	39708124	172	0.2932	291	0.3084
Q14203	DCTN1	-0.390401	-0.0852489	0.189856	-1.86011	0.0628712	0.184766	1639	2	74361154	74392087	37	0.2937	94	0.1193
Q9BTV5	FSD1	-0.218776	-0.014683	0.139948	-1.04994	0.293748	0.36514	79187	19	4304594	4323846	52	0.2947	209	0.4638
Q08257	CRYZ	-0.146475	-0.051811	0.122508	-0.695774	0.486571	0.532374	1429	1	74705482	74733408	77	0.2959	214	0.2106
P13073	COX4I1	-0.229637	-0.167798	0.157093	-1.0951	0.273474	0.347915	1327	16	85799567	85807002	14	0.296	131	0.395
O75390	CS	-0.421563	-0.198517	0.219887	-2.00919	0.0445184	0.168111	1431	12	56271699	56300391	45	0.2975	114	0.2692
O00571	DDX3X	-0.434746	-0.192875	0.221649	-2.07106	0.0383548	0.168111	1654	23	41333308	41364472	53	0.2975	142	0.263
P32189	GK	-0.405094	-0.307918	0.205072	-1.99517	0.0460261	0.168111	2710	23	30653359	30731462	107	0.2978	231	0.2277
P46459	NSF	-0.418926	-0.260512	0.221987	-2.01236	0.044184	0.168111	4905	17	46590669	46757464	79	0.2981	93	0.2659
P09471	GNAO1	-0.274102	-0.160878	0.125533	-1.30862	0.190666	0.280577	2775	16	56191339	56357444	410	0.2983	518	0.1939
O76024	WFS1	-0.467188	-0.238525	0.270315	-2.22662	0.0259741	0.168111	7466	4	6269850	6303265	154	0.2988	300	0.4148
Q92932	PTPRN2	-0.357706	-0.161684	0.221866	-1.69621	0.0898488	0.202552	5799	7	157539056	158587796	3955	0.2996	4088	0.245
Q8WXF7	ATL1	-0.244295	-0.0469146	0.137391	-1.16322	0.244743	0.326052	51062	14	50533082	50633068	170	0.3008	257	0.3845
P30044	PRDX5	-0.181394	0.0679169	0.157437	-0.897563	0.36942	0.431259	25824	11	64318088	64321823	5	0.3025	68	0.1138
Q9P2B4	CTTNBP2NL	-0.539491	-0.275698	0.254796	-2.58142	0.00984048	0.168111	55917	1	112396178	112461164	155	0.3026	241	0.3851
P30041	PRDX6	-0.288019	-0.213858	0.116704	-1.40595	0.159742	0.25822	9588	1	173477347	173488807	17	0.303	103	0.279
O43865	AHCYL1	-0.505016	-0.311055	0.211172	-2.48575	0.0129289	0.168111	10768	1	109984741	110023742	32	0.3031	81	0.335
Q9UN86	G3BP2	-0.111908	-0.0998999	0.113773	-0.532711	0.594234	0.625018	9908	4	75642769	75724525	207	0.3036	293	0.2059
Q02543	RPL18A	-0.360548	-0.264918	0.130459	-1.78579	0.0741349	0.192674	6142	19	17859878	17863324	9	0.304	139	0.6965
Q86TX2	ACOT1	-0.27116	0.0181411	0.19504	-1.33287	0.182576	0.275534	641371	14	73493234	73543799	85	0.3055	173	0.3883
P18507	GABRG2	-0.292389	-0.217449	0.191645	-1.39652	0.162559	0.259965	2566	5	162067642	162155539	155	0.3055	242	0.3707
Q96QG7	MTMR9	-0.472507	-0.263695	0.194445	-2.29479	0.0217462	0.168111	66036	8	11284491	11328146	124	0.3056	297	0.08201
P43897	TSFM	-0.418491	-0.26095	0.231351	-2.00506	0.044958	0.168111	10102	12	57782745	57802856	25	0.3068	75	0.3234
Q9NX63	CHCHD3	-0.221611	-0.205984	0.121945	-1.07631	0.281792	0.354784	54927	7	132784862	133082079	496	0.3077	606	0.3042
Q93009	USP7	-0.332298	-0.0756	0.211492	-1.59312	0.111136	0.219535	7874	16	8892094	8963484	180	0.3099	334	0.3899
Q13509	TUBB3	-0.366495	-0.121816	0.172018	-1.73786	0.0822378	0.198605	10381	16	89922009	89936097	48	0.3105	212	0.1857
P11142	HSPA8	-0.388677	-0.210741	0.186475	-1.85587	0.0634736	0.185258	3312	11	123057492	123062366	23	0.3126	199	0.4937
Q96JJ7	TMX3	-0.0759869	0.104423	0.10266	-0.375097	0.707589	0.724353	54495	18	68673688	68715298	70	0.3139	135	0.2637
P46821	MAP1B	-0.45781	-0.257263	0.192012	-2.21903	0.0264861	0.168111	4131	5	72107291	72209570	207	0.3147	368	0.2785
Q96L92	SNX27	-0.43753	-0.182992	0.226275	-2.08036	0.0374941	0.168111	81609	1	151611984	151699083	122	0.3154	207	0.3447
Q14832	GRM3	-0.397679	-0.231002	0.210299	-1.89911	0.0575519	0.180793	2913	7	86643914	86864879	439	0.3155	554	0.2968
Q8WUM4	PDCD6IP	-0.24909	-0.0396837	0.167793	-1.19453	0.232273	0.317347	10015	3	33798571	33869707	234	0.3158	331	0.2985
Q96JJ3	ELMO2	-0.453432	-0.249741	0.218966	-2.1715	0.0298949	0.168111	63916	20	46366049	46407051	38	0.316	74	0.2798
P62140	PPP1CB	-0.397116	-0.144878	0.195686	-1.88388	0.0595824	0.182782	5500	2	28751748	28802940	110	0.316	175	0.2533
Q9Y5K5	UCHL5	-0.381323	-0.20647	0.167167	-1.82495	0.0680104	0.186476	51377	1	193012366	193060107	73	0.3166	144	0.3248
P61604	HSPE1	-0.306241	-0.161883	0.142029	-1.46067	0.144108	0.248374	3336	2	197499997	197503463	2	0.3178	53	0.5516
P09001	MRPL3	-0.267098	-0.231401	0.14229	-1.3023	0.192817	0.282188	11222	3	131462201	131503016	78	0.3179	163	0.3654
Q7Z6G8	ANKS1B	-0.422696	-0.299278	0.225988	-2.06197	0.0392119	0.168111	56899	12	98729904	99984727	2992	0.318	3126	0.2794
Q15149	PLEC	-0.52655	-0.209961	0.235594	-2.50939	0.012095	0.168111	5339	8	143915147	143976792	157	0.3181	232	0.3086
P0CG08	GPR89B	-0.326214	-0.174722	0.195788	-1.55428	0.120119	0.225547	51463	1	147928393	147993521	32	0.3182	122	0.5894
Q13033	STRN3	-0.425936	-0.219379	0.176457	-2.0422	0.0411332	0.168111	29966	14	30893779	31026528	303	0.3183	429	0.2322
P51553	IDH3G	-0.307621	-0.0502066	0.179962	-1.47491	0.140238	0.246377	3421	23	153785766	153794523	12	0.3188	80	0.3308
Q6P1M0	SLC27A4	-0.467192	-0.26073	0.238435	-2.23445	0.0254549	0.168111	10999	9	128340560	128361470	48	0.3192	129	0.39
P08243	ASNS	-0.293974	-0.28999	0.12678	-1.47143	0.141176	0.246507	440	7	97852117	97872542	65	0.3195	193	0.3769
Q9Y6C9	MTCH2	-0.27519	-0.175937	0.169648	-1.31227	0.189431	0.279785	23788	11	47605204	47642654	38	0.3195	112	0.2884
P62701	RPS4X	-0.28474	-0.204622	0.0876026	-1.39741	0.162293	0.259798	6191	23	72272603	72277291	4	0.3204	83	0.5756
P42858	HTT	-0.387398	-0.122123	0.208166	-1.8397	0.0658144	0.186184	3064	4	3074510	3243960	366	0.3207	544	0.2986
Q13232	NME3	-0.264611	-0.117996	0.165752	-1.25489	0.209519	0.296095	4832	16	1770320	1771758	1	0.3213	239	0.6348
Q9H2G2	SLK	-0.226035	-0.129386	0.143128	-1.07669	0.281622	0.354784	9748	10	103967182	104029233	171	0.3216	305	0.4791
P61026	RAB10	-0.268214	-0.197976	0.119218	-1.2993	0.193844	0.282917	10890	2	26033860	26137454	173	0.3219	268	0.3072
O43169	CYB5B	-0.085545	-0.114239	0.0606053	-0.408692	0.682766	0.702902	80777	16	69424595	69466264	130	0.3223	240	0.3593
P06756	ITGAV	-0.20352	-0.0709132	0.124203	-0.965026	0.334533	0.402243	3685	2	186590063	186680902	141	0.3228	228	0.5061
P62760	VSNL1	-0.321778	-0.195043	0.138126	-1.54655	0.121974	0.22592	7447	2	17540540	17656439	401	0.3228	527	0.3792
P60981	DSTN	-0.28481	-0.00566292	0.180268	-1.38361	0.166481	0.262057	11034	20	17569173	17608242	83	0.324	211	0.5883
P67775	PPP2CA	-0.361163	-0.0368302	0.216558	-1.75326	0.0795601	0.195728	5515	5	134196457	134226259	90	0.3241	178	0.3435
P51572	BCAP31	0.185904	0.119174	-0.0427878	0.889541	0.373714	0.435637	10134	23	153700492	153724746	14	0.3245	73	0.4598
Q13526	PIN1	-0.299988	-0.135279	0.144298	-1.42948	0.15287	0.252786	5300	19	9835207	9849689	21	0.3248	90	0.07057
P09669	COX6C	-0.207364	-0.135129	0.17295	-0.98499	0.324631	0.393487	1345	8	99877995	99894014	42	0.3251	105	0.4034
O14976	GAK	-0.41258	-0.231281	0.226694	-1.96811	0.0490567	0.172838	2580	4	849277	932390	357	0.3252	478	0.3725
O96011	PEX11B	-0.24778	-0.117172	0.11828	-1.1809	0.237644	0.320661	8799	1	145911348	145918924	2	0.3262	31	0.3886
Q9Y287	ITM2B	-0.307494	-0.160624	0.164466	-1.46593	0.142669	0.247711	9445	13	48233138	48262096	31	0.3265	125	0.5197
P61764	STXBP1	-0.225668	0.00897567	0.137839	-1.08975	0.275823	0.349847	6812	9	127612207	127692716	77	0.3281	140	0.4112
P46782	RPS5	-0.290147	-0.233419	0.121214	-1.42503	0.15415	0.253689	6193	19	58387269	58394804	22	0.3284	140	0.5559
P02686	MBP	-0.395598	-0.205705	0.111866	-1.92767	0.0538986	0.178623	4155	18	76978833	77133708	704	0.3285	903	0.2423
Q9BUF5	TUBB6	-0.450555	-0.214216	0.223196	-2.14835	0.0316877	0.168111	84617	18	12307669	12329826	65	0.3287	238	0.1883
Q9Y6T7	DGKB	-0.336537	-0.248156	0.166854	-1.63896	0.101223	0.210314	1607	7	14145049	14974777	2640	0.3289	2775	0.3419
Q5SW79	CEP170	-0.594101	-0.277962	0.277511	-2.83517	0.00458066	0.168111	9859	1	243124428	243255406	168	0.329	234	0.2143
P18669	PGAM1	-0.140325	0.0976805	0.102153	-0.691037	0.489544	0.534896	5223	10	97426270	97433441	11	0.3303	148	0.7412
Q86WG3	ATCAY	-0.170861	0.0416072	0.119179	-0.829668	0.406728	0.462034	85300	19	3880620	3928082	109	0.3307	222	0.4653
Q9BWM7	SFXN3	-0.175295	-0.146611	0.0599062	-0.847613	0.396655	0.454124	81855	10	101031229	101041241	14	0.3307	120	0.6416
P40227	CCT6A	-0.374913	-0.160752	0.16835	-1.78714	0.0739173	0.192473	908	7	56051685	56063989	31	0.3314	144	0.1757
Q00765	REEP5	-0.148332	-0.152795	0.00796617	-0.731047	0.464751	0.512681	7905	5	112876384	112922334	170	0.3319	271	0.4311
Q9BT78	COPS4	-0.22069	0.015964	0.114935	-1.06221	0.288141	0.359683	51138	4	83035086	83075818	34	0.3323	100	0.1596
Q8TDC3	BRSK1	-0.548406	-0.352529	0.277932	-2.68763	0.00719697	0.168111	84446	19	55284166	55312562	86	0.3338	200	0.3997
P82930	MRPS34	-0.305214	-0.208386	0.154896	-1.46693	0.142398	0.247711	65993	16	1771895	1773139	4	0.3339	247	0.6058
P61163	ACTR1A	-0.341876	-0.0997463	0.168813	-1.62191	0.104825	0.214066	10121	10	102479229	102502755	72	0.3344	202	0.3058
Q8N126	CADM3	-0.22388	-0.186001	0.0359776	-1.1075	0.268079	0.343176	57863	1	159171587	159203142	68	0.3345	152	0.2497
Q96EY1	DNAJA3	-0.214069	-0.170802	0.116646	-1.02606	0.304865	0.375578	9093	16	4425805	4456775	66	0.3346	155	0.3646
P51149	RAB7A	-0.337531	-0.199409	0.139895	-1.62423	0.104329	0.214019	7879	3	128726136	128814798	258	0.3353	398	0.305
Q9ULD0	OGDHL	-0.414422	-0.197916	0.267873	-1.96506	0.0494085	0.173038	55753	10	49734641	49762379	82	0.3361	206	0.5774
O95057	DIRAS1	-0.279856	-0.236659	0.121188	-1.37613	0.168784	0.263612	148252	19	2714567	2721392	16	0.3367	166	0.2394
P56181	NDUFV3	-0.0859386	-0.124497	0.0943191	-0.409915	0.681869	0.702452	4731	21	42893268	42909670	71	0.3377	297	0.3635
Q15334	LLGL1	-0.381361	-0.191865	0.135567	-1.83206	0.0669442	0.186476	3996	17	18225593	18244875	49	0.3396	165	0.128
Q99259	GAD1	-0.244685	-0.0273196	0.165492	-1.17672	0.23931	0.322024	2571	2	170813210	170861151	118	0.3399	236	0.1971
P40925	MDH1	-0.315296	-0.2247	0.0925343	-1.55634	0.119629	0.225547	4190	2	63588609	63607197	36	0.3399	127	0.3662
Q8IWA5	SLC44A2	-0.422479	-0.258344	0.151434	-2.07562	0.0379307	0.168111	57153	19	10602445	10644559	117	0.3401	258	0.4553
P53396	ACLY	-0.281424	-0.0386844	0.130427	-1.34067	0.180029	0.273879	47	17	41866916	41930542	120	0.3407	207	0.3489
Q9P0L0	VAPA	-0.474094	-0.27689	0.219403	-2.29571	0.0216938	0.168111	9218	18	9913958	9960021	129	0.341	256	0.3064
P13647	KRT5	-0.337452	-0.255956	0.137055	-1.66331	0.0962531	0.206817	3852	12	52514575	52520459	28	0.3421	223	0.3556
P55036	PSMD4	-0.319401	-0.111753	0.186638	-1.51562	0.129618	0.232729	5710	1	151254700	151267479	16	0.3427	69	0.4598
P06748	NPM1	-0.370674	-0.21842	0.174917	-1.7774	0.0755048	0.193599	4869	5	171387648	171410884	61	0.343	202	0.3193
Q9H3P7	ACBD3	-0.395889	-0.185341	0.201532	-1.88699	0.0591633	0.182613	64746	1	226144679	226186722	100	0.3438	223	0.2897
Q13045	FLII	-0.500682	-0.234621	0.24165	-2.38764	0.0169582	0.168111	2314	17	18244815	18258916	18	0.3439	118	0.221
P31930	UQCRC1	-0.372299	-0.235877	0.243786	-1.77538	0.0758364	0.193599	7384	3	48598999	48609665	10	0.3442	62	0.4213
Q96KG9	SCYL1	-0.410093	-0.107806	0.241507	-1.96204	0.0497601	0.173135	57410	11	65525065	65538711	17	0.3447	59	0.2932
P09417	QDPR	-0.505455	-0.233446	0.2408	-2.41036	0.0159378	0.168111	5860	4	17486393	17512234	107	0.3454	297	0.147
P49841	GSK3B	-0.246146	-0.161431	0.165426	-1.17347	0.24061	0.322691	2932	3	119821321	120094417	388	0.3455	502	0.4285
P62424	RPL7A	-0.326648	-0.264714	0.124109	-1.62062	0.105102	0.214066	6130	9	133348214	133351425	9	0.3458	150	0.06862
P04179	SOD2	-0.272095	-0.208027	0.161869	-1.30471	0.191995	0.282015	6648	6	159679116	159693321	57	0.3468	187	0.3074
Q15048	LRRC14	-0.399675	-0.195105	0.222066	-1.90423	0.0568825	0.180315	9684	8	144517965	144525178	10	0.3473	67	0.3729
P11274	BCR	-0.523548	-0.317589	0.272439	-2.53343	0.0112963	0.168111	613	22	23180365	23318037	398	0.3483	556	0.2564
Q4V328	GRIPAP1	-0.458184	-0.305344	0.230118	-2.23759	0.0252493	0.168111	56850	23	48973720	49002264	29	0.3496	49	0.3889
Q96DA6	DNAJC19	-0.17554	-0.169681	0.1048	-0.844098	0.398616	0.455075	131118	3	180983709	180989774	8	0.3506	90	0.6922
P40939	HADHA	-0.429029	-0.202553	0.265654	-2.03569	0.0417835	0.168111	3030	2	26190635	26244726	102	0.3509	170	0.3455
Q13501	SQSTM1	-0.238809	0.00627099	0.106014	-1.14429	0.252507	0.331712	8878	5	179806388	179838078	128	0.3517	262	0.1649
Q9BQI5	SGIP1	-0.267978	-0.22247	0.152197	-1.29712	0.194591	0.28375	84251	1	66533311	66748999	735	0.3524	935	0.4217
Q9BWQ8	FAIM2	-0.205079	-0.119648	0.102267	-0.977891	0.32813	0.396027	23017	12	49866896	49903977	102	0.3525	220	0.3433
Q9Y4F5	CEP170B	-0.465048	-0.29846	0.211629	-2.27803	0.022726	0.168111	283638	14	104865313	104896770	138	0.3526	307	0.4648
Q92743	HTRA1	-0.215895	-0.0274292	0.103898	-1.02682	0.304506	0.375425	5654	10	122461525	122514908	187	0.3527	343	0.4568
O94819	KBTBD11	-0.404758	-0.143664	0.216079	-1.91928	0.0549503	0.180147	9920	8	1970710	2006943	198	0.3532	389	0.4641
P27348	YWHAQ	-0.260361	0.00817399	0.133319	-1.25565	0.209246	0.296095	10971	2	9583967	9631055	94	0.3534	228	0.5025
P17174	GOT1	-0.406668	-0.262264	0.154692	-1.99891	0.0456202	0.168111	2805	10	99396870	99430773	58	0.3542	148	0.3962
Q9P1A6	DLGAP2	-0.522762	-0.318511	0.231871	-2.56454	0.0103322	0.168111	9228	8	1019561	1708476	3919	0.3555	4080	0.3614
P84095	RHOG	-0.442973	-0.20467	0.162059	-2.1216	0.0338733	0.168111	391	11	3826978	3840983	47	0.3559	148	0.4118
Q9H444	CHMP4B	-0.125648	-0.229958	0.024115	-0.634501	0.525755	0.567504	128866	20	33811304	33854367	41	0.3568	107	0.4166
Q9H1E5	TMX4	-0.338275	-0.120422	0.23097	-1.61098	0.107186	0.214636	56255	20	7977353	8019829	131	0.3572	272	0.2641
P55084	HADHB	-0.290665	-0.167026	0.170329	-1.38579	0.165812	0.26196	3032	2	26244748	26290465	67	0.3587	153	0.3238
P33121	ACSL1	-0.457524	-0.116264	0.246895	-2.18678	0.0287601	0.168111	2180	4	184755595	184826114	210	0.36	422	0.225
Q92930	RAB8B	-0.273822	-0.127769	0.146234	-1.30374	0.192325	0.282187	51762	15	63189529	63267776	174	0.3604	275	0.2668
Q14155	ARHGEF7	-0.416749	-0.221604	0.185756	-1.99471	0.0460764	0.168111	8874	13	111115277	111305734	552	0.363	719	0.4725
Q9UL26	RAB22A	-0.378554	-0.205544	0.201333	-1.80539	0.0710156	0.18987	57403	20	58309715	58367507	162	0.3634	298	0.4161
Q9UJU6	DBNL	-0.286739	-0.0343479	0.190125	-1.38397	0.166371	0.262057	28988	7	44044640	44061716	54	0.3637	183	0.2141
P22102	GART	-0.415498	-0.0867837	0.22889	-1.99338	0.0462215	0.168111	2618	21	33503931	33542917	51	0.3647	102	0.3464
Q16698	DECR1	-0.289281	-0.208401	0.131601	-1.4017	0.161008	0.259034	1666	8	90001352	90052004	113	0.365	209	0.4458
P25686	DNAJB2	-0.281327	-0.219653	0.132197	-1.36958	0.170821	0.265819	3300	2	219279318	219286900	16	0.3651	99	0.5298
Q15173	PPP2R5B	-0.363755	-0.136568	0.196599	-1.72453	0.0846146	0.199652	5526	11	64917553	64934478	36	0.3662	111	0.3616
Q9UI15	TAGLN3	-0.338335	-0.242284	0.20945	-1.62037	0.105156	0.214066	29114	3	111998739	112013888	84	0.3666	310	0.1966
Q14643	ITPR1	-0.438546	-0.181765	0.211475	-2.08849	0.0367552	0.168111	3708	3	4493348	4847840	1148	0.3681	1303	0.4121
P08133	ANXA6	-0.449364	-0.254419	0.209988	-2.16164	0.0306471	0.168111	309	5	151100706	151157882	215	0.3683	437	0.5448
Q9UPA5	BSN	-0.492753	-0.296055	0.231208	-2.39635	0.0165603	0.168111	8927	3	49554489	49671549	169	0.3695	229	0.3347
P53365	ARFIP2	-0.253799	-0.072811	0.182262	-1.21084	0.225959	0.311647	23647	11	6474683	6481479	6	0.3697	128	0.5668
Q9NSD9	FARSB	-0.417726	-0.245391	0.259185	-1.99189	0.0463844	0.168111	10056	2	222571443	222656355	185	0.37	336	0.323
Q99497	PARK7	-0.320676	-0.212829	0.144123	-1.54998	0.121149	0.225614	11315	1	7961654	7985283	47	0.371	128	0.526
P61313	RPL15	-0.268367	-0.249914	0.103388	-1.33225	0.182779	0.275534	6138	3	23916804	23923696	12	0.371	110	0.455
Q9P2P5	HECW2	-0.389508	-0.223575	0.174462	-1.87175	0.0612425	0.184723	57520	2	196199000	196593692	1124	0.3713	1265	0.3279
Q9UI40	SLC24A2	-0.300314	-0.207608	0.126676	-1.45717	0.145071	0.248389	25769	9	19507452	19789695	775	0.3713	886	0.4107
P50914	RPL14	-0.19847	-0.211065	0.0659597	-0.982193	0.326006	0.394354	9045	3	40457292	40462372	15	0.3715	132	0.6642
P27635	RPL10	-0.391223	-0.286458	0.179617	-1.92602	0.0541034	0.178708	6134	23	154398065	154402339	10	0.3716	55	0.433
Q9Y3S1	WNK2	-0.513707	-0.243214	0.262542	-2.44937	0.0143117	0.168111	65268	9	93184155	93320572	385	0.3722	507	0.406
P84077	ARF1	-0.157109	-0.0663787	0.0916023	-0.745752	0.455818	0.504926	375	1	228082660	228099212	24	0.3723	75	0.493
Q9Y281	CFL2	-0.244046	-0.0377082	0.113558	-1.16031	0.245924	0.326813	1073	14	34710382	34714823	10	0.3727	241	0.6044
Q8WVD5	RNF141	-0.379397	-0.199799	0.172334	-1.81162	0.0700461	0.18901	50862	11	10511678	10541227	104	0.3729	243	0.3625
Q96PY5	FMNL2	-0.454809	-0.232097	0.164485	-2.2013	0.0277163	0.168111	114793	2	152335170	152649834	953	0.3749	1072	0.3968
Q6UW68	TMEM205	-0.043739	0.00695491	0.0588163	-0.207985	0.835241	0.84439	374882	19	11342776	11346414	2	0.3765	73	0.4494
Q9UHQ9	CYB5R1	-0.4165	-0.275909	0.194331	-2.03329	0.0420252	0.168111	51706	1	202961873	202967276	10	0.3768	111	0.2711
Q07960	ARHGAP1	-0.219885	-0.0753006	0.0938918	-1.04506	0.295995	0.366906	392	11	46677075	46700665	31	0.3771	114	0.05979
P08865	RPSA	-0.159145	-0.166204	0.0607661	-0.775865	0.43783	0.489393	3921	3	39406689	39412542	31	0.3774	221	0.3013
Q96PB7	OLFM3	-0.313647	-0.316792	0.149645	-1.57541	0.115164	0.222615	118427	1	101802567	101997234	636	0.3776	755	0.3854
Q9NXC2	GFOD1	-0.326217	-0.16427	0.183642	-1.55422	0.120135	0.225547	54438	6	13357830	13487637	325	0.3778	459	0.3323
P49821	NDUFV1	-0.276161	-0.181726	0.204646	-1.3158	0.188244	0.278906	4723	11	67606852	67612541	4	0.3783	150	0.7405
P28472	GABRB3	-0.200711	-0.186257	0.148426	-0.959343	0.337388	0.403858	2562	15	26543546	26773788	626	0.379	870	0.5401
Q9Y2Q0	ATP8A1	-0.234396	-0.0430088	0.198098	-1.13057	0.25824	0.335942	10396	4	42408373	42657105	735	0.3805	983	0.4239
Q9Y3E7	CHMP3	-0.0754941	-0.0689881	0.0573538	-0.359808	0.718991	0.734094	51652	2	86503430	86563497	159	0.3812	272	0.3634
P46379	BAG6	-0.476296	-0.308507	0.244058	-2.31849	0.0204238	0.168111	7917	6	31639028	31660767	68	0.3817	207	0.4444
O43854	EDIL3	-0.385998	-0.135101	0.13018	-1.84032	0.0657237	0.186184	10085	5	83940595	84384867	878	0.3819	961	0.3962
P18505	GABRB1	-0.117042	-0.1613	0.0818709	-0.565232	0.571917	0.607433	2560	4	46993858	47427343	1058	0.3828	1180	0.2939
Q00839	HNRNPU	-0.416412	-0.253913	0.192595	-2.01494	0.043913	0.168111	3192	1	244850300	244864525	19	0.3831	108	0.5735
Q5VWJ9	SNX30	-0.441277	-0.282923	0.219213	-2.14265	0.0321429	0.168111	401548	9	112749725	112875851	385	0.384	467	0.4006
O43676	NDUFB3	-0.13026	-0.132908	0.102332	-0.621403	0.534335	0.575217	4709	2	201071739	201085750	32	0.3842	128	0.3916
Q8N9F7	GDPD1	-0.278053	-0.11212	0.179997	-1.31871	0.187267	0.278643	284161	17	59220467	59275970	99	0.3848	188	0.3081
P49411	TUFM	-0.456864	-0.278901	0.2328	-2.20376	0.0275425	0.168111	7284	16	28842411	28846511	7	0.3848	76	0.4277
Q96NN9	AIFM3	-0.153724	-0.0441711	0.120596	-0.730793	0.464907	0.512681	150209	22	20965130	20981360	53	0.3864	153	0.1844
P47756	CAPZB	-0.438672	-0.216292	0.220253	-2.09185	0.0364536	0.168111	832	1	19338773	19485641	517	0.3867	678	0.3783
Q15286	RAB35	-0.303364	-0.196148	0.141563	-1.45707	0.1451	0.248389	11021	12	120095094	120116839	64	0.387	118	0.08421
P05204	HMGN2	-0.214685	-0.194267	0.0224905	-1.0692	0.28498	0.35763	3151	1	26472411	26476642	7	0.3877	81	0.5424
P07355	ANXA2	-0.274745	-0.17171	0.046726	-1.34818	0.177602	0.272066	302	15	60347151	60397986	123	0.389	211	0.5421
P60484	PTEN	-0.443876	-0.312399	0.189266	-2.199	0.0278793	0.168111	5728	10	87863438	87971930	132	0.3895	207	0.358
Q02978	SLC25A11	-0.184522	-0.170098	0.0617082	-0.900751	0.367722	0.430216	8402	17	4937130	4940167	3	0.3896	98	0.5531
Q9P032	NDUFAF4	-0.207809	-0.0747107	0.162046	-0.988237	0.323038	0.392243	29078	6	96889311	96897891	29	0.3897	166	0.2203
Q9UQB8	BAIAP2	-0.463707	-0.301512	0.221746	-2.26706	0.0233877	0.168111	10458	17	81035144	81117432	332	0.3909	512	0.3676
P50213	IDH3A	-0.124455	0.0542819	0.133818	-0.609178	0.542407	0.581177	3419	15	78149362	78170542	56	0.391	174	0.4859
O94772	LY6H	-0.277161	-0.211565	0.120104	-1.35016	0.176968	0.272066	4062	8	143157914	143160636	7	0.3921	137	0.1643
P10644	PRKAR1A	-0.372262	-0.144794	0.158067	-1.7737	0.0761152	0.193599	5573	17	68413623	68551316	352	0.3947	511	0.4411
P23284	PPIB	-0.326761	-0.158973	0.174047	-1.55705	0.11946	0.225547	5479	15	64155815	64163155	16	0.3956	106	0.1313
P22392	NME2	-0.26534	-0.12884	0.118299	-1.26516	0.205816	0.294512	4831	17	51165435	51171744	17	0.3962	172	0.8047
O94760	DDAH1	-0.177384	-0.0206026	0.118408	-0.846529	0.397259	0.454124	23576	1	85318485	85578363	764	0.3988	894	0.373
P48556	PSMD8	-0.382423	-0.15018	0.222119	-1.81318	0.0698064	0.18901	5714	19	38374550	38383824	27	0.3991	160	0.5388
Q9C0D0	PHACTR1	-0.5176	-0.375511	0.234904	-2.59011	0.00959554	0.168111	221692	6	12716606	13290244	1357	0.4006	1482	0.3784
P78559	MAP1A	-0.485253	-0.24539	0.198866	-2.33413	0.0195903	0.168111	4130	15	43517608	43531620	19	0.4007	77	0.1459
Q00610	CLTC	-0.213883	-0.0140577	0.130833	-1.02471	0.305503	0.376076	1213	17	59619689	59696956	118	0.4008	166	0.4254
Q16851	UGP2	-0.230621	-0.249933	0.0569664	-1.16168	0.245369	0.326514	7360	2	63840950	63891562	121	0.4012	211	0.2996
Q9UQN3	CHMP2B	-0.354811	-0.253387	0.145071	-1.74324	0.0812935	0.197568	25978	3	87227263	87255548	64	0.4014	187	0.06301
P30153	PPP2R1A	-0.344646	-0.0542198	0.175147	-1.6492	0.0991085	0.209723	5518	19	52189802	52226425	134	0.4014	316	0.6193
Q86Y39	NDUFA11	-0.197023	-0.140268	0.137302	-0.939324	0.347566	0.413266	126328	19	5891276	5904013	44	0.4019	170	0.4645
Q9UBB6	NCDN	-0.17939	0.0386513	0.142886	-0.875626	0.381235	0.441517	23154	1	35557792	35566779	10	0.4022	61	0.4616
Q5T4S7	UBR4	-0.441044	-0.182342	0.208982	-2.10096	0.0356456	0.168111	23352	1	19074506	19210319	258	0.4027	383	0.4233
Q8WUY1	THEM6	-0.25781	-0.0774767	0.0894246	-1.22665	0.219958	0.306579	51337	8	142727203	142736932	23	0.4033	141	0.3624
Q86Y82	STX12	-0.124098	-0.0796987	0.0896575	-0.590676	0.554739	0.591844	23673	1	27773183	27824452	55	0.4039	112	0.2941
P29692	EEF1D	-0.205281	0.0168469	0.158068	-0.998809	0.317889	0.387727	1936	8	143579697	143597675	78	0.4043	225	0.5941
Q330K2	NDUFAF6	-0.343944	-0.149404	0.150875	-1.63968	0.101074	0.210276	137682	8	94895451	95058716	475	0.4043	600	0.2532
Q92974	ARHGEF2	-0.536585	-0.32507	0.223068	-2.64538	0.00816078	0.168111	9181	1	155946640	156002635	75	0.4046	147	0.418
Q9Y2G0	EFR3B	-0.422816	-0.221019	0.244893	-2.01543	0.0438614	0.168111	22979	2	25042104	25159135	256	0.4052	387	0.3706
O15484	CAPN5	-0.373922	-0.248187	0.182615	-1.81114	0.0701218	0.18901	726	11	77066945	77126155	159	0.4062	298	0.4502
P62826	RAN	-0.125903	0.0169456	0.0964152	-0.603743	0.546015	0.584652	5901	12	130871994	130877678	16	0.4062	281	0.4565
P07093	SERPINE2	-0.156963	-0.177993	0.0523654	-0.770741	0.440861	0.491754	5270	2	223975048	224039319	234	0.4063	362	0.3783
Q7KZI7	MARK2	-0.470748	-0.27991	0.223573	-2.2792	0.0226566	0.168111	2011	11	63838928	63911020	105	0.4067	179	0.5661
Q9NP79	VTA1	-0.227896	0.0726201	0.166847	-1.1323	0.257509	0.335263	51534	6	142147162	142220948	147	0.4067	237	0.3844
O75489	NDUFS3	-0.10393	-0.129903	0.0948404	-0.495886	0.619976	0.646322	4722	11	47579010	47584563	6	0.4071	71	0.08692
Q9BXF6	RAB11FIP5	-0.348993	-0.150014	0.237288	-1.65638	0.0976463	0.208267	26056	2	73073382	73113018	70	0.4074	206	0.4034
Q15121	PEA15	-0.165329	0.0931578	0.128318	-0.818634	0.412996	0.467829	8682	1	160205319	160215376	9	0.4084	132	0.6647
P35908	KRT2	-0.403383	-0.260854	0.181068	-1.96562	0.0493444	0.173038	3849	12	52644558	52652175	14	0.4088	195	0.08038
Q8TAC9	SCAMP5	-0.0798403	-0.114918	0.0449724	-0.382839	0.701839	0.719329	192683	15	74995535	75021495	72	0.4088	173	0.3503
Q9Y6I3	EPN1	-0.159688	0.0679582	0.126057	-0.783593	0.43328	0.485036	29924	19	55675195	55695767	64	0.4093	186	0.3824
P10114	RAP2A	-0.225645	-0.225898	0.108976	-1.10914	0.267371	0.342543	5911	13	97434221	97467998	41	0.4095	119	0.5248
Q9NVI7	ATAD3A	-0.221245	-0.181787	0.116748	-1.06501	0.286871	0.359205	55210	1	1512143	1534687	75	0.41	176	0.4161
O43181	NDUFS4	-0.111351	-0.131533	0.101787	-0.531165	0.595305	0.625734	4724	5	53560623	53683341	352	0.4103	505	0.4162
P07099	EPHX1	-0.288978	-0.255965	0.0655908	-1.45513	0.145634	0.248546	2052	1	225810074	225845563	124	0.4106	304	0.485
Q9P0M9	MRPL27	-0.249418	-0.204772	0.0774713	-1.22777	0.219537	0.306579	51264	17	50367867	50373201	16	0.4108	157	0.5736
Q9HA65	TBC1D17	-0.60469	-0.323787	0.286704	-2.91934	0.00350822	0.168111	79735	19	49877425	49888750	16	0.4111	108	0.2398
Q76NI1	KNDC1	-0.288556	-0.209999	0.161228	-1.38491	0.166082	0.26196	85442	10	133160467	133226412	300	0.4123	540	0.3605
Q96AQ6	PBXIP1	-0.189714	-0.00561994	0.169671	-0.919171	0.358007	0.422238	57326	1	154944080	154956091	11	0.4128	72	0.5479
Q13875	MOBP	-0.318087	-0.0939132	0.0988049	-1.51514	0.12974	0.232729	4336	3	39467573	39529497	277	0.4139	422	0.3283
Q9UI09	NDUFA12	-0.104869	-0.125957	0.0741292	-0.501121	0.616287	0.643989	55967	12	94971328	95003713	165	0.4142	309	0.2679
O14979	HNRNPDL	-0.119803	0.07323	0.19452	-0.599857	0.548602	0.586296	9987	4	82422564	82430225	25	0.4145	131	0.5238
P62979	RPS27A	-0.25577	-0.13757	0.0962653	-1.2211	0.222052	0.308373	6233	2	55231903	55235853	12	0.4153	119	0.541
Q8IWQ3	BRSK2	-0.458285	-0.26695	0.23144	-2.20044	0.0277773	0.168111	9024	11	1389899	1462689	356	0.4154	605	0.5699
O15083	ERC2	-0.324105	-0.263117	0.16717	-1.58767	0.112364	0.221076	26059	3	55508308	56468366	2853	0.4161	2976	0.339
Q9NX07	TRNAU1AP	-0.249051	-0.113429	0.144752	-1.18317	0.236744	0.320431	54952	1	28553017	28578545	44	0.4161	120	0.3698
Q14165	MLEC	-0.115399	0.095377	0.11175	-0.569306	0.569149	0.60498	9761	12	120687124	120701864	47	0.4163	186	0.4251
Q5T0F9	CC2D1B	-0.515353	-0.18232	0.238914	-2.44562	0.0144615	0.168111	200014	1	52350593	52366205	16	0.4166	61	0.447
Q9UGC6	RGS17	-0.253885	-0.14526	0.135023	-1.2106	0.226049	0.311647	26575	6	153010823	153131254	386	0.4171	510	0.3275
O14950	MYL12B	-0.316523	-0.212105	0.128072	-1.5381	0.124025	0.228208	103910	18	3262113	3278284	81	0.4175	233	0.5353
Q9H4G4	GLIPR2	-0.464867	-0.229199	0.176074	-2.2379	0.0252291	0.168111	152007	9	36136536	36163913	82	0.4177	216	0.1003
Q8NBX0	SCCPDH	-0.342484	-0.230125	0.15449	-1.66205	0.0965044	0.206943	51097	1	246724076	246768137	123	0.4177	339	0.3224
P55011	SLC12A2	-0.35506	-0.162744	0.144514	-1.69346	0.0903707	0.202734	6558	5	128083791	128189688	159	0.4178	207	0.4123
P55060	CSE1L	-0.306438	-0.0853245	0.15317	-1.45407	0.145928	0.248546	1434	20	49046246	49096960	121	0.4182	249	0.4345
Q9BRQ6	CHCHD6	-0.164173	-0.218081	0.0886978	-0.80939	0.418292	0.472494	84303	3	126704220	126960420	593	0.4184	741	0.439
P21397	MAOA	0.062057	0.041799	-0.000939192	0.294599	0.768301	0.780959	4128	23	43654907	43746824	96	0.4203	140	0.4699
P61978	HNRNPK	-0.27769	-0.0740831	0.143766	-1.31816	0.187453	0.278661	3190	9	83968083	83980654	18	0.4205	80	0.2774
P46977	STT3A	-0.17165	-0.106904	0.166438	-0.813787	0.415768	0.469973	3703	11	125592795	125622759	124	0.4212	229	0.5062
P78352	DLG4	-0.453008	-0.291553	0.208558	-2.21522	0.0267462	0.168111	1742	17	7189890	7220050	45	0.4215	118	0.4396
Q9Y3A3	MOB4	-0.314706	-0.111922	0.173126	-1.49204	0.135691	0.240762	25843	2	197515571	197553699	45	0.4224	92	0.4537
Q13885	TUBB2A	-0.337219	-0.185655	0.151757	-1.61063	0.107261	0.214636	7280	6	3153666	3157549	5	0.4225	111	0.3991
Q13155	AIMP2	-0.266521	-0.0315322	0.17539	-1.28304	0.199479	0.288641	7965	7	6009251	6023834	74	0.4233	250	0.2836
Q5TBA9	FRY	-0.545024	-0.288796	0.281375	-2.60309	0.00923956	0.168111	10129	13	32031300	32297498	758	0.4237	892	0.5389
Q9BW30	TPPP3	-0.477277	-0.24318	0.165978	-2.32016	0.0203334	0.168111	51673	16	67389807	67393535	9	0.4239	85	0.3766
P20674	COX5A	-0.259476	-0.17041	0.151881	-1.23767	0.215841	0.302894	9377	15	74920275	74938154	34	0.4241	117	0.2927
P05067	APP	-0.0994967	0.307128	0.311806	-0.563681	0.572972	0.607433	351	21	25880550	26171128	732	0.426	894	0.5399
Q8N9F0	NAT8L	-0.461207	-0.268662	0.215519	-2.22819	0.025869	0.168111	339983	4	2059512	2069089	11	0.4266	68	0.7852
O75044	SRGAP2	-0.429068	-0.166793	0.199043	-2.04224	0.0411292	0.168111	23380	1	206203464	206464443	212	0.4288	256	0.3908
Q14974	KPNB1	-0.338768	-0.0320371	0.187727	-1.63528	0.101992	0.210546	3837	17	47649838	47683638	47	0.4289	137	0.4249
O14827	RASGRF2	-0.429968	-0.257925	0.209926	-2.0715	0.0383134	0.168111	5924	5	80960672	81230162	795	0.4289	958	0.3038
O00305	CACNB4	-0.437072	-0.237683	0.231905	-2.08525	0.0370486	0.168111	785	2	151832771	152099988	618	0.4304	698	0.4852
P43487	RANBP1	-0.358537	-0.0861913	0.181985	-1.70614	0.0879835	0.202373	5902	22	20115938	20127357	30	0.431	187	0.5042
Q9BV35	SLC25A23	-0.385036	-0.286923	0.174364	-1.89866	0.0576106	0.180793	79085	19	6436081	6460221	70	0.4311	195	0.32
P35579	MYH9	-0.496604	-0.280007	0.230535	-2.39854	0.0164616	0.168111	4627	22	36281277	36388067	307	0.4314	506	0.572
Q8IZP0	ABI1	-0.16039	-0.0899292	0.135252	-0.760422	0.447004	0.496877	10006	10	26746596	26861087	362	0.4318	472	0.5147
Q9Y2J8	PADI2	-0.475212	-0.195366	0.166354	-2.26922	0.0232563	0.168111	11240	1	17066761	17119453	245	0.4318	404	0.5215
P34897	SHMT2	-0.365324	-0.155258	0.200992	-1.73463	0.0828086	0.198605	6472	12	57229573	57234935	5	0.4345	59	0.5276
Q9H7Z7	PTGES2	0.103182	0.00252641	0.0064576	0.489682	0.624359	0.649885	80142	9	128120693	128128462	4	0.4349	63	0.1786
P49674	CSNK1E	-0.343596	-0.204186	0.179082	-1.64051	0.100902	0.210276	1454	22	38290691	38318084	33	0.436	117	0.6088
O14974	PPP1R12A	-0.462962	-0.262644	0.171637	-2.26434	0.0235543	0.168111	4659	12	79773563	79935455	228	0.4361	291	0.4517
Q96GC9	VMP1	-0.348335	-0.207242	0.211976	-1.66099	0.0967168	0.207121	81671	17	59707502	59840593	207	0.4362	264	0.4437
O75521	ECI2	-0.425111	-0.273414	0.200068	-2.06929	0.0385202	0.168111	10455	6	4115693	4135597	60	0.437	205	0.553
Q16795	NDUFA9	-0.122355	-0.141988	0.104622	-0.584012	0.559213	0.595928	4704	12	4649098	4687554	112	0.4373	292	0.4179
Q8TBX8	PIP4K2C	-0.430978	-0.217839	0.216764	-2.0554	0.0398416	0.168111	79837	12	57591159	57603428	19	0.4378	88	0.5443
Q14697	GANAB	-0.122848	0.135812	0.129432	-0.617392	0.536977	0.57716	23193	11	62624826	62646726	22	0.4395	73	0.3193
Q8N9R8	SCAI	-0.319874	-0.0735128	0.202586	-1.53162	0.125617	0.228706	286205	9	124942608	125143559	308	0.4395	391	0.4448
P55010	EIF5	-0.2125	0.0172351	0.0995235	-1.01974	0.307852	0.378386	1983	14	103334002	103345025	25	0.4401	199	0.7782
Q16798	ME3	-0.375278	-0.304652	0.206238	-1.8455	0.0649664	0.186169	10873	11	86441108	86672636	1009	0.4406	1223	0.409
Q7L5D6	GET4	-0.245952	-0.175896	0.117562	-1.18077	0.237697	0.320661	51608	7	876554	896434	76	0.441	293	0.5953
Q92752	TNR	-0.217126	-0.204569	0.108463	-1.0587	0.28974	0.361387	7143	1	175322799	175743702	1218	0.4414	1348	0.2531
Q12983	BNIP3	-0.275497	-0.23057	0.0900804	-1.36352	0.172719	0.267792	664	10	131967683	131982013	24	0.4428	195	0.5942
P09972	ALDOC	-0.360212	-0.12772	0.173275	-1.70894	0.0874643	0.202151	230	17	28573115	28576948	2	0.4432	33	0.06397
P61353	RPL27	-0.24483	-0.202252	0.097192	-1.19695	0.231326	0.316324	6155	17	42998429	43002959	8	0.445	73	0.3279
P06730	EIF4E	-0.29767	-0.116937	0.177401	-1.41112	0.15821	0.256931	1977	4	98878456	98930635	150	0.447	275	0.3701
Q9NQ48	LZTFL1	-0.211981	0.0385998	0.117934	-1.02802	0.303943	0.375018	54585	3	45823316	45915724	177	0.447	286	0.4746
P05090	APOD	-0.46414	-0.214653	0.183252	-2.21879	0.0265022	0.168111	347	3	195568702	195584205	59	0.4472	267	0.7415
Q8NFX7	STXBP6	-0.46917	-0.244595	0.225489	-2.24097	0.0250296	0.168111	29091	14	24809654	25050297	723	0.4484	867	0.5361
Q99961	SH3GL1	-0.156038	0.0271176	0.136132	-0.757452	0.448781	0.497975	6455	19	4360367	4400568	83	0.4486	202	0.6133
Q14166	TTLL12	-0.435415	-0.215939	0.215771	-2.0765	0.0378491	0.168111	23170	22	43166622	43187131	103	0.4489	343	0.3076
P22626	HNRNPA2B1	-0.241124	-0.0898167	0.112909	-1.14587	0.251851	0.331393	3181	7	26189927	26200793	21	0.4499	118	0.5567
Q8N766	EMC1	-0.273723	-0.19312	0.119247	-1.3231	0.185805	0.277239	23065	1	19215664	19251559	103	0.4507	339	0.417
Q07157	TJP1	-0.475057	-0.256167	0.173748	-2.31597	0.0205612	0.168111	7082	15	29699367	29968799	619	0.4514	780	0.4099
Q14168	MPP2	-0.365298	-0.232849	0.177163	-1.76073	0.0782853	0.195217	4355	17	43875357	43909711	92	0.452	249	0.5984
Q12933	TRAF2	-0.478553	-0.250306	0.17923	-2.32286	0.0201878	0.168111	7186	9	136881933	136926621	113	0.4522	198	0.465
Q93050	ATP6V0A1	-0.306264	-0.223446	0.217027	-1.46094	0.144033	0.248374	535	17	42458844	42522579	65	0.453	186	0.5569
O75165	DNAJC13	-0.175452	0.0960018	0.0543983	-0.852725	0.393813	0.451885	23317	3	132417532	132539032	232	0.4533	376	0.4534
Q9ULC3	RAB23	-0.329711	-0.199348	0.162823	-1.57651	0.114911	0.222615	51715	6	57186992	57222314	36	0.4543	139	0.6768
P42262	GRIA2	-0.446677	-0.328438	0.208698	-2.21331	0.026878	0.168111	2891	4	157220584	157366075	215	0.4549	306	0.3951
P05198	EIF2S1	-0.224403	-0.123058	0.14198	-1.06829	0.28539	0.35763	1965	14	67360317	67386516	79	0.4555	259	0.5387
Q92747	ARPC1A	-0.392023	-0.158416	0.20565	-1.86121	0.0627158	0.184766	10552	7	99325873	99366262	71	0.4572	184	0.5683
O43813	LANCL1	-0.454975	-0.196083	0.215155	-2.16861	0.0301135	0.168111	10314	2	210431249	210477618	106	0.4576	228	0.5656
O43615	TIMM44	-0.280456	-0.0134698	0.174934	-1.35726	0.174699	0.269959	10469	19	7926718	7943823	64	0.458	156	0.1698
P54619	PRKAG1	-0.500648	-0.28465	0.22127	-2.43102	0.0150573	0.168111	5571	12	49002272	49018980	13	0.4584	53	0.4566
P62906	RPL10A	-0.262581	-0.214976	0.125146	-1.27881	0.200966	0.290143	4736	6	35468401	35470781	12	0.4585	174	0.6644
Q8TEA8	DTD1	-0.3148	-0.177992	0.163295	-1.50145	0.133242	0.237996	92675	20	18587912	18763917	685	0.4595	870	0.4577
P26641	EEF1G	-0.242521	-0.0107588	0.196604	-1.1812	0.237526	0.320661	1937	11	62559601	62573988	22	0.4598	67	0.4499
P60709	ACTB	-0.348569	-0.145336	0.19025	-1.65467	0.0979938	0.208267	60	7	5527148	5530601	9	0.4599	173	0.1618
Q8WUH2	TGFBRAP1	-0.510883	-0.291389	0.234527	-2.47656	0.0132665	0.168111	9392	2	105249404	105329714	231	0.4599	362	0.5406
P43686	PSMC4	-0.37347	-0.12922	0.214637	-1.77311	0.0762118	0.193599	5704	19	39971005	39981764	28	0.4601	144	0.6723
Q6KCM7	SLC25A25	-0.15222	-0.0771047	0.0155068	-0.727033	0.467207	0.514344	114789	9	128068200	128109258	115	0.4607	166	0.3645
Q15436	SEC23A	-0.354984	-0.150844	0.198121	-1.68489	0.0920115	0.203685	10484	14	39031919	39103243	167	0.4652	311	0.5997
O75955	FLOT1	-0.163047	-0.155512	0.0890215	-0.783513	0.433327	0.485036	10211	6	30727734	30742685	97	0.4653	354	0.3296
O14964	HGS	-0.203913	0.0654748	0.126074	-0.999783	0.317417	0.387471	9146	17	81683932	81702121	74	0.4667	290	0.7723
Q86YQ8	CPNE8	-0.288498	-0.233968	0.169921	-1.39481	0.163075	0.260245	144402	12	38652200	38906135	732	0.4668	856	0.5099
P38117	ETFB	-0.488493	-0.184535	0.24552	-2.31736	0.0204855	0.168111	2109	19	51345155	51366418	103	0.467	244	0.5389
Q96MZ0	GDAP1L1	-0.349627	-0.119065	0.226423	-1.66443	0.0960282	0.206817	78997	20	44247099	44280917	73	0.4671	211	0.4383
O14578	CIT	-0.431529	-0.262481	0.205261	-2.08667	0.0369197	0.168111	11113	12	119685790	119877318	453	0.4673	566	0.5499
Q9BVC4	MLST8	-0.408565	-0.210734	0.191713	-1.94998	0.05118	0.175515	64223	16	2205177	2209417	9	0.4685	89	0.754
Q96GD0	PDXP	-0.127138	0.0336554	0.106167	-0.613848	0.539317	0.578638	57026	22	37658730	37666932	20	0.4685	150	0.5487
P07197	NEFM	-0.432343	-0.233418	0.160946	-2.09642	0.0360461	0.168111	4741	8	24913761	24919093	4	0.4688	92	0.4416
Q6UWE0	LRSAM1	-0.463126	-0.257398	0.200976	-2.23779	0.0252364	0.168111	90678	9	127451486	127503501	132	0.4696	236	0.4569
Q9NUB1	ACSS1	-0.332242	-0.0257904	0.165014	-1.5983	0.109978	0.218373	84532	20	25006230	25058182	129	0.4699	247	0.3605
Q8TF44	C2CD4C	-0.245186	-0.282857	0.119217	-1.22668	0.219944	0.306579	126567	19	405435	409170	15	0.4708	193	0.2889
P49748	ACADVL	-0.211659	-0.121611	0.137057	-1.00789	0.313509	0.383576	37	17	7217125	7225267	11	0.4711	84	0.334
P51798	CLCN7	-0.371763	-0.176648	0.225029	-1.7659	0.0774138	0.194362	1186	16	1444933	1475084	184	0.4715	437	0.4395
Q9NQ79	CRTAC1	-0.354069	-0.191747	0.146209	-1.69563	0.0899581	0.202552	55118	10	97854711	98030828	316	0.4715	384	0.3347
P29992	GNA11	-0.339161	-0.112711	0.192567	-1.61	0.107399	0.214636	2767	19	3094410	3124002	128	0.4719	283	0.2477
Q9NZQ3	NCKIPSD	-0.436662	-0.269943	0.226416	-2.10272	0.0354923	0.168111	51517	3	48673839	48685933	23	0.472	96	0.2809
Q5D862	FLG2	-0.335811	-0.264708	0.166614	-1.64627	0.0997094	0.210176	388698	1	152348735	152360010	17	0.4723	94	0.332
Q12931	TRAP1	-0.188179	0.0755984	0.153996	-0.932684	0.350985	0.416405	10131	16	3658037	3717597	155	0.4726	211	0.4523
Q6H8Q1	ABLIM2	-0.427504	-0.226457	0.213302	-2.04006	0.0413456	0.168111	84448	4	7965310	8158832	788	0.4736	890	0.5383
P21589	NT5E	-0.32318	-0.236054	0.114003	-1.59212	0.11136	0.219706	4907	6	85449584	85495791	64	0.4736	201	0.3872
P49368	CCT3	-0.441142	-0.200169	0.205889	-2.10345	0.0354276	0.168111	7203	1	156308961	156338415	73	0.4737	143	0.5806
O43427	FIBP	-0.402799	-0.207774	0.201572	-1.92112	0.054718	0.180147	9158	11	65883740	65888539	9	0.4737	100	0.1478
Q9Y426	C2CD2	-0.312503	-0.196776	0.186033	-1.49052	0.136088	0.240933	25966	21	41885110	41953957	281	0.474	468	0.3682
Q99426	TBCB	-0.22806	0.0420144	0.14069	-1.11378	0.265374	0.3408	1155	19	36114986	36125948	24	0.4748	158	0.3723
P21796	VDAC1	-0.304691	-0.21937	0.181513	-1.45892	0.14459	0.248389	7416	5	133971875	134005389	78	0.4752	178	0.4252
P30405	PPIF	-0.343829	-0.0878573	0.216901	-1.64514	0.0999431	0.210176	10105	10	79347464	79355334	20	0.4763	168	0.3979
O00231	PSMD11	-0.340197	-0.113897	0.19467	-1.61502	0.106308	0.214636	5717	17	32444463	32483319	37	0.4764	79	0.3855
Q09666	AHNAK	-0.551396	-0.306603	0.169003	-2.74169	0.00611306	0.168111	79026	11	62433542	62546860	245	0.477	334	0.5176
P46779	RPL28	-0.394551	-0.297426	0.166265	-1.95692	0.0503592	0.174086	6158	19	55385101	55403245	101	0.4771	244	0.6475
P05771	PRKCB	-0.491431	-0.298057	0.24132	-2.38358	0.0171462	0.168111	5579	16	23835979	24220611	1137	0.4775	1292	0.3807
Q99250	SCN2A	-0.446333	-0.198537	0.233758	-2.12535	0.0335587	0.168111	6326	2	165130149	165392310	702	0.4777	757	0.4736
O75061	DNAJC6	-0.350474	-0.075173	0.191216	-1.67386	0.0941604	0.204652	9829	1	65248148	65415869	454	0.4785	555	0.4977
Q14515	SPARCL1	-0.0380705	-0.048326	0.10413	-0.18061	0.856674	0.86476	8404	4	87473330	87529503	182	0.4795	327	0.3805
Q9UPN3	MACF1	-0.500941	-0.209348	0.247028	-2.38545	0.0170596	0.168111	23499	1	39081417	39487138	745	0.481	887	0.5861
Q9H115	NAPB	-0.241915	-0.0812642	0.140931	-1.1473	0.251259	0.331158	63908	20	23374519	23421519	166	0.4814	287	0.5214
O95298	NDUFC2	-0.206585	-0.16049	0.175599	-0.98442	0.324911	0.393487	4718	11	78068347	78080219	31	0.4825	222	0.4557
Q9NNW7	TXNRD2	-0.36215	-0.131584	0.197427	-1.71694	0.0859927	0.201068	10587	22	19875518	19941992	286	0.4831	483	0.4098
P22748	CA4	0.0342701	-0.176929	-0.0135692	0.171445	0.863874	0.871481	762	17	60149941	60159546	13	0.4832	81	0.3987
P61106	RAB14	-0.183503	-0.167317	0.101341	-0.882535	0.377489	0.438128	51552	9	121178137	121202087	56	0.4839	144	0.3759
Q02952	AKAP12	-0.486323	-0.219084	0.217381	-2.3194	0.0203745	0.168111	9590	6	151239999	151358559	475	0.4844	555	0.4374
Q00535	CDK5	-0.394878	-0.222971	0.196582	-1.88671	0.0592011	0.182613	1020	7	151053812	151057965	8	0.4854	105	0.586
P62249	RPS16	-0.266703	-0.218963	0.102392	-1.31015	0.190148	0.280071	6217	19	39433207	39436020	14	0.4861	155	0.7428
P10515	DLAT	-0.301842	-0.188879	0.203295	-1.43884	0.150198	0.250695	1737	11	112024814	112064278	69	0.4875	138	0.4994
Q96BM9	ARL8A	-0.262317	-0.110122	0.127047	-1.24864	0.211797	0.298526	127829	1	202133404	202144743	18	0.4878	167	0.5164
P07384	CAPN1	-0.488175	-0.282761	0.234818	-2.35715	0.0184173	0.168111	823	11	65181215	65212006	58	0.4881	150	0.4448
Q6GYQ0	RALGAPA1	-0.492767	-0.234004	0.243676	-2.34976	0.0187866	0.168111	253959	14	35538352	35809304	327	0.4888	381	0.5229
P35998	PSMC2	-0.354222	-0.118642	0.201193	-1.6817	0.0926292	0.203803	5701	7	103344405	103369395	37	0.4894	103	0.533
Q3ZCQ8	TIMM50	-0.273931	-0.0728068	0.138319	-1.29991	0.193632	0.282866	92609	19	39480412	39493018	28	0.4903	173	0.7059
Q01518	CAP1	-0.319396	-0.143936	0.124475	-1.52324	0.127702	0.230928	10487	1	40040240	40072649	109	0.4913	261	0.5631
P78527	PRKDC	-0.129268	-0.159517	0.164089	-0.616248	0.537732	0.577324	5591	8	47773108	47960183	132	0.4918	158	0.4541
P21912	SDHB	-0.309067	-0.25418	0.0707598	-1.55255	0.120533	0.225547	6390	1	17018722	17054170	115	0.4919	339	0.4589
O43678	NDUFA2	-0.197528	-0.131011	0.175625	-0.937259	0.348627	0.41422	4695	5	140645363	140647785	7	0.4921	86	0.5127
O15144	ARPC2	-0.17793	-0.064359	0.0671714	-0.847135	0.396921	0.454124	10109	2	218217094	218254348	72	0.4932	155	0.5216
P09382	LGALS1	-0.16522	0.00445536	0.0931702	-0.789357	0.429904	0.48266	3956	22	37675606	37679802	8	0.4936	150	0.5757
P39019	RPS19	-0.184885	-0.187734	0.0530223	-0.910903	0.362348	0.42548	6223	19	41859918	41871416	22	0.4937	80	0.7134
P17980	PSMC3	-0.393701	-0.171075	0.226252	-1.86804	0.0617583	0.184766	5702	11	47418769	47426473	18	0.4943	129	0.1449
Q5TH69	ARFGEF3	-0.506707	-0.240802	0.230114	-2.41826	0.015596	0.168111	57221	6	138161916	138344663	508	0.4949	663	0.5212
P62851	RPS25	-0.273322	-0.240232	0.0980117	-1.35431	0.17564	0.270891	6230	11	119015712	119018347	7	0.4963	105	0.3693
P62330	ARF6	-0.351325	-0.211213	0.177234	-1.68	0.092959	0.203803	382	14	49893018	49897054	3	0.4965	51	0.811
P07195	LDHB	-0.335826	-0.240039	0.065924	-1.67991	0.0929762	0.203803	3945	12	21635341	21657971	13	0.4969	125	0.502
Q01105	SET	-0.22992	-0.183117	0.0560765	-1.12989	0.258526	0.336041	6418	9	128683432	128696396	5	0.4972	55	0.4579
Q9Y305	ACOT9	-0.291153	-0.188011	0.202661	-1.38787	0.16518	0.261807	23597	23	23703660	23743290	134	0.4983	302	0.2935
Q9NT62	ATG3	-0.400396	-0.172529	0.172471	-1.90913	0.0562466	0.180147	64422	3	112532507	112561963	87	0.499	222	0.3967
Q9BR76	CORO1B	-0.282387	-0.0320402	0.154344	-1.35316	0.176005	0.271194	57175	11	67438047	67443821	5	0.499	102	0.9244
P07437	TUBB	-0.497368	-0.261229	0.224748	-2.38771	0.0169549	0.168111	203068	6	30720201	30725426	27	0.5001	306	0.4289
Q99733	NAP1L4	-0.190883	0.000207807	0.125456	-0.916889	0.359202	0.423025	4676	11	2944430	2992377	167	0.5006	315	0.5534
P09525	ANXA4	-0.309658	-0.171157	0.161483	-1.4767	0.139757	0.245802	307	2	69644100	69826464	365	0.5007	417	0.5042
Q07955	SRSF1	-0.326756	-0.122281	0.156857	-1.5521	0.12064	0.225547	6426	17	58000919	58007346	9	0.5009	87	0.3643
Q2M2I8	AAK1	-0.408837	-0.191481	0.211028	-1.94855	0.0513516	0.175596	22848	2	69457995	69643845	210	0.5012	267	0.5224
P17096	HMGA1	-0.150147	-0.191807	-0.0196719	-0.757214	0.448923	0.497975	3159	6	34236800	34246231	17	0.5041	191	0.6285
Q96F85	CNRIP1	-0.090584	0.088629	0.139555	-0.449198	0.653289	0.676922	25927	2	68284171	68320051	86	0.5042	234	0.4304
Q96CX2	KCTD12	-0.257049	-0.171578	0.155866	-1.22599	0.220206	0.306606	115207	13	76880169	76886405	17	0.505	135	0.9141
P11021	HSPA5	-0.118996	-0.0659937	0.0942581	-0.564618	0.572335	0.607433	3309	9	125234848	125241387	5	0.5053	83	0.7158
P42345	MTOR	-0.484052	-0.222877	0.251052	-2.30695	0.0210589	0.168111	2475	1	11106531	11262557	318	0.5062	399	0.5204
O00139	KIF2A	-0.43031	-0.163728	0.242508	-2.04057	0.0412948	0.168111	3796	5	62306162	62387184	193	0.5067	303	0.3714
Q9NX14	NDUFB11	-0.255196	-0.165229	0.172352	-1.21653	0.223785	0.310243	54539	23	47142216	47145210	1	0.5069	13	0.4718
Q9UPW8	UNC13A	-0.457524	-0.28107	0.217047	-2.22141	0.0263244	0.168111	23025	19	17601328	17688353	320	0.507	505	0.4006
P24752	ACAT1	-0.303467	-0.19021	0.182781	-1.44726	0.147826	0.248546	38	11	108121531	108148168	48	0.5071	131	0.5428
P28482	MAPK1	-0.273583	-0.113328	0.137467	-1.3011	0.193227	0.282531	5594	22	21759657	21867680	230	0.5072	341	0.5058
O75431	MTX2	-0.343569	-0.254062	0.187954	-1.66532	0.0958508	0.206817	10651	2	176269395	176338025	104	0.5072	195	0.5373
O43272	PRODH	-0.418811	-0.122983	0.196812	-1.98672	0.0469553	0.168871	5625	22	18912695	18936553	113	0.5075	274	0.7746
Q8IWT6	LRRC8A	-0.167665	-0.120924	0.0781916	-0.80028	0.42355	0.477089	56262	9	128882112	128918042	65	0.5087	148	0.7104
O15498	YKT6	-0.239597	-0.0580412	0.126524	-1.13767	0.255259	0.333675	10652	7	44200968	44214294	29	0.5088	171	0.7912
Q9BWS9	CHID1	-0.383194	-0.215939	0.238448	-1.82657	0.0677668	0.186476	66005	11	867859	915058	100	0.5091	241	0.7268
P49418	AMPH	-0.162157	-0.00913128	0.132403	-0.778124	0.436497	0.488244	273	7	38383694	38631567	1106	0.5094	1229	0.5339
Q7L099	RUFY3	-0.484578	-0.276753	0.221997	-2.34417	0.0190707	0.168111	22902	4	70704686	70808622	286	0.5097	353	0.4861
O95168	NDUFB4	-0.147787	-0.128476	0.153833	-0.70312	0.481982	0.528795	4710	3	120596281	120602411	24	0.5098	203	0.7778
Q8TB36	GDAP1	-0.325089	-0.145244	0.148514	-1.54966	0.121226	0.225614	54332	8	74349251	74367110	58	0.5099	178	0.4753
P47736	RAP1GAP	-0.421198	-0.185799	0.209531	-2.00686	0.0447662	0.168111	5909	1	21596215	21669375	259	0.5102	424	0.3003
P56556	NDUFA6	-0.0855326	-0.123033	0.0853131	-0.408125	0.683182	0.702902	4700	22	42085526	42090884	11	0.512	130	0.6629
P19404	NDUFV2	-0.223024	-0.16502	0.169524	-1.06325	0.287671	0.359683	4729	18	9102630	9134345	51	0.5122	146	0.5763
P62750	RPL23A	-0.110321	-0.14958	0.00489715	-0.543568	0.586739	0.619572	6147	17	28719982	28724356	3	0.5131	49	0.06029
Q9UBP0	SPAST	-0.339644	-0.164023	0.180925	-1.61839	0.10558	0.214367	6683	2	32063552	32157637	257	0.5145	380	0.505
Q8N9N7	LRRC57	-0.429859	-0.261258	0.208312	-2.07521	0.0379687	0.168111	255252	15	42528444	42548804	24	0.515	96	0.3059
P68400	CSNK2A1	-0.238891	-0.0577783	0.111042	-1.13294	0.257243	0.335189	1457	20	472969	543838	111	0.5159	255	0.6506
O00764	PDXK	-0.235158	-0.0113541	0.154149	-1.13312	0.257165	0.335189	8566	21	43719097	43762307	126	0.5159	274	0.5418
P23677	ITPKA	-0.543775	-0.309977	0.26284	-2.63135	0.00850557	0.168111	3706	15	41493858	41503559	18	0.516	99	0.2074
O00154	ACOT7	-0.164127	-0.00591642	0.127855	-0.787492	0.430995	0.483438	11332	1	6264272	6393766	471	0.5166	635	0.5547
Q96KP4	CNDP2	-0.116906	0.072795	0.0522165	-0.563804	0.572888	0.607433	55748	18	74496265	74523454	89	0.5192	215	0.5201
P62745	RHOB	-0.353435	-0.240858	0.140222	-1.73083	0.0834847	0.19927	388	2	20447071	20449445	5	0.5208	161	0.8078
Q8N5N7	MRPL50	-0.237859	-0.215758	0.129908	-1.15696	0.247291	0.327814	54534	9	101387633	101398641	23	0.5218	152	0.8626
P82909	MRPS36	-0.147381	-0.179487	0.0911245	-0.71518	0.474499	0.521656	92259	5	69217746	69230158	33	0.522	136	0.5061
O43815	STRN	-0.459769	-0.208963	0.207658	-2.19262	0.0283363	0.168111	6801	2	36837698	36966557	335	0.5225	467	0.6387
O95299	NDUFA10	-0.289541	-0.169224	0.19516	-1.37895	0.167912	0.262762	4705	2	239957372	240025402	191	0.5233	391	0.5526
Q68DU8	KCTD16	-0.467654	-0.233429	0.259238	-2.22924	0.0257993	0.168111	57528	5	144170760	144485686	591	0.5239	714	0.5498
O00408	PDE2A	-0.378817	-0.0903718	0.214597	-1.81066	0.0701949	0.18901	5138	11	72576140	72674453	267	0.524	406	0.5746
Q96PU5	NEDD4L	-0.543713	-0.342576	0.257851	-2.67071	0.00756983	0.168111	23327	18	58044233	58401541	1051	0.5246	1188	0.5362
P00338	LDHA	-0.431448	-0.284878	0.20891	-2.10397	0.0353822	0.168111	3939	11	18394389	18408218	43	0.525	187	0.6163
P10809	HSPD1	-0.247831	-0.19233	0.112627	-1.20034	0.230008	0.314789	3329	2	197486584	197500274	18	0.5253	57	0.4453
Q9Y4I1	MYO5A	-0.458525	-0.235734	0.233697	-2.18713	0.0287346	0.168111	4644	15	52307283	52529050	599	0.5258	721	0.5636
O75145	PPFIA3	-0.498775	-0.269802	0.237806	-2.39267	0.0167275	0.168111	8541	19	49119389	49151030	100	0.5263	203	0.2816
P55809	OXCT1	-0.252809	0.0470765	0.206916	-1.2588	0.208104	0.295921	5019	5	41730065	41870689	187	0.5264	257	0.5123
O94817	ATG12	-0.319172	-0.0471739	0.192892	-1.53578	0.124594	0.228706	9140	5	115828196	115841851	22	0.5278	79	0.6992
P00505	GOT2	-0.534531	-0.279598	0.214643	-2.59581	0.00943765	0.168111	2806	16	58707131	58734357	103	0.5279	357	0.5988
P49458	SRP9	-0.188291	-0.127596	0.0807339	-0.899165	0.368566	0.430576	6726	1	225777813	225790466	33	0.5292	210	0.5689
O00232	PSMD12	-0.343329	-0.135053	0.177546	-1.62975	0.103157	0.21223	5718	17	67340486	67366605	49	0.5294	117	0.6436
P23634	ATP2B4	-0.338694	-0.194678	0.169138	-1.61683	0.105916	0.214403	493	1	203626787	203744081	269	0.5309	373	0.6107
P20339	RAB5A	-0.185567	-0.157978	0.107225	-0.887875	0.374609	0.436364	5868	3	19947080	19985175	135	0.5311	297	0.4755
Q7Z6L0	PRRT2	-0.318188	-0.290052	0.141295	-1.58537	0.112884	0.221532	112476	16	29811394	29815881	6	0.5316	32	0.7852
P19367	HK1	-0.392248	-0.261112	0.251233	-1.87269	0.0611135	0.184723	3098	10	69269984	69401882	472	0.5319	609	0.647
P31323	PRKAR2B	-0.245343	-0.0281711	0.194334	-1.18761	0.234988	0.318887	5577	7	107044728	107161811	262	0.5321	368	0.4806
P26196	DDX6	-0.289992	-0.17041	0.13406	-1.38487	0.166093	0.26196	1656	11	118747763	118791263	95	0.5325	188	0.4114
Q16653	MOG	-0.449275	-0.211334	0.171372	-2.15124	0.0314589	0.168111	4340	6	29656981	29672372	109	0.5325	350	0.2006
P19525	EIF2AK2	-0.36906	-0.237746	0.191325	-1.77403	0.0760597	0.193599	5610	2	37104683	37157065	163	0.5327	479	0.5975
Q9H329	EPB41L4B	-0.380712	-0.299494	0.190745	-1.87703	0.060516	0.184189	54566	9	109171974	109320964	359	0.5336	504	0.18
Q9Y320	TMX2	-0.199671	-0.0680537	0.183433	-0.953824	0.340174	0.406586	51075	11	57712523	57740973	44	0.5338	105	0.6375
Q13449	LSAMP	-0.222484	-0.186535	0.0786514	-1.08731	0.276903	0.350002	4045	3	115802363	116445542	1482	0.534	1621	0.576
Q14195	DPYSL3	-0.350249	-0.158475	0.179939	-1.66832	0.0952536	0.20619	1809	5	147390808	147510260	126	0.5343	199	0.6419
Q8IV01	SYT12	-0.345781	-0.28949	0.179359	-1.70427	0.0883334	0.202373	91683	11	67006773	67050863	40	0.5367	90	0.7866
Q13367	AP3B2	-0.419214	-0.136249	0.260738	-1.9996	0.0455455	0.168111	8120	15	82659281	82709908	121	0.5368	248	0.5323
P30086	PEBP1	-0.379464	-0.206819	0.119889	-1.84496	0.0650457	0.186169	5037	12	118136065	118145585	26	0.5372	149	0.6775
O14910	LIN7A	-0.326329	-0.176126	0.183524	-1.55574	0.119771	0.225547	8825	12	80792520	80937923	407	0.5373	551	0.5239
P50148	GNAQ	-0.283478	-0.104622	0.128787	-1.34769	0.177759	0.272066	2776	9	77716274	78031449	525	0.5381	612	0.5784
O43295	SRGAP3	-0.447144	-0.205658	0.207894	-2.13221	0.032991	0.168111	9901	3	8980591	9362929	1153	0.5388	1265	0.4408
O75689	ADAP1	-0.459591	-0.171585	0.262703	-2.18101	0.0291839	0.168111	11033	7	897900	955407	265	0.5389	484	0.7287
Q12906	ILF3	-0.144887	-0.100272	0.111745	-0.689847	0.490292	0.535349	3609	19	10654261	10692419	55	0.539	146	0.4389
Q96PU8	QKI	-0.399533	-0.152413	0.155709	-1.90462	0.056831	0.180315	9444	6	163414643	163578596	301	0.5396	394	0.5173
Q92558	WASF1	-0.44665	-0.24369	0.231513	-2.13203	0.0330056	0.168111	8936	6	110099817	110189874	232	0.5398	332	0.5672
P0DP25	CALM3	-0.177653	-0.151845	0.0572587	-0.861822	0.388787	0.448643	808	19	46601255	46610782	16	0.5405	141	0.7415
O14980	XPO1	-0.396558	-0.116609	0.199857	-1.88293	0.059712	0.182782	7514	2	61477934	61538522	114	0.541	208	0.7535
O60268	KIAA0513	-0.182109	0.0655505	0.155429	-0.899905	0.368172	0.430429	9764	16	85027751	85094230	366	0.5413	628	0.6491
O14908	GIPC1	-0.399956	-0.184619	0.165965	-1.9081	0.0563802	0.180147	10755	19	14477759	14496149	76	0.5416	221	0.8452
Q9C040	TRIM2	-0.231537	-0.0373152	0.124501	-1.10235	0.270311	0.345481	23321	4	153152469	153339322	483	0.5423	595	0.6475
Q16204	CCDC6	-0.369865	-0.0545628	0.225076	-1.78931	0.0735664	0.192473	8030	10	59788747	59906656	408	0.5465	626	0.59
Q9P2R7	SUCLA2	-0.280109	0.0270372	0.208825	-1.38605	0.165734	0.26196	8803	13	47942656	48001326	264	0.5465	470	0.5693
Q96C19	EFHD2	-0.153678	-0.0447113	0.105142	-0.729388	0.465765	0.513109	79180	1	15409895	15430343	58	0.5485	195	0.6435
Q9H8M1	COQ10B	-0.353867	-0.204478	0.228633	-1.68644	0.0917138	0.203685	80219	2	197453507	197475135	20	0.55	59	0.5303
O43707	ACTN4	-0.456499	-0.25812	0.146134	-2.24602	0.024704	0.168111	81	19	38647616	38730531	250	0.5505	334	0.5613
Q9NS86	LANCL2	-0.463034	-0.269936	0.253338	-2.21323	0.0268831	0.168111	55915	7	55365448	55433742	181	0.5508	380	0.4305
P12931	SRC	-0.351963	-0.194496	0.214689	-1.67749	0.0934487	0.204407	6714	20	37344685	37405432	143	0.551	267	0.71
Q86UR5	RIMS1	-0.484006	-0.301861	0.233381	-2.35783	0.0183831	0.168111	22999	6	71886703	72403143	1362	0.5514	1503	0.5789
P57737	CORO7	-0.531174	-0.29707	0.229495	-2.5858	0.00971618	0.168111	79585	16	4354542	4416961	132	0.5515	235	0.4614
Q01082	SPTBN1	-0.478631	-0.225815	0.223975	-2.28281	0.0224426	0.168111	6711	2	54456317	54671446	691	0.5525	810	0.508
Q7L523	RRAGA	-0.289843	-0.119706	0.182561	-1.37414	0.169401	0.264061	10670	9	19049374	19051025	2	0.5534	199	0.3769
Q9Y217	MTMR6	-0.433037	-0.276715	0.184181	-2.12132	0.0338965	0.168111	9107	13	25246201	25287566	72	0.5539	113	0.579
O14531	DPYSL4	-0.518668	-0.210944	0.261864	-2.46597	0.0136655	0.168111	10570	10	132184987	132205776	68	0.5541	267	0.3525
Q9BPU6	DPYSL5	-0.470531	-0.222039	0.192324	-2.24942	0.0244869	0.168111	56896	2	26848101	26950351	152	0.5548	360	0.426
Q15008	PSMD6	-0.303418	-0.0996614	0.176059	-1.44031	0.149781	0.250695	9861	3	64010549	64024010	33	0.5564	129	0.349
Q9BTW9	TBCD	-0.363155	-0.110171	0.189446	-1.72391	0.0847255	0.199652	6904	17	82752060	82943186	631	0.5566	793	0.5836
P46781	RPS9	-0.33679	-0.27335	0.125672	-1.6754	0.0938587	0.204407	6203	19	54200557	54207647	64	0.558	179	0.8303
Q9UJC5	SH3BGRL2	-0.229744	-0.125863	0.127244	-1.09506	0.273494	0.347915	83699	6	79631283	79703670	190	0.558	337	0.5343
P05166	PCCB	-0.361653	-0.215077	0.194478	-1.72647	0.084265	0.199652	5096	3	136250325	136330171	121	0.5582	194	0.2721
P61626	LYZ	-0.270374	-0.190925	0.0945109	-1.31696	0.187855	0.278742	4069	12	69348354	69354233	18	0.5583	166	0.5973
Q5TF21	SOGA3	-0.405419	-0.162811	0.185546	-1.93108	0.0534749	0.177954	387104	6	127438406	127519355	182	0.5586	366	0.6602
P60866	RPS20	-0.342989	-0.26854	0.143944	-1.69471	0.0901317	0.202552	6224	8	56068180	56074581	20	0.559	188	0.499
P40121	CAPG	-0.335791	-0.0250126	0.16099	-1.61428	0.106468	0.214636	822	2	85394748	85418467	101	0.5605	254	0.5402
P62913	RPL11	-0.289814	-0.255545	0.101254	-1.44258	0.14914	0.250093	6135	1	23691779	23696425	12	0.5605	135	0.8433
P42765	ACAA2	-0.24129	-0.0893761	0.122831	-1.14496	0.252228	0.331617	10449	18	49783504	49813881	68	0.5615	197	0.7022
P51648	ALDH3A2	-0.392566	-0.150857	0.202275	-1.86244	0.0625433	0.184766	224	17	19648136	19677596	64	0.5617	175	0.6979
P00568	AK1	-0.141547	0.110882	0.129963	-0.705396	0.480565	0.527963	203	9	127866480	127877743	25	0.5626	112	0.4012
Q9Y3I0	RTCB	-0.425599	-0.183788	0.195351	-2.02887	0.0424735	0.168111	51493	22	32387575	32412287	95	0.5627	294	0.513
Q15366	PCBP2	-0.414526	-0.128179	0.246695	-1.976	0.0481568	0.170515	5094	12	53452102	53481162	24	0.564	100	0.5357
P55087	AQP4	-0.422087	-0.19783	0.230903	-2.01024	0.044408	0.168111	361	18	26852043	26865752	41	0.5644	175	0.3285
P35232	PHB	-0.280942	-0.193402	0.176671	-1.34034	0.180138	0.273879	5245	17	49404048	49414905	28	0.5646	139	0.875
Q8WW22	DNAJA4	-0.405294	-0.29692	0.176889	-2.00402	0.0450696	0.168111	55466	15	78264145	78282196	59	0.5654	224	0.8901
P50395	GDI2	-0.455066	-0.238125	0.178227	-2.19771	0.0279712	0.168111	2665	10	5765223	5813549	116	0.5659	262	0.4267
Q6VY07	PACS1	-0.374134	-0.238248	0.162247	-1.8172	0.069189	0.18854	55690	11	66070353	66244747	306	0.5686	384	0.5559
P20810	CAST	-0.365069	-0.32024	0.141618	-1.84106	0.0656153	0.186184	831	5	96662037	96774683	286	0.5687	481	0.5121
Q53H12	AGK	-0.27186	-0.232838	0.133076	-1.33014	0.183475	0.275534	55750	7	141551278	141654409	118	0.5698	195	0.5193
Q9Y4P3	TBL2	-0.406317	-0.276031	0.202808	-1.97817	0.0479115	0.170208	26608	7	73568944	73578683	24	0.5703	120	0.562
Q8WZA2	RAPGEF4	-0.486146	-0.292917	0.259616	-2.33759	0.0194097	0.168111	11069	2	172735279	173052893	866	0.5709	1028	0.7134
P63220	RPS21	-0.233077	-0.195816	0.0916369	-1.1386	0.25487	0.333675	6227	20	62387065	62388520	4	0.5713	232	0.2728
P05141	SLC25A5	-0.306792	-0.231197	0.143954	-1.49489	0.134945	0.239969	292	23	119468400	119471396	6	0.5724	100	0.5442
Q14247	CTTN	-0.376273	-0.191766	0.165034	-1.79629	0.0724499	0.191651	2017	11	70398506	70436584	74	0.5727	155	0.4912
P12814	ACTN1	-0.482722	-0.317716	0.189796	-2.39552	0.0165981	0.168111	87	14	68874123	68979366	392	0.573	575	0.8037
P53992	SEC24C	-0.38901	-0.127102	0.193892	-1.84448	0.0651153	0.186169	9632	10	73744281	73772175	34	0.5737	89	0.5869
P17987	TCP1	-0.416622	-0.167633	0.208186	-1.98059	0.0476387	0.170208	6950	6	159778498	159789703	34	0.5739	214	0.5079
Q6L8Q7	PDE12	-0.329292	0.00193153	0.221556	-1.62127	0.104961	0.214066	201626	3	57556252	57654979	246	0.574	367	0.6254
Q07065	CKAP4	-0.113683	-0.17607	0.0866678	-0.551688	0.581163	0.614898	10970	12	106237881	106247935	10	0.5746	147	0.8368
Q9UBC2	EPS15L1	-0.356815	-0.15281	0.192936	-1.69542	0.0899971	0.202552	58513	19	16355244	16472012	193	0.5755	336	0.6107
P60201	PLP1	-0.479546	-0.223489	0.183287	-2.29822	0.0215505	0.168111	5354	23	103776506	103792619	13	0.5771	87	0.5508
O60610	DIAPH1	-0.49778	-0.194181	0.293003	-2.36261	0.0181482	0.168111	1729	5	141515016	141619055	241	0.5772	367	0.6467
O75781	PALM	-0.265521	-0.129321	0.144513	-1.26461	0.206011	0.294512	5064	19	708953	748330	195	0.5789	445	0.2898
Q15119	PDK2	-0.236115	-0.15542	0.19324	-1.12241	0.261691	0.338429	5164	17	50094737	50111369	51	0.5797	157	0.7961
P61247	RPS3A	-0.276127	-0.204117	0.10282	-1.34859	0.177471	0.272066	6189	4	151099573	151104652	3	0.5811	76	0.7439
P28066	PSMA5	-0.312416	-0.248201	0.143554	-1.53266	0.125361	0.228706	5686	1	109399031	109426486	37	0.5812	102	0.7297
O75935	DCTN3	-0.27146	-0.0463612	0.150549	-1.29544	0.19517	0.283855	11258	9	34613545	34620523	5	0.5817	89	0.6976
P51452	DUSP3	-0.229392	0.0689486	0.163667	-1.13736	0.255391	0.333675	1845	17	43766121	43779000	31	0.582	123	0.7261
Q9GZS3	WDR61	-0.347839	-0.23151	0.165752	-1.68236	0.0925009	0.203803	80349	15	78283233	78299726	38	0.5828	143	0.5562
Q9GZZ9	UBA5	-0.319512	-0.110872	0.169595	-1.51467	0.129858	0.232729	79876	3	132654446	132678253	21	0.5829	84	0.5388
O75190	DNAJB6	-0.173115	-0.167852	0.0686082	-0.842372	0.399581	0.455528	10049	7	157337016	157417439	259	0.5834	525	0.8498
O00767	SCD	-0.247916	-0.115335	0.0704315	-1.1834	0.236654	0.320431	6319	10	100347015	100364831	31	0.5843	131	0.7326
Q92574	TSC1	-0.511085	-0.293738	0.257518	-2.46002	0.0138938	0.168111	7248	9	132891348	132945370	106	0.5846	255	0.7896
O95721	SNAP29	-0.348619	-0.169039	0.148045	-1.66305	0.0963049	0.206817	9342	22	20859004	20891214	72	0.5852	186	0.628
Q13642	FHL1	-0.129533	-0.0305176	-0.0027848	-0.617603	0.536838	0.57716	2273	23	136146702	136211359	65	0.5857	110	0.7695
P31150	GDI1	-0.301163	-0.148012	0.138515	-1.43604	0.150992	0.251236	2664	23	154436913	154443467	5	0.5868	57	0.5627
Q14344	GNA13	-0.307749	-0.0960161	0.131346	-1.4603	0.14421	0.248374	10672	17	65009289	65056802	20	0.5869	131	0.7519
P12235	SLC25A4	-0.348345	-0.266537	0.200683	-1.6902	0.0909907	0.203535	291	4	185143263	185150384	11	0.5871	165	0.7227
P06744	GPI	-0.148584	0.11979	0.135373	-0.743822	0.456986	0.505521	2821	19	34359592	34402413	89	0.5893	186	0.6657
Q9NPD7	NRN1	-0.281593	-0.197749	0.119454	-1.36385	0.172617	0.267792	51299	6	5997999	6007605	28	0.5896	278	0.7728
Q9Y5M8	SRPRB	-0.321349	-0.177294	0.173615	-1.53233	0.125443	0.228706	58477	3	133784033	133821492	72	0.5906	201	0.37
Q8N1G4	LRRC47	-0.509085	-0.217238	0.26096	-2.42339	0.0153775	0.168111	57470	1	3780220	3796504	74	0.5907	337	0.2321
P78406	RAE1	-0.357775	-0.164837	0.193928	-1.70329	0.0885151	0.202373	8480	20	57351089	57378463	99	0.5914	234	0.5382
Q9H936	SLC25A22	-0.387478	-0.262316	0.208211	-1.87155	0.0612706	0.184723	79751	11	790475	798269	10	0.5917	122	0.7708
Q9H6K4	OPA3	-0.435291	-0.252063	0.210339	-2.09168	0.0364686	0.168111	80207	19	45526863	45584864	178	0.5919	265	0.5016
O14561	NDUFAB1	-0.246781	-0.116046	0.138601	-1.17404	0.240381	0.322691	4706	16	23581014	23596341	53	0.5923	191	0.6407
Q16658	FSCN1	-0.193268	0.0281983	0.103425	-0.931038	0.351835	0.417106	6624	7	5592805	5606656	59	0.593	249	0.3702
Q14012	CAMK1	-0.460226	-0.28869	0.224294	-2.23635	0.0253304	0.168111	8536	3	9757345	9769987	18	0.5932	110	0.7146
Q9NVJ2	ARL8B	-0.268547	-0.149018	0.169149	-1.27904	0.200886	0.290143	55207	3	5122245	5180916	134	0.5935	266	0.8117
P53667	LIMK1	-0.468157	-0.318023	0.231446	-2.29653	0.0216468	0.168111	3984	7	74083777	74122525	59	0.5938	142	0.5603
Q9NZJ7	MTCH1	-0.342043	-0.236412	0.195881	-1.64082	0.100837	0.210276	23787	6	36968135	36986551	79	0.5958	245	0.7068
P80404	ABAT	-0.220855	-0.0145406	0.174882	-1.06845	0.285319	0.35763	18	16	8674587	8784575	646	0.596	892	0.5706
P02768	ALB	-0.312438	-0.271703	0.00687425	-1.61332	0.106677	0.214636	213	4	73404255	73421412	33	0.597	137	0.3404
Q13505	MTX1	-0.290144	-0.228214	0.170952	-1.39868	0.16191	0.25955	4580	1	155208699	155213839	7	0.5971	61	0.5349
Q9UQB3	CTNND2	-0.491478	-0.273525	0.230872	-2.36671	0.0179482	0.168111	1501	5	10971840	11904043	2483	0.5977	2583	0.5898
P78344	EIF4G2	-0.359337	-0.113869	0.186439	-1.70474	0.0882454	0.202373	1982	11	10797046	10809035	26	0.5984	156	0.7844
P04350	TUBB4A	-0.504713	-0.263348	0.221703	-2.4275	0.0152044	0.168111	10382	19	6494319	6502848	18	0.5987	127	0.1526
Q9NQX3	GPHN	-0.475874	-0.35753	0.185834	-2.40185	0.0163134	0.168111	10243	14	66507407	67181808	2239	0.5997	2363	0.6073
Q7RTP6	MICAL3	-0.505287	-0.226635	0.244882	-2.40906	0.0159948	0.168111	57553	22	17787649	18024559	920	0.6002	1112	0.7058
Q9UDT6	CLIP2	-0.483054	-0.25992	0.221022	-2.32057	0.0203112	0.168111	7461	7	74289475	74405943	254	0.6003	342	0.4528
Q7KZF4	SND1	-0.497682	-0.232071	0.249736	-2.37293	0.017649	0.168111	27044	7	127652119	128092607	647	0.6003	742	0.5885
Q08495	DMTN	-0.501174	-0.29773	0.213738	-2.45271	0.0141794	0.168111	2039	8	22049149	22082527	111	0.6005	232	0.7339
Q14152	EIF3A	-0.18196	0.0387933	0.126462	-0.884414	0.376474	0.4379	8661	10	119035029	119080822	61	0.601	159	0.4975
Q96DA2	RAB39B	-0.178923	-0.130528	0.136771	-0.852659	0.39385	0.451885	116442	23	155258234	155264589	4	0.6019	79	0.3842
Q7Z3C6	ATG9A	-0.374374	-0.11844	0.20789	-1.77864	0.0753008	0.193599	79065	2	219219380	219229688	22	0.6022	96	0.7547
Q8N5V2	NGEF	-0.400921	-0.273553	0.191271	-1.9573	0.0503145	0.174086	25791	2	232878686	233013241	526	0.6022	648	0.4156
Q5SSJ5	HP1BP3	-0.382467	-0.254034	0.154278	-1.8744	0.0608771	0.184723	50809	1	20742677	20787310	87	0.6029	174	0.6633
Q9UQ16	DNM3	-0.383993	-0.186807	0.196692	-1.83067	0.0671522	0.186476	26052	1	171841478	172418466	1308	0.6041	1464	0.6756
Q9Y5K8	ATP6V1D	-0.0650741	-0.131012	0.0706873	-0.311579	0.755361	0.768294	51382	14	67337864	67360003	91	0.6053	238	0.5384
Q9NZB2	FAM120A	-0.463397	-0.258973	0.233947	-2.21723	0.026609	0.168111	23196	9	93451696	93566115	312	0.6066	452	0.5568
Q8TCJ2	STT3B	-0.106162	-0.0859969	0.0486547	-0.506335	0.612622	0.640577	201595	3	31532501	31637622	177	0.6066	281	0.5925
P32004	L1CAM	-0.0174437	0.0536577	0.0460074	-0.0835751	0.933394	0.936313	3897	23	153861514	153886174	25	0.6067	72	0.8074
P63096	GNAI1	-0.406092	-0.245612	0.163188	-1.97801	0.0479296	0.170208	2770	7	80134824	80219409	191	0.6069	312	0.8254
P35527	KRT9	-0.375132	-0.253495	0.140899	-1.84538	0.0649838	0.186169	3857	17	41565841	41572058	8	0.6069	125	0.7408
P61266	STX1B	-0.155732	-0.0627319	0.0945021	-0.738658	0.460116	0.508633	112755	16	30989256	31010638	34	0.6076	90	0.6469
P62277	RPS13	-0.159362	-0.189444	0.036297	-0.789192	0.430001	0.48266	6207	11	17074392	17077673	8	0.6082	101	0.5278
Q9Y2X7	GIT1	-0.428407	-0.226587	0.210905	-2.04481	0.0408754	0.168111	28964	17	29573469	29589592	25	0.6083	77	0.5239
O60641	SNAP91	-0.148134	-0.0600734	0.113345	-0.702501	0.482368	0.528857	9892	6	83552885	83709408	274	0.6103	357	0.2418
Q96JE9	MAP6	-0.467871	-0.277782	0.261043	-2.23722	0.0252736	0.168111	4135	11	75586914	75668730	135	0.6105	253	0.4676
Q6IAN0	DHRS7B	-0.480914	-0.343288	0.224195	-2.38503	0.017079	0.168111	25979	17	21126275	21191972	105	0.6106	180	0.6133
Q9UQ03	CORO2B	-0.332007	-0.124228	0.201074	-1.57528	0.115194	0.222615	10391	15	68559275	68727806	463	0.6107	606	0.6382
O60716	CTNND1	-0.462207	-0.302659	0.193543	-2.27956	0.0226352	0.168111	1500	11	57761762	57819180	64	0.6111	112	0.5826
Q16799	RTN1	-0.245075	-0.0705239	0.145741	-1.16411	0.244383	0.325844	6252	14	59595976	59870839	523	0.6117	642	0.6187
Q9Y2D4	EXOC6B	-0.430604	-0.14819	0.238746	-2.04443	0.0409128	0.168111	23233	2	72175984	72826048	893	0.6122	997	0.6065
Q9P2R3	ANKFY1	-0.396952	-0.150984	0.181701	-1.88868	0.0589368	0.182499	51479	17	4163371	4264008	193	0.6131	280	0.6898
Q07020	RPL18	-0.26494	-0.250164	0.10281	-1.31557	0.188321	0.278906	6141	19	48615327	48619418	4	0.6138	93	0.8649
Q14982	OPCML	-0.270401	-0.225061	0.112747	-1.32724	0.18443	0.27602	4978	11	132414981	133532508	3605	0.6139	3722	0.6441
Q92529	SHC3	-0.463203	-0.297874	0.23916	-2.24818	0.0245658	0.168111	53358	9	89005771	89182072	492	0.6145	589	0.546
O43491	EPB41L2	-0.367653	-0.116288	0.155831	-1.74475	0.0810295	0.197525	2037	6	130828173	131063322	673	0.6152	838	0.5824
Q05193	DNM1	-0.369205	-0.178316	0.196545	-1.75947	0.0785004	0.195217	1759	9	128203355	128255249	111	0.6155	213	0.4358
P23297	S100A1	-0.235512	-0.0855853	0.114566	-1.11809	0.26353	0.340067	6271	1	153628397	153632037	8	0.6156	111	0.4686
Q7L0J3	SV2A	-0.341367	-0.261818	0.196705	-1.65522	0.0978814	0.208267	9900	1	149903318	149917882	19	0.6166	86	0.4981
Q9NXU5	ARL15	-0.289475	-0.0663136	0.171433	-1.38043	0.167458	0.262762	54622	5	53884748	54310586	1322	0.6169	1447	0.661
Q86VP6	CAND1	-0.394064	-0.229113	0.161855	-1.90653	0.0565829	0.180315	55832	12	67269281	67314692	133	0.6183	297	0.6636
P13591	NCAM1	-0.387355	-0.281046	0.111002	-1.9417	0.0521752	0.175896	4684	11	112961247	113278436	865	0.619	979	0.5478
Q9NR31	SAR1A	-0.370621	-0.161084	0.175715	-1.76614	0.0773742	0.194362	56681	10	70150204	70170529	71	0.619	214	0.5678
Q9NP81	SARS2	-0.352225	-0.0676759	0.228048	-1.69849	0.0894182	0.202552	54938	19	38915264	38930896	43	0.6191	166	0.7075
Q96CW1	AP2M1	-0.306541	-0.147791	0.192083	-1.45542	0.145555	0.248546	1173	3	184174846	184184091	20	0.6199	108	0.2568
P62195	PSMC5	-0.346043	-0.140399	0.18723	-1.64198	0.100595	0.210276	5705	17	63827410	63832027	7	0.6202	82	0.7919
Q8WY22	BRI3BP	0.0590843	-0.04692	0.000833629	0.281792	0.778104	0.788426	140707	12	124993648	125051845	247	0.6214	460	0.4496
Q86X55	CARM1	-0.276037	0.0366391	0.169464	-1.35599	0.175104	0.270324	10498	19	10871577	10922775	76	0.6218	148	0.631
Q99584	S100A13	-0.283496	-0.160933	0.181331	-1.35055	0.176842	0.272066	6284	1	153618799	153634092	32	0.6219	116	0.5242
Q71U36	TUBA1A	-0.401141	-0.169986	0.148736	-1.91364	0.0556674	0.180147	7846	12	49184795	49189324	5	0.6224	80	0.467
Q9P035	HACD3	-0.229583	-0.140996	0.134662	-1.09465	0.273671	0.347915	51495	15	65530489	65578355	89	0.6242	202	0.6152
O14807	MRAS	-0.0657444	-0.0749474	0.0369389	-0.313549	0.753864	0.767257	22808	3	138347648	138405535	125	0.6249	182	0.5935
Q96PE3	INPP4A	-0.412956	-0.0993837	0.236035	-1.9777	0.0479638	0.170208	3631	2	98444858	98594067	206	0.6251	275	0.635
P05026	ATP1B1	-0.195988	-0.200447	0.0852263	-0.961016	0.336546	0.403664	481	1	169106709	169132722	100	0.6256	245	0.879
Q9H019	MTFR1L	-0.43809	-0.26416	0.241305	-2.0958	0.0361015	0.168111	56181	1	25819906	25832942	28	0.6256	127	0.7997
Q5JU85	IQSEC2	-0.553004	-0.311006	0.253003	-2.68652	0.00722082	0.168111	23096	23	53227454	53321350	63	0.626	85	0.7595
Q9Y2J0	RPH3A	-0.32915	-0.268273	0.155448	-1.62106	0.105006	0.214066	22895	12	112791538	112898881	180	0.6292	306	0.838
Q8NF37	LPCAT1	-0.277828	-0.0416934	0.167746	-1.33166	0.182974	0.275534	79888	5	1461427	1525730	228	0.6294	353	0.4588
P45974	USP5	-0.524821	-0.291575	0.24159	-2.53795	0.0111512	0.168111	8078	12	6852118	6866632	2	0.6302	12	0.9196
Q27J81	INF2	-0.487767	-0.261836	0.181063	-2.37778	0.0174186	0.168111	64423	14	104689606	104719610	124	0.6321	276	0.8404
O14617	AP3D1	-0.384284	-0.11514	0.233994	-1.83291	0.0668172	0.186476	8943	19	2100988	2151620	202	0.6327	359	0.4775
P07954	FH	-0.127854	-0.00503095	0.115153	-0.612014	0.54053	0.579552	2271	1	241497557	241519785	30	0.6328	182	0.6604
P02533	KRT14	-0.369292	-0.266153	0.136535	-1.82686	0.0677232	0.186476	3861	17	41582279	41586895	9	0.6329	138	0.751
O43242	PSMD3	-0.280172	-0.0985784	0.168768	-1.32933	0.183742	0.275534	5709	17	39980768	39997960	66	0.6329	252	0.382
Q15006	EMC2	-0.11231	-0.119784	0.0712638	-0.536307	0.591747	0.623219	9694	8	108443624	108486907	122	0.6341	271	0.7206
P13798	APEH	-0.23522	-0.176055	0.0751562	-1.14599	0.251803	0.331393	327	3	49673130	49683504	9	0.6345	74	0.6069
P11498	PC	-0.525668	-0.216491	0.261671	-2.50196	0.0123518	0.168111	5091	11	66848522	66958376	199	0.6351	244	0.6411
Q5SQI0	ATAT1	-0.425016	-0.290503	0.196039	-2.08545	0.0370305	0.168111	79969	6	30626836	30646823	67	0.6353	217	0.458
O15020	SPTBN2	-0.472351	-0.177361	0.241388	-2.23987	0.0251006	0.168111	6712	11	66682496	66729237	42	0.6362	85	0.5632
Q9UQM7	CAMK2A	-0.490422	-0.298568	0.240635	-2.37979	0.0173236	0.168111	815	5	150219491	150289840	132	0.6368	244	0.3401
A8MVW0	FAM171A2	-0.307507	-0.218267	0.177696	-1.47335	0.14066	0.246507	284069	17	44353733	44363867	15	0.637	66	0.8759
Q15293	RCN1	-0.101056	0.0806283	0.108505	-0.495666	0.620131	0.646322	5954	11	32090931	32105726	45	0.6374	143	0.8123
Q14244	MAP7	-0.535176	-0.330568	0.178811	-2.67777	0.00741212	0.168111	9053	6	136342281	136550819	243	0.6386	325	0.6595
P13639	EEF2	-0.367381	-0.118654	0.165835	-1.74238	0.0814441	0.197634	1938	19	3976056	3985463	24	0.6399	112	0.8312
P04632	CAPNS1	-0.260912	-0.165579	0.111449	-1.25014	0.211252	0.298282	826	19	36139926	36150353	19	0.64	166	0.4592
Q14642	INPP5A	-0.351299	-0.229266	0.145359	-1.7096	0.087341	0.202151	3632	10	132537784	132783480	747	0.64	899	0.5713
P62879	GNB2	-0.295959	0.000184134	0.200362	-1.44813	0.147583	0.248546	2783	7	100673740	100679169	8	0.6402	81	0.5157
O00483	NDUFA4	-0.307978	-0.175084	0.155638	-1.46917	0.141787	0.247203	4697	7	10931953	10940186	22	0.6402	155	0.5006
P67936	TPM4	-0.297228	-0.209244	0.106746	-1.45277	0.146289	0.248546	7171	19	16067507	16103005	88	0.6407	274	0.7785
Q99873	PRMT1	-0.282677	-0.0200107	0.167072	-1.36275	0.172963	0.267792	3276	19	49677152	49688450	10	0.6408	73	0.8488
Q9UJ70	NAGK	-0.220288	0.040987	0.171032	-1.08416	0.278297	0.351486	55577	2	71068241	71078868	32	0.6417	294	0.6886
P36507	MAP2K2	-0.401382	-0.171607	0.195552	-1.91202	0.0558752	0.180147	5605	19	4090321	4124184	79	0.642	230	0.6512
Q6P1N0	CC2D1A	-0.27858	-0.181562	0.16068	-1.32914	0.183804	0.275534	54862	19	13906143	13930880	24	0.6431	118	0.4694
P09543	CNP	-0.477847	-0.231823	0.183331	-2.29738	0.0215985	0.168111	1267	17	41966741	41977736	16	0.6435	87	0.3718
Q9NTJ5	SACM1L	-0.381104	-0.132092	0.222356	-1.81012	0.0702796	0.18901	22908	3	45689262	45745409	199	0.6441	305	0.7349
P61421	ATP6V0D1	-0.282069	-0.210309	0.215856	-1.34501	0.178623	0.272868	9114	16	67438014	67481186	56	0.6449	119	0.4709
Q9P0J7	KCMF1	-0.406503	-0.205748	0.157982	-1.94973	0.0512101	0.175515	56888	2	84971108	85059472	136	0.6452	224	0.6159
O15075	DCLK1	-0.462003	-0.276992	0.208057	-2.2462	0.0246926	0.168111	9201	13	35768652	36132020	1112	0.6459	1325	0.7817
O95433	AHSA1	-0.289106	0.00192444	0.169767	-1.40412	0.160284	0.258648	10598	14	77457875	77469472	56	0.6471	177	0.551
P59998	ARPC4	-0.336323	-0.13317	0.173684	-1.59683	0.110305	0.218432	10093	3	9792495	9807105	24	0.6472	109	0.594
P51114	FXR1	-0.296395	-0.125217	0.142654	-1.41126	0.158169	0.256931	8087	3	180912446	180982753	138	0.6481	243	0.6787
Q9Y230	RUVBL2	-0.257506	-0.180323	0.100938	-1.2457	0.212876	0.29952	10856	19	48993353	49015926	65	0.6487	171	0.6975
Q96RQ3	MCCC1	-0.452814	-0.118624	0.220925	-2.15427	0.0312201	0.168111	56922	3	183015218	183099587	156	0.651	268	0.6772
Q96N66	MBOAT7	-0.161888	-0.118159	0.12918	-0.771122	0.440636	0.491754	79143	19	54173412	54189882	41	0.6519	218	0.8486
Q7L1Q6	BZW1	-0.175168	0.0359145	0.0875873	-0.842679	0.399409	0.455528	9689	2	200811544	200823846	17	0.6521	94	0.3789
P68104	EEF1A1	-0.457046	-0.229415	0.225274	-2.18013	0.0292494	0.168111	1915	6	73515750	73521032	13	0.6521	125	0.5032
P51970	NDUFA8	-0.106253	-0.105477	0.0993465	-0.506484	0.612518	0.640577	4702	9	122132466	122159819	98	0.6533	222	0.83
Q66K74	MAP1S	-0.575076	-0.276893	0.27657	-2.74429	0.00606486	0.168111	55201	19	17719494	17734515	58	0.6539	224	0.4399
Q66LE6	PPP2R2D	-0.319487	-0.0901038	0.159817	-1.51607	0.129503	0.232729	55844	10	131900644	131969980	137	0.6561	154	0.632
Q9Y3E5	PTRH2	-0.400268	-0.20455	0.216563	-1.9084	0.0563417	0.180147	51651	17	59697306	59707495	22	0.6564	72	0.4806
P61981	YWHAG	-0.213127	-0.0180802	0.0962111	-1.01415	0.310511	0.380779	7532	7	76326791	76359025	70	0.658	194	0.774
P54886	ALDH18A1	-0.328406	-0.127234	0.16919	-1.55859	0.119097	0.225272	5832	10	95605929	95656810	184	0.6587	314	0.6975
P22695	UQCRC2	-0.337066	-0.236554	0.215865	-1.60984	0.107434	0.214636	7385	16	21953288	21983347	27	0.6594	53	0.6183
Q05084	ICA1	-0.426907	-0.184298	0.218384	-2.03241	0.0421135	0.168111	3382	7	8113184	8262687	569	0.6633	738	0.6933
P11277	SPTB	-0.579948	-0.328912	0.239438	-2.84974	0.0043761	0.168111	6710	14	64746283	64879893	491	0.6633	701	0.5702
P86790	CCZ1B	-0.44801	-0.200063	0.237633	-2.13298	0.0329278	0.168111	221960	7	6798935	6826295	21	0.6634	188	0.4745
P50990	CCT8	-0.427177	-0.201051	0.19539	-2.03729	0.0416224	0.168111	10694	21	29056322	29073797	23	0.6637	118	0.5543
Q9NR46	SH3GLB2	-0.278527	0.0165722	0.198029	-1.36945	0.17086	0.265819	56904	9	129007792	129028353	25	0.6645	97	0.8597
Q8N6T3	ARFGAP1	-0.387213	-0.201306	0.226107	-1.84522	0.0650077	0.186169	55738	20	63272785	63289793	38	0.6646	281	0.7164
P49419	ALDH7A1	-0.461518	-0.311058	0.145317	-2.31598	0.0205604	0.168111	501	5	126541841	126595390	150	0.6647	274	0.7218
P55786	NPEPPS	-0.175792	-0.00284271	0.0911136	-0.838214	0.401912	0.45786	9520	17	47522950	47623276	162	0.6647	275	0.5367
O43581	SYT7	-0.245559	-0.21906	0.150271	-1.18761	0.23499	0.318887	9066	11	61513716	61588396	105	0.6653	175	0.6908
P43490	NAMPT	-0.335897	-0.177543	0.111269	-1.61701	0.105879	0.214403	10135	7	106248285	106285732	83	0.666	196	0.7741
P28072	PSMB6	-0.217974	-0.210644	0.130117	-1.05778	0.290156	0.361624	5694	17	4796144	4798503	7	0.6664	136	0.08258
O43301	HSPA12A	-0.457316	-0.274331	0.207727	-2.22107	0.0263476	0.168111	259217	10	116671192	116850814	464	0.6665	529	0.6505
O94910	ADGRL1	-0.348002	-0.202452	0.201351	-1.65954	0.0970094	0.207471	22859	19	14147737	14206248	114	0.6683	218	0.7157
P10586	PTPRF	-0.389353	-0.247101	0.188965	-1.88071	0.0600135	0.183168	5792	1	43522238	43623672	240	0.6684	329	0.731
O75899	GABBR2	-0.322564	-0.245454	0.161358	-1.572	0.115954	0.222937	9568	9	98288082	98709197	1510	0.6688	1638	0.6256
Q14240	EIF4A2	-0.165443	0.0237855	0.115892	-0.79829	0.424703	0.478052	1974	3	186783572	186789897	12	0.6692	131	0.7357
Q92561	PHYHIP	-0.289774	-0.0607627	0.169553	-1.38307	0.166646	0.262059	9796	8	22219703	22232338	37	0.6696	149	0.5798
O43426	SYNJ1	-0.234657	-0.0873899	0.168291	-1.11478	0.264947	0.3408	8867	21	32628759	32728040	127	0.6701	217	0.7308
P05109	S100A8	-0.0307952	-0.05989	-0.0106533	-0.147205	0.88297	0.889068	6279	1	153390032	153422578	76	0.6702	165	0.379
P68366	TUBA4A	-0.441218	-0.220596	0.211115	-2.10496	0.0352968	0.168111	7277	2	219249711	219254608	7	0.6705	92	0.7006
Q9HB71	CACYBP	-0.18771	-0.0485963	0.103295	-0.890433	0.373235	0.435395	27101	1	174999435	175012027	21	0.6711	92	0.6799
Q8NDA8	MROH1	-0.466419	-0.230608	0.251984	-2.2236	0.0261765	0.168111	727957	8	144148016	144261940	84	0.6721	133	0.02181
P18077	RPL35A	-0.325256	-0.255281	0.139522	-1.60171	0.109223	0.217631	6165	3	197950181	197955851	12	0.6722	154	0.9538
P0DMV9	HSPA1B	-0.343402	-0.156534	0.164323	-1.63687	0.10166	0.210451	3304	6	31827735	31830254	8	0.6724	150	0.3954
P09496	CLTA	-0.0898852	0.0928801	0.11057	-0.442926	0.65782	0.680298	1211	9	36190856	36212062	53	0.6736	180	0.5285
P62166	NCS1	-0.248035	-0.155506	0.148028	-1.18271	0.236927	0.320431	23413	9	130172578	130237304	217	0.6737	452	0.2477
Q9BXS5	AP1M1	-0.17386	0.0478606	0.119901	-0.846097	0.3975	0.454124	8907	19	16197854	16235345	123	0.6747	260	0.7914
Q9H9B4	SFXN1	-0.0335803	-0.059796	0.0112456	-0.160188	0.872733	0.879311	94081	5	175478511	175529742	194	0.6747	330	0.1125
P36969	GPX4	-0.467188	-0.214648	0.258993	-2.22371	0.0261697	0.168111	2879	19	1103926	1106789	7	0.6757	201	0.7541
P21281	ATP6V1B2	-0.295937	-0.181424	0.207501	-1.40977	0.15861	0.25724	526	8	20197193	20221696	47	0.6762	209	0.9491
Q9BY44	EIF2A	-0.27929	-0.148864	0.130695	-1.33197	0.182873	0.275534	83939	3	150546690	150586016	102	0.6776	247	0.2587
Q9BQ69	MACROD1	-0.352849	-0.0306874	0.246325	-1.7298	0.0836682	0.199378	28992	11	63998556	64166130	370	0.6791	464	0.6971
P61160	ACTR2	-0.323638	-0.149129	0.173115	-1.54092	0.123338	0.227919	10097	2	65227695	65271253	108	0.6797	220	0.8122
Q9NP97	DYNLRB1	-0.141889	-0.0675254	0.0725651	-0.675459	0.499385	0.54306	83658	20	34516355	34540958	22	0.6806	84	0.75
P62266	RPS23	-0.354122	-0.269107	0.129291	-1.75709	0.0789047	0.195313	6228	5	82273320	82278416	20	0.6806	101	0.7982
Q14C86	GAPVD1	-0.431067	-0.242918	0.188586	-2.07863	0.0376532	0.168111	26130	9	125241663	125365011	171	0.6823	263	0.6771
P48444	ARCN1	-0.353992	-0.144691	0.184523	-1.68158	0.0926514	0.203803	372	11	118572387	118603033	58	0.6831	148	0.5314
Q9H1K1	ISCU	-0.302486	-0.167036	0.163818	-1.44232	0.149214	0.250093	23479	12	108561463	108569384	23	0.6831	184	0.5362
Q15349	RPS6KA2	-0.248549	-0.0226329	0.1491	-1.19262	0.23302	0.318098	6196	6	166409366	166862550	1609	0.6845	1715	0.7446
O43617	TRAPPC3	-0.357284	-0.258958	0.163784	-1.74922	0.0802552	0.196895	27095	1	36136569	36156053	24	0.6845	82	0.8416
P61158	ACTR3	-0.366481	-0.106646	0.194548	-1.7414	0.0816149	0.19775	10096	2	113889934	113961554	236	0.6846	367	0.7179
O75508	CLDN11	-0.437669	-0.188995	0.138923	-2.09812	0.0358963	0.168111	5010	3	170418865	170434691	43	0.6847	138	0.6502
O94967	WDR47	-0.489155	-0.24639	0.239203	-2.33415	0.019589	0.168111	22911	1	108970211	109042228	184	0.6856	329	0.4828
Q08209	PPP3CA	-0.297153	-0.212821	0.150804	-1.43289	0.151891	0.251947	5530	4	101023430	101347471	724	0.686	828	0.7359
Q8WXD9	CASKIN1	-0.456155	-0.275478	0.211477	-2.21364	0.0268548	0.168111	57524	16	2177183	2196464	21	0.6873	118	0.5683
P62280	RPS11	-0.337207	-0.236682	0.146363	-1.64551	0.0998666	0.210176	6205	19	49496365	49499712	9	0.6876	124	0.5202
Q5T5C0	STXBP5	-0.252377	0.00500091	0.180966	-1.23054	0.218496	0.305792	134957	6	147204358	147390476	260	0.6909	326	0.7061
Q86TV6	TTC7B	-0.304968	-0.146243	0.161965	-1.45291	0.146252	0.248546	145567	14	90540588	90816479	882	0.6916	1105	0.7219
Q8N6D5	ANKRD29	-0.126516	-0.0474053	0.0765899	-0.600016	0.548496	0.586296	147463	18	23598926	23662892	85	0.6923	180	0.8044
Q96AG4	LRRC59	-0.354936	-0.239994	0.224749	-1.69455	0.0901634	0.202552	55379	17	50381233	50397553	52	0.693	195	0.6771
Q02750	MAP2K1	-0.23918	0.0238993	0.164861	-1.16854	0.242593	0.324536	5604	15	66386873	66491544	294	0.6939	424	0.674
P45985	MAP2K4	-0.269013	-0.0611577	0.190904	-1.28908	0.197373	0.286059	6416	17	12020818	12143831	178	0.6947	269	0.7679
P08237	PFKM	-0.428742	-0.209355	0.206626	-2.04472	0.040884	0.168111	5213	12	48105402	48146404	104	0.6961	237	0.6589
Q9HBF4	ZFYVE1	-0.455902	-0.290851	0.199782	-2.23477	0.0254338	0.168111	53349	14	72969445	73027212	245	0.6967	380	0.8085
P37235	HPCAL1	-0.388296	-0.207941	0.147292	-1.87066	0.0613939	0.184723	3241	2	10302889	10427617	487	0.6968	700	0.5789
P43034	PAFAH1B1	-0.192842	0.0272273	0.124673	-0.933447	0.350591	0.416245	5048	17	2593629	2685617	183	0.6973	289	0.5697
Q14416	GRM2	-0.381477	-0.242894	0.212062	-1.82608	0.0678394	0.186476	2912	3	51707033	51718616	7	0.698	52	0.6875
P53680	AP2S1	-0.209513	-0.132494	0.140772	-0.998353	0.31811	0.387727	1175	19	46838158	46850995	18	0.6997	70	0.7497
Q9Y6K8	AK5	-0.452813	-0.305705	0.223592	-2.21615	0.0266829	0.168111	26289	1	77281977	77559969	1062	0.7001	1175	0.7372
P48426	PIP4K2A	-0.427805	-0.128519	0.207419	-2.02998	0.0423607	0.168111	5305	10	22534837	22714574	540	0.7005	657	0.6006
Q9UEW8	STK39	-0.546638	-0.315191	0.241913	-2.67003	0.00758518	0.168111	27347	2	167954020	168247595	980	0.7008	1052	0.7519
Q9NZ45	CISD1	-0.154404	-0.109541	0.067842	-0.73677	0.461263	0.50955	55847	10	58269102	58289259	56	0.7027	254	0.6557
P53985	SLC16A1	-0.319189	-0.169008	0.124165	-1.52636	0.126923	0.2303	6566	1	112911847	112956353	50	0.7032	113	0.7347
Q13424	SNTA1	-0.295485	-0.0548446	0.139602	-1.40555	0.159858	0.25822	6640	20	33407957	33443892	44	0.7033	61	0.7316
O43837	IDH3B	-0.206847	-0.0571503	0.156521	-0.985855	0.324206	0.393363	3420	20	2658394	2664219	12	0.7035	172	0.6574
Q16836	HADH	-0.372952	-0.178782	0.14196	-1.78168	0.0748037	0.193471	3033	4	107989714	108035175	117	0.7036	251	0.5571
Q9Y2Q3	GSTK1	-0.351824	-0.0273568	0.263239	-1.73448	0.0828348	0.198605	373156	7	143263429	143269129	1	0.7038	25	0.4744
O95182	NDUFA7	-0.168229	-0.158957	0.136881	-0.802459	0.422288	0.476337	4701	19	8308762	8321396	37	0.7041	253	0.3381
Q6NTF9	RHBDD2	-0.459496	-0.310375	0.268175	-2.2197	0.0264408	0.168111	57414	7	75878999	75888926	20	0.7042	121	0.8139
Q9H7D7	WDR26	-0.503891	-0.305818	0.222568	-2.46702	0.0136252	0.168111	80232	1	224385143	224434299	84	0.7042	200	0.6624
Q8N4Q0	ZADH2	-0.332371	-0.114537	0.195714	-1.57791	0.114588	0.222615	284273	18	75197323	75209326	26	0.7067	180	0.7714
Q96P47	AGAP3	-0.437086	-0.274406	0.191129	-2.13466	0.0327906	0.168111	116988	7	151085831	151144436	136	0.707	221	0.7206
A7KAX9	ARHGAP32	-0.451155	-0.20956	0.219861	-2.15113	0.0314672	0.168111	9743	11	128965060	129267015	735	0.7072	858	0.7531
Q9UNA1	ARHGAP26	-0.421712	-0.175875	0.232206	-2.00096	0.0453985	0.168111	23092	5	142770380	143229007	1101	0.7078	1199	0.6939
O94811	TPPP	-0.368624	-0.1477	0.211948	-1.74758	0.0805394	0.196895	11076	5	659862	693395	169	0.7079	245	0.6937
P49441	INPP1	-0.262744	-0.0261992	0.140593	-1.25743	0.2086	0.296095	3628	2	190343470	190371665	99	0.709	191	0.703
P82663	MRPS25	-0.407576	-0.291496	0.211043	-1.99148	0.0464295	0.168111	64432	3	15042251	15065311	43	0.7098	138	0.8275
P02511	CRYAB	-0.343526	-0.173311	0.0867004	-1.66505	0.0959055	0.206817	1410	11	111908620	111913213	9	0.71	87	0.4838
P54652	HSPA2	-0.456665	-0.157842	0.176475	-2.17562	0.0295853	0.168111	3306	14	64540468	64543237	4	0.7101	139	0.8907
Q12959	DLG1	-0.454311	-0.231127	0.222386	-2.16763	0.0301885	0.168111	1739	3	197042560	197299272	624	0.7109	783	0.7224
P21283	ATP6V1C1	-0.3017	-0.187426	0.213294	-1.43737	0.150615	0.250869	528	8	103021020	103073057	129	0.711	318	0.7043
P46777	RPL5	-0.267047	-0.204644	0.0999408	-1.30567	0.191665	0.281788	6125	1	92832037	92841924	12	0.7114	115	0.8724
Q96B97	SH3KBP1	-0.295639	-0.240691	0.127115	-1.45337	0.146123	0.248546	30011	23	19533965	19887626	208	0.7125	250	0.7435
Q92556	ELMO1	-0.50377	-0.287336	0.217419	-2.45228	0.0141964	0.168111	9844	7	36852906	37449409	1793	0.7128	1886	0.7414
P22234	PAICS	-0.338243	-0.205358	0.221722	-1.61247	0.106862	0.214636	10606	4	56435749	56461368	58	0.713	171	0.4554
Q9P0K9	FRRS1L	-0.259859	-0.164024	0.0833892	-1.25578	0.209197	0.296095	23732	9	109136188	109167291	125	0.7148	269	0.7144
P35609	ACTN2	-0.53398	-0.343675	0.209204	-2.66006	0.00781348	0.168111	88	1	236686454	236764631	277	0.7171	522	0.7214
P61020	RAB5B	-0.251191	-0.199964	0.125111	-1.21536	0.224231	0.310593	5869	12	55973913	55996683	41	0.7176	78	0.851
Q9H078	CLPB	-0.190375	-0.0796161	0.0922968	-0.905772	0.365058	0.427411	81570	11	72292425	72434680	204	0.7183	291	0.7454
P40429	RPL13A	-0.289774	-0.259027	0.133009	-1.43139	0.152322	0.252401	23521	19	49487554	49492308	10	0.7189	136	0.4129
O75534	CSDE1	-0.3892	-0.226618	0.193386	-1.86219	0.062578	0.184766	7812	1	114716913	114758050	74	0.7195	140	0.5803
P30101	PDIA3	-0.0914428	0.119118	0.10513	-0.453926	0.649883	0.673828	2923	15	43746392	43772606	34	0.7207	96	0.7338
Q9Y6V0	PCLO	-0.416849	-0.271319	0.221667	-2.01189	0.0442333	0.168111	27445	7	82754005	83162881	1143	0.722	1270	0.7482
P63010	AP2B1	-0.398542	-0.216789	0.218146	-1.9006	0.0573559	0.180744	163	17	35586899	35726417	433	0.7241	583	0.6804
P14621	ACYP2	-0.382596	-0.191285	0.164791	-1.82642	0.0677888	0.186476	98	2	54115273	54305300	582	0.7251	706	0.656
Q8NBS9	TXNDC5	-0.201729	0.0300405	0.138487	-0.980757	0.326714	0.394913	81567	6	7881250	7910814	105	0.7261	259	0.3773
O15066	KIF3B	-0.216613	-0.185338	0.0655569	-1.06238	0.288067	0.359683	9371	20	32277651	32335011	88	0.7264	152	0.7219
Q8IWB7	WDFY1	-0.228107	0.0524405	0.146285	-1.11955	0.262908	0.339537	57590	2	223875343	223945387	183	0.7269	279	0.4383
P30084	ECHS1	-0.361114	-0.150406	0.191789	-1.71539	0.0862748	0.20131	1892	10	133362483	133373404	29	0.727	219	0.8074
Q8NFV4	ABHD11	-0.321916	-0.202477	0.190156	-1.53565	0.124626	0.228706	83451	7	73736094	73738885	5	0.7272	84	0.8961
P45880	VDAC2	-0.318	-0.232565	0.190504	-1.52576	0.127073	0.23031	7417	10	75210154	75231448	40	0.7272	136	0.7014
P42356	PI4KA	-0.429195	-0.189108	0.240709	-2.0387	0.0414816	0.168111	5297	22	20707691	20858812	395	0.7286	508	0.7304
P04899	GNAI2	-0.343392	-0.141825	0.15853	-1.63573	0.101898	0.210546	2771	3	50226688	50259354	38	0.7291	95	0.6565
P55290	CDH13	-0.252575	-0.219441	0.0977519	-1.24263	0.214006	0.300846	1012	16	82626794	83796610	6521	0.7293	6798	0.7797
P61221	ABCE1	-0.382803	-0.207916	0.183031	-1.82781	0.06758	0.186476	6059	4	145098004	145129524	19	0.7302	61	0.3082
Q01484	ANK2	-0.423439	-0.176643	0.227293	-2.01072	0.0443563	0.168111	287	4	112818083	113383740	1581	0.7303	1719	0.7855
P36915	GNL1	-0.328706	-0.146312	0.151738	-1.56681	0.117162	0.223124	2794	6	30541377	30557594	26	0.7315	154	0.5735
Q6ZVL6	KIAA1549L	-0.291248	-0.239514	0.147896	-1.42216	0.154982	0.254089	25758	11	33376568	33674102	627	0.7315	736	0.726
O60313	OPA1	-0.309188	-0.23874	0.1663	-1.49994	0.133631	0.238289	4976	3	193593144	193697811	256	0.7332	408	0.7502
O75880	SCO1	-0.126878	0.103877	0.133353	-0.631374	0.527797	0.56856	6341	17	10680332	10697568	22	0.7335	147	0.513
P51649	ALDH5A1	-0.449441	-0.2884	0.218869	-2.18773	0.0286906	0.168111	7915	6	24494969	24537207	207	0.7362	507	0.9035
P08670	VIM	-0.412658	-0.24525	0.102545	-2.04572	0.0407858	0.168111	7431	10	17227935	17237593	13	0.7363	159	0.971
O00217	NDUFS8	-0.108606	-0.1171	0.11585	-0.517667	0.604691	0.633938	4728	11	68030617	68036647	14	0.7373	114	0.691
Q5VUB5	FAM171A1	-0.4784	-0.287225	0.226765	-2.32115	0.0202798	0.168111	221061	10	15211643	15371059	564	0.7399	700	0.7669
Q9UJW0	DCTN4	-0.384925	-0.106883	0.192067	-1.82852	0.0674732	0.186476	51164	5	150708747	150759095	95	0.7403	186	0.5918
O95782	AP2A1	-0.370297	-0.177394	0.213424	-1.76224	0.0780315	0.195217	160	19	49766923	49807112	90	0.7411	172	0.405
Q14457	BECN1	-0.337225	-0.19281	0.136197	-1.62032	0.105165	0.214066	8678	17	42810132	42824292	5	0.7418	21	0.6577
Q9H1K0	RBSN	-0.387313	-0.165169	0.177279	-1.84603	0.0648898	0.186169	64145	3	15070069	15099157	59	0.743	188	0.8913
Q16401	PSMD5	-0.394149	-0.0874974	0.210001	-1.88359	0.0596222	0.182782	5711	9	120814779	120843021	36	0.7433	118	0.7105
O43432	EIF4G3	-0.485739	-0.12382	0.301898	-2.34416	0.0190713	0.168111	8672	1	20806292	21177320	711	0.7442	814	0.7611
Q9UM22	EPDR1	-0.467708	-0.215041	0.274581	-2.22123	0.0263371	0.168111	54749	7	37920561	37951941	126	0.7442	340	0.6529
O00410	IPO5	-0.46647	-0.128619	0.238153	-2.22059	0.02638	0.168111	3843	13	97953638	98024296	101	0.7442	174	0.6046
Q9NRZ7	AGPAT3	-0.419935	-0.163551	0.245007	-1.99165	0.0464107	0.168111	56894	21	43865160	43987594	277	0.7455	457	0.6745
Q9UDW1	UQCR10	0.0865873	0.0216833	-0.0400697	0.41222	0.680179	0.701595	29796	22	29767369	29770413	9	0.7455	155	0.8263
Q9H4G0	EPB41L1	-0.362192	-0.163656	0.203434	-1.72177	0.0851128	0.199755	2036	20	36064891	36232799	183	0.7462	245	0.6603
O14949	UQCRQ	-0.0831814	-0.0442458	0.0566786	-0.395239	0.692667	0.710836	27089	5	132866627	132868844	9	0.7473	114	0.7252
Q8N608	DPP10	-0.25204	-0.235178	0.163405	-1.22203	0.221698	0.308148	57628	2	114442322	115845752	3407	0.7475	3460	0.7508
Q9UID3	VPS51	-0.327667	-0.16081	0.178549	-1.56119	0.118482	0.224374	738	11	65096115	65111860	24	0.7477	116	0.5185
Q92973	TNPO1	-0.389358	-0.0798092	0.210445	-1.86431	0.0622799	0.184766	3842	5	72816591	72914388	155	0.748	241	0.7398
P63027	VAMP2	-0.139551	-0.105141	0.133909	-0.663008	0.507327	0.550204	6844	17	8159147	8162975	6	0.7483	117	0.7375
P62899	RPL31	-0.176697	-0.201158	0.0536611	-0.87441	0.381896	0.441964	6160	2	101002229	101019693	41	0.7485	161	0.6794
O75915	ARL6IP5	-0.104302	-0.00686349	0.00259983	-0.496129	0.619804	0.646322	10550	3	69084939	69106088	71	0.7498	182	0.506
Q96A65	EXOC4	-0.463954	-0.206682	0.222425	-2.21182	0.0269804	0.168111	60412	7	133253067	134065761	1401	0.7501	1578	0.8028
P04181	OAT	-0.245379	0.0223639	0.177651	-1.20228	0.229258	0.314299	4942	10	124397303	124418976	69	0.7504	198	0.5696
P63000	RAC1	-0.36621	-0.229315	0.181543	-1.75987	0.0784321	0.195217	5879	7	6374495	6403967	145	0.7506	353	0.4704
Q12860	CNTN1	-0.287314	-0.238113	0.127492	-1.41096	0.158259	0.256931	1272	12	40692442	41072412	1300	0.7508	1424	0.7553
P07900	HSP90AA1	-0.138007	0.103474	0.0967174	-0.679957	0.496532	0.540691	3320	14	102080738	102139759	150	0.751	275	0.6616
Q96JH7	VCPIP1	-0.432555	-0.249153	0.230198	-2.06645	0.0387876	0.168111	80124	8	66630253	66667217	48	0.7523	111	0.4619
Q9UDY4	DNAJB4	-0.387857	-0.26567	0.186453	-1.89037	0.05871	0.182148	11080	1	77979217	78018721	96	0.7532	189	0.8556
Q9Y4F1	FARP1	-0.453619	-0.261886	0.20486	-2.19321	0.0282934	0.168111	10160	13	98142562	98449773	1100	0.7578	1208	0.7509
Q13619	CUL4A	-0.410323	-0.147291	0.207877	-1.94536	0.051734	0.175596	8451	13	113208193	113265078	120	0.7583	178	0.8506
Q8IV38	ANKMY2	-0.383659	-0.22446	0.165343	-1.85007	0.064305	0.186169	57037	7	16599776	16645817	173	0.7586	295	0.7031
P49207	RPL34	-0.354581	-0.232525	0.152623	-1.72369	0.0847651	0.199652	6164	4	108620566	108630484	16	0.7586	137	0.8742
Q08554	DSC1	-0.282612	-0.227081	0.0760075	-1.40247	0.160775	0.259034	1823	18	31129236	31162856	146	0.7588	263	0.6661
O43237	DYNC1LI2	-0.377965	-0.182947	0.179318	-1.80233	0.0714949	0.190495	1783	16	66720893	66751622	61	0.7588	141	0.6865
O00170	AIP	-0.27009	-0.11187	0.0628135	-1.28959	0.197195	0.286059	9049	11	67483029	67491108	20	0.759	109	0.8783
O43175	PHGDH	-0.2756	0.00175224	0.143273	-1.32973	0.18361	0.275534	26227	1	119711737	119744226	75	0.7592	163	0.7198
P21266	GSTM3	-0.209292	0.00467502	0.12407	-1.00623	0.314307	0.383966	2947	1	109733932	109741038	13	0.7605	122	0.6573
O14880	MGST3	-0.297632	-0.214483	0.176112	-1.42484	0.154206	0.253689	4259	1	165630873	165656136	92	0.7606	299	0.588
O75306	NDUFS2	-0.275734	-0.19662	0.197014	-1.31484	0.188567	0.278906	4720	1	161197419	161214395	32	0.7607	116	0.3277
Q9NYI0	PSD3	-0.278863	-0.140246	0.169316	-1.3266	0.184644	0.27602	23362	8	18527303	19086921	2739	0.761	2906	0.7028
Q99816	TSG101	-0.344628	-0.231933	0.149579	-1.67666	0.0936112	0.204407	7251	11	18480311	18526956	116	0.7615	249	0.7855
P51674	GPM6A	-0.262315	-0.284591	0.0811698	-1.32954	0.183672	0.275534	2823	4	175632937	176002691	1026	0.7622	1226	0.397
Q07002	CDK18	-0.463985	-0.276336	0.227642	-2.23964	0.0251154	0.168111	5129	1	205504556	205532793	118	0.7624	308	0.8768
Q96BY7	ATG2B	-0.515854	-0.278178	0.240368	-2.48104	0.0131009	0.168111	55102	14	96281258	96363341	158	0.7629	246	0.6694
O75110	ATP9A	-0.255274	-0.170043	0.11927	-1.2224	0.221558	0.308148	10079	20	51596775	51768411	777	0.763	939	0.6668
Q16531	DDB1	-0.489203	-0.374015	0.229106	-2.45112	0.0142423	0.168111	1642	11	61299447	61333212	19	0.7637	38	0.6158
Q05329	GAD2	-0.249615	-0.00191923	0.157864	-1.20725	0.227339	0.312528	2572	10	26216307	26304562	209	0.7637	381	0.4337
Q99613	EIF3C	-0.350799	0.011465	0.2313	-1.7372	0.0823542	0.198605	8663	16	28688558	28735730	2	0.7641	4	0.8898
O14576	DYNC1I1	-0.362421	-0.21309	0.179445	-1.7331	0.0830792	0.198894	1780	7	95772506	96110322	867	0.7661	1003	0.6741
P29401	TKT	-0.215574	0.0208658	0.102835	-1.03622	0.3001	0.371134	7086	3	53224707	53256114	148	0.7665	239	0.8312
P40123	CAP2	-0.329716	-0.201967	0.124576	-1.59702	0.110262	0.218432	10486	6	17393216	17557792	386	0.768	514	0.8175
Q9BZC7	ABCA2	-0.422995	-0.208099	0.178682	-2.02077	0.0433049	0.168111	20	9	137007234	137028974	38	0.7684	144	0.8398
P06753	TPM3	-0.265482	-0.197136	0.10641	-1.29137	0.196577	0.285607	7170	1	154155304	154192135	55	0.7685	103	0.5823
P49802	RGS7	-0.370038	-0.168386	0.205517	-1.7601	0.0783932	0.195217	6000	1	240775514	241357230	1850	0.7686	2001	0.6827
P05023	ATP1A1	-0.351054	-0.277903	0.162516	-1.73134	0.0833928	0.19927	476	1	116372185	116404774	43	0.7694	124	0.4828
P30519	HMOX2	-0.168958	-0.00549819	0.0479894	-0.801403	0.4229	0.476691	3163	16	4474703	4510347	105	0.7699	207	0.6891
P23471	PTPRZ1	-0.187452	-0.229581	0.0821391	-0.929466	0.352649	0.417762	5803	7	121873105	122062036	433	0.7702	557	0.7587
P04406	GAPDH	-0.213209	-0.139146	0.121293	-1.01676	0.309272	0.37984	2597	12	6534405	6538375	12	0.7711	141	0.09716
Q7L2E3	DHX30	-0.411587	-0.241373	0.242718	-1.96308	0.0496381	0.173135	22907	3	47802909	47850196	37	0.7715	87	0.9332
Q9P2U7	SLC17A7	-0.279837	-0.198186	0.171652	-1.33608	0.181526	0.275206	57030	19	49429398	49441551	22	0.7719	138	0.1623
Q9H9H5	MAP6D1	-0.455853	-0.239916	0.119866	-2.24506	0.0247655	0.168111	79929	3	183815876	183825605	28	0.7756	162	0.5454
Q7RTN6	STRADA	-0.354348	-0.199343	0.15008	-1.69951	0.0892242	0.202552	92335	17	63702832	63741970	75	0.7756	160	0.7062
Q9HB21	PLEKHA1	-0.334996	-0.224841	0.175679	-1.61	0.1074	0.214636	59338	10	122374578	122432355	134	0.7768	263	0.6201
O60506	SYNCRIP	-0.098448	-0.0287961	0.0959461	-0.467751	0.639963	0.664832	10492	6	85607784	85643850	56	0.7771	108	0.6261
Q66K14	TBC1D9B	-0.475857	-0.250069	0.21192	-2.28356	0.0223986	0.168111	23061	5	179862071	179907856	74	0.7775	161	0.7019
O60831	PRAF2	-0.29956	-0.0993977	0.198415	-1.42546	0.154025	0.253689	11230	23	49071156	49074045	1	0.7777	10	0.6777
P32119	PRDX2	-0.331002	-0.216858	0.166054	-1.5906	0.111702	0.220111	7001	19	12796820	12801910	16	0.7788	131	0.5745
Q13363	CTBP1	-0.103805	-0.0616409	0.0601289	-0.494376	0.621041	0.646851	1487	4	1211440	1250248	128	0.7796	273	0.8457
Q92572	AP3S1	-0.200658	-0.01345	0.149951	-0.965386	0.334353	0.402243	1176	5	115841922	115914081	115	0.7798	170	0.8183
Q8NBU5	ATAD1	-0.375341	-0.258756	0.192265	-1.82034	0.0687099	0.187752	84896	10	87751851	87841349	170	0.7806	238	0.7295
Q02410	APBA1	-0.513948	-0.160118	0.27806	-2.44673	0.0144172	0.168111	320	9	69427532	69673617	618	0.781	705	0.7789
Q9UK22	FBXO2	-0.172533	0.0533289	0.0988442	-0.83659	0.402825	0.458574	26232	1	11648361	11654831	16	0.781	139	0.6556
P23515	OMG	-0.312227	-0.199674	0.100581	-1.52327	0.127692	0.230928	4974	17	31294650	31297362	1	0.783	58	0.4781
P06733	ENO1	-0.235688	-0.0925401	0.0979299	-1.12257	0.261623	0.338429	2023	1	8861000	8879092	24	0.7832	143	0.9473
Q9ULJ8	PPP1R9A	-0.468057	-0.300026	0.222648	-2.28637	0.022234	0.168111	55607	7	94907202	95296415	637	0.7835	717	0.7805
O95139	NDUFB6	-0.0767233	-0.0955047	0.0472382	-0.366177	0.714233	0.730632	4712	9	32553526	32573184	41	0.7843	99	0.462
P19022	CDH2	-0.321179	-0.151764	0.115032	-1.53325	0.125216	0.228706	1000	18	27932879	28177481	475	0.7847	569	0.8114
Q6DN14	MCTP1	-0.4984	-0.315106	0.267284	-2.41348	0.015802	0.168111	79772	5	94703690	95284575	1431	0.786	1558	0.8343
O75251	NDUFS7	-0.241595	-0.174705	0.176199	-1.15194	0.249348	0.329723	374291	19	1383884	1395589	31	0.7862	126	0.9171
Q99683	MAP3K5	-0.397588	-0.222189	0.210447	-1.89706	0.0578223	0.180793	4217	6	136557046	136793051	402	0.7864	480	0.8214
P53999	SUB1	-0.153196	-0.121773	0.100655	-0.730547	0.465057	0.512681	10923	5	32585499	32604079	38	0.7869	159	0.511
Q9UBM7	DHCR7	-0.43033	-0.128178	0.196548	-2.04053	0.0412988	0.168111	1717	11	71434411	71448431	31	0.7881	190	0.8456
Q12797	ASPH	-0.138218	-0.0639718	0.117596	-0.655454	0.512177	0.554531	444	8	61500556	61714640	531	0.7884	663	0.7891
O15079	SNPH	-0.56339	-0.275652	0.280434	-2.68778	0.00719362	0.168111	9751	20	1266297	1309327	116	0.7889	250	0.8065
P13611	VCAN	-0.324352	-0.157401	0.135283	-1.54714	0.121831	0.22592	1462	5	83471674	83582303	228	0.7893	352	0.2501
Q01814	ATP2B2	-0.293037	-0.186025	0.128908	-1.40744	0.159299	0.258096	491	3	10324023	10707993	1389	0.7895	1533	0.7546
Q13555	CAMK2G	-0.435468	-0.235629	0.224619	-2.0781	0.0377017	0.168111	818	10	73812501	73874591	73	0.7895	159	0.4257
Q9Y4D1	DAAM1	-0.449107	-0.251417	0.245662	-2.14304	0.0321116	0.168111	23002	14	59188611	59371405	556	0.7913	674	0.7671
P41222	PTGDS	-0.35632	-0.155856	0.134417	-1.69954	0.0892202	0.202552	5730	9	136977504	136981742	7	0.7914	173	0.4947
Q9NQC3	RTN4	-0.314298	-0.0658171	0.136838	-1.49245	0.135582	0.240762	57142	2	54972189	55112616	426	0.7921	598	0.8226
Q96A23	CPNE4	-0.488207	-0.323113	0.205309	-2.41691	0.0156542	0.168111	131034	3	131533560	132285547	2914	0.7948	3081	0.8267
P01034	CST3	-0.0865724	-0.012313	0.0118246	-0.411646	0.6806	0.701595	1471	20	23627897	23638048	32	0.7949	183	0.9551
P57088	TMEM33	-0.356974	-0.20444	0.191312	-1.703	0.0885696	0.202373	55161	4	41935120	41960807	69	0.7952	205	0.7421
Q8IZR5	CMTM4	-0.200858	-0.170184	0.124679	-0.960664	0.336722	0.403664	146223	16	66598214	66696707	217	0.7954	306	0.8387
O94973	AP2A2	-0.372568	-0.180559	0.224678	-1.77109	0.0765473	0.193968	161	11	925809	1012245	298	0.796	399	0.7741
P48651	PTDSS1	-0.178607	-0.181563	0.138898	-0.854251	0.392967	0.451885	9791	8	96261886	96334552	125	0.7964	206	0.5541
Q9Y5S2	CDC42BPB	-0.501049	-0.291882	0.231882	-2.43167	0.0150306	0.168111	9578	14	102932379	103057405	283	0.7984	399	0.6722
P16389	KCNA2	-0.411909	-0.248699	0.18412	-1.99451	0.0460977	0.168111	3737	1	110593580	110631514	96	0.7987	199	0.5784
P24588	AKAP5	-0.408289	-0.213555	0.24339	-1.94546	0.0517219	0.175596	9495	14	64465499	64474503	11	0.8011	143	0.4464
Q8N987	NECAB1	-0.174561	0.0470204	0.132378	-0.852055	0.394185	0.451946	64168	8	90791693	90959402	337	0.8012	430	0.7472
Q9UPT6	MAPK8IP3	-0.352209	-0.180933	0.170252	-1.67975	0.0930074	0.203803	23162	16	1706183	1770317	136	0.8025	205	0.6244
Q9NQC7	CYLD	-0.524997	-0.345622	0.250008	-2.58744	0.00966999	0.168111	1540	16	50742050	50801936	89	0.803	173	0.9538
Q8N573	OXR1	-0.268846	-0.0836177	0.167637	-1.27774	0.201343	0.290165	55074	8	106270178	106752694	1290	0.8034	1386	0.8132
Q6PKG0	LARP1	-0.525444	-0.266601	0.210569	-2.54067	0.011065	0.168111	23367	5	154682663	154817607	281	0.8037	409	0.7727
P12277	CKB	-0.192685	-0.0163194	0.0746111	-0.914966	0.360211	0.423591	1152	14	103519658	103522859	5	0.8042	112	0.8083
P63167	DYNLL1	-0.45099	-0.195097	0.22178	-2.14875	0.0316561	0.168111	8655	12	120469857	120498495	82	0.8052	214	0.8107
O43920	NDUFS5	-0.110437	-0.0896987	0.119818	-0.524294	0.600075	0.62951	4725	1	39026295	39034636	34	0.8055	230	0.8497
P50991	CCT4	-0.367222	-0.157637	0.187561	-1.74787	0.0804881	0.196895	10575	2	61868127	61888671	63	0.806	172	0.9498
O95970	LGI1	-0.217763	-0.143474	0.122786	-1.03856	0.29901	0.370071	9211	10	93757809	93798159	125	0.8069	261	0.7497
Q9BRK0	REEP2	-0.118727	-0.126715	0.0072208	-0.579575	0.562202	0.597992	51308	5	138439001	138446969	21	0.81	143	0.6875
Q6DN90	IQSEC1	-0.495997	-0.279757	0.24593	-2.38275	0.0171852	0.168111	9922	3	12897043	13282998	1205	0.8116	1371	0.7675
P11182	DBT	-0.370973	-0.20285	0.211374	-1.76882	0.0769256	0.194362	1629	1	100186922	100249863	137	0.8117	250	0.8673
P18621	RPL17	-0.294439	-0.230429	0.109168	-1.4496	0.147173	0.248546	6139	18	49488481	49492565	10	0.8126	200	0.9337
P27144	AK4	-0.339178	-0.133326	0.216036	-1.60976	0.107452	0.214636	205	1	65147549	65232145	182	0.813	344	0.5613
O00479	HMGN4	-0.15145	-0.191927	-0.00156997	-0.759348	0.447646	0.497246	10473	6	26538344	26546937	18	0.813	148	0.9169
P04216	THY1	-0.312961	-0.206721	0.164174	-1.49909	0.133852	0.238289	7070	11	119417945	119423536	10	0.8136	107	0.9739
Q16891	IMMT	-0.313701	-0.264683	0.166439	-1.53795	0.124063	0.228208	10989	2	86143932	86195770	140	0.8163	273	0.8724
Q8N111	CEND1	-0.325465	-0.214384	0.216232	-1.55207	0.120648	0.225547	51286	11	787110	790126	5	0.8172	107	0.8428
O94919	ENDOD1	-0.300876	-0.13062	0.11601	-1.43469	0.151378	0.251498	23052	11	95089810	95132651	141	0.8177	290	0.7739
Q9H4M9	EHD1	-0.247717	-0.00835149	0.140275	-1.19093	0.233683	0.318193	10938	11	64852727	64879713	60	0.8179	135	0.6811
Q92736	RYR2	-0.46759	-0.26218	0.241015	-2.23605	0.0253502	0.168111	6262	1	237042238	237833988	2751	0.8192	2863	0.8514
P47870	GABRB2	-0.135539	-0.153535	0.0846851	-0.651717	0.514584	0.55657	2561	5	161288419	161548124	631	0.8195	757	0.867
Q7Z4S6	KIF21A	-0.453938	-0.262226	0.219513	-2.18385	0.028975	0.168111	55605	12	39293228	39443390	245	0.8223	324	0.8326
P53618	COPB1	-0.465419	-0.193234	0.239497	-2.21284	0.0269098	0.168111	1315	11	14457503	14499895	72	0.8233	154	0.8861
P35611	ADD1	-0.370236	-0.177238	0.195375	-1.76436	0.0776729	0.194668	118	4	2843727	2930076	179	0.8238	330	0.9201
Q96SW2	CRBN	-0.496093	-0.18162	0.262295	-2.3522	0.0186638	0.168111	51185	3	3149633	3179717	135	0.8243	372	0.7027
P78417	GSTO1	-0.106532	0.0368594	0.0474571	-0.508509	0.611097	0.639817	9446	10	104254194	104267464	17	0.8244	134	0.3102
P78371	CCT2	-0.378772	-0.163671	0.175178	-1.80534	0.0710236	0.18987	10576	12	69585428	69601577	49	0.8245	145	0.7678
P14867	GABRA1	-0.248425	-0.214814	0.140472	-1.20338	0.228831	0.313982	2554	5	161847191	161899959	138	0.8246	269	0.8639
Q15365	PCBP1	-0.368494	-0.150058	0.215452	-1.74695	0.0806483	0.196895	5093	2	70087453	70089203	2	0.8248	91	0.1697
Q6PCB7	SLC27A1	-0.45567	-0.183822	0.201179	-2.17178	0.0298738	0.168111	376497	19	17468774	17506168	108	0.8255	236	0.6788
Q8N9I9	DTX3	-0.532466	-0.333716	0.263525	-2.60213	0.00926545	0.168111	196403	12	57604327	57609804	7	0.8257	80	0.5218
P13987	CD59	-0.257185	-0.135263	0.113558	-1.22654	0.219996	0.306579	966	11	33703010	33736479	102	0.8262	231	0.7551
P36957	DLST	-0.262739	-0.201726	0.171273	-1.25505	0.209462	0.296095	1743	14	74881891	74903747	57	0.8285	164	0.7552
Q9NP72	RAB18	-0.242875	-0.191873	0.125092	-1.17092	0.241634	0.323794	22931	10	27504174	27542237	50	0.8293	190	0.9248
O94874	UFL1	-0.422886	-0.200592	0.223353	-2.01541	0.0438636	0.168111	23376	6	96521826	96555276	39	0.8303	136	0.8225
Q13332	PTPRS	-0.122231	-0.0779144	0.0778782	-0.582263	0.560391	0.596461	5802	19	5205503	5340803	475	0.8312	658	0.8754
O95670	ATP6V1G2	-0.377814	-0.263342	0.241965	-1.8069	0.07078	0.189851	534	6	31544451	31546848	12	0.8315	249	0.7324
Q9UGM6	WARS2	-0.288506	-0.197926	0.136689	-1.38895	0.164851	0.261544	10352	1	119031216	119140788	280	0.8325	438	0.7974
Q4G0F5	VPS26B	-0.176297	0.0428946	0.1279	-0.858351	0.3907	0.450203	112936	11	134224605	134247792	40	0.8327	118	0.8363
Q8N145	LGI3	-0.344177	-0.226353	0.107497	-1.69278	0.0904997	0.20274	203190	8	22146830	22156831	17	0.8328	143	0.8424
P61088	UBE2N	-0.139519	0.025229	0.0736597	-0.667404	0.504515	0.548267	7334	12	93408312	93443445	69	0.8329	179	0.7916
Q13557	CAMK2D	-0.465671	-0.310515	0.243497	-2.26907	0.0232653	0.168111	817	4	113451032	113762133	712	0.8336	850	0.8784
Q53GQ0	HSD17B12	-0.42349	-0.243849	0.161834	-2.06216	0.0391938	0.168111	51144	11	43680593	43856619	379	0.8357	529	0.6208
P27816	MAP4	-0.484903	-0.288838	0.154858	-2.40547	0.016153	0.168111	4134	3	47850690	48089279	246	0.8366	291	0.8221
P62857	RPS28	-0.323978	-0.221152	0.114149	-1.58721	0.112468	0.221076	6234	19	8321500	8322396	4	0.838	144	0.5918
Q13561	DCTN2	-0.193465	-0.0314299	0.102712	-0.919536	0.357816	0.422238	10540	12	57530050	57547331	23	0.8383	76	0.8704
P17152	TMEM11	-0.318094	-0.177545	0.151979	-1.51794	0.12903	0.232545	8834	17	21197950	21214595	38	0.8388	133	0.8097
Q8N568	DCLK2	-0.442799	-0.20683	0.24019	-2.10924	0.0349254	0.168111	166614	4	150078274	150257457	538	0.8391	673	0.8414
P62917	RPL8	-0.248449	-0.23665	0.0803477	-1.23566	0.216586	0.303675	6132	8	144789767	144792420	7	0.8391	153	0.5893
Q9Y4G6	TLN2	-0.480511	-0.18737	0.254438	-2.27848	0.0226995	0.168111	83660	15	62390575	62844631	1171	0.8393	1313	0.8298
Q9H479	FN3K	-0.355688	-0.132077	0.194148	-1.68621	0.0917576	0.203685	64122	17	82735576	82751197	53	0.8394	241	0.8214
Q13636	RAB31	-0.249661	-0.122345	0.123242	-1.18996	0.234062	0.318351	11031	18	9708231	9862556	594	0.8398	827	0.4719
O95831	AIFM1	-0.383529	-0.237442	0.183601	-1.84817	0.0645796	0.186169	9131	23	130129362	130165887	42	0.8401	90	0.8782
Q14738	PPP2R5D	-0.453933	-0.235846	0.216379	-2.16775	0.030179	0.168111	5528	6	42984499	43012345	76	0.8402	225	0.3438
P22059	OSBP	-0.310335	-0.0655452	0.157653	-1.47707	0.139658	0.245802	5007	11	59574398	59616144	61	0.8412	126	0.7729
Q6X4W1	NSMF	-0.437933	-0.245251	0.208205	-2.10013	0.0357192	0.168111	26012	9	137447570	137459357	9	0.8415	40	0.5653
Q9BZV1	UBXN6	-0.476401	-0.323285	0.218537	-2.35014	0.0187677	0.168111	80700	19	4445006	4457794	39	0.8415	220	0.9303
Q9UIJ7	AK3	-0.147746	-0.0721268	0.0616592	-0.704152	0.481339	0.528452	50808	9	4709556	4742043	185	0.8417	359	0.7894
P26373	RPL13	-0.299311	-0.255458	0.12533	-1.47978	0.138935	0.244892	6137	16	89560657	89566829	25	0.8417	147	0.6424
Q96I99	SUCLG2	-0.255289	0.0385531	0.193864	-1.26306	0.206568	0.295045	8801	3	67360460	67654614	1103	0.8451	1189	0.8625
P40926	MDH2	-0.329155	-0.143108	0.165612	-1.56718	0.117074	0.223124	4191	7	76048019	76067508	46	0.8457	151	0.7568
Q9Y4E6	WDR7	-0.433753	-0.227881	0.235765	-2.06836	0.0386082	0.168111	23335	18	56651343	57029805	903	0.8479	1029	0.8525
Q969E2	SCAMP4	-0.424703	-0.221898	0.10623	-2.08622	0.0369606	0.168111	113178	19	1905374	1926013	71	0.8482	199	0.96
P00367	GLUD1	-0.447064	-0.216814	0.225666	-2.13172	0.0330313	0.168111	2746	10	87050202	87095019	105	0.8493	210	0.8433
P34932	HSPA4	-0.238574	-0.148687	0.0931445	-1.14223	0.253362	0.332301	3308	5	133051970	133105017	127	0.8496	244	0.8984
Q96HS1	PGAM5	-0.363756	-0.298343	0.199279	-1.78834	0.0737229	0.192473	192111	12	132710807	132722737	46	0.8514	170	0.8501
Q8WXS5	CACNG8	-0.349389	-0.284356	0.144491	-1.73551	0.0826521	0.198605	59283	19	53963036	53990215	84	0.8548	169	0.6696
Q9UHD2	TBK1	-0.518183	-0.346619	0.239726	-2.5619	0.0104111	0.168111	29110	12	64452060	64502119	77	0.8562	147	0.8595
P62070	RRAS2	-0.247461	-0.125308	0.113822	-1.17991	0.238037	0.32085	22800	11	14277920	14364506	104	0.8568	165	0.9086
P10636	MAPT	-0.210104	-0.0670563	0.133611	-0.997227	0.318656	0.387803	4137	17	45894382	46028334	710	0.8587	980	0.887
Q8N5K1	CISD2	-0.0686294	-0.0508989	0.0491602	-0.32678	0.743835	0.758494	493856	4	102868978	102892807	45	0.8597	126	0.9444
P23786	CPT2	-0.213557	0.0500164	0.154706	-1.04963	0.293888	0.36514	1376	1	53196429	53214197	25	0.8598	147	0.4363
Q9Y3D6	FIS1	-0.281583	-0.166293	0.126955	-1.34502	0.17862	0.272868	51024	7	101239612	101245090	11	0.8607	234	0.9515
Q8N5S9	CAMKK1	-0.427279	-0.239971	0.210157	-2.04438	0.0409179	0.168111	84254	17	3860315	3894891	104	0.8612	240	0.8169
Q12955	ANK3	-0.519654	-0.291904	0.20955	-2.54069	0.0110642	0.168111	288	10	60026298	60733526	2151	0.862	2316	0.7718
Q9C0H5	ARHGAP39	-0.440105	-0.279078	0.201948	-2.14597	0.0318769	0.168111	80728	8	144529179	144700520	237	0.8622	287	0.8264
O60282	KIF5C	-0.383913	-0.0999103	0.205462	-1.82839	0.0674937	0.186476	3800	2	148875223	149026759	270	0.8627	339	0.8699
P20073	ANXA7	-0.406752	-0.219349	0.201447	-1.94151	0.0521987	0.175896	310	10	73375431	73414083	66	0.8631	105	0.8558
P05386	RPLP1	-0.363333	-0.227929	0.161492	-1.75715	0.0788941	0.195313	6176	15	69452820	69455545	4	0.8631	45	0.6892
Q5TCZ1	SH3PXD2A	-0.47926	-0.144108	0.36222	-2.33316	0.0196412	0.168111	9644	10	103594027	103855482	683	0.8647	788	0.8988
Q9H492	MAP1LC3A	-0.322765	-0.217701	0.118082	-1.57724	0.114742	0.222615	84557	20	34546830	34560345	23	0.8672	72	0.8379
Q02246	CNTN2	-0.322881	-0.200397	0.115582	-1.56779	0.116932	0.223124	6900	1	205043202	205078043	127	0.8673	259	0.7509
P21579	SYT1	-0.0928428	-0.136454	0.094284	-0.443271	0.65757	0.680298	6857	12	78863993	79452008	1348	0.868	1409	0.7749
Q03001	DST	-0.449853	-0.186364	0.204216	-2.14407	0.0320287	0.168111	667	6	56457987	56954628	924	0.8708	1028	0.8603
O75891	ALDH1L1	-0.179388	0.0544668	0.143088	-0.880284	0.378707	0.439223	10840	3	126103561	126181526	312	0.872	530	0.8508
Q8TCZ2	CD99L2	-0.142076	-0.120183	0.068729	-0.678687	0.497337	0.5412	83692	23	150766336	150898816	211	0.8727	270	0.9226
Q9BPX5	ARPC5L	-0.107783	-0.0477789	0.0685676	-0.51159	0.608938	0.637973	81873	9	124862135	124877733	11	0.8731	144	0.6777
P61201	COPS2	-0.286561	-0.0215028	0.147702	-1.37502	0.169128	0.263893	9318	15	49125274	49155657	74	0.8731	211	0.802
Q9NZ01	TECR	-0.308507	-0.182695	0.17585	-1.47122	0.141234	0.246507	9524	19	14527768	14565980	113	0.8733	239	0.9407
O60884	DNAJA2	-0.286107	-0.200677	0.105141	-1.39433	0.163221	0.260245	10294	16	46955362	46973714	18	0.8745	76	0.6916
Q15049	MLC1	-0.490912	-0.240779	0.233942	-2.34233	0.0191651	0.168111	23209	22	50059391	50085929	168	0.8747	368	0.9594
P36405	ARL3	-0.165206	0.00695757	0.0967858	-0.790309	0.429348	0.482603	403	10	102673727	102714433	68	0.8757	160	0.8563
P62829	RPL23	-0.373731	-0.265581	0.166466	-1.83286	0.0668254	0.186476	9349	17	38850068	38853800	7	0.8766	130	0.8359
Q9NYB9	ABI2	-0.334885	-0.216004	0.199086	-1.59823	0.109994	0.218373	10152	2	203327874	203432173	140	0.8789	213	0.8728
P22314	UBA1	-0.230895	0.0827078	0.155458	-1.1476	0.251136	0.331158	7317	23	47190800	47215128	11	0.8793	17	0.8566
Q96HU8	DIRAS2	-0.385667	-0.233235	0.176058	-1.85995	0.062894	0.184766	54769	9	90609832	90643105	116	0.8794	294	0.949
P11441	UBL4A	-0.443196	-0.293503	0.159765	-2.19915	0.027869	0.168111	8266	23	154483717	154486670	8	0.8804	63	0.6841
Q9Y296	TRAPPC4	-0.296816	-0.194315	0.135929	-1.42717	0.153533	0.253622	51399	11	119018531	119023674	19	0.8814	146	0.6259
Q13085	ACACA	-0.461503	-0.214655	0.225497	-2.2005	0.0277731	0.168111	31	17	37084992	37406822	488	0.8829	602	0.7431
O14994	SYN3	-0.241834	-0.212202	0.131632	-1.17375	0.240498	0.322691	8224	22	32508022	33058391	1660	0.8832	1785	0.8912
Q14194	CRMP1	-0.349301	-0.106408	0.178048	-1.65725	0.0974703	0.208179	1400	4	5820764	5893083	274	0.8838	484	0.8826
Q13613	MTMR1	-0.460847	-0.193962	0.255941	-2.18646	0.0287832	0.168111	8776	23	150692983	150765102	93	0.884	157	0.913
P19338	NCL	-0.202326	-0.0808334	0.0753138	-0.964139	0.334977	0.402475	4691	2	231454748	231464494	22	0.8845	172	0.7143
P52306	RAP1GDS1	-0.298136	0.0133817	0.165963	-1.45194	0.14652	0.248546	5910	4	98261376	98443861	395	0.8853	480	0.9125
Q9NQW6	ANLN	-0.467835	-0.200254	0.186573	-2.23183	0.0256279	0.168111	54443	7	36389803	36453791	196	0.8868	322	0.9188
O95372	LYPLA2	-0.262479	-0.031284	0.162223	-1.26006	0.20765	0.295787	11313	1	23790785	23795539	3	0.8868	31	0.5179
O00562	PITPNM1	-0.529894	-0.275605	0.268896	-2.52995	0.0114087	0.168111	9600	11	67491767	67505372	8	0.8872	83	0.7245
Q14764	MVP	-0.445631	-0.274791	0.151566	-2.202	0.0276665	0.168111	9961	16	29820394	29848039	30	0.8879	58	0.8194
Q13572	ITPK1	-0.239719	0.022228	0.145586	-1.16465	0.244162	0.325844	3705	14	92936914	93115918	483	0.8889	707	0.9398
P15311	EZR	-0.366093	-0.141946	0.209771	-1.73557	0.0826415	0.198605	7430	6	158765741	158819424	215	0.889	376	0.9489
Q15070	OXA1L	-0.1956	-0.177664	0.0878423	-0.949493	0.342372	0.408604	5018	14	22766522	22771789	15	0.8894	185	0.8061
Q86W74	ANKRD46	-0.173949	-0.044469	0.148685	-0.830183	0.406436	0.46203	157567	8	100509752	100559786	119	0.8906	214	0.9403
Q96PV0	SYNGAP1	-0.502211	-0.331419	0.237381	-2.47148	0.0134566	0.168111	8831	6	33420070	33453689	63	0.8912	177	0.9227
P31946	YWHAB	-0.190487	0.0203389	0.109755	-0.916907	0.359193	0.423025	7529	20	44885599	44908532	39	0.8916	168	0.9658
P62316	SNRPD2	-0.192802	0.057944	0.247218	-0.974391	0.329864	0.397821	6633	19	45687454	45692311	9	0.892	91	0.8846
P78356	PIP4K2B	-0.374926	-0.136991	0.22809	-1.7807	0.0749637	0.193471	8396	17	38765689	38799965	76	0.8923	193	0.7261
P17858	PFKL	-0.420484	-0.184662	0.222756	-2.00101	0.0453926	0.168111	5211	21	44300034	44327381	109	0.8951	267	0.9825
Q9UKF7	PITPNC1	-0.211691	0.0170293	0.117958	-1.01991	0.307771	0.378386	26207	17	67377281	67697263	821	0.8957	908	0.9026
Q8WVM8	SCFD1	-0.352315	-0.0529922	0.182647	-1.68893	0.0912353	0.203535	23256	14	30622254	30735828	254	0.8972	344	0.8991
P14406	COX7A2	-0.230574	-0.168956	0.158359	-1.09958	0.271519	0.346748	1347	6	75237675	75254885	40	0.8986	125	0.8844
P53677	AP3M2	-0.221208	-0.0173331	0.171528	-1.06839	0.285347	0.35763	10947	8	42152946	42171183	26	0.8991	90	0.6366
Q13131	PRKAA1	-0.437351	-0.224103	0.179823	-2.09843	0.0358684	0.168111	5562	5	40759379	40798195	73	0.8999	178	0.8012
Q9Y2Z4	YARS2	-0.488841	-0.29383	0.237752	-2.36958	0.0178097	0.168111	51067	12	32725091	32755961	81	0.9009	262	0.9084
Q9P1U1	ACTR3B	-0.251768	-0.161454	0.130296	-1.20158	0.229527	0.314399	57180	7	152759749	152887759	375	0.9012	581	0.9139
P53621	COPA	-0.423745	-0.157572	0.229655	-2.00892	0.0445474	0.168111	1314	1	160288587	160343564	78	0.9019	166	0.7044
P31948	STIP1	-0.341055	-0.0412648	0.176332	-1.63781	0.101462	0.210451	10963	11	64185272	64204548	44	0.9056	136	0.9308
Q9H0E2	TOLLIP	-0.209527	-0.0103808	0.142563	-1.00726	0.313809	0.383651	54472	11	1274368	1309662	114	0.9064	248	0.9239
Q8IXI2	RHOT1	-0.462126	-0.248412	0.255148	-2.20396	0.0275287	0.168111	55288	17	32142454	32253374	152	0.907	253	0.8723
Q01813	PFKP	-0.449061	-0.215496	0.231809	-2.14093	0.0322811	0.168111	5214	10	3067474	3136805	537	0.908	800	0.7482
Q15056	EIF4H	-0.228609	-0.00994545	0.12881	-1.09595	0.273103	0.347915	7458	7	74174376	74197101	19	0.9081	108	0.8906
O60493	SNX3	-0.319494	-0.202922	0.142351	-1.53847	0.123937	0.228208	8724	6	108211217	108261260	116	0.9097	217	0.925
P42658	DPP6	-0.255758	-0.274962	0.147184	-1.26535	0.205746	0.294512	1804	7	153887097	154894290	3524	0.9107	3680	0.9074
Q9HAV7	GRPEL1	-0.181645	0.109198	0.142224	-0.907725	0.364025	0.426513	80273	4	7060053	7068073	27	0.9109	194	0.9125
O00330	PDHX	-0.29571	-0.217845	0.193361	-1.41221	0.157891	0.256931	8050	11	34915829	34996128	380	0.9111	607	0.9204
P27338	MAOB	-0.306636	-0.166505	0.184603	-1.46107	0.143999	0.248374	4129	23	43766610	43882475	27	0.9122	39	0.9415
O75116	ROCK2	-0.25425	-0.0195459	0.14254	-1.21928	0.222738	0.309059	9475	2	11179764	11345363	444	0.9134	616	0.7955
Q05639	EEF1A2	-0.345809	-0.12654	0.213492	-1.64216	0.100559	0.210276	1917	20	63488012	63499315	56	0.9136	331	0.61
P02792	FTL	-0.495753	-0.2438	0.239476	-2.36522	0.0180205	0.168111	2512	19	48965309	48966879	1	0.9136	130	0.5365
Q96E17	RAB3C	-0.0921276	0.0845383	0.136028	-0.455795	0.648538	0.672869	115827	5	58582127	58859394	843	0.9138	996	0.8908
Q9H330	TMEM245	0.0184835	0.0532492	-0.0256316	0.087672	0.930138	0.93363	23731	9	109015135	109119945	373	0.9138	544	0.9106
Q9Y450	HBS1L	-0.361909	-0.144575	0.173503	-1.72199	0.085074	0.199755	10767	6	134960378	135054898	199	0.9159	274	0.9219
P09622	DLD	-0.291828	-0.1778	0.189387	-1.39111	0.164195	0.26102	1738	7	107891107	107921198	55	0.9168	182	0.9281
Q8N3P4	VPS8	-0.461971	-0.246694	0.235479	-2.20513	0.0274463	0.168111	23355	3	184812137	185052614	431	0.9168	563	0.9369
Q9H9A6	LRRC40	-0.278207	-0.0447828	0.195931	-1.3405	0.180085	0.273879	55631	1	70144802	70205678	83	0.92	138	0.9221
Q15904	ATP6AP1	-0.0508354	-0.129554	0.088049	-0.242661	0.808268	0.818474	537	23	154428632	154436517	7	0.9202	59	0.5004
Q02338	BDH1	-0.420346	-0.201518	0.206716	-2.00432	0.0450378	0.168111	622	3	197509783	197573323	239	0.9212	462	0.8459
P54920	NAPA	-0.28109	-0.139772	0.151807	-1.33929	0.180478	0.274135	8775	19	47487634	47515258	46	0.9233	106	0.8912
P04843	RPN1	-0.241894	-0.16331	0.154547	-1.15348	0.248716	0.329158	6184	3	128619970	128650876	102	0.9239	239	0.9133
Q9GZT4	SRR	-0.132737	-0.0656373	0.0569916	-0.632502	0.52706	0.568148	63826	17	2303371	2325264	33	0.9239	171	0.9966
P16152	CBR1	-0.243601	0.0164025	0.124358	-1.17519	0.239919	0.322573	873	21	36069924	36073177	13	0.9243	167	0.9378
P61601	NCALD	-0.468075	-0.286817	0.186489	-2.30009	0.0214443	0.168111	83988	8	101686542	102124907	1353	0.9244	1509	0.8795
P10915	HAPLN1	-0.181977	-0.154235	0.0985524	-0.871613	0.383421	0.443089	1404	5	83638198	83721077	209	0.9256	303	0.9395
Q92777	SYN2	-0.394814	-0.231945	0.231689	-1.88305	0.0596956	0.182782	6854	3	12004360	12192032	448	0.9276	558	0.89
Q13884	SNTB1	-0.452092	-0.204771	0.190031	-2.15696	0.0310099	0.168111	6641	8	120535745	120812069	760	0.9279	878	0.9223
O75083	WDR1	-0.280314	-0.00708472	0.144246	-1.34931	0.177241	0.272066	9948	4	10074339	10116949	165	0.928	523	0.9062
P62873	GNB1	-0.307321	-0.155478	0.169887	-1.4644	0.143086	0.247952	2782	1	1785285	1891117	136	0.9303	242	0.9138
P60033	CD81	-0.432605	-0.260531	0.161824	-2.1205	0.0339651	0.168111	975	11	2376177	2397419	85	0.9313	266	0.8676
Q9ULH1	ASAP1	-0.419522	-0.181963	0.215876	-1.99718	0.045807	0.168111	50807	8	130052104	130443660	1247	0.9314	1413	0.928
Q86SK9	SCD5	-0.324384	-0.148735	0.140787	-1.54674	0.121928	0.22592	79966	4	82629537	82798857	792	0.9316	890	0.9121
P53779	MAPK10	-0.428116	-0.169038	0.220181	-2.03223	0.0421323	0.168111	5602	4	86012299	86594110	1610	0.9319	1742	0.9308
P84085	ARF5	-0.0668045	-0.01463	0.0512049	-0.316727	0.751451	0.765287	381	7	127588352	127591705	9	0.9332	126	0.372
P12036	NEFH	-0.415883	-0.202451	0.154529	-1.99436	0.0461147	0.168111	4744	22	29480192	29491290	31	0.936	149	0.8863
O14775	GNB5	-0.290441	-0.169373	0.165209	-1.38492	0.166079	0.26196	10681	15	52120926	52191368	201	0.9385	333	0.8596
Q4J6C6	PREPL	-0.176175	0.00982084	0.116427	-0.846785	0.397116	0.454124	9581	2	44317607	44361862	130	0.9397	255	0.9345
P62191	PSMC1	-0.390802	-0.143779	0.219125	-1.85338	0.0638294	0.185812	5700	14	90256550	90272622	69	0.9412	192	0.9844
O00429	DNM1L	-0.288716	0.00240568	0.180566	-1.40637	0.159616	0.25822	10059	12	32679200	32745650	255	0.943	449	0.8712
Q96CV9	OPTN	-0.56491	-0.336296	0.251753	-2.77334	0.00554905	0.168111	10133	10	13100075	13138291	107	0.9432	261	0.8499
Q9Y2C4	EXOG	-0.372606	-0.256253	0.206627	-1.79591	0.0725114	0.191651	9941	3	38496127	38526305	61	0.9444	148	0.954
O75936	BBOX1	-0.189051	0.0371746	0.117216	-0.916243	0.359541	0.423113	8424	11	27040705	27127807	277	0.9445	406	0.9549
Q9UPT5	EXOC7	-0.472499	-0.183295	0.239445	-2.24247	0.0249322	0.168111	23265	17	76080993	76103787	62	0.9447	204	0.587
P05387	RPLP2	-0.246574	-0.20327	0.0926842	-1.20764	0.227188	0.312528	6181	11	809936	812876	3	0.9453	109	0.8599
P99999	CYCS	-0.163312	-0.0745081	0.122405	-0.774206	0.43881	0.490147	54205	7	25118651	25125361	11	0.9471	165	0.9135
P62263	RPS14	-0.286373	-0.244404	0.0975967	-1.4212	0.155261	0.254121	6208	5	150444229	150449756	20	0.9477	154	0.6272
P60520	GABARAPL2	-0.386545	-0.227556	0.200563	-1.84748	0.0646791	0.186169	11345	16	75566351	75577881	25	0.9486	161	0.8271
P54829	PTPN5	-0.42571	-0.279075	0.204774	-2.07384	0.0380953	0.168111	84867	11	18727928	18792721	173	0.95	357	0.8817
Q13423	NNT	-0.177094	-0.016841	0.158435	-0.852821	0.39376	0.451885	23530	5	43602689	43705566	270	0.9516	367	0.9367
Q9Y291	MRPS33	-0.221488	-0.15944	0.100344	-1.06219	0.28815	0.359683	51650	7	141006161	141014981	15	0.9521	87	0.9201
Q10567	AP1B1	-0.327024	-0.0729302	0.201572	-1.56577	0.117404	0.223124	162	22	29327680	29388583	120	0.9523	248	0.7836
P17568	NDUFB7	-0.0725822	-0.101999	0.079803	-0.3461	0.729268	0.744113	4713	19	14566078	14572077	13	0.9532	151	0.4416
P48729	CSNK1A1	-0.285788	-0.226524	0.116707	-1.40187	0.160955	0.259034	1452	5	149495894	149551552	77	0.9543	173	0.7793
P63151	PPP2R2A	-0.348291	-0.103826	0.15891	-1.65114	0.0987125	0.209331	5520	8	26291491	26372680	182	0.9549	311	0.8758
P25786	PSMA1	-0.272066	-0.18493	0.137942	-1.30282	0.19264	0.282187	5682	11	14504876	14643634	187	0.9549	263	0.9547
Q02156	PRKCE	-0.508693	-0.315769	0.245953	-2.48208	0.0130628	0.168111	5581	2	45651315	46187990	1899	0.9553	2043	0.9699
Q9NTX5	ECHDC1	-0.430385	-0.16379	0.167103	-2.05188	0.0401827	0.168111	55862	6	127288712	127344069	109	0.9557	196	0.9496
P35612	ADD2	-0.191085	-0.10776	0.12456	-0.90954	0.363067	0.425701	119	2	70661202	70768243	364	0.9567	524	0.9469
P14618	PKM	-0.469819	-0.255276	0.203786	-2.26574	0.0234684	0.168111	5315	15	72199029	72231812	60	0.9581	137	0.9298
P40763	STAT3	-0.514799	-0.248151	0.240078	-2.45673	0.0140218	0.168111	6774	17	42313324	42388503	144	0.9588	275	0.8433
Q9NVE7	PANK4	-0.465081	-0.260996	0.229556	-2.22938	0.02579	0.168111	55229	1	2508531	2526628	39	0.96	150	0.6222
Q08752	PPID	-0.184785	-0.0413728	0.120747	-0.878799	0.379512	0.439839	5481	4	158709127	158723400	25	0.9606	106	0.9484
Q8N2F6	ARMC10	-0.38327	-0.273449	0.187934	-1.87298	0.0610724	0.184723	83787	7	103074727	103099763	27	0.9616	70	0.9084
Q9UEY8	ADD3	-0.315307	-0.118642	0.145251	-1.49927	0.133805	0.238289	120	10	109996365	110135565	290	0.9649	374	0.9864
P68371	TUBB4B	-0.455075	-0.200987	0.196482	-2.17029	0.0299867	0.168111	10383	9	137241259	137243707	2	0.9651	114	0.7337
P15531	NME1	-0.376073	-0.205113	0.159002	-1.80291	0.0714044	0.190495	4830	17	51153559	51162089	32	0.9674	161	0.8748
Q6Y1H2	HACD2	-0.311881	-0.173105	0.179585	-1.48687	0.137051	0.242102	201562	3	123494516	123585077	235	0.9678	334	0.9736
P19086	GNAZ	-0.383238	-0.226945	0.205147	-1.83016	0.0672282	0.186476	2781	22	23070483	23125034	111	0.9702	185	0.857
P29120	PCSK1	-0.16109	-0.177385	0.160838	-0.768373	0.442267	0.492979	5122	5	96390336	96433281	67	0.9706	190	0.8208
Q86YS7	C2CD5	-0.513202	-0.232976	0.258212	-2.44639	0.0144304	0.168111	9847	12	22448546	22544546	152	0.9726	207	0.8947
Q9BPW8	NIPSNAP1	-0.248922	-0.0453455	0.139083	-1.18589	0.235667	0.319535	8508	22	29554808	29581337	73	0.9736	215	0.9972
Q5T5U3	ARHGAP21	-0.461308	-0.223239	0.197057	-2.20405	0.027522	0.168111	57584	10	24583609	24723668	173	0.9753	299	0.7073
P18124	RPL7	-0.224736	-0.223048	0.0680035	-1.11617	0.264351	0.340578	6129	8	73290639	73294494	11	0.977	124	0.945
Q99747	NAPG	-0.325363	-0.187861	0.159198	-1.55337	0.120337	0.225547	8774	18	10525876	10552769	64	0.9776	230	0.9788
Q02790	FKBP4	-0.0640438	0.125935	0.0881756	-0.317201	0.751091	0.765287	2288	12	2794942	2805423	12	0.9778	103	0.7051
Q8N9I0	SYT2	0.0181308	0.101143	0.060869	0.088416	0.929546	0.933621	127833	1	202587637	202710444	286	0.9785	385	0.8218
Q12756	KIF1A	-0.403971	-0.137842	0.21343	-1.91601	0.0553654	0.180147	547	2	240713764	240821025	287	0.9792	430	0.9153
Q9Y484	WDR45	-0.380672	-0.235807	0.167267	-1.8437	0.0652287	0.186169	11152	23	49074433	49101121	5	0.9795	12	0.2987
P40855	PEX19	-0.478584	-0.260259	0.21699	-2.30245	0.021311	0.168111	5824	1	160276809	160285151	7	0.9817	68	0.9456
Q9Y4P8	WIPI2	-0.426313	-0.241326	0.229912	-2.03473	0.0418801	0.168111	26100	7	5190204	5233855	142	0.9818	399	0.863
O95674	CDS2	0.084443	-0.0448344	-0.00383505	0.402753	0.68713	0.706058	8760	20	5126761	5197887	178	0.9826	285	0.99
Q9UI12	ATP6V1H	-0.296707	-0.1866	0.210968	-1.41367	0.15746	0.256921	51606	8	53715543	53843311	131	0.9836	186	0.8428
P38606	ATP6V1A	-0.353359	-0.218339	0.226251	-1.68494	0.0920015	0.203685	523	3	113747019	113812058	78	0.9851	125	0.9874
Q00169	PITPNA	-0.39141	-0.173179	0.215646	-1.86059	0.0628036	0.184766	5306	17	1517989	1562816	148	0.9857	304	0.9884
P32969	RPL9	-0.240401	-0.215692	0.067996	-1.19092	0.233685	0.318193	6133	4	39454124	39458948	19	0.9862	211	0.9924
P25398	RPS12	-0.334641	-0.216878	0.173297	-1.60448	0.10861	0.216679	6206	6	132814569	132817564	17	0.987	186	0.8833
P35240	NF2	-0.384611	-0.206221	0.167526	-1.84036	0.0657175	0.186184	4771	22	29603556	29698600	168	0.991	310	0.9935
Q9UPQ0	LIMCH1	-0.511381	-0.274937	0.191346	-2.49785	0.012496	0.168111	22998	4	41359607	41700044	853	0.9918	1040	0.9793
P08247	SYP	-0.342024	-0.245725	0.102587	-1.69582	0.0899226	0.202552	6855	23	49187812	49200202	7	0.9939	39	0.7261
O95197	RTN3	-0.29763	-0.0727429	0.144448	-1.41315	0.157613	0.256921	10313	11	63681360	63759891	78	0.9956	123	0.9608
Q86UE4	MTDH	-0.419414	-0.306491	0.172409	-2.08327	0.0372286	0.168111	92140	8	97644147	97730260	165	0.9978	267	0.9594
O75170	PPP6R2	-0.465118	-0.188385	0.239718	-2.20936	0.0271508	0.168111	9701	22	50343317	50445090	329	0.9993	443	0.9857
P49588	AARS1	-0.437605	-0.126589	0.218253	-2.07907	0.0376121	0.168111	NA	NA	NA	NA	NA	NA	NA	NA
P30520	ADSS2	-0.195459	0.0186483	0.126866	-0.944142	0.345098	0.410636	NA	NA	NA	NA	NA	NA	NA	NA
P55196	AFDN	-0.4772	-0.254769	0.202656	-2.30174	0.0213511	0.168111	NA	NA	NA	NA	NA	NA	NA	NA
P25705	ATP5F1A	-0.226725	-0.164631	0.155051	-1.08117	0.279623	0.352884	NA	NA	NA	NA	NA	NA	NA	NA
P06576	ATP5F1B	-0.11536	-0.14509	0.105178	-0.550774	0.581789	0.615155	NA	NA	NA	NA	NA	NA	NA	NA
P36542	ATP5F1C	-0.232554	-0.186285	0.163426	-1.10972	0.267121	0.342495	NA	NA	NA	NA	NA	NA	NA	NA
P30049	ATP5F1D	-0.183192	-0.1553	0.144193	-0.873557	0.382361	0.442182	NA	NA	NA	NA	NA	NA	NA	NA
Q9UII2	ATP5IF1	-0.159651	-0.190627	0.137671	-0.766048	0.443649	0.493833	NA	NA	NA	NA	NA	NA	NA	NA
P05496	ATP5MC1	-0.239612	-0.154882	0.160269	-1.14221	0.253369	0.332301	NA	NA	NA	NA	NA	NA	NA	NA
P56385	ATP5ME	0.00441029	-0.0631158	0.0612401	0.0210055	0.983241	0.983855	NA	NA	NA	NA	NA	NA	NA	NA
P56134	ATP5MF	-0.139309	-0.109686	0.0811313	-0.664388	0.506443	0.549617	NA	NA	NA	NA	NA	NA	NA	NA
O75964	ATP5MG	-0.110686	-0.0816202	0.104523	-0.52586	0.598986	0.628779	NA	NA	NA	NA	NA	NA	NA	NA
P56378	ATP5MJ	-0.04348	-0.107323	0.0518386	-0.207729	0.83544	0.84439	NA	NA	NA	NA	NA	NA	NA	NA
P24539	ATP5PB	-0.229428	-0.183426	0.165213	-1.09451	0.273734	0.347915	NA	NA	NA	NA	NA	NA	NA	NA
O75947	ATP5PD	-0.236881	-0.170447	0.174846	-1.12936	0.258747	0.336057	NA	NA	NA	NA	NA	NA	NA	NA
P48047	ATP5PO	-0.22938	-0.180785	0.139038	-1.09687	0.272698	0.347915	NA	NA	NA	NA	NA	NA	NA	NA
Q96MC5	BMERB1	-0.382167	-0.143606	0.234208	-1.81468	0.0695746	0.18901	NA	NA	NA	NA	NA	NA	NA	NA
P49589	CARS1	-0.227922	-0.0330392	0.139499	-1.08878	0.276253	0.349847	NA	NA	NA	NA	NA	NA	NA	NA
Q6NV74	CRACDL	-0.523041	-0.384969	0.242022	-2.62138	0.00875842	0.168111	NA	NA	NA	NA	NA	NA	NA	NA
Q9H0Q0	CYRIA	-0.302125	-0.0242953	0.154706	-1.45077	0.146846	0.248546	NA	NA	NA	NA	NA	NA	NA	NA
P14868	DARS1	-0.330321	-0.121797	0.186295	-1.56613	0.11732	0.223124	NA	NA	NA	NA	NA	NA	NA	NA
Q15369	ELOC	-0.376342	-0.0937742	0.179106	-1.78839	0.0737143	0.192473	NA	NA	NA	NA	NA	NA	NA	NA
P09104	ENO2	-0.265306	-0.138284	0.0717244	-1.27311	0.202982	0.292003	2026	12	6914450	6923696	0	NA	3	0.4468
P07814	EPRS1	-0.30357	-0.17319	0.162103	-1.44773	0.147694	0.248546	NA	NA	NA	NA	NA	NA	NA	NA
O43681	GET3	-0.268009	-0.0638329	0.167258	-1.27784	0.201308	0.290165	NA	NA	NA	NA	NA	NA	NA	NA
P25098	GRK2	-0.431045	-0.223308	0.219392	-2.05592	0.0397921	0.168111	NA	NA	NA	NA	NA	NA	NA	NA
Q02153	GUCY1B1	-0.319114	-0.145565	0.181438	-1.51683	0.129313	0.232729	NA	NA	NA	NA	NA	NA	NA	NA
P07305	H1-0	-0.22487	-0.174139	0.0795727	-1.09305	0.274374	0.348453	NA	NA	NA	NA	NA	NA	NA	NA
Q92522	H1-10	-0.267924	-0.199288	0.0817354	-1.31455	0.188662	0.278906	NA	NA	NA	NA	NA	NA	NA	NA
P10412	H1-4	-0.297136	-0.183472	0.101247	-1.43928	0.150074	0.250695	NA	NA	NA	NA	NA	NA	NA	NA
Q5QNW6	H2BC18	-0.383129	-0.184517	0.157347	-1.8288	0.0674307	0.186476	NA	NA	NA	NA	NA	NA	NA	NA
P12081	HARS1	-0.324209	-0.0574503	0.177812	-1.55099	0.120906	0.225614	NA	NA	NA	NA	NA	NA	NA	NA
P41252	IARS1	-0.425108	-0.223513	0.281878	-2.01987	0.0433984	0.168111	NA	NA	NA	NA	NA	NA	NA	NA
P01857	IGHG1	-0.373742	-0.251934	0.0960299	-1.86073	0.0627845	0.184766	NA	NA	NA	NA	NA	NA	NA	NA
Q9Y6F6	IRAG1	-0.174601	-0.0430592	0.07482	-0.827815	0.407777	0.462897	NA	NA	NA	NA	NA	NA	NA	NA
Q15046	KARS1	-0.297701	-0.0508168	0.216509	-1.43886	0.150193	0.250695	NA	NA	NA	NA	NA	NA	NA	NA
Q6YP21	KYAT3	-0.201312	-0.0153587	0.114766	-0.961227	0.33644	0.403664	NA	NA	NA	NA	NA	NA	NA	NA
Q9P2J5	LARS1	-0.374182	-0.166676	0.215883	-1.77655	0.0756449	0.193599	NA	NA	NA	NA	NA	NA	NA	NA
Q8WWC4	MAIP1	-0.294056	-0.0350234	0.202658	-1.42332	0.154646	0.253892	NA	NA	NA	NA	NA	NA	NA	NA
P56192	MARS1	-0.326793	-0.138383	0.209221	-1.54957	0.121247	0.225614	NA	NA	NA	NA	NA	NA	NA	NA
Q6P9B6	MEAK7	-0.285021	-0.211828	0.145026	-1.37659	0.168643	0.263612	NA	NA	NA	NA	NA	NA	NA	NA
Q5XKP0	MICOS13	-0.355665	-0.228047	0.176604	-1.71106	0.0870712	0.202151	NA	NA	NA	NA	NA	NA	NA	NA
Q9BRT3	MIEN1	-0.225971	-0.0163993	0.105408	-1.07701	0.281478	0.354784	84299	17	39729156	39730541	0	NA	58	0.1785
P22033	MMUT	-0.396012	-0.0226325	0.256155	-1.95172	0.0509727	0.175515	NA	NA	NA	NA	NA	NA	NA	NA
P00403	MT-CO2	-0.244406	-0.177988	0.167076	-1.1656	0.243776	0.325844	NA	NA	NA	NA	NA	NA	NA	NA
P03886	MT-ND1	-0.0786356	-0.12177	0.0965513	-0.375023	0.707644	0.724353	NA	NA	NA	NA	NA	NA	NA	NA
P03891	MT-ND2	-0.116772	-0.140701	0.115619	-0.556959	0.577556	0.611485	NA	NA	NA	NA	NA	NA	NA	NA
P03915	MT-ND5	-0.0761595	-0.138717	0.0853939	-0.364241	0.715678	0.731643	NA	NA	NA	NA	NA	NA	NA	NA
Q969Z3	MTARC2	-0.275015	-0.162763	0.161978	-1.31127	0.189768	0.280025	NA	NA	NA	NA	NA	NA	NA	NA
Q8NC96	NECAP1	-0.313202	-0.135338	0.202025	-1.48487	0.13758	0.242771	NA	NA	NA	NA	NA	NA	NA	NA
O75323	NIPSNAP2	-0.294883	-0.0769717	0.152125	-1.40045	0.161382	0.259115	NA	NA	NA	NA	NA	NA	NA	NA
Q15233	NONO	-0.372414	-0.230495	0.191268	-1.78518	0.0742349	0.192674	4841	23	71283192	71301168	0	NA	2	0.03106
Q8IXS6	PALM2AKAP2	-0.453909	-0.211555	0.22784	-2.16398	0.0304672	0.168111	NA	NA	NA	NA	NA	NA	NA	NA
Q8N3R9	PALS1	-0.472309	-0.249509	0.210391	-2.26715	0.0233825	0.168111	NA	NA	NA	NA	NA	NA	NA	NA
Q9NZW5	PALS2	-0.369884	-0.095099	0.219464	-1.7676	0.0771294	0.194362	NA	NA	NA	NA	NA	NA	NA	NA
Q99623	PHB2	-0.0850154	-0.125013	0.0603365	-0.407364	0.683742	0.703027	NA	NA	NA	NA	NA	NA	NA	NA
Q9UPV7	PHF24	-0.382173	-0.214285	0.163056	-1.83635	0.0663075	0.186476	NA	NA	NA	NA	NA	NA	NA	NA
O14495	PLPP3	-0.233511	-0.172555	0.129619	-1.11644	0.264234	0.340578	NA	NA	NA	NA	NA	NA	NA	NA
Q86TP1	PRUNE1	-0.362161	-0.146855	0.189885	-1.71974	0.085481	0.200163	NA	NA	NA	NA	NA	NA	NA	NA
Q9BRX8	PRXL2A	-0.059791	-0.00174663	0.0259671	-0.283468	0.776818	0.788119	NA	NA	NA	NA	NA	NA	NA	NA
Q15257	PTPA	-0.0737237	0.131214	0.0547108	-0.36254	0.716949	0.732476	NA	NA	NA	NA	NA	NA	NA	NA
P47897	QARS1	-0.280209	-0.0727033	0.165707	-1.33352	0.182362	0.275534	NA	NA	NA	NA	NA	NA	NA	NA
P63244	RACK1	-0.202934	-0.148667	0.0983014	-0.970482	0.331808	0.399564	NA	NA	NA	NA	NA	NA	NA	NA
P54136	RARS1	-0.351956	-0.107872	0.21037	-1.67508	0.0939201	0.204407	NA	NA	NA	NA	NA	NA	NA	NA
Q9P260	RELCH	-0.455022	-0.188269	0.233707	-2.16327	0.0305221	0.168111	NA	NA	NA	NA	NA	NA	NA	NA
P08708	RPS17	-0.250708	-0.241026	0.106403	-1.23976	0.215066	0.302072	6218	15	82536750	82540544	0	NA	65	0.2746
A6ZKI3	RTL8C	-0.223656	-0.183112	0.0862599	-1.08884	0.276225	0.349847	NA	NA	NA	NA	NA	NA	NA	NA
Q9Y224	RTRAF	-0.398122	-0.205476	0.17403	-1.90241	0.0571189	0.1805	NA	NA	NA	NA	NA	NA	NA	NA
O75396	SEC22B	-0.27051	-0.0857573	0.144752	-1.2828	0.199565	0.288641	9554	1	120155942	120176521	0	NA	7	0.5306
Q9P0V9	SEPTIN10	-0.474136	-0.254661	0.179401	-2.30569	0.0211291	0.168111	NA	NA	NA	NA	NA	NA	NA	NA
Q9NVA2	SEPTIN11	-0.323315	-0.26766	0.18612	-1.57727	0.114735	0.222615	NA	NA	NA	NA	NA	NA	NA	NA
Q15019	SEPTIN2	-0.380464	-0.210391	0.135986	-1.84229	0.0654351	0.186184	NA	NA	NA	NA	NA	NA	NA	NA
Q9UH03	SEPTIN3	-0.322825	-0.195812	0.210344	-1.53894	0.123821	0.228208	NA	NA	NA	NA	NA	NA	NA	NA
O43236	SEPTIN4	-0.516866	-0.253913	0.225203	-2.47463	0.0133384	0.168111	NA	NA	NA	NA	NA	NA	NA	NA
Q99719	SEPTIN5	-0.377626	-0.227866	0.254327	-1.79998	0.0718665	0.191163	NA	NA	NA	NA	NA	NA	NA	NA
Q14141	SEPTIN6	-0.269021	-0.174766	0.227841	-1.27693	0.201628	0.290315	NA	NA	NA	NA	NA	NA	NA	NA
Q16181	SEPTIN7	-0.403789	-0.283999	0.203753	-1.97168	0.0486476	0.171874	NA	NA	NA	NA	NA	NA	NA	NA
Q92599	SEPTIN8	-0.473222	-0.268404	0.20711	-2.29283	0.0218594	0.168111	NA	NA	NA	NA	NA	NA	NA	NA
Q9UHD8	SEPTIN9	-0.440939	-0.268793	0.246391	-2.10971	0.034885	0.168111	NA	NA	NA	NA	NA	NA	NA	NA
A0MZ66	SHTN1	-0.341124	-0.0943362	0.168192	-1.61914	0.105419	0.214312	NA	NA	NA	NA	NA	NA	NA	NA
P11169	SLC2A3	-0.192517	-0.209172	0.0874532	-0.946445	0.343923	0.409796	NA	NA	NA	NA	NA	NA	NA	NA
Q8N0X7	SPART	-0.399445	-0.176546	0.20632	-1.90205	0.0571659	0.1805	NA	NA	NA	NA	NA	NA	NA	NA
Q53FP2	TMEM35A	-0.100334	-0.0535449	0.0749704	-0.476291	0.633867	0.658926	NA	NA	NA	NA	NA	NA	NA	NA
O94826	TOMM70	-0.323432	-0.124651	0.202745	-1.53473	0.124851	0.228706	NA	NA	NA	NA	NA	NA	NA	NA
P60174	TPI1	-0.160969	0.0596713	0.115601	-0.785526	0.432146	0.48439	7167	12	6867420	6870946	0	NA	9	0.5765
P51809	VAMP7	-0.221344	-0.00259171	0.1546	-1.06945	0.284867	0.35763	NA	NA	NA	NA	NA	NA	NA	NA
P26640	VARS1	-0.214539	0.025234	0.185053	-1.05425	0.29177	0.363072	NA	NA	NA	NA	NA	NA	NA	NA
Q7Z3J2	VPS35L	-0.420093	-0.105034	0.227615	-2.00597	0.0448613	0.168111	NA	NA	NA	NA	NA	NA	NA	NA
Q96JG6	VPS50	-0.438941	-0.178296	0.230728	-2.08393	0.0371679	0.168111	NA	NA	NA	NA	NA	NA	NA	NA
P54577	YARS1	-0.304658	-0.042481	0.181614	-1.46419	0.143144	0.247952	NA	NA	NA	NA	NA	NA	NA	NA
